# Supplementary material for: Non–linear bonding trends in maleonitrile-1,2–dithiolate complexes of the transuranium actinides (An3+ = Np3+ – Cf3+ excl. Bk3+)
Source: Research Square preprint supplement (doi:10.21203/rs.3.rs-6100125/v1), 2025-03-05

## checkCIF/PLATON report

Structure factors have been supplied for datablock(s) pu\_mnt\_082322\_0m

THIS REPORT IS FOR GUIDANCE ONLY. IF USED AS PART OF A REVIEW PROCEDURE FOR PUBLICATION, IT SHOULD NOT REPLACE THE EXPERTISE OF AN EXPERIENCED CRYSTALLOGRAPHIC REFEREE.

No syntax errors found. CIF dictionary Interpreting this report

**Datablock: pu\_mnt\_082322\_0m**

|                 |                |                    |               |  |
|-----------------|----------------|--------------------|---------------|--|
| Bond precision: | C-C = 0.0106 Å | Wavelength=0.71073 |               |  |
| Cell:           | a=14.1718(10)  | b=18.5779(11)      | c=18.0434(11) |  |
|                 | alpha=90       | beta=91.772(2)     | gamma=90      |  |
| Temperature:    | 100 K          |                    |               |  |

|                        | Calculated           | Reported             |
|------------------------|----------------------|----------------------|
| Volume                 | 4748.2(5)            | 4748.2(5)            |
| Space group            | P 21/n               | P 1 21/n 1           |
| Hall group             | -P 2yn               | -P 2yn               |
| Moiety formula         | C28 H18 K5 N14 Pu S8 | C28 H18 K5 N14 Pu S8 |
| Sum formula            | C28 H18 K5 N14 Pu S8 | C28 H18 K5 N14 Pu S8 |
| Mr                     | 1244.55              | 1244.54              |
| Dx, g cm <sup>-3</sup> | 1.741                | 1.741                |
| Z                      | 4                    | 4                    |
| Mu (mm <sup>-1</sup> ) | 2.217                | 2.217                |
| F000                   | 2404.0               | 2404.0               |
| F000'                  | 2374.66              |                      |
| h, k, lmax             | 19, 25, 24           | 19, 25, 24           |
| Nref                   | 12340                | 12305                |
| Tmin, Tmax             | 0.643, 0.845         | 0.609, 0.746         |
| Tmin'                  | 0.532                |                      |

```
Correction method= # Reported T Limits: Tmin=0.609 Tmax=0.746
AbsCorr = MULTI-SCAN
```

Data completeness= 0.997                      Theta (max)= 28.750

|                                |                                  |
|--------------------------------|----------------------------------|
| R(reflections)= 0.0456( 10564) | wR2(reflections)= 0.1080( 12305) |
| S = 1.132                      | Npar= 539                        |

---

The following ALERTS were generated. Each ALERT has the format

**test-name\_ALERT\_alert-type\_alert-level.**

Click on the hyperlinks for more details of the test.

---

### Alert level B

|                   |            |           |                                 |                         |       |       |
|-------------------|------------|-----------|---------------------------------|-------------------------|-------|-------|
| PLAT220_ALERT_2_B | NonSolvent | Resd 1    | C                               | Ueq(max)/Ueq(min) Range | 7.4   | Ratio |
| PLAT241_ALERT_2_B | High       | 'MainMol' | Ueq as Compared to Neighbors of | N20                     | Check |       |
| PLAT242_ALERT_2_B | Low        | 'MainMol' | Ueq as Compared to Neighbors of | K4                      | Check |       |
| PLAT242_ALERT_2_B | Low        | 'MainMol' | Ueq as Compared to Neighbors of | C18                     | Check |       |

---

### Alert level C

CHEMW01\_ALERT\_1\_C The difference between the given and expected weight for compound is greater 1 mass unit. Check that all hydrogen atoms have been taken into account.

|                   |                                                  |                 |                                 |                           |        |       |
|-------------------|--------------------------------------------------|-----------------|---------------------------------|---------------------------|--------|-------|
| PLAT220_ALERT_2_C | NonSolvent                                       | Resd 1          | N                               | Ueq(max)/Ueq(min) Range   | 3.5    | Ratio |
| PLAT222_ALERT_3_C | NonSolvent                                       | Resd 1          | H                               | Uiso(max)/Uiso(min) Range | 5.1    | Ratio |
| PLAT241_ALERT_2_C | High                                             | 'MainMol'       | Ueq as Compared to Neighbors of | N00Z                      | Check  |       |
| PLAT241_ALERT_2_C | High                                             | 'MainMol'       | Ueq as Compared to Neighbors of | N3                        | Check  |       |
| PLAT241_ALERT_2_C | High                                             | 'MainMol'       | Ueq as Compared to Neighbors of | N018                      | Check  |       |
| PLAT241_ALERT_2_C | High                                             | 'MainMol'       | Ueq as Compared to Neighbors of | N8                        | Check  |       |
| PLAT241_ALERT_2_C | High                                             | 'MainMol'       | Ueq as Compared to Neighbors of | N10                       | Check  |       |
| PLAT242_ALERT_2_C | Low                                              | 'MainMol'       | Ueq as Compared to Neighbors of | K3                        | Check  |       |
| PLAT242_ALERT_2_C | Low                                              | 'MainMol'       | Ueq as Compared to Neighbors of | K5                        | Check  |       |
| PLAT242_ALERT_2_C | Low                                              | 'MainMol'       | Ueq as Compared to Neighbors of | C01C                      | Check  |       |
| PLAT242_ALERT_2_C | Low                                              | 'MainMol'       | Ueq as Compared to Neighbors of | C01I                      | Check  |       |
| PLAT342_ALERT_3_C | Low Bond Precision on                            | C-C Bonds ..... |                                 | 0.01059                   | Ang.   |       |
| PLAT767_ALERT_4_C | INS Embedded LIST 6 Instruction Should be LIST 4 |                 |                                 | Please                    | Check  |       |
| PLAT906_ALERT_3_C | Large K Value in the Analysis of Variance .....  |                 |                                 | 3.048                     | Check  |       |
| PLAT911_ALERT_3_C | Missing FCF Refl Between Thmin & STh/L=          | 0.600           |                                 | 2                         | Report |       |
|                   | 1 0 1, 2 0 4,                                    |                 |                                 |                           |        |       |
| PLAT971_ALERT_2_C | Check Calcd Resid. Dens.                         | 1.74Ang         | From C20                        | 1.82                      | eA-3   |       |
| PLAT971_ALERT_2_C | Check Calcd Resid. Dens.                         | 0.94Ang         | From K2                         | 1.74                      | eA-3   |       |
| PLAT971_ALERT_2_C | Check Calcd Resid. Dens.                         | 1.47Ang         | From C01F                       | 1.73                      | eA-3   |       |
| PLAT971_ALERT_2_C | Check Calcd Resid. Dens.                         | 1.52Ang         | From K5                         | 1.56                      | eA-3   |       |
| PLAT971_ALERT_2_C | Check Calcd Resid. Dens.                         | 1.48Ang         | From N10                        | 1.52                      | eA-3   |       |
| PLAT972_ALERT_2_C | Check Calcd Resid. Dens.                         | 0.65Ang         | From K2                         | -1.93                     | eA-3   |       |
| PLAT972_ALERT_2_C | Check Calcd Resid. Dens.                         | 0.78Ang         | From Pu01                       | -1.64                     | eA-3   |       |
| PLAT972_ALERT_2_C | Check Calcd Resid. Dens.                         | 0.26Ang         | From K2                         | -1.61                     | eA-3   |       |

---

### Alert level G

|                   |                                                  |                |  |        |        |  |
|-------------------|--------------------------------------------------|----------------|--|--------|--------|--|
| PLAT002_ALERT_2_G | Number of Distance or Angle Restraints on AtSite |                |  | 4      | Note   |  |
| PLAT003_ALERT_2_G | Number of Uiso or U(i,j) Restrained non-H Atoms  |                |  | 7      | Report |  |
| PLAT004_ALERT_5_G | Polymeric Structure Found with Maximum Dimension |                |  | 3      | Info   |  |
| PLAT083_ALERT_2_G | SHELXL Second Parameter in WGHT Unusually Large  |                |  | 37.57  | Why ?  |  |
| PLAT172_ALERT_4_G | The CIF-Embedded .res File Contains DFIX Records |                |  | 3      | Report |  |
| PLAT176_ALERT_4_G | The CIF-Embedded .res File Contains SADI Records |                |  | 3      | Report |  |
| PLAT186_ALERT_4_G | The CIF-Embedded .res File Contains ISOR Records |                |  | 3      | Report |  |
| PLAT300_ALERT_4_G | Atom Site Occupancy of N11                       | Constrained at |  | 0.6667 | Check  |  |
| PLAT300_ALERT_4_G | Atom Site Occupancy of C016                      | Constrained at |  | 0.6667 | Check  |  |
| PLAT300_ALERT_4_G | Atom Site Occupancy of C017                      | Constrained at |  | 0.6667 | Check  |  |
| PLAT300_ALERT_4_G | Atom Site Occupancy of N9                        | Constrained at |  | 0.3333 | Check  |  |
| PLAT300_ALERT_4_G | Atom Site Occupancy of C0                        | Constrained at |  | 0.3333 | Check  |  |

```

PLAT300_ALERT_4_G Atom Site Occupancy of C21          Constrained at      0.3333 Check
PLAT300_ALERT_4_G Atom Site Occupancy of H01A          Constrained at      0.6667 Check
PLAT300_ALERT_4_G Atom Site Occupancy of H01B          Constrained at      0.6667 Check
PLAT300_ALERT_4_G Atom Site Occupancy of H01C          Constrained at      0.6667 Check
PLAT300_ALERT_4_G Atom Site Occupancy of H21A          Constrained at      0.3333 Check
PLAT300_ALERT_4_G Atom Site Occupancy of H21B          Constrained at      0.3333 Check
PLAT300_ALERT_4_G Atom Site Occupancy of H21C          Constrained at      0.3333 Check
PLAT301_ALERT_3_G Main Residue Disorder .....(Resd  1)      5% Note
PLAT432_ALERT_2_G Short Inter X...Y Contact  S5      ..S7      .      3.16 Ang.
                                     5/2-x,-1/2+y,3/2-z =      2_746 Check
PLAT720_ALERT_4_G Number of Unusual/Non-Standard Labels .....      25 Note
      Pu01      N00Z      N012      C014      C016      C017      H01A      H01B
      H01C      N018      C01A      H01D      H01E      H01F      C01C      C01E
      H01G      H01H      H01I      C01F      H01J      H01K      H01L      C01I
      CO
PLAT764_ALERT_4_G Overcomplete CIF Bond List Detected (Rep/Expd) .      1.12 Ratio
PLAT774_ALERT_1_G Check  X-Y Bond in CIF: Pu01      --K3      ..      4.25 Ang.
PLAT774_ALERT_1_G Check  X-Y Bond in CIF: Pu01      --K1      ..      4.10 Ang.
PLAT774_ALERT_1_G Check  X-Y Bond in CIF: K3      --K2      ..      4.19 Ang.
PLAT774_ALERT_1_G Check  X-Y Bond in CIF: K5      --K2      ..      4.44 Ang.
PLAT779_ALERT_4_G Suspect or Irrelevant (Bond) Angle(s) in CIF ...      38.70 Deg.
      N20      -C18      -K4      1_555      1_555      1_555      .....      #      274 Check
PLAT779_ALERT_4_G Suspect or Irrelevant (Bond) Angle(s) in CIF ...      36.20 Deg.
      N9      -C0      -K1      1_555      1_555      1_555      .....      #      339 Check
PLAT860_ALERT_3_G Number of Least-Squares Restraints .....      45 Note
PLAT910_ALERT_3_G Missing # of FCF Reflection(s) Below Theta(Min).      2 Note
      -1      0      1,      0      1      1,
PLAT912_ALERT_4_G Missing # of FCF Reflections Above STh/L= 0.600      29 Note
PLAT933_ALERT_2_G Number of HKL-OMIT Records in Embedded .res File      2 Note
      1      0      1,      2      0      4,
PLAT969_ALERT_5_G The 'Henn et al.' R-Factor-gap value .....      4.829 Note
      Predicted wR2: Based on SigI**2 2.24 or SHELX Weight 9.55
PLAT978_ALERT_2_G Number C-C Bonds with Positive Residual Density.      0 Info

```

---

```

0 ALERT level A = Most likely a serious problem - resolve or explain
4 ALERT level B = A potentially serious problem, consider carefully
24 ALERT level C = Check. Ensure it is not caused by an omission or oversight
35 ALERT level G = General information/check it is not something unexpected

5 ALERT type 1 CIF construction/syntax error, inconsistent or missing data
28 ALERT type 2 Indicator that the structure model may be wrong or deficient
7 ALERT type 3 Indicator that the structure quality may be low
21 ALERT type 4 Improvement, methodology, query or suggestion
2 ALERT type 5 Informative message, check

```

---

## Validation response form

Please find below a validation response form (VRF) that can be filled in and pasted into your CIF.

```

# start Validation Reply Form
_vrf_PLAT220_pu_mnt_082322_0m
;
PROBLEM: NonSolvent      Resd 1      C      Ueq(max)/Ueq(min) Range      7.4 Ratio
RESPONSE: ...
;

```

```

_vrf_PLAT241_pu_mnt_082322_0m
;
PROBLEM: High      'MainMol' Ueq as Compared to Neighbors of      N20 Check
RESPONSE: ...
;
_vrf_PLAT242_pu_mnt_082322_0m
;
PROBLEM: Low       'MainMol' Ueq as Compared to Neighbors of      K4 Check
RESPONSE: ...
;
# end Validation Reply Form

```

---

It is advisable to attempt to resolve as many as possible of the alerts in all categories. Often the minor alerts point to easily fixed oversights, errors and omissions in your CIF or refinement strategy, so attention to these fine details can be worthwhile. In order to resolve some of the more serious problems it may be necessary to carry out additional measurements or structure refinements. However, the purpose of your study may justify the reported deviations and the more serious of these should normally be commented upon in the discussion or experimental section of a paper or in the "special\_details" fields of the CIF. checkCIF was carefully designed to identify outliers and unusual parameters, but every test has its limitations and alerts that are not important in a particular case may appear. Conversely, the absence of alerts does not guarantee there are no aspects of the results needing attention. It is up to the individual to critically assess their own results and, if necessary, seek expert advice.

### **Publication of your CIF in IUCr journals**

A basic structural check has been run on your CIF. These basic checks will be run on all CIFs submitted for publication in IUCr journals (*Acta Crystallographica*, *Journal of Applied Crystallography*, *Journal of Synchrotron Radiation*); however, if you intend to submit to *Acta Crystallographica Section C* or *E* or *IUCrData*, you should make sure that full publication checks are run on the final version of your CIF prior to submission.

### **Publication of your CIF in other journals**

Please refer to the *Notes for Authors* of the relevant journal for any special instructions relating to CIF submission.

---

**PLATON version of 15/07/2024; check.def file version of 15/07/2024**

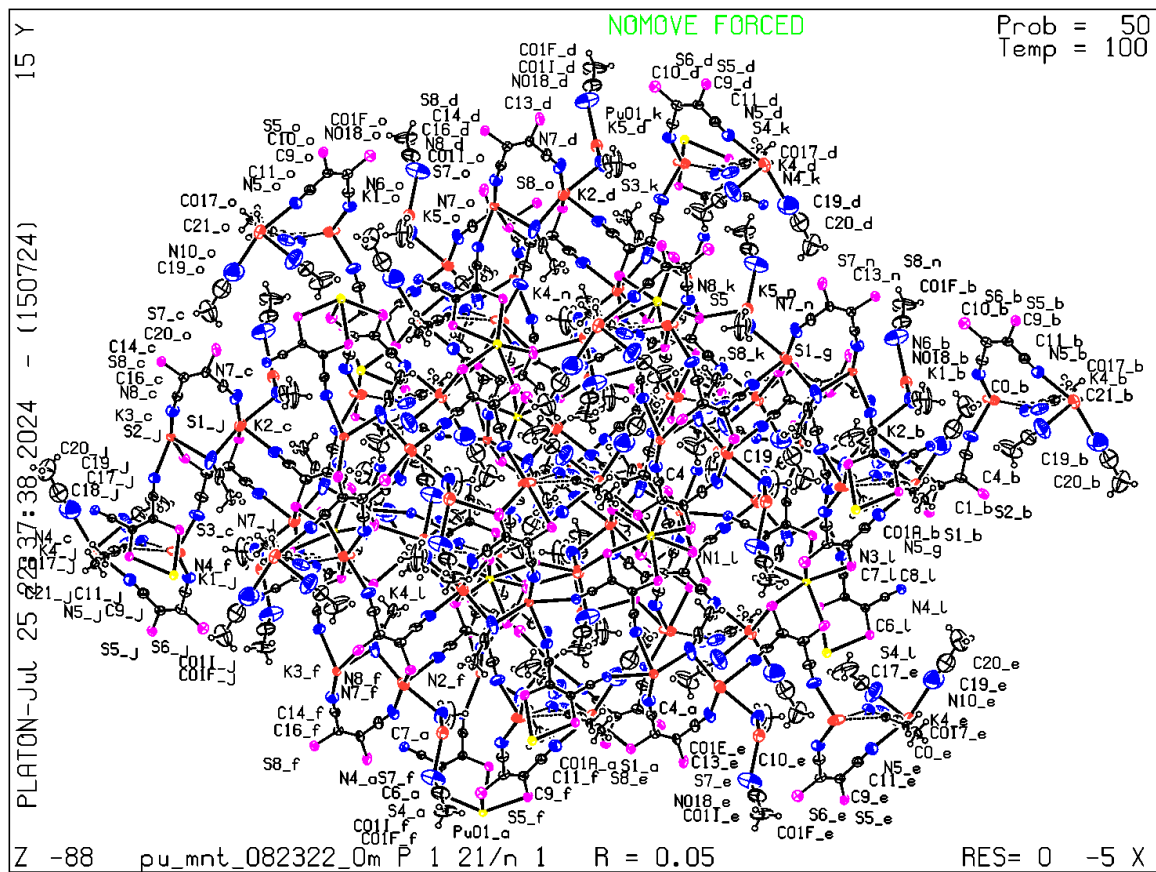

Supplement: Supplementary file 13 [file pu_beta_checkcif.pdf › finished cifs/pu_beta_checkcif.pdf]
