# Supplementary material for: Non–linear bonding trends in maleonitrile-1,2–dithiolate complexes of the transuranium actinides (An3+ = Np3+ – Cf3+ excl. Bk3+)
Source: Research Square preprint supplement (doi:10.21203/rs.3.rs-6100125/v1), 2025-03-05

## checkCIF/PLATON report

Structure factors have been supplied for datablock(s) dymnt\_031121\_nbb\_0m

THIS REPORT IS FOR GUIDANCE ONLY. IF USED AS PART OF A REVIEW PROCEDURE FOR PUBLICATION, IT SHOULD NOT REPLACE THE EXPERTISE OF AN EXPERIENCED CRYSTALLOGRAPHIC REFEREE.

No syntax errors found.      CIF dictionary      Interpreting this report

### Datablock: dymnt\_031121\_nbb\_0m

---

Bond precision:      C-C = 0.0073 Å      Wavelength=0.71073

Cell:                      a=13.6517(5)      b=18.3713(7)      c=17.5608(7)  
                                alpha=90                  beta=92.063(1)      gamma=90

Temperature:              100 K

|                        | Calculated                           | Reported          |
|------------------------|--------------------------------------|-------------------|
| Volume                 | 4401.4(3)                            | 4401.4(3)         |
| Space group            | P 21/n                               | P 1 21/n 1        |
| Hall group             | -P 2yn                               | -P 2yn            |
| Moiety formula         | C32 Dy2 N16 S16, 12(C2 N),<br>10(Na) | C28 Dy N14 Na5 S8 |
| Sum formula            | C56 Dy2 N28 Na10 S16                 | C28 Dy N14 Na5 S8 |
| Mr                     | 2132.70                              | 1066.35           |
| Dx, g cm <sup>-3</sup> | 1.609                                | 1.609             |
| Z                      | 2                                    | 4                 |
| Mu (mm <sup>-1</sup> ) | 2.166                                | 2.166             |
| F000                   | 2060.0                               | 2060.0            |
| F000'                  | 2064.11                              |                   |
| h,k,lmax               | 20,27,25                             | 20,27,25          |
| Nref                   | 14698                                | 14672             |
| Tmin,Tmax              | 0.771,0.805                          | 0.572,0.746       |
| Tmin'                  | 0.648                                |                   |

Correction method= # Reported T Limits: Tmin=0.572 Tmax=0.746  
AbsCorr = MULTI-SCAN

Data completeness= 0.998      Theta(max)= 31.545

R(reflections)= 0.0377( 12711)

wR2(reflections)=  
0.1099( 14672)

S = 1.177

Npar= 506

---

The following ALERTS were generated. Each ALERT has the format

**test-name\_ALERT\_alert-type\_alert-level.**

Click on the hyperlinks for more details of the test.

---

### Alert level B

|                   |                                                  |          |       |
|-------------------|--------------------------------------------------|----------|-------|
| PLAT919_ALERT_3_B | Reflection # Likely Affected by the Beamstop ... | 1        | Check |
|                   | 1 1 1,                                           |          |       |
| PLAT934_ALERT_3_B | Number of (Iobs-Icalc)/Sigma(W) > 10 Outliers .. | 6        | Check |
|                   | 3 1 0, 3 2 0, 1 1 1, -3 3 1, -1 2 2,             | 13 5 18, |       |
| PLAT939_ALERT_3_B | Large Value of Not (SHELXL) Weight Optimized S . | 233.76   | Check |

---

### Alert level C

|                   |                                                  |         |        |
|-------------------|--------------------------------------------------|---------|--------|
| PLAT042_ALERT_1_C | Calc. and Reported MoietyFormula Strings Differ  | Please  | Check  |
|                   | Calc: C32 Dy2 N16 S16, 12(C2 N), 10(Na)          |         |        |
|                   | Rep.: C28 Dy N14 Na5 S8                          |         |        |
| PLAT244_ALERT_4_C | Low 'Solvent' Ueq as Compared to Neighbors of    | C01A    | Check  |
| PLAT244_ALERT_4_C | Low 'Solvent' Ueq as Compared to Neighbors of    | C01G    | Check  |
| PLAT244_ALERT_4_C | Low 'Solvent' Ueq as Compared to Neighbors of    | C01H    | Check  |
| PLAT244_ALERT_4_C | Low 'Solvent' Ueq as Compared to Neighbors of    | C22     | Check  |
| PLAT260_ALERT_2_C | Large Average Ueq of Residue Including N01C      | 0.101   | Check  |
| PLAT260_ALERT_2_C | Large Average Ueq of Residue Including N14       | 0.117   | Check  |
| PLAT910_ALERT_3_C | Missing # of FCF Reflection(s) Below Theta(Min). | 6       | Note   |
|                   | 1 1 0, 0 2 0, -1 0 1, 1 0 1, -1 1 1,             | 0 1 1,  |        |
| PLAT911_ALERT_3_C | Missing FCF Refl Between Thmin & STh/L= 0.600    | 14      | Report |
|                   | 1 2 0, -1 2 1, 0 2 1, 0 0 2, 0 1 2,              | -2 5 2, |        |
|                   | -2 0 4, -2 1 4, 2 1 4, 3 1 4, -3 1 5,            | 3 1 5,  |        |
|                   | 7 0 9, 1 0 11,                                   |         |        |
| PLAT913_ALERT_3_C | Missing # of Very Strong Reflections in FCF .... | 8       | Note   |
|                   | -1 0 1, 1 0 1, -2 5 2, -2 0 4, 2 1 4,            | 3 1 4,  |        |
|                   | -3 1 5, 3 1 5,                                   |         |        |
| PLAT918_ALERT_3_C | Reflection(s) with I(obs) much Smaller I(calc) . | 5       | Check  |
| PLAT971_ALERT_2_C | Check Calcd Resid. Dens. 0.40Ang From Na3        | 1.61    | eA-3   |
| PLAT971_ALERT_2_C | Check Calcd Resid. Dens. 0.48Ang From Na5        | 1.54    | eA-3   |
| PLAT971_ALERT_2_C | Check Calcd Resid. Dens. 0.22Ang From Na5        | 1.54    | eA-3   |
| PLAT975_ALERT_2_C | Check Calcd Resid. Dens. 1.09Ang From N01B .     | 1.38    | eA-3   |
| PLAT975_ALERT_2_C | Check Calcd Resid. Dens. 0.95Ang From C018 .     | 0.68    | eA-3   |
| PLAT976_ALERT_2_C | Check Calcd Resid. Dens. 0.55Ang From C18 .      | -0.67   | eA-3   |

---

### Alert level G

|                   |                                                      |        |       |
|-------------------|------------------------------------------------------|--------|-------|
| PLAT004_ALERT_5_G | Polymeric Structure Found with Maximum Dimension     | 2      | Info  |
| PLAT040_ALERT_1_G | No H-atoms in this Carbon Containing Compound ..     | Please | Check |
| PLAT045_ALERT_1_G | Calculated and Reported Z Differ by a Factor ...     | 0.500  | Check |
| PLAT083_ALERT_2_G | SHELXL Second Parameter in WGHT Unusually Large      | 16.14  | Why ? |
| PLAT720_ALERT_4_G | Number of Unusual/Non-Standard Labels .....          | 15     | Note  |
|                   | Dy01 N00J C00Y N00Z N013 C015 C018                   | C019   |       |
|                   | C01A N01B N01C C01E C01G C01H C01I                   |        |       |
| PLAT912_ALERT_4_G | Missing # of FCF Reflections Above STh/L= 0.600      | 5      | Note  |
| PLAT933_ALERT_2_G | Number of HKL-OMIT Records in Embedded .res File     | 4      | Note  |
|                   | 0 2 0, -1 1 1, 0 0 2, -1 2 1,                        |        |       |
| PLAT969_ALERT_5_G | The 'Henn et al.' R-Factor-gap value .....           | 5.067  | Note  |
|                   | Predicted wr2: Based on SigI**2 2.17 or SHELX Weight | 9.33   |       |

---

0 **ALERT level A** = Most likely a serious problem - resolve or explain  
3 **ALERT level B** = A potentially serious problem, consider carefully  
17 **ALERT level C** = Check. Ensure it is not caused by an omission or oversight  
8 **ALERT level G** = General information/check it is not something unexpected

3 ALERT type 1 CIF construction/syntax error, inconsistent or missing data  
10 ALERT type 2 Indicator that the structure model may be wrong or deficient  
7 ALERT type 3 Indicator that the structure quality may be low  
6 ALERT type 4 Improvement, methodology, query or suggestion  
2 ALERT type 5 Informative message, check

---

## Validation response form

Please find below a validation response form (VRF) that can be filled in and pasted into your CIF.

```
# start Validation Reply Form
_vrf_PLAT919_dymnt_031121_nbb_0m
;
PROBLEM: Reflection # Likely Affected by the Beamstop ...          1 Check
RESPONSE: ...
;
_vrf_PLAT934_dymnt_031121_nbb_0m
;
PROBLEM: Number of (Iobs-Icalc)/Sigma(W) > 10 Outliers ..        6 Check
RESPONSE: ...
;
_vrf_PLAT939_dymnt_031121_nbb_0m
;
PROBLEM: Large Value of Not (SHELXL) Weight Optimized S .        233.76 Check
RESPONSE: ...
;
# end Validation Reply Form
```

---

It is advisable to attempt to resolve as many as possible of the alerts in all categories. Often the minor alerts point to easily fixed oversights, errors and omissions in your CIF or refinement strategy, so attention to these fine details can be worthwhile. In order to resolve some of the more serious problems it may be necessary to carry out additional measurements or structure refinements. However, the purpose of your study may justify the reported deviations and the more serious of these should normally be commented upon in the discussion or experimental section of a paper or in the "special\_details" fields of the CIF. checkCIF was carefully designed to identify outliers and unusual parameters, but every test has its limitations and alerts that are not important in a particular case may appear. Conversely, the absence of alerts does not guarantee there are no aspects of the results needing attention. It is up to the individual to critically assess their own results and, if necessary, seek expert advice.

### **Publication of your CIF in IUCr journals**

A basic structural check has been run on your CIF. These basic checks will be run on all CIFs submitted for publication in IUCr journals (*Acta Crystallographica*, *Journal of Applied Crystallography*, *Journal of Synchrotron Radiation*); however, if you intend to submit to *Acta Crystallographica Section C* or *E* or *IUCrData*, you should make sure that full publication checks are run on the final version of your CIF prior to submission.

### **Publication of your CIF in other journals**

Please refer to the *Notes for Authors* of the relevant journal for any special instructions relating to CIF submission.

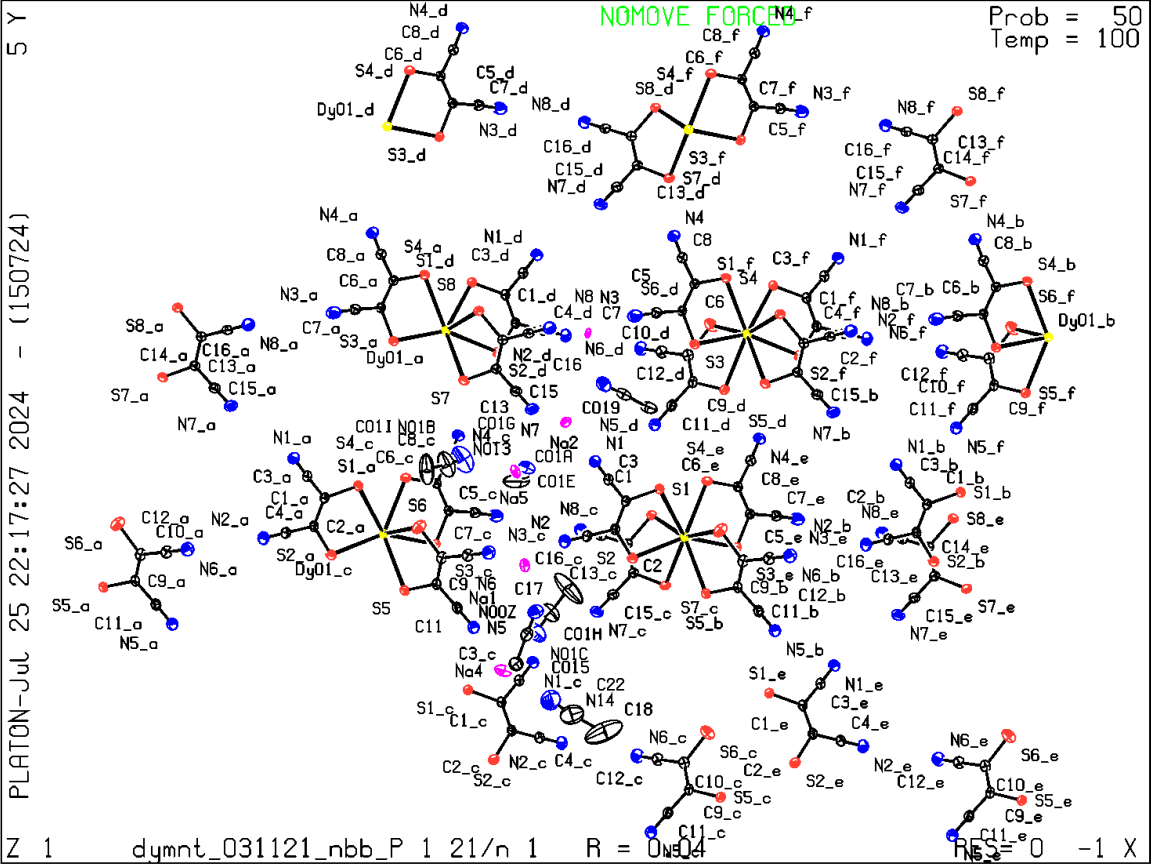

Supplement: Supplementary file 6 [file dy_beta_checkcif.pdf › finished cifs/dy_beta_checkcif.pdf]
