# Supplementary material for: Non–linear bonding trends in maleonitrile-1,2–dithiolate complexes of the transuranium actinides (An3+ = Np3+ – Cf3+ excl. Bk3+)
Source: Research Square preprint supplement (doi:10.21203/rs.3.rs-6100125/v1), 2025-03-05

## checkCIF/PLATON report

Structure factors have been supplied for datablock(s) lamnt\_0m

THIS REPORT IS FOR GUIDANCE ONLY. IF USED AS PART OF A REVIEW PROCEDURE FOR PUBLICATION, IT SHOULD NOT REPLACE THE EXPERTISE OF AN EXPERIENCED CRYSTALLOGRAPHIC REFEREE.

No syntax errors found.      CIF dictionary      Interpreting this report

### Datablock: lamnt\_0m

---

Bond precision:      C-C = 0.0023 Å      Wavelength=0.71073

Cell:                      a=36.5860 (9)      b=13.7473 (3)      c=19.4992 (5)  
                                alpha=90      beta=109.152 (1)      gamma=90

Temperature:      100 K

|                        | Calculated                                                                | Reported             |
|------------------------|---------------------------------------------------------------------------|----------------------|
| Volume                 | 9264.5 (4)                                                                | 9264.5 (4)           |
| Space group            | C 2/c                                                                     | C 1 2/c 1            |
| Hall group             | -C 2yc                                                                    | -C 2yc               |
| Moiety formula         | C64 La4 N32 S32, 22 (C<br>N0.50), 4 (C N0.50 Na),<br>2 (C1.50 N), 16 (Na) | C27.75 La N14 Na5 S8 |
| Sum formula            | C111 La4 N56 Na20 S32                                                     | C27.75 La N14 Na5 S8 |
| Mr                     | 4159.03                                                                   | 1039.76              |
| Dx, g cm <sup>-3</sup> | 1.491                                                                     | 1.491                |
| Z                      | 2                                                                         | 8                    |
| Mu (mm <sup>-1</sup> ) | 1.367                                                                     | 1.367                |
| F000                   | 4036.0                                                                    | 4036.0               |
| F000'                  | 4043.42                                                                   |                      |
| h, k, lmax             | 59, 22, 31                                                                | 59, 22, 31           |
| Nref                   | 21134                                                                     | 21096                |
| Tmin, Tmax             | 0.768, 0.872                                                              | 0.672, 0.747         |
| Tmin'                  | 0.753                                                                     |                      |

Correction method= # Reported T Limits: Tmin=0.672 Tmax=0.747  
AbsCorr = MULTI-SCAN

Data completeness= 0.998      Theta (max)= 35.474

R(reflections)= 0.0304( 18448)

wR2(reflections)=  
0.0777( 21096)

S = 1.055

Npar= 619

The following ALERTS were generated. Each ALERT has the format

**test-name\_ALERT\_alert-type\_alert-level.**

Click on the hyperlinks for more details of the test.

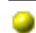

### Alert level C

PLAT042\_ALERT\_1\_C Calc. and Reported MoietyFormula Strings Differ Please Check  
Calc: C64 La4 N32 S32, 22(C N0.50), 4(C N0.50 Na), 2(C1.50 N), 16(  
Rep.: C27.75 La N14 Na5 S8

PLAT216\_ALERT\_3\_C Disordered C8# (An/Solv) ADP max/min Ratio 5.2 Note

PLAT221\_ALERT\_2\_C Solv./Anion Resd 2 C Ueq(max)/Ueq(min) Range 4.4 Ratio

PLAT241\_ALERT\_2\_C High 'MainMol' Ueq as Compared to Neighbors of S6 Check

PLAT243\_ALERT\_4\_C High 'Solvent' Ueq as Compared to Neighbors of C22 Check

PLAT244\_ALERT\_4\_C Low 'Solvent' Ueq as Compared to Neighbors of C019 Check

PLAT767\_ALERT\_4\_C INS Embedded LIST 6 Instruction Should be LIST 4 Please Check

PLAT911\_ALERT\_3\_C Missing FCF Refl Between Thmin & STh/L= 0.600 17 Report

|    |   |    |    |   |    |    |   |    |    |   |    |    |   |    |   |   |    |
|----|---|----|----|---|----|----|---|----|----|---|----|----|---|----|---|---|----|
| 3  | 1 | 0, | 4  | 0 | 0, | 5  | 1 | 0, | -3 | 1 | 1, | 1  | 1 | 1, | 6 | 2 | 1, |
| -4 | 0 | 2, | -3 | 1 | 2, | -2 | 0 | 2, | -1 | 1 | 2, | 0  | 0 | 2, | 2 | 0 | 2, |
| -4 | 2 | 3, | -3 | 1 | 3, | -4 | 0 | 4, | -9 | 1 | 6, | -4 | 0 | 6, |   |   |    |

PLAT918\_ALERT\_3\_C Reflection(s) with I(obs) much Smaller I(calc) . 3 Check

PLAT972\_ALERT\_2\_C Check Calcd Resid. Dens. 0.84Ang From S6 -1.53 eA-3

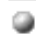

### Alert level G

PLAT004\_ALERT\_5\_G Polymeric Structure Found with Maximum Dimension 2 Info

PLAT040\_ALERT\_1\_G No H-atoms in this Carbon Containing Compound .. Please Check

PLAT045\_ALERT\_1\_G Calculated and Reported Z Differ by a Factor ... 0.250 Check

PLAT083\_ALERT\_2\_G SHELXL Second Parameter in WGHT Unusually Large 19.95 Why ?

PLAT128\_ALERT\_4\_G Alternate Setting for Input Space Group C2/c I2/a Note

PLAT299\_ALERT\_4\_G Atom Site Occupancy Constrained at ..... 0.5 Check

|      |      |     |      |      |      |      |      |
|------|------|-----|------|------|------|------|------|
| C017 | C0   | C17 | C25  | C018 | C26  | C27  | C28  |
| N9   | C18  | N18 | N19  | C20  | C21  | Na4A | Na4B |
| N20  | C23  | C24 | N01H | C01B | C01F | N21  | C01G |
| Na1A | Na1B |     |      |      |      |      |      |

PLAT302\_ALERT\_4\_G Anion/Solvent/Minor-Residue Disorder (Resd 2) 67% Note

PLAT302\_ALERT\_4\_G Anion/Solvent/Minor-Residue Disorder (Resd 3) 67% Note

PLAT302\_ALERT\_4\_G Anion/Solvent/Minor-Residue Disorder (Resd 4) 67% Note

PLAT302\_ALERT\_4\_G Anion/Solvent/Minor-Residue Disorder (Resd 5) 67% Note

PLAT302\_ALERT\_4\_G Anion/Solvent/Minor-Residue Disorder (Resd 6) 100% Note

PLAT302\_ALERT\_4\_G Anion/Solvent/Minor-Residue Disorder (Resd 8) 100% Note

PLAT302\_ALERT\_4\_G Anion/Solvent/Minor-Residue Disorder (Resd 9) 50% Note

PLAT302\_ALERT\_4\_G Anion/Solvent/Minor-Residue Disorder (Resd 10) 100% Note

PLAT432\_ALERT\_2\_G Short Inter X...Y Contact N20 ..C18 . 2.99 Ang.

1-x,1-y,1-z = 5\_666 Check

PLAT432\_ALERT\_2\_G Short Inter X...Y Contact C18 ..C23 . 3.07 Ang.

1-x,1-y,1-z = 5\_666 Check

PLAT720\_ALERT\_4\_G Number of Unusual/Non-Standard Labels ..... 14 Note

|      |      |      |      |      |      |      |      |
|------|------|------|------|------|------|------|------|
| La01 | N00H | N00Q | N016 | C017 | C018 | C019 | C01A |
| C01B | C01C | C01F | C01G | N01H | C0   |      |      |

PLAT773\_ALERT\_2\_G Check long C-C Bond in CIF: C017 --C25 1.74 Ang.

PLAT789\_ALERT\_4\_G Atoms with Negative \_atom\_site\_disorder\_group # 9 Check

```

PLAT794_ALERT_5_G Tentative Bond Valency for La01      (III)      .      3.28 Info
PLAT822_ALERT_4_G CIF-embedded .res Contains Negative PART Numbers      7 Check
PLAT910_ALERT_3_G Missing # of FCF Reflection(s) Below Theta(Min).      2 Note
      1 1 0, 2 0 0,
PLAT912_ALERT_4_G Missing # of FCF Reflections Above STh/L= 0.600      18 Note
PLAT933_ALERT_2_G Number of HKL-OMIT Records in Embedded .res File      10 Note
      1 1 1, -2 0 2, -3 1 1, -4 0 6, -3 1 3, -4 0 4,
      5 1 0, 6 2 1, -9 1 6, -4 2 3,
PLAT969_ALERT_5_G The 'Henn et al.' R-Factor-gap value .....      3.592 Note
      Predicted wR2: Based on SigI**2 2.16 or SHELX Weight 7.36

```

---

```

0 ALERT level A = Most likely a serious problem - resolve or explain
0 ALERT level B = A potentially serious problem, consider carefully
10 ALERT level C = Check. Ensure it is not caused by an omission or oversight
25 ALERT level G = General information/check it is not something unexpected

3 ALERT type 1 CIF construction/syntax error, inconsistent or missing data
8 ALERT type 2 Indicator that the structure model may be wrong or deficient
4 ALERT type 3 Indicator that the structure quality may be low
17 ALERT type 4 Improvement, methodology, query or suggestion
3 ALERT type 5 Informative message, check

```

---

It is advisable to attempt to resolve as many as possible of the alerts in all categories. Often the minor alerts point to easily fixed oversights, errors and omissions in your CIF or refinement strategy, so attention to these fine details can be worthwhile. In order to resolve some of the more serious problems it may be necessary to carry out additional measurements or structure refinements. However, the purpose of your study may justify the reported deviations and the more serious of these should normally be commented upon in the discussion or experimental section of a paper or in the "special\_details" fields of the CIF. checkCIF was carefully designed to identify outliers and unusual parameters, but every test has its limitations and alerts that are not important in a particular case may appear. Conversely, the absence of alerts does not guarantee there are no aspects of the results needing attention. It is up to the individual to critically assess their own results and, if necessary, seek expert advice.

### Publication of your CIF in IUCr journals

A basic structural check has been run on your CIF. These basic checks will be run on all CIFs submitted for publication in IUCr journals (*Acta Crystallographica*, *Journal of Applied Crystallography*, *Journal of Synchrotron Radiation*); however, if you intend to submit to *Acta Crystallographica Section C* or *E* or *IUCrData*, you should make sure that full publication checks are run on the final version of your CIF prior to submission.

### Publication of your CIF in other journals

Please refer to the *Notes for Authors* of the relevant journal for any special instructions relating to CIF submission.

PLATON version of 15/07/2024; check.def file version of 15/07/2024

Datablock lamnt\_0m - ellipsoid plot

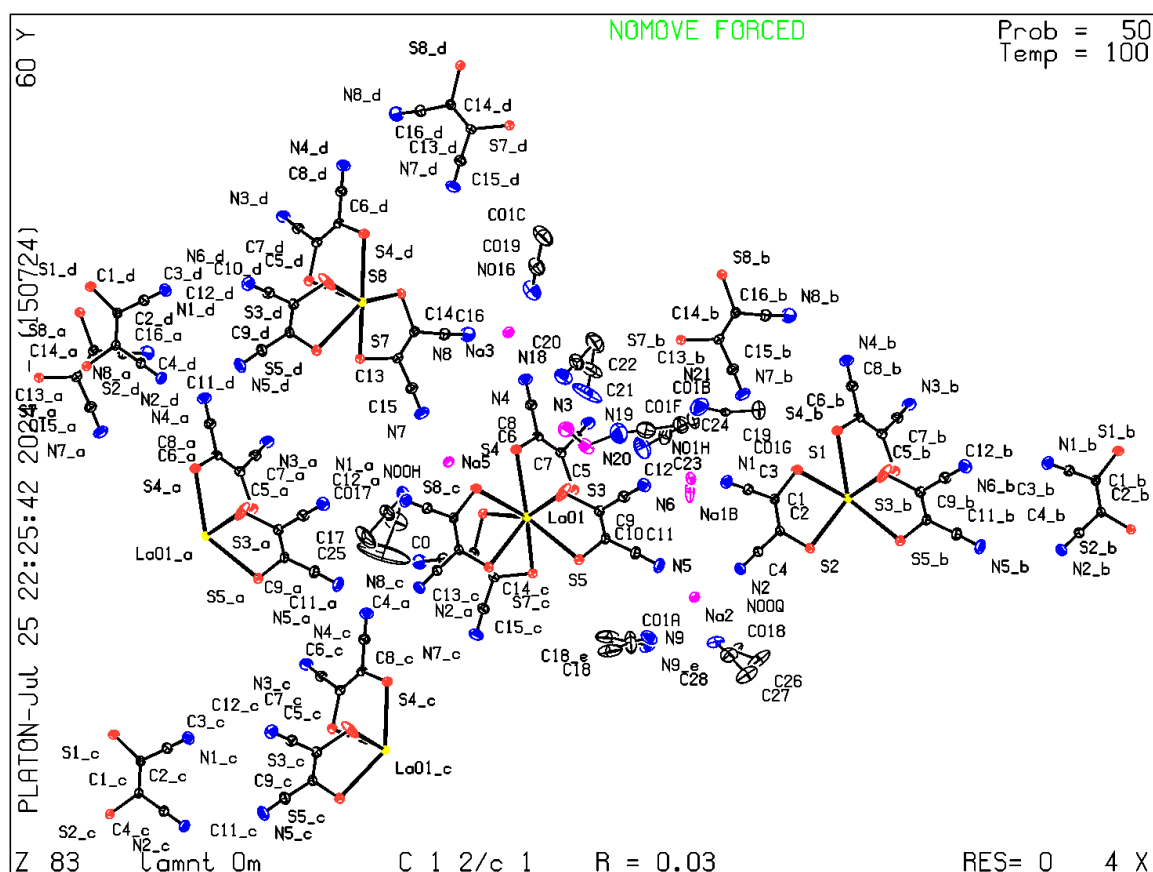

Supplement: Supplementary file 9 [file la_alpha_checkcif.pdf › finished cifs/la_alpha_checkcif.pdf]
