# Supplementary material for: Non–linear bonding trends in maleonitrile-1,2–dithiolate complexes of the transuranium actinides (An3+ = Np3+ – Cf3+ excl. Bk3+)
Source: Research Square preprint supplement (doi:10.21203/rs.3.rs-6100125/v1), 2025-03-05

## checkCIF/PLATON report

Structure factors have been supplied for datablock(s) cm\_mnt\_2\_0m

THIS REPORT IS FOR GUIDANCE ONLY. IF USED AS PART OF A REVIEW PROCEDURE FOR PUBLICATION, IT SHOULD NOT REPLACE THE EXPERTISE OF AN EXPERIENCED CRYSTALLOGRAPHIC REFEREE.

No syntax errors found.      CIF dictionary      Interpreting this report

### Datablock: cm\_mnt\_2\_0m

---

|                 |                                                                       |                                                                |
|-----------------|-----------------------------------------------------------------------|----------------------------------------------------------------|
| Bond precision: | C-C = 0.0050 A                                                        | Wavelength=0.71073                                             |
| Cell:           | a=36.2631 (14)<br>alpha=90                                            | b=13.4983 (5)<br>beta=108.573 (2)<br>c=19.4223 (8)<br>gamma=90 |
| Temperature:    | 100 K                                                                 |                                                                |
|                 | Calculated                                                            | Reported                                                       |
| Volume          | 9011.9 (6)                                                            | 9011.9 (6)                                                     |
| Space group     | C 2/c                                                                 | C 1 2/c 1                                                      |
| Hall group      | -C 2yc                                                                | -C 2yc                                                         |
| Moiety formula  | C64 Cm4 N32 S32, C3 N1.50,<br>16(C2 N), 2(C N1.33),<br>4(C1.15 N0.40) | C27.25 Cm N13.792 Na5 S8                                       |
| Sum formula     | C109 Cm4 N55.17 Na20 S32                                              | C27.25 Cm N13.79 Na5 S8                                        |
| Mr              | 4543.93                                                               | 1135.92                                                        |
| Dx, g cm-3      | 1.675                                                                 | 1.674                                                          |
| Z               | 2                                                                     | 8                                                              |
| Mu (mm-1)       | 2.265                                                                 | 2.265                                                          |
| F000            | 4312.3                                                                | 4312.0                                                         |
| F000'           | 4263.42                                                               |                                                                |
| h, k, lmax      | 60, 22, 32                                                            | 60, 22, 32                                                     |
| Nref            | 21984                                                                 | 21956                                                          |
| Tmin, Tmax      | 0.642, 0.797                                                          | 0.646, 0.747                                                   |
| Tmin'           | 0.629                                                                 |                                                                |

Correction method= # Reported T Limits: Tmin=0.646 Tmax=0.747  
AbsCorr = MULTI-SCAN

Data completeness= 0.999      Theta (max)= 36.400

R(reflections)= 0.0322( 18441)

wR2(reflections)=  
0.0783( 21956)

S = 1.036

Npar= 591

The following ALERTS were generated. Each ALERT has the format

**test-name\_ALERT\_alert-type\_alert-level.**

Click on the hyperlinks for more details of the test.

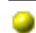

### Alert level C

PLAT042\_ALERT\_1\_C Calc. and Reported MoietyFormula Strings Differ Please Check  
Calc: C64 Cm4 N32 S32, C3 N1.50, 16(C2 N), 2(C N1.33), 4(C1.15 N0.  
Rep.: C27.25 Cm N13.792 Na5 S8

PLAT214\_ALERT\_2\_C Atom C24 (Anion/Solvent) ADP max/min Ratio 4.2 prolat

PLAT243\_ALERT\_4\_C High 'Solvent' Ueq as Compared to Neighbors of C01E Check

PLAT244\_ALERT\_4\_C Low 'Solvent' Ueq as Compared to Neighbors of N013 Check

PLAT244\_ALERT\_4\_C Low 'Solvent' Ueq as Compared to Neighbors of C017 Check

PLAT244\_ALERT\_4\_C Low 'Solvent' Ueq as Compared to Neighbors of C019 Check

PLAT260\_ALERT\_2\_C Large Average Ueq of Residue Including N10 0.117 Check

PLAT260\_ALERT\_2\_C Large Average Ueq of Residue Including N013 0.160 Check

PLAT260\_ALERT\_2\_C Large Average Ueq of Residue Including N00Q 0.104 Check

PLAT260\_ALERT\_2\_C Large Average Ueq of Residue Including N014 0.148 Check

PLAT260\_ALERT\_2\_C Large Average Ueq of Residue Including C19 0.133 Check

PLAT329\_ALERT\_4\_C Carbon Atom Hybridisation Unclear for ..... C21 Check

PLAT911\_ALERT\_3\_C Missing FCF Refl Between Thmin & STh/L= 0.600 7 Report

-3 1 1, 1 1 1, -8 0 2, -2 0 2, 0 0 2, -3 1 3,  
-4 0 4,

PLAT971\_ALERT\_2\_C Check Calcd Resid. Dens. 0.62Ang From Cm01 2.44 eA-3

PLAT971\_ALERT\_2\_C Check Calcd Resid. Dens. 0.78Ang From Na4A 1.77 eA-3

PLAT971\_ALERT\_2\_C Check Calcd Resid. Dens. 0.82Ang From Cm01 1.69 eA-3

PLAT971\_ALERT\_2\_C Check Calcd Resid. Dens. 0.65Ang From Na5 1.53 eA-3

PLAT972\_ALERT\_2\_C Check Calcd Resid. Dens. 0.30Ang From Na4A -1.76 eA-3

PLAT973\_ALERT\_2\_C Check Calcd Positive Resid. Density on Na4A 1.49 eA-3

PLAT973\_ALERT\_2\_C Check Calcd Positive Resid. Density on Cm01 1.24 eA-3

PLAT973\_ALERT\_2\_C Check Calcd Positive Resid. Density on Na5 1.06 eA-3

PLAT975\_ALERT\_2\_C Check Calcd Resid. Dens. 0.95Ang From C27 . 1.05 eA-3

PLAT975\_ALERT\_2\_C Check Calcd Resid. Dens. 0.70Ang From C19 . 1.03 eA-3

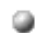

### Alert level G

PLAT003\_ALERT\_2\_G Number of Uiso or U(i,j) Restrained non-H Atoms 4 Report

PLAT004\_ALERT\_5\_G Polymeric Structure Found with Maximum Dimension 2 Info

PLAT040\_ALERT\_1\_G No H-atoms in this Carbon Containing Compound .. Please Check

PLAT045\_ALERT\_1\_G Calculated and Reported Z Differ by a Factor ... 0.250 Check

PLAT068\_ALERT\_1\_G Reported F000 Differs from Calcd (or Missing)... Please Check

PLAT083\_ALERT\_2\_G SHELXL Second Parameter in WGHT Unusually Large 31.56 Why ?

PLAT128\_ALERT\_4\_G Alternate Setting for Input Space Group C2/c I2/a Note

PLAT171\_ALERT\_4\_G The CIF-Embedded .res File Contains EADP Records 1 Report

PLAT186\_ALERT\_4\_G The CIF-Embedded .res File Contains ISOR Records 1 Report

PLAT299\_ALERT\_4\_G Atom Site Occupancy Constrained at ..... 0.5 Check

C18 C22 C23 C25 N01F N01G C01A C01B

C19 Na4A Na4B

PLAT300\_ALERT\_4\_G Atom Site Occupancy of N10 Constrained at 0.75 Check

PLAT300\_ALERT\_4\_G Atom Site Occupancy of C21 Constrained at 0.75 Check

PLAT300\_ALERT\_4\_G Atom Site Occupancy of C24 Constrained at 0.375 Check

|                   |                                                  |                |        |       |
|-------------------|--------------------------------------------------|----------------|--------|-------|
| PLAT300_ALERT_4_G | Atom Site Occupancy of N17                       | Constrained at | 0.6666 | Check |
| PLAT300_ALERT_4_G | Atom Site Occupancy of N33                       | Constrained at | 0.3333 | Check |
| PLAT300_ALERT_4_G | Atom Site Occupancy of C27                       | Constrained at | 0.75   | Check |
| PLAT300_ALERT_4_G | Atom Site Occupancy of N9                        | Constrained at | 0.4    | Check |
| PLAT300_ALERT_4_G | Atom Site Occupancy of C17                       | Constrained at | 0.4    | Check |
| PLAT300_ALERT_4_G | Atom Site Occupancy of N11                       | Constrained at | 0.35   | Check |
| PLAT300_ALERT_4_G | Atom Site Occupancy of C20                       | Constrained at | 0.35   | Check |
| PLAT300_ALERT_4_G | Atom Site Occupancy of Na1A                      | Constrained at | 0.75   | Check |
| PLAT300_ALERT_4_G | Atom Site Occupancy of Na1B                      | Constrained at | 0.25   | Check |
| PLAT302_ALERT_4_G | Anion/Solvent/Minor-Residue Disorder (Resd 2)    |                | 100%   | Note  |
| PLAT302_ALERT_4_G | Anion/Solvent/Minor-Residue Disorder (Resd 3)    |                | 67%    | Note  |
| PLAT302_ALERT_4_G | Anion/Solvent/Minor-Residue Disorder (Resd 4)    |                | 67%    | Note  |
| PLAT302_ALERT_4_G | Anion/Solvent/Minor-Residue Disorder (Resd 5)    |                | 67%    | Note  |
| PLAT302_ALERT_4_G | Anion/Solvent/Minor-Residue Disorder (Resd 8)    |                | 100%   | Note  |
| PLAT302_ALERT_4_G | Anion/Solvent/Minor-Residue Disorder (Resd 9)    |                | 100%   | Note  |
| PLAT302_ALERT_4_G | Anion/Solvent/Minor-Residue Disorder (Resd 10)   |                | 100%   | Note  |
| PLAT302_ALERT_4_G | Anion/Solvent/Minor-Residue Disorder (Resd 11)   |                | 100%   | Note  |
| PLAT302_ALERT_4_G | Anion/Solvent/Minor-Residue Disorder (Resd 14)   |                | 100%   | Note  |
| PLAT302_ALERT_4_G | Anion/Solvent/Minor-Residue Disorder (Resd 15)   |                | 100%   | Note  |
| PLAT302_ALERT_4_G | Anion/Solvent/Minor-Residue Disorder (Resd 17)   |                | 100%   | Note  |
| PLAT432_ALERT_2_G | Short Inter X...Y Contact N17 ..C19              | .              | 2.48   | Ang.  |
|                   | x,y,z =                                          |                | 1_555  | Check |
| PLAT432_ALERT_2_G | Short Inter X...Y Contact N17 ..C19              | .              | 2.48   | Ang.  |
|                   | 1-x,y,1/2-z =                                    |                | 2_655  | Check |
| PLAT432_ALERT_2_G | Short Inter X...Y Contact C019 ..C18             | .              | 2.81   | Ang.  |
|                   | x,1-y,-1/2+z =                                   |                | 6_565  | Check |
| PLAT432_ALERT_2_G | Short Inter X...Y Contact C01D ..C18             | .              | 2.75   | Ang.  |
|                   | x,1-y,-1/2+z =                                   |                | 6_565  | Check |
| PLAT432_ALERT_2_G | Short Inter X...Y Contact C01E ..C19             | .              | 1.90   | Ang.  |
|                   | x,y,z =                                          |                | 1_555  | Check |
| PLAT432_ALERT_2_G | Short Inter X...Y Contact C01E ..C19             | .              | 1.90   | Ang.  |
|                   | 1-x,y,1/2-z =                                    |                | 2_655  | Check |
| PLAT432_ALERT_2_G | Short Inter X...Y Contact C19 ..N33              | .              | 1.73   | Ang.  |
|                   | 1-x,y,1/2-z =                                    |                | 2_655  | Check |
| PLAT432_ALERT_2_G | Short Inter X...Y Contact C19 ..N11              | .              | 2.56   | Ang.  |
|                   | 1-x,y,1/2-z =                                    |                | 2_655  | Check |
| PLAT432_ALERT_2_G | Short Inter X...Y Contact C19 ..C20              | .              | 2.71   | Ang.  |
|                   | 1-x,y,1/2-z =                                    |                | 2_655  | Check |
| PLAT432_ALERT_2_G | Short Inter X...Y Contact C19 ..N33              | .              | 3.01   | Ang.  |
|                   | x,y,z =                                          |                | 1_555  | Check |
| PLAT432_ALERT_2_G | Short Inter X...Y Contact C25 ..C26              | .              | 2.98   | Ang.  |
|                   | x,1-y,1/2+z =                                    |                | 6_566  | Check |
| PLAT432_ALERT_2_G | Short Inter X...Y Contact C27 ..C20              | .              | 1.81   | Ang.  |
|                   | x,y,z =                                          |                | 1_555  | Check |
| PLAT432_ALERT_2_G | Short Inter X...Y Contact C27 ..N11              | .              | 2.96   | Ang.  |
|                   | x,y,z =                                          |                | 1_555  | Check |
| PLAT720_ALERT_4_G | Number of Unusual/Non-Standard Labels .....      |                | 13     | Note  |
|                   | Cm01 N00Q N013 N014 C017 C018 C019 C01A          |                |        |       |
|                   | C01D C01E N01F N01G C01B                         |                |        |       |
| PLAT773_ALERT_2_G | Check long C-C Bond in CIF: C01E --C19           |                | 1.90   | Ang.  |
| PLAT773_ALERT_2_G | Check long C-C Bond in CIF: C01E --C19           |                | 1.90   | Ang.  |
| PLAT773_ALERT_2_G | Check long C-C Bond in CIF: C27 --C20            |                | 1.80   | Ang.  |
| PLAT789_ALERT_4_G | Atoms with Negative _atom_site_disorder_group #  |                | 6      | Check |
| PLAT822_ALERT_4_G | CIF-embedded .res Contains Negative PART Numbers |                | 5      | Check |
| PLAT860_ALERT_3_G | Number of Least-Squares Restraints .....         |                | 24     | Note  |
| PLAT910_ALERT_3_G | Missing # of FCF Reflection(s) Below Theta(Min). |                | 2      | Note  |
|                   | 1 1 0, 2 0 0,                                    |                |        |       |

|                   |                                                  |                                 |        |       |
|-------------------|--------------------------------------------------|---------------------------------|--------|-------|
| PLAT912_ALERT_4_G | Missing # of FCF Reflections Above STh/L=        | 0.600                           | 19     | Note  |
| PLAT933_ALERT_2_G | Number of HKL-OMIT Records in Embedded .res File |                                 | 4      | Note  |
|                   | 1 1 1, -4 0 4, -8 0 2, -3 1 3,                   |                                 |        |       |
| PLAT941_ALERT_3_G | Average HKL Measurement Multiplicity .....       |                                 | 4.3    | Low   |
| PLAT969_ALERT_5_G | The 'Henn et al.' R-Factor-gap value .....       |                                 | 1.910  | Note  |
|                   | Predicted wR2: Based on SigI**2                  | 4.11 or SHELX Weight            | 7.56   |       |
| PLAT983_ALERT_1_G | The Cm-f"=                                       | 4.8980 Deviates from IT-Value = | 4.6980 | Check |

---

0 **ALERT level A** = Most likely a serious problem - resolve or explain  
0 **ALERT level B** = A potentially serious problem, consider carefully  
23 **ALERT level C** = Check. Ensure it is not caused by an omission or oversight  
59 **ALERT level G** = General information/check it is not something unexpected

5 ALERT type 1 CIF construction/syntax error, inconsistent or missing data  
35 ALERT type 2 Indicator that the structure model may be wrong or deficient  
4 ALERT type 3 Indicator that the structure quality may be low  
36 ALERT type 4 Improvement, methodology, query or suggestion  
2 ALERT type 5 Informative message, check

---

It is advisable to attempt to resolve as many as possible of the alerts in all categories. Often the minor alerts point to easily fixed oversights, errors and omissions in your CIF or refinement strategy, so attention to these fine details can be worthwhile. In order to resolve some of the more serious problems it may be necessary to carry out additional measurements or structure refinements. However, the purpose of your study may justify the reported deviations and the more serious of these should normally be commented upon in the discussion or experimental section of a paper or in the "special\_details" fields of the CIF. checkCIF was carefully designed to identify outliers and unusual parameters, but every test has its limitations and alerts that are not important in a particular case may appear. Conversely, the absence of alerts does not guarantee there are no aspects of the results needing attention. It is up to the individual to critically assess their own results and, if necessary, seek expert advice.

### Publication of your CIF in IUCr journals

A basic structural check has been run on your CIF. These basic checks will be run on all CIFs submitted for publication in IUCr journals (*Acta Crystallographica*, *Journal of Applied Crystallography*, *Journal of Synchrotron Radiation*); however, if you intend to submit to *Acta Crystallographica Section C* or *E* or *IUCrData*, you should make sure that full publication checks are run on the final version of your CIF prior to submission.

### Publication of your CIF in other journals

Please refer to the *Notes for Authors* of the relevant journal for any special instructions relating to CIF submission.

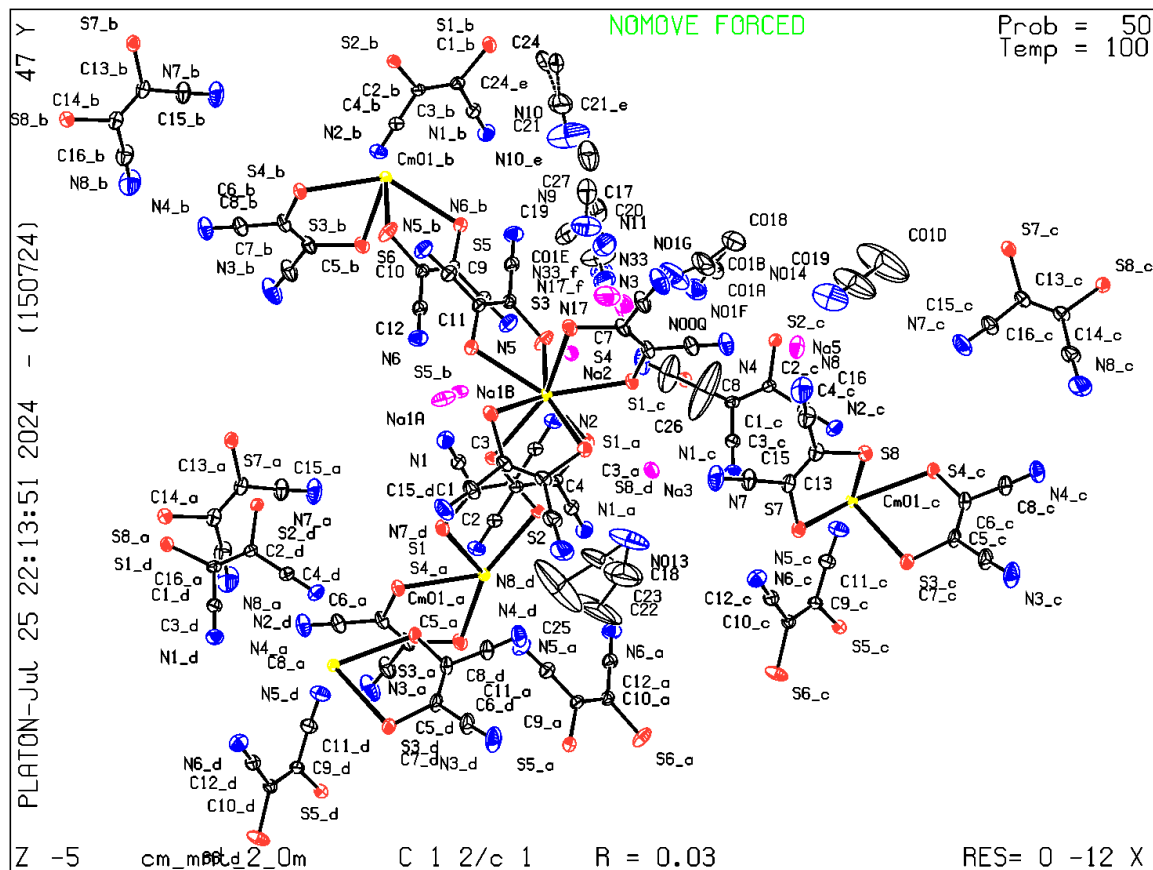

Supplement: Supplementary file 4 [file cm_alpha_checkcif.pdf › finished cifs/cm_alpha_checkcif.pdf]
