# Supplementary material for: Non–linear bonding trends in maleonitrile-1,2–dithiolate complexes of the transuranium actinides (An3+ = Np3+ – Cf3+ excl. Bk3+)
Source: Research Square preprint supplement (doi:10.21203/rs.3.rs-6100125/v1), 2025-03-05

## checkCIF/PLATON report

Structure factors have been supplied for datablock(s) npmnt\_0m

THIS REPORT IS FOR GUIDANCE ONLY. IF USED AS PART OF A REVIEW PROCEDURE FOR PUBLICATION, IT SHOULD NOT REPLACE THE EXPERTISE OF AN EXPERIENCED CRYSTALLOGRAPHIC REFEREE.

No syntax errors found.      CIF dictionary      Interpreting this report

### Datablock: npmnt\_0m

---

Bond precision:      C-C = 0.0069 Å      Wavelength=0.71073

Cell:                      a=14.0465(4)      b=18.5992(5)      c=18.0751(5)  
                                alpha=90      beta=91.711(1)      gamma=90

Temperature:      100 K

|                        | Calculated                                            | Reported         |
|------------------------|-------------------------------------------------------|------------------|
| Volume                 | 4720.1(2)                                             | 4720.1(2)        |
| Space group            | P 21/n                                                | P 1 21/n 1       |
| Hall group             | -P 2yn                                                | -P 2yn           |
| Moiety formula         | C32 N16 Np2 S16, 2(C0.96 K N0.48), 11.044(C2 N), 8(K) | C28 K5 N14 Np S8 |
| Sum formula            | C56 K10 N28 Np2 S16                                   | C28 K5 N14 Np S8 |
| Mr                     | 2442.90                                               | 1221.40          |
| Dx, g cm <sup>-3</sup> | 1.719                                                 | 1.719            |
| Z                      | 2                                                     | 4                |
| Mu (mm <sup>-1</sup> ) | 3.034                                                 | 3.034            |
| F000                   | 2328.0                                                | 2328.0           |
| F000'                  | 2290.34                                               |                  |
| h,k,lmax               | 23,31,30                                              | 23,30,30         |
| Nref                   | 22904                                                 | 22697            |
| Tmin,Tmax              | 0.515,0.579                                           | 0.651,0.810      |
| Tmin'                  | 0.494                                                 |                  |

Correction method= # Reported T Limits: Tmin=0.651 Tmax=0.810  
AbsCorr = MULTI-SCAN

Data completeness= 0.991      Theta(max)= 36.339

R(reflections)= 0.0425( 17936)

wR2(reflections)=  
0.1144( 22697)

S = 1.065

Npar= 533

---

The following ALERTS were generated. Each ALERT has the format

**test-name\_ALERT\_alert-type\_alert-level.**

Click on the hyperlinks for more details of the test.

---

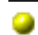

### Alert level C

CRYSC01\_ALERT\_1\_C The word below has not been recognised as a standard identifier.  
bluish

PLAT042\_ALERT\_1\_C Calc. and Reported MoietyFormula Strings Differ Please Check  
Calc: C32 N16 Np2 S16, 2(C0.96 K N0.48), 11.044(C2 N), 8(K)  
Rep.: C28 K5 N14 Np S8

PLAT244\_ALERT\_4\_C Low 'Solvent' Ueq as Compared to Neighbors of C010 Check  
PLAT244\_ALERT\_4\_C Low 'Solvent' Ueq as Compared to Neighbors of C01F Check  
PLAT260\_ALERT\_2\_C Large Average Ueq of Residue Including N9 0.145 Check  
PLAT260\_ALERT\_2\_C Large Average Ueq of Residue Including N21 0.172 Check  
PLAT723\_ALERT\_1\_C Torsion Calc -119.00, Rep -121(21) Dev... 2.00 Sigma  
C0 -C017-C01B-N01B 1\_555 1\_555 1\_555 1\_555 # 98 Check  
PLAT767\_ALERT\_4\_C INS Embedded LIST 6 Instruction Should be LIST 4 Please Check  
PLAT906\_ALERT\_3\_C Large K Value in the Analysis of Variance ..... 3.279 Check  
PLAT911\_ALERT\_3\_C Missing FCF Refl Between Thmin & STh/L= 0.600 22 Report  
0 2 0, 1 2 0, 1 0 1, -1 1 1, 1 1 1, 2 1 1,  
0 2 1, 1 2 1, -1 3 1, 0 0 2, 2 0 2, -3 1 2,  
0 1 2, -1 2 2, 3 3 2, -3 2 3, 1 3 3, -2 0 4,  
2 1 4, -1 2 5, -1 1 6, -1 0 7,

PLAT918\_ALERT\_3\_C Reflection(s) with I(obs) much Smaller I(calc) . 1 Check  
PLAT934\_ALERT\_3\_C Number of (Iobs-Icalc)/Sigma(W) > 10 Outliers .. 1 Check  
0 2 2,

PLAT971\_ALERT\_2\_C Check Calcd Resid. Dens. 0.93Ang From K4 1.66 eA-3  
PLAT971\_ALERT\_2\_C Check Calcd Resid. Dens. 1.23Ang From N019 1.63 eA-3  
PLAT972\_ALERT\_2\_C Check Calcd Resid. Dens. 0.63Ang From K4 -2.43 eA-3  
PLAT972\_ALERT\_2\_C Check Calcd Resid. Dens. 0.29Ang From K4 -1.93 eA-3  
PLAT972\_ALERT\_2\_C Check Calcd Resid. Dens. 0.61Ang From K2 -1.75 eA-3  
PLAT972\_ALERT\_2\_C Check Calcd Resid. Dens. 0.67Ang From K1 -1.73 eA-3  
PLAT972\_ALERT\_2\_C Check Calcd Resid. Dens. 0.54Ang From K2 -1.72 eA-3  
PLAT972\_ALERT\_2\_C Check Calcd Resid. Dens. 0.44Ang From K2 -1.61 eA-3  
PLAT975\_ALERT\_2\_C Check Calcd Resid. Dens. 0.82Ang From N9 . 0.98 eA-3  
PLAT975\_ALERT\_2\_C Check Calcd Resid. Dens. 0.74Ang From N00K . 0.54 eA-3

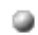

### Alert level G

PLAT002\_ALERT\_2\_G Number of Distance or Angle Restraints on AtSite 9 Note  
PLAT003\_ALERT\_2\_G Number of Uiso or U(i,j) Restrained non-H Atoms 9 Report  
PLAT004\_ALERT\_5\_G Polymeric Structure Found with Maximum Dimension 2 Info  
PLAT040\_ALERT\_1\_G No H-atoms in this Carbon Containing Compound .. Please Check  
PLAT045\_ALERT\_1\_G Calculated and Reported Z Differ by a Factor ... 0.500 Check  
PLAT083\_ALERT\_2\_G SHELXL Second Parameter in WGHT Unusually Large 9.63 Why ?  
PLAT172\_ALERT\_4\_G The CIF-Embedded .res File Contains DFIX Records 4 Report  
PLAT176\_ALERT\_4\_G The CIF-Embedded .res File Contains SADI Records 3 Report  
PLAT186\_ALERT\_4\_G The CIF-Embedded .res File Contains ISOR Records 2 Report  
PLAT191\_ALERT\_3\_G A Non-default SADI Restraint Value has been used 0.0400 Report  
PLAT302\_ALERT\_4\_G Anion/Solvent/Minor-Residue Disorder (Resd 2) 59% Note  
PLAT302\_ALERT\_4\_G Anion/Solvent/Minor-Residue Disorder (Resd 6) 100% Note  
PLAT720\_ALERT\_4\_G Number of Unusual/Non-Standard Labels ..... 17 Note  
Np01 N00K N00R C010 C015 C017 C018 N019  
C01A N01B C01C C01D C01E C01F C01B C0

N01C

|                                                                    |       |       |
|--------------------------------------------------------------------|-------|-------|
| PLAT789_ALERT_4_G Atoms with Negative _atom_site_disorder_group #  | 3     | Check |
| PLAT822_ALERT_4_G CIF-embedded .res Contains Negative PART Numbers | 1     | Check |
| PLAT860_ALERT_3_G Number of Least-Squares Restraints .....         | 63    | Note  |
| PLAT910_ALERT_3_G Missing # of FCF Reflection(s) Below Theta(Min). | 2     | Note  |
| -1 0 1, 0 1 1,                                                     |       |       |
| PLAT912_ALERT_4_G Missing # of FCF Reflections Above STh/L= 0.600  | 183   | Note  |
| PLAT913_ALERT_3_G Missing # of Very Strong Reflections in FCF .... | 2     | Note  |
| -2 0 4, 2 1 4,                                                     |       |       |
| PLAT933_ALERT_2_G Number of HKL-OMIT Records in Embedded .res File | 15    | Note  |
| 0 2 0, 0 0 2, -1 1 1, 0 2 1, -1 2 5, 2 1 1,                        |       |       |
| -3 1 2, 3 3 2, -1 2 2, -1 3 1, 1 3 3, -3 2 3,                      |       |       |
| -1 0 7, 2 0 2, -1 1 6,                                             |       |       |
| PLAT941_ALERT_3_G Average HKL Measurement Multiplicity .....       | 4.8   | Low   |
| PLAT969_ALERT_5_G The 'Henn et al.' R-Factor-gap value .....       | 3.652 | Note  |
| Predicted wR2: Based on SigI**2 3.13 or SHELX Weight 10.74         |       |       |

---

0 **ALERT level A** = Most likely a serious problem - resolve or explain  
0 **ALERT level B** = A potentially serious problem, consider carefully  
22 **ALERT level C** = Check. Ensure it is not caused by an omission or oversight  
22 **ALERT level G** = General information/check it is not something unexpected

5 ALERT type 1 CIF construction/syntax error, inconsistent or missing data  
16 ALERT type 2 Indicator that the structure model may be wrong or deficient  
9 ALERT type 3 Indicator that the structure quality may be low  
12 ALERT type 4 Improvement, methodology, query or suggestion  
2 ALERT type 5 Informative message, check

---



---

It is advisable to attempt to resolve as many as possible of the alerts in all categories. Often the minor alerts point to easily fixed oversights, errors and omissions in your CIF or refinement strategy, so attention to these fine details can be worthwhile. In order to resolve some of the more serious problems it may be necessary to carry out additional measurements or structure refinements. However, the purpose of your study may justify the reported deviations and the more serious of these should normally be commented upon in the discussion or experimental section of a paper or in the "special\_details" fields of the CIF. checkCIF was carefully designed to identify outliers and unusual parameters, but every test has its limitations and alerts that are not important in a particular case may appear. Conversely, the absence of alerts does not guarantee there are no aspects of the results needing attention. It is up to the individual to critically assess their own results and, if necessary, seek expert advice.

### **Publication of your CIF in IUCr journals**

A basic structural check has been run on your CIF. These basic checks will be run on all CIFs submitted for publication in IUCr journals (*Acta Crystallographica*, *Journal of Applied Crystallography*, *Journal of Synchrotron Radiation*); however, if you intend to submit to *Acta Crystallographica Section C* or *E* or *IUCrData*, you should make sure that full publication checks are run on the final version of your CIF prior to submission.

### **Publication of your CIF in other journals**

Please refer to the *Notes for Authors* of the relevant journal for any special instructions relating to CIF submission.

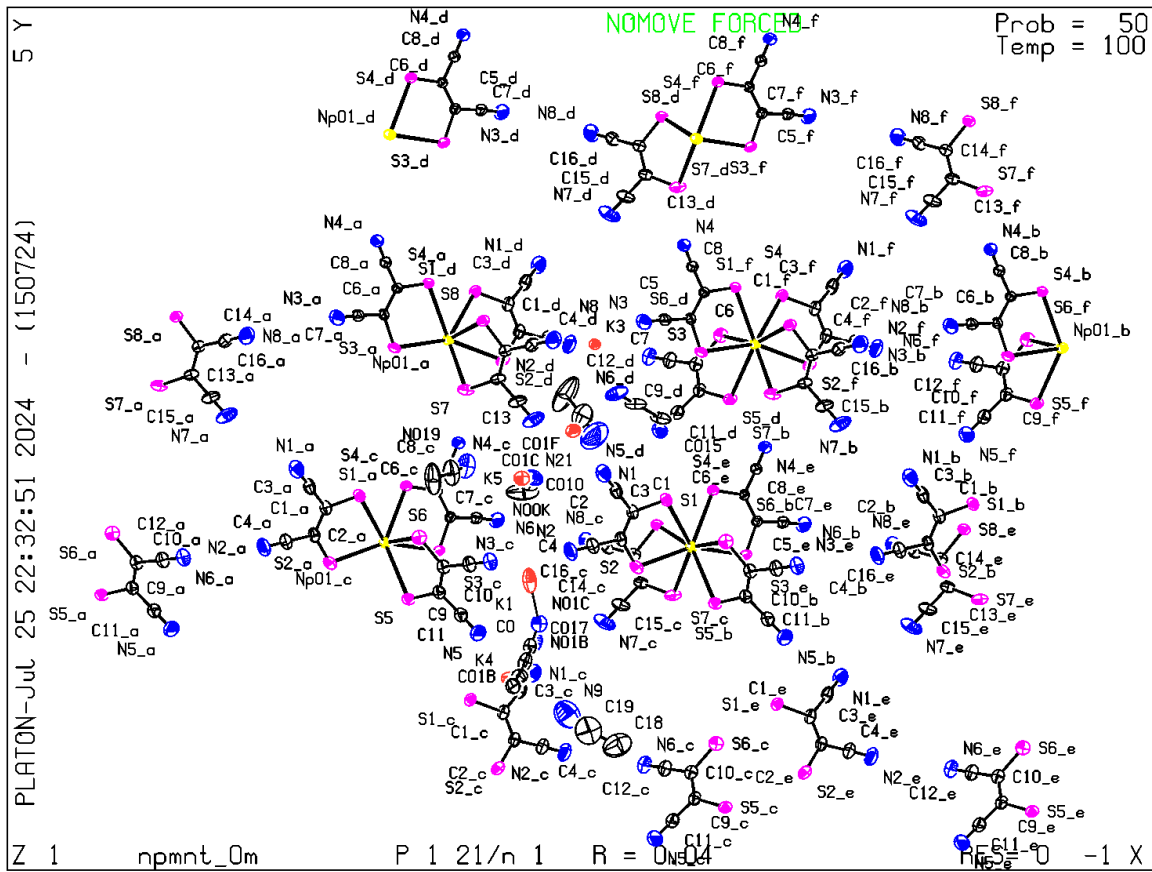

Supplement: Supplementary file 11 [file np_beta_checkcif.pdf › finished cifs/np_beta_checkcif.pdf]
