# Supplementary material for: Non–linear bonding trends in maleonitrile-1,2–dithiolate complexes of the transuranium actinides (An3+ = Np3+ – Cf3+ excl. Bk3+)
Source: Research Square preprint supplement (doi:10.21203/rs.3.rs-6100125/v1), 2025-03-05

## checkCIF/PLATON report

Structure factors have been supplied for datablock(s) cm\_mnt\_0m

THIS REPORT IS FOR GUIDANCE ONLY. IF USED AS PART OF A REVIEW PROCEDURE FOR PUBLICATION, IT SHOULD NOT REPLACE THE EXPERTISE OF AN EXPERIENCED CRYSTALLOGRAPHIC REFEREE.

No syntax errors found.      CIF dictionary      Interpreting this report

### Datablock: cm\_mnt\_0m

---

Bond precision:      C-C = 0.0086 Å      Wavelength=0.71073

Cell:                      a=13.7182(5)      b=18.3443(7)      c=17.4906(6)  
                                alpha=90      beta=92.414(1)      gamma=90

Temperature:      100 K

|                        | Calculated                           | Reported          |
|------------------------|--------------------------------------|-------------------|
| Volume                 | 4397.6(3)                            | 4397.6(3)         |
| Space group            | P 21/n                               | P 1 21/n 1        |
| Hall group             | -P 2yn                               | -P 2yn            |
| Moiety formula         | C32 Cm2 N16 S16, 12(C2 N),<br>10(Na) | C28 Cm N14 Na5 S8 |
| Sum formula            | C56 Cm2 N28 Na10 S16                 | C28 Cm N14 Na5 S8 |
| Mr                     | 2295.82                              | 1147.85           |
| Dx, g cm <sup>-3</sup> | 1.734                                | 1.734             |
| Z                      | 2                                    | 4                 |
| Mu (mm <sup>-1</sup> ) | 2.322                                | 2.322             |
| F000                   | 2180.0                               | 2180.0            |
| F000'                  | 2155.55                              |                   |
| h,k,lmax               | 21,28,26                             | 21,28,26          |
| Nref                   | 16878                                | 16847             |
| Tmin,Tmax              | 0.677,0.846                          | 0.614,0.747       |
| Tmin'                  | 0.664                                |                   |

Correction method= # Reported T Limits: Tmin=0.614 Tmax=0.747  
AbsCorr = MULTI-SCAN

Data completeness= 0.998      Theta(max)= 33.233

R(reflections)= 0.0390( 13676)

wR2(reflections)=  
0.0878( 16847)

S = 1.069

Npar= 505

---

The following ALERTS were generated. Each ALERT has the format

**test-name\_ALERT\_alert-type\_alert-level.**

Click on the hyperlinks for more details of the test.

---

### Alert level B

PLAT976\_ALERT\_2\_B Check Calcd Resid. Dens. 1.04Ang From C28 . -1.80 eA-3

---

### Alert level C

PLAT042\_ALERT\_1\_C Calc. and Reported MoietyFormula Strings Differ Please Check  
Calc: C32 Cm2 N16 S16, 12(C2 N), 10(Na)  
Rep.: C28 Cm N14 Na5 S8

PLAT244\_ALERT\_4\_C Low 'Solvent' Ueq as Compared to Neighbors of C19 Check  
PLAT244\_ALERT\_4\_C Low 'Solvent' Ueq as Compared to Neighbors of C21 Check  
PLAT244\_ALERT\_4\_C Low 'Solvent' Ueq as Compared to Neighbors of C25 Check  
PLAT244\_ALERT\_4\_C Low 'Solvent' Ueq as Compared to Neighbors of C27 Check  
PLAT260\_ALERT\_2\_C Large Average Ueq of Residue Including N10 0.128 Check  
PLAT260\_ALERT\_2\_C Large Average Ueq of Residue Including N13 0.128 Check  
PLAT260\_ALERT\_2\_C Large Average Ueq of Residue Including N14 0.158 Check  
PLAT342\_ALERT\_3\_C Low Bond Precision on C-C Bonds ..... 0.00861 Ang.  
PLAT906\_ALERT\_3\_C Large K Value in the Analysis of Variance ..... 2.341 Check  
PLAT911\_ALERT\_3\_C Missing FCF Refl Between Thmin & STh/L= 0.600 2 Report  
0 2 0, 1 0 1,

PLAT934\_ALERT\_3\_C Number of (Iobs-Icalc)/Sigma(W) > 10 Outliers .. 1 Check  
-1 2 2,

PLAT971\_ALERT\_2\_C Check Calcd Resid. Dens. 0.61Ang From Cm1 1.74 eA-3  
PLAT971\_ALERT\_2\_C Check Calcd Resid. Dens. 0.41Ang From N10 1.61 eA-3  
PLAT971\_ALERT\_2\_C Check Calcd Resid. Dens. 0.70Ang From Cm1 1.56 eA-3  
PLAT972\_ALERT\_2\_C Check Calcd Resid. Dens. 1.04Ang From C28 -1.80 eA-3  
PLAT973\_ALERT\_2\_C Check Calcd Positive Resid. Density on Cm1 1.23 eA-3  
PLAT975\_ALERT\_2\_C Check Calcd Resid. Dens. 0.95Ang From N10 . 1.11 eA-3  
PLAT975\_ALERT\_2\_C Check Calcd Resid. Dens. 0.93Ang From C28 . 1.05 eA-3  
PLAT975\_ALERT\_2\_C Check Calcd Resid. Dens. 0.89Ang From C28 . 0.73 eA-3

---

### Alert level G

PLAT004\_ALERT\_5\_G Polymeric Structure Found with Maximum Dimension 2 Info  
PLAT040\_ALERT\_1\_G No H-atoms in this Carbon Containing Compound .. Please Check  
PLAT045\_ALERT\_1\_G Calculated and Reported Z Differ by a Factor ... 0.500 Check  
PLAT083\_ALERT\_2\_G SHELXL Second Parameter in WGHT Unusually Large 18.10 Why ?  
PLAT910\_ALERT\_3\_G Missing # of FCF Reflection(s) Below Theta(Min). 1 Note  
0 1 1,

PLAT912\_ALERT\_4\_G Missing # of FCF Reflections Above STh/L= 0.600 25 Note  
PLAT933\_ALERT\_2\_G Number of HKL-OMIT Records in Embedded .res File 1 Note  
0 2 0,

PLAT969\_ALERT\_5\_G The 'Henn et al.' R-Factor-gap value ..... 2.273 Note  
Predicted wR2: Based on SigI\*\*2 3.86 or SHELX Weight 8.21  
PLAT983\_ALERT\_1\_G The Cm-f"= 4.8980 Deviates from IT-Value = 4.6980 Check

---

- 0 **ALERT level A** = Most likely a serious problem - resolve or explain  
1 **ALERT level B** = A potentially serious problem, consider carefully  
20 **ALERT level C** = Check. Ensure it is not caused by an omission or oversight  
9 **ALERT level G** = General information/check it is not something unexpected

4 ALERT type 1 CIF construction/syntax error, inconsistent or missing data  
14 ALERT type 2 Indicator that the structure model may be wrong or deficient  
5 ALERT type 3 Indicator that the structure quality may be low  
5 ALERT type 4 Improvement, methodology, query or suggestion  
2 ALERT type 5 Informative message, check

---

### Validation response form

Please find below a validation response form (VRF) that can be filled in and pasted into your CIF.

```
# start Validation Reply Form
_vrf_PLAT976_cm_mnt_0m
;
PROBLEM: Check Calcd Resid. Dens. 1.04Ang From C28 . -1.80 eA-3
RESPONSE: ...
;
# end Validation Reply Form
```

---

It is advisable to attempt to resolve as many as possible of the alerts in all categories. Often the minor alerts point to easily fixed oversights, errors and omissions in your CIF or refinement strategy, so attention to these fine details can be worthwhile. In order to resolve some of the more serious problems it may be necessary to carry out additional measurements or structure refinements. However, the purpose of your study may justify the reported deviations and the more serious of these should normally be commented upon in the discussion or experimental section of a paper or in the "special\_details" fields of the CIF. checkCIF was carefully designed to identify outliers and unusual parameters, but every test has its limitations and alerts that are not important in a particular case may appear. Conversely, the absence of alerts does not guarantee there are no aspects of the results needing attention. It is up to the individual to critically assess their own results and, if necessary, seek expert advice.

### Publication of your CIF in IUCr journals

A basic structural check has been run on your CIF. These basic checks will be run on all CIFs submitted for publication in IUCr journals (*Acta Crystallographica*, *Journal of Applied Crystallography*, *Journal of Synchrotron Radiation*); however, if you intend to submit to *Acta Crystallographica Section C* or *E* or *IUCrData*, you should make sure that full publication checks are run on the final version of your CIF prior to submission.

### Publication of your CIF in other journals

Please refer to the *Notes for Authors* of the relevant journal for any special instructions relating to CIF submission.

---

**PLATON version of 15/07/2024; check.def file version of 15/07/2024**

Datablock cm\_mnt\_0m - ellipsoid plot

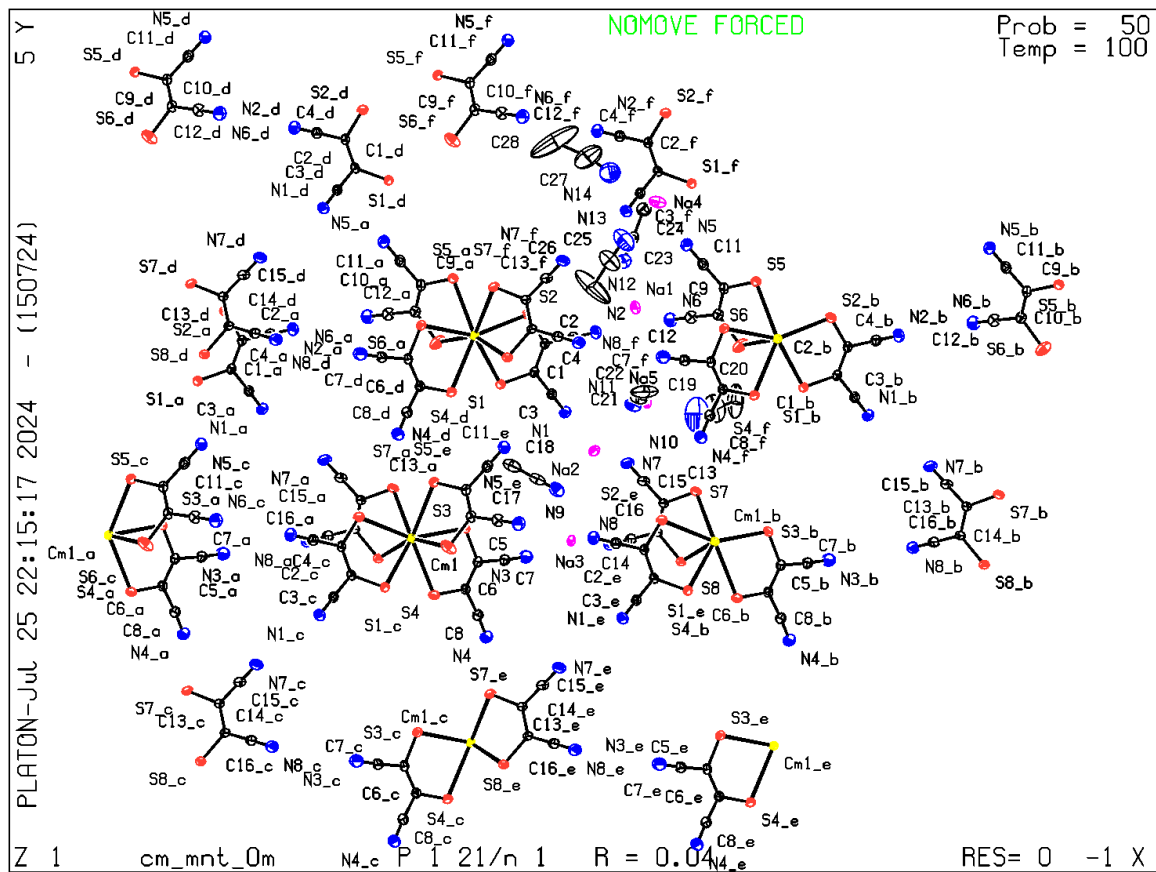

Supplement: Supplementary file 5 [file cm_beta_checkcif.pdf › finished cifs/cm_beta_checkcif.pdf]
