# Supplementary material for: Non–linear bonding trends in maleonitrile-1,2–dithiolate complexes of the transuranium actinides (An3+ = Np3+ – Cf3+ excl. Bk3+)
Source: Research Square preprint supplement (doi:10.21203/rs.3.rs-6100125/v1), 2025-03-05

## checkCIF/PLATON report

Structure factors have been supplied for datablock(s) eumnt\_030121\_nbb\_0m

THIS REPORT IS FOR GUIDANCE ONLY. IF USED AS PART OF A REVIEW PROCEDURE FOR PUBLICATION, IT SHOULD NOT REPLACE THE EXPERTISE OF AN EXPERIENCED CRYSTALLOGRAPHIC REFEREE.

No syntax errors found.      CIF dictionary      Interpreting this report

### Datablock: eumnt\_030121\_nbb\_0m

---

|                 |                                                  |                                   |                |
|-----------------|--------------------------------------------------|-----------------------------------|----------------|
| Bond precision: | C-C = 0.0091 A                                   | Wavelength=0.71073                |                |
| Cell:           | a=36.199 (2)                                     | b=13.5964 (8)                     | c=19.4534 (10) |
|                 | alpha=90                                         | beta=108.732 (2)                  | gamma=90       |
| Temperature:    | 100 K                                            |                                   |                |
|                 | Calculated                                       | Reported                          |                |
| Volume          | 9067.4 (9)                                       | 9067.3 (9)                        |                |
| Space group     | C 2/c                                            | C 1 2/c 1                         |                |
| Hall group      | -C 2yc                                           | -C 2yc                            |                |
| Moiety formula  | C64 Eu4 N32 S32, 22 (C2 N),<br>2 (C3 N), 20 (Na) | C27 Eu N13.5 Na5 S8, C1.5<br>N0.5 |                |
| Sum formula     | C114 Eu4 N56 Na20 S32                            | C28.50 Eu N14 Na5 S8              |                |
| Mr              | 4247.30                                          | 1061.82                           |                |
| Dx, g cm-3      | 1.556                                            | 1.556                             |                |
| Z               | 2                                                | 8                                 |                |
| Mu (mm-1)       | 1.839                                            | 1.839                             |                |
| F000            | 4120.0                                           | 4120.0                            |                |
| F000'           | 4128.47                                          |                                   |                |
| h,k,lmax        | 44,16,23                                         | 44,16,23                          |                |
| Nref            | 8630                                             | 8601                              |                |
| Tmin,Tmax       | 0.699,0.832                                      | 0.656,0.745                       |                |
| Tmin'           | 0.685                                            |                                   |                |

Correction method= # Reported T Limits: Tmin=0.656 Tmax=0.745  
AbsCorr = MULTI-SCAN

Data completeness= 0.997      Theta(max)= 25.701

R(reflections)= 0.0271 ( 8047)

wR2(reflections)=  
0.0753 ( 8601)

S = 1.045

Npar= 585

---

The following ALERTS were generated. Each ALERT has the format

**test-name\_ALERT\_alert-type\_alert-level.**

Click on the hyperlinks for more details of the test.

---

### Alert level C

|                   |                                                             |              |
|-------------------|-------------------------------------------------------------|--------------|
| PLAT042_ALERT_1_C | Calc. and Reported MoietyFormula Strings Differ             | Please Check |
|                   | Calc: C64 Eu4 N32 S32, 22(C2 N), 2(C3 N), 20(Na)            |              |
|                   | Rep.: C27 Eu N13.5 Na5 S8, C1.5 N0.5                        |              |
| PLAT243_ALERT_4_C | High 'Solvent' Ueq as Compared to Neighbors of              | C01C Check   |
| PLAT243_ALERT_4_C | High 'Solvent' Ueq as Compared to Neighbors of              | C019 Check   |
| PLAT244_ALERT_4_C | Low 'Solvent' Ueq as Compared to Neighbors of               | N00X Check   |
| PLAT244_ALERT_4_C | Low 'Solvent' Ueq as Compared to Neighbors of               | C01J Check   |
| PLAT244_ALERT_4_C | Low 'Solvent' Ueq as Compared to Neighbors of               | C018 Check   |
| PLAT244_ALERT_4_C | Low 'Solvent' Ueq as Compared to Neighbors of               | C01A Check   |
| PLAT260_ALERT_2_C | Large Average Ueq of Residue Including N00X                 | 0.116 Check  |
| PLAT260_ALERT_2_C | Large Average Ueq of Residue Including N01G                 | 0.181 Check  |
| PLAT342_ALERT_3_C | Low Bond Precision on C-C Bonds .....                       | 0.00912 Ang. |
| PLAT910_ALERT_3_C | Missing # of FCF Reflection(s) Below Theta(Min).            | 9 Note       |
|                   | 1 1 0, 2 0 0, 3 1 0, 4 0 0, -3 1 1, -1 1 1,                 |              |
|                   | 1 1 1, -2 0 2, 0 0 2,                                       |              |
| PLAT911_ALERT_3_C | Missing FCF Refl Between Thmin & STh/L= 0.600               | 14 Report    |
|                   | 0 2 0, 8 2 0, 9 3 1, -10 2 2, 2 0 2, -39 1 15,              |              |
|                   | -38 0 16, -38 2 16, -36 0 16, -37 1 17, -37 3 17, -36 2 18, |              |
|                   | -33 3 19, -28 0 20,                                         |              |
| PLAT934_ALERT_3_C | Number of (Iobs-Icalc)/Sigma(W) > 10 Outliers ..            | 1 Check      |
|                   | -42 0 10,                                                   |              |
| PLAT975_ALERT_2_C | Check Calcd Resid. Dens. 1.02Ang From C17                   | 0.70 eA-3    |
| PLAT975_ALERT_2_C | Check Calcd Resid. Dens. 1.01Ang From C01C                  | 0.52 eA-3    |
| PLAT975_ALERT_2_C | Check Calcd Resid. Dens. 1.01Ang From C01F                  | 0.47 eA-3    |
| PLAT975_ALERT_2_C | Check Calcd Resid. Dens. 1.07Ang From C019                  | 0.40 eA-3    |
| PLAT976_ALERT_2_C | Check Calcd Resid. Dens. 0.53Ang From C23                   | -0.60 eA-3   |

### Alert level G

|                   |                                                  |              |
|-------------------|--------------------------------------------------|--------------|
| PLAT003_ALERT_2_G | Number of Uiso or U(i,j) Restrained non-H Atoms  | 9 Report     |
| PLAT004_ALERT_5_G | Polymeric Structure Found with Maximum Dimension | 2 Info       |
| PLAT040_ALERT_1_G | No H-atoms in this Carbon Containing Compound .. | Please Check |
| PLAT045_ALERT_1_G | Calculated and Reported Z Differ by a Factor ... | 0.250 Check  |
| PLAT083_ALERT_2_G | SHELXL Second Parameter in WGHT Unusually Large  | 35.32 Why ?  |
| PLAT128_ALERT_4_G | Alternate Setting for Input Space Group C2/c     | I2/a Note    |
| PLAT186_ALERT_4_G | The CIF-Embedded .res File Contains ISOR Records | 4 Report     |
| PLAT299_ALERT_4_G | Atom Site Occupancy Constrained at .....         | 0.5 Check    |
|                   | C017 C0 C19 C20 N9 C17 N10 N21                   |              |
|                   | C01I C18 C01E C21                                |              |
| PLAT302_ALERT_4_G | Anion/Solvent/Minor-Residue Disorder (Resd 2)    | 67% Note     |
| PLAT302_ALERT_4_G | Anion/Solvent/Minor-Residue Disorder (Resd 3)    | 67% Note     |
| PLAT302_ALERT_4_G | Anion/Solvent/Minor-Residue Disorder (Resd 4)    | 67% Note     |
| PLAT302_ALERT_4_G | Anion/Solvent/Minor-Residue Disorder (Resd 5)    | 67% Note     |
| PLAT302_ALERT_4_G | Anion/Solvent/Minor-Residue Disorder (Resd 12)   | 100% Note    |
| PLAT302_ALERT_4_G | Anion/Solvent/Minor-Residue Disorder (Resd 14)   | 100% Note    |
| PLAT432_ALERT_2_G | Short Inter X...Y Contact N21 ..C17              | 2.96 Ang.    |
|                   | x,y,z = 1_555 Check                              |              |
| PLAT432_ALERT_2_G | Short Inter X...Y Contact C017 ..C01A            | 3.11 Ang.    |
|                   | x,1-y,-1/2+z = 6_565 Check                       |              |
| PLAT432_ALERT_2_G | Short Inter X...Y Contact C017 ..C01K            | 3.16 Ang.    |



It is advisable to attempt to resolve as many as possible of the alerts in all categories. Often the minor alerts point to easily fixed oversights, errors and omissions in your CIF or refinement strategy, so attention to these fine details can be worthwhile. In order to resolve some of the more serious problems it may be necessary to carry out additional measurements or structure refinements. However, the purpose of your study may justify the reported deviations and the more serious of these should normally be commented upon in the discussion or experimental section of a paper or in the "special\_details" fields of the CIF. checkCIF was carefully designed to identify outliers and unusual parameters, but every test has its limitations and alerts that are not important in a particular case may appear. Conversely, the absence of alerts does not guarantee there are no aspects of the results needing attention. It is up to the individual to critically assess their own results and, if necessary, seek expert advice.

### **Publication of your CIF in IUCr journals**

A basic structural check has been run on your CIF. These basic checks will be run on all CIFs submitted for publication in IUCr journals (*Acta Crystallographica*, *Journal of Applied Crystallography*, *Journal of Synchrotron Radiation*); however, if you intend to submit to *Acta Crystallographica Section C* or *E* or *IUCrData*, you should make sure that full publication checks are run on the final version of your CIF prior to submission.

### **Publication of your CIF in other journals**

Please refer to the *Notes for Authors* of the relevant journal for any special instructions relating to CIF submission.

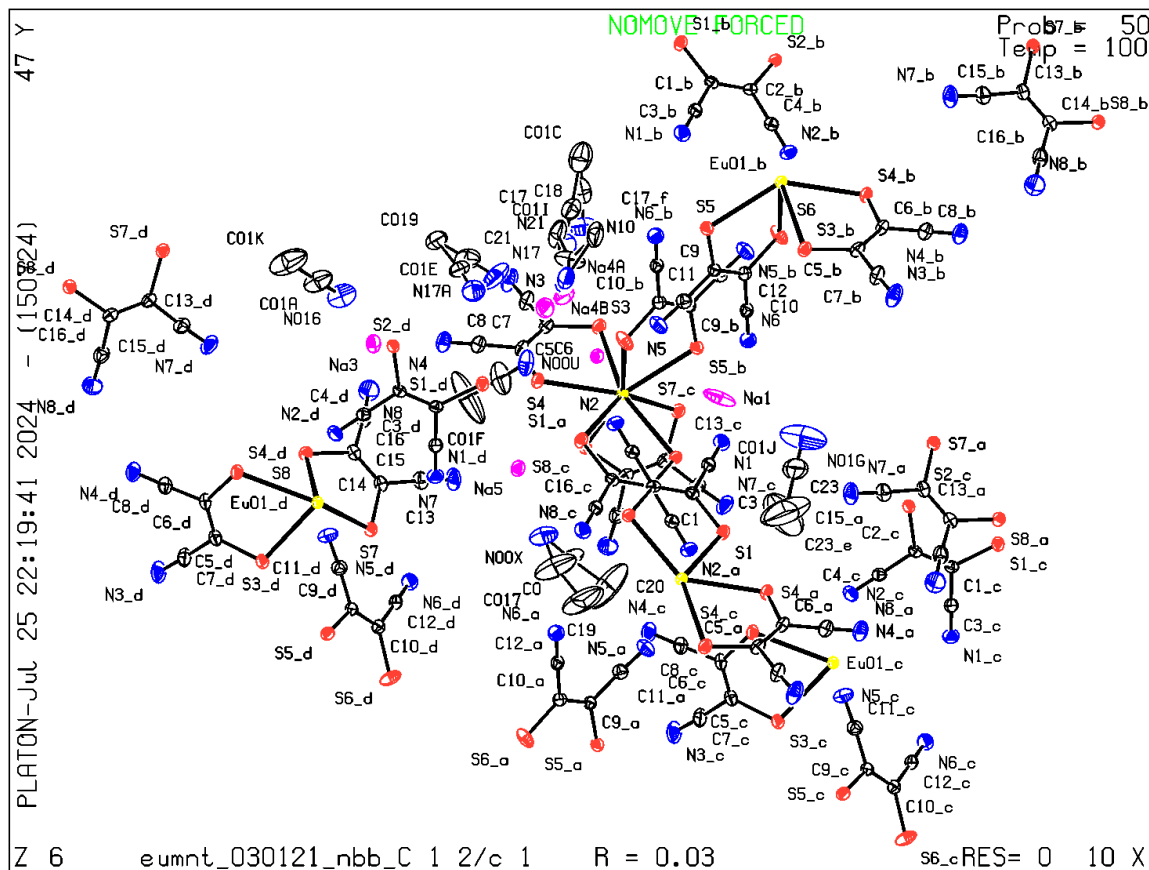

Supplement: Supplementary file 7 [file eu_alpha_checkcif.pdf › finished cifs/eu_alpha_checkcif.pdf]
