# Supplementary material for: Non–linear bonding trends in maleonitrile-1,2–dithiolate complexes of the transuranium actinides (An3+ = Np3+ – Cf3+ excl. Bk3+)
Source: Research Square preprint supplement (doi:10.21203/rs.3.rs-6100125/v1), 2025-03-05

## checkCIF/PLATON report

Structure factors have been supplied for datablock(s) cemnt\_020521\_0m

THIS REPORT IS FOR GUIDANCE ONLY. IF USED AS PART OF A REVIEW PROCEDURE FOR PUBLICATION, IT SHOULD NOT REPLACE THE EXPERTISE OF AN EXPERIENCED CRYSTALLOGRAPHIC REFEREE.

No syntax errors found.      CIF dictionary      Interpreting this report

### Datablock: cemnt\_020521\_0m

---

|                        |                                                                           |                                    |
|------------------------|---------------------------------------------------------------------------|------------------------------------|
| Bond precision:        | C-C = 0.0036 Å                                                            | Wavelength=0.71073                 |
| Cell:                  | a=36.555 (3)      b=13.7610 (11)      c=19.5407 (15)                      |                                    |
|                        | alpha=90      beta=109.116 (2)      gamma=90                              |                                    |
| Temperature:           | 100 K                                                                     |                                    |
|                        | Calculated                                                                | Reported                           |
| Volume                 | 9287.6 (13)                                                               | 9287.6 (13)                        |
| Space group            | C 2/c                                                                     | C 1 2/c 1                          |
| Hall group             | -C 2yc                                                                    | -C 2yc                             |
| Moiety formula         | C64 Ce4 N32 S32, 20 (C2 N),<br>4 (C1.50 N0.50), 4 (C0.50<br>N0.50), 20 (N | C27 Ce N13.5 Na5 S8, 0.5 (C2<br>N) |
| Sum formula            | C112 Ce4 N56 Na20 S32                                                     | C28 Ce N14 Na5 S8                  |
| Mr                     | 4175.88                                                                   | 1043.97                            |
| Dx, g cm <sup>-3</sup> | 1.493                                                                     | 1.493                              |
| Z                      | 2                                                                         | 8                                  |
| Mu (mm <sup>-1</sup> ) | 1.424                                                                     | 1.424                              |
| F000                   | 4056.0                                                                    | 4056.0                             |
| F000'                  | 4063.72                                                                   |                                    |
| h, k, lmax             | 60, 22, 32                                                                | 59, 22, 32                         |
| Nref                   | 21518                                                                     | 21446                              |
| Tmin, Tmax             | 0.760, 0.867                                                              | 0.643, 0.747                       |
| Tmin'                  | 0.745                                                                     |                                    |

Correction method= # Reported T Limits: Tmin=0.643 Tmax=0.747  
AbsCorr = MULTI-SCAN

Data completeness= 0.997

Theta (max)= 35.694

R(reflections)= 0.0360( 17433)

wR2(reflections)=  
0.0865( 21446)

S = 1.043

Npar= 598

The following ALERTS were generated. Each ALERT has the format

**test-name\_ALERT\_alert-type\_alert-level.**

Click on the hyperlinks for more details of the test.

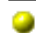

### Alert level C

PLAT042\_ALERT\_1\_C Calc. and Reported MoietyFormula Strings Differ Please Check  
Calc: C64 Ce4 N32 S32, 20(C2 N), 4(C1.50 N0.50), 4(C0.50 N0.50), 2  
Rep.: C27 Ce N13.5 Na5 S8, 0.5(C2 N)

PLAT243\_ALERT\_4\_C High 'Solvent' Ueq as Compared to Neighbors of N55 Check  
PLAT244\_ALERT\_4\_C Low 'Solvent' Ueq as Compared to Neighbors of C47 Check  
PLAT244\_ALERT\_4\_C Low 'Solvent' Ueq as Compared to Neighbors of C53 Check  
PLAT260\_ALERT\_2\_C Large Average Ueq of Residue Including N46 0.155 Check  
PLAT260\_ALERT\_2\_C Large Average Ueq of Residue Including N41A 0.112 Check  
PLAT911\_ALERT\_3\_C Missing FCF Refl Between Thmin & STh/L= 0.600 14 Report  
3 1 0, 4 0 0, -3 1 1, 1 1 1, 3 1 1, 4 2 1,  
-4 0 2, -2 0 2, 0 0 2, 2 0 2, -4 2 3, -3 1 3,  
-4 0 4, -4 0 6,

PLAT918\_ALERT\_3\_C Reflection(s) with I(obs) much Smaller I(calc) . 1 Check  
PLAT934\_ALERT\_3\_C Number of (Iobs-Icalc)/Sigma(W) > 10 Outliers .. 1 Check  
3 3 1,

PLAT971\_ALERT\_2\_C Check Calcd Resid. Dens. 0.84Ang From Na2 1.86 eA-3  
PLAT971\_ALERT\_2\_C Check Calcd Resid. Dens. 0.26Ang From Na2 1.82 eA-3  
PLAT972\_ALERT\_2\_C Check Calcd Resid. Dens. 0.71Ang From Na2 -1.72 eA-3  
PLAT972\_ALERT\_2\_C Check Calcd Resid. Dens. 0.25Ang From Na2 -1.62 eA-3

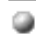

### Alert level G

PLAT002\_ALERT\_2\_G Number of Distance or Angle Restraints on AtSite 8 Note  
PLAT003\_ALERT\_2\_G Number of Uiso or U(i,j) Restrained non-H Atoms 4 Report  
PLAT004\_ALERT\_5\_G Polymeric Structure Found with Maximum Dimension 2 Info  
PLAT040\_ALERT\_1\_G No H-atoms in this Carbon Containing Compound .. Please Check  
PLAT045\_ALERT\_1\_G Calculated and Reported Z Differ by a Factor ... 0.250 Check  
PLAT083\_ALERT\_2\_G SHELXL Second Parameter in WGHT Unusually Large 23.38 Why ?  
PLAT128\_ALERT\_4\_G Alternate Setting for Input Space Group C2/c I2/a Note  
PLAT172\_ALERT\_4\_G The CIF-Embedded .res File Contains DFIX Records 4 Report  
PLAT176\_ALERT\_4\_G The CIF-Embedded .res File Contains SADI Records 1 Report  
PLAT178\_ALERT\_4\_G The CIF-Embedded .res File Contains SIMU Records 1 Report  
PLAT299\_ALERT\_4\_G Atom Site Occupancy Constrained at ..... 0.5 Check  
C5A C17 C23 C28 N40 C44 C19 C20  
C50 C50A C18 C21 C22 C56 N41 C43  
N41A C43A

PLAT302\_ALERT\_4\_G Anion/Solvent/Minor-Residue Disorder (Resd 2) 67% Note  
PLAT302\_ALERT\_4\_G Anion/Solvent/Minor-Residue Disorder (Resd 3) 67% Note  
PLAT302\_ALERT\_4\_G Anion/Solvent/Minor-Residue Disorder (Resd 4) 67% Note  
PLAT302\_ALERT\_4\_G Anion/Solvent/Minor-Residue Disorder (Resd 5) 67% Note  
PLAT302\_ALERT\_4\_G Anion/Solvent/Minor-Residue Disorder (Resd 6) 50% Note  
PLAT302\_ALERT\_4\_G Anion/Solvent/Minor-Residue Disorder (Resd 9) 100% Note  
PLAT302\_ALERT\_4\_G Anion/Solvent/Minor-Residue Disorder (Resd 13) 100% Note  
PLAT302\_ALERT\_4\_G Anion/Solvent/Minor-Residue Disorder (Resd 15) 100% Note  
PLAT432\_ALERT\_2\_G Short Inter X...Y Contact N41A ..C45 . 2.97 Ang.

|                                                                    |                                                      |         |             |
|--------------------------------------------------------------------|------------------------------------------------------|---------|-------------|
| PLAT432_ALERT_2_G Short Inter X...Y Contact                        | C43A                                                 | x,y,z = | 1_555 Check |
|                                                                    |                                                      | ..C45   | 1.76 Ang.   |
|                                                                    |                                                      | x,y,z = | 1_555 Check |
| PLAT773_ALERT_2_G Check long C-C Bond in CIF: C50                  |                                                      | --C19   | 1.84 Ang.   |
| PLAT773_ALERT_2_G Check long C-C Bond in CIF: C45                  |                                                      | --C43A  | 1.76 Ang.   |
| PLAT789_ALERT_4_G Atoms with Negative _atom_site_disorder_group #  |                                                      |         | 6 Check     |
| PLAT794_ALERT_5_G Tentative Bond Valency for Cel                   | (III)                                                |         | 3.57 Info   |
| PLAT822_ALERT_4_G CIF-embedded .res Contains Negative PART Numbers |                                                      |         | 5 Check     |
| PLAT860_ALERT_3_G Number of Least-Squares Restraints .....         |                                                      |         | 42 Note     |
| PLAT910_ALERT_3_G Missing # of FCF Reflection(s) Below Theta(Min). |                                                      |         | 2 Note      |
|                                                                    | 1 1 0, 2 0 0,                                        |         |             |
| PLAT912_ALERT_4_G Missing # of FCF Reflections Above STh/L=        | 0.600                                                |         | 55 Note     |
| PLAT933_ALERT_2_G Number of HKL-OMIT Records in Embedded .res File |                                                      |         | 8 Note      |
|                                                                    | 1 1 1, -4 0 2, -4 0 6, 3 1 1, -4 0 4, -3 1 3,        |         |             |
|                                                                    | 4 2 1, -4 2 3,                                       |         |             |
| PLAT969_ALERT_5_G The 'Henn et al.' R-Factor-gap value .....       |                                                      |         | 3.018 Note  |
|                                                                    | Predicted wR2: Based on SigI**2 2.87 or SHELX Weight |         | 8.29        |

---

0 **ALERT level A** = Most likely a serious problem - resolve or explain  
 0 **ALERT level B** = A potentially serious problem, consider carefully  
 13 **ALERT level C** = Check. Ensure it is not caused by an omission or oversight  
 31 **ALERT level G** = General information/check it is not something unexpected

3 ALERT type 1 CIF construction/syntax error, inconsistent or missing data  
 14 ALERT type 2 Indicator that the structure model may be wrong or deficient  
 5 ALERT type 3 Indicator that the structure quality may be low  
 19 ALERT type 4 Improvement, methodology, query or suggestion  
 3 ALERT type 5 Informative message, check

---

It is advisable to attempt to resolve as many as possible of the alerts in all categories. Often the minor alerts point to easily fixed oversights, errors and omissions in your CIF or refinement strategy, so attention to these fine details can be worthwhile. In order to resolve some of the more serious problems it may be necessary to carry out additional measurements or structure refinements. However, the purpose of your study may justify the reported deviations and the more serious of these should normally be commented upon in the discussion or experimental section of a paper or in the "special\_details" fields of the CIF. checkCIF was carefully designed to identify outliers and unusual parameters, but every test has its limitations and alerts that are not important in a particular case may appear. Conversely, the absence of alerts does not guarantee there are no aspects of the results needing attention. It is up to the individual to critically assess their own results and, if necessary, seek expert advice.

### **Publication of your CIF in IUCr journals**

A basic structural check has been run on your CIF. These basic checks will be run on all CIFs submitted for publication in IUCr journals (*Acta Crystallographica*, *Journal of Applied Crystallography*, *Journal of Synchrotron Radiation*); however, if you intend to submit to *Acta Crystallographica Section C* or *E* or *IUCrData*, you should make sure that full publication checks are run on the final version of your CIF prior to submission.

### **Publication of your CIF in other journals**

Please refer to the *Notes for Authors* of the relevant journal for any special instructions relating to CIF submission.

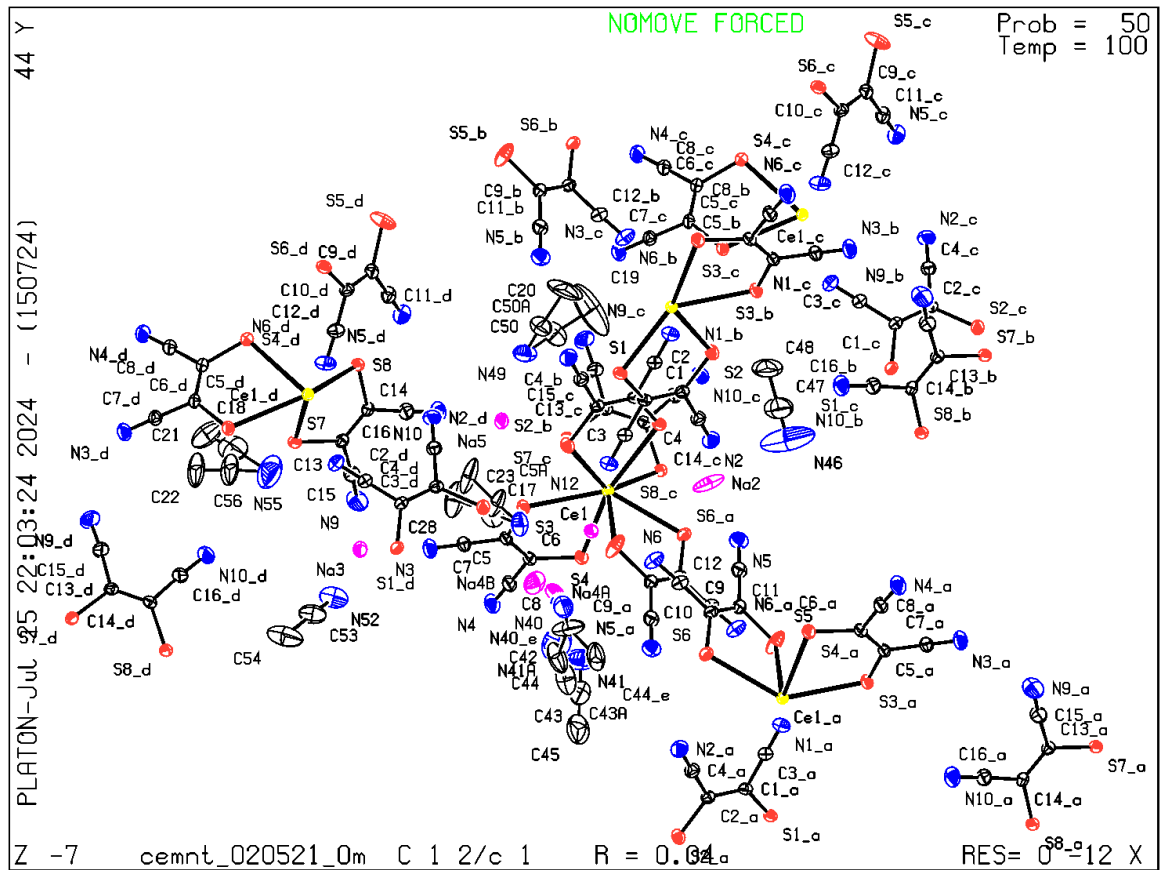

Supplement: Supplementary file 2 [file ce_alpha_checkcif.pdf › finished cifs/ce_alpha_checkcif.pdf]
