# Supplementary material for: Non–linear bonding trends in maleonitrile-1,2–dithiolate complexes of the transuranium actinides (An3+ = Np3+ – Cf3+ excl. Bk3+)
Source: Research Square preprint supplement (doi:10.21203/rs.3.rs-6100125/v1), 2025-03-05

## checkCIF/PLATON report

Structure factors have been supplied for datablock(s) prmnt\_092721\_0m

THIS REPORT IS FOR GUIDANCE ONLY. IF USED AS PART OF A REVIEW PROCEDURE FOR PUBLICATION, IT SHOULD NOT REPLACE THE EXPERTISE OF AN EXPERIENCED CRYSTALLOGRAPHIC REFEREE.

No syntax errors found.      CIF dictionary      Interpreting this report

### Datablock: prmnt\_092721\_0m

---

Bond precision:      C-C = 0.0024 Å      Wavelength=0.71073

Cell:                      a=36.3329(12)      b=13.7118(5)      c=19.4577(7)  
                                alpha=90                  beta=108.999(1)      gamma=90

Temperature:      100 K

|                        | Calculated                                              | Reported              |
|------------------------|---------------------------------------------------------|-----------------------|
| Volume                 | 9165.6(6)                                               | 9165.5(6)             |
| Space group            | C 2/c                                                   | C 1 2/c 1             |
| Hall group             | -C 2yc                                                  | -C 2yc                |
| Moiety formula         | C64 N32 Pr4 S32, 4(C N0.50 Na), 24(C N0.50), 15.928(Na) | C28 N14 Na4.982 Pr S8 |
| Sum formula            | C112 N56 Na19.93 Pr4 S32                                | C28 N14 Na4.98 Pr S8  |
| Mr                     | 4177.39                                                 | 1044.30               |
| Dx, g cm <sup>-3</sup> | 1.514                                                   | 1.514                 |
| Z                      | 2                                                       | 8                     |
| Mu (mm <sup>-1</sup> ) | 1.513                                                   | 1.513                 |
| F000                   | 4062.4                                                  | 4062.0                |
| F000'                  | 4070.40                                                 |                       |
| h, k, lmax             | 64, 24, 34                                              | 64, 24, 34            |
| Nref                   | 27530                                                   | 27431                 |
| Tmin, Tmax             | 0.746, 0.860                                            | 0.677, 0.748          |
| Tmin'                  | 0.732                                                   |                       |

Correction method= # Reported T Limits: Tmin=0.677 Tmax=0.748  
AbsCorr = MULTI-SCAN

Data completeness= 0.996      Theta(max)= 39.496

R(reflections)= 0.0326( 22920)

wR2(reflections)=  
0.0713( 27431)

S = 1.079

Npar= 599

The following ALERTS were generated. Each ALERT has the format

**test-name\_ALERT\_alert-type\_alert-level.**

Click on the hyperlinks for more details of the test.

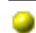

### Alert level C

PLAT042\_ALERT\_1\_C Calc. and Reported MoietyFormula Strings Differ Please Check  
Calc: C64 N32 Pr4 S32, 4(C N0.50 Na), 24(C N0.50), 15.928(Na)  
Rep.: C28 N14 Na4.982 Pr S8

PLAT214\_ALERT\_2\_C Atom C01L (Anion/Solvent) ADP max/min Ratio 4.5 prolat

PLAT243\_ALERT\_4\_C High 'Solvent' Ueq as Compared to Neighbors of C01E Check

PLAT244\_ALERT\_4\_C Low 'Solvent' Ueq as Compared to Neighbors of C20 Check

PLAT244\_ALERT\_4\_C Low 'Solvent' Ueq as Compared to Neighbors of C019 Check

PLAT244\_ALERT\_4\_C Low 'Solvent' Ueq as Compared to Neighbors of C01I Check

PLAT260\_ALERT\_2\_C Large Average Ueq of Residue Including N14 0.101 Check

PLAT260\_ALERT\_2\_C Large Average Ueq of Residue Including N01G 0.128 Check

PLAT767\_ALERT\_4\_C INS Embedded LIST 6 Instruction Should be LIST 4 Please Check

PLAT906\_ALERT\_3\_C Large K Value in the Analysis of Variance ..... 2.296 Check

PLAT910\_ALERT\_3\_C Missing # of FCF Reflection(s) Below Theta(Min). 8 Note

1 1 0, 2 0 0, 3 1 0, -3 1 1, -1 1 1, 1 1 1,  
-2 0 2, 0 0 2,

PLAT911\_ALERT\_3\_C Missing FCF Refl Between Thmin & STh/L= 0.600 10 Report

5 1 0, -11 1 1, 0 2 1, -4 0 2, -3 1 2, -1 1 2,  
2 0 2, -3 1 3, -4 0 4, -4 0 6,

PLAT934\_ALERT\_3\_C Number of (Iobs-Icalc)/Sigma(W) > 10 Outliers .. 1 Check

-8 0 4,

PLAT971\_ALERT\_2\_C Check Calcd Resid. Dens. 0.33Ang From S6 1.85 eA-3

PLAT971\_ALERT\_2\_C Check Calcd Resid. Dens. 0.47Ang From S6 1.61 eA-3

PLAT972\_ALERT\_2\_C Check Calcd Resid. Dens. 0.74Ang From S6 -2.37 eA-3

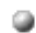

### Alert level G

PLAT004\_ALERT\_5\_G Polymeric Structure Found with Maximum Dimension 2 Info

PLAT040\_ALERT\_1\_G No H-atoms in this Carbon Containing Compound .. Please Check

PLAT045\_ALERT\_1\_G Calculated and Reported Z Differ by a Factor ... 0.250 Check

PLAT068\_ALERT\_1\_G Reported F000 Differs from Calcd (or Missing)... Please Check

PLAT083\_ALERT\_2\_G SHELXL Second Parameter in WGHT Unusually Large 17.10 Why ?

PLAT128\_ALERT\_4\_G Alternate Setting for Input Space Group C2/c I2/a Note

PLAT299\_ALERT\_4\_G Atom Site Occupancy Constrained at ..... 0.5 Check

Na4A Na4B N9 C17 C28 N10 N18 C01M  
C22 N11 C25 C23 C26 C21 C24 N12  
C18 C27

PLAT302\_ALERT\_4\_G Anion/Solvent/Minor-Residue Disorder (Resd 2) 100% Note

PLAT302\_ALERT\_4\_G Anion/Solvent/Minor-Residue Disorder (Resd 3) 67% Note

PLAT302\_ALERT\_4\_G Anion/Solvent/Minor-Residue Disorder (Resd 4) 67% Note

PLAT302\_ALERT\_4\_G Anion/Solvent/Minor-Residue Disorder (Resd 5) 33% Note

PLAT302\_ALERT\_4\_G Anion/Solvent/Minor-Residue Disorder (Resd 6) 33% Note

PLAT302\_ALERT\_4\_G Anion/Solvent/Minor-Residue Disorder (Resd 9) 100% Note

PLAT302\_ALERT\_4\_G Anion/Solvent/Minor-Residue Disorder (Resd 10) 100% Note

PLAT302\_ALERT\_4\_G Anion/Solvent/Minor-Residue Disorder (Resd 14) 100% Note

PLAT432\_ALERT\_2\_G Short Inter X...Y Contact N9 ..C25 . 2.99 Ang.

|                   |                                                  |       |                 |       |           |
|-------------------|--------------------------------------------------|-------|-----------------|-------|-----------|
| PLAT432_ALERT_2_G | Short Inter X...Y Contact                        | C17   | x,y,z =         | 1_555 | Check     |
|                   |                                                  |       | ..C25           | .     | 3.06 Ang. |
| PLAT432_ALERT_2_G | Short Inter X...Y Contact                        | C21   | x,y,z =         | 1_555 | Check     |
|                   |                                                  |       | ..C23           | .     | 3.08 Ang. |
|                   |                                                  |       | x,-y,-1/2+z =   | 6_555 | Check     |
| PLAT720_ALERT_4_G | Number of Unusual/Non-Standard Labels            | ..... |                 | 11    | Note      |
|                   | Pr01                                             | N00G  | N013            | C018  | C019      |
|                   | C01I                                             | C01L  | C01M            | C01A  | C01E      |
|                   |                                                  |       |                 |       | N01G      |
| PLAT789_ALERT_4_G | Atoms with Negative _atom_site_disorder_group    | #     |                 | 7     | Check     |
| PLAT794_ALERT_5_G | Tentative Bond Valency for Pr01                  | (III) | .               | 3.29  | Info      |
| PLAT822_ALERT_4_G | CIF-embedded .res Contains Negative PART Numbers |       |                 | 5     | Check     |
| PLAT912_ALERT_4_G | Missing # of FCF Reflections Above STh/L=        | 0.600 |                 | 82    | Note      |
| PLAT933_ALERT_2_G | Number of HKL-OMIT Records in Embedded .res File |       |                 | 7     | Note      |
|                   | 1 1 1, -2 0 2, -4 0 6, -4 0 4, 5 1 0, -3 1 3,    |       |                 |       |           |
|                   | -11 1 1,                                         |       |                 |       |           |
| PLAT969_ALERT_5_G | The 'Henn et al.' R-Factor-gap value             | ..... |                 | 2.660 | Note      |
|                   | Predicted wR2: Based on SigI**2                  | 2.68  | or SHELX Weight | 6.61  |           |

---

0 **ALERT level A** = Most likely a serious problem - resolve or explain  
 0 **ALERT level B** = A potentially serious problem, consider carefully  
 16 **ALERT level C** = Check. Ensure it is not caused by an omission or oversight  
 25 **ALERT level G** = General information/check it is not something unexpected

4 ALERT type 1 CIF construction/syntax error, inconsistent or missing data  
 11 ALERT type 2 Indicator that the structure model may be wrong or deficient  
 4 ALERT type 3 Indicator that the structure quality may be low  
 19 ALERT type 4 Improvement, methodology, query or suggestion  
 3 ALERT type 5 Informative message, check

---

It is advisable to attempt to resolve as many as possible of the alerts in all categories. Often the minor alerts point to easily fixed oversights, errors and omissions in your CIF or refinement strategy, so attention to these fine details can be worthwhile. In order to resolve some of the more serious problems it may be necessary to carry out additional measurements or structure refinements. However, the purpose of your study may justify the reported deviations and the more serious of these should normally be commented upon in the discussion or experimental section of a paper or in the "special\_details" fields of the CIF. checkCIF was carefully designed to identify outliers and unusual parameters, but every test has its limitations and alerts that are not important in a particular case may appear. Conversely, the absence of alerts does not guarantee there are no aspects of the results needing attention. It is up to the individual to critically assess their own results and, if necessary, seek expert advice.

### **Publication of your CIF in IUCr journals**

A basic structural check has been run on your CIF. These basic checks will be run on all CIFs submitted for publication in IUCr journals (*Acta Crystallographica*, *Journal of Applied Crystallography*, *Journal of Synchrotron Radiation*); however, if you intend to submit to *Acta Crystallographica Section C* or *E* or *IUCrData*, you should make sure that full publication checks are run on the final version of your CIF prior to submission.

### **Publication of your CIF in other journals**

Please refer to the *Notes for Authors* of the relevant journal for any special instructions relating to CIF submission.

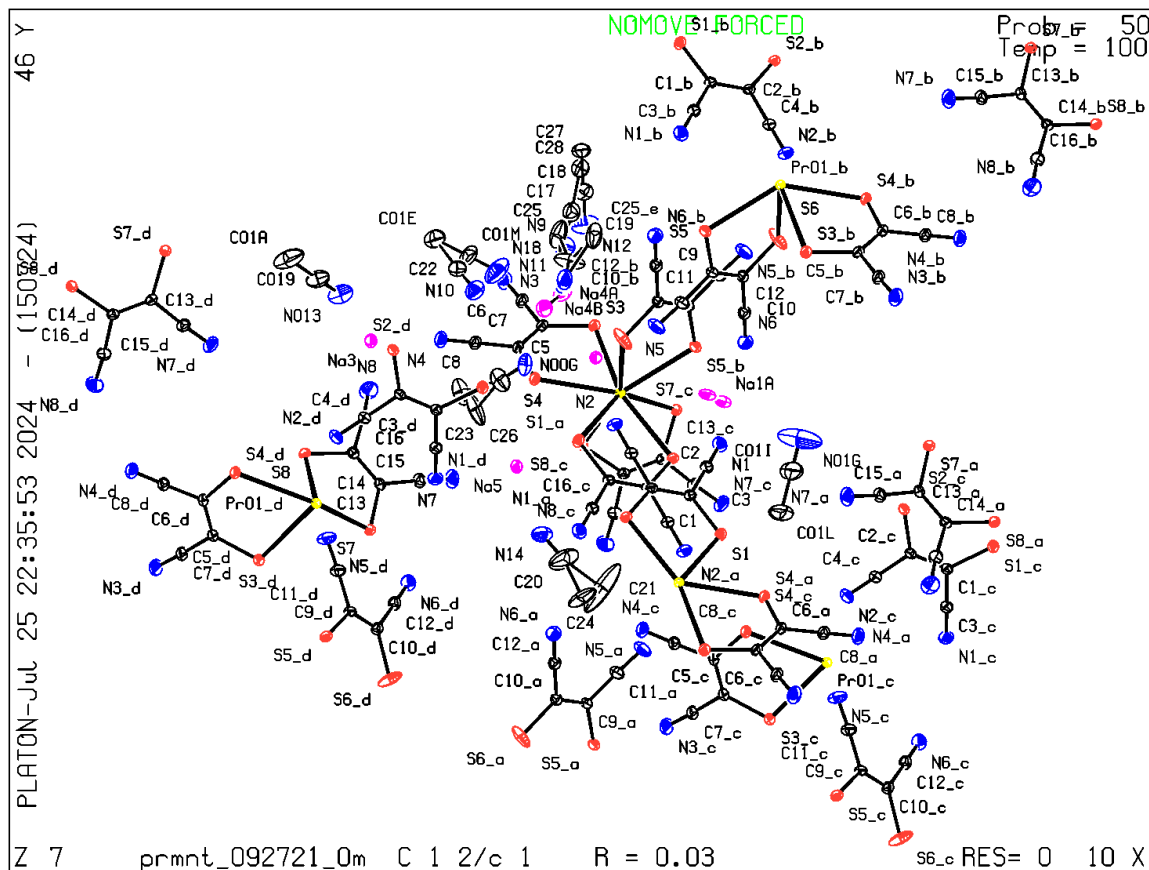

Supplement: Supplementary file 12 [file pr_alpha_checkcif.pdf › finished cifs/pr_alpha_checkcif.pdf]
