# Supplementary material for: Non–linear bonding trends in maleonitrile-1,2–dithiolate complexes of the transuranium actinides (An3+ = Np3+ – Cf3+ excl. Bk3+)
Source: Research Square preprint supplement (doi:10.21203/rs.3.rs-6100125/v1), 2025-03-05

## checkCIF/PLATON report

Structure factors have been supplied for datablock(s) gdmnt\_0m

THIS REPORT IS FOR GUIDANCE ONLY. IF USED AS PART OF A REVIEW PROCEDURE FOR PUBLICATION, IT SHOULD NOT REPLACE THE EXPERTISE OF AN EXPERIENCED CRYSTALLOGRAPHIC REFEREE.

No syntax errors found. CIF dictionary Interpreting this report

**Datablock: gdmnt\_0m**

|                 |                |                    |                |
|-----------------|----------------|--------------------|----------------|
| Bond precision: | C-C = 0.0092 A | Wavelength=0.71073 |                |
| Cell:           | a=13.6798 (7)  | b=18.3572 (9)      | c=17.5889 (10) |
|                 | alpha=90       | beta=92.146 (2)    | gamma=90       |
| Temperature:    | 100 K          |                    |                |

|                        | Calculated            | Reported              |
|------------------------|-----------------------|-----------------------|
| Volume                 | 4413.9 (4)            | 4413.9 (4)            |
| Space group            | P 21/n                | P 1 21/n 1            |
| Hall group             | -P 2yn                | -P 2yn                |
| Moiety formula         | C28 H18 Gd N14 Na5 S8 | C28 H18 Gd N14 Na5 S8 |
| Sum formula            | C28 H18 Gd N14 Na5 S8 | C28 H18 Gd N14 Na5 S8 |
| Mr                     | 1079.25               | 1079.24               |
| Dx, g cm <sup>-3</sup> | 1.624                 | 1.624                 |
| Z                      | 4                     | 4                     |
| Mu (mm <sup>-1</sup> ) | 1.970                 | 1.970                 |
| F000                   | 2124.0                | 2124.0                |
| F000'                  | 2128.18               |                       |
| h, k, l <sub>max</sub> | 17, 22, 21            | 17, 22, 21            |
| Nref                   | 9019                  | 8914                  |
| Tmin, Tmax             | 0.681, 0.821          | 0.462, 0.746          |
| Tmin'                  | 0.668                 |                       |

```
Correction method= # Reported T Limits: Tmin=0.462 Tmax=0.746
AbsCorr = MULTI-SCAN
```

Data completeness= 0.988                      Theta (max)= 26.372

```
R(reflections)= 0.0439( 7675)      wR2(reflections)=
S = 1.023                        0.1199( 8914)
Npar= 511
```

---

The following ALERTS were generated. Each ALERT has the format

**test-name\_ALERT\_alert-type\_alert-level.**

Click on the hyperlinks for more details of the test.

---

### Alert level B

|                   |            |           |                                 |                         |           |
|-------------------|------------|-----------|---------------------------------|-------------------------|-----------|
| PLAT220_ALERT_2_B | NonSolvent | Resd 1    | C                               | Ueq(max)/Ueq(min) Range | 8.3 Ratio |
| PLAT242_ALERT_2_B | Low        | 'MainMol' | Ueq as Compared to Neighbors of | Na5 Check               |           |
| PLAT242_ALERT_2_B | Low        | 'MainMol' | Ueq as Compared to Neighbors of | C01G Check              |           |

---

### Alert level C

|                   |                                                  |                   |                                 |                         |           |          |
|-------------------|--------------------------------------------------|-------------------|---------------------------------|-------------------------|-----------|----------|
| PLAT220_ALERT_2_C | NonSolvent                                       | Resd 1            | N                               | Ueq(max)/Ueq(min) Range | 3.4 Ratio |          |
| PLAT241_ALERT_2_C | High                                             | 'MainMol'         | Ueq as Compared to Neighbors of | N014 Check              |           |          |
| PLAT241_ALERT_2_C | High                                             | 'MainMol'         | Ueq as Compared to Neighbors of | N4 Check                |           |          |
| PLAT241_ALERT_2_C | High                                             | 'MainMol'         | Ueq as Compared to Neighbors of | N01A Check              |           |          |
| PLAT241_ALERT_2_C | High                                             | 'MainMol'         | Ueq as Compared to Neighbors of | N01B Check              |           |          |
| PLAT241_ALERT_2_C | High                                             | 'MainMol'         | Ueq as Compared to Neighbors of | N01D Check              |           |          |
| PLAT241_ALERT_2_C | High                                             | 'MainMol'         | Ueq as Compared to Neighbors of | N7 Check                |           |          |
| PLAT242_ALERT_2_C | Low                                              | 'MainMol'         | Ueq as Compared to Neighbors of | Na2 Check               |           |          |
| PLAT242_ALERT_2_C | Low                                              | 'MainMol'         | Ueq as Compared to Neighbors of | Na3 Check               |           |          |
| PLAT242_ALERT_2_C | Low                                              | 'MainMol'         | Ueq as Compared to Neighbors of | Na4 Check               |           |          |
| PLAT242_ALERT_2_C | Low                                              | 'MainMol'         | Ueq as Compared to Neighbors of | C019 Check              |           |          |
| PLAT242_ALERT_2_C | Low                                              | 'MainMol'         | Ueq as Compared to Neighbors of | C01F Check              |           |          |
| PLAT242_ALERT_2_C | Low                                              | 'MainMol'         | Ueq as Compared to Neighbors of | C01H Check              |           |          |
| PLAT342_ALERT_3_C | Low Bond Precision on                            | C-C Bonds         | .....                           | 0.00917 Ang.            |           |          |
| PLAT910_ALERT_3_C | Missing # of FCF Reflection(s) Below Theta(Min). |                   |                                 | 9 Note                  |           |          |
|                   | 1 1 0,                                           | 0 2 0,            | -1 0 1,                         | 1 0 1,                  | -1 1 1,   | 0 1 1,   |
|                   | 1 1 1,                                           | 0 2 1,            | 0 0 2,                          |                         |           |          |
| PLAT911_ALERT_3_C | Missing FCF Refl Between Thmin & STh/L=          | 0.600             |                                 | 19 Report               |           |          |
|                   | 0 17 13,                                         | 1 17 13,          | 1 16 14,                        | 1 15 15,                | 2 15 15,  | 1 13 16, |
|                   | 0 14 16,                                         | 1 14 16,          | 0 12 17,                        | 1 12 17,                | 2 12 17,  | 3 12 17, |
|                   | -1 13 17,                                        | 0 13 17,          | 0 10 18,                        | 1 10 18,                | 0 11 18,  | -7 0 19, |
|                   | 2 8 19,                                          |                   |                                 |                         |           |          |
| PLAT971_ALERT_2_C | Check Calcd Resid. Dens.                         | 0.97Ang From Gd01 |                                 | 2.07 eA-3               |           |          |
| PLAT971_ALERT_2_C | Check Calcd Resid. Dens.                         | 0.94Ang From Gd01 |                                 | 2.06 eA-3               |           |          |
| PLAT972_ALERT_2_C | Check Calcd Resid. Dens.                         | 0.77Ang From Gd01 |                                 | -1.92 eA-3              |           |          |
| PLAT972_ALERT_2_C | Check Calcd Resid. Dens.                         | 0.82Ang From Gd01 |                                 | -1.61 eA-3              |           |          |
| PLAT977_ALERT_2_C | Check Negative Difference Density on H01E        | .                 |                                 | -0.33 eA-3              |           |          |

---

### Alert level G

|                   |                                                  |             |
|-------------------|--------------------------------------------------|-------------|
| PLAT002_ALERT_2_G | Number of Distance or Angle Restraints on AtSite | 6 Note      |
| PLAT004_ALERT_5_G | Polymeric Structure Found with Maximum Dimension | 3 Info      |
| PLAT083_ALERT_2_G | SHELXL Second Parameter in WGHT Unusually Large  | 17.38 Why ? |
| PLAT172_ALERT_4_G | The CIF-Embedded .res File Contains DFIX Records | 4 Report    |
| PLAT720_ALERT_4_G | Number of Unusual/Non-Standard Labels .....      | 33 Note     |
|                   | Gd01 N000 N00Y C012 N014 C017 H01A H01B          |             |
|                   | H01C C018 C019 N01A N01B C01C H01D H01E          |             |
|                   | H01F N01D C01E H01G H01H H01I C01F C01G          |             |
|                   | C01H C01I H01J H01K H01L C01J H01M H01N          |             |
|                   | H01O                                             |             |
| PLAT774_ALERT_1_G | Check X-Y Bond in CIF: Na3 --Na2 ..              | 4.22 Ang.   |
| PLAT794_ALERT_5_G | Tentative Bond Valency for Gd01 (III) .          | 3.34 Info   |
| PLAT860_ALERT_3_G | Number of Least-Squares Restraints .....         | 4 Note      |

|                   |                                                  |                      |       |      |
|-------------------|--------------------------------------------------|----------------------|-------|------|
| PLAT912_ALERT_4_G | Missing # of FCF Reflections Above STh/L=        | 0.600                | 77    | Note |
| PLAT933_ALERT_2_G | Number of HKL-OMIT Records in Embedded .res File |                      | 3     | Note |
|                   | 1 0 1, 0 2 0, -1 1 1,                            |                      |       |      |
| PLAT969_ALERT_5_G | The 'Henn et al.' R-Factor-gap value .....       |                      | 2.584 | Note |
|                   | Predicted wR2: Based on SigI**2                  | 4.64 or SHELX Weight | 11.72 |      |
| PLAT978_ALERT_2_G | Number C-C Bonds with Positive Residual Density. |                      | 0     | Info |

---

0 **ALERT level A** = Most likely a serious problem - resolve or explain  
3 **ALERT level B** = A potentially serious problem, consider carefully  
21 **ALERT level C** = Check. Ensure it is not caused by an omission or oversight  
12 **ALERT level G** = General information/check it is not something unexpected

1 ALERT type 1 CIF construction/syntax error, inconsistent or missing data  
25 ALERT type 2 Indicator that the structure model may be wrong or deficient  
4 ALERT type 3 Indicator that the structure quality may be low  
3 ALERT type 4 Improvement, methodology, query or suggestion  
3 ALERT type 5 Informative message, check

---

## Validation response form

Please find below a validation response form (VRF) that can be filled in and pasted into your CIF.

```
# start Validation Reply Form
_vrf_PLAT220_gdmnt_0m
;
PROBLEM: NonSolvent   Resd 1  C   Ueq(max)/Ueq(min) Range           8.3 Ratio
RESPONSE: ...
;
_vrf_PLAT242_gdmnt_0m
;
PROBLEM: Low         'MainMol' Ueq as Compared to Neighbors of      Na5 Check
RESPONSE: ...
;
# end Validation Reply Form
```

---

It is advisable to attempt to resolve as many as possible of the alerts in all categories. Often the minor alerts point to easily fixed oversights, errors and omissions in your CIF or refinement strategy, so attention to these fine details can be worthwhile. In order to resolve some of the more serious problems it may be necessary to carry out additional measurements or structure refinements. However, the purpose of your study may justify the reported deviations and the more serious of these should normally be commented upon in the discussion or experimental section of a paper or in the "special\_details" fields of the CIF. checkCIF was carefully designed to identify outliers and unusual parameters, but every test has its limitations and alerts that are not important in a particular case may appear. Conversely, the absence of alerts does not guarantee there are no aspects of the results needing attention. It is up to the individual to critically assess their own results and, if necessary, seek expert advice.

### **Publication of your CIF in IUCr journals**

A basic structural check has been run on your CIF. These basic checks will be run on all CIFs submitted for publication in IUCr journals (*Acta Crystallographica*, *Journal of Applied Crystallography*, *Journal of Synchrotron Radiation*); however, if you intend to submit to *Acta Crystallographica Section C* or *E* or *IUCrData*, you should make sure that full publication checks are run on the final version of your CIF prior to submission.

### **Publication of your CIF in other journals**

Please refer to the *Notes for Authors* of the relevant journal for any special instructions relating to CIF submission.

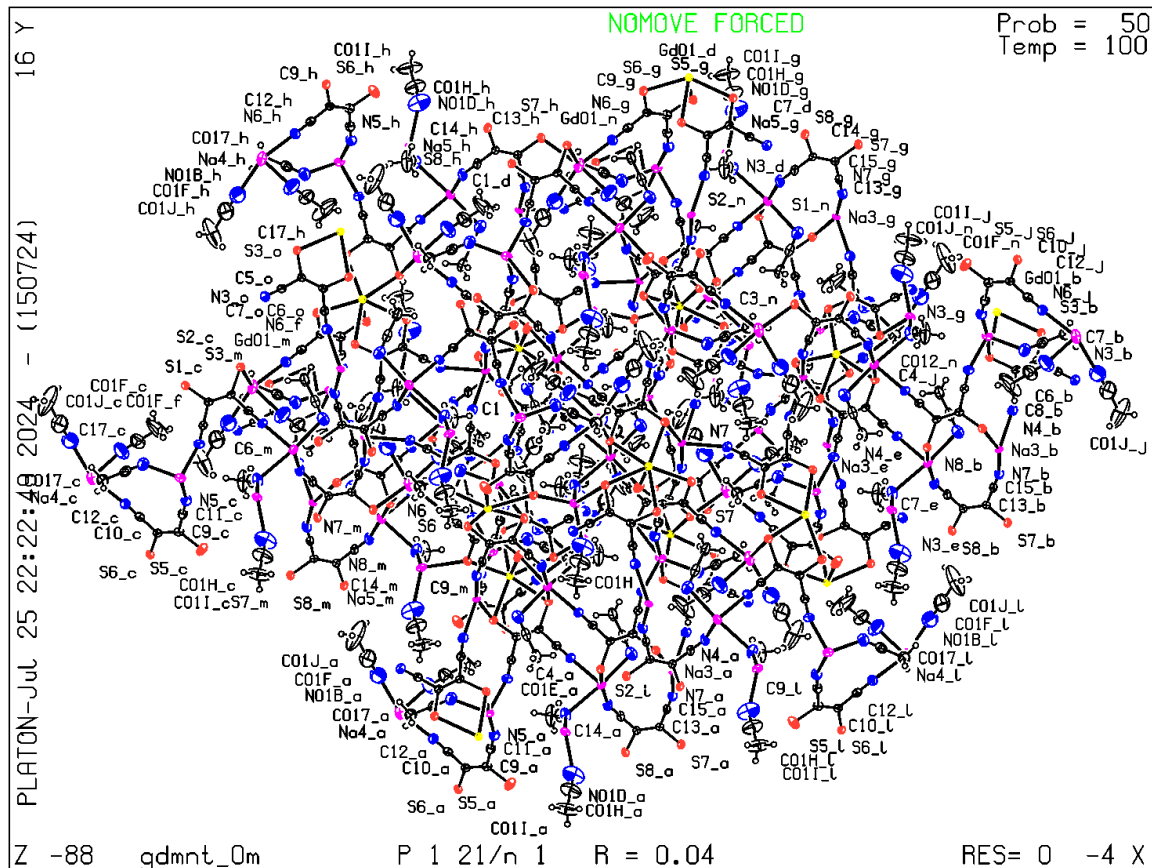

Supplement: Supplementary file 8 [file gd_beta_checkcif.pdf › finished cifs/gd_beta_checkcif.pdf]
