# Supplementary material for: Non–linear bonding trends in maleonitrile-1,2–dithiolate complexes of the transuranium actinides (An3+ = Np3+ – Cf3+ excl. Bk3+)
Source: Research Square preprint supplement (doi:10.21203/rs.3.rs-6100125/v1), 2025-03-05

## checkCIF/PLATON report

Structure factors have been supplied for datablock(s) cf\_mnt\_1\_0m

THIS REPORT IS FOR GUIDANCE ONLY. IF USED AS PART OF A REVIEW PROCEDURE FOR PUBLICATION, IT SHOULD NOT REPLACE THE EXPERTISE OF AN EXPERIENCED CRYSTALLOGRAPHIC REFEREE.

No syntax errors found. CIF dictionary Interpreting this report

**Datablock: cf\_mnt\_1\_0m**

|                 |                |                    |               |
|-----------------|----------------|--------------------|---------------|
| Bond precision: | C-C = 0.0044 Å | Wavelength=0.71073 |               |
| Cell:           | a=13.6393 (3)  | b=18.3172 (4)      | c=17.3594 (4) |
|                 | alpha=90       | beta=92.408 (1)    | gamma=90      |
| Temperature:    | 100 K          |                    |               |

|                        | Calculated            | Reported              |
|------------------------|-----------------------|-----------------------|
| Volume                 | 4333.14 (17)          | 4333.13 (17)          |
| Space group            | P 21/n                | P 1 21/n 1            |
| Hall group             | -P 2yn                | -P 2yn                |
| Moiety formula         | C28 H18 Cf N14 Na5 S8 | C28 H18 Cf N14 Na5 S8 |
| Sum formula            | C28 H18 Cf N14 Na5 S8 | C28 H18 Cf N14 Na5 S8 |
| Mr                     | 1174.08               | 1172.99               |
| Dx, g cm <sup>-3</sup> | 1.800                 | 1.798                 |
| Z                      | 4                     | 4                     |
| Mu (mm <sup>-1</sup> ) | 2.432                 | 2.432                 |
| F000                   | 2260.0                | 2260.0                |
| F000'                  | 2238.23               |                       |
| h, k, l <sub>max</sub> | 27, 36, 34            | 27, 36, 34            |
| Nref                   | 36411                 | 36302                 |
| Tmin, Tmax             | 0.747, 0.784          | 0.611, 0.749          |
| Tmin'                  | 0.615                 |                       |

```
Correction method= # Reported T Limits: Tmin=0.611 Tmax=0.749
AbsCorr = MULTI-SCAN
```

Data completeness= 0.997                      Theta (max)= 45.346

```
R(reflections)= 0.0420( 29799)      wR2(reflections)=
S = 1.108                          0.0910( 36302)
Npar= 511
```

---

The following ALERTS were generated. Each ALERT has the format

**test-name\_ALERT\_alert-type\_alert-level.**

Click on the hyperlinks for more details of the test.

---

#### Alert level A

|                   |       |                                  |                  |            |
|-------------------|-------|----------------------------------|------------------|------------|
| PLAT971_ALERT_2_A | Check | Calcd Resid. Dens.               | 0.53Ang From Cf1 | 5.52 eA-3  |
| PLAT971_ALERT_2_A | Check | Calcd Resid. Dens.               | 0.57Ang From Cf1 | 5.46 eA-3  |
| PLAT971_ALERT_2_A | Check | Calcd Resid. Dens.               | 0.57Ang From Cf1 | 5.46 eA-3  |
| PLAT971_ALERT_2_A | Check | Calcd Resid. Dens.               | 0.51Ang From Cf1 | 5.35 eA-3  |
| PLAT972_ALERT_2_A | Check | Calcd Resid. Dens.               | 1.15Ang From C28 | -6.19 eA-3 |
| PLAT973_ALERT_2_A | Check | Calcd Positive Resid. Density on | Cf1              | 4.10 eA-3  |
| PLAT975_ALERT_2_A | Check | Calcd Resid. Dens.               | 0.98Ang From N11 | 2.47 eA-3  |

---

#### Alert level B

|                   |            |                    |                         |            |
|-------------------|------------|--------------------|-------------------------|------------|
| PLAT220_ALERT_2_B | NonSolvent | Resd 1 C           | Ueq(max)/Ueq(min) Range | 7.9 Ratio  |
| PLAT971_ALERT_2_B | Check      | Calcd Resid. Dens. | 0.72Ang From Cf1        | 3.25 eA-3  |
| PLAT971_ALERT_2_B | Check      | Calcd Resid. Dens. | 0.63Ang From Cf1        | 3.23 eA-3  |
| PLAT971_ALERT_2_B | Check      | Calcd Resid. Dens. | 1.38Ang From C27        | 2.56 eA-3  |
| PLAT972_ALERT_2_B | Check      | Calcd Resid. Dens. | 1.15Ang From Na5        | -3.38 eA-3 |

---

#### Alert level C

|                   |                                                |                    |                                 |             |
|-------------------|------------------------------------------------|--------------------|---------------------------------|-------------|
| PLAT241_ALERT_2_C | High                                           | 'MainMol'          | Ueq as Compared to Neighbors of | N13 Check   |
| PLAT242_ALERT_2_C | Low                                            | 'MainMol'          | Ueq as Compared to Neighbors of | Na4 Check   |
| PLAT242_ALERT_2_C | Low                                            | 'MainMol'          | Ueq as Compared to Neighbors of | Na5 Check   |
| PLAT242_ALERT_2_C | Low                                            | 'MainMol'          | Ueq as Compared to Neighbors of | C19 Check   |
| PLAT242_ALERT_2_C | Low                                            | 'MainMol'          | Ueq as Compared to Neighbors of | C25 Check   |
| PLAT242_ALERT_2_C | Low                                            | 'MainMol'          | Ueq as Compared to Neighbors of | C27 Check   |
| PLAT906_ALERT_3_C | Large K Value in the Analysis of Variance      | .....              |                                 | 4.206 Check |
| PLAT924_ALERT_1_C | The Reported and Calculated Rho(min) Differ by | .                  |                                 | 1.41 eA-3   |
| PLAT971_ALERT_2_C | Check                                          | Calcd Resid. Dens. | 0.98Ang From N11                | 2.47 eA-3   |
| PLAT971_ALERT_2_C | Check                                          | Calcd Resid. Dens. | 1.77Ang From N11                | 2.12 eA-3   |
| PLAT971_ALERT_2_C | Check                                          | Calcd Resid. Dens. | 0.98Ang From C28                | 1.82 eA-3   |
| PLAT971_ALERT_2_C | Check                                          | Calcd Resid. Dens. | 1.23Ang From C28                | 1.76 eA-3   |
| PLAT971_ALERT_2_C | Check                                          | Calcd Resid. Dens. | 0.62Ang From Na3                | 1.51 eA-3   |
| PLAT971_ALERT_2_C | Check                                          | Calcd Resid. Dens. | 0.58Ang From Na3                | 1.51 eA-3   |

---

#### Alert level G

|                   |                                                  |                      |             |
|-------------------|--------------------------------------------------|----------------------|-------------|
| PLAT004_ALERT_5_G | Polymeric Structure Found with Maximum Dimension |                      | 3 Info      |
| PLAT083_ALERT_2_G | SHELXL Second Parameter in WGHT Unusually Large  |                      | 6.75 Why ?  |
| PLAT432_ALERT_2_G | Short Inter X...Y Contact                        | S5 ..S7              | 3.08 Ang.   |
|                   |                                                  | 5/2-x,1/2+y,3/2-z =  | 2_756 Check |
| PLAT780_ALERT_1_G | Coordinates do not Form a Properly Connected Set |                      | Please Do ! |
| PLAT910_ALERT_3_G | Missing # of FCF Reflection(s) Below Theta(Min). |                      | 4 Note      |
|                   | 1 1 0, -1 0 1, 1 0 1, 0 1 1,                     |                      |             |
| PLAT912_ALERT_4_G | Missing # of FCF Reflections Above STh/L=        | 0.600                | 106 Note    |
| PLAT933_ALERT_2_G | Number of HKL-OMIT Records in Embedded .res File |                      | 1 Note      |
|                   | 1 1 0,                                           |                      |             |
| PLAT941_ALERT_3_G | Average HKL Measurement Multiplicity             | .....                | 4.2 Low     |
| PLAT969_ALERT_5_G | The 'Henn et al.' R-Factor-gap value             | .....                | 2.290 Note  |
|                   | Predicted wr2: Based on SigI**2                  | 3.98 or SHELX Weight | 8.22        |
| PLAT978_ALERT_2_G | Number C-C Bonds with Positive Residual Density. |                      | 0 Info      |

---

```

7 ALERT level A = Most likely a serious problem - resolve or explain
5 ALERT level B = A potentially serious problem, consider carefully
14 ALERT level C = Check. Ensure it is not caused by an omission or oversight
10 ALERT level G = General information/check it is not something unexpected

2 ALERT type 1 CIF construction/syntax error, inconsistent or missing data
28 ALERT type 2 Indicator that the structure model may be wrong or deficient
3 ALERT type 3 Indicator that the structure quality may be low
1 ALERT type 4 Improvement, methodology, query or suggestion
2 ALERT type 5 Informative message, check

```

---

It is advisable to attempt to resolve as many as possible of the alerts in all categories. Often the minor alerts point to easily fixed oversights, errors and omissions in your CIF or refinement strategy, so attention to these fine details can be worthwhile. In order to resolve some of the more serious problems it may be necessary to carry out additional measurements or structure refinements. However, the purpose of your study may justify the reported deviations and the more serious of these should normally be commented upon in the discussion or experimental section of a paper or in the "special\_details" fields of the CIF. checkCIF was carefully designed to identify outliers and unusual parameters, but every test has its limitations and alerts that are not important in a particular case may appear. Conversely, the absence of alerts does not guarantee there are no aspects of the results needing attention. It is up to the individual to critically assess their own results and, if necessary, seek expert advice.

### Publication of your CIF in IUCr journals

A basic structural check has been run on your CIF. These basic checks will be run on all CIFs submitted for publication in IUCr journals (*Acta Crystallographica*, *Journal of Applied Crystallography*, *Journal of Synchrotron Radiation*); however, if you intend to submit to *Acta Crystallographica Section C* or *E* or *IUCrData*, you should make sure that full publication checks are run on the final version of your CIF prior to submission.

### Publication of your CIF in other journals

Please refer to the *Notes for Authors* of the relevant journal for any special instructions relating to CIF submission.

### Validation response form

Please find below a validation response form (VRF) that can be filled in and pasted into your CIF.

```

# start Validation Reply Form
_vrf_PLAT971_cf_mnt_1_0m
;
PROBLEM: Check Calcd Resid. Dens. 0.53Ang From Cf1 5.52 eA-3
RESPONSE: ...
;
_vrf_PLAT972_cf_mnt_1_0m
;
PROBLEM: Check Calcd Resid. Dens. 1.15Ang From C28 -6.19 eA-3
RESPONSE: ...

```

```

;
_vrf_PLAT973_cf_mnt_1_0m
;
PROBLEM: Check Calcd Positive Resid. Density on          Cf1          4.10 eA-3
RESPONSE: ...
;
_vrf_PLAT975_cf_mnt_1_0m
;
PROBLEM: Check Calcd Resid. Dens.  0.98Ang From N11      .          2.47 eA-3
RESPONSE: ...
;
_vrf_PLAT220_cf_mnt_1_0m
;
PROBLEM: NonSolvent   Resd 1   C   Ueq(max)/Ueq(min) Range          7.9 Ratio
RESPONSE: ...
;
# end Validation Reply Form

```

PLATON version of 15/07/2024; check.def file version of 15/07/2024

Datablock cf\_mnt\_1\_0m - ellipsoid plot

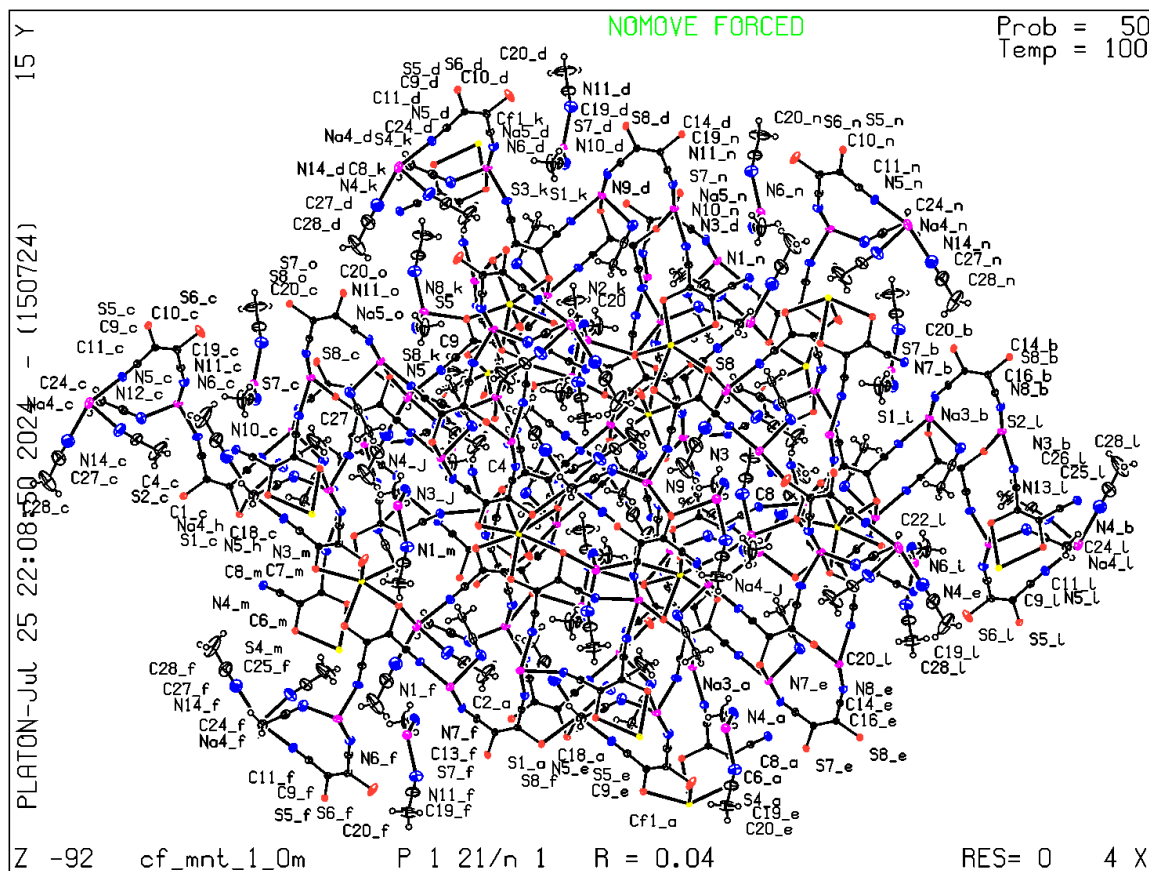

Supplement: Supplementary file 3 [file cf_beta_checkcif.pdf › finished cifs/cf_beta_checkcif.pdf]
