# Supplementary material for: Non–linear bonding trends in maleonitrile-1,2–dithiolate complexes of the transuranium actinides (An3+ = Np3+ – Cf3+ excl. Bk3+)
Source: Research Square preprint supplement (doi:10.21203/rs.3.rs-6100125/v1), 2025-03-05
Supplement: Supplementary file 6 [file 380b01e1a31502a73437d6e6.docx]

**Supplementary Information for**

**Non–linear bonding trends in maleonitrile-1,2–dithiolate complexes of the transuranium actinides (An+3 = Np3+ – Cf3+ excl. Bk3+)**

Nicholas B. Beck1, Cristian Celis–Barros2, Madeline C. Martelles1, Joseph M. Sperling1, Zhuanling Bai1, Jacob P. Brannon1, Daniela Gomez Martinez1, Zachary K. Huffman3, Brian N. Long4, Kacy N. Mendoza1, Robert W. Merinsky1, Brian M. Rotermund1, 5, Todd N. Poe6, Thomas E. Albrecht1, 7*.

1Colorado School of Mines, 1500 Illinois St, Golden, CO 80401

2Oak Ridge National Laboratory, 5200, 1 Bethel Valley Rd, Oak Ridge, TN 37830

3Duke Energy, Shearon Harris Nuclear Plant, New Hill, NC 27562

4Los Alamos National Laboratory, Los Alamos, NM 87545

5Idaho National Laboratory, Idaho Falls, ID 83415, USA

6Brookhaven National Laboratory, P.O. Box 5000, Upton, NY 11973

7Center for Radiation Chemistry Research, Idaho National Laboratory, Idaho Falls, P.O. Box 1625, 83415, USA

*thomas.albrecht@mines.edu

**Table of Contents**

**Reaction Photographs . . . . . . . . . . . . . . . . . . . . . . . . . . . . . . . . . . . . . . . . . . . . . . . . . . . . . . . . . S2**

**Crystallographic Information . . . . . . . . . . . . . . . . . . . . . . . . . . . . . . . . . . . . . . . . . . . . . . . . . . S4**

**Packing Structure . . . . . . . . . . . . . . . . . . . . . . . . . . . . . . . . . . . . . . . . . . . . . . . . . . . . . . . . . . . S18**

**Bond Length Tables . . . . . . . . . . . . . . . . . . . . . . . . . . . . . . . . . . . . . . . . . . . . . . . . . . . . . . . . . S20**

**Powder X-ray Diffraction Patterns . . . . . . . . . . . . . . . . . . . . . . . . . . . . . . . . . . . . . . . . . . . . . S25**

**UV-Vis-NIR Absorption Spectra . . . . . . . . . . . . . . . . . . . . . . . . . . . . . . . . . . . . . . . . . . . . . . . S33**

**Raman Spectra . . . . . . . . . . . . . . . . . . . . . . . . . . . . . . . . . . . . . . . . . . . . . . . . . . . . . . . . . . . . . S50**

**Computational Data . . . . . . . . . . . . . . . . . . . . . . . . . . . . . . . . . . . . . . . . . . . . . . . . . . . . . . . . . . S55**


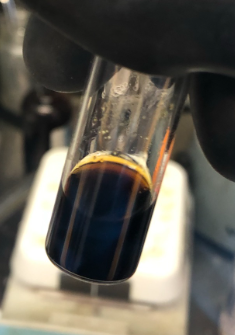

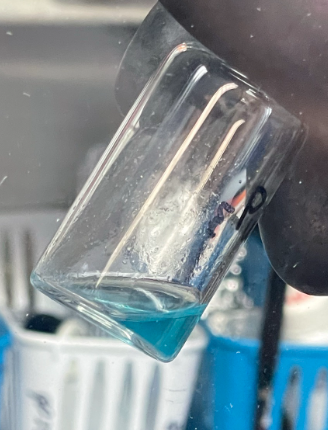

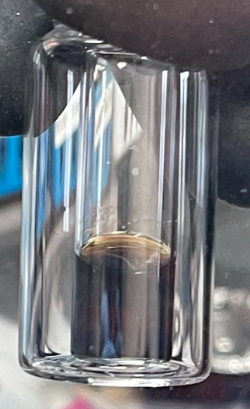


**a)**

**b)**

**c)**

**Figure S2**. a) Solution of [Np(mnt)4]5– in MeCN. b) Solution of PuI3 in MeCN. c) Solution of [Pu(mnt)4]5– in MeCN.


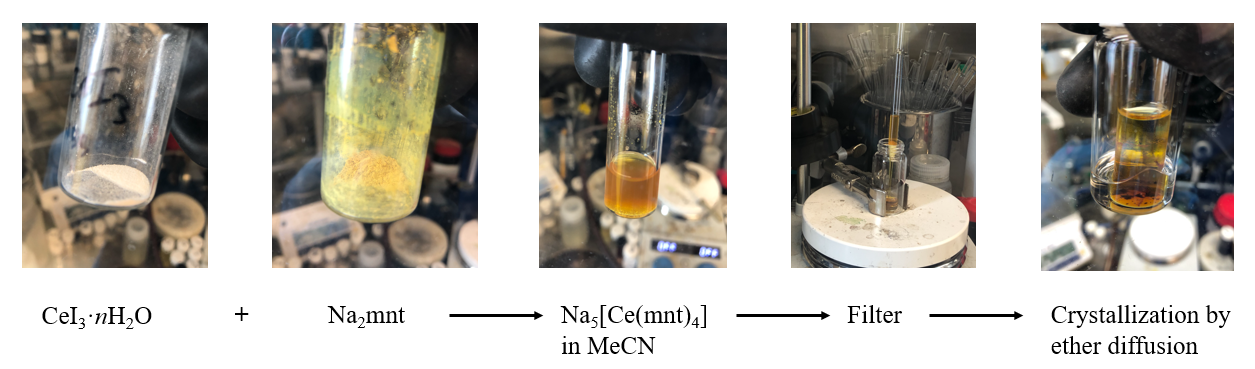


**Figure S1.** Synthesis of **Ce-α**.

**Figure S3.** Image of a) AmI3∙nH2O residue, b) Na5[Am(mnt)4] solution in MeCN, c) **Am–α** after crystallizing overnight, d) a single crystal of **Αm–α**.

a)

b)

c)

d)


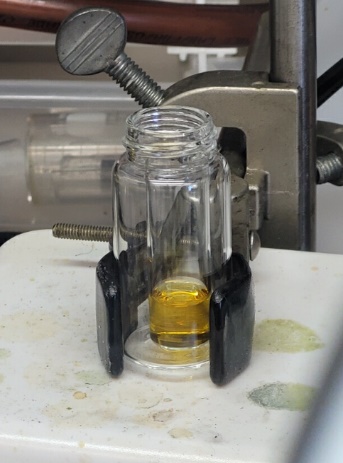

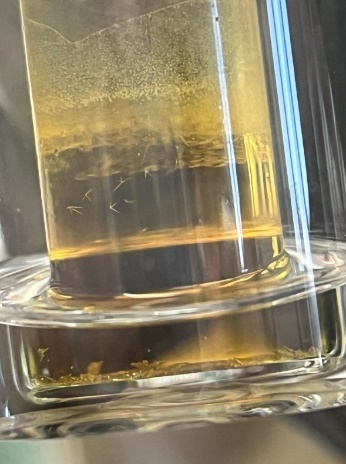

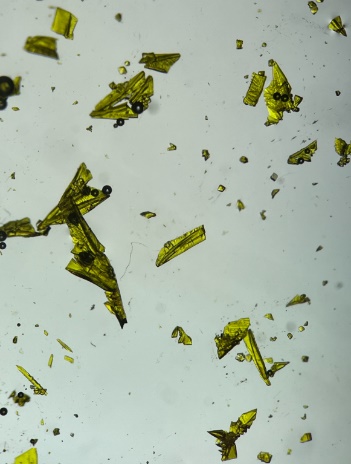


a)

b)

c)

**Figure S4.** Images of the reaction. a) Na5[Cm(mnt)4] solution in MeCN. b) Crystals formed after vapor diffusion. c) Crystals of **Cm–α** and **Cm–β**.


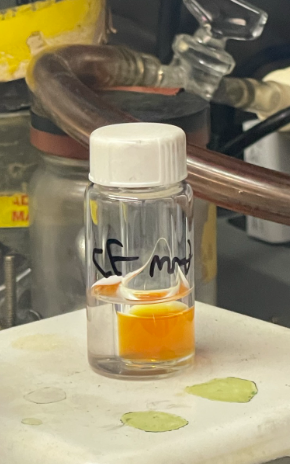

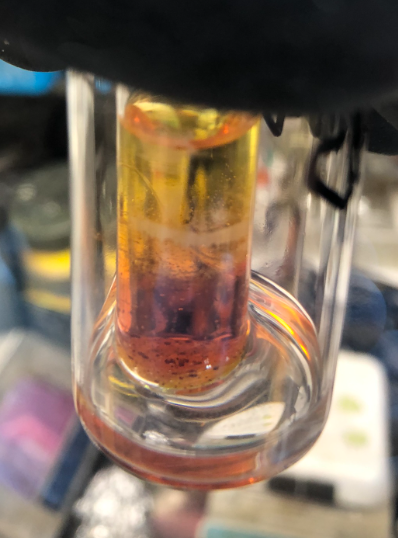


a)

b)

**Figure S5.** a) The reaction solution after filtration. b) Reaction mixture after vapor diffusion showing crystals of **Cf–β**.

**Table S1. La-α crystallographic data**

| Temperature/K | 100.00 |
| --- | --- |
| Crystal system | monoclinic |
| Space group | *C*2*/c* |
| a/Å | 36.5860(9) |
| b/Å | 13.7473(3) |
| c/Å | 19.4992(5) |
| α/° | 90 |
| β/° | 109.1520(10) |
| γ/° | 90 |
| Volume/Å3 | 9264.5(4) |
| Z | 8 |
| ρcalcg/cm3 | 1.491 |
| μ/mm**–**1 | 1.367 |
| F(000) | 4036.0 |
| Crystal size/mm3 | 0.2 × 0.2 × 0.1 |
| Radiation | MoK*α* (λ = 0.71073 Å) |
| 2Θ range for data collection/° | 3.654 to 70.948 |
| Index ranges | **–**59 ≤ h ≤ 59, **–**22 ≤ k ≤ 22, **–**31 ≤ l ≤ 31 |
| Reflections collected | 179669 |
| Independent reflections | 21096 [Rint = 0.0376, Rsigma = 0.0210] |
| Data/restraints/parameters | 21096/0/619 |
| Goodness-of-fit on F2 | 1.055 |
| Final R indexes [I≥2σ (I)] | R1 = 0.0304, wR2 = 0.0744 |
| Final R indexes [all data] | R1 = 0.0379, wR2 = 0.0777 |
| Largest diff. peak/hole / e Å**–**3 | 1.46/**–**1.79 |

**Table S2. Ce-α crystallographic data**

| Temperature/K | 100.00 |
| --- | --- |
| Crystal system | monoclinic |
| Space group | *C*2*/c* |
| a/Å | 36.555(3) |
| b/Å | 13.7610(11) |
| c/Å | 19.5407(15) |
| α/° | 90 |
| β/° | 109.116(2) |
| γ/° | 90 |
| Volume/Å3 | 9287.6(13) |
| Z | 8 |
| ρcalcg/cm3 | 1.493 |
| μ/mm**–**1 | 1.424 |
| F(000) | 4056.0 |
| Crystal size/mm3 | 0.2 × 0.2 × 0.1 |
| Radiation | MoK*α* (λ = 0.71073 Å) |
| 2Θ range for data collection/° | 3.648 to 71.388 |
| Index ranges | **–**59 ≤ h ≤ 59, **–**22 ≤ k ≤ 22, **–**32 ≤ l ≤ 32 |
| Reflections collected | 203886 |
| Independent reflections | 21446 [Rint = 0.0580, Rsigma = 0.0308] |
| Data/restraints/parameters | 21446/42/598 |
| Goodness-of-fit on F2 | 1.043 |
| Final R indexes [I≥2σ (I)] | R1 = 0.0360, wR2 = 0.0808 |
| Final R indexes [all data] | R1 = 0.0504, wR2 = 0.0865 |
| Largest diff. peak/hole / e Å**–**3 | 1.86/**–**1.86 |

**Table S3. Pr-α crystallographic data**

| Temperature/K | 100.00 |
| --- | --- |
| Crystal system | monoclinic |
| Space group | *C*2*/c* |
| a/Å | 36.3329(12) |
| b/Å | 13.7118(5) |
| c/Å | 19.4577(7) |
| α/° | 90 |
| β/° | 108.9990(10) |
| γ/° | 90 |
| Volume/Å3 | 9165.5(6) |
| Z | 8 |
| ρcalcg/cm3 | 1.514 |
| μ/mm**–**1 | 1.513 |
| F(000) | 4062.0 |
| Crystal size/mm3 | 0.2 × 0.2 × 0.1 |
| Radiation | MoK*α* (λ = 0.71073 Å) |
| 2Θ range for data collection/° | 4.742 to 78.992 |
| Index ranges | **–**64 ≤ h ≤ 64, **–**24 ≤ k ≤ 24, **–**34 ≤ l ≤ 34 |
| Reflections collected | 210363 |
| Independent reflections | 27431 [Rint = 0.0492, Rsigma = 0.0291] |
| Data/restraints/parameters | 27431/0/599 |
| Goodness-of-fit on F2 | 1.079 |
| Final R indexes [I≥2σ (I)] | R1 = 0.0326, wR2 = 0.0675 |
| Final R indexes [all data] | R1 = 0.0454, wR2 = 0.0713 |
| Largest diff. peak/hole / e Å**–**3 | 1.90/**–**2.12 |

**Table S4. Nd-α crystallographic data**

| Temperature/K | 100.00 |
| --- | --- |
| Crystal system | monoclinic |
| Space group | *C*2*/c* |
| a/Å | 36.2857(17) |
| b/Å | 13.7022(6) |
| c/Å | 19.4470(9) |
| α/° | 90 |
| β/° | 108.918(2) |
| γ/° | 90 |
| Volume/Å3 | 9146.6(7) |
| Z | 8 |
| ρcalcg/cm3 | 1.525 |
| μ/mm**–**1 | 1.586 |
| F(000) | 4079.0 |
| Crystal size/mm3 | 0.21 × 0.19 × 0.179 |
| Radiation | MoK*α* (λ = 0.71073 Å) |
| 2Θ range for data collection/° | 4.638 to 80.618 |
| Index ranges | **–**65 ≤ h ≤ 66, **–**24 ≤ k ≤ 24, **–**35 ≤ l ≤ 35 |
| Reflections collected | 169752 |
| Independent reflections | 28829 [Rint = 0.0751, Rsigma = 0.0477] |
| Data/restraints/parameters | 28829/0/579 |
| Goodness-of-fit on F2 | 1.036 |
| Final R indexes [I≥2σ (I)] | R1 = 0.0398, wR2 = 0.0944 |
| Final R indexes [all data] | R1 = 0.0543, wR2 = 0.1035 |
| Largest diff. peak/hole / e Å**–**3 | 1.42/**–**2.22 |

**Table S5. Sm-α crystallographic data**

| Temperature/K | 100.00 |
| --- | --- |
| Crystal system | monoclinic |
| Space group | *C*2*/c* |
| a/Å | 36.283(2) |
| b/Å | 13.6371(9) |
| c/Å | 19.4532(11) |
| α/° | 90 |
| β/° | 108.757(2) |
| γ/° | 90 |
| Volume/Å3 | 9114.2(10) |
| Z | 8 |
| ρcalcg/cm3 | 1.537 |
| μ/mm**–**1 | 1.741 |
| F(000) | 4088.0 |
| Crystal size/mm3 | 0.2 × 0.2 × 0.1 |
| Radiation | MoK*α* (λ = 0.71073 Å) |
| 2Θ range for data collection/° | 5.344 to 61.068 |
| Index ranges | **–**51 ≤ h ≤ 51, **–**19 ≤ k ≤ 19, **–**27 ≤ l ≤ 27 |
| Reflections collected | 143235 |
| Independent reflections | 13917 [Rint = 0.0528, Rsigma = 0.0258] |
| Data/restraints/parameters | 13917/0/572 |
| Goodness-of-fit on F2 | 1.043 |
| Final R indexes [I≥2σ (I)] | R1 = 0.0266, wR2 = 0.0645 |
| Final R indexes [all data] | R1 = 0.0312, wR2 = 0.0668 |
| Largest diff. peak/hole / e Å**–**3 | 1.23/**–**1.35 |

**Table S6. Eu-α crystallographic data**

| Temperature/K | 100.00 |
| --- | --- |
| Crystal system | monoclinic |
| Space group | *C*2*/c* |
| a/Å | 36.199(2) |
| b/Å | 13.5964(8) |
| c/Å | 19.4534(10) |
| α/° | 90 |
| β/° | 108.732(2) |
| γ/° | 90 |
| Volume/Å3 | 9067.3(9) |
| Z | 8 |
| ρcalcg/cm3 | 1.556 |
| μ/mm**–**1 | 1.839 |
| F(000) | 4120.0 |
| Crystal size/mm3 | 0.2 × 0.2 × 0.1 |
| Radiation | MoK*α* (λ = 0.71073 Å) |
| 2Θ range for data collection/° | 5.154 to 51.402 |
| Index ranges | **–**44 ≤ h ≤ 44, **–**16 ≤ k ≤ 16, **–**23 ≤ l ≤ 23 |
| Reflections collected | 76132 |
| Independent reflections | 8601 [Rint = 0.0537, Rsigma = 0.0277] |
| Data/restraints/parameters | 8601/54/585 |
| Goodness-of-fit on F2 | 1.045 |
| Final R indexes [I≥2σ (I)] | R1 = 0.0271, wR2 = 0.0735 |
| Final R indexes [all data] | R1 = 0.0294, wR2 = 0.0753 |
| Largest diff. peak/hole / e Å**–**3 | 0.78/**–**1.19 |

**Table S7. Gd-β crystallographic data**

| Temperature/K | 100.00 |
| --- | --- |
| Crystal system | monoclinic |
| Space group | *P*21*/n* |
| a/Å | 13.6798(7) |
| b/Å | 18.3572(9) |
| c/Å | 17.5889(10) |
| α/° | 90 |
| β/° | 92.146(2) |
| γ/° | 90 |
| Volume/Å3 | 4413.9(4) |
| Z | 4 |
| ρcalcg/cm3 | 1.624 |
| μ/mm**–**1 | 1.970 |
| F(000) | 2124.0 |
| Crystal size/mm3 | 0.2 × 0.2 × 0.1 |
| Radiation | MoK*α* (λ = 0.71073 Å) |
| 2Θ range for data collection/° | 5.138 to 52.744 |
| Index ranges | **–**17 ≤ h ≤ 17, **–**22 ≤ k ≤ 22, **–**21 ≤ l ≤ 21 |
| Reflections collected | 74142 |
| Independent reflections | 8914 [Rint = 0.0768, Rsigma = 0.0427] |
| Data/restraints/parameters | 8914/4/511 |
| Goodness-of-fit on F2 | 1.023 |
| Final R indexes [I≥2σ (I)] | R1 = 0.0439, wR2 = 0.1124 |
| Final R indexes [all data] | R1 = 0.0534, wR2 = 0.1199 |
| Largest diff. peak/hole / e Å**–**3 | 1.94/**–**1.96 |

**Table S8. Dy-β crystallographic data**

| Temperature/K | 100.00 |
| --- | --- |
| Crystal system | monoclinic |
| Space group | *P*21*/n* |
| a/Å | 13.6517(5) |
| b/Å | 18.3713(7) |
| c/Å | 17.5608(7) |
| α/° | 90 |
| β/° | 92.0630(10) |
| γ/° | 90 |
| Volume/Å3 | 4401.4(3) |
| Z | 4 |
| ρcalcg/cm3 | 1.609 |
| μ/mm**–**1 | 2.166 |
| F(000) | 2060.0 |
| Crystal size/mm3 | 0.2 × 0.1 × 0.1 |
| Radiation | MoK*α* (λ = 0.71073 Å) |
| 2Θ range for data collection/° | 4.44 to 63.09 |
| Index ranges | **–**20 ≤ h ≤ 20, **–**27 ≤ k ≤ 27, **–**25 ≤ l ≤ 25 |
| Reflections collected | 115015 |
| Independent reflections | 14672 [Rint = 0.0361, Rsigma = 0.0214] |
| Data/restraints/parameters | 14672/0/506 |
| Goodness-of-fit on F2 | 1.177 |
| Final R indexes [I≥2σ (I)] | R1 = 0.0377, wR2 = 0.0998 |
| Final R indexes [all data] | R1 = 0.0491, wR2 = 0.1099 |
| Largest diff. peak/hole / e Å**–**3 | 1.64/**–**0.88 |

**Table S9. Np-β crystallographic data**

| Temperature/K | 100.00 |
| --- | --- |
| Crystal system | monoclinic |
| Space group | *P*21*/n* |
| a/Å | 14.0465(4) |
| b/Å | 18.5992(5) |
| c/Å | 18.0751(5) |
| α/° | 90 |
| β/° | 91.7110(10) |
| γ/° | 90 |
| Volume/Å3 | 4720.1(2) |
| Z | 4 |
| ρcalcg/cm3 | 1.719 |
| μ/mm**–**1 | 3.034 |
| F(000) | 2328.0 |
| Crystal size/mm3 | 0.229 × 0.185 × 0.18 |
| Radiation | MoK*α* (λ = 0.71073 Å) |
| 2Θ range for data collection/° | 3.634 to 72.678 |
| Index ranges | **–**23 ≤ h ≤ 23, **–**30 ≤ k ≤ 30, **–**29 ≤ l ≤ 30 |
| Reflections collected | 108923 |
| Independent reflections | 22697 [Rint = 0.0366, Rsigma = 0.0304] |
| Data/restraints/parameters | 22697/63/533 |
| Goodness-of-fit on F2 | 1.065 |
| Final R indexes [I≥2σ (I)] | R1 = 0.0425, wR2 = 0.1061 |
| Final R indexes [all data] | R1 = 0.0600, wR2 = 0.1144 |
| Largest diff. peak/hole / e Å**–**3 | 1.79/**–**2.44 |

**Table S10. Pu-β crystallographic data**

| Temperature/K | 100.00 |
| --- | --- |
| Crystal system | monoclinic |
| Space group | *P*21*/n* |
| a/Å | 14.1718(10) |
| b/Å | 18.5779(11) |
| c/Å | 18.0434(11) |
| α/° | 90 |
| β/° | 91.772(2) |
| γ/° | 90 |
| Volume/Å3 | 4748.2(5) |
| Z | 4 |
| ρcalcg/cm3 | 1.741 |
| μ/mm**–**1 | 2.217 |
| F(000) | 2404.0 |
| Crystal size/mm3 | 0.28 × 0.17 × 0.076 |
| Radiation | MoK*α* (λ = 0.71073 Å) |
| 2Θ range for data collection/° | 3.616 to 57.5 |
| Index ranges | **–**19 ≤ h ≤ 19, **–**25 ≤ k ≤ 25, **–**24 ≤ l ≤ 24 |
| Reflections collected | 121100 |
| Independent reflections | 12305 [Rint = 0.0446, Rsigma = 0.0234] |
| Data/restraints/parameters | 12305/45/539 |
| Goodness-of-fit on F2 | 1.132 |
| Final R indexes [I≥2σ (I)] | R1 = 0.0456, wR2 = 0.1026 |
| Final R indexes [all data] | R1 = 0.0561, wR2 = 0.1080 |
| Largest diff. peak/hole / e Å**–**3 | 1.79/**–**1.77 |

**Table S11. Am-α crystallographic data**

| Temperature/K | 100.00 |
| --- | --- |
| Crystal system | monoclinic |
| Space group | *C*2*/c* |
| a/Å | 36.1508(8) |
| b/Å | 13.6587(3) |
| c/Å | 19.4218(4) |
| α/° | 90 |
| β/° | 108.9560(10) |
| γ/° | 90 |
| Volume/Å3 | 9069.9(3) |
| Z | 8 |
| ρcalcg/cm3 | 1.681 |
| μ/mm**–**1 | 2.146 |
| F(000) | 4354.0 |
| Crystal size/mm3 | 0.419 × 0.27 × 0.217 |
| Radiation | MoK*α* (λ = 0.71073 Å) |
| 2Θ range for data collection/° | 5.352 to 90.692 |
| Index ranges | **–**72 ≤ h ≤ 70, **–**27 ≤ k ≤ 27, **–**38 ≤ l ≤ 38 |
| Reflections collected | 447921 |
| Independent reflections | 38037 [Rint = 0.0378, Rsigma = 0.0164] |
| Data/restraints/parameters | 38037/84/655 |
| Goodness-of-fit on F2 | 1.062 |
| Final R indexes [I≥2σ (I)] | R1 = 0.0222, wR2 = 0.0516 |
| Final R indexes [all data] | R1 = 0.0265, wR2 = 0.0531 |
| Largest diff. peak/hole / e Å**–**3 | 4.33/**–**3.31 |

**Table S12. Cm-α crystallographic data**

| Temperature/K | 100.00 |
| --- | --- |
| Crystal system | monoclinic |
| Space group | *C*2*/c* |
| a/Å | 36.2631(14) |
| b/Å | 13.4983(5) |
| c/Å | 19.4223(8) |
| α/° | 90 |
| β/° | 108.573(2) |
| γ/° | 90 |
| Volume/Å3 | 9011.9(6) |
| Z | 8 |
| ρcalcg/cm3 | 1.674 |
| μ/mm**–**1 | 2.265 |
| F(000) | 4312.0 |
| Crystal size/mm3 | 0.2 × 0.2 × 0.1 |
| Radiation | MoK*α* (λ = 0.71073 Å) |
| 2Θ range for data collection/° | 3.706 to 72.8 |
| Index ranges | **–**60 ≤ h ≤ 60, **–**22 ≤ k ≤ 22, **–**32 ≤ l ≤ 32 |
| Reflections collected | 94664 |
| Independent reflections | 21956 [Rint = 0.0454, Rsigma = 0.0357] |
| Data/restraints/parameters | 21956/24/591 |
| Goodness-of-fit on F2 | 1.036 |
| Final R indexes [I≥2σ (I)] | R1 = 0.0322, wR2 = 0.0734 |
| Final R indexes [all data] | R1 = 0.0433, wR2 = 0.0783 |
| Largest diff. peak/hole / e Å**–**3 | 2.26/**–**1.58 |

**Table S13. Cm-β crystallographic data**

| Temperature/K | 100.00 |
| --- | --- |
| Crystal system | monoclinic |
| Space group | *P*21*/n* |
| a/Å | 13.7182(5) |
| b/Å | 18.3443(7) |
| c/Å | 17.4906(6) |
| α/° | 90 |
| β/° | 92.4140(10) |
| γ/° | 90 |
| Volume/Å3 | 4397.6(3) |
| Z | 4 |
| ρcalcg/cm3 | 1.734 |
| μ/mm**–**1 | 2.322 |
| F(000) | 2180.0 |
| Crystal size/mm3 | 0.172 × 0.161 × 0.072 |
| Radiation | MoK*α* (λ = 0.71073 Å) |
| 2Θ range for data collection/° | 3.698 to 66.466 |
| Index ranges | **–**21 ≤ h ≤ 21, **–**28 ≤ k ≤ 28, **–**26 ≤ l ≤ 26 |
| Reflections collected | 95942 |
| Independent reflections | 16847 [Rint = 0.0572, Rsigma = 0.0416] |
| Data/restraints/parameters | 16847/0/505 |
| Goodness-of-fit on F2 | 1.069 |
| Final R indexes [I≥2σ (I)] | R1 = 0.0390, wR2 = 0.0817 |
| Final R indexes [all data] | R1 = 0.0552, wR2 = 0.0878 |
| Largest diff. peak/hole / e Å**–**3 | 1.80/**–**1.40 |

**Table S14. Cf-β crystallographic data**

| Temperature/K | 100.00 |
| --- | --- |
| Crystal system | monoclinic |
| Space group | *P*21*/n* |
| a/Å | 13.6393(3) |
| b/Å | 18.3172(4) |
| c/Å | 17.3594(4) |
| α/° | 90 |
| β/° | 92.4080(10) |
| γ/° | 90 |
| Volume/Å3 | 4333.13(17) |
| Z | 4 |
| ρcalcg/cm3 | 1.798 |
| μ/mm**–**1 | 2.432 |
| F(000) | 2260.0 |
| Crystal size/mm3 | 0.2 × 0.1 × 0.1 |
| Radiation | MoK*α* (λ = 0.71073 Å) |
| 2Θ range for data collection/° | 4.336 to 90.692 |
| Index ranges | **–**27 ≤ h ≤ 25, **–**36 ≤ k ≤ 36, **–**34 ≤ l ≤ 34 |
| Reflections collected | 153199 |
| Independent reflections | 36302 [Rint = 0.0511, Rsigma = 0.0395] |
| Data/restraints/parameters | 36302/0/511 |
| Goodness-of-fit on F2 | 1.108 |
| Final R indexes [I≥2σ (I)] | R1 = 0.0420, wR2 = 0.0858 |
| Final R indexes [all data] | R1 = 0.0566, wR2 = 0.0910 |
| Largest diff. peak/hole / e Å**–**3 | 5.79/**–**4.78 |


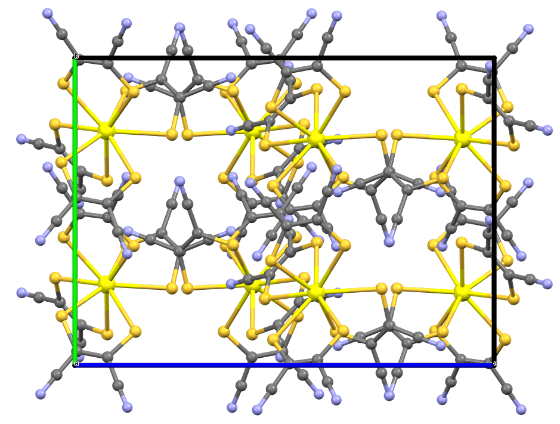

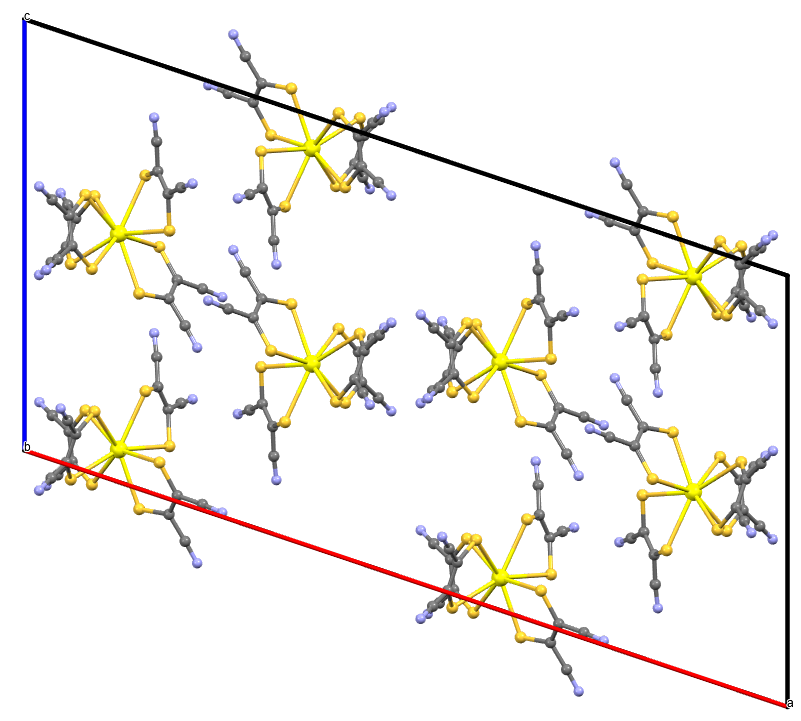

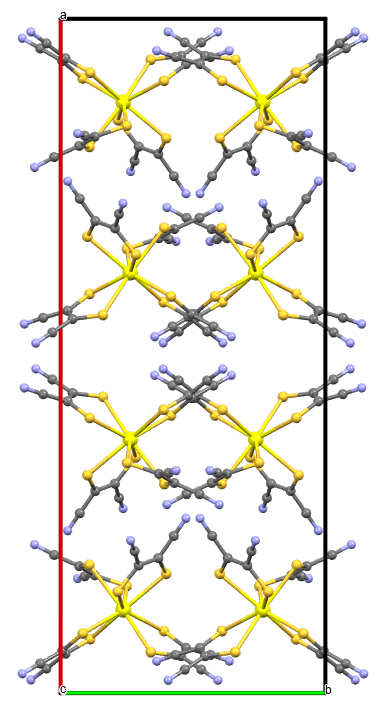


**Figure S6.** Packing structure of the [M(mnt)4]5− complexes in the α-structure as viewed along the *a-*, *b-*, and *c-* axes. Sodium ions and acetonitrile molecules were omitted for clarity.

**a**

**c**

**b**


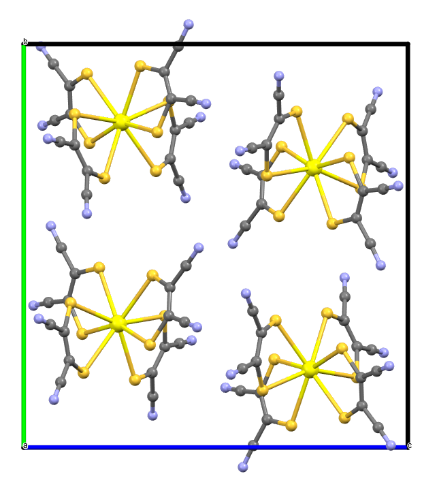

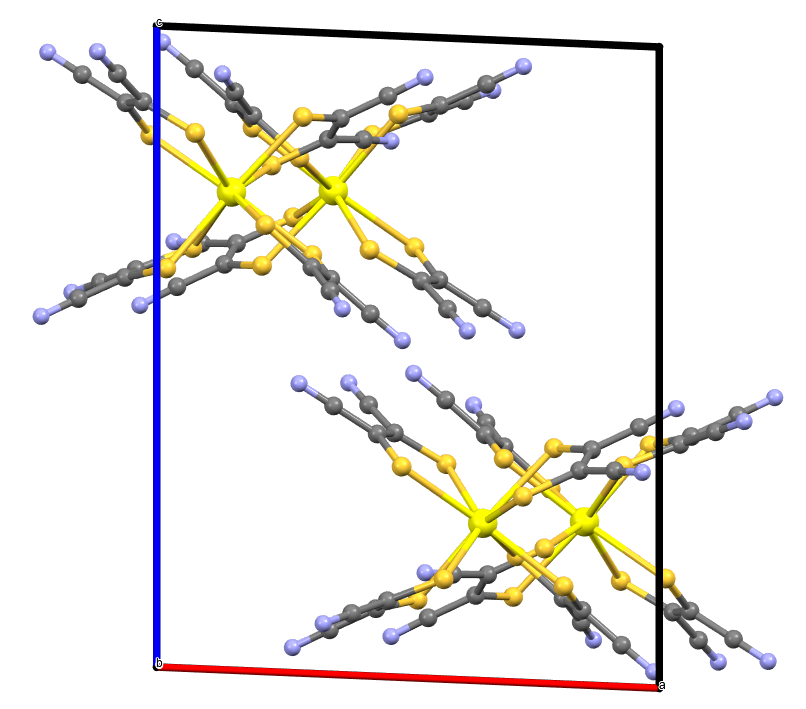

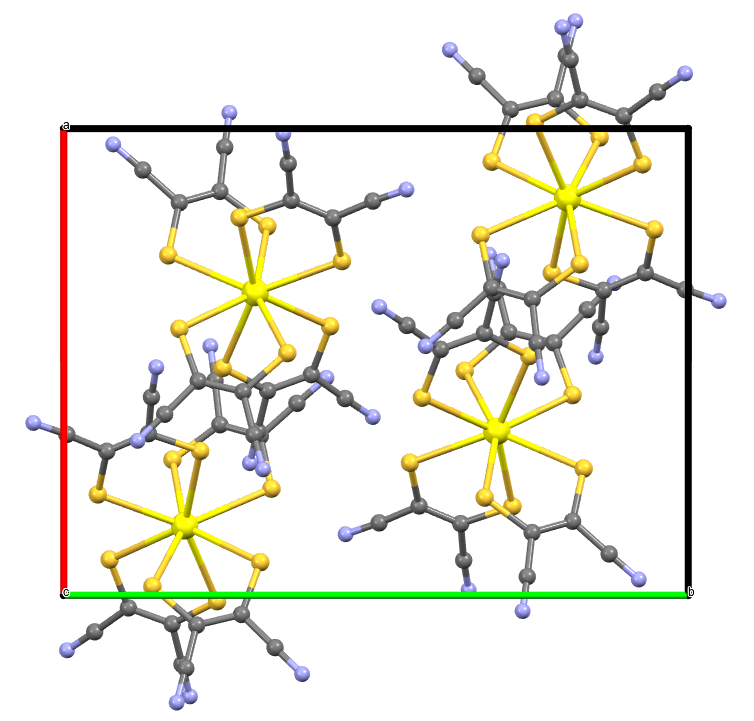


**Figure S7.** Packing structure of the [M(mnt)4]5− complexes in the β-structure as viewed along the *a-*, *b-*, and *c-* axes. Sodium ions and acetonitrile molecules were omitted for clarity.

**a**

**c**

**b**

**Table S17.** Bond lengths and angles in **Pr-α**

| mnt2− Ligand | Fold Angle (degrees) | Bond | Bond Length (Å) | Bond | Bond Length (Å) | Bond | Bond Length (Å) |
| --- | --- | --- | --- | --- | --- | --- | --- |
| 1 | 1.93 | Pr-S1 | 2.9329(12) | C1-S1 | 1.721(4) | C1-C2 | 1.375(6) |
| Pr-S2 | 2.9267(9) | C2-S2 | 1.735(4) |
| 2 | 14.30 | Pr-S3 | 2.9633(12) | C5-S3 | 1.739(4) | C5-C6 | 1.368(6) |
| Pr-S4 | 2.8972(9) | C6-S4 | 1.733(4) |
| 3 | 22.66 | Pr-S5 | 2.9309(9) | C9-S5 | 1.732(4) | C9-C10 | 1.368(6) |
| Pr-S6 | 2.9552(12) | C10-S6 | 1.738(4) |
| 4 | 41.14 | Pr-S7 | 2.9219(12) | C13-S7 | 1.736(4) | C13-C14 | 1.369(6) |
| Pr-S8 | 2.9094(9) | C14-S8 | 1.737(4) |
| Averages | | | 2.9297(10) |  | 1.733(4) |  | 1.370(6) |

**Table S16.** Bond lengths and angles in **Ce-α**

| mnt2− Ligand | Fold Angle (degrees) | Bond | Bond Length (Å) | Bond | Bond Length (Å) | Bond | Bond Length (Å) |
| --- | --- | --- | --- | --- | --- | --- | --- |
| 1 | 1.37 | Ce-S1 | 2.9449(15) | C1-S1 | 1.736(6) | C1-C2 | 1.375(9) |
| Ce-S2 | 2.9463(15) | C2-S2 | 1.720(6) |
| 2 | 14.23 | Ce-S3 | 2.9189(15) | C5-S3 | 1.734(6) | C5-C6 | 1.367(9) |
| Ce-S4 | 2.9787(15) | C6-S4 | 1.738(6) |
| 3 | 22.41 | Ce-S5 | 2.9801(18) | C9-S5 | 1.739(6) | C9-C10 | 1.364(9) |
| Ce-S6 | 2.9528(15) | C10-S6 | 1.736(6) |
| 4 | 41.28 | Ce-S7 | 2.9340(15) | C13-S7 | 1.737(6) | C13-C14 | 1.369(9) |
| Ce-S8 | 2.9397(15) | C14-S8 | 1.738(6) |
| Averages | | | 2.9494(15) |  | 1.735(6) |  | 1.369(9) |

**Table S15.** Bond lengths and angles in **La-α**

| mnt2− Ligand | Fold Angle (degrees) | Bond | Bond Length (Å) | Bond | Bond Length (Å) | Bond | Bond Length (Å) |
| --- | --- | --- | --- | --- | --- | --- | --- |
| 1 | 1.37 | La-S1 | 2.9697(12) | C1-S1 | 1.722(4) | C1-C2 | 1.377(6) |
| La-S2 | 2.9722(12) | C2-S2 | 1.736(4) |
| 2 | 14.72 | La-S3 | 3.0085(12) | C5-S3 | 1.736(5) | C5-C6 | 1.366(6) |
| La-S4 | 2.9394(12) | C6-S4 | 1.735(5) |
| 3 | 21.80 | La-S5 | 2.9741(12) | C9-S5 | 1.733(5) | C9-C10 | 1.367(6) |
| La-S6 | 2.9988(15) | C10-S6 | 1.734(5) |
| 4 | 42.55 | La-S7 | 2.9595(12) | C13-S7 | 1.738(5) | C13-C14 | 1.368(6) |
| La-S8 | 2.9613(12) | C14-S8 | 1.736(5) |
| Averages | | | 2.9729(12) |  | 1.734(5) |  | 1.369(6) |

**Table S20.** Bond lengths and angles in **Eu-α**

| mnt2− Ligand | Fold Angle (degrees) | Bond | Bond Length (Å) | Bond | Bond Length (Å) | Bond | Bond Length (Å) |
| --- | --- | --- | --- | --- | --- | --- | --- |
| 1 | 1.67 | Eu-S1 | 2.881(2) | C1-S1 | 1.721(9) | C1-C2 | 1.372(12) |
| Eu-S2 | 2.866(2) | C2-S2 | 1.738(9) |
| 2 | 14.18 | Eu-S3 | 2.908(2) | C5-S3 | 1.742(9) | C5-C6 | 1.358(12) |
| Eu-S4 | 2.849(2) | C6-S4 | 1.734(9) |
| 3 | 23.04 | Eu-S5 | 2.886(2) | C9-S5 | 1.735(9) | C9-C10 | 1.364(12) |
| Eu-S6 | 2.904(2) | C10-S6 | 1.742(9) |
| 4 | 40.18 | Eu-S7 | 2.883(2) | C13-S7 | 1.740(9) | C13-C14 | 1.363(12) |
| Eu-S8 | 2.859(2) | C14-S8 | 1.733(9) |
| Averages | | | 2.879(2) |  | 1.736(9) |  | 1.364(12) |

**Table S19.** Bond lengths and angles in **Sm-α**

| mnt2− Ligand | Fold Angle (degrees) | Bond | Bond Length (Å) | Bond | Bond Length (Å) | Bond | Bond Length (Å) |
| --- | --- | --- | --- | --- | --- | --- | --- |
| 1 | 1.70 | Sm-S1 | 2.8938(15) | C1-S1 | 1.721(6) | C1-C2 | 1.371(9) |
| Sm-S2 | 2.8807(15) | C2-S2 | 1.737(6) |
| 2 | 14.26 | Sm-S3 | 2.9220(15) | C5-S3 | 1.743(6) | C5-C6 | 1.367(9) |
| Sm-S4 | 2.8611(15) | C6-S4 | 1.733(6) |
| 3 | 23.00 | Sm-S5 | 2.8979(15) | C9-S5 | 1.733(6) | C9-C10 | 1.367(9) |
| Sm-S6 | 2.9192(15) | C10-S6 | 1.739(6) |
| 4 | 40.12 | Sm-S7 | 2.8903(15) | C13-S7 | 1.738(6) | C13-C14 | 1.365(9) |
| Sm-S8 | 2.8684(15) | C14-S8 | 1.737(6) |
| Averages | | | 2.8917(15) |  | 1.735(6) |  | 1.367(9) |

**Table S18.** Bond lengths and angles in **Nd-α**

| mnt2− Ligand | Fold Angle (degrees) | Bond | Bond Length (Å) | Bond | Bond Length (Å) | Bond | Bond Length (Å) |
| --- | --- | --- | --- | --- | --- | --- | --- |
| 1 | 1.34 | Nd-S1 | 2.9110(12) | C1-S1 | 1.736(4) | C1-C2 | 1.375(6) |
| Nd-S2 | 2.9193(12) | C2-S2 | 1.723(4) |
| 2 | 14.2 | Nd-S3 | 2.8840(12) | C5-S3 | 1.732(5) | C5-C6 | 1.370(6) |
| Nd-S4 | 2.9521(12) | C6-S4 | 1.740(5) |
| 3 | 22.71 | Nd-S5 | 2.9425(15) | C9-S5 | 1.737(5) | C9-C10 | 1.372(6) |
| Nd-S6 | 2.9196(12) | C10-S6 | 1.730(5) |
| 4 | 40.27 | Nd-S7 | 2.8971(12) | C13-S7 | 1.734(4) | C13-C14 | 1.372(6) |
| Nd-S8 | 2.9100(12) | C14-S8 | 1.736(4) |
| Averages | | | 2.9169(12) |  | 1.733(4) |  | 1.372(6) |

**Table S23.** Bond lengths and angles in **Np-β**

| mnt2− Ligand | Fold Angle (degrees) | Bond | Bond Length (Å) | Bond | Bond Length (Å) | Bond | Bond Length (Å) |
| --- | --- | --- | --- | --- | --- | --- | --- |
| 1 | 1.50 | Np-S1 | 2.922(2) | C1-S1 | 1.742(9) | C1-C2 | 1.366(15) |
| Np-S2 | 2.887(2) | C2-S2 | 1.736(12) |
| 2 | 5.95 | Np-S3 | 2.861(2) | C5-S3 | 1.726(9) | C5-C6 | 1.373(12) |
| Np-S4 | 2.866(2) | C6-S4 | 1.733(9) |
| 3 | 27.36 | Np-S5 | 2.894(2) | C9-S5 | 1.738(9) | C9-C10 | 1.364(15) |
| Np-S6 | 2.895(3) | C10-S6 | 1.739(12) |
| 4 | 32.37 | Np-S7 | 2.915(3) | C13-S7 | 1.731(12) | C13-C14 | 1.364(12) |
| Np-S8 | 2.924(2) | C14-S8 | 1.741(9) |
| Averages | | | 2.895(2) |  | 1.736(10) |  | 1.367(13) |

**Table S22.** Bond lengths and angles in **Dy-β**

| mnt2− Ligand | Fold Angle (degrees) | Bond | Bond Length (Å) | Bond | Bond Length (Å) | Bond | Bond Length (Å) |
| --- | --- | --- | --- | --- | --- | --- | --- |
| 1 | 4.39 | Dy-S1 | 2.871(2) | C1-S1 | 1.738(9) | C1-C2 | 1.367(15) |
| Dy-S2 | 2.814(3) | C2-S2 | 1.726(9) |
| 2 | 5.50 | Dy-S3 | 2.779(2) | C5-S3 | 1.728(9) | C5-C6 | 1.373(12) |
| Dy-S4 | 2.814(2) | C6-S4 | 1.727(9) |
| 3 | 25.64 | Dy-S5 | 2.839(2) | C9-S5 | 1.735(9) | C9-C10 | 1.360(15) |
| Dy-S6 | 2.803(3) | C10-S6 | 1.732(9) |
| 4 | 32.24 | Dy-S7 | 2.871(2) | C13-S7 | 1.732(9) | C13-C14 | 1.366(12) |
| Dy-S8 | 2.845(2) | C14-S8 | 1.741(9) |
| Averages | | | 2.829(2) |  | 1.732(9) |  | 1.366(13) |

**Table S21.** Bond lengths and angles in **Gd-β**

| mnt2− Ligand | Fold Angle (degrees) | Bond | Bond Length (Å) | Bond | Bond Length (Å) | Bond | Bond Length (Å) |
| --- | --- | --- | --- | --- | --- | --- | --- |
| 1 | 4.57 | Gd-S1 | 2.846(3) | C1-S1 | 1.728(15) | C1-C2 | 1.36(2) |
| Gd-S2 | 2.890(3) | C2-S2 | 1.742(15) |
| 2 | 5.47 | Gd-S3 | 2.834(3) | C5-S3 | 1.735(15) | C5-C6 | 1.367(18) |
| Gd-S4 | 2.809(3) | C6-S4 | 1.729(15) |
| 3 | 25.78 | Gd-S5 | 2.833(3) | C9-S5 | 1.731(15) | C9-C10 | 1.36(2) |
| Gd-S6 | 2.858(3) | C10-S6 | 1.739(15) |
| 4 | 32.56 | Gd-S7 | 2.874(3) | C13-S7 | 1.739(15) | C13-C14 | 1.366(18) |
| Gd-S8 | 2.888(3) | C14-S8 | 1.738(15) |
| Averages | | | 2.854(3) |  | 1.735(15) |  | 1.363(19) |

**Table S26.** Bond lengths and angles in **Cm-α**

| mnt2− Ligand | Fold Angle (degrees) | Bond | Bond Length (Å) | Bond | Bond Length (Å) | Bond | Bond Length (Å) |
| --- | --- | --- | --- | --- | --- | --- | --- |
| 1 | 0.32 | Cm-S1 | 2.8759(18) | C1-S1 | 1.722(6) | C1-C2 | 1.374(12) |
| Cm-S2 | 2.8655(18) | C2-S2 | 1.734(6) |
| 2 | 14.78 | Cm-S3 | 2.9123(18) | C5-S3 | 1.739(9) | C5-C6 | 1.362(12) |
| Cm-S4 | 2.8553(18) | C6-S4 | 1.729(9) |
| 3 | 23.43 | Cm-S5 | 2.8943(18) | C9-S5 | 1.730(9) | C9-C10 | 1.372(9) |
| Cm-S6 | 2.9060(18) | C10-S6 | 1.742(6) |
| 4 | 41.17 | Cm-S7 | 2.8924(18) | C13-S7 | 1.736(9) | C13-C14 | 1.369(12) |
| Cm-S8 | 2.8726(18) | C14-S8 | 1.737(9) |
| Averages | | | 2.8843(18) |  | 1.733(8) |  | 1.369(11) |

**Table S25.** Bond lengths and angles in **Am-α**

| mnt2− Ligand | Fold Angle (degrees) | Bond | Bond Length (Å) | Bond | Bond Length (Å) | Bond | Bond Length (Å) |
| --- | --- | --- | --- | --- | --- | --- | --- |
| 1 | 1.67 | Am-S1 | 2.8853(6) | C1-S1 | 1.735(3) | C1-C2 | 1.375(4) |
| Am-S2 | 2.8956(9) | C2-S2 | 1.721(3) |
| 2 | 13.67 | Am-S3 | 2.8633(6) | C5-S3 | 1.729(3) | C5-C6 | 1.368(4) |
| Am-S4 | 2.9273(9) | C6-S4 | 1.741(3) |
| 3 | 23.08 | Am-S5 | 2.9182(9) | C9-S5 | 1.739(3) | C9-C10 | 1.371(4) |
| Am-S6 | 2.8976(9) | C10-S6 | 1.731(3) |
| 4 | 41.07 | Am-S7 | 2.8745(9) | C13-S7 | 1.737(3) | C13-C14 | 1.371(4) |
| Am-S8 | 2.8937(9) | C14-S8 | 1.734(3) |
| Averages | | | 2.8944(9) |  | 1.733(3) |  | 1.371(4) |

**Table S24.** Bond lengths and angles in **Pu-β**

| mnt2− Ligand | Fold Angle (degrees) | Bond | Bond Length (Å) | Bond | Bond Length (Å) | Bond | Bond Length (Å) |
| --- | --- | --- | --- | --- | --- | --- | --- |
| 1 | 2.24 | Pu-S1 | 2.908(4) | C1-S1 | 1.745(18) | C1-C2 | 1.37(3) |
| Pu-S2 | 2.871(4) | C2-S2 | 1.72(2) |
| 2 | 5.66 | Pu-S3 | 2.849(4) | C5-S3 | 1.729(15) | C5-C6 | 1.36(2) |
| Pu-S4 | 2.855(4) | C6-S4 | 1.739(15) |
| 3 | 27.96 | Pu-S5 | 2.892(4) | C9-S5 | 1.732(18) | C9-C10 | 1.36(3) |
| Pu-S6 | 2.883(4) | C10-S6 | 1.73(2) |
| 4 | 31.58 | Pu-S7 | 2.902(4) | C13-S7 | 1.723(18) | C13-C14 | 1.36(2) |
| Pu-S8 | 2.917(4) | C14-S8 | 1.747(18) |
| Averages | | | 2.885(4) |  | 1.733(18) |  | 1.36(2) |

**Table S28.** Bond lengths and angles in **Cf-β**

| mnt2− Ligand | Fold Angle (degrees) | Bond | Bond Length (Å) | Bond | Bond Length (Å) | Bond | Bond Length (Å) |
| --- | --- | --- | --- | --- | --- | --- | --- |
| 1 | 5.43 | Cf-S1 | 2.8828(15) | C1-S1 | 1.741(6) | C1-C2 | 1.372(9) |
| Cf-S2 | 2.8332(15) | C2-S2 | 1.726(6) |
| 2 | 6.89 | Cf-S3 | 2.8021(15) | C5-S3 | 1.730(6) | C5-C6 | 1.371(9) |
| Cf-S4 | 2.8394(15) | C6-S4 | 1.735(6) |
| 3 | 26.80 | Cf-S5 | 2.8577(15) | C9-S5 | 1.733(6) | C9-C10 | 1.371(9) |
| Cf-S6 | 2.8089(18) | C10-S6 | 1.726(6) |
| 4 | 32.59 | Cf-S7 | 2.8793(15) | C13-S7 | 1.728(6) | C13-C14 | 1.375(9) |
| Cf-S8 | 2.8698(15) | C14-S8 | 1.744(6) |
| Averages | | | 2.8466(15) |  | 1.733(6) |  | 1.372(9) |

**Table S27.** Bond lengths and angles in **Cm-β**

| mnt2− Ligand | Fold Angle (degrees) | Bond | Bond Length (Å) | Bond | Bond Length (Å) | Bond | Bond Length (Å) |
| --- | --- | --- | --- | --- | --- | --- | --- |
| 1 | 4.65 | Cm-S1 | 2.902(2) | C1-S1 | 1.743(12) | C1-C2 | 1.369(15) |
| Cm-S2 | 2.864(3) | C2-S2 | 1.726(12) |
| 2 | 4.99 | Cm-S3 | 2.833(3) | C5-S3 | 1.731(12) | C5-C6 | 1.370(15) |
| Cm-S4 | 2.856(3) | C6-S4 | 1.730(12) |
| 3 | 25.83 | Cm-S5 | 2.870(3) | C9-S5 | 1.733(12) | C9-C10 | 1.360(15) |
| Cm-S6 | 2.847(3) | C10-S6 | 1.731(12) |
| 4 | 33.21 | Cm-S7 | 2.901(3) | C13-S7 | 1.735(12) | C13-C14 | 1.368(15) |
| Cm-S8 | 2.896(3) | C14-S8 | 1.744(12) |
| Averages | | | 2.871(3) |  | 1.734(12) |  | 1.367(15) |


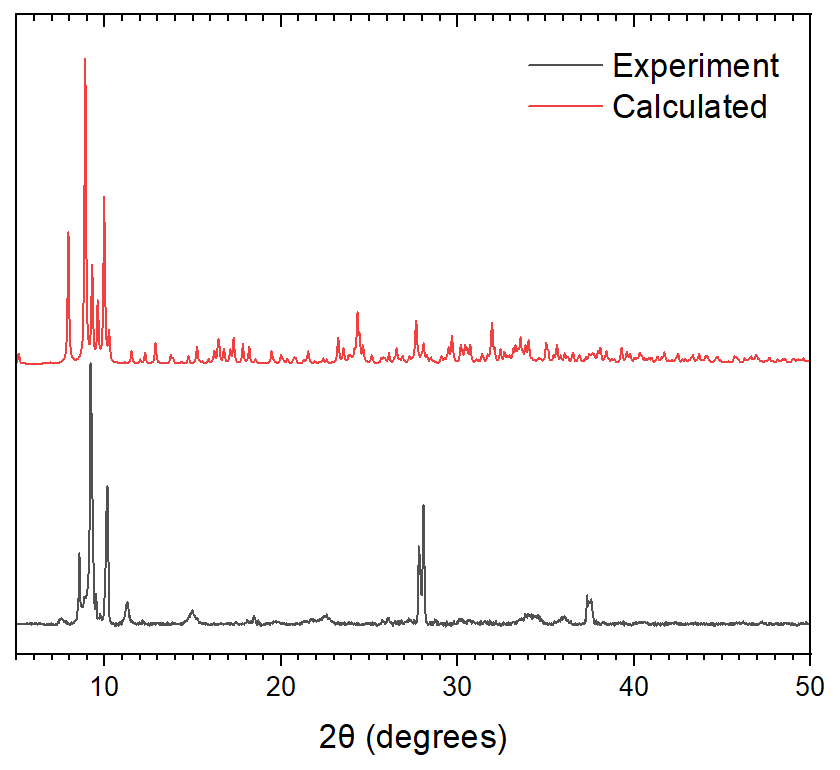


**Figure S8**. Powder X-ray diffraction pattern of **La-α** and the calculated pattern.


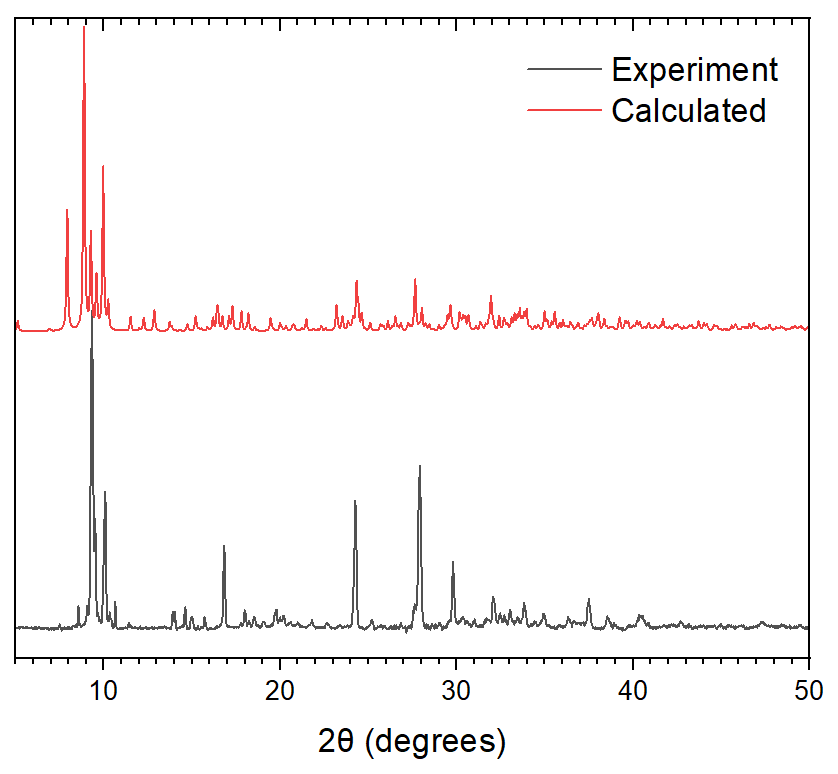


**Figure S9**. Powder X-ray diffraction pattern of **Ce-α** and the calculated pattern.


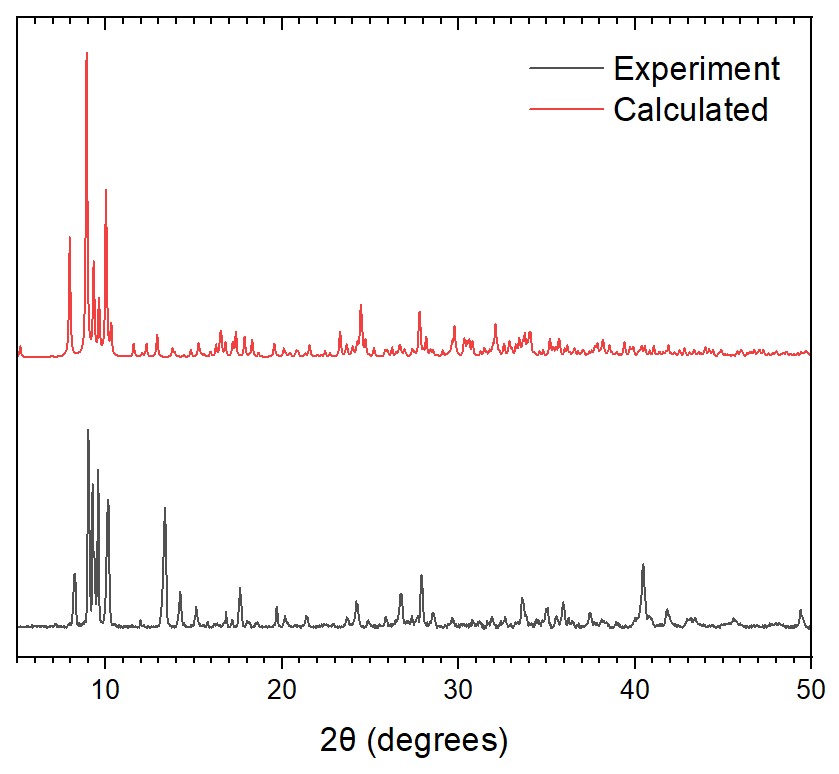


**Figure S10**. Powder X-ray diffraction pattern of **Pr-α** and the calculated pattern.


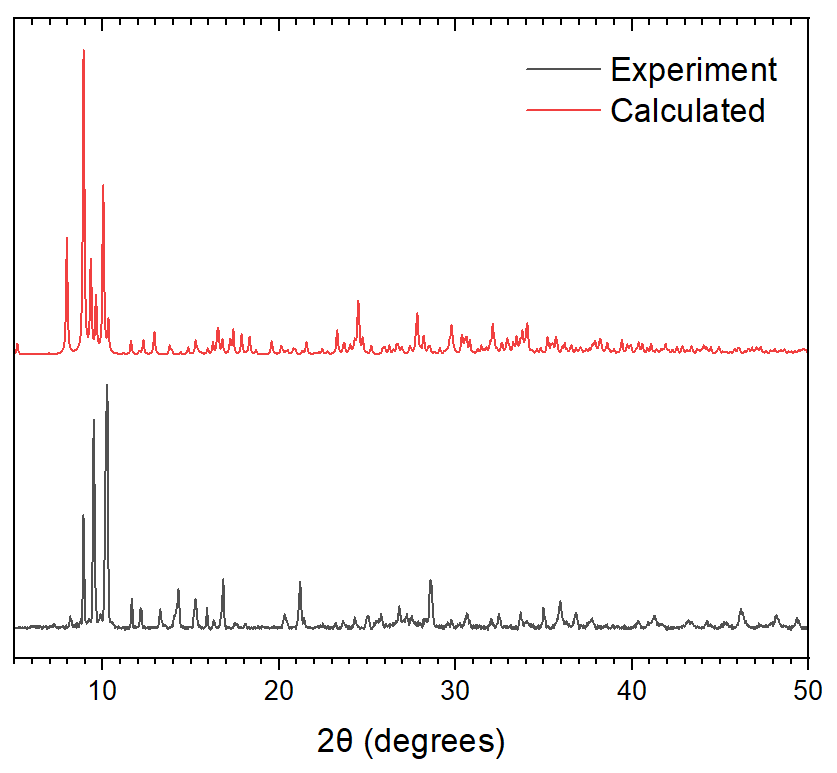


**Figure S11**. Powder X-ray diffraction pattern of **Nd-α** and the calculated pattern.


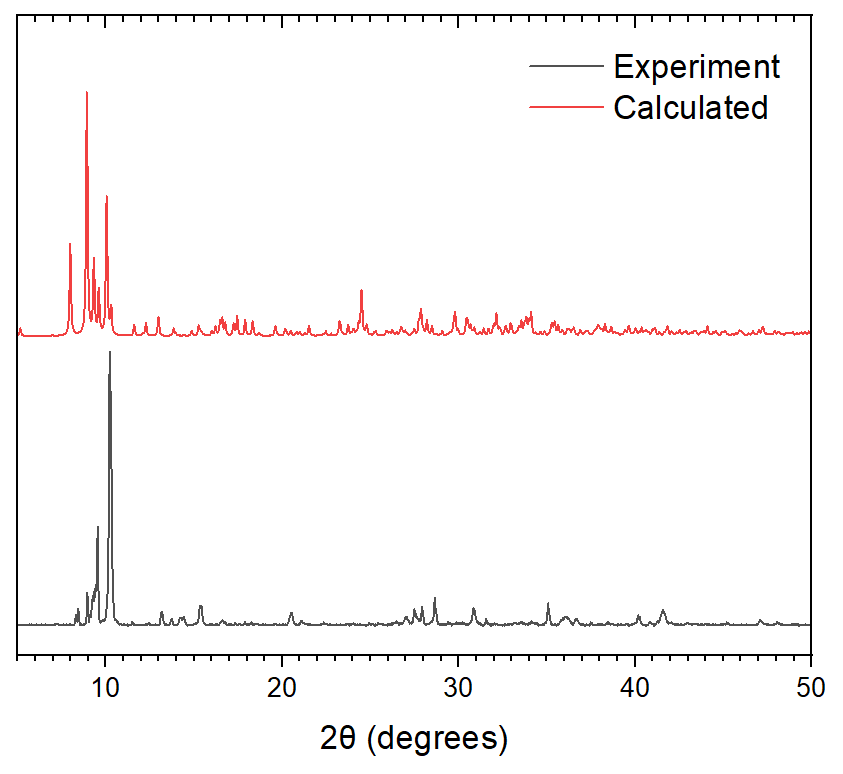


**Figure S12**. Powder X-ray diffraction pattern of **Sm-α** and the calculated pattern.


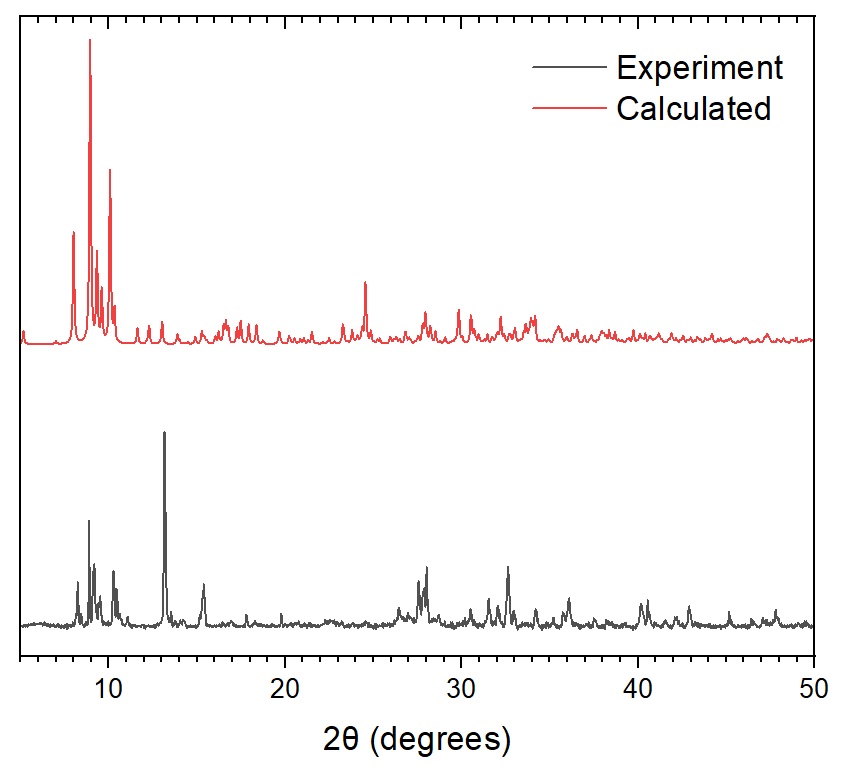


**Figure S13**. Powder X-ray diffraction pattern of **Eu-α** and the calculated pattern.


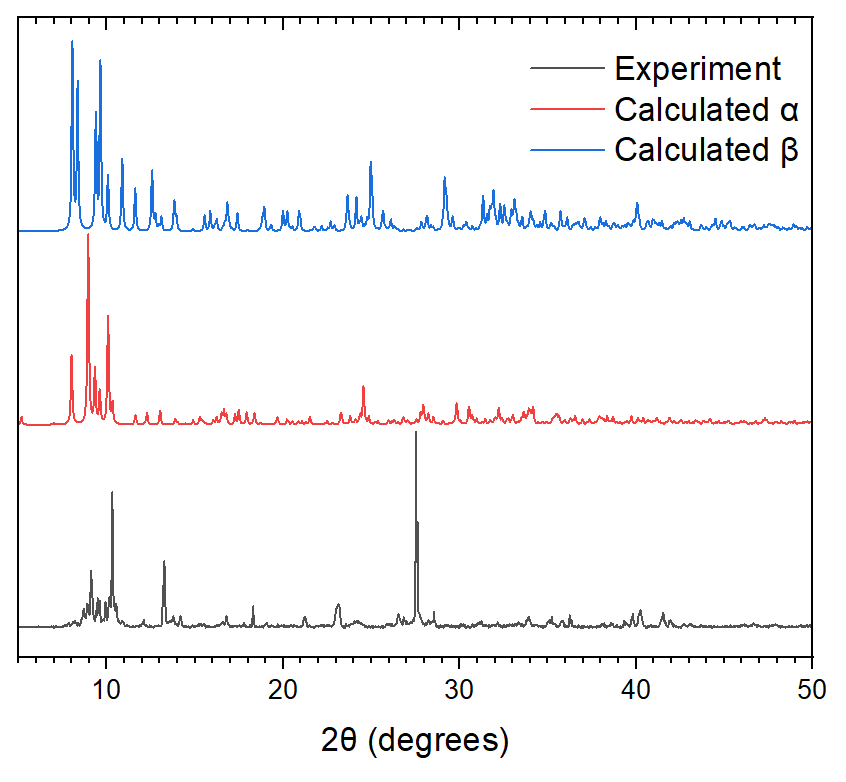


**Figure S14**. Powder X-ray diffraction pattern of **Gd-α/β** and the calculated pattern.


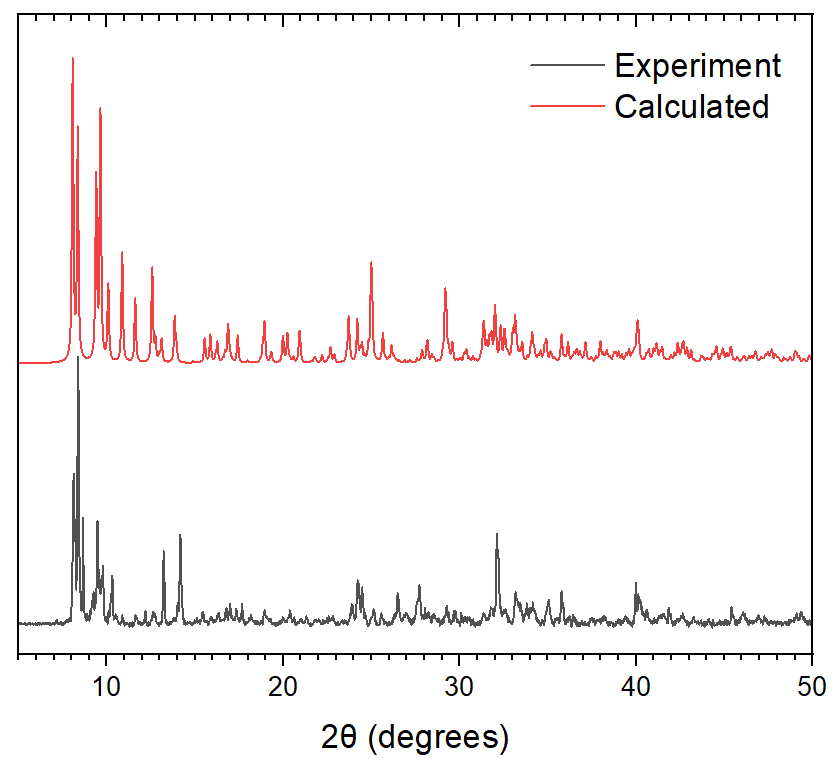


**Figure S15**. Powder X-ray diffraction pattern of **Dy-β** and the calculated pattern.

**Solid-State Absorption Spectra**

The transition assignments for the lanthanide complexes were based on work by Binnemans *et al*.1 Assignments of transitions for the actinide complexes were based on several studies by Carnall and others.2–6 Because the ground and excited states in the actinides tend to be significantly mixed, term symbols do not have much physical meaning. As such, the assignments used are the letter groups used in the referenced papers.


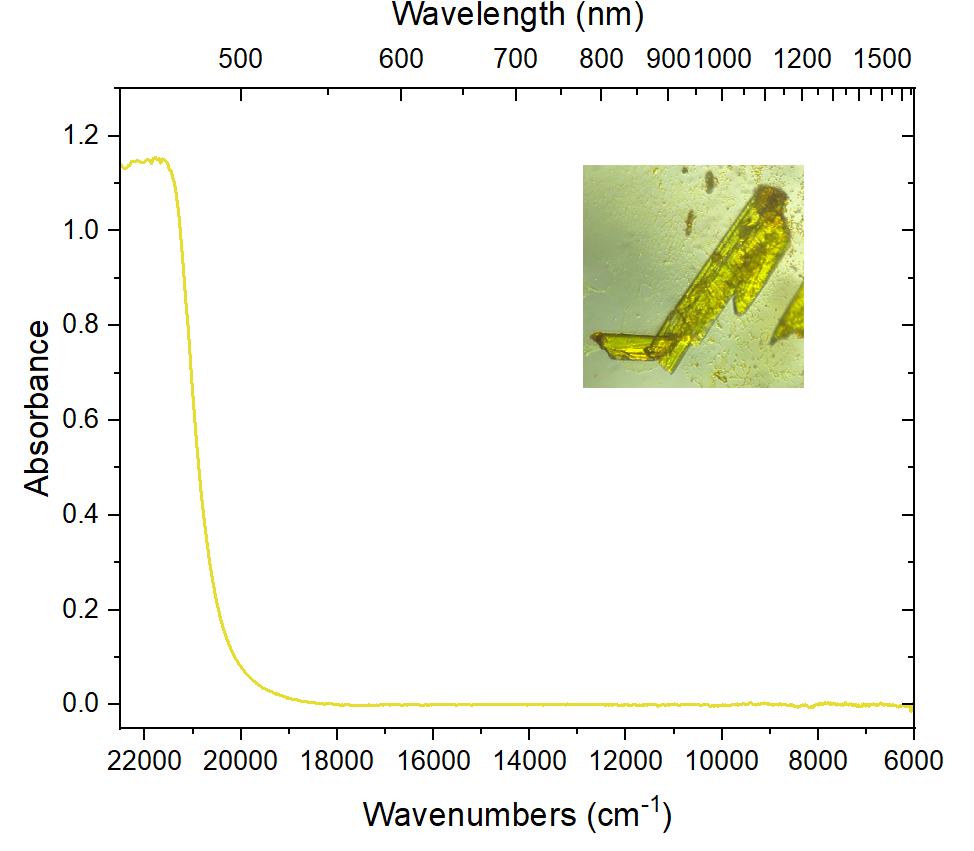


**Figure S16**. Solid-state absorption spectrum of **La–α** with an image of the crystals.


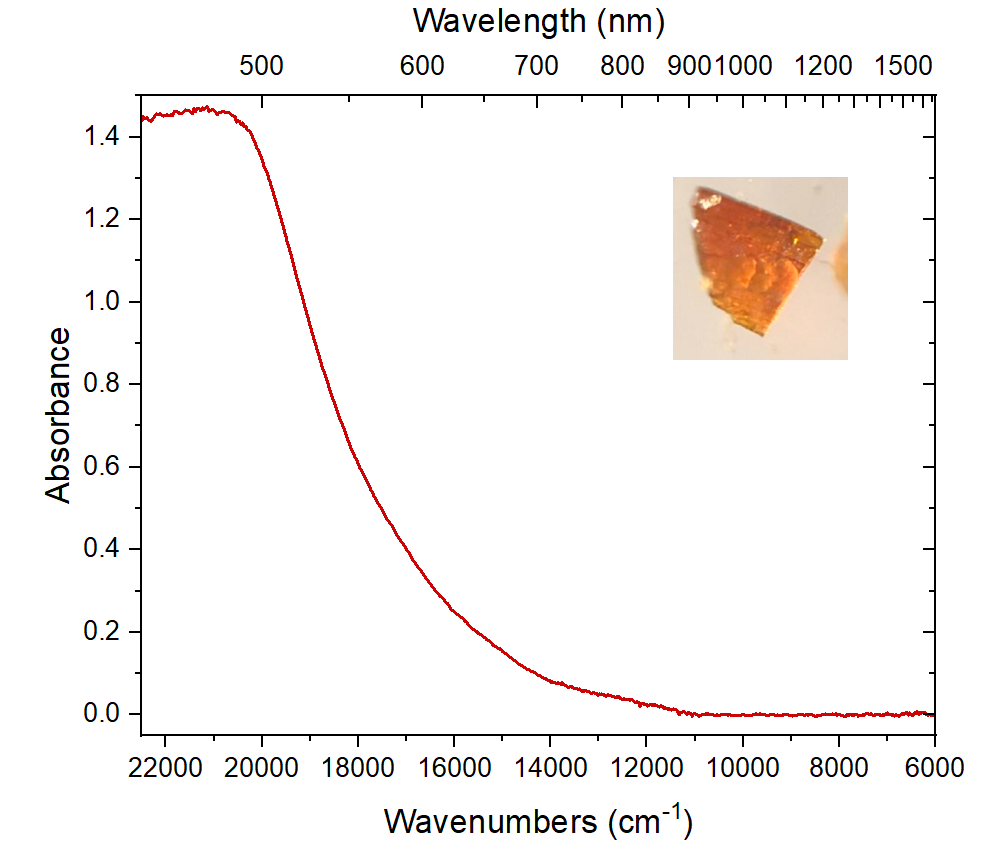


**Figure S17**. Solid-state absorption spectrum of **Ce–α** with an image of the crystals.


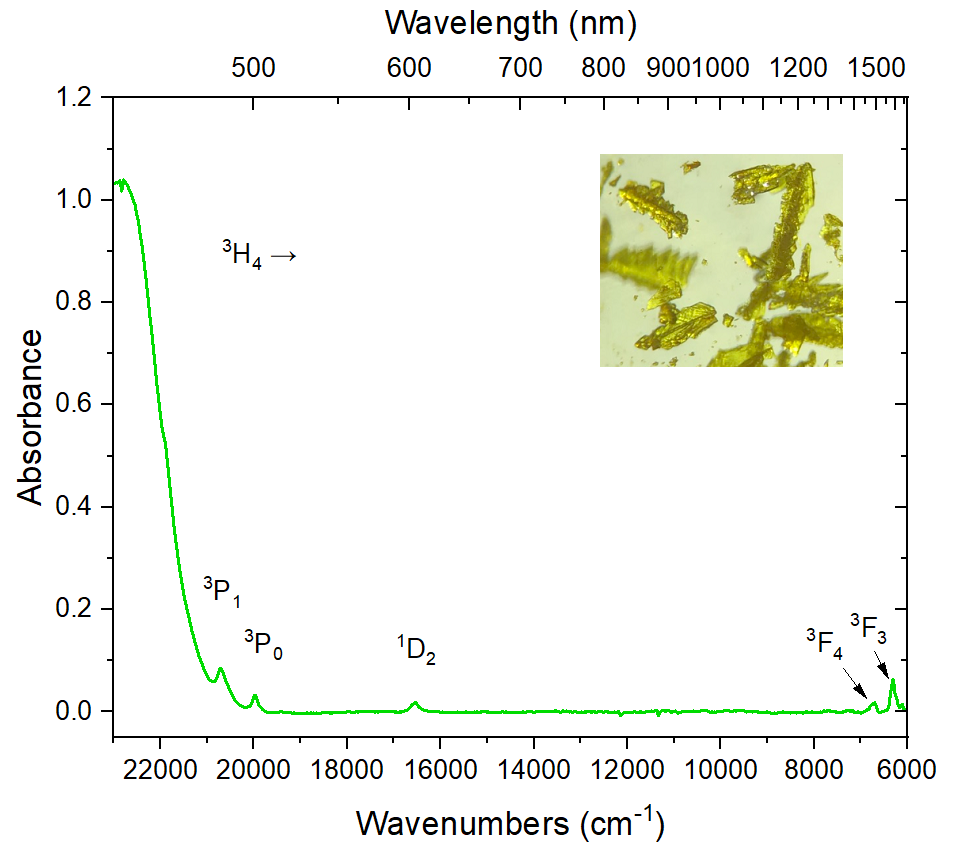


**Figure S18**. Solid-state absorption spectrum of **Pr–α** with transition assignments and an image of the crystals.


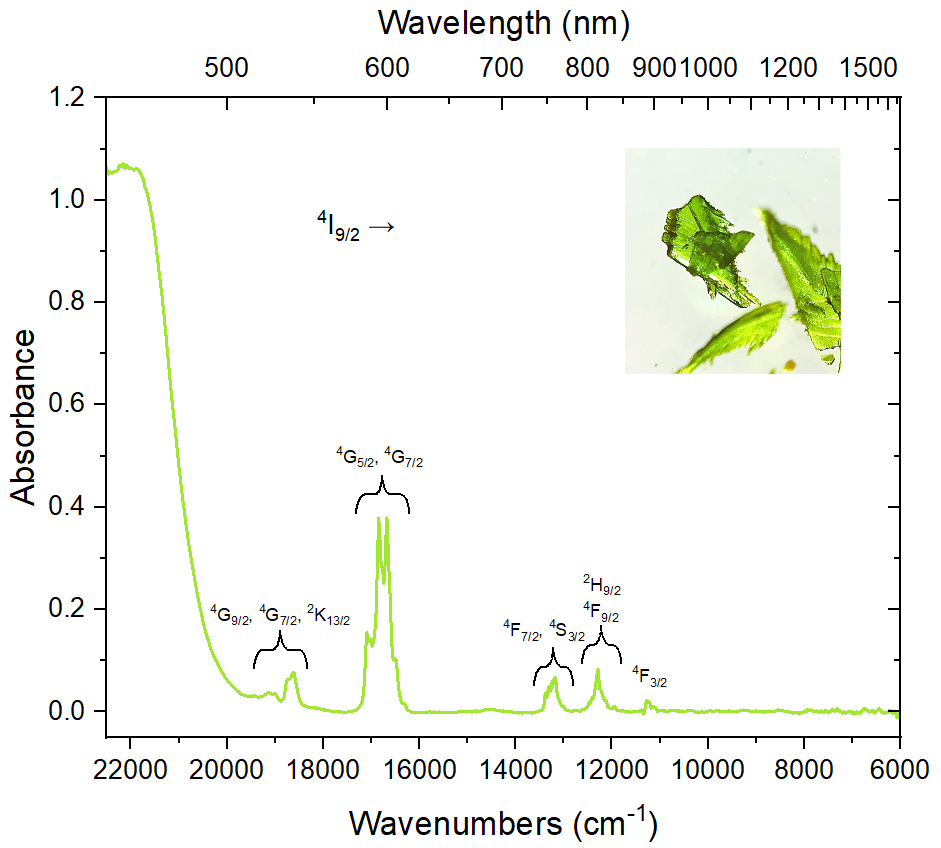


**Figure S19**. Solid-state absorption spectrum of **Nd–α** with an image of the crystals.


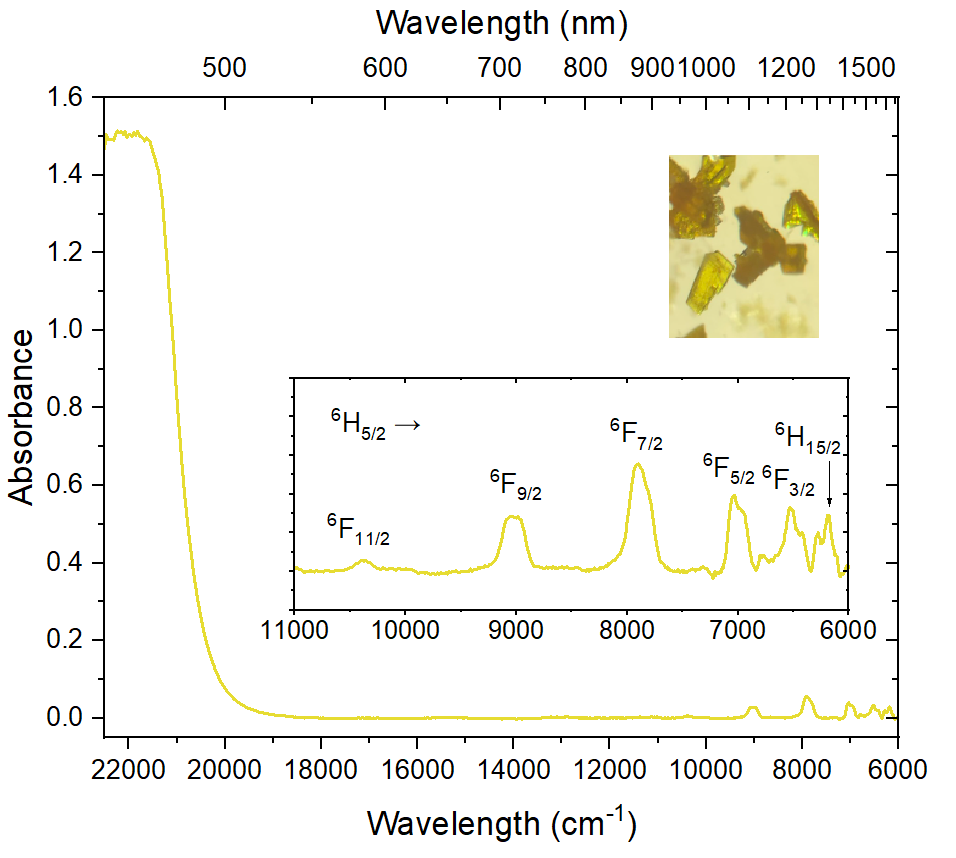


**Figure S20**. Solid-state absorption spectrum of **Sm–α** with transition assignments and an image of the crystals.


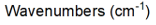

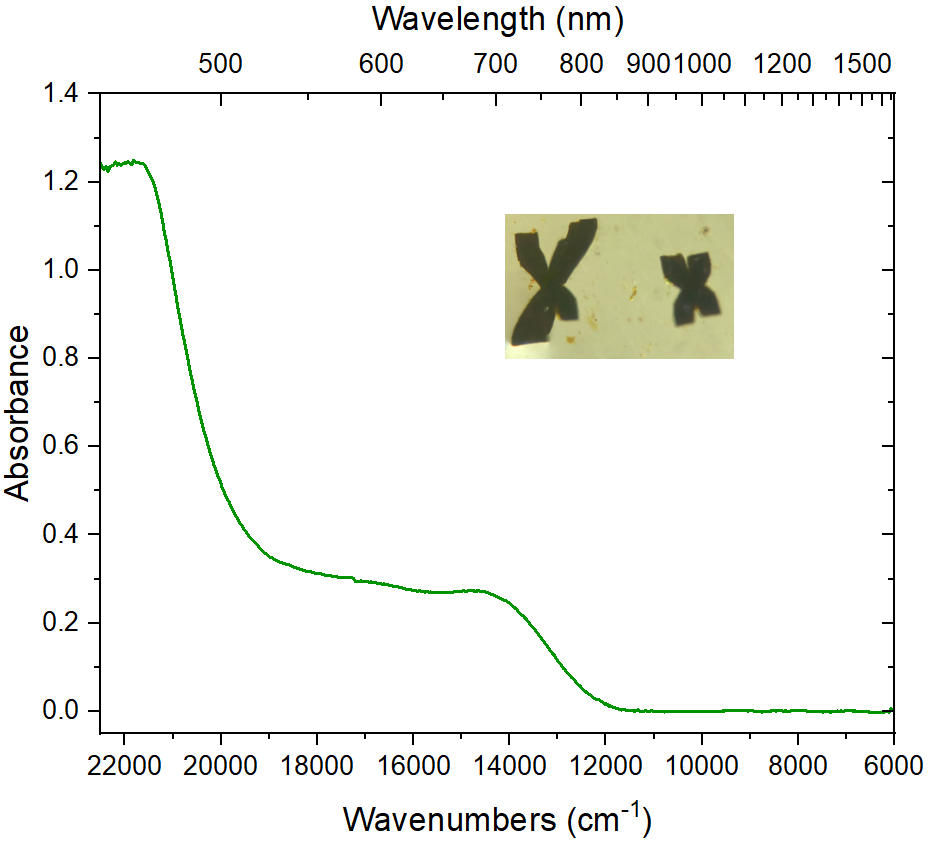


**Figure S21**. Solid-state absorption spectrum of **Eu–α** with an image of the crystals.


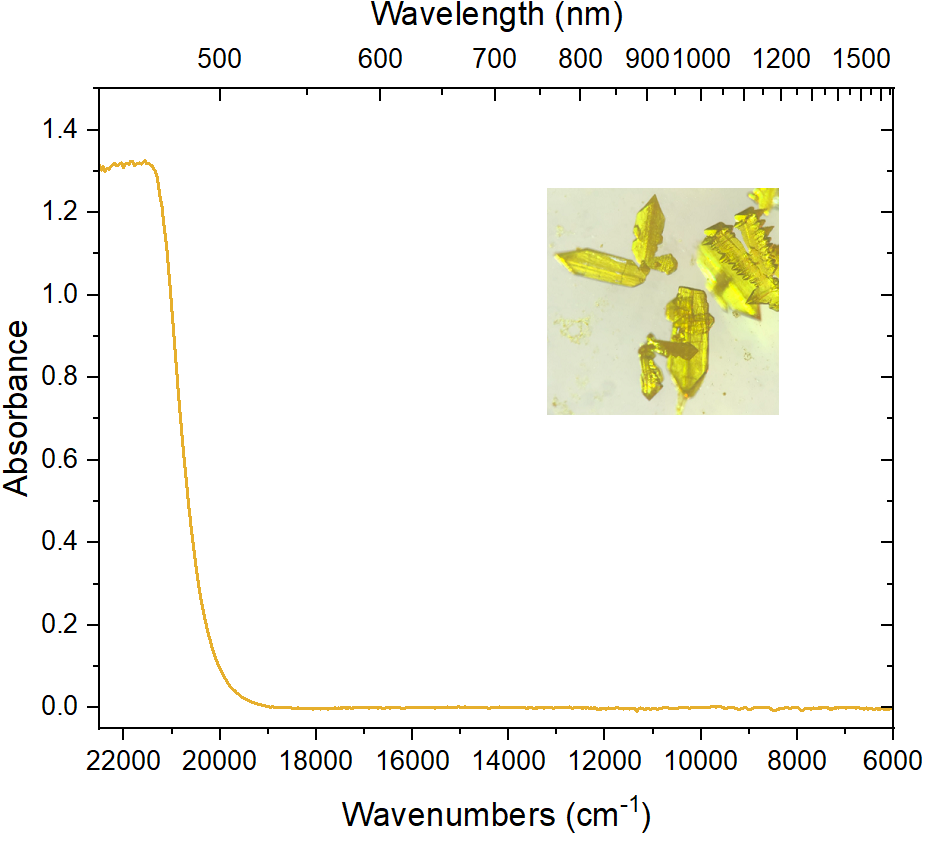


**Figure S22**. Solid-state absorption spectrum of **Gd–β** with an image of the crystals.


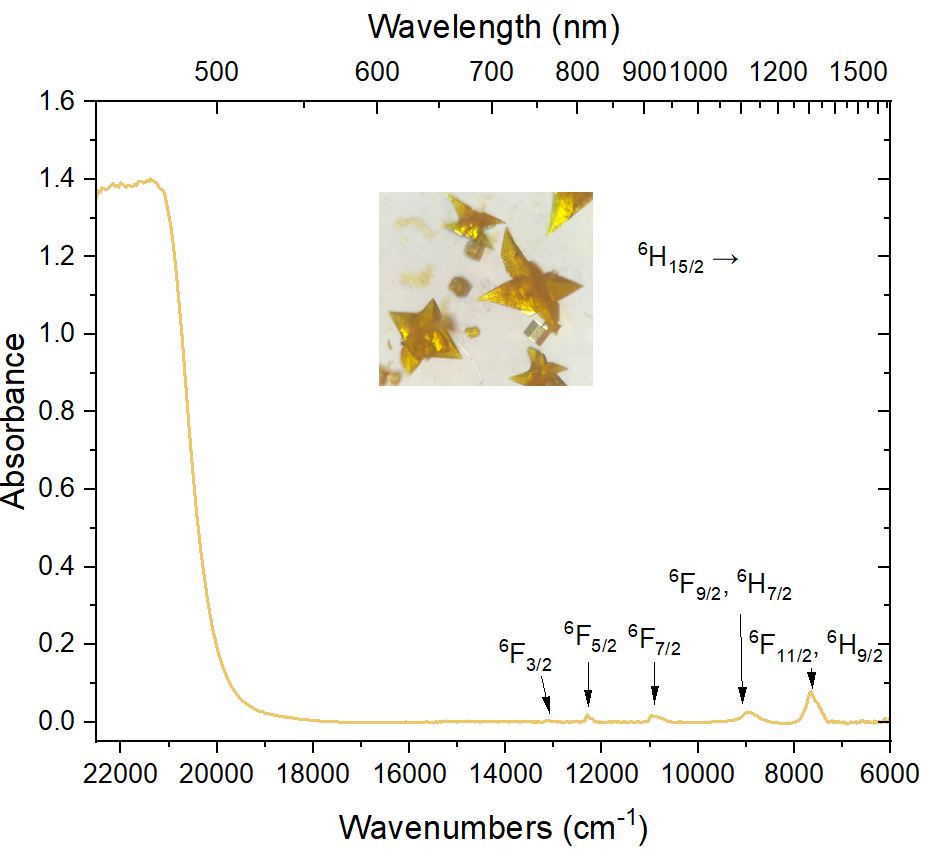


**Figure S23**. Solid-state absorption spectrum of **Dy–β** with transition assignments and an image of the crystals.


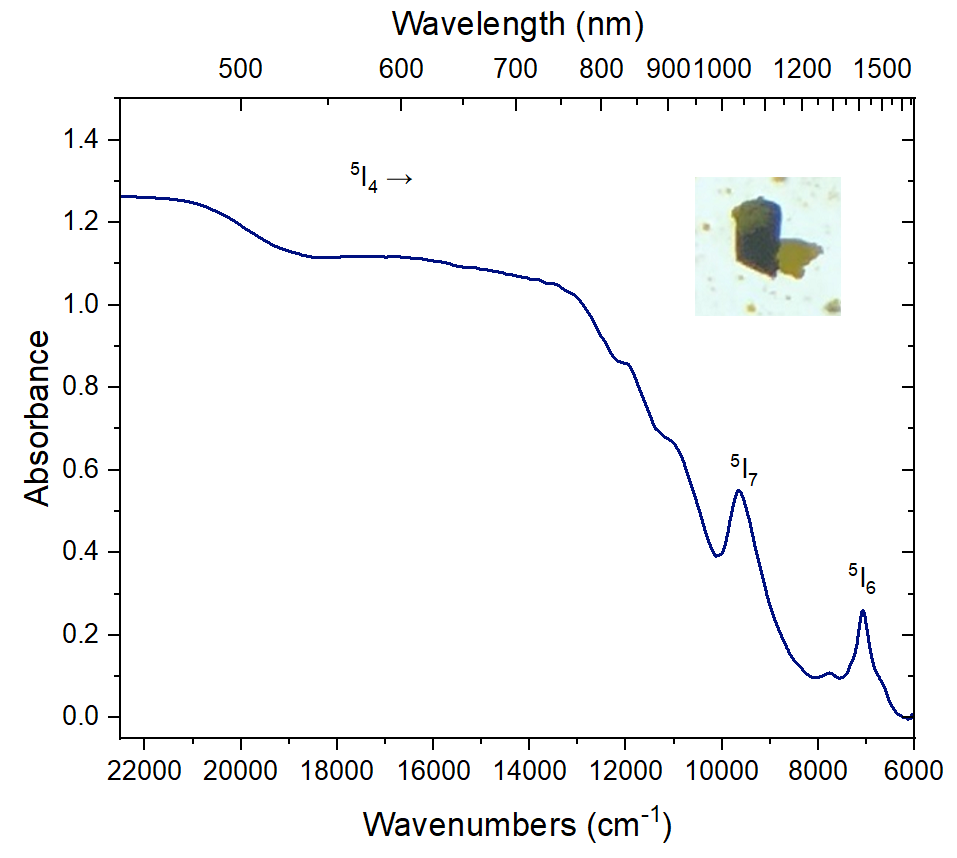


**Figure S24**. Solid-state absorption spectrum of **Np–β** with transition assignments and an image of the crystals.


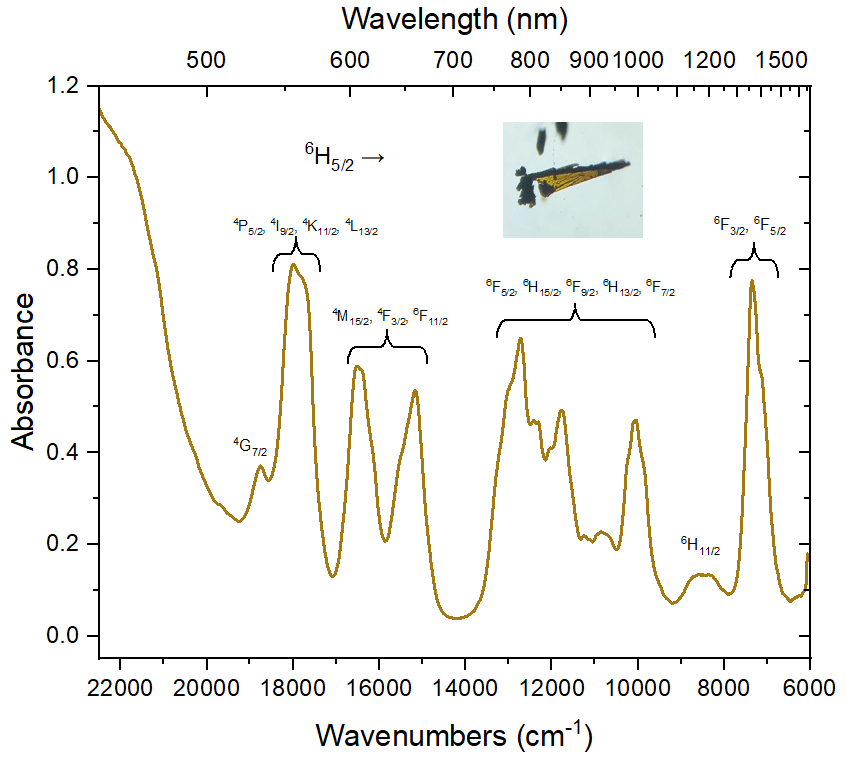


**Figure S25**. Solid-state absorption spectrum of **Pu–β** with transition assignments and an image of the crystals.

B

C

D, E, F, G

H, I, K

L, M

N


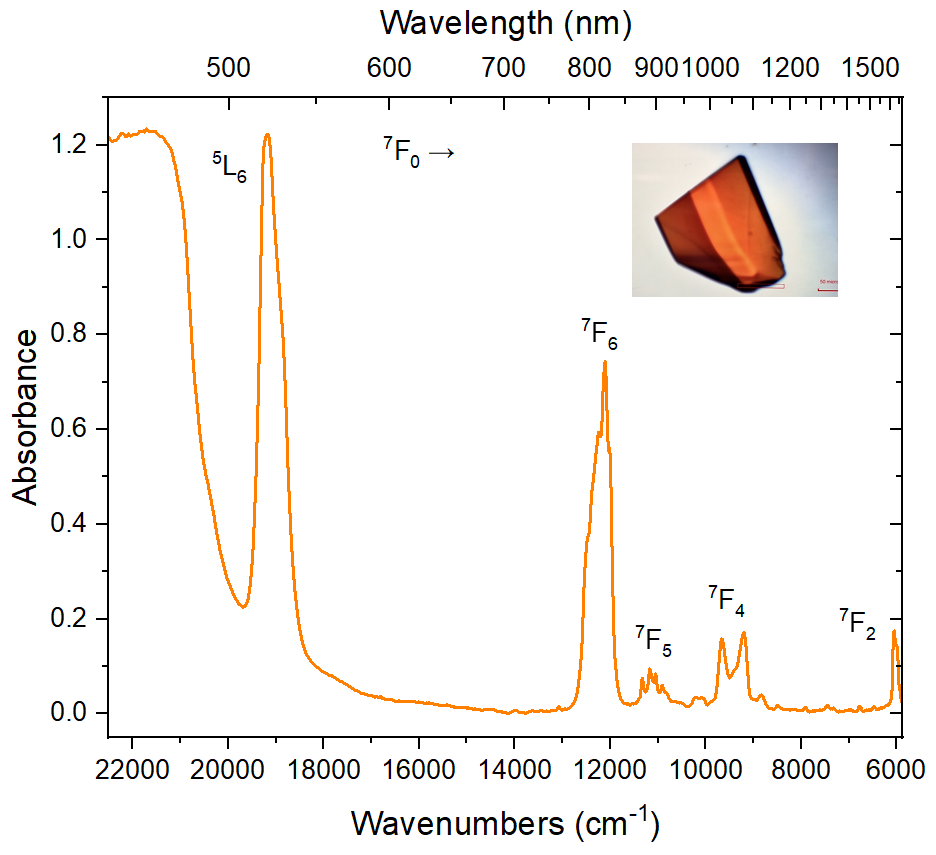


**Figure S26**. Solid-state absorption spectrum of **Am–α** with transition assignments and an image of the crystals.

H

E

D

C

A


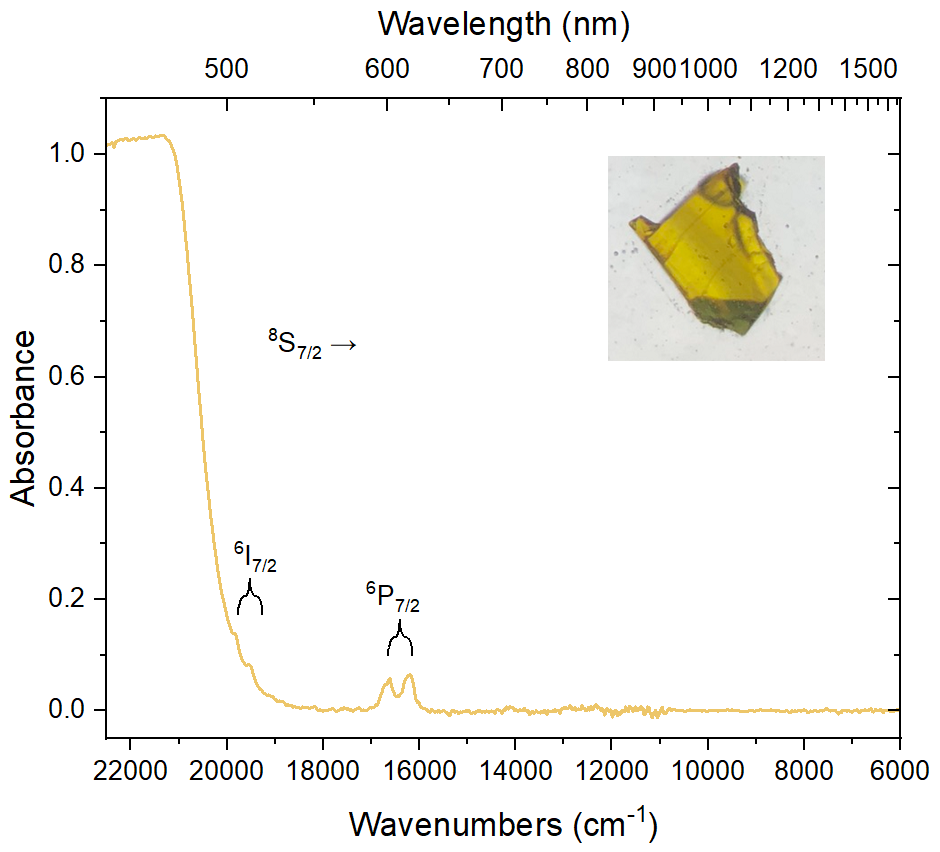


**Figure S27**. Solid-state absorption spectrum of **Cm–α** and **Cm–β** with transition assignments and an image of the crystals.

A

B


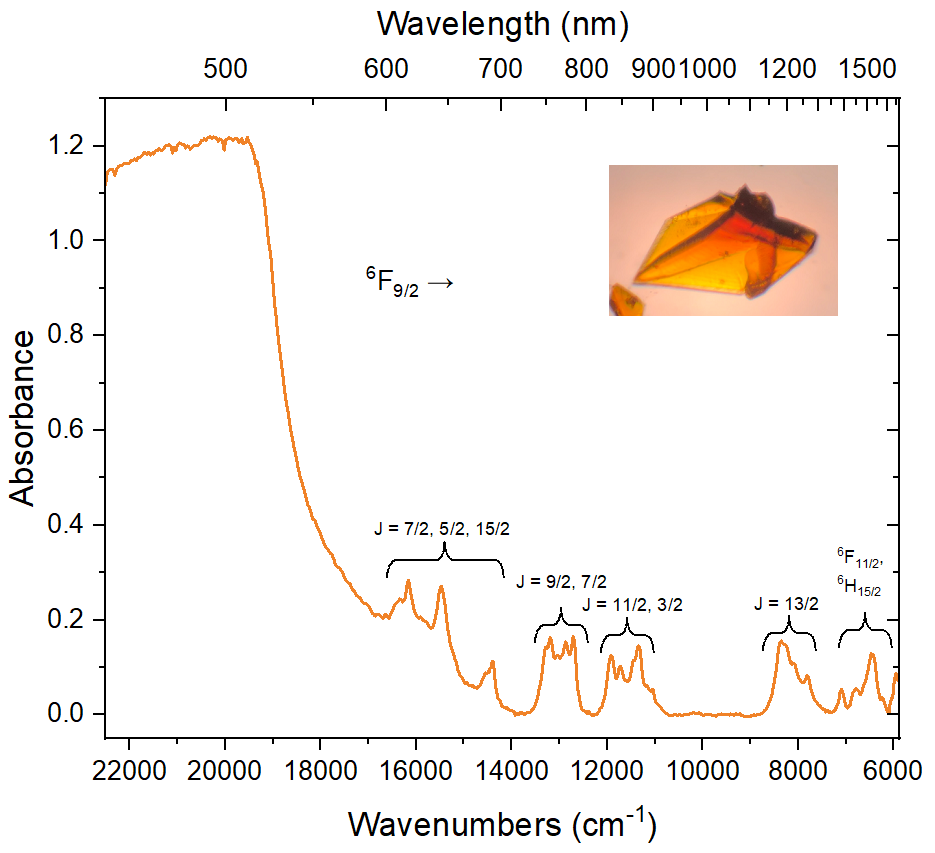


**Figure S28**. Solid-state absorption spectrum of **Cf–β** with transition assignments and an image of the crystals.

A

B

C

D

E


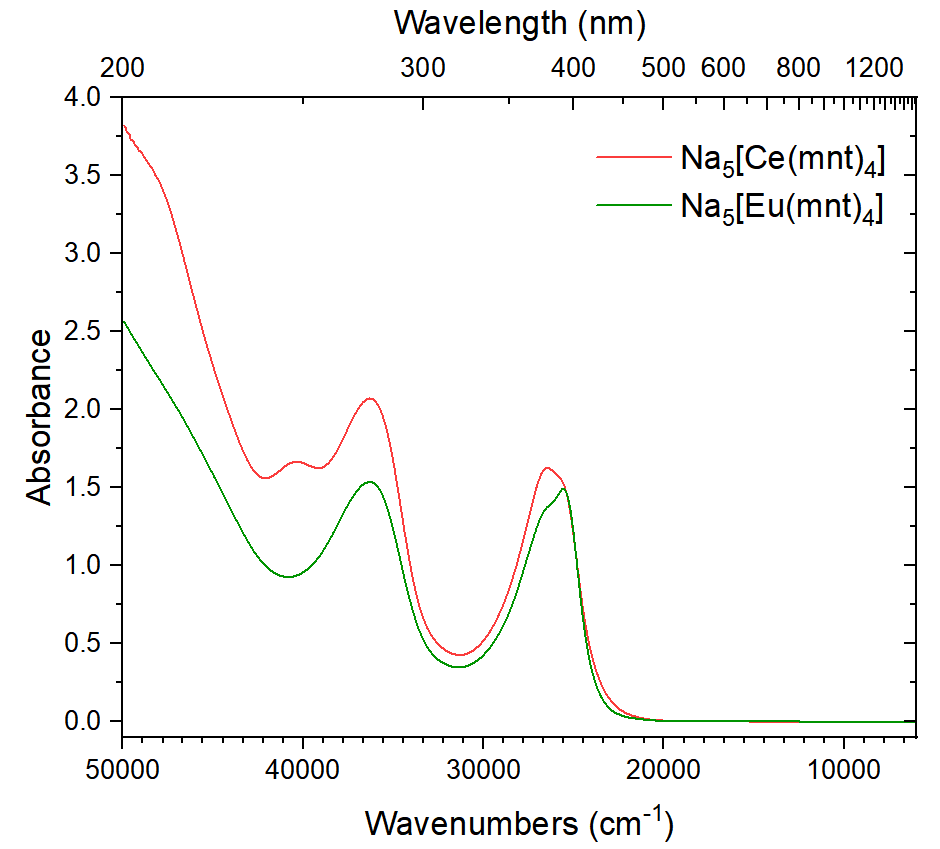


**Figure S29**. Solution state spectra of the Na5[Ce(mnt)4] and Na5[Eu(mnt)4] complex in acetonitrile showing ligand-based absorption transitions.


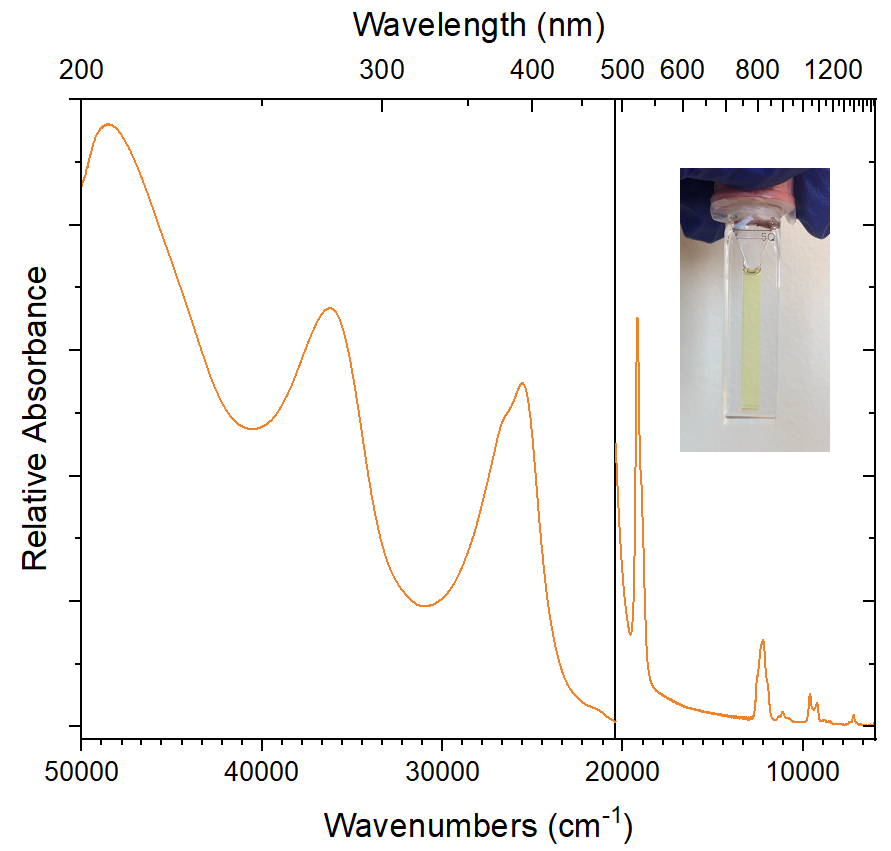


**Figure S30**. Solution state spectrum of the Na5[Am(mnt)4] complex in acetonitrile showing ligand-based absorption transitions and 5*f*→5*f* transitions.


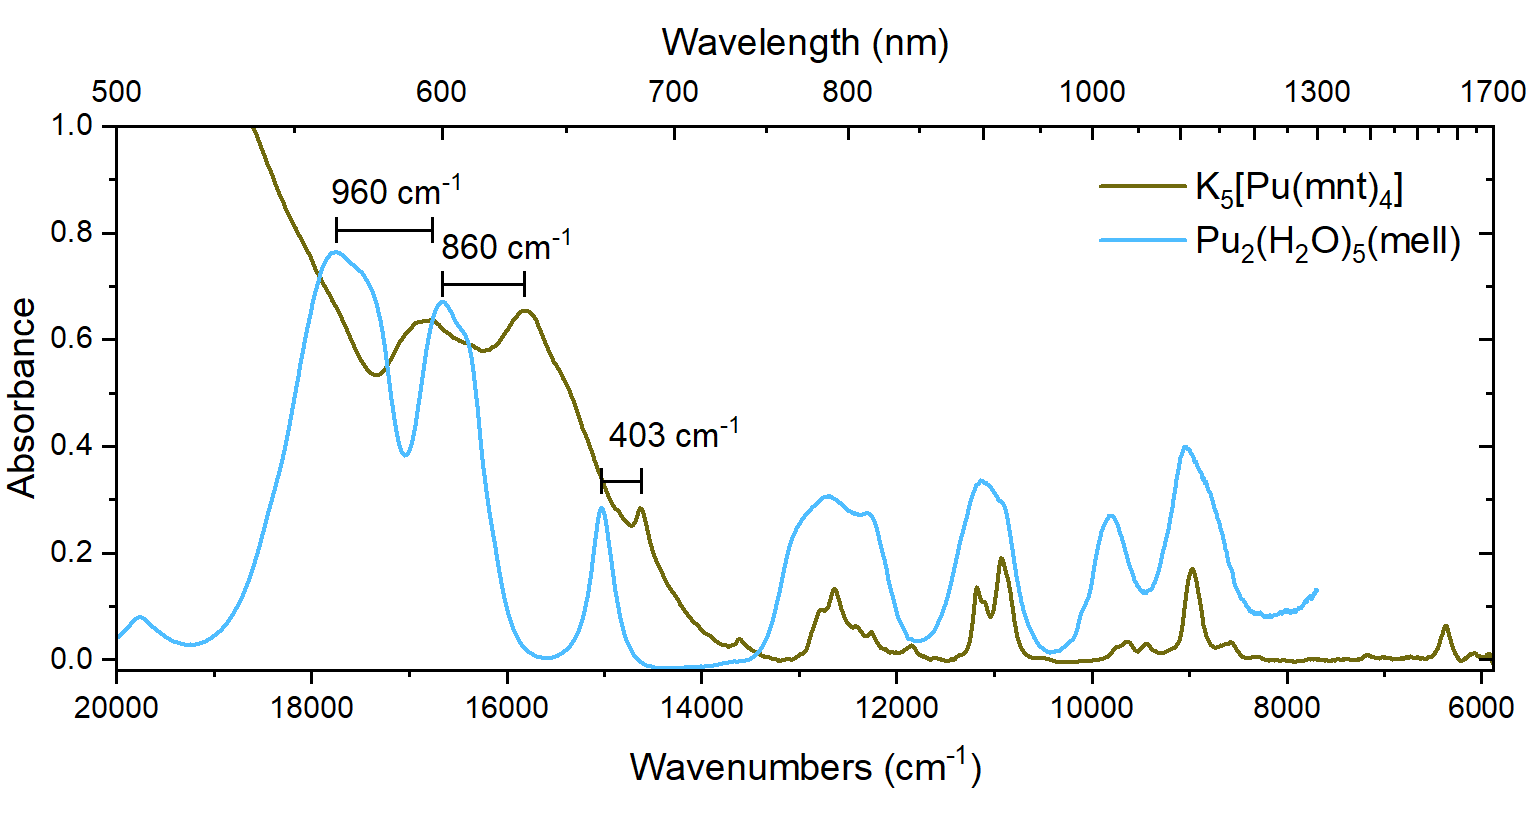


**Figure S31.** Overlayed spectra of **Pu–β** and plutonium mellitate7 highlighting the nephelauxetic effect causing a substantial redshift of the 5*f*→5*f* transitions, particularly for the higher energy transitions.


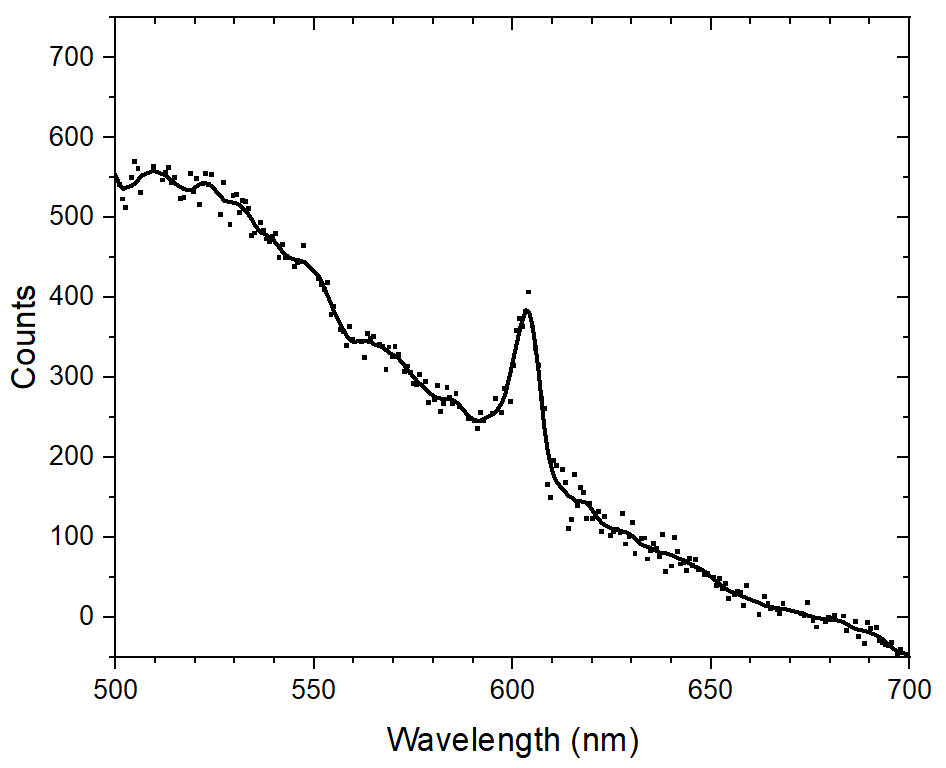


**Figure S32.**Weak photoluminescence spectrum obtained from **Cm–α/β**.


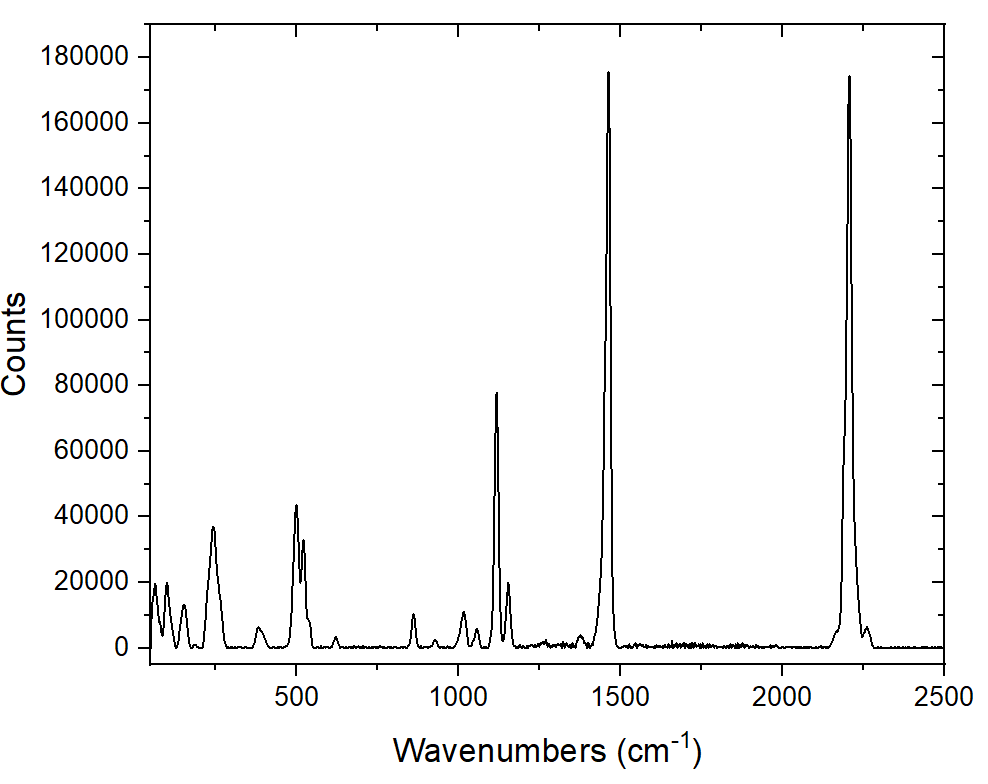


**Figure S35.** Raman spectrum of **La–α**


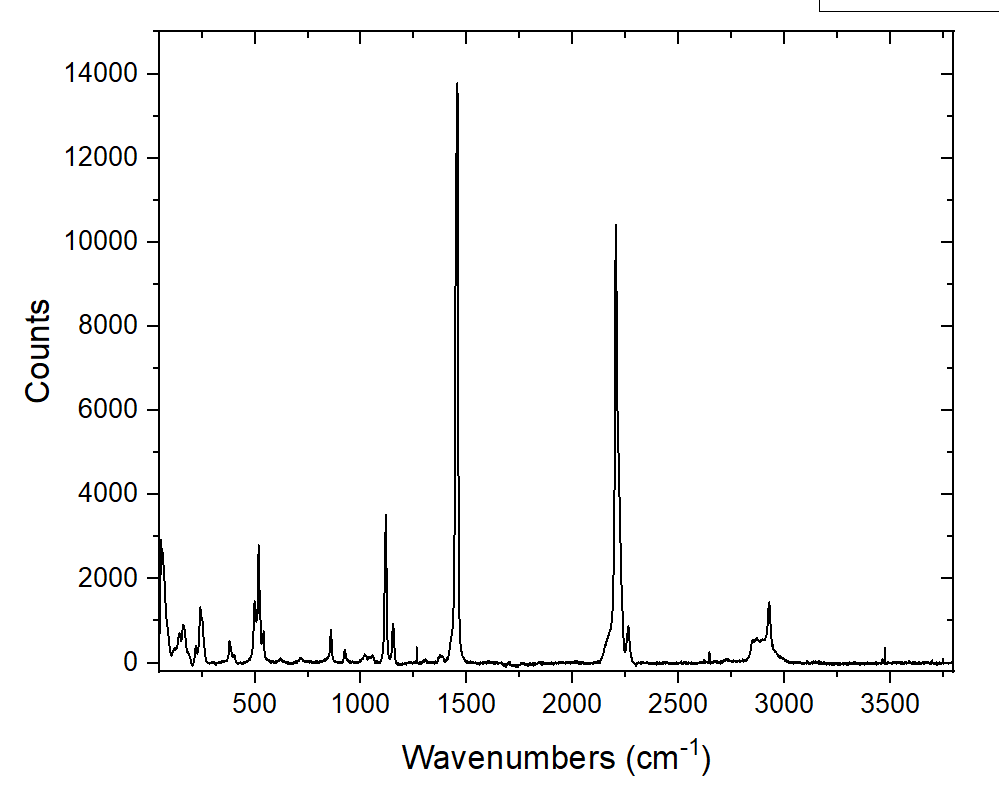


**Figure S36.** Raman spectrum of **Ce–α**


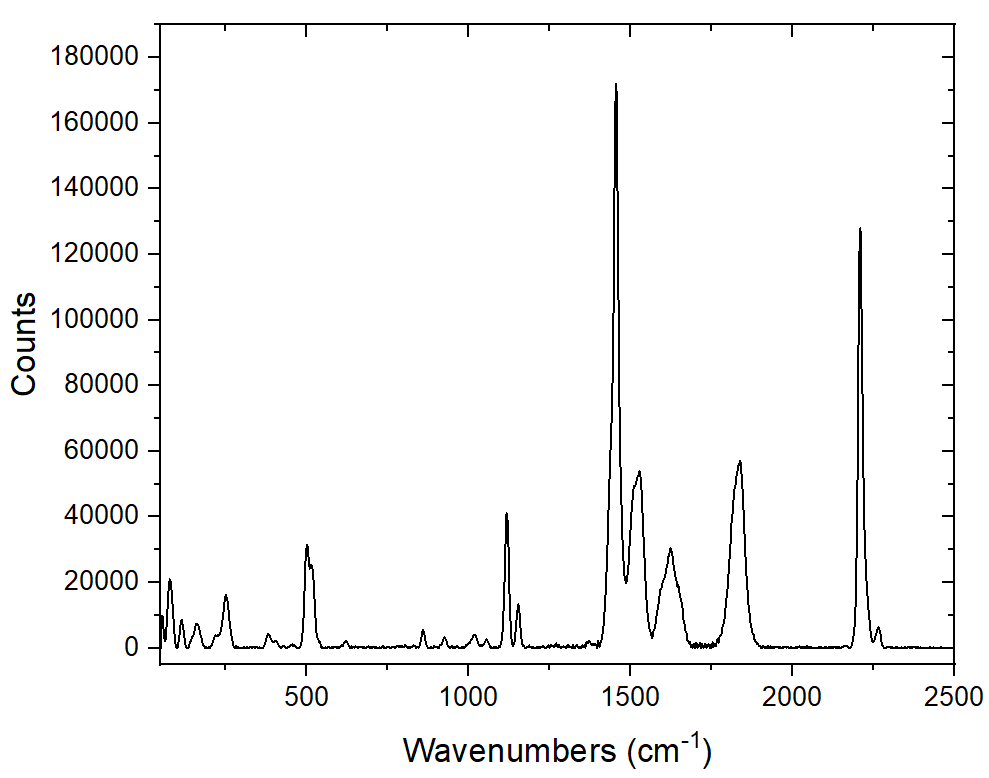


**Figure S37.** Raman spectrum of **Pr–α**


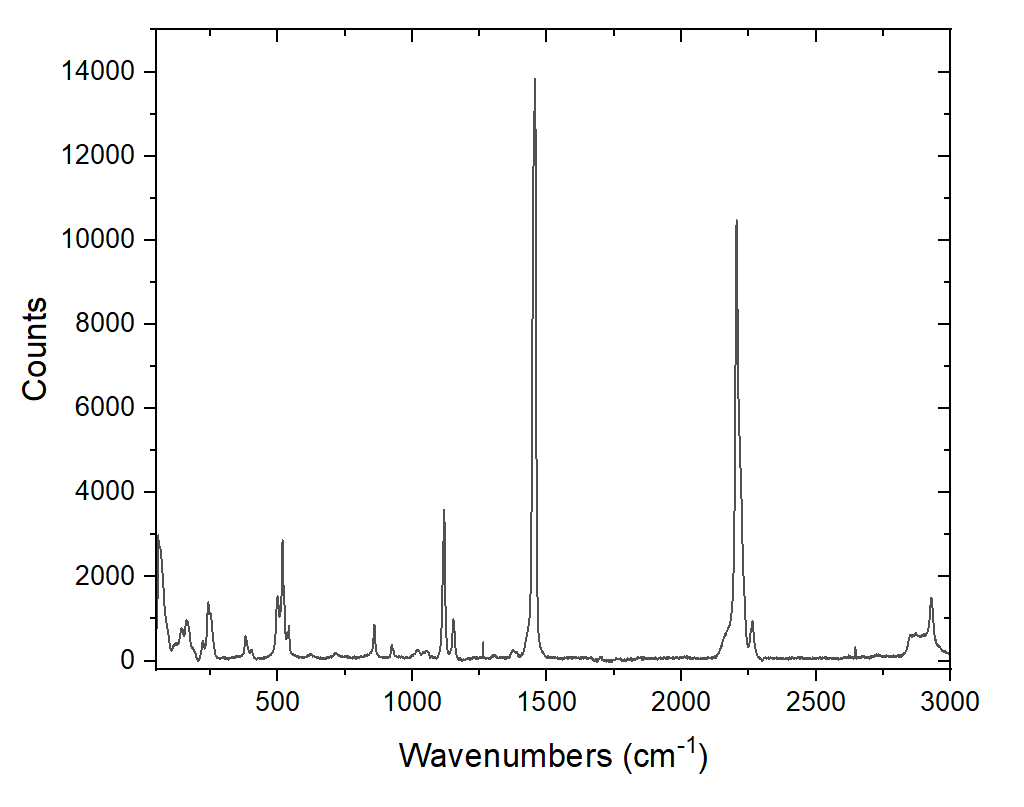


**Figure S38.** Raman spectrum of **Nd–α**.


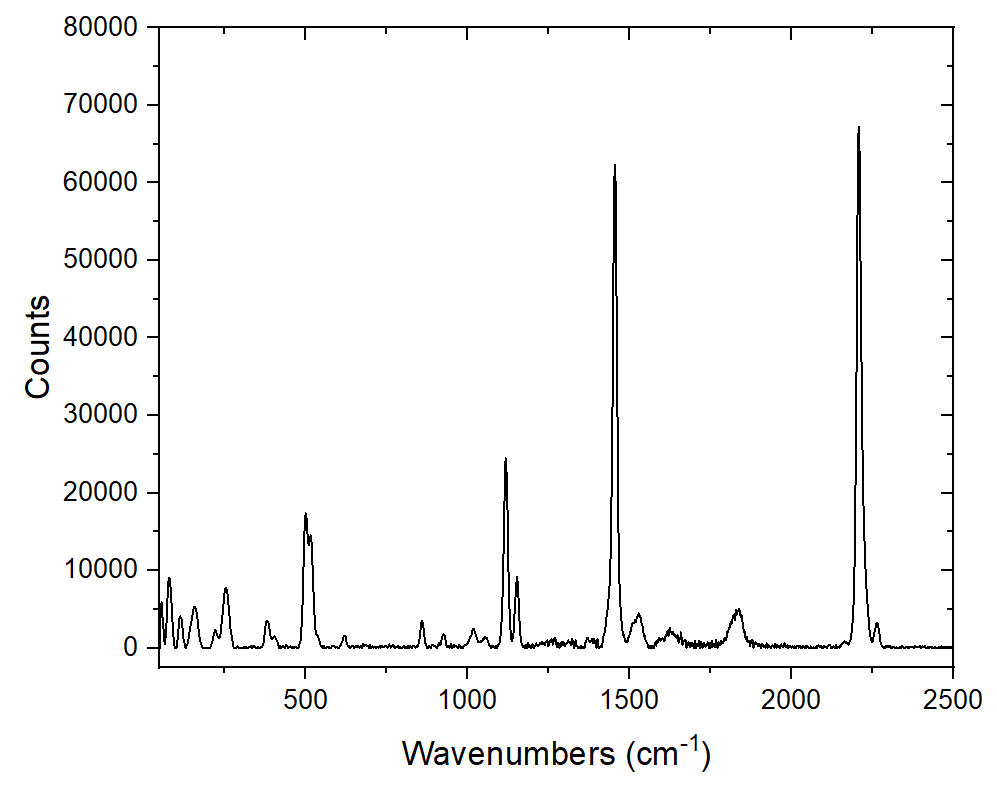


**Figure S39.** Raman spectrum of **Sm–α**.


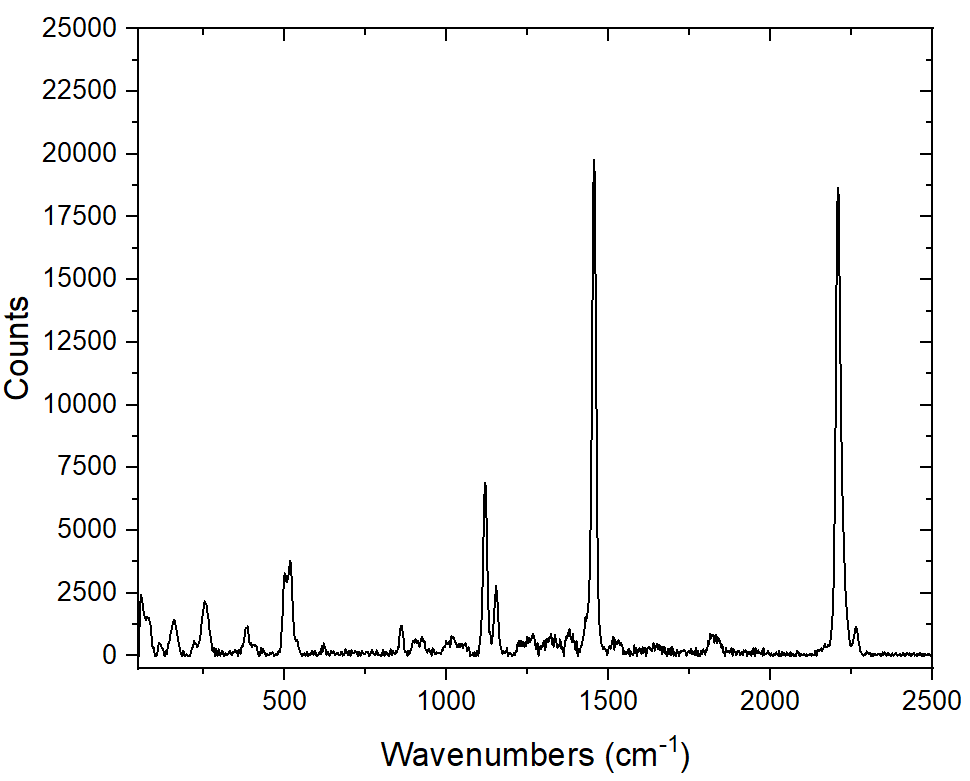


**Figure S40.** Raman spectrum of **Eu–α**.


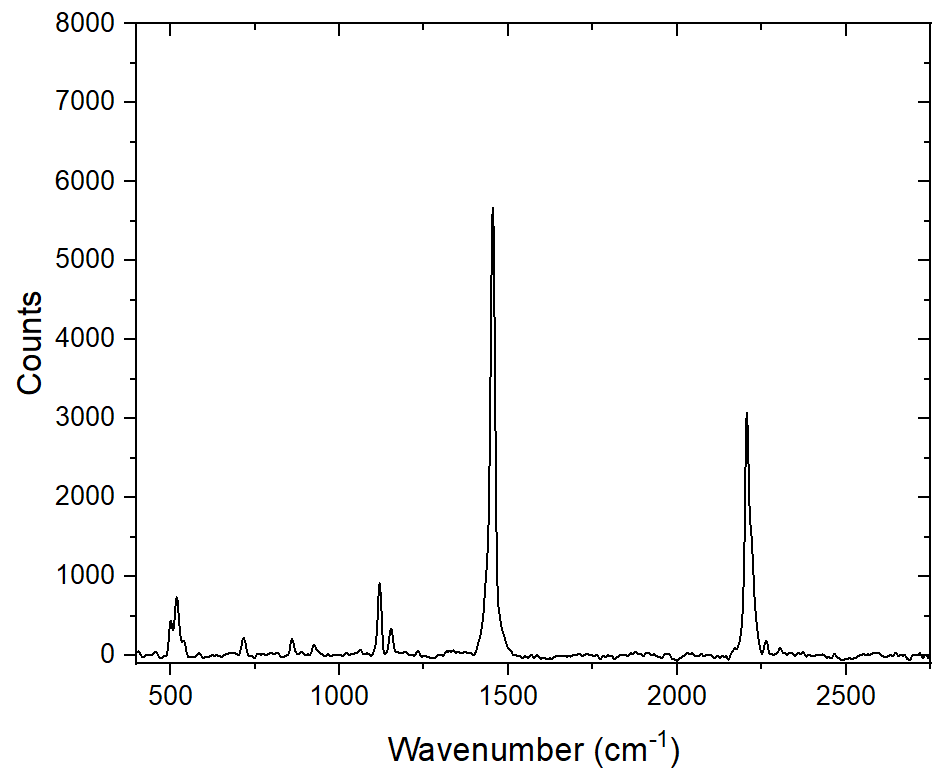


**Figure S41.** Raman spectrum of **Gd–β**.


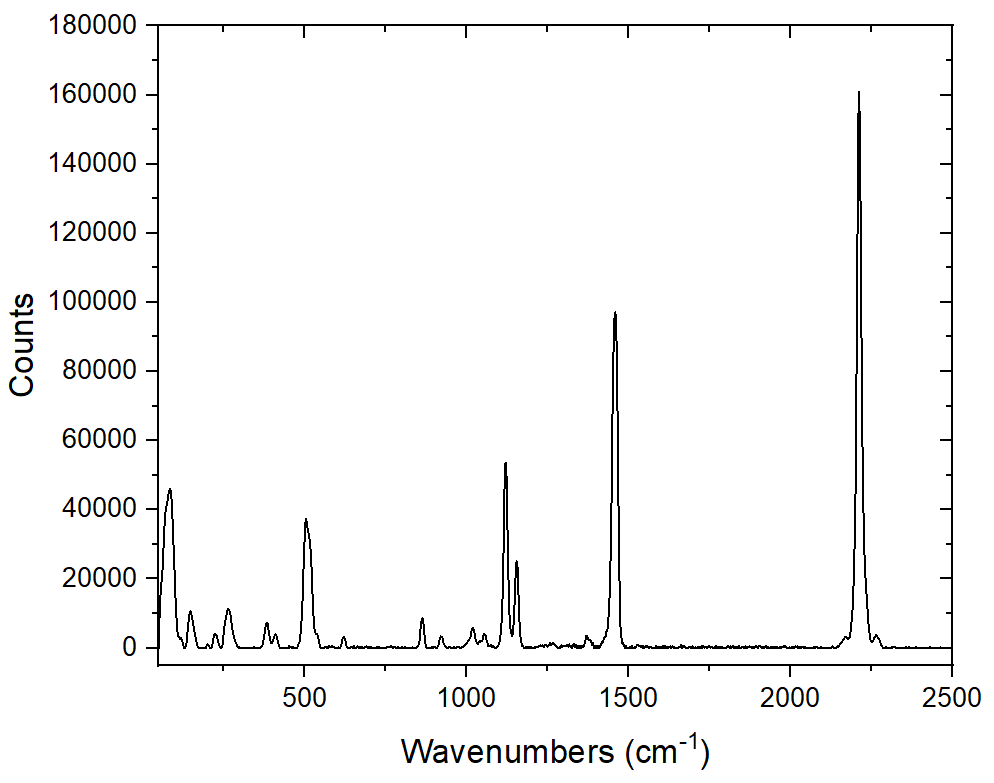


**Figure S42.** Raman spectrum of **Dy–β**.


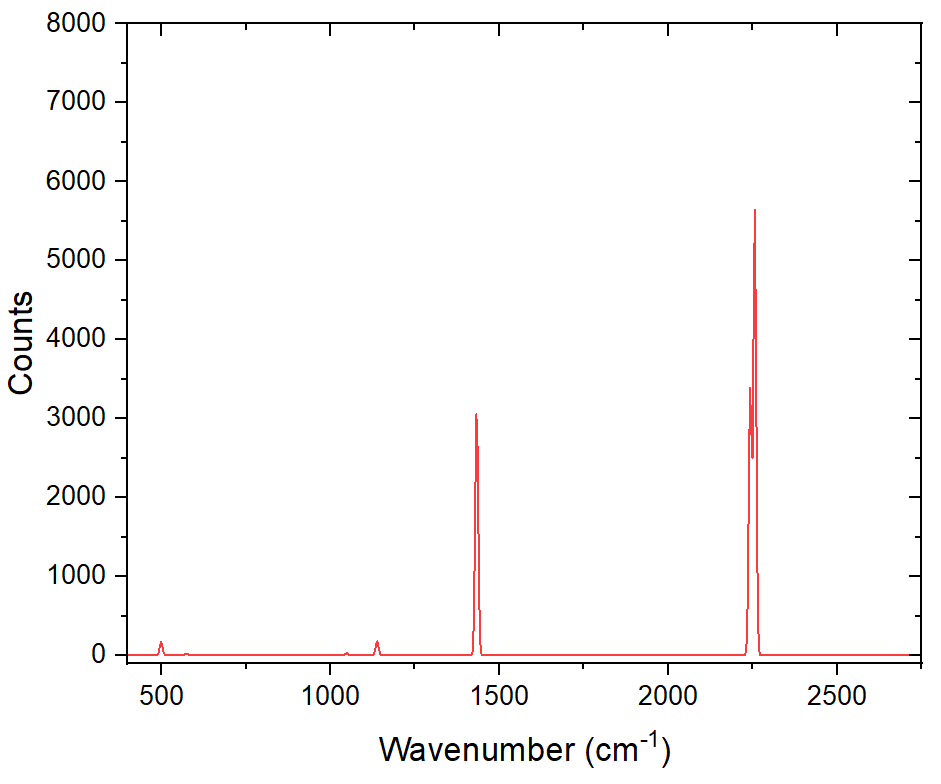


**Figure S43.** Calculated Raman spectrum of free mnt2− ligand.

|  | **Np** | **Pu** | **Am** | **Cm-α** | **Cm-β** | **Cf** |
| --- | --- | --- | --- | --- | --- | --- |
| **H** | −139.6 | −137.8 | −116.9 | −113.1 | −134.1 | −137.3 |
|  | −132.2 | −129.7 | −114.4 | −111.1 | −116.2 | −123.3 |
|  | −123.4 | −115.7 | −113.0 | −108.4 | −115.5 | −118.5 |
|  | −114.9 | −104.9 | −109.3 | −103.4 | −110.4 | −95.1 |
|  | −111.1 | −103.4 | −106.5 | −103.0 | −104.3 | −94.1 |
|  | −108.5 | −100.6 | −101.5 | −95.1 | −92.1 | −90.7 |
|  | −94.4 | −95.8 | −84.7 | −87.9 | −90.2 | −83.4 |
|  | −85.0 | −92.8 | −74.2 | −67.2 | −85.6 | −80.6 |
|  | **Np** | **Pu** | **Am** | **Cm-α** | **Cm-β** | **Cf** |
| **ρ** | 0.304 | 0.303 | 0.289 | 0.288 | 0.304 | 0.308 |
|  | 0.300 | 0.300 | 0.283 | 0.284 | 0.291 | 0.300 |
|  | 0.288 | 0.287 | 0.280 | 0.280 | 0.287 | 0.291 |
|  | 0.281 | 0.278 | 0.277 | 0.278 | 0.284 | 0.281 |
|  | 0.276 | 0.276 | 0.274 | 0.272 | 0.279 | 0.273 |
|  | 0.276 | 0.272 | 0.273 | 0.268 | 0.267 | 0.267 |
|  | 0.274 | 0.269 | 0.256 | 0.260 | 0.264 | 0.262 |
|  | 0.263 | 0.265 | 0.252 | 0.251 | 0.262 | 0.260 |
|  | **Np** | **Pu** | **Am** | **Cm-α** | **Cm-β** | **Cf** |
| **δ** | 0.420 | 0.417 | 0.396 | 0.374 | 0.384 | 0.398 |
|  | 0.413 | 0.403 | 0.380 | 0.363 | 0.367 | 0.379 |
|  | 0.402 | 0.403 | 0.377 | 0.351 | 0.360 | 0.375 |
|  | 0.388 | 0.401 | 0.375 | 0.348 | 0.360 | 0.358 |
|  | 0.379 | 0.375 | 0.363 | 0.344 | 0.345 | 0.347 |
|  | 0.371 | 0.367 | 0.359 | 0.344 | 0.340 | 0.339 |
|  | 0.365 | 0.364 | 0.358 | 0.343 | 0.333 | 0.329 |
|  | 0.358 | 0.359 | 0.341 | 0.311 | 0.329 | 0.326 |

**Table S29.** QTAIM values of the total energy density H (kJ∙mol−1∙A−3), electron density ρ (e∙Ǻ−3), and delocalization index δ at the bond critical points for each M–S bond arranged from greatest to least for each complex.


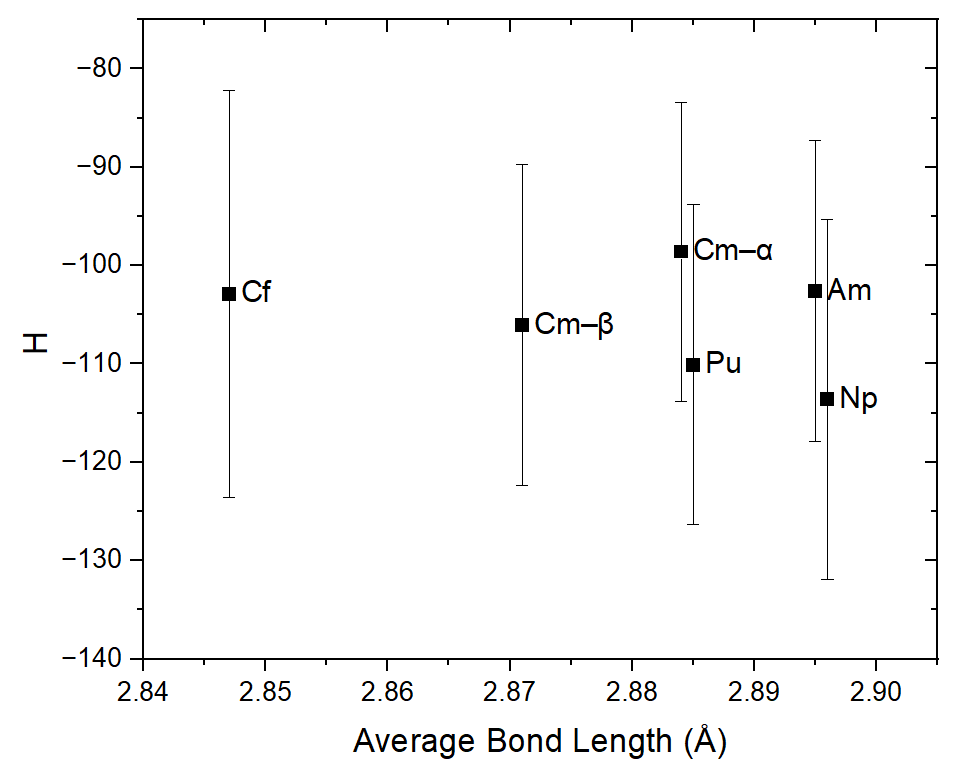

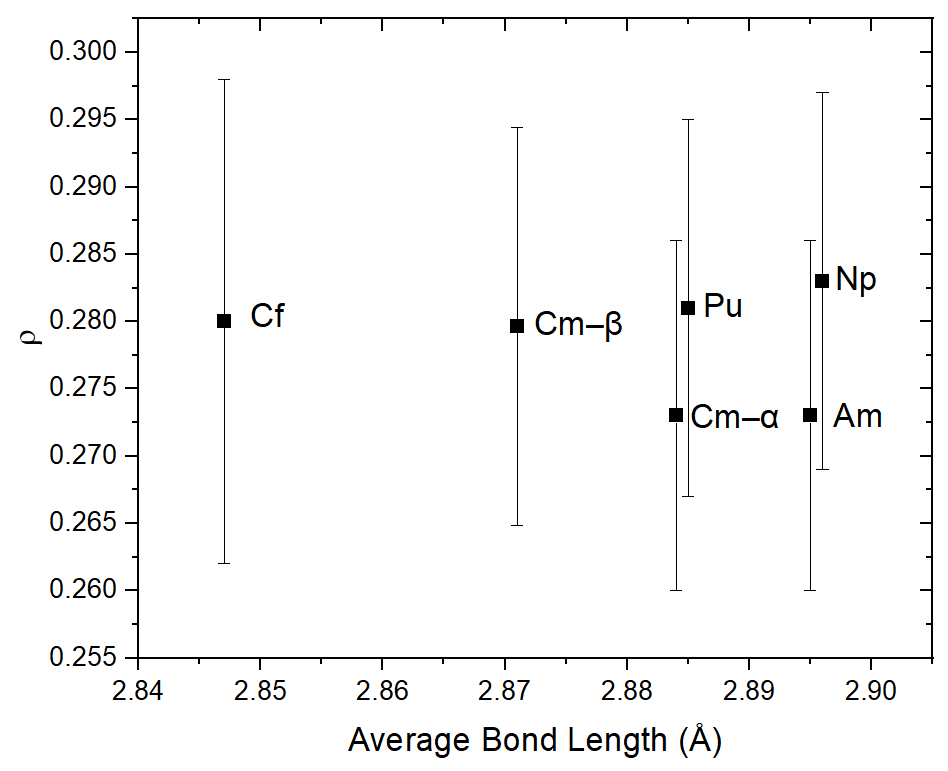

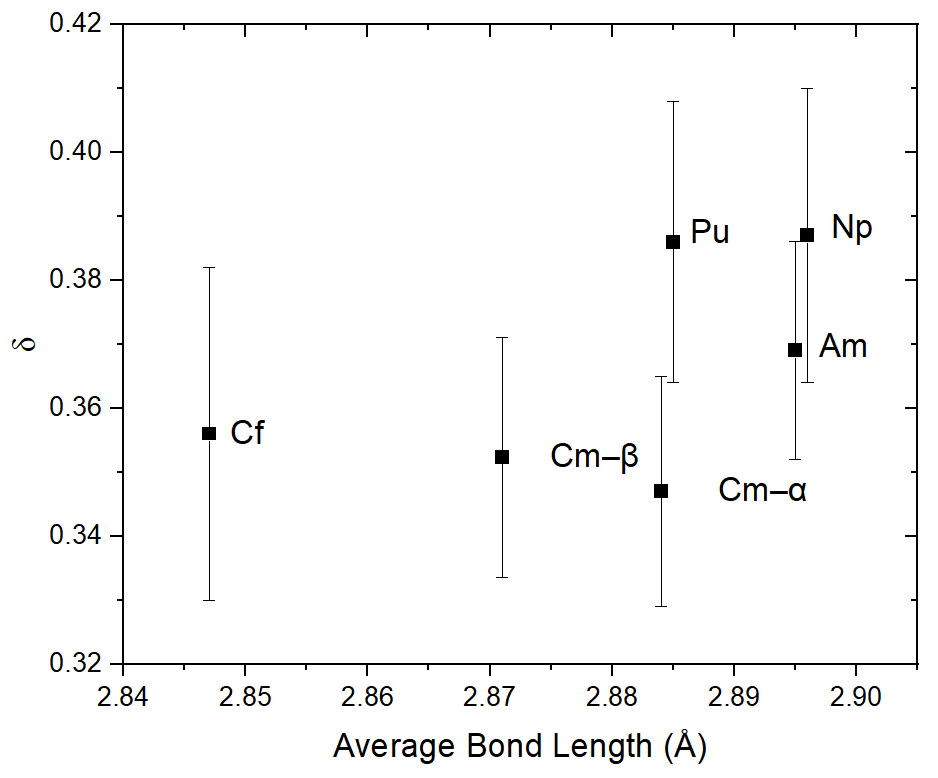


**Figure S44.** Average values of H, ρ, and δ plotted against the average M–S bond length for each complex with one standard deviation from the mean.

| Alpha Spins | |  |  |  |  |
| --- | --- | --- | --- | --- | --- |
|  | %An | %s | %p | %d | %f |
| Np | 11.55 | 2.09 | 0.03 | 7.74 | 1.70 |
| Pu | 10.87 | 2.08 | 0.03 | 7.33 | 1.43 |
| Am | 10.23 | 2.00 | 0.03 | 7.41 | 0.79 |
| Cm–α | 9.94 | 2.24 | 0.04 | 7.64 | 0.02 |
| Cm–β | 10.10 | 2.21 | 0.03 | 7.84 | 0.02 |
| Cf | 10.04 | 2.29 | 0.03 | 7.70 | 0.01 |
| Beta Spins | |  |  |  |  |
|  | %An | %s | %p | %d | %f |
| Np | 10.61 | 1.89 | 0.02 | 6.67 | 2.04 |
| Pu | 9.28 | 1.89 | 0.01 | 6.14 | 1.24 |
| Am | 8.91 | 1.84 | 0.02 | 6.18 | 0.87 |
| Cm–α | 8.56 | 1.96 | 0.02 | 5.83 | 0.75 |
| Cm–β | 9.04 | 1.93 | 0.02 | 6.28 | 0.80 |
| Cf | 10.10 | 2.18 | 0.02 | 6.72 | 1.18 |
| Combined Spins | |  |  |  |  |
|  | %An | %s | %p | %d | %f |
| Np | 11.08 | 1.99 | 0.02 | 7.20 | 1.87 |
| Pu | 10.08 | 1.98 | 0.02 | 6.74 | 1.34 |
| Am | 9.57 | 1.92 | 0.02 | 6.79 | 0.83 |
| Cm–α | 9.25 | 2.10 | 0.03 | 6.74 | 0.39 |
| Cm–β | 9.57 | 2.07 | 0.03 | 7.06 | 0.41 |
| Cf | 10.07 | 2.23 | 0.03 | 7.21 | 0.60 |

**Table S30.** Average NBO metal contributions and breakdown of contributions.

| **Np** | **Pu** | **Am** | **Cm–α** | **Cm–β** | **Cf** |
| --- | --- | --- | --- | --- | --- |
| 0.6199 | 0.5873 | 0.561 | 0.5126 | 0.5255 | 0.5579 |
| 0.5834 | 0.5374 | 0.54 | 0.4978 | 0.4907 | 0.513 |
| 0.5825 | 0.5371 | 0.5092 | 0.4794 | 0.4761 | 0.4946 |
| 0.5528 | 0.5166 | 0.4967 | 0.4737 | 0.4738 | 0.4804 |
| 0.5404 | 0.4893 | 0.491 | 0.4703 | 0.4482 | 0.4801 |
| 0.5365 | 0.4839 | 0.4797 | 0.4532 | 0.4416 | 0.4477 |
| 0.5152 | 0.482 | 0.4774 | 0.451 | 0.4406 | 0.4473 |
| 0.5103 | 0.463 | 0.4052 | 0.3597 | 0.4315 | 0.4376 |

**Table S31.** Wiberg bond indices for each M–S bond arranged from greatest to least for each complex.


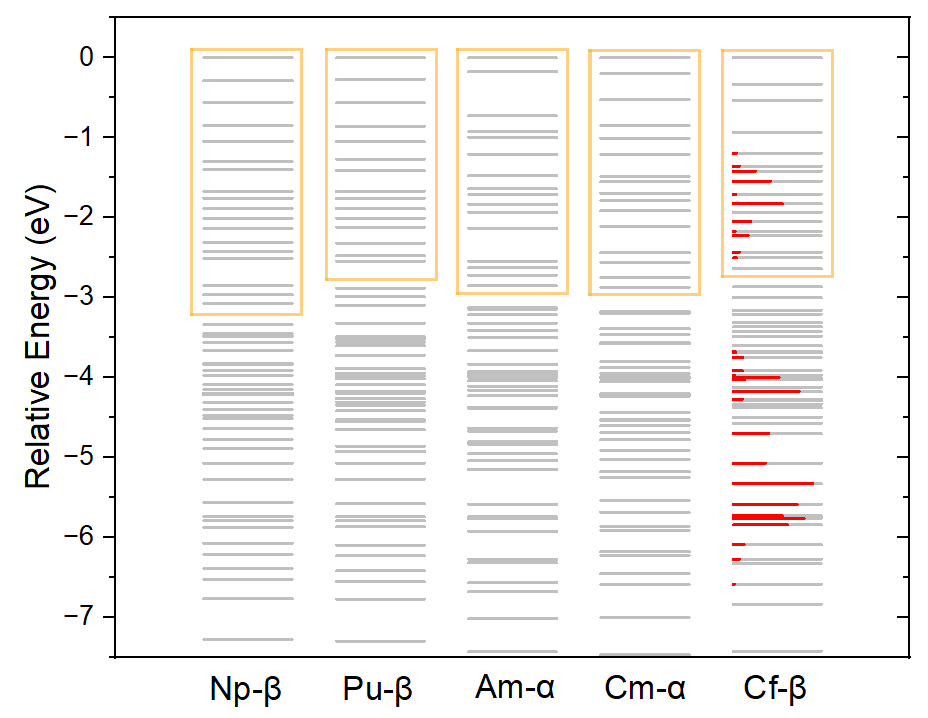


**Figure S45.** MO diagram of the beta-spin molecular orbitals. Yellow boxes enclose orbitals that are primarily sulfur in character. Red lines represent contribution of the 5*f* to the MO.


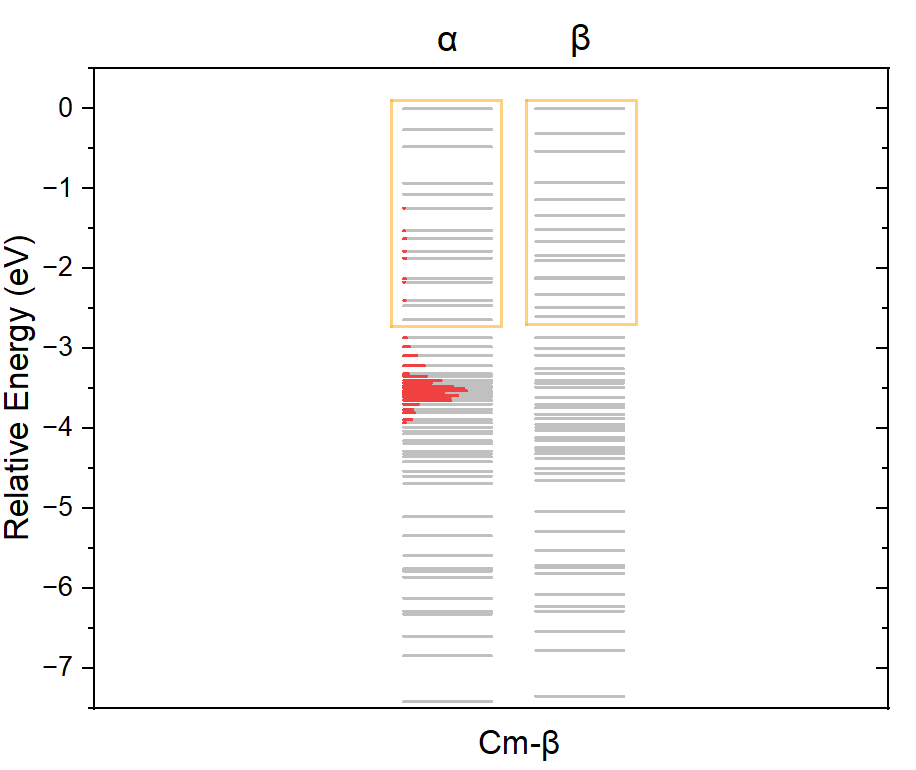


**Figure S46.** MO diagram of the alpha and beta spin molecular orbitals for **Cm–β**. Yellow boxes enclose orbitals that are primarily sulfur in character. Red lines represent contribution of the 5*f* to the MO.

**References**

1. Binnemans, K.; Görller-Walrand, C. On the Color of the Trivalent Lanthanide Ions. *Chem. Phys. Lett.* **1995**, *235* (3), 163–174.

2. Carnall, W. T.; Crosswhite, H.; Crosswhite, H. M.; Hessler, J. P.; Edelstein, N.; Conway, J. G.; Shalimoff, G. V.; Sarup, R. Energy Level Analysis of Np3+:LaCl3 and Np3+:LaBr3. *J. Chem. Phys.* **1980**, *72* (9), 5089–5102.

3. Carnall, W. T.; Fields, P. R.; Pappalardo, R. G. Absorption Spectrum of PuCl3. *J. Chem. Phys.* **1970**, *53* (7), 2922–2938.

4. Carnall, W. T.; Rajnak, K. Electronic Energy Level and Intensity Correlations in the Spectra of the Trivalent Actinide Aquo Ions. II. Cm3+. *J.Chem. Phys.* **1975**, *63* (8), 3510–3514.

5. Carnall, W. T.; Fried, S.; Wagner, F. Absorption Spectrum of CfCl3. *J. Chem. Phys.* **1973**, *58* (5), 1938–1949.

6. Pappalardo, R. G.; Carnall, W. T.; Fields, P. R. Low‐Temperature Optical Absorption of Americium Halides. *J. Chem. Phys.* **1969**, *51* (3), 1182–1200.

7. Sperling, J. M.; Gaiser, A. N.; Windorff, C. J.; Klamm, B. E.; Whitefoot, M. A.; Chemey, A. T.; Long, B. N.; Campbell, J. G.; Albrecht-Schmitt, T. E. Structural and Spectroscopic Investigation of Two Plutonium Mellitates. *Inorg. Chem.* **2020**, *59*, 3085–3090.
