# Supplementary material for: Non–linear bonding trends in maleonitrile-1,2–dithiolate complexes of the transuranium actinides (An3+ = Np3+ – Cf3+ excl. Bk3+)
Source: Research Square preprint supplement (doi:10.21203/rs.3.rs-6100125/v1), 2025-03-05
Supplement: Supplementary file 7 [file pxrd.xlsx]

## Sheet: Sheet1
2theta	la	2theta	ce	2theta	pr	2theta	nd	2theta	sm	2theta	eu	2theta	gd	2theta	dy
5.0017	0.041	5.0017	0	5.0017	0	5.0017	0	5.0017	0	5.0017	0	5.0017	0	5.0017	0
5.0261	0.052	5.0261	-0.05153	5.0261	0.041	5.0261	0.019	5.0261	-0.025	5.0261	0.019	5.0261	-0.021	5.0261	0.054
5.0504	0.082	5.0504	-0.03002	5.0504	-0.03	5.0504	-0.003	5.0504	-0.013	5.0504	-0.003	5.0504	-0.002	5.0504	0.015
5.0747	0.082	5.0747	-0.01851	5.0747	-0.029	5.0747	-0.046	5.0747	0.011	5.0747	-0.066	5.0747	-0.035	5.0747	0.028
5.099	0.052	5.099	0.044	5.099	0.055	5.099	0.008	5.099	-0.028	5.099	-0.013	5.099	-0.017	5.099	-0.031
5.1233	0.062	5.1233	0.00351	5.1233	0.046	5.1233	0.03	5.1233	0.027	5.1233	-0.053	5.1233	-0.001	5.1233	0.065
5.1477	0.103	5.1477	0.14898	5.1477	-0.004	5.1477	-0.03	5.1477	0.051	5.1477	0.042	5.1477	0.006	5.1477	0.026
5.172	0.062	5.172	0.04648	5.172	0.069	5.172	0.024	5.172	-0.008	5.172	0.033	5.172	-0.04	5.172	0.06
5.1963	0.062	5.1963	-0.08701	5.1963	0.05	5.1963	0.026	5.1963	-0.056	5.1963	0.138	5.1963	-0.002	5.1963	0.001
5.2206	0.082	5.2206	0.1095	5.2206	0.001	5.2206	0.028	5.2206	0.017	5.2206	0.036	5.2206	0.025	5.2206	0.004
5.245	0.155	5.245	-0.02303	5.245	-0.059	5.245	0.081	5.245	0.029	5.245	-0.055	5.245	-0.01	5.245	0.018
5.2693	0.113	5.2693	-0.04352	5.2693	0.066	5.2693	0.012	5.2693	-0.052	5.2693	0.081	5.2693	-0.003	5.2693	0.011
5.2936	0.113	5.2936	0.11199	5.2936	0.017	5.2936	0.096	5.2936	0.022	5.2936	-0.03	5.2936	0.004	5.2936	-0.027
5.3179	0.196	5.3179	0.1955	5.3179	0.05	5.3179	0.047	5.3179	0.045	5.3179	0.127	5.3179	-0.03	5.3179	-0.004
5.3423	0.175	5.3423	0.19597	5.3423	0.011	5.3423	0.039	5.3423	-0.025	5.3423	0.139	5.3423	0.004	5.3423	0.061
5.3666	0.124	5.3666	0.12548	5.3666	0.023	5.3666	0.032	5.3666	-0.023	5.3666	0.131	5.3666	0.018	5.3666	0.013
5.3909	0.196	5.3909	-0.03901	5.3909	0.056	5.3909	0.034	5.3909	-0.011	5.3909	-0.063	5.3909	0.011	5.3909	0.047
5.4152	0.206	5.4152	0.1265	5.4152	-0.003	5.4152	0.016	5.4152	-0.05	5.4152	0.032	5.4152	0.046	5.4152	-0.053
5.4396	0.124	5.4396	-0.03703	5.4396	0.051	5.4396	0.091	5.4396	0.056	5.4396	0.22	5.4396	-0.002	5.4396	-0.018
5.4639	0.175	5.4639	-0.04652	5.4639	0.023	5.4639	0.063	5.4639	-0.055	5.4639	0.15	5.4639	0.044	5.4639	-0.067
5.4882	0.216	5.4882	0.00498	5.4882	0.118	5.4882	0.045	5.4882	0.082	5.4882	0.08	5.4882	-0.066	5.4882	0.029
5.5125	0.186	5.5125	-0.03451	5.5125	-0.023	5.5125	-0.024	5.5125	0.043	5.5125	0.041	5.5125	0.052	5.5125	0.031
5.5368	0.144	5.5368	0.079	5.5368	0.072	5.5368	-0.031	5.5368	0.067	5.5368	0.095	5.5368	-0.016	5.5368	0.044
5.5612	0.309	5.5612	0.05947	5.5612	0.075	5.5612	0.075	5.5612	0.101	5.5612	0.149	5.5612	-0.053	5.5612	0.099
5.5855	0.206	5.5855	0.08098	5.5855	0.006	5.5855	0.037	5.5855	-0.03	5.5855	0.049	5.5855	0.075	5.5855	-0.012
5.6098	0.258	5.6098	0.05049	5.6098	0.081	5.6098	0.04	5.6098	0.025	5.6098	0.082	5.6098	0.007	5.6098	0.001
5.6341	0.33	5.6341	0	5.6341	-0.029	5.6341	0.054	5.6341	0.059	5.6341	0.198	5.6341	-0.019	5.6341	0.066
5.6585	0.278	5.6585	0.11853	5.6585	-0.067	5.6585	0.026	5.6585	-0.04	5.6585	0.047	5.6585	0.079	5.6585	-0.023
5.6828	0.268	5.6828	0.000115678	5.6828	0.039	5.6828	-0.115	5.6828	0.159	5.6828	0.111	5.6828	0.042	5.6828	-0.062
5.7071	0.33	5.7071	0.02571	5.7071	0.052	5.7071	0.085	5.7071	0.121	5.7071	0.238	5.7071	0.016	5.7071	0.035
5.7314	0.402	5.7314	-0.04071	5.7314	-0.038	5.7314	0.078	5.7314	0.022	5.7314	0.158	5.7314	-0.092	5.7314	-0.014
5.7558	0.32	5.7558	0.05682	5.7558	0.027	5.7558	-0.001	5.7558	0.16	5.7558	0.192	5.7558	-0.005	5.7558	-0.031
5.7801	0.34	5.7801	0.02041	5.7801	0.061	5.7801	0.044	5.7801	0.041	5.7801	0.267	5.7801	-0.062	5.7801	0.045
5.8044	0.443	5.8044	-0.067	5.8044	0.26	5.8044	0.027	5.8044	0.034	5.8044	0.136	5.8044	0.015	5.8044	0.038
5.8287	0.196	5.8287	-0.04141	5.8287	0.108	5.8287	0.051	5.8287	-0.033	5.8287	0.119	5.8287	-0.021	5.8287	-0.061
5.853	0.381	5.853	0.02618	5.853	-0.126	5.853	0.024	5.853	0.074	5.853	0.174	5.853	0.015	5.853	0.004
5.8774	0.392	5.8774	0.08271	5.8774	0.043	5.8774	0.204	5.8774	0.027	5.8774	0.156	5.8774	-0.031	5.8774	0.008
5.9017	0.443	5.9017	-0.01471	5.9017	0.139	5.9017	0.032	5.9017	0.114	5.9017	0.232	5.9017	-0.016	5.9017	-0.029
5.926	0.412	5.926	-0.05112	5.926	0.122	5.926	0.16	5.926	0.057	5.926	0.152	5.926	0.02	5.926	0.006
5.9503	0.351	5.9503	-0.12853	5.9503	0.094	5.9503	0.123	5.9503	0.093	5.9503	0.187	5.9503	-0.005	5.9503	-0.073
5.9747	0.351	5.9747	0	5.9747	0.211	5.9747	0.22	5.9747	-0.057	5.9747	0.2	5.9747	-0.02	5.9747	0.045
5.999	0.464	5.999	-0.09956	5.999	0.091	5.999	0.07	5.999	0	5.999	0.235	5.999	0.006	5.999	0.028
6.0233	0.412	6.0233	0.04688	6.0233	0.219	6.0233	0.095	6.0233	0.077	6.0233	0.228	6.0233	0.011	6.0233	0.001
6.0476	0.485	6.0476	-0.13568	6.0476	0.213	6.0476	0.11	6.0476	0.072	6.0476	0.221	6.0476	-0.014	6.0476	-0.118
6.072	0.505	6.072	-0.03027	6.072	0.196	6.072	0.197	6.072	0.191	6.072	0.277	6.072	-0.018	6.072	0.01
6.0963	0.423	6.0963	0.23117	6.0963	-0.016	6.0963	0.304	6.0963	0.021	6.0963	0.311	6.0963	0.142	6.0963	0.096
6.1206	0.474	6.1206	-0.14839	6.1206	0.019	6.1206	0.134	6.1206	0.12	6.1206	0.16	6.1206	-0.006	6.1206	0.049
6.1449	0.454	6.1449	0.08205	6.1449	0.105	6.1449	0.139	6.1449	-0.04	6.1449	0.164	6.1449	0	6.1449	0.074
6.1692	0.32	6.1692	-0.11151	6.1692	0.089	6.1692	0.216	6.1692	0.018	6.1692	0.302	6.1692	-0.035	6.1692	-0.117
6.1936	0.423	6.1936	-0.0571	6.1936	0.124	6.1936	0.035	6.1936	0.086	6.1936	0.244	6.1936	0.012	6.1936	0.011
6.2179	0.546	6.2179	-0.10566	6.2179	0.067	6.2179	0.081	6.2179	0.071	6.2179	0.217	6.2179	0.019	6.2179	0.026
6.2422	0.608	6.2422	-0.12422	6.2422	0.185	6.2422	0.179	6.2422	-0.087	6.2422	0.015	6.2422	0.056	6.2422	0.082
6.2665	0.536	6.2665	0.01322	6.2665	0.025	6.2665	0.256	6.2665	-0.03	6.2665	0.112	6.2665	-0.01	6.2665	0.015
6.2909	0.443	6.2909	0.21163	6.2909	0.184	6.2909	0.148	6.2909	0.018	6.2909	0.281	6.2909	-0.024	6.2909	-0.083
6.3152	0.536	6.3152	-0.03293	6.3152	0.024	6.3152	0.05	6.3152	0.025	6.3152	0.1	6.3152	0.034	6.3152	0.004
6.3395	0.526	6.3395	-0.04048	6.3395	-0.002	6.3395	0.158	6.3395	0.258	6.3395	0.423	6.3395	-0.01	6.3395	0.112
6.3638	0.546	6.3638	0.07496	6.3638	0.158	6.3638	0.205	6.3638	0.007	6.3638	0.17	6.3638	0.069	6.3638	0.096
6.3882	0.536	6.3882	-0.12863	6.3882	0.215	6.3882	-0.006	6.3882	0.086	6.3882	0.112	6.3882	-0.027	6.3882	0.05
6.4125	0.454	6.4125	-0.16619	6.4125	0.137	6.4125	0.298	6.4125	0.001	6.4125	0.21	6.4125	-0.051	6.4125	0.117
6.4368	0.546	6.4368	0.01125	6.4368	0.122	6.4368	0.056	6.4368	0.121	6.4368	0.101	6.4368	0.033	6.4368	-0.012
6.4611	0.433	6.4611	-0.09931	6.4611	0.086	6.4611	0.083	6.4611	0.046	6.4611	0.126	6.4611	0.005	6.4611	0.045
6.4854	0.515	6.4854	-0.04487	6.4854	0.03	6.4854	0.181	6.4854	0.064	6.4854	0.027	6.4854	0.017	6.4854	0.071
6.5098	0.412	6.5098	0.05054	6.5098	-0.006	6.5098	0.084	6.5098	-0.032	6.5098	-0.009	6.5098	-0.011	6.5098	-0.017
6.5341	0.526	6.5341	-0.15302	6.5341	0.113	6.5341	-0.096	6.5341	0.037	6.5341	0.171	6.5341	0.002	6.5341	0.009
6.5584	0.526	6.5584	-0.06758	6.5584	0.191	6.5584	0.085	6.5584	0.2	6.5584	0.031	6.5584	0.004	6.5584	0.087
6.5827	0.423	6.5827	-0.13714	6.5827	-0.04	6.5827	-0.032	6.5827	-0.019	6.5827	0.067	6.5827	-0.024	6.5827	-0.042
6.6071	0.454	6.6071	-0.20673	6.6071	0.172	6.6071	0.066	6.6071	-0.073	6.6071	0.092	6.6071	-0.042	6.6071	0.098
6.6314	0.381	6.6314	-0.01829	6.6314	0.168	6.6314	0.258	6.6314	0.131	6.6314	0.035	6.6314	0.054	6.6314	-0.01
6.6557	0.423	6.6557	-0.09785	6.6557	-0.105	6.6557	0.11	6.6557	-0.005	6.6557	-0.094	6.6557	0.026	6.6557	0.089
6.68	0.557	6.68	0.06959	6.68	-0.047	6.68	0.054	6.68	-0.007	6.68	0.21	6.68	-0.053	6.68	0.043
6.7044	0.536	6.7044	0	6.7044	0.042	6.7044	0.112	6.7044	0.114	6.7044	0.153	6.7044	0.043	6.7044	0.08
6.7287	0.66	6.7287	-0.13812	6.7287	-0.034	6.7287	0.149	6.7287	-0.073	6.7287	-0.017	6.7287	-0.006	6.7287	-0.059
6.753	0.474	6.753	-0.09024	6.753	-0.069	6.753	0.166	6.753	-0.023	6.753	0.04	6.753	0.028	6.753	0.102
6.7773	0.464	6.7773	-0.09436	6.7773	0.015	6.7773	0.276	6.7773	0.099	6.7773	-0.037	6.7773	-0.009	6.7773	0.036
6.8016	0.567	6.8016	-0.09848	6.8016	0.11	6.8016	-0.037	6.8016	-0.016	6.8016	-0.012	6.8016	-0.057	6.8016	-0.01
6.826	0.598	6.826	-0.03062	6.826	-0.021	6.826	-0.093	6.826	-0.027	6.826	-0.048	6.826	-0.085	6.826	-0.065
6.8503	0.608	6.8503	-0.13774	6.8503	-0.009	6.8503	0.043	6.8503	0.126	6.8503	0.185	6.8503	0.156	6.8503	-0.052
6.8746	0.577	6.8746	-0.26587	6.8746	0.128	6.8746	0.097	6.8746	0.053	6.8746	0.056	6.8746	0.036	6.8746	0.034
6.8989	0.567	6.8989	-0.17699	6.8989	0.223	6.8989	0.006	6.8989	-0.072	6.8989	-0.083	6.8989	0.009	6.8989	0.078
6.9233	0.639	6.9233	-0.14012	6.9233	0.071	6.9233	0.039	6.9233	-0.048	6.9233	0.077	6.9233	0.054	6.9233	0.04
6.9476	0.567	6.9476	-0.23725	6.9476	0.084	6.9476	-0.052	6.9476	0.018	6.9476	-0.061	6.9476	0.007	6.9476	-0.029
6.9719	0.804	6.9719	-0.07637	6.9719	-0.026	6.9719	0.187	6.9719	0.115	6.9719	-0.066	6.9719	0.114	6.9719	-0.046
6.9962	0.619	6.9962	-0.00749	6.9962	0.09	6.9962	0.292	6.9962	-0.035	6.9962	-0.05	6.9962	-0.171	6.9962	0.091
7.0206	0.598	7.0206	-0.29063	7.0206	0.011	7.0206	0.068	7.0206	0	7.0206	-0.034	7.0206	-0.001	7.0206	-0.06
7.0449	0.567	7.0449	-0.17075	7.0449	0.106	7.0449	0.06	7.0449	0.045	7.0449	-0.069	7.0449	-0.018	7.0449	0.026
7.0692	0.619	7.0692	-0.18487	7.0692	0.068	7.0692	0.145	7.0692	0.05	7.0692	0.215	7.0692	0.162	7.0692	0.029
7.0935	0.763	7.0935	-0.03499	7.0935	0.412	7.0935	0.281	7.0935	0.158	7.0935	0.138	7.0935	0.352	7.0935	0.084
7.1178	0.691	7.1178	0.04389	7.1178	0.467	7.1178	0.078	7.1178	0.1	7.1178	-0.011	7.1178	0.213	7.1178	0.263
7.1422	0.701	7.1422	-0.03225	7.1422	0.47	7.1422	0.225	7.1422	0.147	7.1422	0.171	7.1422	0.135	7.1422	0.411
7.1665	0.701	7.1665	-0.26337	7.1665	0.443	7.1665	0.382	7.1665	0.162	7.1665	-0.081	7.1665	0.068	7.1665	0.343
7.1908	0.835	7.1908	-0.12349	7.1908	0.498	7.1908	0.168	7.1908	0.301	7.1908	-0.044	7.1908	-0.082	7.1908	-0.014
7.2151	0.784	7.2151	-0.03461	7.2151	0.182	7.2151	0.532	7.2151	0.378	7.2151	-0.038	7.2151	-0.015	7.2151	-0.041
7.2395	0.835	7.2395	-0.06975	7.2395	0	7.2395	0.473	7.2395	0.456	7.2395	-0.011	7.2395	-0.031	7.2395	-0.016
7.2638	0.763	7.2638	-0.13587	7.2638	-0.078	7.2638	0.393	7.2638	0.317	7.2638	-0.046	7.2638	-0.098	7.2638	0.05
7.2881	0.742	7.2881	-0.02699	7.2881	0.132	7.2881	0.303	7.2881	0.333	7.2881	-0.184	7.2881	0.037	7.2881	0.064
7.3124	0.99	7.3124	-0.02011	7.3124	0.074	7.3124	0.224	7.3124	0.225	7.3124	0.06	7.3124	0.007	7.3124	0.017
7.3368	1.196	7.3368	-0.16925	7.3368	0.057	7.3368	0.103	7.3368	0.076	7.3368	-0.099	7.3368	-0.065	7.3368	0.072
7.3611	1.134	7.3611	-0.10037	7.3611	0.082	7.3611	-0.017	7.3611	0.113	7.3611	-0.051	7.3611	0.07	7.3611	0.077
7.3854	1.103	7.3854	-0.02249	7.3854	0.107	7.3854	0.182	7.3854	0.129	7.3854	-0.003	7.3854	-0.022	7.3854	0.215
7.4097	1.598	7.4097	-0.13962	7.4097	0.05	7.4097	0.124	7.4097	-0.143	7.4097	-0.193	7.4097	0.041	7.4097	-0.09
7.434	1.825	7.434	0.00026272	7.434	-0.018	7.434	-0.017	7.434	0.09	7.434	-0.042	7.434	0.083	7.434	0.11
7.4584	1.598	7.4584	0.26412	7.4584	0.09	7.4584	-0.096	7.4584	0.076	7.4584	-0.21	7.4584	0.116	7.4584	0.125
7.4827	1.835	7.4827	0.6	7.4827	-0.04	7.4827	0.093	7.4827	0.02	7.4827	0.054	7.4827	-0.048	7.4827	-0.066
7.507	1.856	7.507	0.51388	7.507	0.006	7.507	0.004	7.507	-0.015	7.507	-0.135	7.507	-0.016	7.507	-0.041
7.5313	1.969	7.5313	0.12776	7.5313	-0.072	7.5313	0.1	7.5313	0.126	7.5313	-0.066	7.5313	0.14	7.5313	-0.129
7.5557	1.907	7.5557	-0.16438	7.5557	0.006	7.5557	0.145	7.5557	0.04	7.5557	0.034	7.5557	0.204	7.5557	0.049
7.58	1.825	7.58	0.0375	7.58	0.041	7.58	0.19	7.58	0.222	7.58	0.154	7.58	0.484	7.58	0.125
7.6043	1.711	7.6043	-0.40962	7.6043	0.088	7.6043	0.009	7.6043	0.002	7.6043	-0.334	7.6043	0.527	7.6043	0.179
7.6286	1.763	7.6286	0.04926	7.6286	0.093	7.6286	0.095	7.6286	-0.073	7.6286	-0.028	7.6286	0.209	7.6286	0.131
7.653	1.68	7.653	-0.25288	7.653	-0.149	7.653	0.161	7.653	-0.039	7.653	0.206	7.653	0.376	7.653	0.268
7.6773	1.546	7.6773	0	7.6773	-0.082	7.6773	0.093	7.6773	0.036	7.6773	-0.147	7.6773	0.522	7.6773	0.24
7.7016	1.68	7.7016	-0.0419	7.7016	0.036	7.7016	0.149	7.7016	-0.043	7.7016	-0.161	7.7016	0.442	7.7016	0.151
7.7259	1.464	7.7259	-0.19779	7.7259	0.041	7.7259	0.246	7.7259	0.084	7.7259	0.052	7.7259	0.31	7.7259	0.278
7.7502	1.567	7.7502	0.16231	7.7502	-0.108	7.7502	0.23	7.7502	-0.026	7.7502	0.037	7.7502	0.302	7.7502	0.426
7.7746	1.495	7.7746	-0.02359	7.7746	-0.031	7.7746	0.224	7.7746	0.133	7.7746	0.002	7.7746	0.645	7.7746	0.233
7.7989	1.722	7.7989	-0.07649	7.7989	-0.015	7.7989	-0.081	7.7989	0.064	7.7989	0.143	7.7989	0.647	7.7989	0.206
7.8232	1.196	7.8232	-0.10838	7.8232	0.166	7.8232	0.047	7.8232	-0.076	7.8232	0.108	7.8232	0.67	7.8232	0.199
7.8475	1.268	7.8475	-0.14028	7.8475	0.295	7.8475	-0.093	7.8475	-0.064	7.8475	-0.071	7.8475	0.972	7.8475	0.522
7.8719	1.649	7.8719	-0.18218	7.8719	0.301	7.8719	-0.006	7.8719	0.114	7.8719	-0.054	7.8719	0.727	7.8719	0.268
7.8962	1.32	7.8962	-0.17308	7.8962	0.533	7.8962	0.164	7.8962	-0.09	7.8962	0.035	7.8962	0.39	7.8962	0.592
7.9205	1.34	7.9205	0.07402	7.9205	0.323	7.9205	0.344	7.9205	0.119	7.9205	0.031	7.9205	0.557	7.9205	0.503
7.9448	1.299	7.9448	0.04213	7.9448	0.483	7.9448	0.153	7.9448	0.256	7.9448	0.389	7.9448	0.385	7.9448	0.249
7.9692	1.289	7.9692	-0.09277	7.9692	0.696	7.9692	-0.027	7.9692	0.197	7.9692	0.189	7.9692	0.491	7.9692	1.016
7.9935	1.32	7.9935	0.18433	7.9935	0.3	7.9935	0.112	7.9935	0.076	7.9935	0.258	7.9935	0.752	7.9935	1.896
8.0178	1.196	8.0178	-0.09457	8.0178	0.326	8.0178	0.117	8.0178	-0.127	8.0178	-0.003	8.0178	0.673	8.0178	2.952
8.0421	1.361	8.0421	0.08954	8.0421	0.508	8.0421	0.328	8.0421	0.01	8.0421	0.096	8.0421	0.831	8.0421	6.492
8.0664	1.423	8.0664	-0.24136	8.0664	0.638	8.0664	0.292	8.0664	-0.121	8.0664	0.444	8.0664	1.422	8.0664	10.651
8.0908	1.639	8.0908	-0.04626	8.0908	1.335	8.0908	0.658	8.0908	0.048	8.0908	0.378	8.0908	1.291	8.0908	13.717
8.1151	1.546	8.1151	0.01484	8.1151	3.187	8.1151	0.901	8.1151	-0.073	8.1151	1.004	8.1151	1.006	8.1151	14.814
8.1394	1.433	8.1394	-0.01705	8.1394	4.513	8.1394	1.545	8.1394	0.044	8.1394	1.228	8.1394	1.216	8.1394	13.262
8.1637	1.639	8.1637	0.08505	8.1637	5.984	8.1637	1.293	8.1637	0.058	8.1637	0.957	8.1637	1.715	8.1637	9.72
8.1881	1.649	8.1881	-0.16285	8.1881	7.599	8.1881	1	8.1881	0.093	8.1881	1.448	8.1881	1.574	8.1881	8.683
8.2124	1.773	8.2124	0.26925	8.2124	8.709	8.2124	1.108	8.2124	0.108	8.2124	3.229	8.2124	1.341	8.2124	8.801
8.2367	1.67	8.2367	0.19636	8.2367	8.695	8.2367	0.588	8.2367	0.534	8.2367	4.288	8.2367	0.984	8.2367	4.672
8.261	1.753	8.261	0.34946	8.261	8.589	8.261	0.408	8.261	1.858	8.261	2.883	8.261	1.112	8.261	3.347
8.2854	1.845	8.2854	0.33856	8.2854	5.493	8.2854	0.177	8.2854	3.13	8.2854	0.921	8.2854	0.673	8.2854	5.568
8.3097	2.021	8.3097	0.29666	8.3097	3.274	8.3097	0.297	8.3097	3.3	8.3097	0.362	8.3097	0.389	8.3097	10.284
8.334	2.041	8.334	0.34676	8.334	1.312	8.334	0.333	8.334	3.346	8.334	0.452	8.334	0.702	8.334	19.629
8.3583	2.216	8.3583	0.09887	8.3583	0.618	8.3583	0.175	8.3583	1.587	8.3583	0.243	8.3583	0.81	8.3583	26.253
8.3826	2.247	8.3826	0.12897	8.3826	0.419	8.3826	0.346	8.3826	1.025	8.3826	0.189	8.3826	1.186	8.3826	23.093
8.407	2.876	8.407	0.33407	8.407	0.489	8.407	0.207	8.407	3.061	8.407	0.712	8.407	0.922	8.407	15.294
8.4313	3.454	8.4313	0.49817	8.4313	0.239	8.4313	0.224	8.4313	5.365	8.4313	1.184	8.4313	0.288	8.4313	7.732
8.4556	4.031	8.4556	0.30128	8.4556	0.638	8.4556	0.148	8.4556	3.576	8.4556	0.697	8.4556	0.406	8.4556	5.201
8.4799	4.196	8.4799	0.12538	8.4799	0.172	8.4799	0.608	8.4799	1.612	8.4799	0.447	8.4799	0.628	8.4799	3.969
8.5043	6.567	8.5043	1.05248	8.5043	0.551	8.5043	0.006	8.5043	0.772	8.5043	0.084	8.5043	0.87	8.5043	2.573
8.5286	11.577	8.5286	1.99958	8.5286	0.487	8.5286	0.404	8.5286	0.097	8.5286	0.061	8.5286	1.411	8.5286	1.64
8.5529	13.237	8.5529	3.51469	8.5529	0.186	8.5529	0.112	8.5529	0	8.5529	0.069	8.5529	1.921	8.5529	1.295
8.5772	9.062	8.5772	2.66779	8.5772	0.328	8.5772	0.593	8.5772	0.315	8.5772	0.056	8.5772	1.957	8.5772	1.527
8.6016	5.619	8.6016	0.45089	8.6016	0.14	8.6016	0.28	8.6016	0.022	8.6016	-0.111	8.6016	2.272	8.6016	2.007
8.6259	4.979	8.6259	0.75899	8.6259	0.262	8.6259	0.132	8.6259	0.131	8.6259	-0.113	8.6259	2.979	8.6259	4.549
8.6502	4.784	8.6502	0.58309	8.6502	0.528	8.6502	0.067	8.6502	-0.007	8.6502	0.277	8.6502	3.933	8.6502	10.451
8.6745	4.433	8.6745	0.2422	8.6745	0.526	8.6745	0.579	8.6745	0.102	8.6745	-0.024	8.6745	4.577	8.6745	4.632
8.6989	4.546	8.6989	0.2303	8.6989	0.731	8.6989	0.833	8.6989	0.046	8.6989	0.366	8.6989	4.727	8.6989	1.226
8.7232	4.67	8.7232	0.2504	8.7232	0.451	8.7232	0.944	8.7232	0.166	8.7232	0.302	8.7232	2.97	8.7232	1.046
8.7475	4.464	8.7475	0.2395	8.7475	0.635	8.7475	1.209	8.7475	0.069	8.7475	0.321	8.7475	2.615	8.7475	0.753
8.7718	4.68	8.7718	0.48561	8.7718	0.541	8.7718	0.659	8.7718	0.179	8.7718	0.092	8.7718	2.302	8.7718	0.625
8.7961	5.485	8.7961	0.42271	8.7961	0.673	8.7961	0.574	8.7961	0.361	8.7961	0.142	8.7961	2.308	8.7961	0.59
8.8205	6.144	8.8205	0.53581	8.8205	0.94	8.8205	1.333	8.8205	0.285	8.8205	0.419	8.8205	3.304	8.8205	0.39
8.8448	6.186	8.8448	0.60691	8.8448	0.784	8.8448	5.063	8.8448	0.354	8.8448	3.397	8.8448	3.867	8.8448	0.324
8.8691	5.948	8.8691	0.53402	8.8691	0.773	8.8691	10.586	8.8691	0.753	8.8691	10.302	8.8691	5.337	8.8691	1.021
8.8934	6.299	8.8934	0.49112	8.8934	1.813	8.8934	14.82	8.8934	1.905	8.8934	6.847	8.8934	6.106	8.8934	0.955
8.9178	6.381	8.9178	0.62422	8.9178	3.957	8.9178	13.013	8.9178	5.819	8.9178	2.042	8.9178	5.907	8.9178	0.498
8.9421	6.082	8.9421	0.99432	8.9421	10.78	8.9421	7.918	8.9421	10.569	8.9421	0.824	8.9421	3.851	8.9421	0.36
8.9664	6.835	8.9664	1.10743	8.9664	22.914	8.9664	3.895	8.9664	7.483	8.9664	0.41	8.9664	3.858	8.9664	0.532
8.9907	7.433	8.9907	1.38453	8.9907	32.398	8.9907	1.83	8.9907	4.903	8.9907	0.357	8.9907	3.339	8.9907	0.332
9.0151	7.619	9.0151	2.00263	9.0151	30.263	9.0151	0.735	9.0151	2.489	9.0151	0.552	9.0151	3.181	9.0151	0.431
9.0394	8.485	9.0394	3.63073	9.0394	24.53	9.0394	0.753	9.0394	1.063	9.0394	0.633	9.0394	3.58	9.0394	1.325
9.0637	9.825	9.0637	3.28883	9.0637	17.159	9.0637	0.803	9.0637	2.36	9.0637	2.488	9.0637	7.978	9.0637	1.208
9.088	11.165	9.088	2.12294	9.088	9.818	9.088	0.563	9.088	3.183	9.088	5.322	9.088	14.728	9.088	0.978
9.1123	12.938	9.1123	2.50404	9.1123	5.859	9.1123	0.778	9.1123	2.933	9.1123	5.187	9.1123	13.663	9.1123	1.252
9.1367	25.691	9.1367	2.36914	9.1367	3.189	9.1367	0.776	9.1367	2.622	9.1367	4.722	9.1367	10.165	9.1367	2.156
9.161	44.351	9.161	2.25524	9.161	2.705	9.161	0.99	9.161	2.723	9.161	6.082	9.161	9.379	9.161	2.246
9.1853	44.567	9.1853	6.17135	9.1853	3.952	9.1853	1.019	9.1853	6.144	9.1853	5.576	9.1853	6.623	9.1853	2.397
9.2096	38.588	9.2096	14.1295	9.2096	11.818	9.2096	1.162	9.2096	7.864	9.2096	2.863	9.2096	3.93	9.2096	2.136
9.234	36.258	9.234	24.5405	9.234	23.519	9.234	0.954	9.234	8.605	9.234	2.079	9.234	2.989	9.234	3.175
9.2583	33.082	9.2583	31.3437	9.2583	18.973	9.2583	0.973	9.2583	9.696	9.2583	1.367	9.2583	2.78	9.2583	2.079
9.2826	26.99	9.2826	41.0748	9.2826	12.345	9.2826	0.837	9.2826	7.818	9.2826	1.49	9.2826	2.128	9.2826	1.385
9.3069	16.742	9.3069	51.9609	9.3069	11.417	9.3069	0.784	9.3069	7.766	9.3069	0.954	9.3069	1.538	9.3069	1.681
9.3313	12.845	9.3313	46.743	9.3313	12.325	9.3313	0.782	9.3313	10.847	9.3313	0.757	9.3313	1.495	9.3313	2.328
9.3556	11.175	9.3556	42.6501	9.3556	10.759	9.3556	1.358	9.3556	8.826	9.3556	0.674	9.3556	2.884	9.3556	2.799
9.3799	6.887	9.3799	31.2772	9.3799	7.605	9.3799	2.13	9.3799	10.258	9.3799	1.365	9.3799	4.161	9.3799	2.054
9.4042	5.268	9.4042	22.7923	9.4042	5.544	9.4042	7.685	9.4042	12.154	9.4042	2.251	9.4042	2.756	9.4042	3.186
9.4285	4.34	9.4285	14.5434	9.4285	3.813	9.4285	16.241	9.4285	13.06	9.4285	2.127	9.4285	3.394	9.4285	6.843
9.4529	4.711	9.4529	12.5535	9.4529	4.762	9.4529	22.59	9.4529	11.287	9.4529	1.889	9.4529	5.763	9.4529	10.088
9.4772	6.113	9.4772	17.6966	9.4772	5.175	9.4772	27.352	9.4772	13.987	9.4772	2.219	9.4772	7.607	9.4772	10.127
9.5015	6.835	9.5015	17.8197	9.5015	8.527	9.5015	25.939	9.5015	21.348	9.5015	2.93	9.5015	5.378	9.5015	7.382
9.5258	5.031	9.5258	14.3758	9.5258	16.848	9.5258	15.381	9.5258	32.327	9.5258	2.188	9.5258	3.634	9.5258	4.483
9.5502	3.113	9.5502	10.0859	9.5502	25.746	9.5502	8.504	9.5502	27.276	9.5502	1.043	9.5502	3.952	9.5502	3.553
9.5745	2.68	9.5745	4.48698	9.5745	22.057	9.5745	5.245	9.5745	11.018	9.5745	1.116	9.5745	5.961	9.5745	4.159
9.5988	2.804	9.5988	1.95009	9.5988	10.265	9.5988	4.523	9.5988	3.503	9.5988	0.775	9.5988	6.877	9.5988	3.816
9.6231	2.866	9.6231	2.15519	9.6231	3.73	9.6231	2.625	9.6231	1.843	9.6231	0.322	9.6231	3.289	9.6231	2.979
9.6475	2.784	9.6475	2.51529	9.6475	2.144	9.6475	0.872	9.6475	1.668	9.6475	0.57	9.6475	1.566	9.6475	2.946
9.6718	2.887	9.6718	2.30839	9.6718	1.496	9.6718	0.82	9.6718	0.751	9.6718	0.126	9.6718	1.317	9.6718	3.913
9.6961	2.67	9.6961	1.8635	9.6961	0.828	9.6961	0.747	9.6961	0.948	9.6961	0.158	9.6961	1.708	9.6961	4.664
9.7204	3.557	9.7204	1.2136	9.7204	0.985	9.7204	0.799	9.7204	0.928	9.7204	0.24	9.7204	1.449	9.7204	4.477
9.7447	3.32	9.7447	1.1407	9.7447	0.729	9.7447	1.087	9.7447	1.269	9.7447	0.385	9.7447	1.645	9.7447	4.691
9.7691	3.082	9.7691	1.0778	9.7691	0.803	9.7691	1.066	9.7691	1.177	9.7691	0.2	9.7691	1.675	9.7691	5.71
9.7934	2.897	9.7934	1.13891	9.7934	0.774	9.7934	1.014	9.7934	1.477	9.7934	0.221	9.7934	1.973	9.7934	4.121
9.8177	2.876	9.8177	1.30301	9.8177	0.674	9.8177	1.323	9.8177	1.293	9.8177	0.057	9.8177	2.148	9.8177	2.346
9.842	2.485	9.842	0.81711	9.842	0.82	9.842	1.725	9.842	1.202	9.842	0.325	9.842	1.714	9.842	1.025
9.8664	2.68	9.8664	0.83721	9.8664	1.06	9.8664	1.829	9.8664	1.378	9.8664	0.171	9.8664	2.364	9.8664	0.776
9.8907	2.763	9.8907	1.41331	9.8907	1.609	9.8907	1.334	9.8907	1.576	9.8907	0.131	9.8907	5.137	9.8907	0.373
9.915	3.237	9.915	3.79442	9.915	2.137	9.915	1.334	9.915	1.34	9.915	0.183	9.915	6.435	9.915	0.33
9.9393	3.876	9.9393	6.56652	9.9393	2.583	9.9393	1.066	9.9393	1.703	9.9393	0.101	9.9393	6.332	9.9393	0.411
9.9637	5.32	9.9637	8.89562	9.9637	4.184	9.9637	0.902	9.9637	2.004	9.9637	0.494	9.9637	4.105	9.9637	0.709
9.988	7.536	9.988	13.0177	9.988	6.022	9.988	1.118	9.988	2.861	9.988	0.021	9.988	2.281	9.988	0.347
10.0123	8.866	10.0123	15.9448	10.0123	9.983	10.0123	1.562	10.0123	4.369	10.0123	0.249	10.0123	1.786	10.0123	0.264
10.0366	12.454	10.0366	19.2529	10.0366	12.409	10.0366	2.831	10.0366	6.113	10.0366	0.085	10.0366	2.683	10.0366	0.036
10.0609	17.794	10.0609	22.273	10.0609	16.35	10.0609	5.429	10.0609	8.064	10.0609	0.086	10.0609	3.849	10.0609	0.705
10.0853	20.732	10.0853	20.4471	10.0853	19.281	10.0853	9.327	10.0853	10.53	10.0853	0.169	10.0853	5.488	10.0853	1.281
10.1096	23.299	10.1096	14.9722	10.1096	19.522	10.1096	12.699	10.1096	13.316	10.1096	0.263	10.1096	6.911	10.1096	1.116
10.1339	24.423	10.1339	6.99234	10.1339	20.907	10.1339	18.019	10.1339	22.041	10.1339	0.192	10.1339	7.891	10.1339	0.661
10.1582	24.134	10.1582	3.06344	10.1582	18.374	10.1582	24.824	10.1582	39.518	10.1582	0.719	10.1582	7.655	10.1582	0.753
10.1826	18.536	10.1826	2.09354	10.1826	13.893	10.1826	28.34	10.1826	64.036	10.1826	1.195	10.1826	7.635	10.1826	1.433
10.2069	10.629	10.2069	1.22664	10.2069	7.701	10.2069	28.578	10.2069	86.184	10.2069	2.732	10.2069	5.956	10.2069	2.247
10.2312	5.485	10.2312	1.31875	10.2312	3.622	10.2312	31.909	10.2312	89.64	10.2312	4.26	10.2312	5.297	10.2312	2.813
10.2555	3.021	10.2555	1.07985	10.2555	2.378	10.2555	30.859	10.2555	78.211	10.2555	5.416	10.2555	10.205	10.2555	2.947
10.2799	2.237	10.2799	1.20295	10.2799	1.29	10.2799	21.035	10.2799	65.018	10.2799	5.077	10.2799	29.598	10.2799	3.73
10.3042	2.227	10.3042	1.84105	10.3042	0.716	10.3042	9.686	10.3042	55.816	10.3042	4.471	10.3042	35.455	10.3042	4.771
10.3285	2.144	10.3285	2.55216	10.3285	0.442	10.3285	3.894	10.3285	41.86	10.3285	2.307	10.3285	21.869	10.3285	3.874
10.3528	1.845	10.3528	1.75726	10.3528	0.281	10.3528	2.266	10.3528	25.534	10.3528	1.134	10.3528	10.633	10.3528	1.585
10.3771	1.825	10.3771	1.63236	10.3771	0.296	10.3771	0.793	10.3771	15.043	10.3771	0.867	10.3771	6.851	10.3771	0.368
10.4015	2.031	10.4015	1.44646	10.4015	0.496	10.4015	0.949	10.4015	9.738	10.4015	1.55	10.4015	6.172	10.4015	0.554
10.4258	1.938	10.4258	1.24957	10.4258	0.552	10.4258	0.776	10.4258	7.02	10.4258	3.51	10.4258	5.091	10.4258	0.482
10.4501	1.742	10.4501	0.40267	10.4501	0.391	10.4501	0.798	10.4501	4.829	10.4501	3.595	10.4501	4.753	10.4501	0.739
10.4744	1.918	10.4744	0.22677	10.4744	0.375	10.4744	0.759	10.4744	2.534	10.4744	2.679	10.4744	4.157	10.4744	0.894
10.4988	1.763	10.4988	-0.04213	10.4988	0.328	10.4988	0.585	10.4988	1.765	10.4988	1.094	10.4988	4.674	10.4988	0.936
10.5231	1.753	10.5231	0.02898	10.5231	0.488	10.5231	0.597	10.5231	1.976	10.5231	0.735	10.5231	6.109	10.5231	0.833
10.5474	1.67	10.5474	0.09008	10.5474	0.297	10.5474	0.733	10.5474	1.568	10.5474	0.696	10.5474	5.338	10.5474	0.648
10.5717	1.773	10.5717	0.23318	10.5717	0.075	10.5717	0.509	10.5717	1.697	10.5717	0.925	10.5717	3.578	10.5717	0.648
10.5961	1.371	10.5961	0.62428	10.5961	0.266	10.5961	0.521	10.5961	1.217	10.5961	0.968	10.5961	2.508	10.5961	0.411
10.6204	1.876	10.6204	2.92238	10.6204	-0.039	10.6204	0.379	10.6204	1.335	10.6204	1.187	10.6204	1.665	10.6204	0.34
10.6447	1.629	10.6447	4.29249	10.6447	0.059	10.6447	0.329	10.6447	0.949	10.6447	0.87	10.6447	2.018	10.6447	0.113
10.669	1.485	10.669	2.04459	10.669	0.034	10.669	-0.019	10.669	0.748	10.669	0.563	10.669	1.546	10.669	0.042
10.6933	1.732	10.6933	0.32169	10.6933	0.256	10.6933	0.2	10.6933	0.918	10.6933	0.679	10.6933	1.281	10.6933	0.022
10.7177	1.485	10.7177	0.13579	10.7177	-0.11	10.7177	-0.004	10.7177	0.676	10.7177	0.64	10.7177	1.201	10.7177	0.126
10.742	1.619	10.742	-0.0301	10.742	0.287	10.742	0.122	10.742	0.207	10.742	0.344	10.742	1.008	10.742	-0.059
10.7663	1.454	10.7663	0	10.7663	0.045	10.7663	0.104	10.7663	0.079	10.7663	0.13	10.7663	0.784	10.7663	0.065
10.7906	1.876	10.7906	-0.17826	10.7906	-0.042	10.7906	0.128	10.7906	0.167	10.7906	0.04	10.7906	0.993	10.7906	0.046
10.815	1.794	10.815	-0.12948	10.815	-0.191	10.815	0.192	10.815	0.204	10.815	0.197	10.815	1.161	10.815	0.181
10.8393	1.887	10.8393	-0.23474	10.8393	0.045	10.8393	-0.083	10.8393	0.272	10.8393	0.086	10.8393	1.103	10.8393	0.656
10.8636	2.113	10.8636	-0.196	10.8636	0.168	10.8636	0.239	10.8636	0.103	10.8636	0.089	10.8636	1.58	10.8636	0.884
10.8879	1.711	10.8879	0.01775	10.8879	0.115	10.8879	-0.057	10.8879	0.058	10.8879	0.03	10.8879	1.264	10.8879	0.411
10.9123	2.031	10.9123	-0.10848	10.9123	0.011	10.9123	-0.013	10.9123	0.126	10.9123	0.054	10.9123	1.35	10.9123	0.165
10.9366	1.567	10.9366	-0.05974	10.9366	-0.01	10.9366	0.073	10.9366	-0.033	10.9366	0.078	10.9366	1.199	10.9366	0.29
10.9609	2	10.9609	0.04101	10.9609	-0.083	10.9609	0.035	10.9609	0.056	10.9609	0.142	10.9609	0.708	10.9609	0.26
10.9852	2.278	10.9852	-0.20925	10.9852	-0.126	10.9852	0.017	10.9852	0.063	10.9852	0.207	10.9852	0.598	10.9852	-0.007
11.0095	2.144	11.0095	-0.09851	11.0095	0.098	11.0095	-0.031	11.0095	0.111	11.0095	0.582	11.0095	0.365	11.0095	-0.16
11.0339	2.196	11.0339	-0.04873	11.0339	0.096	11.0339	-0.069	11.0339	0.386	11.0339	0.791	11.0339	0.204	11.0339	0.016
11.0582	2.443	11.0582	-0.02099	11.0582	0.053	11.0582	-0.024	11.0582	-0.102	11.0582	0.898	11.0582	0.331	11.0582	-0.128
11.0825	2.711	11.0825	-0.13625	11.0825	-0.021	11.0825	0.072	11.0825	0.008	11.0825	0.901	11.0825	0.191	11.0825	0.079
11.1068	2.876	11.1068	0.0465	11.1068	0.112	11.1068	0.065	11.1068	-0.015	11.1068	0.296	11.1068	0.494	11.1068	0.039
11.1312	2.928	11.1312	0.02327	11.1312	-0.034	11.1312	0.007	11.1312	0.023	11.1312	0.062	11.1312	0.148	11.1312	-0.022
11.1555	3.66	11.1555	0.02101	11.1555	-0.036	11.1555	0.093	11.1555	-0.021	11.1555	0.086	11.1555	0.4	11.1555	0.071
11.1798	3.918	11.1798	-0.05424	11.1798	0.066	11.1798	0.169	11.1798	0.079	11.1798	0.245	11.1798	0.425	11.1798	0.031
11.2041	4.907	11.2041	0.1185	11.2041	0.085	11.2041	-0.085	11.2041	-0.222	11.2041	-0.071	11.2041	0.326	11.2041	0.001
11.2285	5.103	11.2285	-0.00773	11.2285	0.074	11.2285	-0.071	11.2285	0.147	11.2285	0.035	11.2285	0.3	11.2285	0.033
11.2528	5.062	11.2528	-0.08198	11.2528	-0.154	11.2528	-0.222	11.2528	0.103	11.2528	-0.033	11.2528	0.109	11.2528	-0.069
11.2771	5.34	11.2771	-0.06424	11.2771	-0.011	11.2771	0.078	11.2771	-0.188	11.2771	0.094	11.2771	0.165	11.2771	-0.305
11.3014	4.67	11.3014	-0.0465	11.3014	0.133	11.3014	0.11	11.3014	0.057	11.3014	-0.232	11.3014	0.087	11.3014	0.119
11.3257	4.268	11.3257	-0.11076	11.3257	-0.054	11.3257	-0.085	11.3257	0.035	11.3257	0.123	11.3257	0.041	11.3257	0.006
11.3501	3.588	11.3501	0.23702	11.3501	0.048	11.3501	0.081	11.3501	-0.132	11.3501	0.096	11.3501	-0.068	11.3501	0.008
11.3744	2.753	11.3744	0.30676	11.3744	-0.045	11.3744	-0.113	11.3744	-0.02	11.3744	0.13	11.3744	0.02	11.3744	-0.011
11.3987	2.701	11.3987	0.8195	11.3987	-0.077	11.3987	-0.071	11.3987	-0.074	11.3987	0.083	11.3987	-0.068	11.3987	-0.01
11.423	2.866	11.423	0.72425	11.423	0.047	11.423	0.126	11.423	0.009	11.423	-0.006	11.423	0.113	11.423	0.156
11.4474	2.113	11.4474	0.80402	11.4474	0.252	11.4474	-0.12	11.4474	0.194	11.4474	0.05	11.4474	0.026	11.4474	-0.285
11.4717	2.01	11.4717	0.18277	11.4717	0.365	11.4717	-0.078	11.4717	1.122	11.4717	0.085	11.4717	-0.124	11.4717	-0.067
11.496	2.278	11.496	0.32451	11.496	0.313	11.496	-0.004	11.496	0.926	11.496	-0.076	11.496	-0.021	11.496	-0.035
11.5203	1.969	11.5203	0.24025	11.5203	-0.068	11.5203	0.09	11.5203	0.597	11.5203	-0.133	11.5203	0.133	11.5203	0.008
11.5447	2.103	11.5447	0.25803	11.5447	-0.079	11.5447	0.422	11.5447	0.154	11.5447	-0.083	11.5447	-0.053	11.5447	-0.062
11.569	1.794	11.569	-0.02323	11.569	0.076	11.569	0.506	11.569	0.061	11.569	-0.032	11.569	-0.033	11.569	0.27
11.5933	1.711	11.5933	0.01551	11.5933	0.035	11.5933	1.724	11.5933	0.01	11.5933	-0.064	11.5933	0.059	11.5933	0.282
11.6176	1.845	11.6176	0.13725	11.6176	-0.037	11.6176	3.086	11.6176	0.145	11.6176	-0.023	11.6176	-0.106	11.6176	0.872
11.642	1.866	11.642	-0.06197	11.642	-0.016	11.642	3.851	11.642	0.136	11.642	0.007	11.642	0.111	11.642	0.565
11.6663	1.639	11.6663	-0.05423	11.6663	0.005	11.6663	2.75	11.6663	0.033	11.6663	-0.045	11.6663	0.203	11.6663	0.649
11.6906	1.68	11.6906	0.01551	11.6906	0.077	11.6906	1.03	11.6906	-0.079	11.6906	0.005	11.6906	0.121	11.6906	0.59
11.7149	1.722	11.7149	0.07526	11.7149	-0.046	11.7149	0.145	11.7149	0.005	11.7149	-0.036	11.7149	0.111	11.7149	0.633
11.7392	1.515	11.7392	0	11.7392	0.047	11.7392	0.189	11.7392	0.016	11.7392	-0.047	11.7392	0.286	11.7392	0.305
11.7636	1.557	11.7636	0.0356	11.7636	0.027	11.7636	0.047	11.7636	0.028	11.7636	-0.037	11.7636	0.194	11.7636	0.143
11.7879	1.454	11.7879	0.11122	11.7879	-0.013	11.7879	0.028	11.7879	0.081	11.7879	-0.058	11.7879	0.081	11.7879	0.3
11.8122	1.485	11.8122	0.08385	11.8122	-0.084	11.8122	0.247	11.8122	0.021	11.8122	-0.018	11.8122	0.04	11.8122	-0.027
11.8365	1.526	11.8365	0.05747	11.8365	0.02	11.8365	0.053	11.8365	0.033	11.8365	-0.1	11.8365	0.133	11.8365	0.099
11.8609	1.732	11.8609	-0.03193	11.8609	-0.01	11.8609	0.056	11.8609	0.076	11.8609	0.044	11.8609	0.453	11.8609	0.163
11.8852	1.691	11.8852	-0.1413	11.8852	-0.143	11.8852	0.017	11.8852	-0.087	11.8852	0.116	11.8852	0.382	11.8852	0.115
11.9095	1.412	11.9095	0.00732	11.9095	0.188	11.9095	-0.001	11.9095	0.1	11.9095	0.064	11.9095	0.548	11.9095	0.189
11.9338	1.773	11.9338	-0.04005	11.9338	0.983	11.9338	0.125	11.9338	-0.052	11.9338	0.043	11.9338	0.312	11.9338	-0.076
11.9582	1.443	11.9582	-0.11845	11.9582	1.222	11.9582	0.128	11.9582	0.012	11.9582	0.053	11.9582	0.457	11.9582	0.123
11.9825	1.722	11.9825	-0.04283	11.9825	0.563	11.9825	0.172	11.9825	0.035	11.9825	-0.163	11.9825	0.839	11.9825	0.095
12.0068	1.526	12.0068	-0.0392	12.0068	0.194	12.0068	0.175	12.0068	0.017	12.0068	-0.101	12.0068	0.995	12.0068	-0.149
12.0311	1.598	12.0311	0.13042	12.0311	0.134	12.0311	0.157	12.0311	0.071	12.0311	0.064	12.0311	1.172	12.0311	-0.089
12.0554	1.505	12.0554	0.26805	12.0554	0.115	12.0554	0.521	12.0554	0.074	12.0554	-0.286	12.0554	1.276	12.0554	0.024
12.0798	1.753	12.0798	0.07565	12.0798	0.116	12.0798	0.998	12.0798	-0.129	12.0798	-0.111	12.0798	1.927	12.0798	0.147
12.1041	1.423	12.1041	-0.08473	12.1041	0.118	12.1041	1.444	12.1041	0.07	12.1041	0.034	12.1041	1.114	12.1041	0.043
12.1284	2.113	12.1284	-0.0811	12.1284	0.11	12.1284	2.613	12.1284	0.021	12.1284	-0.028	12.1284	0.425	12.1284	0.526
12.1527	1.938	12.1527	-0.23147	12.1527	0.349	12.1527	2.492	12.1527	-0.089	12.1527	-0.017	12.1527	0.437	12.1527	1.216
12.1771	1.804	12.1771	-0.000875881	12.1771	0.176	12.1771	2.403	12.1771	0.028	12.1771	0.024	12.1771	0.253	12.1771	1.257
12.2014	1.732	12.2014	-0.18225	12.2014	-0.017	12.2014	1.581	12.2014	-0.082	12.2014	0.004	12.2014	0.266	12.2014	0.731
12.2257	1.474	12.2257	-0.08563	12.2257	0.026	12.2257	0.533	12.2257	-0.025	12.2257	-0.005	12.2257	0.443	12.2257	0.184
12.25	1.258	12.25	0	12.25	0.018	12.25	0.32	12.25	0.198	12.25	0.067	12.25	0.249	12.25	0.183
12.2744	1.588	12.2744	-0.0592	12.2744	-0.093	12.2744	-0.037	12.2744	0.142	12.2744	-0.015	12.2744	0.117	12.2744	-0.096
12.2987	1.464	12.2987	-0.00545	12.2987	-0.014	12.2987	-0.013	12.2987	0.107	12.2987	-0.138	12.2987	0.078	12.2987	0.059
12.323	1.402	12.323	-0.0337	12.323	0.014	12.323	0.156	12.323	0.083	12.323	0.018	12.323	0.07	12.323	-0.21
12.3473	1.433	12.3473	0.05105	12.3473	-0.113	12.3473	0.118	12.3473	0.213	12.3473	-0.012	12.3473	0.011	12.3473	0.171
12.3716	1.351	12.3716	0.2088	12.3716	0.089	12.3716	0.205	12.3716	0.199	12.3716	-0.084	12.3716	-0.059	12.3716	0.089
12.396	1.412	12.396	-0.1184	12.396	0.086	12.396	-0.111	12.396	0.186	12.396	-0.041	12.396	0.057	12.396	0.027
12.4203	1.32	12.4203	-0.10565	12.4203	0.176	12.4203	-0.066	12.4203	0.419	12.4203	-0.133	12.4203	0.4	12.4203	-0.076
12.4446	1.247	12.4446	-0.0519	12.4446	-0.085	12.4446	0.01	12.4446	0.653	12.4446	-0.082	12.4446	0.227	12.4446	-0.107
12.4689	1.299	12.4689	-0.17315	12.4689	-0.057	12.4689	-0.027	12.4689	0.599	12.4689	-0.063	12.4689	0.22	12.4689	0.243
12.4933	1.412	12.4933	-0.14035	12.4933	-0.05	12.4933	0.019	12.4933	0.183	12.4933	0.019	12.4933	-0.025	12.4933	0.367
12.5176	1.186	12.5176	-0.0656	12.5176	-0.063	12.5176	0.126	12.5176	0.046	12.5176	0.091	12.5176	0.092	12.5176	0.388
12.5419	1.031	12.5419	-0.17685	12.5419	-0.086	12.5419	0.12	12.5419	-0.101	12.5419	-0.075	12.5419	0.157	12.5419	0.429
12.5662	1.402	12.5662	-0.0401	12.5662	0.086	12.5662	0.032	12.5662	0.113	12.5662	0.09	12.5662	0.088	12.5662	0.399
12.5906	1.268	12.5906	0.0657	12.5906	0.022	12.5906	-0.098	12.5906	0.038	12.5906	0.059	12.5906	-0.022	12.5906	1.142
12.6149	1.196	12.6149	-0.06555	12.6149	0.04	12.6149	-0.026	12.6149	0.025	12.6149	-0.158	12.6149	0.033	12.6149	1.008
12.6392	1.371	12.6392	-0.0428	12.6392	-0.066	12.6392	-0.067	12.6392	0.033	12.6392	0.048	12.6392	-0.139	12.6392	1.194
12.6635	1.062	12.6635	0.01095	12.6635	-0.006	12.6635	0.109	12.6635	-0.082	12.6635	-0.035	12.6635	-0.029	12.6635	0.679
12.6878	1.33	12.6878	0.0857	12.6878	0.177	12.6878	-0.159	12.6878	-0.025	12.6878	-0.097	12.6878	0.318	12.6878	0.979
12.7122	1.247	12.7122	0.1395	12.7122	0.113	12.7122	0.088	12.7122	-0.05	12.7122	0.191	12.7122	0.16	12.7122	0.784
12.7365	1.412	12.7365	-0.03275	12.7365	-0.064	12.7365	0.109	12.7365	0.131	12.7365	0.263	12.7365	0.239	12.7365	0.99
12.7608	1.165	12.7608	0	12.7608	-0.066	12.7608	-0.024	12.7608	0.106	12.7608	0.243	12.7608	0.123	12.7608	0.661
12.7851	1.402	12.7851	-0.15455	12.7851	-0.027	12.7851	-0.003	12.7851	0.163	12.7851	0.222	12.7851	0.213	12.7851	0.301
12.8095	1.278	12.8095	-0.0521	12.8095	0.003	12.8095	0.121	12.8095	0.149	12.8095	0.026	12.8095	0.292	12.8095	0.241
12.8338	1.144	12.8338	-0.09365	12.8338	0.166	12.8338	-0.064	12.8338	-0.02	12.8338	0.191	12.8338	0.238	12.8338	0.128
12.8581	1.351	12.8581	0.0808	12.8581	0.185	12.8581	0.091	12.8581	0.007	12.8581	0.202	12.8581	0.152	12.8581	-0.025
12.8824	1.093	12.8824	0.03925	12.8824	-0.074	12.8824	-0.042	12.8824	-0.039	12.8824	0.284	12.8824	0.212	12.8824	0.089
12.9068	1.33	12.9068	0.0487	12.9068	0.182	12.9068	-0.052	12.9068	0.081	12.9068	0.274	12.9068	0.395	12.9068	0.049
12.9311	1.216	12.9311	-0.06585	12.9311	0.222	12.9311	0.104	12.9311	-0.056	12.9311	0.285	12.9311	0.165	12.9311	0.071
12.9554	1.402	12.9554	-0.0554	12.9554	0.179	12.9554	0.156	12.9554	-0.008	12.9554	0.316	12.9554	0.163	12.9554	-0.196
12.9797	1.237	12.9797	-0.00495	12.9797	0.333	12.9797	0.065	12.9797	-0.032	12.9797	0.574	12.9797	0.181	12.9797	-0.062
13.004	1.299	13.004	0.0465	13.004	0.167	13.004	0.035	13.004	-0.025	13.004	0.802	13.004	0.251	13.004	0.03
13.0284	1.134	13.0284	-0.07805	13.0284	0.444	13.0284	0.139	13.0284	0.044	13.0284	0.885	13.0284	0.167	13.0284	0.185
13.0527	1.155	13.0527	-0.0986	13.0527	0.67	13.0527	0.12	13.0527	0.773	13.0527	1.267	13.0527	0.34	13.0527	0.071
13.077	1.247	13.077	0.03485	13.077	1.205	13.077	-0.034	13.077	1.625	13.077	2.443	13.077	0.42	13.077	0.009
13.1013	1.021	13.1013	0.0033	13.1013	1.988	13.1013	0.143	13.1013	2.685	13.1013	7.918	13.1013	0.748	13.1013	0.143
13.1257	1.103	13.1257	0.21875	13.1257	2.853	13.1257	0.093	13.1257	3.465	13.1257	14.29	13.1257	3.159	13.1257	0.401
13.15	0.99	13.15	0.1152	13.15	3.296	13.15	0.393	13.15	4.287	13.15	19.125	13.15	5.322	13.15	1.277
13.1743	1.196	13.1743	-0.06035	13.1743	4.532	13.1743	0.488	13.1743	4.254	13.1743	17.951	13.1743	6.826	13.1743	2.463
13.1986	1.021	13.1986	0.1041	13.1986	5.687	13.1986	1.252	13.1986	4.241	13.1986	12.818	13.1986	9.164	13.1986	5.886
13.223	1.175	13.223	0.04155	13.223	7.253	13.223	2.347	13.223	2.641	13.223	8.077	13.223	14.39	13.223	7.185
13.2473	0.866	13.2473	0	13.2473	10.15	13.2473	2.451	13.2473	1.371	13.2473	4.727	13.2473	17.285	13.2473	5.66
13.2716	0.887	13.2716	0.08515	13.2716	12.954	13.2716	1.928	13.2716	0.967	13.2716	2.852	13.2716	14.769	13.2716	2.577
13.2959	1.268	13.2959	0.0373	13.2959	15.696	13.2959	1.486	13.2959	0.625	13.2959	1.472	13.2959	9.489	13.2959	1.032
13.3202	0.804	13.3202	0.21645	13.3202	17.82	13.3202	0.983	13.3202	0.376	13.3202	1.009	13.3202	4.344	13.3202	0.362
13.3446	1.052	13.3446	0.02357	13.3446	19.542	13.3446	0.841	13.3446	0.127	13.3446	0.752	13.3446	2.126	13.3446	0.136
13.3689	0.825	13.3689	0.14072	13.3689	16.841	13.3689	0.637	13.3689	0.001	13.3689	0.558	13.3689	1.383	13.3689	0.26
13.3932	0.876	13.3932	0.16487	13.3932	15.429	13.3932	0.453	13.3932	0.258	13.3932	0.394	13.3932	0.928	13.3932	0.013
13.4175	0.959	13.4175	0.23001	13.4175	11.46	13.4175	0.249	13.4175	0.132	13.4175	0.457	13.4175	1.165	13.4175	0.179
13.4419	0.938	13.4419	0.24413	13.4419	6.254	13.4419	0.396	13.4419	0.245	13.4419	0.459	13.4419	0.958	13.4419	0.108
13.4662	1.021	13.4662	0.11328	13.4662	2.78	13.4662	0.347	13.4662	0.058	13.4662	0.399	13.4662	1.205	13.4662	-0.129
13.4905	1.113	13.4905	0.24043	13.4905	1.142	13.4905	0.37	13.4905	0.067	13.4905	1.039	13.4905	1.05	13.4905	-0.097
13.5148	0.876	13.5148	0.05858	13.5148	0.576	13.5148	0.383	13.5148	-0.057	13.5148	1.381	13.5148	1.348	13.5148	-0.055
13.5392	1.258	13.5392	-0.1343	13.5392	0.607	13.5392	0.2	13.5392	-0.027	13.5392	1.207	13.5392	1.338	13.5392	-0.045
13.5635	0.948	13.5635	0.06485	13.5635	0.412	13.5635	0.233	13.5635	0.024	13.5635	0.57	13.5635	1.451	13.5635	0.193
13.5878	0.897	13.5878	0.007	13.5878	0.485	13.5878	0.246	13.5878	0.157	13.5878	0.067	13.5878	1.647	13.5878	0.214
13.6121	1.124	13.6121	-0.07185	13.6121	0.229	13.6121	0.187	13.6121	0.229	13.6121	-0.055	13.6121	1.255	13.6121	-0.043
13.6364	0.845	13.6364	-0.0067	13.6364	0.354	13.6364	0.015	13.6364	0.682	13.6364	0.008	13.6364	1.224	13.6364	0.092
13.6608	0.928	13.6608	-0.06558	13.6608	0.118	13.6608	0.028	13.6608	1.074	13.6608	-0.021	13.6608	1.585	13.6608	0.113
13.6851	0.732	13.6851	0.06157	13.6851	0.14	13.6851	-0.113	13.6851	1.641	13.6851	0.27	13.6851	1.575	13.6851	0.155
13.7094	0.907	13.7094	-0.08928	13.7094	0.244	13.7094	-0.023	13.7094	1.723	13.7094	0.21	13.7094	1.967	13.7094	0.156
13.7337	0.856	13.7337	-0.18913	13.7337	-0.115	13.7337	-0.077	13.7337	2.064	13.7337	0.48	13.7337	2.05	13.7337	0.424
13.7581	0.907	13.7581	0.05199	13.7581	0.082	13.7581	0.075	13.7581	1.641	13.7581	0.307	13.7581	2.875	13.7581	0.518
13.7824	0.835	13.7824	0.06513	13.7824	0.063	13.7824	0.186	13.7824	0.889	13.7824	0.464	13.7824	2.144	13.7824	0.581
13.8067	1.124	13.8067	-0.11672	13.8067	0.23	13.8067	0.019	13.8067	0.426	13.8067	0.229	13.8067	1.474	13.8067	0.623
13.831	1.206	13.831	0.43343	13.831	-0.067	13.831	0.007	13.831	0.148	13.831	0.314	13.831	1.506	13.831	0.521
13.8554	1.134	13.8554	0.92055	13.8554	-0.024	13.8554	0.108	13.8554	-0.027	13.8554	0.11	13.8554	1.064	13.8554	0.337
13.8797	1.072	13.8797	2.2237	13.8797	-0.105	13.8797	0.157	13.8797	-0.026	13.8797	-0.114	13.8797	0.725	13.8797	0.379
13.904	1.041	13.904	2.52585	13.904	0.135	13.904	0.413	13.904	-0.045	13.904	0.115	13.904	0.808	13.904	0.308
13.9283	0.897	13.9283	2.632	13.9283	0.106	13.9283	0.143	13.9283	-0.034	13.9283	-0.119	13.9283	0.727	13.9283	0.547
13.9526	0.959	13.9526	1.56415	13.9526	-0.047	13.9526	0.244	13.9526	-0.002	13.9526	0.11	13.9526	0.738	13.9526	0.95
13.977	1.072	13.977	1.05127	13.977	0.203	13.977	0.676	13.977	-0.032	13.977	0.236	13.977	0.678	13.977	1.735
14.0013	0.928	14.0013	2.00342	14.0013	0.35	14.0013	1.086	14.0013	0.001	14.0013	0.177	14.0013	0.329	14.0013	1.861
14.0256	0.928	14.0256	2.62557	14.0256	0.538	14.0256	1.404	14.0256	-0.008	14.0256	0.376	14.0256	0.268	14.0256	2.12
14.0499	0.907	14.0499	1.51572	14.0499	0.912	14.0499	1.64	14.0499	0.045	14.0499	0.554	14.0499	0.404	14.0499	1.462
14.0743	0.845	14.0743	0.52984	14.0743	1.409	14.0743	1.577	14.0743	0.439	14.0743	0.443	14.0743	0.673	14.0743	1.257
14.0986	0.907	14.0986	0.01699	14.0986	1.773	14.0986	1.658	14.0986	0.441	14.0986	0.199	14.0986	0.954	14.0986	3.063
14.1229	0.887	14.1229	-0.20587	14.1229	2.415	14.1229	2.141	14.1229	0.649	14.1229	0.305	14.1229	2.141	14.1229	5.477
14.1472	0.856	14.1472	-0.27472	14.1472	3.273	14.1472	2.212	14.1472	1.207	14.1472	0.122	14.1472	2.72	14.1472	8.809
14.1716	0.845	14.1716	-0.1066	14.1716	4.4	14.1716	2.479	14.1716	1.952	14.1716	0.414	14.1716	2.774	14.1716	8.44
14.1959	0.887	14.1959	-0.04145	14.1959	5.723	14.1959	3.189	14.1959	2.377	14.1959	0.551	14.1959	2.229	14.1959	5.875
14.2202	0.835	14.2202	0.0657	14.2202	5.437	14.2202	3.157	14.2202	2.421	14.2202	0.461	14.2202	1.438	14.2202	3.805
14.2445	0.835	14.2445	-0.02415	14.2445	4.358	14.2445	4.187	14.2445	2.165	14.2445	0.557	14.2445	0.667	14.2445	3.189
14.2688	1.041	14.2688	0	14.2688	3.341	14.2688	5.062	14.2688	2.199	14.2688	0.416	14.2688	0.391	14.2688	2.139
14.2932	0.897	14.2932	0.09472	14.2932	2.107	14.2932	4.927	14.2932	1.779	14.2932	0.42	14.2932	0.228	14.2932	1.162
14.3175	0.742	14.3175	-0.05857	14.3175	1.193	14.3175	3.741	14.3175	1.586	14.3175	0.289	14.3175	0.365	14.3175	0.525
14.3418	0.918	14.3418	0.05714	14.3418	0.661	14.3418	2.122	14.3418	1.95	14.3418	0.086	14.3418	0.017	14.3418	0.28
14.3661	1.144	14.3661	0.16186	14.3661	0.345	14.3661	1.245	14.3661	2.149	14.3661	-0.003	14.3661	0.288	14.3661	-0.006
14.3905	0.814	14.3905	0.33858	14.3905	0.431	14.3905	0.605	14.3905	2.668	14.3905	-0.041	14.3905	-0.029	14.3905	0.492
14.4148	1.093	14.4148	0.19629	14.4148	0.61	14.4148	0.14	14.4148	2.692	14.4148	-0.223	14.4148	0.211	14.4148	0.123
14.4391	1.165	14.4391	0.414	14.4391	0.717	14.4391	0.295	14.4391	2.489	14.4391	-0.048	14.4391	0.193	14.4391	0.26
14.4634	0.907	14.4634	0.32371	14.4634	0.392	14.4634	0.305	14.4634	1.74	14.4634	-0.048	14.4634	0.135	14.4634	-0.098
14.4878	1.072	14.4878	0.29443	14.4878	0.241	14.4878	0.201	14.4878	1.022	14.4878	-0.08	14.4878	0.076	14.4878	-0.013
14.5121	1.072	14.5121	0.17215	14.5121	-0.012	14.5121	0.026	14.5121	0.809	14.5121	-0.07	14.5121	0.306	14.5121	0.021
14.5364	1.371	14.5364	0.89586	14.5364	0.054	14.5364	0.263	14.5364	0.277	14.5364	-0.029	14.5364	0.021	14.5364	-0.028
14.5607	1.289	14.5607	2.25757	14.5607	0.079	14.5607	-0.006	14.5607	0.456	14.5607	-0.07	14.5607	0.065	14.5607	0.161
14.585	1.443	14.585	2.97129	14.585	0.001	14.585	0.036	14.585	0.162	14.585	-0.05	14.585	-0.014	14.585	0.081
14.6094	1.423	14.6094	3.478	14.6094	0.005	14.6094	-0.067	14.6094	-0.061	14.6094	-0.081	14.6094	0.124	14.6094	0.105
14.6337	1.351	14.6337	2.53072	14.6337	-0.072	14.6337	-0.088	14.6337	-0.211	14.6337	0.043	14.6337	0.159	14.6337	0.139
14.658	1.392	14.658	1.11043	14.658	-0.006	14.658	0.108	14.658	0.072	14.658	-0.143	14.658	-0.023	14.658	0.07
14.6823	1.804	14.6823	0.22514	14.6823	-0.063	14.6823	-0.087	14.6823	-0.037	14.6823	-0.122	14.6823	0.074	14.6823	0.053
14.7067	1.691	14.7067	-0.21614	14.7067	-0.079	14.7067	-0.099	14.7067	-0.145	14.7067	-0.051	14.7067	-0.149	14.7067	0.17
14.731	1.711	14.731	-0.16343	14.731	-0.049	14.731	0.157	14.731	0.087	14.731	-0.092	14.731	-0.069	14.731	-0.013
14.7553	2.196	14.7553	-0.10971	14.7553	0.042	14.7553	0.115	14.7553	0.02	14.7553	-0.031	14.7553	0.094	14.7553	0.156
14.7796	2.082	14.7796	-0.087	14.7796	-0.053	14.7796	-0.052	14.7796	-0.006	14.7796	0.03	14.7796	0.164	14.7796	0.067
14.804	1.99	14.804	-0.13728	14.804	-0.075	14.804	-0.084	14.804	-0.063	14.804	-0.001	14.804	0.121	14.804	-0.012
14.8283	2.33	14.8283	0.10143	14.8283	0.305	14.8283	-0.075	14.8283	-0.047	14.8283	-0.094	14.8283	0.109	14.8283	-0.091
14.8526	2.732	14.8526	-0.15486	14.8526	0.118	14.8526	0.027	14.8526	-0.072	14.8526	0.05	14.8526	0.479	14.8526	-0.032
14.8769	2.495	14.8769	0.37286	14.8769	0.282	14.8769	0.108	14.8769	0.038	14.8769	-0.054	14.8769	0.354	14.8769	-0.036
14.9013	2.722	14.9013	1.03458	14.9013	0.291	14.9013	0.168	14.9013	0.035	14.9013	0.121	14.9013	0.259	14.9013	0.178
14.9256	2.969	14.9256	1.65529	14.9256	0.074	14.9256	0.116	14.9256	-0.02	14.9256	0.028	14.9256	0.041	14.9256	0.041
14.9499	2.639	14.9499	1.698	14.9499	0.248	14.9499	0.125	14.9499	-0.053	14.9499	-0.23	14.9499	0.215	14.9499	0.079
14.9742	3.175	14.9742	1.87471	14.9742	0.144	14.9742	0.103	14.9742	0.088	14.9742	0.007	14.9742	0.369	14.9742	0.344
14.9985	2.546	14.9985	1.77343	14.9985	0.535	14.9985	0.081	14.9985	0.343	14.9985	0.038	14.9985	-0.003	14.9985	0.124
15.0229	2.567	15.0229	1.62015	15.0229	1.328	15.0229	-0.043	15.0229	0.289	15.0229	-0.075	15.0229	0.222	15.0229	0.338
15.0472	2.443	15.0472	1.06586	15.0472	1.678	15.0472	-0.034	15.0472	0.143	15.0472	0.069	15.0472	0.356	15.0472	0.222
15.0715	2.309	15.0715	0.65457	15.0715	1.935	15.0715	0.007	15.0715	0.233	15.0715	0.069	15.0715	0.365	15.0715	0.405
15.0958	2.103	15.0958	0.31629	15.0958	2.594	15.0958	0.315	15.0958	0.489	15.0958	0.482	15.0958	0.323	15.0958	0.577
15.1202	1.969	15.1202	-0.074	15.1202	3.295	15.1202	1.149	15.1202	0.27	15.1202	0.657	15.1202	0.415	15.1202	0.472
15.1445	1.948	15.1445	-0.12328	15.1445	2.635	15.1445	1.664	15.1445	0.474	15.1445	1.101	15.1445	0.322	15.1445	0.129
15.1688	1.68	15.1688	-0.10157	15.1688	2.418	15.1688	2.385	15.1688	0.679	15.1688	0.885	15.1688	0.321	15.1688	0.302
15.1931	1.887	15.1931	0.05514	15.1931	1.675	15.1931	2.395	15.1931	0.966	15.1931	0.679	15.1931	0.146	15.1931	0.258
15.2175	1.763	15.2175	-0.36614	15.2175	0.964	15.2175	3.25	15.2175	0.861	15.2175	0.813	15.2175	0.414	15.2175	0.348
15.2418	1.876	15.2418	-0.15743	15.2418	0.861	15.2418	3.827	15.2418	1.818	15.2418	1.278	15.2418	0.867	15.2418	0.109
15.2661	1.639	15.2661	-0.11471	15.2661	0.397	15.2661	3.652	15.2661	2.765	15.2661	2.618	15.2661	0.609	15.2661	-0.017
15.2904	1.485	15.2904	0.124	15.2904	0.449	15.2904	3.064	15.2904	4.393	15.2904	2.681	15.2904	0.619	15.2904	0.094
15.3147	1.093	15.3147	0.23871	15.3147	0.171	15.3147	2.177	15.3147	5.835	15.3147	2.682	15.3147	0.795	15.3147	0.257
15.3391	1.113	15.3391	0.31243	15.3391	0.419	15.3391	1.672	15.3391	6.267	15.3391	3.342	15.3391	0.64	15.3391	0.358
15.3634	1.124	15.3634	-0.04586	15.3634	0.151	15.3634	0.92	15.3634	6.287	15.3634	3.559	15.3634	0.393	15.3634	0.48
15.3877	1.175	15.3877	-0.11714	15.3877	0.131	15.3877	0.476	15.3877	6.214	15.3877	4.096	15.3877	0.352	15.3877	0.695
15.412	1	15.412	-0.29043	15.412	0.111	15.412	0.373	15.412	6.12	15.412	2.86	15.412	0.538	15.412	1.136
15.4364	1	15.4364	-0.27871	15.4364	0.122	15.4364	0.477	15.4364	5.079	15.4364	1.675	15.4364	0.497	15.4364	1.041
15.4607	0.969	15.4607	-0.163	15.4607	0.236	15.4607	0.065	15.4607	3.408	15.4607	1.429	15.4607	0.704	15.4607	1.205
15.485	1.041	15.485	-0.04829	15.485	0.175	15.485	0.199	15.485	2.088	15.485	0.78	15.485	0.705	15.485	0.667
15.5093	0.845	15.5093	0.23243	15.5093	0.382	15.5093	0.086	15.5093	1.191	15.5093	0.122	15.5093	0.602	15.5093	0.305
15.5337	0.897	15.5337	0.20315	15.5337	0.219	15.5337	0.282	15.5337	1.078	15.5337	0.257	15.5337	0.696	15.5337	0.169
15.558	0.938	15.558	0.10186	15.558	0.323	15.558	0.077	15.558	0.624	15.558	-0.041	15.558	0.594	15.558	0.271
15.5823	1.01	15.5823	0.12357	15.5823	0.138	15.5823	-0.067	15.5823	0.325	15.5823	-0.029	15.5823	0.152	15.5823	0.218
15.6066	0.825	15.6066	0.01229	15.6066	0.057	15.6066	0.171	15.6066	0.243	15.6066	0.003	15.6066	-0.167	15.6066	0.227
15.6309	0.742	15.6309	0.117	15.6309	0.069	15.6309	-0.035	15.6309	0.192	15.6309	0.097	15.6309	0.164	15.6309	0.205
15.6553	0.887	15.6553	0.37672	15.6553	0.009	15.6553	-0.013	15.6553	0.017	15.6553	-0.025	15.6553	0.042	15.6553	0.203
15.6796	0.907	15.6796	1.27543	15.6796	-0.062	15.6796	-0.084	15.6796	0.028	15.6796	0.058	15.6796	0.167	15.6796	0.295
15.7039	0.66	15.7039	1.86414	15.7039	0.136	15.7039	0.007	15.7039	0.028	15.7039	-0.053	15.7039	0.065	15.7039	0.119
15.7282	0.99	15.7282	1.69086	15.7282	0.519	15.7282	-0.004	15.7282	-0.125	15.7282	-0.031	15.7282	0.129	15.7282	0.18
15.7526	0.938	15.7526	1.07357	15.7526	0.737	15.7526	-0.056	15.7526	0.04	15.7526	0.135	15.7526	0.089	15.7526	-0.151
15.7769	0.845	15.7769	0.32329	15.7769	0.811	15.7769	0.056	15.7769	-0.062	15.7769	0.003	15.7769	0.019	15.7769	0.013
15.8012	0.742	15.8012	0.191	15.8012	0.411	15.8012	0.066	15.8012	-0.009	15.8012	0.036	15.8012	0.113	15.8012	0.187
15.8255	0.701	15.8255	-0.13729	15.8255	0.217	15.8255	0.323	15.8255	0.003	15.8255	-0.148	15.8255	0.126	15.8255	0.444
15.8499	0.711	15.8499	-0.24957	15.8499	0.065	15.8499	0.992	15.8499	0.148	15.8499	-0.033	15.8499	0.086	15.8499	0.588
15.8742	0.773	15.8742	-0.09286	15.8742	-0.16	15.8742	1.888	15.8742	0.067	15.8742	-0.103	15.8742	-0.076	15.8742	0.649
15.8985	0.577	15.8985	-0.28714	15.8985	-0.055	15.8985	2.589	15.8985	0.038	15.8985	-0.112	15.8985	-0.012	15.8985	0.679
15.9228	0.701	15.9228	-0.25443	15.9228	-0.042	15.9228	1.65	15.9228	0.473	15.9228	0.014	15.9228	-0.103	15.9228	0.555
15.9471	0.546	15.9471	-0.19072	15.9471	0.011	15.9471	1.423	15.9471	0.289	15.9471	-0.046	15.9471	0.014	15.9471	0.606
15.9715	0.639	15.9715	-0.076	15.9715	0.013	15.9715	0.33	15.9715	0.332	15.9715	-0.044	15.9715	0.039	15.9715	0.389
15.9958	0.773	15.9958	-0.20829	15.9958	-0.139	15.9958	0.041	15.9958	0.108	15.9958	0.041	15.9958	-0.039	15.9958	0.214
16.0201	0.691	16.0201	-0.20657	16.0201	-0.009	16.0201	0.154	16.0201	0.141	16.0201	-0.039	16.0201	0.068	16.0201	0.121
16.0444	0.845	16.0444	-0.25586	16.0444	-0.043	16.0444	0.113	16.0444	-0.053	16.0444	-0.099	16.0444	0.011	16.0444	0.203
16.0688	0.763	16.0688	0.06486	16.0688	0.077	16.0688	-0.031	16.0688	0.001	16.0688	-0.117	16.0688	-0.129	16.0688	0.409
16.0931	0.629	16.0931	-0.17043	16.0931	0.332	16.0931	-0.227	16.0931	-0.007	16.0931	-0.033	16.0931	0.061	16.0931	0.161
16.1174	0.722	16.1174	-0.10671	16.1174	0.442	16.1174	0.051	16.1174	-0.004	16.1174	0.052	16.1174	0.003	16.1174	0.182
16.1417	0.825	16.1417	-0.187	16.1417	0.5	16.1417	-0.093	16.1417	0.019	16.1417	-0.049	16.1417	0.328	16.1417	0.295
16.1661	1.01	16.1661	-0.20628	16.1661	0.549	16.1661	-0.02	16.1661	-0.05	16.1661	0.005	16.1661	0.136	16.1661	0.409
16.1904	0.773	16.1904	-0.23557	16.1904	0.226	16.1904	0.207	16.1904	-0.037	16.1904	0.049	16.1904	0.255	16.1904	0.326
16.2147	0.804	16.2147	-0.20286	16.2147	0.337	16.2147	0.321	16.2147	0.059	16.2147	-0.032	16.2147	0.445	16.2147	0.502
16.239	0.649	16.239	-0.23214	16.239	0.416	16.239	0.754	16.239	0.268	16.239	0.033	16.239	0.306	16.239	0.832
16.2633	0.742	16.2633	-0.02443	16.2633	0.29	16.2633	0.971	16.2633	0.21	16.2633	0.159	16.2633	0.383	16.2633	0.76
16.2877	0.825	16.2877	-0.03271	16.2877	0.246	16.2877	1.013	16.2877	0.1	16.2877	0.028	16.2877	0.595	16.2877	0.699
16.312	0.67	16.312	0	16.312	0.573	16.312	0.818	16.312	0.207	16.312	0.02	16.312	0.548	16.312	1.029
16.3363	0.784	16.3363	-0.11754	16.3363	0.313	16.3363	0.457	16.3363	0.076	16.3363	-0.153	16.3363	0.296	16.3363	1.102
16.3606	0.773	16.3606	0.14692	16.3606	0.259	16.3606	0.365	16.3606	-0.002	16.3606	-0.102	16.3606	0.322	16.3606	0.989
16.385	0.773	16.385	0.0504	16.385	0.216	16.385	0.119	16.385	-0.071	16.385	-0.051	16.385	0.616	16.385	0.577
16.4093	0.66	16.4093	0.32486	16.4093	0.08	16.4093	0.14	16.4093	-0.102	16.4093	0.103	16.4093	0.632	16.4093	0.259
16.4336	0.794	16.4336	-0.08068	16.4336	0.284	16.4336	0.018	16.4336	0.145	16.4336	0.401	16.4336	0.597	16.4336	0.496
16.4579	0.691	16.4579	0.23478	16.4579	0.354	16.4579	0.039	16.4579	0.465	16.4579	0.297	16.4579	0.706	16.4579	0.446
16.4823	0.794	16.4823	0.15827	16.4823	0.104	16.4823	0.01	16.4823	0.805	16.4823	0.276	16.4823	0.835	16.4823	0.282
16.5066	0.784	16.5066	0.07272	16.5066	0.072	16.5066	-0.02	16.5066	0.929	16.5066	0.183	16.5066	1.047	16.5066	0.386
16.5309	0.866	16.5309	0.28518	16.5309	0.049	16.5309	0.115	16.5309	1.238	16.5309	0.121	16.5309	1.167	16.5309	0.397
16.5552	0.804	16.5552	0.30164	16.5552	0.13	16.5552	0.055	16.5552	1.393	16.5552	-0.014	16.5552	1.4	16.5552	0.388
16.5795	0.804	16.5795	0.5351	16.5795	0.252	16.5795	0.118	16.5795	1.373	16.5795	0.038	16.5795	1.138	16.5795	0.379
16.6039	0.979	16.6039	0.38659	16.6039	0.199	16.6039	0.367	16.6039	1.672	16.6039	-0.097	16.6039	0.99	16.6039	0.401
16.6282	0.753	16.6282	0.35205	16.6282	0.548	16.6282	0.286	16.6282	1.529	16.6282	0.048	16.6282	0.635	16.6282	0.515
16.6525	0.732	16.6525	0.7505	16.6525	0.567	16.6525	1.061	16.6525	1.128	16.6525	0.109	16.6525	0.766	16.6525	0.321
16.6768	0.773	16.6768	0.94196	16.6768	0.545	16.6768	1.547	16.6768	0.726	16.6768	0.078	16.6768	0.628	16.6768	0.477
16.7012	0.784	16.7012	1.26845	16.7012	0.658	16.7012	1.631	16.7012	0.748	16.7012	0.119	16.7012	0.872	16.7012	1.138
16.7255	0.608	16.7255	2.05791	16.7255	0.729	16.7255	2.18	16.7255	1.048	16.7255	0.326	16.7255	1.301	16.7255	0.624
16.7498	0.742	16.7498	5.14737	16.7498	0.635	16.7498	3.315	16.7498	0.977	16.7498	0.315	16.7498	2.411	16.7498	1.059
16.7741	0.856	16.7741	9.97883	16.7741	1.232	16.7741	4.451	16.7741	0.886	16.7741	0.171	16.7741	2.923	16.7741	1.596
16.7985	0.722	16.7985	13.4793	16.7985	2.509	16.7985	5.783	16.7985	0.485	16.7985	0.006	16.7985	2.508	16.7985	1.433
16.8228	0.763	16.8228	13.4858	16.8228	1.704	16.8228	6.383	16.8228	0.518	16.8228	0.337	16.8228	2.02	16.8228	1.322
16.8471	0.773	16.8471	11.0602	16.8471	1.456	16.8471	4.581	16.8471	0.262	16.8471	0.306	16.8471	0.635	16.8471	0.354
16.8714	0.948	16.8714	8.14869	16.8714	1.012	16.8714	3.11	16.8714	-0.015	16.8714	0.317	16.8714	0.756	16.8714	0.614
16.8957	0.773	16.8957	4.13415	16.8957	0.352	16.8957	1.019	16.8957	0.09	16.8957	0.276	16.8957	0.485	16.8957	0.781
16.9201	0.804	16.9201	2.25463	16.9201	0.063	16.9201	0.3	16.9201	0.133	16.9201	0.462	16.9201	0.41	16.9201	0.907
16.9444	0.876	16.9444	0.73509	16.9444	-0.04	16.9444	0.24	16.9444	0.115	16.9444	0.483	16.9444	0.284	16.9444	1.187
16.9687	0.938	16.9687	0.41155	16.9687	-0.082	16.9687	-0.18	16.9687	0.076	16.9687	0.411	16.9687	0.065	16.9687	1.973
16.993	0.814	16.993	0.23301	16.993	0.021	16.993	0.091	16.993	0.223	16.993	0.288	16.993	0.165	16.993	1.81
17.0174	0.845	17.0174	0.2395	17.0174	-0.041	17.0174	0.289	17.0174	0.153	17.0174	0.299	17.0174	0.214	17.0174	1.318
17.0417	0.938	17.0417	0.31795	17.0417	0.021	17.0417	-0.007	17.0417	0.187	17.0417	0.021	17.0417	0.315	17.0417	0.753
17.066	0.918	17.066	0.32441	17.066	0.361	17.066	0.109	17.066	0.035	17.066	0.239	17.066	0.271	17.066	0.549
17.0903	0.711	17.0903	0.23787	17.0903	0.34	17.0903	-0.032	17.0903	0.007	17.0903	0.023	17.0903	-0.112	17.0903	0.799
17.1147	0.753	17.1147	0.28536	17.1147	0.619	17.1147	0.084	17.1147	0.061	17.1147	0.076	17.1147	0.102	17.1147	0.575
17.139	1.041	17.139	0.19882	17.139	0.98	17.139	0.077	17.139	0.188	17.139	-0.027	17.139	0.152	17.139	0.371
17.1633	0.742	17.1633	0.17428	17.1633	1.197	17.1633	0.008	17.1633	0.036	17.1633	0.057	17.1633	0.005	17.1633	0.405
17.1876	0.814	17.1876	0.19173	17.1876	0.815	17.1876	0.011	17.1876	-0.002	17.1876	-0.086	17.1876	0.138	17.1876	0.449
17.2119	0.856	17.2119	0.22919	17.2119	0.589	17.2119	0.024	17.2119	-0.05	17.2119	0.007	17.2119	0.321	17.2119	0.482
17.2363	0.814	17.2363	0.08068	17.2363	0.105	17.2363	-0.024	17.2363	-0.067	17.2363	0.07	17.2363	0.186	17.2363	0.496
17.2606	0.722	17.2606	0.20014	17.2606	-0.039	17.2606	-0.093	17.2606	-0.036	17.2606	0.02	17.2606	0.153	17.2606	0.406
17.2849	0.845	17.2849	0.1346	17.2849	0.127	17.2849	0.032	17.2849	0.118	17.2849	-0.072	17.2849	0.379	17.2849	0.677
17.3092	0.711	17.3092	0.17206	17.3092	0.015	17.3092	-0.028	17.3092	0.499	17.3092	-0.101	17.3092	0.326	17.3092	1.463
17.3336	0.763	17.3336	0.05454	17.3336	0.129	17.3336	0.035	17.3336	0.623	17.3336	0.024	17.3336	0.304	17.3336	1.26
17.3579	0.928	17.3579	0	17.3579	0.058	17.3579	0.067	17.3579	0.53	17.3579	-0.129	17.3579	0.065	17.3579	1.294
17.3822	1.134	17.3822	0.01014	17.3822	0.182	17.3822	0.038	17.3822	0.211	17.3822	0.006	17.3822	0.136	17.3822	0.854
17.4065	1.052	17.4065	0.000283559	17.4065	0.029	17.4065	0.112	17.4065	0.077	17.4065	-0.116	17.4065	0.372	17.4065	0.672
17.4309	1.216	17.4309	0.23743	17.4309	0.195	17.4309	0.278	17.4309	0.068	17.4309	-0.086	17.4309	0.351	17.4309	0.5
17.4552	1.052	17.4552	0.23757	17.4552	0.557	17.4552	0.62	17.4552	0.058	17.4552	-0.016	17.4552	0.175	17.4552	0.349
17.4795	0.99	17.4795	0.22671	17.4795	1.146	17.4795	0.704	17.4795	0.12	17.4795	0.024	17.4795	0.184	17.4795	0.373
17.5038	0.856	17.5038	0.19685	17.5038	2.014	17.5038	0.696	17.5038	-0.003	17.5038	-0.028	17.5038	0.338	17.5038	0.191
17.5281	0.866	17.5281	0.02099	17.5281	3.469	17.5281	0.358	17.5281	0.143	17.5281	0.002	17.5281	0.523	17.5281	0.205
17.5525	0.794	17.5525	0.16614	17.5525	4.481	17.5525	0.411	17.5525	0.133	17.5525	0.021	17.5525	0.069	17.5525	0.662
17.5768	0.732	17.5768	0.18628	17.5768	4.957	17.5768	0.362	17.5768	0.165	17.5768	-0.001	17.5768	0.234	17.5768	0.532
17.6011	0.691	17.6011	0.21742	17.6011	6.423	17.6011	0.467	17.6011	0.208	17.6011	-0.074	17.6011	0.027	17.6011	0.484
17.6254	0.897	17.6254	0.05256	17.6254	5.384	17.6254	0.428	17.6254	0.147	17.6254	0.039	17.6254	0.068	17.6254	1.117
17.6498	0.753	17.6498	0.1667	17.6498	5.179	17.6498	0.389	17.6498	0.005	17.6498	-0.086	17.6498	0.295	17.6498	1.945
17.6741	0.856	17.6741	0.23884	17.6741	4.161	17.6741	0.03	17.6741	-0.066	17.6741	0.13	17.6741	0.233	17.6741	1.289
17.6984	0.845	17.6984	0.44499	17.6984	2.318	17.6984	0.136	17.6984	-0.057	17.6984	-0.108	17.6984	0.48	17.6984	1.304
17.7227	0.856	17.7227	0.63013	17.7227	1.351	17.7227	0.035	17.7227	0.034	17.7227	0.098	17.7227	0.398	17.7227	0.473
17.7471	0.732	17.7471	0.75427	17.7471	0.982	17.7471	0.1	17.7471	-0.029	17.7471	0.303	17.7471	0.274	17.7471	0.23
17.7714	0.856	17.7714	0.88841	17.7714	0.448	17.7714	0.185	17.7714	0.135	17.7714	0.488	17.7714	1.037	17.7714	0.378
17.7957	0.928	17.7957	0.60055	17.7957	0.07	17.7957	0.146	17.7957	0.093	17.7957	1.116	17.7957	0.78	17.7957	-0.02
17.82	0.773	17.82	0.3217	17.82	0.134	17.82	0.025	17.82	0.226	17.82	0.611	17.82	0.358	17.82	-0.087
17.8444	0.835	17.8444	0.42484	17.8444	0.126	17.8444	0.111	17.8444	0.72	17.8444	0.548	17.8444	0.338	17.8444	-0.009
17.8687	0.835	17.8687	0.40498	17.8687	0.129	17.8687	0.041	17.8687	0.987	17.8687	0.311	17.8687	0.07	17.8687	0.162
17.893	0.732	17.893	0.47712	17.893	-0.002	17.893	0.003	17.893	0.801	17.893	0.012	17.893	0.143	17.893	0.209
17.9173	0.99	17.9173	0.93026	17.9173	0.331	17.9173	0.006	17.9173	0.44	17.9173	0.042	17.9173	0.062	17.9173	0.03
17.9416	0.969	17.9416	1.81741	17.9416	0.417	17.9416	-0.012	17.9416	0.254	17.9416	0.032	17.9416	-0.03	17.9416	0.078
17.966	1.082	17.966	2.73555	17.966	0.657	17.966	0.105	17.966	-0.014	17.966	-0.113	17.966	-0.071	17.966	0.218
17.9903	0.938	17.9903	2.85869	17.9903	1.041	17.9903	0.077	17.9903	0.058	17.9903	-0.102	17.9903	0.013	17.9903	0.204
18.0146	1.062	18.0146	2.72483	18.0146	0.581	18.0146	0.287	18.0146	0.182	18.0146	-0.03	18.0146	0.086	18.0146	0.231
18.0389	1.165	18.0389	2.31297	18.0389	0.687	18.0389	0.496	18.0389	0.161	18.0389	0.011	18.0389	0.026	18.0389	0.269
18.0633	1.557	18.0633	1.16912	18.0633	0.681	18.0633	0.51	18.0633	0.399	18.0633	0.001	18.0633	0.12	18.0633	0.615
18.0876	1.309	18.0876	0.96226	18.0876	0.725	18.0876	0.565	18.0876	-0.054	18.0876	0.114	18.0876	0.152	18.0876	0.364
18.1119	1.32	18.1119	0.2924	18.1119	0.801	18.1119	0.486	18.1119	0.059	18.1119	-0.051	18.1119	0.556	18.1119	0.351
18.1362	1.299	18.1362	0.61254	18.1362	0.568	18.1362	0.253	18.1362	0.204	18.1362	-0.009	18.1362	0.496	18.1362	0.584
18.1606	0.928	18.1606	0.61268	18.1606	0.613	18.1606	0.04	18.1606	0.195	18.1606	0.043	18.1606	0.054	18.1606	0.88
18.1849	1.031	18.1849	0.59183	18.1849	0.452	18.1849	0.116	18.1849	0.68	18.1849	0.249	18.1849	-0.037	18.1849	0.815
18.2092	0.959	18.2092	0.72597	18.2092	0.363	18.2092	-0.107	18.2092	0.496	18.2092	0.229	18.2092	0.284	18.2092	0.44
18.2335	0.979	18.2335	1.21111	18.2335	0.058	18.2335	-0.021	18.2335	0.899	18.2335	0.167	18.2335	0.822	18.2335	0.478
18.2578	1.33	18.2578	0.77825	18.2578	-0.144	18.2578	0.179	18.2578	0.673	18.2578	0.364	18.2578	3.01	18.2578	0.413
18.2822	1.34	18.2822	0.65439	18.2822	-0.052	18.2822	-0.002	18.2822	0.643	18.2822	0.498	18.2822	5.425	18.2822	0.235
18.3065	1.206	18.3065	0.45853	18.3065	-0.032	18.3065	-0.081	18.3065	0.16	18.3065	0.396	18.3065	2.901	18.3065	0.221
18.3308	1.072	18.3308	0.20168	18.3308	0.009	18.3308	0.016	18.3308	0.121	18.3308	0.201	18.3308	3.017	18.3308	0.218
18.3551	0.948	18.3551	0.29382	18.3551	-0.002	18.3551	-0.072	18.3551	0.153	18.3551	0.273	18.3551	0.524	18.3551	0.308
18.3795	1.464	18.3795	0.24296	18.3795	-0.054	18.3795	-0.062	18.3795	0.31	18.3795	0.12	18.3795	-0.04	18.3795	0.068
18.4038	1.701	18.4038	0.4901	18.4038	-0.054	18.4038	0.082	18.4038	0.013	18.4038	0.028	18.4038	0.251	18.4038	0.014
18.4281	2.175	18.4281	0.82024	18.4281	0.41	18.4281	0.031	18.4281	0.355	18.4281	0.07	18.4281	-0.045	18.4281	0.341
18.4524	2.165	18.4524	1.31539	18.4524	0.203	18.4524	-0.031	18.4524	0.346	18.4524	0.019	18.4524	0.164	18.4524	0.277
18.4768	2	18.4768	1.50053	18.4768	0.348	18.4768	0.01	18.4768	0.452	18.4768	0.195	18.4768	0.012	18.4768	0.099
18.5011	1.794	18.5011	1.85167	18.5011	0.595	18.5011	-0.103	18.5011	0.351	18.5011	0.031	18.5011	-0.016	18.5011	0.024
18.5254	1.464	18.5254	1.75881	18.5254	0.461	18.5254	0.134	18.5254	0.364	18.5254	0.197	18.5254	-0.096	18.5254	0.331
18.5497	1.371	18.5497	1.75895	18.5497	0.606	18.5497	-0.092	18.5497	0.397	18.5497	0.137	18.5497	-0.079	18.5497	0.133
18.574	0.876	18.574	1.4601	18.574	0.771	18.574	0.166	18.574	0.245	18.574	0.158	18.574	0.091	18.574	-0.014
18.5984	0.794	18.5984	1.08924	18.5984	0.72	18.5984	0.001	18.5984	0.413	18.5984	0.077	18.5984	0.025	18.5984	0.159
18.6227	0.66	18.6227	0.48138	18.6227	0.473	18.6227	0.157	18.6227	0.241	18.6227	0.037	18.6227	-0.072	18.6227	-0.049
18.647	0.814	18.647	0.40952	18.647	0.391	18.647	-0.101	18.647	0.13	18.647	-0.023	18.647	-0.034	18.647	0.072
18.6713	0.732	18.6713	0.25466	18.6713	0.351	18.6713	0.014	18.6713	0.092	18.6713	0.174	18.6713	0.106	18.6713	-0.074
18.6957	1.402	18.6957	0.30681	18.6957	0.114	18.6957	-0.037	18.6957	0.085	18.6957	-0.062	18.6957	0.05	18.6957	0.151
18.72	1.309	18.72	0.49195	18.72	0.053	18.72	-0.047	18.72	-0.046	18.72	0.063	18.72	-0.005	18.72	0.334
18.7443	1.01	18.7443	0.31709	18.7443	0.013	18.7443	0.088	18.7443	-0.063	18.7443	0.075	18.7443	0.146	18.7443	0.116
18.7686	1.052	18.7686	0.27623	18.7686	0.004	18.7686	-0.035	18.7686	-0.012	18.7686	-0.016	18.7686	-0.012	18.7686	0.062
18.793	0.619	18.793	0.18337	18.793	-0.016	18.793	0.224	18.793	0.028	18.793	-0.014	18.793	0.17	18.793	0.153
18.8173	0.691	18.8173	0.26551	18.8173	0.14	18.8173	0.101	18.8173	-0.034	18.8173	0.101	18.8173	-0.091	18.8173	-0.055
18.8416	0.536	18.8416	0.01866	18.8416	0.152	18.8416	0.103	18.8416	0.079	18.8416	0.031	18.8416	0.111	18.8416	0.078
18.8659	0.732	18.8659	0.1428	18.8659	-0.104	18.8659	-0.071	18.8659	0.078	18.8659	0.012	18.8659	-0.212	18.8659	0.633
18.8902	0.773	18.8902	0.27694	18.8902	0.103	18.8902	-0.104	18.8902	0.191	18.8902	-0.12	18.8902	0.27	18.8902	1.178
18.9146	0.588	18.9146	0.23508	18.9146	-0.019	18.9146	0.132	18.9146	0.15	18.9146	-0.088	18.9146	0.133	18.9146	1.032
18.9389	0.598	18.9389	0.28722	18.9389	0.024	18.9389	0.038	18.9389	-0.015	18.9389	0.068	18.9389	0.47	18.9389	1.361
18.9632	0.639	18.9632	0.45237	18.9632	0.026	18.9632	-0.004	18.9632	-0.087	18.9632	0.09	18.9632	0.477	18.9632	0.906
18.9875	0.753	18.9875	0.69951	18.9875	-0.004	18.9875	-0.067	18.9875	0.023	18.9875	0.102	18.9875	0.433	18.9875	0.894
19.0119	0.866	19.0119	1.00965	19.0119	-0.002	19.0119	0.221	19.0119	0.061	19.0119	-0.134	19.0119	0.843	19.0119	0.831
19.0362	0.722	19.0362	1.02979	19.0362	0.145	19.0362	0.169	19.0362	0.212	19.0362	-0.05	19.0362	0.654	19.0362	0.624
19.0605	0.732	19.0605	0.96793	19.0605	0.136	19.0605	0.116	19.0605	0.085	19.0605	-0.11	19.0605	1.116	19.0605	0.653
19.0848	0.701	19.0848	0.87608	19.0848	0.056	19.0848	0.116	19.0848	-0.062	19.0848	-0.031	19.0848	0.732	19.0848	0.704
19.1092	0.928	19.1092	0.74222	19.1092	-0.055	19.1092	0.125	19.1092	-0.055	19.1092	0.007	19.1092	0.42	19.1092	0.486
19.1335	0.835	19.1335	0.77336	19.1335	-0.022	19.1335	0.084	19.1335	0.015	19.1335	-0.038	19.1335	0.263	19.1335	0.465
19.1578	1.031	19.1578	0.4325	19.1578	-0.091	19.1578	0.104	19.1578	-0.06	19.1578	0.082	19.1578	0.271	19.1578	0.402
19.1821	0.835	19.1821	0.31964	19.1821	0.045	19.1821	0	19.1821	0.01	19.1821	-0.076	19.1821	0.053	19.1821	0.381
19.2064	0.948	19.2064	0.17579	19.2064	0.14	19.2064	-0.021	19.2064	0.049	19.2064	-0.11	19.2064	-0.001	19.2064	0.246
19.2308	0.742	19.2308	0.09293	19.2308	0.102	19.2308	-0.031	19.2308	0.026	19.2308	0.227	19.2308	-0.054	19.2308	0.318
19.2551	0.887	19.2551	0.31007	19.2551	0.115	19.2551	0.154	19.2551	0.075	19.2551	0.038	19.2551	0.232	19.2551	0.513
19.2794	0.897	19.2794	0.19621	19.2794	0.004	19.2794	0.061	19.2794	-0.061	19.2794	0.19	19.2794	0.169	19.2794	0.43
19.3037	0.784	19.3037	0.12435	19.3037	-0.013	19.3037	0.123	19.3037	-0.011	19.3037	0.042	19.3037	0.26	19.3037	0.44
19.3281	1	19.3281	0.1765	19.3281	-0.072	19.3281	-0.011	19.3281	-0.065	19.3281	-0.002	19.3281	0.485	19.3281	-0.004
19.3524	0.691	19.3524	0.32064	19.3524	-0.022	19.3524	0.061	19.3524	-0.046	19.3524	0.077	19.3524	0.329	19.3524	0.047
19.3767	0.928	19.3767	0.35178	19.3767	-0.024	19.3767	-0.042	19.3767	-0.016	19.3767	-0.101	19.3767	0.204	19.3767	-0.015
19.401	0.969	19.401	0.11492	19.401	-0.046	19.401	0.061	19.401	-0.131	19.401	-0.083	19.401	0.326	19.401	0.078
19.4254	0.948	19.4254	0.44506	19.4254	0.107	19.4254	-0.011	19.4254	0.084	19.4254	-0.003	19.4254	0.108	19.4254	0.005
19.4497	1.031	19.4497	0.5482	19.4497	0.003	19.4497	-0.072	19.4497	0.083	19.4497	-0.099	19.4497	0.148	19.4497	-0.005
19.474	1.041	19.474	0.35235	19.474	0.053	19.474	-0.034	19.474	-0.042	19.474	0.001	19.474	0.034	19.474	0.077
19.4983	0.845	19.4983	0.33149	19.4983	0.124	19.4983	0.066	19.4983	0.132	19.4983	-0.032	19.4983	0.033	19.4983	-0.118
19.5226	1	19.5226	0.59963	19.5226	0.339	19.5226	0.033	19.5226	0.069	19.5226	-0.148	19.5226	-0.02	19.5226	-0.071
19.547	1.361	19.547	0.32177	19.547	0.307	19.547	0.05	19.547	-0.004	19.547	-0.047	19.547	0.072	19.547	-0.167
19.5713	1.175	19.5713	0.42491	19.5713	0.306	19.5713	0.058	19.5713	0.181	19.5713	-0.019	19.5713	-0.104	19.5713	0.128
19.5956	1.196	19.5956	0.66206	19.5956	0.532	19.5956	0.117	19.5956	0.408	19.5956	0.072	19.5956	0.154	19.5956	-0.195
19.6199	1.082	19.6199	1.2192	19.6199	1.243	19.6199	0.115	19.6199	0.284	19.6199	-0.013	19.6199	-0.002	19.6199	-0.013
19.6443	1.093	19.6443	1.77634	19.6443	2.17	19.6443	-0.032	19.6443	0.294	19.6443	0.047	19.6443	0.122	19.6443	0.066
19.6686	1.206	19.6686	2.12648	19.6686	3.262	19.6686	0.131	19.6686	0.005	19.6686	-0.099	19.6686	0.688	19.6686	0.032
19.6929	1.381	19.6929	2.08562	19.6929	3.22	19.6929	0.231	19.6929	0.066	19.6929	-0.039	19.6929	0.348	19.6929	-0.064
19.7172	1.052	19.7172	2.50777	19.7172	2.632	19.7172	-0.029	19.7172	0.036	19.7172	0.031	19.7172	0.286	19.7172	-0.026
19.7416	1.258	19.7416	2.65291	19.7416	1.415	19.7416	0.083	19.7416	0.015	19.7416	0.565	19.7416	0.172	19.7416	0.084
19.7659	1.124	19.7659	2.92105	19.7659	0.745	19.7659	-0.043	19.7659	0.036	19.7659	1.182	19.7659	-0.013	19.7659	0.195
19.7902	1.072	19.7902	2.96219	19.7902	0.353	19.7902	0.068	19.7902	-0.067	19.7902	0.943	19.7902	0.131	19.7902	-0.004
19.8145	1.113	19.8145	2.11733	19.8145	0.168	19.8145	-0.037	19.8145	-0.058	19.8145	0.364	19.8145	0.379	19.8145	0.323
19.8388	1.216	19.8388	1.17947	19.8388	0.126	19.8388	0.064	19.8388	0.002	19.8388	0.239	19.8388	0.338	19.8388	0.268
19.8632	1.227	19.8632	0.72562	19.8632	0.106	19.8632	0.114	19.8632	0.176	19.8632	-0.051	19.8632	0.276	19.8632	0.173
19.8875	1.072	19.8875	0.91176	19.8875	0.085	19.8875	-0.146	19.8875	-0.032	19.8875	-0.053	19.8875	0.483	19.8875	0.098
19.9118	1.124	19.9118	1.2109	19.9118	0.075	19.9118	-0.075	19.9118	0.121	19.9118	-0.044	19.9118	0.452	19.9118	0.157
19.9361	1.01	19.9361	1.44804	19.9361	0.055	19.9361	0.087	19.9361	0.12	19.9361	0.047	19.9361	0.319	19.9361	0.319
19.9605	0.948	19.9605	1.22118	19.9605	0.045	19.9605	-0.04	19.9605	-0.139	19.9605	0.201	19.9605	0.124	19.9605	0.688
19.9848	0.866	19.9848	1.76733	19.9848	0.066	19.9848	0.081	19.9848	-0.068	19.9848	0.23	19.9848	0.269	19.9848	0.582
20.0091	0.948	20.0091	1.37547	20.0091	0.201	20.0091	0.12	20.0091	-0.041	20.0091	0.157	20.0091	0.053	20.0091	0.518
20.0334	0.928	20.0334	1.13861	20.0334	0.47	20.0334	0.179	20.0334	0.182	20.0334	0.135	20.0334	0.456	20.0334	0.515
20.0578	0.856	20.0578	1.33475	20.0578	0.532	20.0578	0.114	20.0578	-0.018	20.0578	0.093	20.0578	0.055	20.0578	0.265
20.0821	0.814	20.0821	1.14989	20.0821	1.214	20.0821	-0.043	20.0821	0.143	20.0821	-0.135	20.0821	0.067	20.0821	0.191
20.1064	1.021	20.1064	1.10804	20.1064	1.07	20.1064	0.068	20.1064	-0.056	20.1064	0.07	20.1064	0.037	20.1064	0.24
20.1307	0.763	20.1307	1.59318	20.1307	1.37	20.1307	-0.007	20.1307	0.043	20.1307	-0.055	20.1307	0.08	20.1307	0.321
20.155	0.784	20.155	1.79932	20.155	1.835	20.155	0.156	20.155	0.122	20.155	0.088	20.155	0.287	20.155	0.236
20.1794	0.948	20.1794	2.04746	20.1794	1.589	20.1794	0.442	20.1794	0.16	20.1794	0.026	20.1794	0.144	20.1794	0.172
20.2037	0.814	20.2037	2.0476	20.2037	1.023	20.2037	0.728	20.2037	-0.008	20.2037	0.066	20.2037	-0.122	20.2037	0.191
20.228	0.722	20.228	1.77975	20.228	0.86	20.228	1.056	20.228	0.102	20.228	0.055	20.228	0.106	20.228	0.447
20.2523	0.835	20.2523	1.32589	20.2523	0.83	20.2523	1.106	20.2523	0.109	20.2523	0.075	20.2523	-0.047	20.2523	0.558
20.2767	0.649	20.2767	0.88303	20.2767	0.523	20.2767	1.609	20.2767	0.179	20.2767	0.219	20.2767	0.089	20.2767	0.66
20.301	0.959	20.301	0.58417	20.301	0.534	20.301	1.844	20.301	0.403	20.301	0.239	20.301	0.297	20.301	0.596
20.3253	0.691	20.3253	0.36731	20.3253	0.65	20.3253	1.44	20.3253	0.627	20.3253	0.125	20.3253	0.227	20.3253	0.697
20.3496	0.649	20.3496	0.48146	20.3496	0.466	20.3496	1.397	20.3496	1.037	20.3496	0.269	20.3496	0.095	20.3496	0.974
20.374	0.68	20.374	0.4296	20.374	0.2	20.374	1.395	20.374	1.642	20.374	0.103	20.374	0.242	20.374	1.333
20.3983	0.742	20.3983	0.69774	20.3983	0.13	20.3983	0.909	20.3983	2.186	20.3983	-0.093	20.3983	0.357	20.3983	0.909
20.4226	0.773	20.4226	0.56388	20.4226	0.193	20.4226	0.948	20.4226	2.535	20.4226	0.061	20.4226	0.597	20.4226	0.99
20.4469	0.722	20.4469	0.57402	20.4469	0.134	20.4469	0.699	20.4469	3.172	20.4469	-0.094	20.4469	0.27	20.4469	0.7
20.4712	0.804	20.4712	0.64616	20.4712	-0.029	20.4712	0.481	20.4712	3.5	20.4712	0.195	20.4712	0.138	20.4712	0.318
20.4956	0.67	20.4956	0.85331	20.4956	0.066	20.4956	0.315	20.4956	4.096	20.4956	0.102	20.4956	0.337	20.4956	0.162
20.5199	0.784	20.5199	0.70845	20.5199	0.172	20.5199	0.19	20.5199	3.857	20.5199	0.215	20.5199	0.37	20.5199	0.305
20.5442	0.825	20.5442	0.77059	20.5442	-0.022	20.5442	0.189	20.5442	3.855	20.5442	0.318	20.5442	0.105	20.5442	0.263
20.5685	0.814	20.5685	0.80173	20.5685	-0.071	20.5685	-0.08	20.5685	3.307	20.5685	0.266	20.5685	0.18	20.5685	0.427
20.5929	0.835	20.5929	1.04987	20.5929	-0.071	20.5929	-0.061	20.5929	2.182	20.5929	0.215	20.5929	0.503	20.5929	0.467
20.6172	0.825	20.6172	0.75102	20.6172	0.02	20.6172	0.072	20.6172	1.707	20.6172	0.236	20.6172	0.227	20.6172	0.672
20.6415	0.639	20.6415	0.51316	20.6415	0.141	20.6415	0.071	20.6415	1.221	20.6415	0.133	20.6415	0.375	20.6415	0.403
20.6658	0.845	20.6658	0.3903	20.6658	0.128	20.6658	-0.033	20.6658	0.55	20.6658	0.318	20.6658	0.172	20.6658	-0.01
20.6902	0.856	20.6902	0.24544	20.6902	0.198	20.6902	-0.075	20.6902	0.456	20.6902	0.236	20.6902	0.32	20.6902	0.072
20.7145	0.68	20.7145	0.27658	20.7145	0.33	20.7145	0.151	20.7145	0.136	20.7145	0.195	20.7145	0.241	20.7145	-0.114
20.7388	0.649	20.7388	0.40073	20.7388	0.225	20.7388	0.171	20.7388	0.083	20.7388	0.257	20.7388	0.244	20.7388	-0.002
20.7631	0.773	20.7631	0.37987	20.7631	0.233	20.7631	0.108	20.7631	0.31	20.7631	0.433	20.7631	-0.01	20.7631	0.07
20.7875	0.701	20.7875	0.33901	20.7875	0.314	20.7875	0.18	20.7875	0.082	20.7875	0.114	20.7875	0.056	20.7875	-0.033
20.8118	0.825	20.8118	0.25715	20.8118	0.364	20.8118	0.097	20.8118	0.113	20.8118	0.207	20.8118	0.111	20.8118	0.234
20.8361	1	20.8361	0.48429	20.8361	0.063	20.8361	0.179	20.8361	-0.011	20.8361	0.002	20.8361	0.094	20.8361	0.193
20.8604	0.825	20.8604	0.29844	20.8604	0.154	20.8604	0.178	20.8604	-0.032	20.8604	0.054	20.8604	-0.129	20.8604	0.161
20.8847	0.835	20.8847	0.42258	20.8847	0.163	20.8847	0.085	20.8847	-0.053	20.8847	-0.059	20.8847	-0.09	20.8847	0.12
20.9091	1.031	20.9091	0.42272	20.9091	0.182	20.9091	0.178	20.9091	0.05	20.9091	0.066	20.9091	0.031	20.9091	0.285
20.9334	0.866	20.9334	0.69086	20.9334	0.129	20.9334	-0.152	20.9334	0.03	20.9334	-0.088	20.9334	-0.054	20.9334	0.254
20.9577	0.938	20.9577	0.763	20.9577	0.159	20.9577	0.26	20.9577	0.432	20.9577	-0.087	20.9577	0.016	20.9577	0.419
20.982	0.887	20.982	0.92814	20.982	-0.028	20.982	0.301	20.982	0.309	20.982	0.058	20.982	0.179	20.982	0.532
21.0064	0.969	21.0064	0.89729	21.0064	0.053	21.0064	0.662	21.0064	0.598	21.0064	0.079	21.0064	0.249	21.0064	0.47
21.0307	0.948	21.0307	0.81443	21.0307	0.104	21.0307	0.92	21.0307	0.939	21.0307	0.07	21.0307	0	21.0307	0.244
21.055	0.804	21.055	0.46457	21.055	-0.083	21.055	1.415	21.055	1.363	21.055	-0.011	21.055	0.359	21.055	0.44
21.0793	0.876	21.0793	0.54671	21.0793	-0.001	21.0793	2.178	21.0793	1.157	21.0793	0.258	21.0793	0.388	21.0793	0.141
21.1037	0.825	21.1037	0.09386	21.1037	0.163	21.1037	3.116	21.1037	1.241	21.1037	0.176	21.1037	0.52	21.1037	0.121
21.128	1.031	21.128	0.403	21.128	0.317	21.128	3.735	21.128	1.036	21.128	0.116	21.128	1.632	21.128	0.152
21.1523	1.258	21.1523	0.27914	21.1523	0.213	21.1523	5.086	21.1523	0.501	21.1523	-0.027	21.1523	1.682	21.1523	0.132
21.1766	0.938	21.1766	0.20728	21.1766	0.265	21.1766	6.107	21.1766	0.626	21.1766	0.067	21.1766	2.278	21.1766	0.091
21.2009	1.206	21.2009	0.31042	21.2009	0.13	21.2009	5.273	21.2009	0.71	21.2009	0.079	21.2009	2.555	21.2009	0.154
21.2253	1.289	21.2253	0.34156	21.2253	0.223	21.2253	3.861	21.2253	0.639	21.2253	-0.178	21.2253	2.492	21.2253	0.258
21.2496	1.361	21.2496	0.07371	21.2496	0.459	21.2496	2.47	21.2496	0.548	21.2496	0.133	21.2496	2.573	21.2496	0.299
21.2739	1.351	21.2739	0.14585	21.2739	0.727	21.2739	1.718	21.2739	0.498	21.2739	-0.01	21.2739	1.417	21.2739	0.62
21.2982	1.33	21.2982	0.18799	21.2982	1.036	21.2982	1.07	21.2982	0.222	21.2982	0.033	21.2982	1.437	21.2982	0.744
21.3226	1.299	21.3226	0.15713	21.3226	1.439	21.3226	0.545	21.3226	0.317	21.3226	0.241	21.3226	0.848	21.3226	0.591
21.3469	1.515	21.3469	0.16578	21.3469	1.758	21.3469	1.061	21.3469	0.154	21.3469	0.005	21.3469	0.291	21.3469	0.633
21.3712	1.299	21.3712	0.2252	21.3712	1.779	21.3712	1.155	21.3712	0.403	21.3712	-0.003	21.3712	0.475	21.3712	0.448
21.3955	1.485	21.3955	0.23262	21.3955	1.728	21.3955	1.29	21.3955	0.272	21.3955	0.339	21.3955	0.073	21.3955	0.14
21.4199	1.423	21.4199	0.08603	21.4199	1.491	21.4199	0.941	21.4199	0.439	21.4199	0.062	21.4199	0.309	21.4199	0.1
21.4442	1.381	21.4442	-0.00955	21.4442	1.44	21.4442	0.973	21.4442	0.071	21.4442	-0.059	21.4442	0.288	21.4442	-0.022
21.4685	1.309	21.4685	-0.00213	21.4685	0.781	21.4685	0.758	21.4685	0.29	21.4685	-0.099	21.4685	0.442	21.4685	0.03
21.4928	1.495	21.4928	0.06728	21.4928	0.462	21.4928	0.285	21.4928	0.427	21.4928	0.192	21.4928	0.246	21.4928	-0.195
21.5171	1.237	21.5171	0.2407	21.5171	0.37	21.5171	0.204	21.5171	0.316	21.5171	-0.053	21.5171	0.205	21.5171	0.044
21.5415	1.34	21.5415	0.17611	21.5415	0.092	21.5415	0.072	21.5415	0.371	21.5415	-0.051	21.5415	0.204	21.5415	0.045
21.5658	1.165	21.5658	0.25553	21.5658	0.165	21.5658	0.094	21.5658	-0.018	21.5658	0.126	21.5658	0.05	21.5658	-0.17
21.5901	1.526	21.5901	0.37695	21.5901	0.063	21.5901	0.085	21.5901	0.027	21.5901	0.087	21.5901	-0.084	21.5901	-0.038
21.6144	1.629	21.6144	0.47737	21.6144	0.095	21.6144	-0.047	21.6144	0.185	21.6144	0.048	21.6144	0.05	21.6144	0.002
21.6388	1.598	21.6388	0.50578	21.6388	0.014	21.6388	0.037	21.6388	0.106	21.6388	0.03	21.6388	0.019	21.6388	-0.113
21.6631	1.546	21.6631	0.4822	21.6631	-0.037	21.6631	0.112	21.6631	0.089	21.6631	0.032	21.6631	0.071	21.6631	0.003
21.6874	1.897	21.6874	0.39762	21.6874	-0.035	21.6874	-0.062	21.6874	0.072	21.6874	0.076	21.6874	0.102	21.6874	0.047
21.7117	1.649	21.7117	0.66304	21.7117	0.048	21.7117	0.105	21.7117	0.065	21.7117	0.017	21.7117	-0.031	21.7117	0.173
21.7361	1.608	21.7361	0.83544	21.7361	-0.074	21.7361	0.004	21.7361	0.121	21.7361	-0.053	21.7361	-0.144	21.7361	0.145
21.7604	1.629	21.7604	1.00886	21.7604	0.103	21.7604	0.182	21.7604	-0.009	21.7604	-0.009	21.7604	0.031	21.7604	0.385
21.7847	1.866	21.7847	1.31528	21.7847	-0.102	21.7847	0.009	21.7847	-0.077	21.7847	-0.058	21.7847	-0.072	21.7847	0.429
21.809	1.536	21.809	1.1577	21.809	0.024	21.809	-0.03	21.809	0.009	21.809	-0.055	21.809	0.134	21.809	0.288
21.8333	1.402	21.8333	0.71212	21.8333	-0.046	21.8333	0.024	21.8333	-0.039	21.8333	0.082	21.8333	0.145	21.8333	0.281
21.8577	1.701	21.8577	0.78153	21.8577	0.11	21.8577	0.026	21.8577	-0.035	21.8577	0.053	21.8577	0.3	21.8577	0.367
21.882	1.753	21.882	0.35595	21.882	-0.115	21.882	0.07	21.882	0.041	21.882	-0.036	21.882	0.248	21.882	0.184
21.9063	1.804	21.9063	0.38437	21.9063	-0.071	21.9063	-0.103	21.9063	0.086	21.9063	-0.137	21.9063	0.321	21.9063	0.188
21.9306	1.742	21.9306	0.37179	21.9306	-0.091	21.9306	-0.068	21.9306	0.049	21.9306	-0.051	21.9306	0.26	21.9306	0.273
21.955	1.546	21.955	0.0702	21.955	0.085	21.955	-0.043	21.955	-0.07	21.955	-0.037	21.955	0.384	21.955	0.236
21.9793	1.557	21.9793	0.18061	21.9793	-0.007	21.9793	0.054	21.9793	0.109	21.9793	-0.003	21.9793	0.22	21.9793	0.311
22.0036	1.443	22.0036	-0.09997	22.0036	0.098	22.0036	-0.055	22.0036	0.031	22.0036	0.145	22.0036	0.087	22.0036	0.438
22.0279	1.588	22.0279	0.05245	22.0279	-0.056	22.0279	0.145	22.0279	0.098	22.0279	0.066	22.0279	0.191	22.0279	0.298
22.0523	1.526	22.0523	0.00786	22.0523	-0.024	22.0523	-0.025	22.0523	0.123	22.0523	0.141	22.0523	0.284	22.0523	0.209
22.0766	1.732	22.0766	0.18563	22.0766	0.153	22.0766	0.185	22.0766	-0.006	22.0766	0.124	22.0766	0.316	22.0766	0.336
22.1009	1.742	22.1009	-0.0729	22.1009	0.247	22.1009	0.138	22.1009	-0.074	22.1009	0.148	22.1009	0.111	22.1009	0.226
22.1252	1.577	22.1252	0.18356	22.1252	0.084	22.1252	0.174	22.1252	0.117	22.1252	0.173	22.1252	0.607	22.1252	0.024
22.1495	1.794	22.1495	0.17202	22.1495	0.024	22.1495	0.158	22.1495	0.132	22.1495	0.156	22.1495	0.124	22.1495	-0.024
22.1739	1.948	22.1739	-0.05657	22.1739	0.17	22.1739	0.235	22.1739	-0.058	22.1739	0.16	22.1739	0.291	22.1739	0.053
22.1982	1.794	22.1982	0.1899	22.1982	0.12	22.1982	0.096	22.1982	0.071	22.1982	0.163	22.1982	0.313	22.1982	0.108
22.2225	1.959	22.2225	-0.04864	22.2225	0.421	22.2225	0.204	22.2225	0.087	22.2225	0.281	22.2225	0.16	22.2225	-0.032
22.2468	1.918	22.2468	0.20782	22.2468	0.196	22.2468	0.054	22.2468	0.226	22.2468	0.563	22.2468	0.615	22.2468	0.426
22.2712	1.722	22.2712	0.09324	22.2712	0.054	22.2712	0.028	22.2712	0.191	22.2712	0.258	22.2712	0.122	22.2712	0.1
22.2955	1.845	22.2955	0.0917	22.2955	0.231	22.2955	0.25	22.2955	0.228	22.2955	0.262	22.2955	0.216	22.2955	0.238
22.3198	2.134	22.3198	0.02916	22.3198	0.12	22.3198	0.338	22.3198	0.399	22.3198	0.503	22.3198	-0.039	22.3198	0.119
22.3441	2.124	22.3441	0.03762	22.3441	0.215	22.3441	0.085	22.3441	0.827	22.3441	0.198	22.3441	0.509	22.3441	0.299
22.3685	2.32	22.3685	0.17104	22.3685	0.506	22.3685	0.266	22.3685	0.668	22.3685	0.367	22.3685	0.233	22.3685	0.241
22.3928	2.155	22.3928	0.0145	22.3928	0.272	22.3928	0.251	22.3928	0.572	22.3928	0.278	22.3928	0.359	22.3928	0.091
22.4171	2.454	22.4171	0.15796	22.4171	0.264	22.4171	0.318	22.4171	0.31	22.4171	0.479	22.4171	0.258	22.4171	0.354
22.4414	2.258	22.4414	0.05342	22.4414	0.298	22.4414	0.087	22.4414	0.368	22.4414	0.153	22.4414	0.322	22.4414	0.245
22.4657	2.557	22.4657	0.17589	22.4657	0.29	22.4657	0.577	22.4657	0.148	22.4657	0.477	22.4657	0.428	22.4657	0.621
22.4901	2.392	22.4901	0.1233	22.4901	0.365	22.4901	0.387	22.4901	0.289	22.4901	0.523	22.4901	0.554	22.4901	0.368
22.5144	2.423	22.5144	0.28676	22.5144	0.481	22.5144	0.207	22.5144	0.234	22.5144	0.63	22.5144	0.299	22.5144	0.29
22.5387	2.32	22.5387	0.02822	22.5387	0.34	22.5387	0.172	22.5387	0.292	22.5387	0.356	22.5387	0.178	22.5387	0.079
22.563	2.814	22.563	0.61469	22.563	0.271	22.563	0.312	22.563	0.031	22.563	0.433	22.563	0.202	22.563	0.754
22.5874	2.402	22.5874	0.5821	22.5874	0.171	22.5874	0.019	22.5874	0.049	22.5874	0.469	22.5874	0.534	22.5874	0.604
22.6117	2.351	22.6117	0.58156	22.6117	0.03	22.6117	0.262	22.6117	0.036	22.6117	0.474	22.6117	0.177	22.6117	0.403
22.636	2.052	22.636	0.85802	22.636	0.281	22.636	0.175	22.636	0.115	22.636	0.509	22.636	0.293	22.636	0.387
22.6603	2.062	22.6603	0.80549	22.6603	0.13	22.6603	0.089	22.6603	0.143	22.6603	0.473	22.6603	0.317	22.6603	0.269
22.6847	2.082	22.6847	0.7529	22.6847	0.174	22.6847	-0.07	22.6847	0.099	22.6847	0.261	22.6847	0.155	22.6847	0.522
22.709	2.216	22.709	0.42136	22.709	0.075	22.709	-0.043	22.709	-0.027	22.709	0.493	22.709	0.19	22.709	0.414
22.7333	2.082	22.7333	0.63747	22.7333	0.244	22.7333	0.108	22.7333	0.208	22.7333	0.282	22.7333	0.059	22.7333	0.388
22.7576	2.021	22.7576	0.52367	22.7576	0.165	22.7576	0.29	22.7576	0.01	22.7576	0.369	22.7576	0.155	22.7576	0.641
22.7819	1.948	22.7819	0.35788	22.7819	-0.048	22.7819	0.1	22.7819	-0.065	22.7819	0.56	22.7819	0.231	22.7819	0.389
22.8063	1.794	22.8063	0.15104	22.8063	0.245	22.8063	-0.12	22.8063	-0.015	22.8063	0.173	22.8063	0.544	22.8063	0.838
22.8306	1.773	22.8306	-0.01375	22.8306	0.311	22.8306	0.176	22.8306	-0.017	22.8306	0.323	22.8306	0.62	22.8306	0.493
22.8549	1.732	22.8549	0.21245	22.8549	0.552	22.8549	0.069	22.8549	-0.153	22.8549	0.122	22.8549	0.521	22.8549	0.602
22.8792	1.536	22.8792	-0.00434	22.8792	0.412	22.8792	-0.079	22.8792	0.062	22.8792	-0.007	22.8792	0.855	22.8792	0.401
22.9036	1.67	22.9036	-0.10818	22.9036	0.478	22.9036	0.072	22.9036	-0.043	22.9036	0.194	22.9036	1.725	22.9036	0.108
22.9279	1.588	22.9279	-0.01597	22.9279	0.493	22.9279	0.028	22.9279	0.038	22.9279	0.303	22.9279	2.739	22.9279	0.094
22.9522	1.557	22.9522	-0.02677	22.9522	0.209	22.9522	0.097	22.9522	-0.159	22.9522	0.432	22.9522	3.403	22.9522	0.089
22.9765	1.485	22.9765	0.03444	22.9765	-0.044	22.9765	0.104	22.9765	0.035	22.9765	0.221	22.9765	4.212	22.9765	0.157
23.0009	1.557	23.0009	0.0336	23.0009	0.084	23.0009	-0.002	23.0009	-0.059	23.0009	0.165	23.0009	4.866	23.0009	-0.115
23.0252	1.381	23.0252	-0.01819	23.0252	0.047	23.0252	-0.14	23.0252	0.095	23.0252	0.036	23.0252	4.777	23.0252	0.118
23.0495	1.32	23.0495	-0.04899	23.0495	0.042	23.0495	0.022	23.0495	0.166	23.0495	0.166	23.0495	5.339	23.0495	-0.062
23.0738	1.165	23.0738	-0.15278	23.0738	-0.056	23.0738	0.061	23.0738	0.196	23.0738	-0.014	23.0738	5.745	23.0738	-0.045
23.0981	1.392	23.0981	-0.08157	23.0981	0.011	23.0981	0.233	23.0981	0.113	23.0981	0.188	23.0981	5.565	23.0981	0.147
23.1225	1.247	23.1225	-0.10241	23.1225	0.067	23.1225	0.21	23.1225	0.051	23.1225	0.286	23.1225	5.951	23.1225	0.112
23.1468	1.443	23.1468	-0.07221	23.1468	-0.123	23.1468	0.269	23.1468	0.102	23.1468	0.21	23.1468	5.451	23.1468	-0.118
23.1711	1.309	23.1711	0	23.1711	0.006	23.1711	0.617	23.1711	0.122	23.1711	0.391	23.1711	5.631	23.1711	-0.109
23.1954	1.258	23.1954	0.14278	23.1954	0.021	23.1954	0.418	23.1954	-0.033	23.1954	0.49	23.1954	4.729	23.1954	0.004
23.2198	1.639	23.2198	-0.01249	23.2198	0.089	23.2198	0.612	23.2198	-0.054	23.2198	0.197	23.2198	3.002	23.2198	-0.017
23.2441	1.474	23.2441	0.23429	23.2441	0.166	23.2441	0.31	23.2441	0.05	23.2441	0.378	23.2441	2.224	23.2441	0.158
23.2684	1.505	23.2684	0.34607	23.2684	-0.003	23.2684	0.256	23.2684	0.05	23.2684	0.178	23.2684	1.013	23.2684	0.23
23.2927	1.268	23.2927	0.23185	23.2927	-0.039	23.2927	-0.107	23.2927	0.163	23.2927	-0.022	23.2927	0.575	23.2927	0.312
23.3171	1.103	23.3171	0.22058	23.3171	-0.095	23.3171	0.004	23.3171	-0.001	23.3171	0.077	23.3171	0.313	23.3171	0.198
23.3414	1.485	23.3414	0.42636	23.3414	0.042	23.3414	-0.09	23.3414	-0.042	23.3414	-0.184	23.3414	0.277	23.3414	0.322
23.3657	1.237	23.3657	0.43514	23.3657	0.108	23.3657	-0.006	23.3657	0.061	23.3657	-0.126	23.3657	-0.016	23.3657	0.373
23.39	1.155	23.39	0.44491	23.39	-0.064	23.39	-0.034	23.39	0.011	23.39	-0.048	23.39	-0.082	23.39	0.105
23.4143	1.247	23.4143	0.50569	23.4143	0.063	23.4143	0.061	23.4143	0.032	23.4143	0.021	23.4143	0.161	23.4143	0.002
23.4387	1.423	23.4387	0.24743	23.4387	0.026	23.4387	-0.07	23.4387	-0.081	23.4387	-0.024	23.4387	-0.143	23.4387	0.116
23.463	1.402	23.463	0.3702	23.463	0.102	23.463	0.066	23.463	-0.038	23.463	0.044	23.463	0.173	23.463	0.425
23.4873	1.309	23.4873	0.04998	23.4873	0.24	23.4873	0.172	23.4873	0.055	23.4873	-0.125	23.4873	-0.192	23.4873	0.044
23.5116	1.32	23.5116	0.11076	23.5116	0.275	23.5116	-0.063	23.5116	0.108	23.5116	-0.077	23.5116	0.165	23.5116	0.127
23.536	1.485	23.536	-0.03451	23.536	0.238	23.536	0.291	23.536	-0.025	23.536	-0.08	23.536	0.666	23.536	0.158
23.5603	1.402	23.5603	0.12927	23.5603	0.53	23.5603	0.593	23.5603	0.142	23.5603	0.04	23.5603	0.652	23.5603	0.251
23.5846	1.619	23.5846	0.06605	23.5846	0.669	23.5846	0.637	23.5846	-0.012	23.5846	0.171	23.5846	0.411	23.5846	-0.006
23.6089	1.155	23.6089	0.06583	23.6089	0.869	23.6089	0.908	23.6089	-0.031	23.6089	-0.152	23.6089	0.314	23.6089	0.129
23.6333	1.443	23.6333	0.30156	23.6333	1.275	23.6333	0.808	23.6333	0.074	23.6333	-0.176	23.6333	0.301	23.6333	-0.067
23.6576	1.247	23.6576	0.09434	23.6576	1.579	23.6576	0.625	23.6576	0.21	23.6576	0.043	23.6576	0.245	23.6576	-0.056
23.6819	1.351	23.6819	0.14512	23.6819	1.419	23.6819	0.587	23.6819	0.16	23.6819	-0.087	23.6819	0.448	23.6819	0.254
23.7062	1.165	23.7062	0.0929	23.7062	1.392	23.7062	0.323	23.7062	0.296	23.7062	0.081	23.7062	0.362	23.7062	0.245
23.7305	1.443	23.7305	0.30868	23.7305	1.026	23.7305	0.336	23.7305	0.237	23.7305	0.033	23.7305	0.019	23.7305	0.266
23.7549	1.485	23.7549	0.16341	23.7549	1.041	23.7549	0.267	23.7549	0.125	23.7549	0.129	23.7549	0.521	23.7549	0.556
23.7792	1.412	23.7792	0.29619	23.7792	0.438	23.7792	0.178	23.7792	0.293	23.7792	0.226	23.7792	0.611	23.7792	0.959
23.8035	1.392	23.8035	0.27497	23.8035	0.288	23.8035	0.202	23.8035	0.192	23.8035	0.168	23.8035	0.721	23.8035	0.816
23.8278	1.701	23.8278	0.41774	23.8278	0.386	23.8278	0.33	23.8278	-0.187	23.8278	0.326	23.8278	0.605	23.8278	1.023
23.8522	1.454	23.8522	0.27248	23.8522	0.278	23.8522	0.148	23.8522	0.125	23.8522	0.134	23.8522	0.788	23.8522	1.416
23.8765	1.495	23.8765	0.05526	23.8765	0.541	23.8765	0.152	23.8765	0.242	23.8765	0.004	23.8765	0.857	23.8765	1.953
23.9008	1.423	23.9008	0.18803	23.9008	0.423	23.9008	-0.133	23.9008	-0.096	23.9008	0.162	23.9008	0.885	23.9008	1.831
23.9251	1.309	23.9251	0.26981	23.9251	0.449	23.9251	-0.057	23.9251	0.33	23.9251	-0.061	23.9251	0.656	23.9251	1.884
23.9495	1.536	23.9495	0.26955	23.9495	0.351	23.9495	0.235	23.9495	0.251	23.9495	0.088	23.9495	0.654	23.9495	1.535
23.9738	1.691	23.9738	0.12332	23.9738	0.336	23.9738	0.229	23.9738	0.47	23.9738	0.019	23.9738	0.724	23.9738	1.031
23.9981	1.557	23.9981	0.5251	23.9981	0.61	23.9981	-0.097	23.9981	0.484	23.9981	0.096	23.9981	1	23.9981	0.775
24.0224	1.402	24.0224	0.38988	24.0224	0.502	24.0224	-0.051	24.0224	0.539	24.0224	0.069	24.0224	1.451	24.0224	0.539
24.0468	1.423	24.0468	0.58461	24.0468	0.962	24.0468	0.066	24.0468	0.615	24.0468	-0.009	24.0468	0.964	24.0468	0.407
24.0711	1.32	24.0711	1.07839	24.0711	1.03	24.0711	0.194	24.0711	0.289	24.0711	0.067	24.0711	1.024	24.0711	0.625
24.0954	1.34	24.0954	2.82017	24.0954	1.304	24.0954	-0.09	24.0954	0.282	24.0954	-0.042	24.0954	1.208	24.0954	0.575
24.1197	1.495	24.1197	5.05595	24.1197	1.702	24.1197	0.08	24.1197	0.111	24.1197	-0.203	24.1197	1.443	24.1197	1.124
24.144	1.423	24.144	6.75673	24.144	2.522	24.144	0.373	24.144	0.012	24.144	-0.064	24.144	1.359	24.144	1.971
24.1684	1.443	24.1684	9.51846	24.1684	3.601	24.1684	0.078	24.1684	0.15	24.1684	-0.101	24.1684	1.327	24.1684	2.921
24.1927	1.371	24.1927	11.7852	24.1927	4.184	24.1927	0.392	24.1927	0.031	24.1927	0.12	24.1927	1.16	24.1927	3.934
24.217	1.351	24.217	15.754	24.217	3.449	24.217	0.521	24.217	0.056	24.217	0.114	24.217	1.014	24.217	4.307
24.2413	1.505	24.2413	20.8968	24.2413	3.723	24.2413	0.639	24.2413	0.143	24.2413	0.119	24.2413	1.693	24.2413	3.886
24.2657	1.67	24.2657	19.9585	24.2657	3.699	24.2657	1.386	24.2657	-0.151	24.2657	-0.031	24.2657	1.424	24.2657	4.012
24.29	1.247	24.29	15.5343	24.29	2.984	24.29	1.102	24.29	-0.095	24.29	0.066	24.29	1.186	24.29	3.293
24.3143	1.423	24.3143	12.3891	24.3143	2.115	24.3143	1.056	24.3143	-0.064	24.3143	-0.094	24.3143	1.205	24.3143	2.368
24.3386	1.588	24.3386	7.02786	24.3386	1.905	24.3386	0.762	24.3386	0.06	24.3386	0.21	24.3386	1.08	24.3386	1.772
24.363	1.402	24.363	3.7176	24.363	1.191	24.363	0.509	24.363	0.257	24.363	-0.012	24.363	1.11	24.363	1.434
24.3873	1.33	24.3873	1.55137	24.3873	0.837	24.3873	0.504	24.3873	0.247	24.3873	0.106	24.3873	0.8	24.3873	1.148
24.4116	1.433	24.4116	0.63315	24.4116	0.483	24.4116	0.293	24.4116	-0.041	24.4116	0.06	24.4116	0.758	24.4116	1.491
24.4359	1.474	24.4359	0.36393	24.4359	0.325	24.4359	0.453	24.4359	0.269	24.4359	-0.007	24.4359	1.119	24.4359	3.164
24.4602	1.371	24.4602	0.09471	24.4602	0.065	24.4602	0.056	24.4602	-0.018	24.4602	0.152	24.4602	0.809	24.4602	3.61
24.4846	1.412	24.4846	0.08344	24.4846	0.062	24.4846	0.072	24.4846	0.024	24.4846	0.384	24.4846	0.581	24.4846	3.221
24.5089	1.433	24.5089	0.09322	24.5089	0.173	24.5089	0.16	24.5089	-0.026	24.5089	0.07	24.5089	0.581	24.5089	2.255
24.5332	1.464	24.5332	0	24.5332	0.005	24.5332	0.063	24.5332	0.089	24.5332	0.436	24.5332	0.581	24.5332	1.773
24.5575	1.464	24.5575	0.01258	24.5575	0.044	24.5575	-0.2	24.5575	0.08	24.5575	0.359	24.5575	0.55	24.5575	1.219
24.5819	1.443	24.5819	0.14917	24.5819	0.103	24.5819	0.033	24.5819	-0.115	24.5819	0.416	24.5819	0.477	24.5819	0.552
24.6062	1.454	24.6062	0.05875	24.6062	0.059	24.6062	0.039	24.6062	0.114	24.6062	0.339	24.6062	0.075	24.6062	0.782
24.6305	1.588	24.6305	0.07133	24.6305	-0.118	24.6305	0.034	24.6305	-0.039	24.6305	0.293	24.6305	0.24	24.6305	1.095
24.6548	1.433	24.6548	-0.08008	24.6548	-0.063	24.6548	0.185	24.6548	-0.15	24.6548	0.267	24.6548	0.189	24.6548	0.902
24.6792	1.526	24.6792	0.06651	24.6792	-0.079	24.6792	-0.026	24.6792	0.099	24.6792	-0.037	24.6792	0.003	24.6792	0.627
24.7035	1.588	24.7035	-0.18891	24.7035	-0.044	24.7035	-0.04	24.7035	0.008	24.7035	-0.082	24.7035	-0.038	24.7035	0.61
24.7278	1.505	24.7278	-0.15533	24.7278	-0.06	24.7278	-0.065	24.7278	-0.185	24.7278	0.202	24.7278	0.138	24.7278	0.17
24.7521	1.722	24.7521	-0.23475	24.7521	0.172	24.7521	-0.028	24.7521	0.023	24.7521	0.29	24.7521	-0.171	24.7521	-0.012
24.7764	1.588	24.7764	-0.27317	24.7764	0.228	24.7764	-0.084	24.7764	-0.222	24.7764	0.038	24.7764	-0.067	24.7764	0.002
24.8008	1.794	24.8008	-0.05458	24.8008	0.831	24.8008	-0.108	24.8008	-0.022	24.8008	-0.152	24.8008	-0.056	24.8008	-0.211
24.8251	1.691	24.8251	-0.155	24.8251	0.784	24.8251	-0.008	24.8251	0.024	24.8251	0.101	24.8251	0.264	24.8251	0.008
24.8494	1.629	24.8494	-0.22442	24.8494	0.696	24.8494	0.299	24.8494	-0.034	24.8494	-0.13	24.8494	0.224	24.8494	-0.123
24.8737	1.856	24.8737	0.10817	24.8737	1.103	24.8737	0.399	24.8737	0.259	24.8737	0	24.8737	-0.105	24.8737	-0.037
24.8981	1.897	24.8981	-0.11624	24.8981	0.737	24.8981	0.531	24.8981	0.645	24.8981	0.078	24.8981	0.081	24.8981	0.048
24.9224	1.722	24.9224	0.12334	24.9224	0.639	24.9224	0.817	24.9224	0.464	24.9224	-0.143	24.9224	-0.258	24.9224	0.433
24.9467	1.732	24.9467	0.07392	24.9467	0.614	24.9467	1.371	24.9467	0.345	24.9467	0.039	24.9467	-0.089	24.9467	0.508
24.971	1.784	24.971	0.0665	24.971	0.506	24.971	1.492	24.971	0.154	24.971	-0.079	24.971	0.151	24.971	0.553
24.9954	1.897	24.9954	0.31709	24.9954	0.377	24.9954	1.614	24.9954	-0.026	24.9954	-0.268	24.9954	-0.062	24.9954	0.68
25.0197	1.948	25.0197	0.38067	25.0197	0.145	25.0197	1.642	25.0197	0.051	25.0197	-0.054	25.0197	0.148	25.0197	0.714
25.044	1.866	25.044	0.24925	25.044	0.316	25.044	1.589	25.044	0.231	25.044	-0.129	25.044	0.141	25.044	0.728
25.0683	1.691	25.0683	0.40683	25.0683	0.188	25.0683	1.37	25.0683	0.288	25.0683	-0.142	25.0683	-0.113	25.0683	0.907
25.0926	1.67	25.0926	0.48142	25.0926	0.039	25.0926	1.121	25.0926	0.283	25.0926	0.175	25.0926	-0.161	25.0926	1.333
25.117	2.021	25.117	0.64901	25.117	0.179	25.117	0.696	25.117	0.34	25.117	0.06	25.117	0.152	25.117	1.46
25.1413	1.897	25.1413	0.76559	25.1413	-0.001	25.1413	0.261	25.1413	0.263	25.1413	-0.324	25.1413	0.053	25.1413	1.072
25.1656	2.113	25.1656	1.21117	25.1656	0.16	25.1656	0.167	25.1656	0.176	25.1656	0.21	25.1656	-0.067	25.1656	1.261
25.1899	1.773	25.1899	1.25475	25.1899	0.362	25.1899	-0.124	25.1899	0.079	25.1899	-0.071	25.1899	-0.124	25.1899	0.781
25.2143	2.01	25.2143	1.21634	25.2143	0.286	25.2143	-0.053	25.2143	-0.049	25.2143	0.071	25.2143	0.23	25.2143	0.259
25.2386	1.794	25.2386	0.89892	25.2386	-0.089	25.2386	-0.086	25.2386	-0.074	25.2386	-0.085	25.2386	0.09	25.2386	0.036
25.2629	2.093	25.2629	0.9015	25.2629	0.082	25.2629	-0.118	25.2629	-0.325	25.2629	-0.015	25.2629	-0.091	25.2629	0.267
25.2872	2.041	25.2872	0.46108	25.2872	0.315	25.2872	0.054	25.2872	0.135	25.2872	-0.089	25.2872	-0.107	25.2872	-0.09
25.3116	2.124	25.3116	-0.06232	25.3116	-0.183	25.3116	0.082	25.3116	-0.096	25.3116	0.074	25.3116	0.062	25.3116	0.079
25.3359	1.866	25.3359	-0.27574	25.3359	-0.074	25.3359	0.213	25.3359	-0.069	25.3359	-0.021	25.3359	-0.129	25.3359	-0.051
25.3602	1.753	25.3602	-0.09816	25.3602	0.057	25.3602	0.2	25.3602	0.01	25.3602	0.039	25.3602	-0.083	25.3602	-0.118
25.3845	1.948	25.3845	-0.08558	25.3845	0.105	25.3845	0.713	25.3845	0.213	25.3845	-0.035	25.3845	0.211	25.3845	-0.145
25.4088	1.608	25.4088	0	25.4088	-0.187	25.4088	0.37	25.4088	0.529	25.4088	-0.037	25.4088	0.112	25.4088	-0.105
25.4332	1.784	25.4332	-0.14132	25.4332	-0.046	25.4332	0.522	25.4332	0.649	25.4332	0.003	25.4332	-0.079	25.4332	-0.034
25.4575	1.856	25.4575	-0.04452	25.4575	0.105	25.4575	0.592	25.4575	0.388	25.4575	0.187	25.4575	-0.001	25.4575	0.027
25.4818	1.845	25.4818	-0.06173	25.4818	0.267	25.4818	0.909	25.4818	0.365	25.4818	0.103	25.4818	0.055	25.4818	-0.026
25.5061	1.887	25.5061	0.16906	25.5061	0.439	25.5061	0.917	25.5061	0.351	25.5061	0.091	25.5061	-0.197	25.5061	0.623
25.5305	1.887	25.5305	0.24475	25.5305	0.344	25.5305	0.863	25.5305	0.204	25.5305	0.265	25.5305	0.004	25.5305	0.581
25.5548	2.186	25.5548	0.17654	25.5548	0.361	25.5548	0.933	25.5548	0.14	25.5548	-0.169	25.5548	0.247	25.5548	1.065
25.5791	2.113	25.5791	0.24234	25.5791	0.101	25.5791	0.9	25.5791	0.189	25.5791	0.108	25.5791	0.056	25.5791	0.744
25.6034	2.093	25.6034	0.11213	25.6034	0.222	25.6034	0.713	25.6034	0.392	25.6034	-0.038	25.6034	0.175	25.6034	0.826
25.6278	2.113	25.6278	0.38381	25.6278	0.106	25.6278	0.711	25.6278	0.163	25.6278	0.208	25.6278	0.181	25.6278	0.454
25.6521	2.33	25.6521	0.09861	25.6521	0.124	25.6521	0.987	25.6521	0.357	25.6521	0.104	25.6521	-0.143	25.6521	0.423
25.6764	2.495	25.6764	0.5244	25.6764	0.091	25.6764	1.233	25.6764	0.169	25.6764	-0.011	25.6764	0.182	25.6764	0.474
25.7007	2.938	25.7007	0.50819	25.7007	0.222	25.7007	0.932	25.7007	0.115	25.7007	0.122	25.7007	0.044	25.7007	0.278
25.725	2.773	25.725	0.36699	25.725	0.23	25.725	1.291	25.725	0.134	25.725	0.008	25.725	0.04	25.725	-0.042
25.7494	2.526	25.7494	0.40167	25.7494	0.197	25.7494	1.022	25.7494	-0.043	25.7494	0.048	25.7494	0.025	25.7494	0.225
25.7737	2.546	25.7737	0.26147	25.7737	0.36	25.7737	1.876	25.7737	0.058	25.7737	-0.035	25.7737	0.093	25.7737	0.101
25.798	2.814	25.798	-0.09574	25.798	0.739	25.798	1.421	25.798	-0.16	25.798	0.294	25.798	0.327	25.798	0.153
25.8223	2.588	25.8223	0.18605	25.8223	1.088	25.8223	1.11	25.8223	-0.05	25.8223	0.077	25.8223	0.488	25.8223	0.173
25.8467	2.722	25.8467	0.19974	25.8467	1.643	25.8467	0.923	25.8467	0.081	25.8467	0.148	25.8467	0.597	25.8467	0.225
25.871	2.722	25.871	0.32753	25.871	1.641	25.871	0.427	25.871	-0.077	25.871	0.147	25.871	0.81	25.871	-0.002
25.8953	2.34	25.8953	0.08432	25.8953	1.237	25.8953	0.384	25.8953	-0.008	25.8953	0.301	25.8953	0.528	25.8953	-0.198
25.9196	2.784	25.9196	0.23212	25.9196	1.256	25.9196	0.146	25.9196	0.103	25.9196	0.187	25.9196	0.628	25.9196	0.04
25.944	2.567	25.944	0.2978	25.944	1.09	25.944	0.341	25.944	-0.21	25.944	-0.102	25.944	0.717	25.944	-0.074
25.9683	2.876	25.9683	-0.0804	25.9683	0.583	25.9683	0.02	25.9683	0.097	25.9683	0.073	25.9683	0.621	25.9683	-0.104
25.9926	2.825	25.9926	0.02639	25.9926	0.324	25.9926	0.339	25.9926	0.228	25.9926	0.031	25.9926	0.731	25.9926	0.174
26.0169	3.392	26.0169	-0.18582	26.0169	0.086	26.0169	0.349	26.0169	0.288	26.0169	0.124	26.0169	0.491	26.0169	0.051
26.0412	3.495	26.0412	-0.20302	26.0412	0.291	26.0412	0.554	26.0412	0.141	26.0412	0.175	26.0412	0.57	26.0412	-0.155
26.0656	3.33	26.0656	-0.09634	26.0656	0.228	26.0656	0.275	26.0656	-0.109	26.0656	0.226	26.0656	0.515	26.0656	-0.134
26.0899	3.155	26.0899	-0.12355	26.0899	0.134	26.0899	0.233	26.0899	0.229	26.0899	0.009	26.0899	0.791	26.0899	-0.001
26.1142	3.577	26.1142	-0.01675	26.1142	0.412	26.1142	0.305	26.1142	0.258	26.1142	0.082	26.1142	0.108	26.1142	-0.011
26.1385	2.959	26.1385	-0.08496	26.1385	0.174	26.1385	0.139	26.1385	0.102	26.1385	0.411	26.1385	0.507	26.1385	0.236
26.1629	2.887	26.1629	0.12473	26.1629	0.41	26.1629	0.231	26.1629	0.522	26.1629	0.205	26.1629	0.906	26.1629	-0.022
26.1872	2.845	26.1872	-0.11948	26.1872	0.059	26.1872	0.252	26.1872	0.459	26.1872	0.628	26.1872	0.347	26.1872	0.38
26.2115	3.031	26.2115	0.17418	26.2115	0.172	26.2115	0.416	26.2115	0.055	26.2115	0.205	26.2115	0.18	26.2115	0.143
26.2358	2.639	26.2358	0.2858	26.2358	0.481	26.2358	0.478	26.2358	0.497	26.2358	0.329	26.2358	0.249	26.2358	0.637
26.2602	2.845	26.2602	0.24224	26.2602	0.305	26.2602	0.014	26.2602	0.217	26.2602	0.432	26.2602	0.165	26.2602	0.452
26.2845	2.918	26.2845	0.24986	26.2845	0.398	26.2845	0.519	26.2845	0.628	26.2845	0.494	26.2845	0.482	26.2845	0.998
26.3088	2.969	26.3088	0.12449	26.3088	0.387	26.3088	0.271	26.3088	0.483	26.3088	0.577	26.3088	0.542	26.3088	0.514
26.3331	2.454	26.3331	-0.10489	26.3331	0.511	26.3331	0.344	26.3331	0.637	26.3331	0.835	26.3331	0.54	26.3331	0.865
26.3574	2.948	26.3574	0.03773	26.3574	0.573	26.3574	0.323	26.3574	0.502	26.3574	0.567	26.3574	0.548	26.3574	1.102
26.3818	2.856	26.3818	-0.12983	26.3818	0.49	26.3818	0.416	26.3818	0.686	26.3818	0.929	26.3818	0.721	26.3818	0.762
26.4061	3.031	26.4061	0.3118	26.4061	1.129	26.4061	0.416	26.4061	0.675	26.4061	1.599	26.4061	0.895	26.4061	0.876
26.4304	3.371	26.4304	0.31942	26.4304	1.016	26.4304	0.664	26.4304	0.829	26.4304	1.517	26.4304	1.027	26.4304	1.196
26.4547	3.052	26.4547	0.41004	26.4547	0.79	26.4547	0.242	26.4547	0.747	26.4547	1.755	26.4547	1.809	26.4547	1.784
26.4791	2.814	26.4791	-0.24152	26.4791	1.069	26.4791	0.531	26.4791	1.344	26.4791	1.57	26.4791	2.478	26.4791	3.063
26.5034	3.299	26.5034	0.31311	26.5034	0.987	26.5034	0.593	26.5034	0.993	26.5034	1.303	26.5034	2.755	26.5034	2.621
26.5277	3.258	26.5277	-0.12227	26.5277	1.235	26.5277	0.419	26.5277	0.787	26.5277	1.005	26.5277	3.465	26.5277	2.436
26.552	2.907	26.552	-0.01065	26.552	1.318	26.552	0.543	26.552	0.643	26.552	0.954	26.552	2.577	26.552	1.89
26.5764	2.938	26.5764	0.41979	26.5764	1.824	26.5764	0.719	26.5764	0.56	26.5764	0.821	26.5764	2.462	26.5764	1.262
26.6007	3.485	26.6007	-0.15959	26.6007	2.422	26.6007	0.967	26.6007	0.128	26.6007	0.76	26.6007	1.77	26.6007	0.954
26.625	3.155	26.625	0.11704	26.625	2.413	26.625	0.947	26.625	0.19	26.625	0.709	26.625	1.739	26.625	0.976
26.6493	2.876	26.6493	0.04266	26.6493	3.837	26.6493	0.649	26.6493	0.675	26.6493	0.752	26.6493	1.284	26.6493	0.348
26.6736	3.01	26.6736	0.13328	26.6736	5.281	26.6736	0.733	26.6736	0.459	26.6736	0.856	26.6736	1.335	26.6736	0.462
26.698	3.546	26.698	-0.18928	26.698	5.447	26.698	1.053	26.698	0.573	26.698	0.785	26.698	0.963	26.698	0.33
26.7223	2.938	26.7223	0.07735	26.7223	5.015	26.7223	1.024	26.7223	0.502	26.7223	0.528	26.7223	1.23	26.7223	0.351
26.7466	3.278	26.7466	-0.10003	26.7466	5.419	26.7466	1.819	26.7466	0.441	26.7466	0.787	26.7466	0.518	26.7466	0.281
26.7709	3.485	26.7709	0.13459	26.7709	5.245	26.7709	2.748	26.7709	0.493	26.7709	0.458	26.7709	1.085	26.7709	0.529
26.7953	3.68	26.7953	0.56503	26.7953	3.731	26.7953	2.832	26.7953	0.69	26.7953	0.614	26.7953	1.837	26.7953	0.366
26.8196	3.155	26.8196	0.85166	26.8196	3.258	26.8196	2.421	26.8196	0.372	26.8196	0.533	26.8196	2.507	26.8196	0.893
26.8439	3.546	26.8439	0.72628	26.8439	2.415	26.8439	1.67	26.8439	0.641	26.8439	0.7	26.8439	2.363	26.8439	0.843
26.8682	3.247	26.8682	0.3529	26.8682	1.283	26.8682	1.805	26.8682	0.777	26.8682	0.794	26.8682	1.847	26.8682	0.814
26.8926	3.289	26.8926	0.29834	26.8926	1.037	26.8926	1.322	26.8926	1.387	26.8926	0.528	26.8926	1.661	26.8926	0.651
26.9169	3.082	26.9169	0.32796	26.9169	0.606	26.9169	0.86	26.9169	1.729	26.9169	0.983	26.9169	1.424	26.9169	0.797
26.9412	3.155	26.9412	-0.07641	26.9412	0.845	26.9412	0.985	26.9412	1.978	26.9412	1.263	26.9412	0.919	26.9412	1.077
26.9655	3.32	26.9655	-0.05779	26.9655	0.548	26.9655	0.946	26.9655	2.505	26.9655	0.924	26.9655	0.631	26.9655	0.893
26.9899	3.577	26.9899	-0.04035	26.9899	0.643	26.9899	0.762	26.9899	2.26	26.9899	1.04	26.9899	1.6	26.9899	0.874
27.0142	3.464	27.0142	-0.06273	27.0142	0.903	27.0142	0.929	27.0142	2.499	27.0142	0.732	27.0142	0.89	27.0142	1.01
27.0385	3.567	27.0385	0.0589	27.0385	0.906	27.0385	1.034	27.0385	2.409	27.0385	0.765	27.0385	0.746	27.0385	0.878
27.0628	3.464	27.0628	0.09752	27.0628	0.578	27.0628	0.892	27.0628	2.679	27.0628	0.901	27.0628	0.808	27.0628	0.551
27.0871	3.588	27.0871	0.35314	27.0871	0.808	27.0871	1.121	27.0871	1.826	27.0871	0.862	27.0871	0.902	27.0871	0.749
27.1115	3.526	27.1115	-0.62842	27.1115	0.965	27.1115	0.721	27.1115	1.849	27.1115	0.843	27.1115	0.779	27.1115	0.318
27.1358	3.856	27.1358	-0.76379	27.1358	0.761	27.1358	1.249	27.1358	1.615	27.1358	0.701	27.1358	0.738	27.1358	0.228
27.1601	3.711	27.1601	-0.62217	27.1601	0.61	27.1601	1.221	27.1601	1.525	27.1601	0.744	27.1601	0.956	27.1601	0.374
27.1844	3.979	27.1844	-0.40755	27.1844	0.819	27.1844	1.43	27.1844	0.786	27.1844	0.571	27.1844	1.06	27.1844	0.284
27.2088	3.68	27.2088	-0.13377	27.2088	0.574	27.2088	1.525	27.2088	0.469	27.2088	0.522	27.2088	1.216	27.2088	0.482
27.2331	4.196	27.2331	0.03473	27.2331	0.536	27.2331	1.837	27.2331	0.462	27.2331	0.658	27.2331	1.145	27.2331	-0.041
27.2574	4.052	27.2574	0.31724	27.2574	0.611	27.2574	1.375	27.2574	0.672	27.2574	0.362	27.2574	1.115	27.2574	0.106
27.2817	3.856	27.2817	0.28974	27.2817	0.718	27.2817	1.11	27.2817	0.572	27.2817	0.323	27.2817	1.343	27.2817	-0.056
27.3061	3.99	27.3061	0.01525	27.3061	1.01	27.3061	0.948	27.3061	0.359	27.3061	0.841	27.3061	1.005	27.3061	0.245
27.3304	4.021	27.3304	0.31676	27.3304	1.621	27.3304	0.807	27.3304	0.816	27.3304	0.637	27.3304	1.522	27.3304	0.434
27.3547	4.01	27.3547	0.40326	27.3547	1.831	27.3547	0.387	27.3547	0.789	27.3547	0.392	27.3547	1.791	27.3547	0.066
27.379	3.742	27.379	0.45876	27.379	1.195	27.379	0.988	27.379	0.752	27.379	0.416	27.379	1.566	27.379	0.316
27.4033	3.753	27.4033	-0.07474	27.4033	1.189	27.4033	0.599	27.4033	1.014	27.4033	0.356	27.4033	1.579	27.4033	0.164
27.4277	3.691	27.4277	-0.15322	27.4277	0.77	27.4277	1.272	27.4277	1.492	27.4277	0.668	27.4277	1.983	27.4277	0.59
27.452	3.464	27.452	0.44828	27.452	0.299	27.452	1.203	27.452	4.929	27.452	0.805	27.452	3.912	27.452	0.779
27.4763	3.454	27.4763	0.98779	27.4763	0.654	27.4763	1.32	27.4763	5.284	27.4763	1.715	27.4763	10.513	27.4763	0.504
27.5006	3.381	27.5006	1.31129	27.5006	0.895	27.5006	1.622	27.5006	4.629	27.5006	2.275	27.5006	24.236	27.5006	1.28
27.525	4.031	27.525	2.46881	27.525	0.848	27.525	1.069	27.525	4.52	27.525	3.649	27.525	51.187	27.525	1.5
27.5493	3.825	27.5493	2.94631	27.5493	0.862	27.5493	1.155	27.5493	3.947	27.5493	4.405	27.5493	24.623	27.5493	1.936
27.5736	3.866	27.5736	2.49681	27.5736	0.897	27.5736	0.87	27.5736	3.189	27.5736	4.243	27.5736	17.058	27.5736	2.135
27.5979	3.711	27.5979	3.53131	27.5979	1.314	27.5979	0.76	27.5979	2.431	27.5979	3.07	27.5979	27.658	27.5979	2.17
27.6223	3.454	27.6223	3.84383	27.6223	1.514	27.6223	0.65	27.6223	2.55	27.6223	2.837	27.6223	11.104	27.6223	2.328
27.6466	3.557	27.6466	3.65133	27.6466	1.498	27.6466	0.561	27.6466	2.627	27.6466	1.716	27.6466	4.385	27.6466	2.517
27.6709	3.732	27.6709	3.15984	27.6709	1.761	27.6709	0.751	27.6709	2.127	27.6709	1.42	27.6709	3.698	27.6709	2.572
27.6952	3.99	27.6952	3.00934	27.6952	1.734	27.6952	0.816	27.6952	1.978	27.6952	1.114	27.6952	3.566	27.6952	3.772
27.7195	4.639	27.7195	3.46584	27.7195	1.358	27.7195	0.501	27.7195	1.89	27.7195	1.365	27.7195	3.487	27.7195	3.858
27.7439	6.794	27.7439	4.26336	27.7439	0.888	27.7439	0.629	27.7439	1.401	27.7439	2.008	27.7439	2.676	27.7439	2.893
27.7682	12.165	27.7682	5.78286	27.7682	1.079	27.7682	0.354	27.7682	1.479	27.7682	2.661	27.7682	2.411	27.7682	2.248
27.7925	16.165	27.7925	11.5794	27.7925	2.476	27.7925	0.317	27.7925	1.877	27.7925	3.334	27.7925	2.404	27.7925	2.004
27.8168	14.99	27.8168	16.4489	27.8168	3.728	27.8168	0.229	27.8168	1.604	27.8168	3.276	27.8168	2.036	27.8168	1.235
27.8412	14.794	27.8412	20.8964	27.8412	6.146	27.8412	0.573	27.8412	1.352	27.8412	3.383	27.8412	1.782	27.8412	0.528
27.8655	14.742	27.8655	23.6109	27.8655	7.883	27.8655	0.897	27.8655	2.637	27.8655	3.531	27.8655	1.332	27.8655	0.553
27.8898	10.856	27.8898	25.0474	27.8898	8.579	27.8898	0.283	27.8898	4.375	27.8898	3.782	27.8898	0.913	27.8898	0.65
27.9141	8.485	27.9141	26.5869	27.9141	7.873	27.9141	0.535	27.9141	5.98	27.9141	2.683	27.9141	1.143	27.9141	0.778
27.9385	8.278	27.9385	22.4044	27.9385	6.755	27.9385	0.354	27.9385	5.058	27.9385	1.883	27.9385	0.92	27.9385	0.916
27.9628	8.155	27.9628	16.7179	27.9628	4.709	27.9628	0.699	27.9628	3.498	27.9628	2.495	27.9628	0.78	27.9628	0.498
27.9871	9.876	27.9871	12.9684	27.9871	3.344	27.9871	0.662	27.9871	2.917	27.9871	3.891	27.9871	0.763	27.9871	0.678
28.0114	13.948	28.0114	8.13692	28.0114	1.979	28.0114	0.389	28.0114	2.46	28.0114	5.833	28.0114	0.324	28.0114	0.991
28.0357	22.598	28.0357	4.55342	28.0357	1.263	28.0357	0.487	28.0357	0.632	28.0357	3.074	28.0357	0.74	28.0357	1.584
28.0601	23	28.0601	1.96894	28.0601	0.733	28.0601	0.461	28.0601	0.618	28.0601	2.48	28.0601	0.878	28.0601	0.64
28.0844	14.32	28.0844	1.51844	28.0844	0.667	28.0844	0.27	28.0844	0.43	28.0844	2.598	28.0844	0.914	28.0844	0.954
28.1087	13.247	28.1087	1.05794	28.1087	0.539	28.1087	0.048	28.1087	0.303	28.1087	1.612	28.1087	0.557	28.1087	0.794
28.133	11.825	28.133	0.58744	28.133	0.617	28.133	0.476	28.133	0.053	28.133	0.524	28.133	0.696	28.133	0.613
28.1574	6.546	28.1574	0.46696	28.1574	0.232	28.1574	1.151	28.1574	-0.064	28.1574	0.384	28.1574	1.185	28.1574	0.927
28.1817	4.371	28.1817	-0.07554	28.1817	0.537	28.1817	0.527	28.1817	0.119	28.1817	0.275	28.1817	1.056	28.1817	0.644
28.206	3.68	28.206	0.52597	28.206	0.76	28.206	0.461	28.206	0.488	28.206	0.537	28.206	1.741	28.206	0.979
28.2303	3.567	28.2303	0.04447	28.2303	0.21	28.2303	0.971	28.2303	0.424	28.2303	0.49	28.2303	1.643	28.2303	1.159
28.2547	3.814	28.2547	0.12098	28.2547	0.114	28.2547	0.997	28.2547	0.195	28.2547	0.402	28.2547	1.514	28.2547	0.968
28.279	3.722	28.279	0.59807	28.279	0.43	28.279	1.219	28.279	0.275	28.279	0.613	28.279	1.405	28.279	0.654
28.3033	3.32	28.3033	-0.1329	28.3033	0.375	28.3033	0.905	28.3033	0.221	28.3033	0.658	28.3033	0.823	28.3033	0.742
28.3276	3.474	28.3276	0.24913	28.3276	0.372	28.3276	1.138	28.3276	0.343	28.3276	0.601	28.3276	0.787	28.3276	0.562
28.3519	3.34	28.3519	0.16717	28.3519	0.76	28.3519	1.071	28.3519	0.609	28.3519	0.39	28.3519	1.246	28.3519	0.722
28.3763	3.515	28.3763	0.53937	28.3763	0.643	28.3763	0.737	28.3763	0.68	28.3763	0.714	28.3763	1.107	28.3763	0.614
28.4006	3.67	28.4006	-0.0576	28.4006	0.63	28.4006	0.877	28.4006	0.874	28.4006	0.781	28.4006	1.298	28.4006	0.063
28.4249	3.773	28.4249	-0.16957	28.4249	0.606	28.4249	0.904	28.4249	0.81	28.4249	0.559	28.4249	1.283	28.4249	0.759
28.4492	3.515	28.4492	0.11946	28.4492	1.222	28.4492	1.322	28.4492	0.922	28.4492	0.543	28.4492	1.309	28.4492	0.899
28.4736	3.309	28.4736	0.18267	28.4736	1.848	28.4736	1.864	28.4736	1.426	28.4736	0.528	28.4736	1.449	28.4736	0.77
28.4979	3.722	28.4979	-0.3113	28.4979	2.206	28.4979	3.241	28.4979	1.126	28.4979	0.687	28.4979	1.31	28.4979	0.797
28.5222	3.567	28.5222	0.27673	28.5222	2.317	28.5222	5.609	28.5222	1.342	28.5222	0.538	28.5222	2.347	28.5222	0.576
28.5465	3.33	28.5465	0.01976	28.5465	2.314	28.5465	5.955	28.5465	2.382	28.5465	0.419	28.5465	3.868	28.5465	0.984
28.5709	3.753	28.5709	0.08296	28.5709	2.332	28.5709	6.291	28.5709	2.804	28.5709	0.476	28.5709	1.936	28.5709	0.897
28.5952	3.753	28.5952	0.61899	28.5952	1.866	28.5952	6.205	28.5952	4.03	28.5952	0.461	28.5952	1.417	28.5952	0.769
28.6195	3.237	28.6195	0.28002	28.6195	1.884	28.6195	5.583	28.6195	6.813	28.6195	0.59	28.6195	1.289	28.6195	0.6
28.6438	3.804	28.6438	0.31205	28.6438	1.057	28.6438	5.569	28.6438	8.977	28.6438	0.894	28.6438	0.739	28.6438	0.534
28.6681	3.505	28.6681	0.29209	28.6681	0.9	28.6681	3.792	28.6681	6.709	28.6681	1.044	28.6681	0.209	28.6681	0.448
28.6925	4.206	28.6925	0.31329	28.6925	0.692	28.6925	2.829	28.6925	4.698	28.6925	0.926	28.6925	0.03	28.6925	0.536
28.7168	3.753	28.7168	-0.09768	28.7168	0.453	28.7168	2.042	28.7168	4.842	28.7168	1.107	28.7168	0.078	28.7168	0.45
28.7411	3.969	28.7411	0.53135	28.7411	0.09	28.7411	1.183	28.7411	3.564	28.7411	0.741	28.7411	-0.101	28.7411	0.157
28.7654	3.804	28.7654	0.27438	28.7654	-0.128	28.7654	0.819	28.7654	1.306	28.7654	0.696	28.7654	0.225	28.7654	0.277
28.7898	4.103	28.7898	-0.07541	28.7898	0.015	28.7898	0.445	28.7898	1.492	28.7898	0.309	28.7898	-0.293	28.7898	0.645
28.8141	3.763	28.8141	0.57812	28.8141	0.044	28.8141	0.369	28.8141	0.822	28.8141	0.171	28.8141	0.229	28.8141	0.414
28.8384	3.186	28.8384	-0.07468	28.8384	0.115	28.8384	0.284	28.8384	0.359	28.8384	0.115	28.8384	-0.238	28.8384	0.514
28.8627	3.763	28.8627	-0.01747	28.8627	0.237	28.8627	0.188	28.8627	0.267	28.8627	0.255	28.8627	-0.076	28.8627	-0.16
28.8871	3.485	28.8871	0.22576	28.8871	0.194	28.8871	0.082	28.8871	0.144	28.8871	0.127	28.8871	0.405	28.8871	0.136
28.9114	3.485	28.9114	0.21197	28.9114	-0.024	28.9114	0.357	28.9114	0.01	28.9114	-0.011	28.9114	0.546	28.9114	0.194
28.9357	3.309	28.9357	0.26918	28.9357	-0.015	28.9357	0.127	28.9357	-0.03	28.9357	0.098	28.9357	-0.127	28.9357	0.273
28.96	3.412	28.96	0.24438	28.96	0.129	28.96	0.063	28.96	0.136	28.96	0.207	28.96	0.128	28.96	0.239
28.9843	3.433	28.9843	0.48759	28.9843	0.066	28.9843	0.225	28.9843	0.385	28.9843	0.213	28.9843	0.322	28.9843	0.019
29.0087	3.423	29.0087	0.82382	29.0087	0.219	29.0087	0.098	29.0087	0.479	29.0087	0.023	29.0087	0.34	29.0087	0.428
29.033	3.629	29.033	0.71703	29.033	0.085	29.033	0.116	29.033	0.098	29.033	0.442	29.033	0.007	29.033	0.497
29.0573	3.402	29.0573	0.75423	29.0573	-0.03	29.0573	-0.031	29.0573	-0.034	29.0573	-0.077	29.0573	0.005	29.0573	0.133
29.0816	3.495	29.0816	0.54344	29.0816	-0.164	29.0816	0.41	29.0816	0.205	29.0816	0.084	29.0816	-0.194	29.0816	0.161
29.106	3.557	29.106	0.40567	29.106	-0.146	29.106	0.264	29.106	0.361	29.106	0.018	29.106	0.382	29.106	0.292
29.1303	3.392	29.1303	0.32888	29.1303	0.047	29.1303	0.302	29.1303	0.084	29.1303	-0.017	29.1303	0.421	29.1303	0.743
29.1546	3.619	29.1546	-0.26191	29.1546	0.014	29.1546	-0.019	29.1546	0.066	29.1546	-0.052	29.1546	0.284	29.1546	0.668
29.1789	3.124	29.1789	0.01229	29.1789	-0.051	29.1789	0.401	29.1789	0.191	29.1789	-0.107	29.1789	0.427	29.1789	0.841
29.2033	3.237	29.2033	-0.28047	29.2033	0.163	29.2033	0.017	29.2033	0.224	29.2033	0.075	29.2033	0.239	29.2033	0.776
29.2276	3.144	29.2276	0.26173	29.2276	0.316	29.2276	0.242	29.2276	-0.083	29.2276	-0.114	29.2276	0.413	29.2276	1.217
29.2519	3.598	29.2519	-0.07306	29.2519	0.138	29.2519	0.034	29.2519	0.291	29.2519	0.099	29.2519	0.39	29.2519	1.812
29.2762	3.237	29.2762	0.15015	29.2762	0.167	29.2762	-0.184	29.2762	0.273	29.2762	0.085	29.2762	0.378	29.2762	1.655
29.3005	3.351	29.3005	0.01235	29.3005	0.031	29.3005	0.226	29.3005	0.121	29.3005	-0.155	29.3005	0.129	29.3005	1.312
29.3249	2.918	29.3249	0.09059	29.3249	-0.146	29.3249	-0.013	29.3249	0.381	29.3249	-0.015	29.3249	0.602	29.3249	1.135
29.3492	3.505	29.3492	0.23079	29.3492	-0.106	29.3492	-0.076	29.3492	0.456	29.3492	-0.008	29.3492	0.168	29.3492	1.019
29.3735	3.825	29.3735	0	29.3735	0.49	29.3735	0.211	29.3735	0.655	29.3735	0.36	29.3735	0.466	29.3735	0.151
29.3978	3.165	29.3978	0.37524	29.3978	0.416	29.3978	0.23	29.3978	0.936	29.3978	-0.086	29.3978	0.31	29.3978	1.087
29.4222	3.495	29.4222	0.0595	29.4222	0.435	29.4222	0.403	29.4222	0.3	29.4222	0.045	29.4222	-0.083	29.4222	0.26
29.4465	3.227	29.4465	0.36275	29.4465	0.289	29.4465	0.258	29.4465	0.613	29.4465	-0.216	29.4465	0.122	29.4465	0.361
29.4708	3.371	29.4708	0.72799	29.4708	0.319	29.4708	0.174	29.4708	0.75	29.4708	0.389	29.4708	0.358	29.4708	0.163
29.4951	3.227	29.4951	0.63923	29.4951	0.534	29.4951	0.389	29.4951	0.672	29.4951	0.097	29.4951	0.151	29.4951	-0.024
29.5195	3.495	29.5195	1.09749	29.5195	0.564	29.5195	0.47	29.5195	0.201	29.5195	0.063	29.5195	0.037	29.5195	0.015
29.5438	3.237	29.5438	1.06074	29.5438	0.583	29.5438	0.727	29.5438	0.236	29.5438	-0.135	29.5438	0.397	29.5438	0.116
29.5681	3.598	29.5681	1.11598	29.5681	0.871	29.5681	0.623	29.5681	0.415	29.5681	-0.334	29.5681	0.118	29.5681	0.228
29.5924	3.464	29.5924	0.98622	29.5924	1.2	29.5924	0.323	29.5924	-0.272	29.5924	-0.059	29.5924	0.087	29.5924	0.402
29.6167	3.031	29.6167	1.18647	29.6167	1.477	29.6167	0.569	29.6167	-0.185	29.6167	-0.082	29.6167	0.272	29.6167	0.524
29.6411	3.567	29.6411	1.40773	29.6411	1.126	29.6411	0.207	29.6411	0.275	29.6411	0.05	29.6411	0.076	29.6411	0.935
29.6654	3.134	29.6654	1.15397	29.6654	1.404	29.6654	0.093	29.6654	0.25	29.6654	-0.015	29.6654	-0.048	29.6654	0.273
29.6897	3.247	29.6897	2.09621	29.6897	0.795	29.6897	0.123	29.6897	0.164	29.6897	-0.203	29.6897	0.178	29.6897	1.323
29.714	3.639	29.714	3.62646	29.714	1.145	29.714	0.865	29.714	0.243	29.714	0.341	29.714	0.22	29.714	0.941
29.7384	3.381	29.7384	7.27972	29.7384	0.598	29.7384	1.05	29.7384	0.323	29.7384	0.06	29.7384	0.271	29.7384	1.321
29.7627	3.938	29.7627	9.27396	29.7627	0.505	29.7627	0.977	29.7627	0.227	29.7627	0.192	29.7627	-0.265	29.7627	1.216
29.787	3.557	29.787	10.8042	29.787	0.144	29.787	0.564	29.787	0.378	29.787	0.035	29.787	0.302	29.787	0.947
29.8113	3.536	29.8113	9.37545	29.8113	0.309	29.8113	0.502	29.8113	0.355	29.8113	0.074	29.8113	-0.058	29.8113	0.523
29.8357	3.454	29.8357	8.06971	29.8357	0.494	29.8357	0.543	29.8357	0.455	29.8357	0.175	29.8357	-0.017	29.8357	0.223
29.86	3.392	29.86	6.37295	29.86	0.102	29.86	0.47	29.86	1.019	29.86	0.368	29.86	0.097	29.86	0.264
29.8843	3.361	29.8843	3.93419	29.8843	0.01	29.8843	0.223	29.8843	1.058	29.8843	-0.005	29.8843	0.119	29.8843	0.52
29.9086	3.577	29.9086	2.54644	29.9086	0.134	29.9086	0.006	29.9086	0.364	29.9086	0.086	29.9086	0.15	29.9086	0.221
29.9329	3.371	29.9329	1.37568	29.9329	0.165	29.9329	0.068	29.9329	0.754	29.9329	0.197	29.9329	0.254	29.9329	0.158
29.9573	3.649	29.9573	1.20494	29.9573	0.011	29.9573	0.212	29.9573	0.659	29.9573	0.113	29.9573	-0.25	29.9573	0.147
29.9816	3.938	29.9816	0.85818	29.9816	0.176	29.9816	-0.159	29.9816	0.399	29.9816	0.234	29.9816	0.452	29.9816	0.012
30.0059	3.474	30.0059	0.90443	30.0059	0.424	30.0059	0.274	30.0059	0.417	30.0059	0.243	30.0059	0.02	30.0059	-0.215
30.0302	4.113	30.0302	0.77467	30.0302	0.043	30.0302	0.285	30.0302	0.498	30.0302	0.19	30.0302	0.103	30.0302	0.258
30.0546	3.773	30.0546	0.61393	30.0546	-0.09	30.0546	0.306	30.0546	0.238	30.0546	-0.039	30.0546	0.506	30.0546	0.454
30.0789	4.309	30.0789	0.89617	30.0789	0.323	30.0789	0.12	30.0789	0.597	30.0789	0.506	30.0789	0.734	30.0789	1.103
30.1032	3.918	30.1032	1.15842	30.1032	0.148	30.1032	0.502	30.1032	0.452	30.1032	0.092	30.1032	0.416	30.1032	0.762
30.1275	4.196	30.1275	0.78066	30.1275	0.438	30.1275	0.286	30.1275	0.512	30.1275	0.358	30.1275	0.376	30.1275	0.174
30.1519	3.948	30.1519	0.78492	30.1519	0.254	30.1519	0.328	30.1519	0.438	30.1519	0.233	30.1519	0.574	30.1519	0.535
30.1762	4.062	30.1762	0.94417	30.1762	0.399	30.1762	0.349	30.1762	0.334	30.1762	0.19	30.1762	0.266	30.1762	0.627
30.2005	4.072	30.2005	1.27841	30.2005	0.173	30.2005	0.484	30.2005	0.838	30.2005	0.807	30.2005	0.763	30.2005	0.112
30.2248	4.34	30.2248	1.02465	30.2248	0.278	30.2248	0.65	30.2248	0.858	30.2248	0.053	30.2248	0.352	30.2248	0.38
30.2492	4.186	30.2492	1.55491	30.2492	0.496	30.2492	0.331	30.2492	0.434	30.2492	-0.01	30.2492	0.467	30.2492	0.545
30.2735	3.773	30.2735	1.40416	30.2735	0.549	30.2735	0.486	30.2735	0.598	30.2735	0.422	30.2735	0.593	30.2735	0.298
30.2978	3.876	30.2978	1.5734	30.2978	0.457	30.2978	0.075	30.2978	0.154	30.2978	0.194	30.2978	0.441	30.2978	0.679
30.3221	4.186	30.3221	1.75264	30.3221	0.439	30.3221	0.066	30.3221	0.494	30.3221	0.151	30.3221	-0.238	30.3221	0.525
30.3464	3.938	30.3464	1.51988	30.3464	0.358	30.3464	0.16	30.3464	0.493	30.3464	0.357	30.3464	0.043	30.3464	0.288
30.3708	3.567	30.3708	1.76115	30.3708	0.153	30.3708	-0.014	30.3708	0.338	30.3708	0.49	30.3708	-0.14	30.3708	0.566
30.3951	3.835	30.3951	1.40539	30.3951	0.31	30.3951	0.245	30.3951	0.049	30.3951	0.684	30.3951	0.089	30.3951	0.443
30.4194	3.732	30.4194	1.47063	30.4194	0.023	30.4194	0.452	30.4194	0.204	30.4194	0.519	30.4194	-0.022	30.4194	0.093
30.4437	3.773	30.4437	1.11488	30.4437	0.541	30.4437	0.319	30.4437	-0.157	30.4437	0.59	30.4437	0.187	30.4437	0.702
30.4681	3.588	30.4681	0.64414	30.4681	0.213	30.4681	0.671	30.4681	0.111	30.4681	1.352	30.4681	-0.037	30.4681	0.424
30.4924	3.763	30.4924	0.70038	30.4924	0.391	30.4924	0.92	30.4924	-0.084	30.4924	1.64	30.4924	0.048	30.4924	0.559
30.5167	3.433	30.5167	0.79762	30.5167	0.331	30.5167	0.726	30.5167	0.133	30.5167	1.526	30.5167	0.113	30.5167	0.446
30.541	4	30.541	0.97687	30.541	0.158	30.541	1.15	30.541	0.226	30.541	0.999	30.541	0.085	30.541	0.333
30.5654	4.031	30.5654	1.16613	30.5654	-0.097	30.5654	1.4	30.5654	0.092	30.5654	0.73	30.5654	-0.335	30.5654	0.695
30.5897	4.072	30.5897	1.01637	30.5897	0.462	30.5897	1.164	30.5897	0.392	30.5897	1.08	30.5897	-0.08	30.5897	0.273
30.614	3.948	30.614	1.13361	30.614	0.001	30.614	1.929	30.614	0.568	30.614	0.111	30.614	0.02	30.614	0.264
30.6383	4.165	30.6383	0.83886	30.6383	0.385	30.6383	1.797	30.6383	0.672	30.6383	0.523	30.6383	-0.045	30.6383	-0.106
30.6626	3.99	30.6626	0.9461	30.6626	0.326	30.6626	1.582	30.6626	0.735	30.6626	0.069	30.6626	0.045	30.6626	0.122
30.687	4.082	30.687	0.52836	30.687	0.546	30.687	1.636	30.687	1.097	30.687	0.048	30.687	0.506	30.687	0.38
30.7113	3.887	30.7113	0.6766	30.7113	0.683	30.7113	1.751	30.7113	1.5	30.7113	0.645	30.7113	0.348	30.7113	0.031
30.7356	3.938	30.7356	0.61885	30.7356	0.16	30.7356	0.558	30.7356	1.337	30.7356	0.253	30.7356	0.707	30.7356	0.187
30.7599	3.938	30.7599	0.45809	30.7599	1.153	30.7599	1.086	30.7599	2.338	30.7599	0.408	30.7599	0.075	30.7599	0.446
30.7843	3.495	30.7843	0.68935	30.7843	1.063	30.7843	0.851	30.7843	3.319	30.7843	0.263	30.7843	-0.123	30.7843	0.21
30.8086	3.536	30.8086	0.18859	30.8086	1.005	30.8086	0.915	30.8086	4.341	30.8086	-0.005	30.8086	0.153	30.8086	-0.077
30.8329	3.608	30.8329	0.21284	30.8329	0.833	30.8329	0.578	30.8329	5.436	30.8329	0.109	30.8329	0.656	30.8329	0.028
30.8572	3.856	30.8572	0.21708	30.8572	0.734	30.8572	0.24	30.8572	4.737	30.8572	0.222	30.8572	0.282	30.8572	0.122
30.8816	3.959	30.8816	0.41734	30.8816	0.5	30.8816	0.067	30.8816	4.976	30.8816	-0.17	30.8816	0.548	30.8816	-0.247
30.9059	3.722	30.9059	0.79258	30.9059	0.504	30.9059	0.317	30.9059	4.483	30.9059	-0.2	30.9059	0.319	30.9059	-0.115
30.9302	3.763	30.9302	1.05483	30.9302	0.157	30.9302	-0.03	30.9302	3.146	30.9302	0.161	30.9302	0.421	30.9302	0.09
30.9545	3.691	30.9545	1.22407	30.9545	0.274	30.9545	-0.161	30.9545	2.746	30.9545	-0.035	30.9545	0.759	30.9545	0.067
30.9788	3.68	30.9788	1.02231	30.9788	0.082	30.9788	0.089	30.9788	2.192	30.9788	0.11	30.9788	0.613	30.9788	-0.13
31.0032	3.443	31.0032	1.10857	31.0032	0.21	31.0032	0.339	31.0032	1.71	31.0032	0.254	31.0032	0.89	31.0032	0.147
31.0275	3.619	31.0275	1.41182	31.0275	0.431	31.0275	0.27	31.0275	1.517	31.0275	0.172	31.0275	1.053	31.0275	-0.102
31.0518	3.505	31.0518	0.72606	31.0518	0.291	31.0518	0.026	31.0518	0.726	31.0518	-0.023	31.0518	0.907	31.0518	0.103
31.0761	3.598	31.0761	0.3383	31.0761	0.79	31.0761	0.142	31.0761	1.1	31.0761	0.06	31.0761	0.72	31.0761	0.112
31.1005	3.711	31.1005	0.65156	31.1005	0.207	31.1005	0.156	31.1005	0.794	31.1005	-0.043	31.1005	0.946	31.1005	0.245
31.1248	3.557	31.1248	0.54281	31.1248	0.603	31.1248	0.118	31.1248	0.704	31.1248	-0.063	31.1248	1.12	31.1248	-0.138
31.1491	3.443	31.1491	0.24805	31.1491	0.597	31.1491	0.431	31.1491	0.47	31.1491	0.092	31.1491	1.211	31.1491	-0.077
31.1734	3.402	31.1734	0.28329	31.1734	1.014	31.1734	-0.164	31.1734	0.432	31.1734	0.176	31.1734	1.087	31.1734	0.314
31.1978	3.474	31.1978	0.21555	31.1978	0.751	31.1978	0.438	31.1978	0.58	31.1978	0.176	31.1978	0.735	31.1978	0.127
31.2221	3.711	31.2221	0.3118	31.2221	0.58	31.2221	-0.023	31.2221	0.512	31.2221	-0.163	31.2221	1.322	31.2221	0.064
31.2464	3.464	31.2464	0.18204	31.2464	0.493	31.2464	-0.05	31.2464	0.062	31.2464	0.188	31.2464	1.538	31.2464	0.631
31.2707	3.206	31.2707	0.35128	31.2707	0.539	31.2707	-0.015	31.2707	0.035	31.2707	-0.037	31.2707	0.836	31.2707	0.393
31.295	3.247	31.295	0.18053	31.295	0.657	31.295	0.287	31.295	0.152	31.295	0.386	31.295	0.33	31.295	0.856
31.3194	3.835	31.3194	0.51479	31.3194	0.054	31.3194	0.075	31.3194	-0.029	31.3194	0.449	31.3194	0.649	31.3194	0.804
31.3437	3.495	31.3437	0.33303	31.3437	-0.188	31.3437	0.12	31.3437	-0.076	31.3437	0.326	31.3437	0.525	31.3437	1.113
31.368	3.309	31.368	0.23427	31.368	0.137	31.368	0.34	31.368	-0.392	31.368	0.513	31.368	0.123	31.368	1.009
31.3923	3.464	31.3923	0.30052	31.3923	0.091	31.3923	0.262	31.3923	0.087	31.3923	0.535	31.3923	0.628	31.3923	0.957
31.4167	3.289	31.4167	0.45978	31.4167	0.303	31.4167	0.287	31.4167	-0.064	31.4167	0.742	31.4167	0.236	31.4167	0.977
31.441	3.464	31.441	0.15502	31.441	-0.341	31.441	-0.152	31.441	0.034	31.441	0.898	31.441	0.184	31.441	0.884
31.4653	3.485	31.4653	0.44726	31.4653	-0.078	31.4653	0.007	31.4653	0.141	31.4653	1.085	31.4653	0.122	31.4653	0.564
31.4896	3.649	31.4896	0.19351	31.4896	-0.247	31.4896	-0.01	31.4896	0.527	31.4896	1.314	31.4896	0.524	31.4896	0.389
31.514	3.649	31.514	0.50777	31.514	0.081	31.514	0.17	31.514	0.944	31.514	2.511	31.514	0.432	31.514	0.44
31.5383	3.794	31.5383	0.58401	31.5383	-0.178	31.5383	-0.063	31.5383	2.145	31.5383	2.657	31.5383	0.123	31.5383	0.378
31.5626	3.639	31.5626	1.12425	31.5626	0.213	31.5626	0.231	31.5626	1.222	31.5626	1.689	31.5626	0.164	31.5626	0.615
31.5869	3.485	31.5869	1.2835	31.5869	0.325	31.5869	-0.157	31.5869	0.547	31.5869	1.557	31.5869	0.175	31.5869	0.533
31.6112	3.701	31.6112	1.36974	31.6112	1.046	31.6112	-0.018	31.6112	1.212	31.6112	1.528	31.6112	0.258	31.6112	0.595
31.6356	3.691	31.6356	0.879	31.6356	0.344	31.6356	0.224	31.6356	0.929	31.6356	1.065	31.6356	-0.298	31.6356	0.389
31.6599	3.247	31.6599	0.92424	31.6599	0.405	31.6599	-0.184	31.6599	0.388	31.6599	0.562	31.6599	0.456	31.6599	0.925
31.6842	3.753	31.6842	1.55749	31.6842	0.641	31.6842	-0.158	31.6842	0.28	31.6842	0.193	31.6842	0.116	31.6842	0.74
31.7085	3.557	31.7085	1.32473	31.7085	0.506	31.7085	0.059	31.7085	0.389	31.7085	0.494	31.7085	0.024	31.7085	0.74
31.7329	3.124	31.7329	1.30899	31.7329	0.32	31.7329	0.183	31.7329	0.394	31.7329	0.021	31.7329	0.18	31.7329	1.308
31.7572	3.557	31.7572	1.26123	31.7572	0.155	31.7572	0.06	31.7572	0.349	31.7572	0.085	31.7572	0.232	31.7572	1.649
31.7815	3.062	31.7815	1.30648	31.7815	0.866	31.7815	0.06	31.7815	-0.171	31.7815	0.273	31.7815	0.244	31.7815	1.587
31.8058	3.866	31.8058	1.38272	31.8058	0.639	31.8058	0.257	31.8058	-0.268	31.8058	0.419	31.8058	0.204	31.8058	1.567
31.8302	3.557	31.8302	1.30498	31.8302	1.123	31.8302	-0.217	31.8302	0.174	31.8302	0.236	31.8302	0.288	31.8302	1.455
31.8545	3.34	31.8545	1.38122	31.8545	1.422	31.8545	0.382	31.8545	0.317	31.8545	0.166	31.8545	0.599	31.8545	1.507
31.8788	3.206	31.8788	1.15847	31.8788	1.607	31.8788	0.27	31.8788	-0.21	31.8788	0.457	31.8788	0.445	31.8788	0.848
31.9031	3.392	31.9031	1.15271	31.9031	1.36	31.9031	0.219	31.9031	0.16	31.9031	0.346	31.9031	0.54	31.9031	1.508
31.9274	3.433	31.9274	0.87895	31.9274	1.339	31.9274	0.818	31.9274	-0.109	31.9274	0.101	31.9274	0.407	31.9274	1.303
31.9518	3.031	31.9518	1.15122	31.9518	1.04	31.9518	0.365	31.9518	0.446	31.9518	0.268	31.9518	0.44	31.9518	0.789
31.9761	3.144	31.9761	1.25846	31.9761	0.835	31.9761	0.387	31.9761	-0.039	31.9761	1.023	31.9761	0.37	31.9761	1.274
32.0004	3.144	32.0004	2.1597	32.0004	0.392	32.0004	1.151	32.0004	0.218	32.0004	1.046	32.0004	0.372	32.0004	1.255
32.0247	3.423	32.0247	4.23594	32.0247	0.485	32.0247	0.833	32.0247	0.568	32.0247	1.853	32.0247	0.498	32.0247	1.813
32.0491	2.897	32.0491	5.09621	32.0491	0.362	32.0491	1.04	32.0491	0.32	32.0491	2.01	32.0491	0.335	32.0491	3.134
32.0734	3.268	32.0734	4.79045	32.0734	0.29	32.0734	0.764	32.0734	0.073	32.0734	1.704	32.0734	0.389	32.0734	6.64
32.0977	3.165	32.0977	4.74369	32.0977	-0.06	32.0977	0.683	32.0977	0.485	32.0977	1.655	32.0977	0.638	32.0977	8.879
32.122	3.186	32.122	4.78893	32.122	-0.162	32.122	0.375	32.122	0.34	32.122	0.792	32.122	0.95	32.122	7.787
32.1464	3.258	32.1464	3.8652	32.1464	0.323	32.1464	0.438	32.1464	0.278	32.1464	1.3	32.1464	0.953	32.1464	6.541
32.1707	3.608	32.1707	3.37444	32.1707	-0.129	32.1707	0.316	32.1707	0.196	32.1707	0.468	32.1707	1.192	32.1707	7.254
32.195	3.155	32.195	2.29668	32.195	0.212	32.195	0.112	32.195	0.052	32.195	0.522	32.195	0.71	32.195	6.359
32.2193	3.175	32.2193	1.80593	32.2193	-0.055	32.2193	-0.01	32.2193	0.032	32.2193	0.288	32.2193	0.641	32.2193	3.938
32.2436	3.072	32.2436	1.38717	32.2436	-0.167	32.2436	-0.049	32.2436	-0.04	32.2436	0.394	32.2436	0.19	32.2436	3.135
32.268	2.907	32.268	0.90743	32.268	0.154	32.268	0.241	32.268	-0.101	32.268	0.408	32.268	0.43	32.268	2.725
32.2923	3.082	32.2923	0.97367	32.2923	0.32	32.2923	0.068	32.2923	0.105	32.2923	0.143	32.2923	0.402	32.2923	1.686
32.3166	2.845	32.3166	0.81292	32.3166	0.146	32.3166	0.472	32.3166	-0.11	32.3166	0.074	32.3166	-0.131	32.3166	1.44
32.3409	2.918	32.3409	0.86816	32.3409	0.426	32.3409	0.567	32.3409	0.004	32.3409	-0.098	32.3409	0.13	32.3409	1.71
32.3653	3.155	32.3653	1.28542	32.3653	0.727	32.3653	0.497	32.3653	-0.046	32.3653	0.204	32.3653	0.216	32.3653	1.021
32.3896	3.134	32.3896	1.69166	32.3896	0.945	32.3896	1.098	32.3896	-0.014	32.3896	-0.122	32.3896	-0.069	32.3896	0.776
32.4139	2.711	32.4139	2.09791	32.4139	0.493	32.4139	1.244	32.4139	-0.034	32.4139	0.036	32.4139	-0.179	32.4139	0.83
32.4382	2.732	32.4382	2.23615	32.4382	0.382	32.4382	1.896	32.4382	0.071	32.4382	0.307	32.4382	0.319	32.4382	0.915
32.4626	2.99	32.4626	2.39441	32.4626	0.518	32.4626	1.651	32.4626	-0.175	32.4626	0.435	32.4626	-0.11	32.4626	1.072
32.4869	2.753	32.4869	2.09965	32.4869	0.675	32.4869	1.345	32.4869	-0.062	32.4869	1.418	32.4869	-0.003	32.4869	1.383
32.5112	2.969	32.5112	1.6399	32.5112	0.697	32.5112	1.162	32.5112	0.093	32.5112	2.174	32.5112	0.444	32.5112	1.045
32.5355	2.814	32.5355	1.60314	32.5355	0.834	32.5355	1.113	32.5355	-0.092	32.5355	2.487	32.5355	0.314	32.5355	1.275
32.5598	2.887	32.5598	0.91738	32.5598	0.898	32.5598	0.879	32.5598	-0.061	32.5598	3.563	32.5598	-0.053	32.5598	1.288
32.5842	3.309	32.5842	0.97264	32.5842	0.973	32.5842	0.263	32.5842	0.135	32.5842	4.546	32.5842	0.116	32.5842	1.476
32.6085	2.969	32.6085	1.25489	32.6085	1.233	32.6085	0.101	32.6085	-0.194	32.6085	5.735	32.6085	0.213	32.6085	1.272
32.6328	3	32.6328	0.97113	32.6328	1.627	32.6328	0.155	32.6328	0.023	32.6328	5.822	32.6328	0.042	32.6328	1.285
32.6571	3.01	32.6571	0.98537	32.6571	1.331	32.6571	0.035	32.6571	0.178	32.6571	4.836	32.6571	0.51	32.6571	0.855
32.6815	2.938	32.6815	1.26763	32.6815	0.798	32.6815	0.131	32.6815	0.004	32.6815	4.304	32.6815	0.205	32.6815	0.631
32.7058	2.979	32.7058	2.06588	32.7058	0.718	32.7058	0.02	32.7058	-0.006	32.7058	3.009	32.7058	0.509	32.7058	0.933
32.7301	2.814	32.7301	1.78212	32.7301	0.535	32.7301	0.209	32.7301	0.099	32.7301	2.333	32.7301	0.152	32.7301	0.194
32.7544	2.887	32.7544	1.61036	32.7544	0.466	32.7544	0.068	32.7544	0.316	32.7544	1.605	32.7544	0.497	32.7544	0.568
32.7788	3.144	32.7788	1.19262	32.7788	0.067	32.7788	0.288	32.7788	-0.033	32.7788	0.249	32.7788	0.234	32.7788	0.581
32.8031	3	32.8031	1.21687	32.8031	-0.012	32.8031	0.261	32.8031	0.154	32.8031	0.696	32.8031	0.631	32.8031	0.162
32.8274	3	32.8274	0.77811	32.8274	0.043	32.8274	-0.004	32.8274	0.166	32.8274	0.268	32.8274	0.708	32.8274	0.258
32.8517	2.773	32.8517	0.90635	32.8517	0.108	32.8517	-0.01	32.8517	-0.1	32.8517	0.231	32.8517	0.548	32.8517	0.261
32.876	2.938	32.876	0.5596	32.876	0.256	32.876	0.158	32.876	0.046	32.876	0.411	32.876	0.594	32.876	0.1
32.9004	3.237	32.9004	0.98686	32.9004	0.27	32.9004	0.275	32.9004	0.326	32.9004	0.951	32.9004	0.486	32.9004	0.165
32.9247	2.835	32.9247	1.0111	32.9247	0.17	32.9247	0.166	32.9247	0.369	32.9247	1.399	32.9247	0.388	32.9247	0.169
32.949	3.134	32.949	1.86134	32.949	0.081	32.949	-0.026	32.949	0.217	32.949	1.301	32.949	0.456	32.949	0.017
32.9733	3.062	32.9733	2.00959	32.9733	0.456	32.9733	0.184	32.9733	0.209	32.9733	1.511	32.9733	0.678	32.9733	-0.02
32.9977	2.876	32.9977	2.64285	32.9977	0.161	32.9977	0.044	32.9977	0.366	32.9977	1.052	32.9977	0.291	32.9977	0.087
33.022	2.753	33.022	2.89409	33.022	0.186	33.022	0.161	33.022	0.049	33.022	0.676	33.022	0.606	33.022	0.369
33.0463	3.041	33.0463	2.71333	33.0463	-0.151	33.0463	0.258	33.0463	0.35	33.0463	0.814	33.0463	0.313	33.0463	0.579
33.0706	3.01	33.0706	1.98558	33.0706	-0.157	33.0706	0.211	33.0706	0.25	33.0706	0.221	33.0706	0.35	33.0706	1.129
33.095	3.113	33.095	1.76284	33.095	-0.085	33.095	0.133	33.095	0.541	33.095	0.103	33.095	0.315	33.095	1.7
33.1193	3.175	33.1193	1.35508	33.1193	0.09	33.1193	0.034	33.1193	0.544	33.1193	-0.068	33.1193	0.496	33.1193	1.889
33.1436	3.289	33.1436	1.24532	33.1436	0.111	33.1436	0.379	33.1436	0.496	33.1436	-0.166	33.1436	0.842	33.1436	2.646
33.1679	3.32	33.1679	1.00257	33.1679	0.286	33.1679	-0.122	33.1679	0.715	33.1679	-0.356	33.1679	0.539	33.1679	3.166
33.1923	3.165	33.1923	1.14083	33.1923	0.709	33.1923	-0.169	33.1923	0.688	33.1923	-0.022	33.1923	0.721	33.1923	2.861
33.2166	3.309	33.2166	0.87707	33.2166	0.802	33.2166	0.135	33.2166	0.619	33.2166	-0.182	33.2166	0.222	33.2166	2.617
33.2409	2.969	33.2409	0.66431	33.2409	0.648	33.2409	-0.087	33.2409	0.725	33.2409	0.029	33.2409	0.837	33.2409	2.436
33.2652	3.144	33.2652	0.55556	33.2652	0.442	33.2652	-0.031	33.2652	0.595	33.2652	-0.039	33.2652	0.905	33.2652	2.471
33.2895	3.247	33.2895	0.8998	33.2895	0.638	33.2895	0.149	33.2895	0.496	33.2895	0.059	33.2895	0.922	33.2895	1.878
33.3139	3.392	33.3139	1.18306	33.3139	0.577	33.3139	0.01	33.3139	0.252	33.3139	0.064	33.3139	0.826	33.3139	1.944
33.3382	2.866	33.3382	0.8363	33.3382	0.691	33.3382	0.118	33.3382	0.369	33.3382	-0.055	33.3382	1.152	33.3382	1.66
33.3625	3.103	33.3625	1.22155	33.3625	0.836	33.3625	-0.114	33.3625	0.487	33.3625	0.022	33.3625	1.056	33.3625	2.118
33.3868	3.237	33.3868	1.24679	33.3868	0.847	33.3868	0.231	33.3868	0.326	33.3868	-0.055	33.3868	0.919	33.3868	2.072
33.4112	3.381	33.4112	1.44705	33.4112	0.59	33.4112	-0.011	33.4112	0.557	33.4112	0.28	33.4112	0.833	33.4112	1.252
33.4355	3.33	33.4355	1.75029	33.4355	0.416	33.4355	0.128	33.4355	0.159	33.4355	0.388	33.4355	0.871	33.4355	2.091
33.4598	3.443	33.4598	1.50754	33.4598	0.716	33.4598	0.226	33.4598	0.669	33.4598	0.032	33.4598	0.373	33.4598	1.395
33.4841	3.536	33.4841	1.27378	33.4841	1.16	33.4841	-0.088	33.4841	0.932	33.4841	0.068	33.4841	0.422	33.4841	1.71
33.5085	3.515	33.5085	1.67004	33.5085	1.471	33.5085	-0.258	33.5085	0.843	33.5085	0.115	33.5085	0.429	33.5085	1.22
33.5328	3.567	33.5328	1.02528	33.5328	2.297	33.5328	0.098	33.5328	0.663	33.5328	0.182	33.5328	0.746	33.5328	0.843
33.5571	3.763	33.5571	0.91553	33.5571	3.556	33.5571	0.174	33.5571	0.956	33.5571	0.136	33.5571	0.259	33.5571	0.756
33.5814	3.732	33.5814	0.86877	33.5814	4.815	33.5814	0.437	33.5814	0.632	33.5814	0.018	33.5814	0.493	33.5814	0.668
33.6057	3.639	33.6057	0.86201	33.6057	4.724	33.6057	0.72	33.6057	0.895	33.6057	0.333	33.6057	0.192	33.6057	0.209
33.6301	3.856	33.6301	0.79427	33.6301	4.54	33.6301	1.498	33.6301	0.786	33.6301	0.049	33.6301	-0.006	33.6301	0.38
33.6544	3.66	33.6544	1.15952	33.6544	4.109	33.6544	1.349	33.6544	0.307	33.6544	0.292	33.6544	0.507	33.6544	0.952
33.6787	3.649	33.6787	1.39076	33.6787	3.75	33.6787	2.137	33.6787	0.457	33.6787	0.154	33.6787	0.443	33.6787	0.793
33.703	3.794	33.703	1.57	33.703	3.432	33.703	1.194	33.703	0.504	33.703	0.036	33.703	0.441	33.703	0.746
33.7274	3.412	33.7274	1.68827	33.7274	2.599	33.7274	1.24	33.7274	0.582	33.7274	0.33	33.7274	0.542	33.7274	0.845
33.7517	3.773	33.7517	2.21751	33.7517	1.828	33.7517	1.101	33.7517	0.475	33.7517	0.264	33.7517	1.086	33.7517	1.057
33.776	3.856	33.776	3.06775	33.776	2.16	33.776	0.942	33.776	0.12	33.776	0.249	33.776	1.899	33.776	1.464
33.8003	4.072	33.8003	3.81399	33.8003	1.884	33.8003	0.875	33.8003	0.301	33.8003	-0.065	33.8003	1.721	33.8003	2.037
33.8247	4.546	33.8247	4.15826	33.8247	1.958	33.8247	0.344	33.8247	0.266	33.8247	0.137	33.8247	1.771	33.8247	1.29
33.849	4.072	33.849	3.6475	33.849	1.765	33.849	0.453	33.849	0.211	33.849	0.081	33.849	1.625	33.849	0.874
33.8733	4.351	33.8733	2.80574	33.8733	1.262	33.8733	0.263	33.8733	0.207	33.8733	-0.026	33.8733	2.18	33.8733	1.148
33.8976	4.32	33.8976	3.00598	33.8976	0.883	33.8976	0.537	33.8976	0.399	33.8976	0.269	33.8976	2.715	33.8976	1.009
33.9219	4.402	33.9219	2.44323	33.9219	0.917	33.9219	0.594	33.9219	0.035	33.9219	-0.024	33.9219	2.631	33.9219	0.582
33.9463	3.835	33.9463	1.86049	33.9463	0.219	33.9463	0.744	33.9463	0.165	33.9463	0.044	33.9463	2.444	33.9463	1.568
33.9706	4.32	33.9706	1.17373	33.9706	0.696	33.9706	0.802	33.9706	0.615	33.9706	-0.114	33.9706	1.753	33.9706	1.574
33.9949	4.526	33.9949	0.66198	33.9949	0.482	33.9949	0.663	33.9949	0.385	33.9949	0.067	33.9949	1.824	33.9949	1.487
34.0192	4.495	34.0192	0.47122	34.0192	0.351	34.0192	0.927	34.0192	0.413	34.0192	-0.246	34.0192	1.276	34.0192	1.061
34.0436	4.186	34.0436	0.46448	34.0436	0.334	34.0436	0.892	34.0436	0.472	34.0436	0.152	34.0436	0.987	34.0436	1.232
34.0679	4.113	34.0679	0.16972	34.0679	0.409	34.0679	0.754	34.0679	0.922	34.0679	0.045	34.0679	0.604	34.0679	1.3
34.0922	4.216	34.0922	0.37997	34.0922	0.299	34.0922	0.657	34.0922	1.116	34.0922	0.052	34.0922	0.325	34.0922	1.575
34.1165	4.01	34.1165	0.17821	34.1165	0.375	34.1165	0.663	34.1165	1.257	34.1165	0.842	34.1165	0.345	34.1165	1.386
34.1409	4.062	34.1409	0.26547	34.1409	0.594	34.1409	0.371	34.1409	0.512	34.1409	0.952	34.1409	0.551	34.1409	2.176
34.1652	4.34	34.1652	0.31071	34.1652	0.217	34.1652	0.439	34.1652	0.613	34.1652	1.453	34.1652	0.117	34.1652	1.77
34.1895	4.381	34.1895	0.61396	34.1895	0.024	34.1895	0.229	34.1895	0.786	34.1895	1.646	34.1895	0.344	34.1895	1.272
34.2138	3.68	34.2138	0.5662	34.2138	0.131	34.2138	0.504	34.2138	0.681	34.2138	1.282	34.2138	0.302	34.2138	1.299
34.2381	4.186	34.2381	0.30244	34.2381	0.125	34.2381	0.077	34.2381	0.503	34.2381	1.433	34.2381	0.498	34.2381	1.409
34.2625	3.845	34.2625	0.6057	34.2625	0.056	34.2625	0.352	34.2625	0.635	34.2625	0.471	34.2625	0.426	34.2625	1.117
34.2868	4.34	34.2868	0.42495	34.2868	0.576	34.2868	0.472	34.2868	0.448	34.2868	0.911	34.2868	0.56	34.2868	1.114
34.3111	4.258	34.3111	0.34619	34.3111	0.807	34.3111	0.108	34.3111	0.714	34.3111	0.619	34.3111	0.601	34.3111	1.018
34.3354	4.041	34.3354	0.60843	34.3354	0.295	34.3354	0.373	34.3354	0.393	34.3354	0.224	34.3354	0.56	34.3354	0.582
34.3598	3.969	34.3598	0.51969	34.3598	0.599	34.3598	0.184	34.3598	0.422	34.3598	0.149	34.3598	0.519	34.3598	0.3
34.3841	4.144	34.3841	0.67894	34.3841	1.056	34.3841	0.469	34.3841	0.39	34.3841	-0.05	34.3841	0.365	34.3841	0.637
34.4084	3.959	34.4084	1.15718	34.4084	1.257	34.4084	0.25	34.4084	0.502	34.4084	0.081	34.4084	0.427	34.4084	0.284
34.4327	3.918	34.4327	0.73842	34.4327	0.859	34.4327	0.03	34.4327	0.624	34.4327	-0.046	34.4327	0.201	34.4327	0.198
34.4571	3.804	34.4571	0.72268	34.4571	1.173	34.4571	-0.138	34.4571	0.005	34.4571	-0.059	34.4571	0.036	34.4571	0.381
34.4814	4.082	34.4814	0.99493	34.4814	0.879	34.4814	0.21	34.4814	0.024	34.4814	-0.217	34.4814	0.264	34.4814	0.378
34.5057	4.186	34.5057	0.70017	34.5057	0.543	34.5057	0.093	34.5057	-0.183	34.5057	0.09	34.5057	0.254	34.5057	0.056
34.53	3.773	34.53	0.62141	34.53	1.084	34.53	-0.064	34.53	0.157	34.53	-0.109	34.53	0.358	34.53	-0.07
34.5543	4.175	34.5543	0.26566	34.5543	0.811	34.5543	-0.118	34.5543	-0.019	34.5543	-0.4	34.5543	0.143	34.5543	0.082
34.5787	4.186	34.5787	0.54792	34.5787	0.527	34.5787	-0.142	34.5787	-0.071	34.5787	0.143	34.5787	0.144	34.5787	-0.168
34.603	3.577	34.603	0.28416	34.603	0.512	34.603	0.082	34.603	0.011	34.603	0.079	34.603	0.103	34.603	-0.101
34.6273	3.67	34.6273	0.5464	34.6273	0.548	34.6273	-0.003	34.6273	-0.155	34.6273	-0.202	34.6273	0.177	34.6273	0.048
34.6516	3.918	34.6516	0.56065	34.6516	0.182	34.6516	0.159	34.6516	-0.006	34.6516	0.105	34.6516	-0.018	34.6516	0.023
34.676	3.237	34.676	0.52391	34.676	0.661	34.676	0.321	34.676	0.081	34.676	0.133	34.676	0.334	34.676	0.42
34.7003	3.433	34.7003	0.49715	34.7003	0.687	34.7003	0.174	34.7003	-0.132	34.7003	-0.117	34.7003	-0.149	34.7003	0.333
34.7246	3.505	34.7246	0.92339	34.7246	0.92	34.7246	-0.097	34.7246	-0.045	34.7246	-0.088	34.7246	-0.158	34.7246	0.163
34.7489	3.196	34.7489	0.78364	34.7489	1.132	34.7489	0.055	34.7489	0.084	34.7489	-0.245	34.7489	-0.272	34.7489	0.23
34.7733	3.371	34.7733	1.1079	34.7733	0.756	34.7733	0.052	34.7733	0.15	34.7733	-0.072	34.7733	0.345	34.7733	-0.063
34.7976	3.351	34.7976	0.84414	34.7976	0.762	34.7976	0.369	34.7976	0.361	34.7976	0.359	34.7976	0.045	34.7976	0.025
34.8219	3.165	34.8219	1.17838	34.8219	0.974	34.8219	0.13	34.8219	0.088	34.8219	0.336	34.8219	0.096	34.8219	0.382
34.8462	2.876	34.8462	1.32663	34.8462	1.062	34.8462	0.303	34.8462	0.052	34.8462	0.2	34.8462	0.167	34.8462	0.511
34.8705	3.206	34.8705	1.66087	34.8705	1.223	34.8705	0.527	34.8705	0.315	34.8705	0.002	34.8705	-0.061	34.8705	1.074
34.8949	2.722	34.8949	2.33513	34.8949	1.332	34.8949	0.618	34.8949	0.598	34.8949	0.268	34.8949	0.392	34.8949	1.162
34.9192	3.01	34.9192	2.22537	34.9192	2.287	34.9192	0.729	34.9192	0.944	34.9192	-0.105	34.9192	0.587	34.9192	1.179
34.9435	2.742	34.9435	2.26062	34.9435	2.963	34.9435	1.438	34.9435	0.527	34.9435	-0.168	34.9435	0.69	34.9435	1.442
34.9678	2.701	34.9678	2.27586	34.9678	3.011	34.9678	2.673	34.9678	1.213	34.9678	0.098	34.9678	1.349	34.9678	1.686
34.9922	2.825	34.9922	1.61012	34.9922	2.863	34.9922	2.3	34.9922	1.816	34.9922	-0.089	34.9922	1.297	34.9922	2.146
35.0165	2.67	35.0165	1.50036	35.0165	2.405	35.0165	1.814	35.0165	3.296	35.0165	0.002	35.0165	1.534	35.0165	2.1
35.0408	2.876	35.0408	1.28861	35.0408	3.164	35.0408	1.317	35.0408	5.519	35.0408	-0.072	35.0408	1.338	35.0408	2.034
35.0651	2.773	35.0651	0.59185	35.0651	2.831	35.0651	1.109	35.0651	7.071	35.0651	0.04	35.0651	1.266	35.0651	2.34
35.0895	2.845	35.0895	0.71911	35.0895	1.735	35.0895	0.963	35.0895	5.242	35.0895	0.286	35.0895	1.936	35.0895	1.594
35.1138	2.412	35.1138	0.34235	35.1138	0.7	35.1138	0.621	35.1138	3.713	35.1138	0.232	35.1138	1.142	35.1138	1.446
35.1381	2.474	35.1381	0.4496	35.1381	1.017	35.1381	-0.009	35.1381	3.41	35.1381	0.241	35.1381	1.142	35.1381	1.05
35.1624	2.577	35.1624	0.25784	35.1624	0.467	35.1624	0.185	35.1624	2.849	35.1624	0.426	35.1624	1.277	35.1624	0.521
35.1867	2.691	35.1867	0.36508	35.1867	0.546	35.1867	0.205	35.1867	1.639	35.1867	0.795	35.1867	1.586	35.1867	0.548
35.2111	2.536	35.2111	0.46234	35.2111	-0.106	35.2111	0.234	35.2111	0.729	35.2111	0.804	35.2111	2.71	35.2111	0.297
35.2354	2.588	35.2354	0.21959	35.2354	0.365	35.2354	0.212	35.2354	0.199	35.2354	0.401	35.2354	1.701	35.2354	0.407
35.2597	2.464	35.2597	0.48083	35.2597	-0.019	35.2597	0.108	35.2597	0.237	35.2597	0.142	35.2597	0.846	35.2597	0.012
35.284	2.567	35.284	0.26907	35.284	-0.146	35.284	-0.037	35.284	0.327	35.284	0.162	35.284	1.042	35.284	0.225
35.3084	2.495	35.3084	-0.00567	35.3084	-0.09	35.3084	0.075	35.3084	-0.15	35.3084	0.223	35.3084	1.064	35.3084	-0.118
35.3327	2.742	35.3327	0.32858	35.3327	0.018	35.3327	-0.194	35.3327	0.3	35.3327	-0.098	35.3327	0.807	35.3327	-0.163
35.357	2.361	35.357	-0.03818	35.357	-0.071	35.357	-0.051	35.357	-0.115	35.357	-0.181	35.357	0.818	35.357	-0.21
35.3813	2.536	35.3813	0.14106	35.3813	0.223	35.3813	-0.206	35.3813	0.088	35.3813	0.137	35.3813	0.788	35.3813	0.464
35.4057	2.423	35.4057	0.19732	35.4057	0.083	35.4057	0.052	35.4057	-0.09	35.4057	-0.173	35.4057	0.82	35.4057	0.232
35.43	2.588	35.43	0.14957	35.43	0.562	35.43	0.125	35.43	0.258	35.43	-0.081	35.43	0.543	35.43	0.514
35.4543	2.588	35.4543	-0.02119	35.4543	0.866	35.4543	0.116	35.4543	0.287	35.4543	0.001	35.4543	0.369	35.4543	0.385
35.4786	3.021	35.4786	0.12805	35.4786	1.376	35.4786	0.045	35.4786	0.233	35.4786	-0.227	35.4786	0.494	35.4786	0.493
35.5029	2.577	35.5029	0.0803	35.5029	1.556	35.5029	0.118	35.5029	0.241	35.5029	-0.155	35.5029	0.166	35.5029	0.518
35.5273	2.66	35.5273	0.29056	35.5273	1.778	35.5273	0.418	35.5273	0.054	35.5273	-0.248	35.5273	-0.018	35.5273	0.584
35.5516	2.567	35.5516	0.1198	35.5516	1.309	35.5516	0.172	35.5516	-0.185	35.5516	-0.008	35.5516	0.262	35.5516	0.63
35.5759	2.608	35.5759	-0.23696	35.5759	1.664	35.5759	0.05	35.5759	-0.05	35.5759	0.016	35.5759	0.047	35.5759	0.367
35.6002	2.577	35.6002	-0.07771	35.6002	1.361	35.6002	0.381	35.6002	0.136	35.6002	-0.115	35.6002	0.131	35.6002	0.351
35.6246	2.701	35.6246	0.01902	35.6246	0.974	35.6246	0.547	35.6246	0.117	35.6246	0.115	35.6246	0.144	35.6246	0.088
35.6489	2.753	35.6489	0.1846	35.6489	1.134	35.6489	0.456	35.6489	0.428	35.6489	-0.098	35.6489	0.269	35.6489	0.33
35.6732	3	35.6732	-0.25682	35.6732	0.676	35.6732	0.592	35.6732	0.367	35.6732	0.174	35.6732	0.632	35.6732	0.243
35.6975	2.845	35.6975	0.15776	35.6975	0.455	35.6975	0.634	35.6975	0.245	35.6975	0.713	35.6975	1.016	35.6975	0.495
35.7219	2.835	35.7219	0.29335	35.7219	0.296	35.7219	0.853	35.7219	0.824	35.7219	1.335	35.7219	1.245	35.7219	1.315
35.7462	3.041	35.7462	0.08793	35.7462	0.683	35.7462	0.968	35.7462	0.898	35.7462	0.958	35.7462	1.206	35.7462	2.65
35.7705	2.835	35.7705	0.37851	35.7705	0.988	35.7705	1.31	35.7705	1.416	35.7705	1.044	35.7705	1.642	35.7705	3.14
35.7948	2.948	35.7948	0.31809	35.7948	1.087	35.7948	1.106	35.7948	1.614	35.7948	1.151	35.7948	1.252	35.7948	3.197
35.8191	2.732	35.8191	0.54668	35.8191	1.619	35.8191	1.633	35.8191	1.379	35.8191	1.185	35.8191	1.482	35.8191	2.274
35.8435	3.433	35.8435	0.56926	35.8435	2.099	35.8435	2.491	35.8435	1.752	35.8435	0.581	35.8435	1.206	35.8435	1.599
35.8678	3.186	35.8678	0.44684	35.8678	2.848	35.8678	2.844	35.8678	1.786	35.8678	0.77	35.8678	1.549	35.8678	1.935
35.8921	3.557	35.8921	0.46943	35.8921	3.854	35.8921	2.98	35.8921	2.417	35.8921	0.434	35.8921	1.057	35.8921	1.497
35.9164	3.052	35.9164	0.16101	35.9164	4.036	35.9164	3.487	35.9164	1.935	35.9164	0.624	35.9164	0.308	35.9164	0.616
35.9408	3.237	35.9408	0.13159	35.9408	3.259	35.9408	3.356	35.9408	1.752	35.9408	0.906	35.9408	0.455	35.9408	0.23
35.9651	3.124	35.9651	0.34018	35.9651	3.585	35.9651	2.977	35.9651	2.064	35.9651	1.168	35.9651	0.046	35.9651	0.019
35.9894	3.433	35.9894	0.26876	35.9894	2.881	35.9894	2.381	35.9894	2.356	35.9894	1.275	35.9894	0.101	35.9894	0.087
36.0137	3.216	36.0137	0.06434	36.0137	2.506	36.0137	2.033	36.0137	2.658	36.0137	1.815	36.0137	0.403	36.0137	0.371
36.0381	3.515	36.0381	0.02493	36.0381	1.492	36.0381	1.613	36.0381	2.476	36.0381	2.407	36.0381	0.056	36.0381	-0.025
36.0624	3.526	36.0624	0.35651	36.0624	0.902	36.0624	1.09	36.0624	2.696	36.0624	2.607	36.0624	-0.074	36.0624	0.487
36.0867	3.227	36.0867	0.30609	36.0867	0.826	36.0867	1.237	36.0867	2.761	36.0867	2.725	36.0867	0.372	36.0867	0.297
36.111	3.34	36.111	0.20467	36.111	0.338	36.111	0.972	36.111	2.301	36.111	2.379	36.111	-0.016	36.111	0.355
36.1353	2.845	36.1353	0.22725	36.1353	0.335	36.1353	0.511	36.1353	2.706	36.1353	1.868	36.1353	0.246	36.1353	0.629
36.1597	3.072	36.1597	0.39384	36.1597	0.817	36.1597	0.864	36.1597	2.081	36.1597	1.223	36.1597	0.075	36.1597	0.151
36.184	2.722	36.184	0.54942	36.184	1.062	36.184	0.867	36.184	2.044	36.184	0.939	36.184	0.182	36.184	0.734
36.2083	2.845	36.2083	0.479	36.2083	1.481	36.2083	0.52	36.2083	2.306	36.2083	0.841	36.2083	1.557	36.2083	0.71
36.2326	2.701	36.2326	0.85158	36.2326	1.51	36.2326	0.513	36.2326	1.97	36.2326	0.588	36.2326	3.056	36.2326	0.747
36.257	2.825	36.257	1.06017	36.257	0.548	36.257	0.557	36.257	1.922	36.257	0.252	36.257	2.472	36.257	0.661
36.2813	2.505	36.2813	1.26775	36.2813	0.525	36.2813	0.601	36.2813	1.762	36.2813	0.03	36.2813	1.075	36.2813	0.472
36.3056	2.299	36.3056	1.76433	36.3056	0.667	36.3056	0.863	36.3056	1.271	36.3056	0.241	36.3056	1.131	36.3056	0.107
36.3299	2.515	36.3299	1.65191	36.3299	0.562	36.3299	0.381	36.3299	1.4	36.3299	0.133	36.3299	1.939	36.3299	-0.309
36.3543	2.485	36.3543	1.5295	36.3543	0.436	36.3543	0.56	36.3543	0.703	36.3543	0.375	36.3543	0.82	36.3543	-0.003
36.3786	2.485	36.3786	1.39708	36.3786	0.722	36.3786	0.471	36.3786	0.646	36.3786	-0.022	36.3786	0.268	36.3786	0.385
36.4029	2.464	36.4029	1.07966	36.4029	0.699	36.4029	0.186	36.4029	0.723	36.4029	0.127	36.4029	0.232	36.4029	0.434
36.4272	2.691	36.4272	1.35924	36.4272	1.017	36.4272	0.55	36.4272	0.522	36.4272	0.039	36.4272	0.154	36.4272	0.884
36.4516	2.165	36.4516	0.88683	36.4516	0.778	36.4516	0.296	36.4516	0.053	36.4516	0.148	36.4516	0.314	36.4516	0.736
36.4759	2.155	36.4759	0.85741	36.4759	0.807	36.4759	0.331	36.4759	-0.137	36.4759	0.318	36.4759	-0.022	36.4759	0.517
36.5002	1.969	36.5002	0.78699	36.5002	0.609	36.5002	0.253	36.5002	0.157	36.5002	0.302	36.5002	0.19	36.5002	0.204
36.5245	2	36.5245	0.20057	36.5245	0.649	36.5245	0.174	36.5245	0.616	36.5245	0.112	36.5245	0.164	36.5245	0.376
36.5488	1.938	36.5488	0.51216	36.5488	0.379	36.5488	0.23	36.5488	0.735	36.5488	0.128	36.5488	0.283	36.5488	0.58
36.5732	2.144	36.5732	0.92574	36.5732	0.058	36.5732	0.255	36.5732	1.349	36.5732	-0.032	36.5732	0.34	36.5732	0.391
36.5975	2.01	36.5975	0.72132	36.5975	0.211	36.5975	0.321	36.5975	1.478	36.5975	0.025	36.5975	0.015	36.5975	0.017
36.6218	1.948	36.6218	1.07291	36.6218	-0.017	36.6218	0.387	36.6218	1.897	36.6218	-0.011	36.6218	-0.124	36.6218	0.2
36.6461	2.062	36.6461	1.10549	36.6461	-0.1	36.6461	0.783	36.6461	1.573	36.6461	0.15	36.6461	-0.025	36.6461	-0.174
36.6705	2.186	36.6705	1.06607	36.6705	-0.05	36.6705	0.447	36.6705	1.826	36.6705	-0.247	36.6705	-0.184	36.6705	0.184
36.6948	1.856	36.6948	1.00566	36.6948	0.258	36.6948	0.936	36.6948	2.049	36.6948	-0.189	36.6948	0.059	36.6948	-0.231
36.7191	2.093	36.7191	1.03824	36.7191	0.257	36.7191	1.064	36.7191	1.953	36.7191	-0.307	36.7191	0.425	36.7191	0.045
36.7434	1.99	36.7434	0.97782	36.7434	0.339	36.7434	1.615	36.7434	1.444	36.7434	0.1	36.7434	-0.043	36.7434	-0.205
36.7678	2.021	36.7678	0.64941	36.7678	0.245	36.7678	1.475	36.7678	1.244	36.7678	-0.048	36.7678	-0.047	36.7678	0.05
36.7921	1.887	36.7921	0.86799	36.7921	0.574	36.7921	2.006	36.7921	1.055	36.7921	-0.218	36.7921	-0.062	36.7921	-0.045
36.8164	1.959	36.8164	0.78657	36.8164	-0.035	36.8164	1.887	36.8164	0.732	36.8164	0.025	36.8164	0.141	36.8164	-0.181
36.8407	1.825	36.8407	0.67515	36.8407	0.491	36.8407	1.974	36.8407	0.533	36.8407	-0.072	36.8407	0.013	36.8407	0.085
36.865	2.01	36.865	0.78973	36.865	-0.128	36.865	1.196	36.865	0.251	36.865	-0.117	36.865	-0.166	36.865	0.021
36.8894	2.175	36.8894	0.87432	36.8894	-0.129	36.8894	1.067	36.8894	0.444	36.8894	0.064	36.8894	0.15	36.8894	0.08
36.9137	2.072	36.9137	0.8239	36.9137	-0.056	36.9137	0.886	36.9137	0.317	36.9137	-0.105	36.9137	-0.246	36.9137	0.326
36.938	1.969	36.938	0.71248	36.938	0.028	36.938	0.428	36.938	0.005	36.938	-0.14	36.938	0.019	36.938	0.004
36.9623	1.835	36.9623	0.73406	36.9623	-0.095	36.9623	0.495	36.9623	0.229	36.9623	-0.092	36.9623	0.087	36.9623	0.105
36.9867	1.784	36.9867	0.84965	36.9867	0.102	36.9867	0.077	36.9867	0.082	36.9867	-0.014	36.9867	0.352	36.9867	-0.051
37.011	1.814	37.011	0.78923	37.011	-0.072	37.011	-0.206	37.011	0.245	37.011	-0.049	37.011	-0.167	37.011	0.122
37.0353	2.021	37.0353	0.57381	37.0353	0.208	37.0353	-0.07	37.0353	-0.005	37.0353	0.154	37.0353	0.211	37.0353	-0.065
37.0596	2.186	37.0596	0.53439	37.0596	0.179	37.0596	0.17	37.0596	0.168	37.0596	0.232	37.0596	0.136	37.0596	-0.098
37.084	1.948	37.084	0.65998	37.084	0.098	37.084	0.235	37.084	-0.02	37.084	0.084	37.084	0.009	37.084	0.107
37.1083	2.124	37.1083	0.81656	37.1083	-0.004	37.1083	0.392	37.1083	0.04	37.1083	0.163	37.1083	0.058	37.1083	0.198
37.1326	1.99	37.1326	0.84914	37.1326	0.091	37.1326	0.271	37.1326	-0.034	37.1326	0.17	37.1326	-0.1	37.1326	0.042
37.1569	2.093	37.1569	0.78872	37.1569	0.165	37.1569	0.222	37.1569	-0.222	37.1569	0.032	37.1569	0.062	37.1569	-0.042
37.1812	2.144	37.1812	0.8313	37.1812	0.229	37.1812	0.194	37.1812	0.038	37.1812	-0.023	37.1812	0.008	37.1812	-0.147
37.2056	2.041	37.2056	0.91489	37.2056	0.324	37.2056	0.208	37.2056	0.112	37.2056	0.365	37.2056	0.057	37.2056	-0.126
37.2299	2.711	37.2299	0.47347	37.2299	0.346	37.2299	-0.016	37.2299	0.146	37.2299	-0.153	37.2299	0.024	37.2299	-0.013
37.2542	2.433	37.2542	0.34105	37.2542	0.421	37.2542	0.348	37.2542	0.076	37.2542	-0.198	37.2542	0.114	37.2542	-0.075
37.2785	2.804	37.2785	0.76564	37.2785	0.423	37.2785	0.094	37.2785	0.119	37.2785	0.008	37.2785	-0.053	37.2785	0.163
37.3029	4.526	37.3029	0.71522	37.3029	0.662	37.3029	0.179	37.3029	0.091	37.3029	0.101	37.3029	-0.014	37.3029	0.08
37.3272	6.67	37.3272	0.7578	37.3272	0.572	37.3272	0.121	37.3272	-0.03	37.3272	-0.094	37.3272	-0.14	37.3272	-0.208
37.3515	6.268	37.3515	0.98639	37.3515	0.977	37.3515	-0.113	37.3515	0.035	37.3515	-0.207	37.3515	0.26	37.3515	0.039
37.3758	5.01	37.3758	1.64797	37.3758	1.876	37.3758	0.128	37.3758	-0.107	37.3758	0.133	37.3758	0.175	37.3758	0.524
37.4002	5.082	37.4002	2.81455	37.4002	2.281	37.4002	0.317	37.4002	-0.001	37.4002	0.051	37.4002	0.101	37.4002	0.535
37.4245	5.474	37.4245	3.97114	37.4245	2.036	37.4245	0.413	37.4245	-0.204	37.4245	-0.144	37.4245	0.367	37.4245	0.473
37.4488	5.433	37.4488	4.18872	37.4488	2.276	37.4488	0.685	37.4488	0.294	37.4488	0.382	37.4488	-0.016	37.4488	0.546
37.4731	5.567	37.4731	4.3553	37.4731	2.331	37.4731	0.307	37.4731	0.927	37.4731	0.393	37.4731	-0.1	37.4731	0.371
37.4974	5.464	37.4974	4.83088	37.4974	1.684	37.4974	0.538	37.4974	0.466	37.4974	0.744	37.4974	0.063	37.4974	0.424
37.5218	5.845	37.5218	3.86347	37.5218	1.461	37.5218	0.542	37.5218	0.171	37.5218	0.466	37.5218	-0.144	37.5218	0.61
37.5461	5.907	37.5461	3.42205	37.5461	0.969	37.5461	0.649	37.5461	0.308	37.5461	0.601	37.5461	-0.06	37.5461	0.167
37.5704	6.052	37.5704	2.68163	37.5704	0.714	37.5704	0.838	37.5704	0.58	37.5704	0.612	37.5704	-0.016	37.5704	0.199
37.5947	5.155	37.5947	2.22921	37.5947	0.821	37.5947	0.719	37.5947	0.265	37.5947	0.438	37.5947	0.017	37.5947	0.509
37.6191	4.371	37.6191	1.4268	37.6191	0.268	37.6191	0.826	37.6191	0.042	37.6191	0.398	37.6191	0.05	37.6191	0.221
37.6434	4.021	37.6434	0.62438	37.6434	0.292	37.6434	0.851	37.6434	-0.016	37.6434	0.223	37.6434	0.083	37.6434	0.088
37.6677	3.588	37.6677	0.45096	37.6677	0.44	37.6677	1.113	37.6677	0.05	37.6677	0.07	37.6677	-0.11	37.6677	-0.065
37.692	3.082	37.692	0.40054	37.692	0.866	37.692	1.097	37.692	0.024	37.692	-0.094	37.692	0.037	37.692	0.255
37.7164	2.732	37.7164	0.16513	37.7164	0.736	37.7164	1.215	37.7164	-0.085	37.7164	-0.072	37.7164	0.081	37.7164	0.267
37.7407	2.093	37.7407	-0.01929	37.7407	0.41	37.7407	1.312	37.7407	-0.112	37.7407	0.022	37.7407	-0.133	37.7407	0.103
37.765	2.01	37.765	0.06529	37.765	0.569	37.765	0.925	37.765	-0.049	37.765	0.023	37.765	0.292	37.765	0.228
37.7893	2.206	37.7893	0.05587	37.7893	0.284	37.7893	0.795	37.7893	-0.038	37.7893	-0.203	37.7893	0.058	37.7893	0.415
37.8136	1.959	37.8136	-0.04555	37.8136	0.433	37.8136	0.707	37.8136	-0.15	37.8136	-0.078	37.8136	0.35	37.8136	0.241
37.838	2.546	37.838	-0.17796	37.838	0.602	37.838	0.537	37.838	0.16	37.838	-0.035	37.838	-0.008	37.838	0.377
37.8623	2.155	37.8623	-0.10338	37.8623	0.555	37.8623	0.387	37.8623	0.357	37.8623	-0.095	37.8623	0.057	37.8623	0.389
37.8866	2.165	37.8866	0.1242	37.8866	0.384	37.8866	0.392	37.8866	-0.002	37.8866	-0.012	37.8866	0.318	37.8866	0.39
37.9109	1.876	37.9109	-0.21422	37.9109	0.337	37.9109	0.067	37.9109	0.082	37.9109	-0.216	37.9109	0.064	37.9109	0.474
37.9353	1.856	37.9353	-0.25363	37.9353	0.073	37.9353	-0.124	37.9353	0.011	37.9353	-0.101	37.9353	0.057	37.9353	0.27
37.9596	2.289	37.9596	-0.13905	37.9596	0.233	37.9596	-0.06	37.9596	0.208	37.9596	0.076	37.9596	0.091	37.9596	0.313
37.9839	1.959	37.9839	-0.03447	37.9839	0.299	37.9839	0.117	37.9839	-0.068	37.9839	-0.232	37.9839	0.105	37.9839	0.036
38.0082	2.113	38.0082	-0.10489	38.0082	0.706	38.0082	-0.118	38.0082	-0.015	38.0082	0.007	38.0082	0.408	38.0082	0.172
38.0326	1.845	38.0326	-0.000297365	38.0326	0.649	38.0326	-0.198	38.0326	0.163	38.0326	-0.084	38.0326	0.412	38.0326	0.618
38.0569	2.021	38.0569	-0.22572	38.0569	0.891	38.0569	0.34	38.0569	0.34	38.0569	0.083	38.0569	0.508	38.0569	0.269
38.0812	1.969	38.0812	0.00286	38.0812	0.917	38.0812	0.157	38.0812	0.033	38.0812	-0.132	38.0812	0.894	38.0812	0.251
38.1055	1.907	38.1055	-0.13955	38.1055	1.283	38.1055	0.293	38.1055	0.18	38.1055	-0.336	38.1055	0.743	38.1055	0.253
38.1298	1.825	38.1298	0.04803	38.1298	1	38.1298	0.141	38.1298	0.244	38.1298	0.037	38.1298	0.83	38.1298	0.637
38.1542	2.113	38.1542	-0.30139	38.1542	1.118	38.1542	-0.032	38.1542	0.102	38.1542	0.07	38.1542	0.267	38.1542	0.752
38.1785	2.186	38.1785	0.0712	38.1785	0.897	38.1785	0.011	38.1785	-0.06	38.1785	0.248	38.1785	0.941	38.1785	0.837
38.2028	2.144	38.2028	-0.12322	38.2028	0.738	38.2028	-0.089	38.2028	-0.037	38.2028	0.642	38.2028	0.399	38.2028	0.819
38.2271	2.155	38.2271	-0.20364	38.2271	0.898	38.2271	0.233	38.2271	0.028	38.2271	0.551	38.2271	0.022	38.2271	0.388
38.2515	2.33	38.2515	-0.14005	38.2515	0.904	38.2515	-0.084	38.2515	-0.103	38.2515	0.234	38.2515	0.213	38.2515	0.607
38.2758	2.258	38.2758	-0.22147	38.2758	0.652	38.2758	-0.071	38.2758	-0.007	38.2758	0.37	38.2758	0.393	38.2758	0.631
38.3001	2.34	38.3001	0.13111	38.3001	0.678	38.3001	-0.006	38.3001	0.079	38.3001	0.435	38.3001	-0.098	38.3001	0.406
38.3244	1.99	38.3244	0.08069	38.3244	0.684	38.3244	-0.034	38.3244	0.01	38.3244	0.478	38.3244	-0.185	38.3244	0.203
38.3488	2.041	38.3488	0.04128	38.3488	0.639	38.3488	-0.021	38.3488	0.271	38.3488	0.161	38.3488	0.106	38.3488	0.144
38.3731	1.948	38.3731	0.18686	38.3731	0.799	38.3731	0.24	38.3731	0.336	38.3731	0.04	38.3731	0.18	38.3731	0.188
38.3974	2.062	38.3974	0.35344	38.3974	0.692	38.3974	0.057	38.3974	0.33	38.3974	0.29	38.3974	0.193	38.3974	0.088
38.4217	1.959	38.4217	0.53002	38.4217	0.482	38.4217	0.132	38.4217	0.87	38.4217	0.2	38.4217	0.114	38.4217	-0.198
38.446	1.753	38.446	0.6046	38.446	0.231	38.446	0.198	38.446	0.626	38.446	0.1	38.446	0.116	38.446	-0.071
38.4704	1.959	38.4704	0.78119	38.4704	0.258	38.4704	0.077	38.4704	0.888	38.4704	0.154	38.4704	0.13	38.4704	0.221
38.4947	1.928	38.4947	1.64877	38.4947	0.45	38.4947	0.173	38.4947	0.325	38.4947	0.384	38.4947	0.112	38.4947	0.152
38.519	1.856	38.519	1.79435	38.519	0.137	38.519	0.424	38.519	0.443	38.519	0.366	38.519	0.331	38.519	-0.051
38.5433	1.773	38.5433	1.94093	38.5433	0.072	38.5433	0.108	38.5433	0.592	38.5433	0.328	38.5433	0.706	38.5433	0.169
38.5677	1.907	38.5677	1.51952	38.5677	-0.097	38.5677	0.328	38.5677	0.173	38.5677	0.011	38.5677	1.049	38.5677	0.193
38.592	1.742	38.592	1.6861	38.592	-0.069	38.592	0.476	38.592	0.322	38.592	-0.151	38.592	1.145	38.592	0.227
38.6163	1.784	38.6163	1.60468	38.6163	-0.073	38.6163	0.15	38.6163	0.028	38.6163	0.048	38.6163	0.458	38.6163	0.21
38.6406	1.918	38.6406	1.43126	38.6406	-0.117	38.6406	0.071	38.6406	0.363	38.6406	-0.083	38.6406	0.451	38.6406	0.1
38.665	2.041	38.665	0.91785	38.665	0.045	38.665	-0.1	38.665	0.182	38.665	-0.193	38.665	0.671	38.665	0.021
38.6893	1.845	38.6893	0.73343	38.6893	-0.134	38.6893	-0.004	38.6893	0.28	38.6893	0.078	38.6893	0.644	38.6893	0.097
38.7136	1.969	38.7136	1.07501	38.7136	-0.04	38.7136	0	38.7136	0.213	38.7136	-0.145	38.7136	0.308	38.7136	-0.25
38.7379	1.897	38.7379	0.83959	38.7379	-0.111	38.7379	-0.016	38.7379	0.229	38.7379	-0.183	38.7379	0.178	38.7379	-0.019
38.7622	2.082	38.7622	0.15018	38.7622	0.055	38.7622	-0.012	38.7622	0.193	38.7622	-0.11	38.7622	0.027	38.7622	-0.222
38.7866	1.928	38.7866	0.17276	38.7866	-0.119	38.7866	-0.111	38.7866	0.219	38.7866	-0.026	38.7866	-0.052	38.7866	0.03
38.8109	1.835	38.8109	0.16434	38.8109	0.068	38.8109	0.017	38.8109	0.101	38.8109	0.109	38.8109	-0.047	38.8109	0.044
38.8352	1.835	38.8352	-0.09207	38.8352	0.224	38.8352	0.134	38.8352	-0.048	38.8352	-0.003	38.8352	0.029	38.8352	-0.189
38.8595	2.072	38.8595	0.10551	38.8595	0.318	38.8595	0.17	38.8595	-0.001	38.8595	-0.022	38.8595	0.147	38.8595	0.228
38.8839	1.66	38.8839	0.70509	38.8839	0.32	38.8839	0.339	38.8839	-0.108	38.8839	-0.083	38.8839	0.038	38.8839	0.222
38.9082	2.165	38.9082	0.81968	38.9082	0.384	38.9082	0.106	38.9082	0.003	38.9082	-0.215	38.9082	0.558	38.9082	0.103
38.9325	1.876	38.9325	0.48126	38.9325	0.829	38.9325	0.235	38.9325	-0.06	38.9325	-0.052	38.9325	-0.025	38.9325	0.128
38.9568	2.072	38.9568	0.41084	38.9568	0.645	38.9568	0.384	38.9568	-0.041	38.9568	-0.033	38.9568	0.247	38.9568	0.142
38.9812	1.887	38.9812	0.31943	38.9812	0.389	38.9812	0.141	38.9812	-0.167	38.9812	0.048	38.9812	-0.057	38.9812	0.446
39.0055	2.082	39.0055	0.24901	39.0055	0.556	39.0055	-0.153	39.0055	0.244	39.0055	-0.159	39.0055	-0.104	39.0055	0.399
39.0298	1.887	39.0298	0.54959	39.0298	0.579	39.0298	0.099	39.0298	-0.036	39.0298	-0.057	39.0298	-0.078	39.0298	0.259
39.0541	1.959	39.0541	0.10817	39.0541	0.272	39.0541	0.063	39.0541	0.149	39.0541	0.148	39.0541	-0.135	39.0541	0.027
39.0784	1.918	39.0784	0.16075	39.0784	0.305	39.0784	0.14	39.0784	0.096	39.0784	-0.029	39.0784	0.067	39.0784	0.382
39.1028	2.155	39.1028	-0.03366	39.1028	0.05	39.1028	0.104	39.1028	0.064	39.1028	0.166	39.1028	-0.195	39.1028	0.325
39.1271	2.165	39.1271	-0.07308	39.1271	0.393	39.1271	0.284	39.1271	0.053	39.1271	-0.206	39.1271	0.245	39.1271	0.031
39.1514	1.979	39.1514	0.0415	39.1514	0.076	39.1514	0.207	39.1514	0.052	39.1514	0.009	39.1514	-0.285	39.1514	-0.108
39.1757	2.072	39.1757	0.13608	39.1757	0.047	39.1757	0.037	39.1757	0.01	39.1757	0.06	39.1757	-0.082	39.1757	0.072
39.2001	2.031	39.2001	-0.19233	39.2001	0.081	39.2001	0.248	39.2001	0.246	39.2001	0.152	39.2001	0.048	39.2001	0.294
39.2244	2.309	39.2244	-0.07675	39.2244	-0.102	39.2244	0.079	39.2244	0.091	39.2244	0.305	39.2244	0.107	39.2244	0.051
39.2487	1.825	39.2487	0.04783	39.2487	-0.161	39.2487	0.187	39.2487	-0.053	39.2487	0.243	39.2487	-0.041	39.2487	0.16
39.273	1.918	39.273	-0.02259	39.273	0.131	39.273	0.017	39.273	-0.105	39.273	0.139	39.273	0.688	39.273	0.114
39.2974	2.103	39.2974	0	39.2974	-0.041	39.2974	-0.07	39.2974	-0.038	39.2974	0.303	39.2974	0.963	39.2974	0.408
39.3217	1.948	39.3217	-0.1937	39.3217	-0.028	39.3217	0.008	39.3217	-0.104	39.3217	-0.069	39.3217	1.713	39.3217	0.475
39.346	2.155	39.346	-0.22239	39.346	-0.086	39.346	0.045	39.346	0.005	39.346	-0.079	39.346	0.947	39.346	0.449
39.3703	2.155	39.3703	-0.42609	39.3703	-0.114	39.3703	-0.083	39.3703	-0.041	39.3703	-0.059	39.3703	0.573	39.3703	0.537
39.3947	2.381	39.3947	-0.15578	39.3947	0.026	39.3947	0.098	39.3947	-0.066	39.3947	-0.019	39.3947	1.291	39.3947	0.749
39.419	2.165	39.419	-0.00947	39.419	0.136	39.419	-0.072	39.419	-0.111	39.419	-0.029	39.419	1.083	39.419	0.652
39.4433	1.557	39.4433	-0.19217	39.4433	0.225	39.4433	0.017	39.4433	0.132	39.4433	-0.03	39.4433	0.966	39.4433	0.637
39.4676	2.072	39.4676	-0.37586	39.4676	0.283	39.4676	0.157	39.4676	0.221	39.4676	-0.061	39.4676	0.778	39.4676	0.457
39.4919	2.072	39.4919	-0.27056	39.4919	-0.009	39.4919	0.112	39.4919	0.393	39.4919	-0.123	39.4919	0.611	39.4919	0.618
39.5163	2.041	39.5163	-0.26825	39.5163	-0.075	39.5163	-0.026	39.5163	0.379	39.5163	-0.061	39.5163	0.516	39.5163	0.129
39.5406	1.835	39.5406	-0.35894	39.5406	-0.047	39.5406	-0.103	39.5406	0.221	39.5406	-0.041	39.5406	0.606	39.5406	0.506
39.5649	1.938	39.5649	-0.36664	39.5649	0.053	39.5649	0.347	39.5649	0.001	39.5649	-0.113	39.5649	0.357	39.5649	0.234
39.5892	1.948	39.5892	-0.10634	39.5892	-0.085	39.5892	0.199	39.5892	0.162	39.5892	-0.175	39.5892	0.509	39.5892	0.291
39.6136	1.918	39.6136	-0.19702	39.6136	-0.036	39.6136	-0.114	39.6136	0.2	39.6136	-0.124	39.6136	0.342	39.6136	0.029
39.6379	1.887	39.6379	-0.10172	39.6379	-0.091	39.6379	-0.139	39.6379	0.012	39.6379	-0.093	39.6379	0.041	39.6379	0.118
39.6622	1.711	39.6622	0.20958	39.6622	0.009	39.6622	0.126	39.6622	-0.363	39.6622	-0.123	39.6622	0.596	39.6622	0.114
39.6865	1.918	39.6865	0.18089	39.6865	0.15	39.6865	0.071	39.6865	0.006	39.6865	-0.02	39.6865	0.687	39.6865	0.192
39.7109	1.691	39.7109	0.3072	39.7109	0.137	39.7109	-0.149	39.7109	0.085	39.7109	-0.422	39.7109	1.696	39.7109	-0.131
39.7352	1.639	39.7352	0.41251	39.7352	0.124	39.7352	-0.07	39.7352	-0.123	39.7352	-0.03	39.7352	2.086	39.7352	-0.135
39.7595	1.825	39.7595	0.41481	39.7595	0.039	39.7595	-0.052	39.7595	0.07	39.7595	-0.164	39.7595	2.301	39.7595	-0.013
39.7838	1.784	39.7838	0.11811	39.7838	0.201	39.7838	-0.19	39.7838	0.191	39.7838	-0.184	39.7838	2.599	39.7838	-0.263
39.8081	1.67	39.8081	0.37842	39.8081	0.384	39.8081	0.065	39.8081	-0.028	39.8081	-0.123	39.8081	3.453	39.8081	0.24
39.8325	1.701	39.8325	0.45273	39.8325	0.413	39.8325	0.021	39.8325	0.321	39.8325	-0.247	39.8325	1.977	39.8325	0.331
39.8568	1.495	39.8568	0.31103	39.8568	0.39	39.8568	-0.044	39.8568	0.288	39.8568	0.072	39.8568	1.512	39.8568	0.051
39.8811	1.701	39.8811	0.22034	39.8811	0.717	39.8811	-0.108	39.8811	0.306	39.8811	-0.228	39.8811	1.511	39.8811	0.574
39.9054	1.691	39.9054	0.22264	39.9054	0.736	39.9054	0.053	39.9054	0.14	39.9054	-0.187	39.9054	0.933	39.9054	0.851
39.9298	1.742	39.9298	0.23495	39.9298	0.93	39.9298	-0.032	39.9298	0.385	39.9298	0.204	39.9298	0.427	39.9298	1.179
39.9541	2.072	39.9541	0.27826	39.9541	1	39.9541	-0.149	39.9541	0.404	39.9541	0.152	39.9541	0.23	39.9541	2.414
39.9784	1.742	39.9784	0.22956	39.9784	1.256	39.9784	0.106	39.9784	0.63	39.9784	0.193	39.9784	0.291	39.9784	4.072
40.0027	1.794	40.0027	0.38587	40.0027	1.481	40.0027	-0.011	40.0027	0.752	40.0027	0.264	40.0027	0.322	40.0027	3.617
40.0271	1.763	40.0271	0.45018	40.0271	1.231	40.0271	-0.014	40.0271	0.647	40.0271	0.295	40.0271	0.661	40.0271	1.801
40.0514	1.938	40.0514	0.40148	40.0514	1.013	40.0514	0.086	40.0514	0.574	40.0514	0.594	40.0514	0.527	40.0514	1.243
40.0757	1.907	40.0757	0.16679	40.0757	1.146	40.0757	0.052	40.0757	0.686	40.0757	0.903	40.0757	0.805	40.0757	1.417
40.1	2.103	40.1	0.32309	40.1	1.402	40.1	0.039	40.1	1.325	40.1	1.171	40.1	1.207	40.1	1.9
40.1243	2.144	40.1243	0.38739	40.1243	1.256	40.1243	0.336	40.1243	1.87	40.1243	1.933	40.1243	2.588	40.1243	2.94
40.1487	1.918	40.1487	0.32771	40.1487	1.379	40.1487	0.137	40.1487	2.808	40.1487	1.82	40.1487	3.33	40.1487	2.588
40.173	1.887	40.173	0.71201	40.173	1.439	40.173	0.289	40.173	3.127	40.173	2.17	40.173	3.103	40.173	2.051
40.1973	2.062	40.1973	0.92032	40.1973	1.603	40.1973	0.029	40.1973	2.167	40.1973	1.954	40.1973	3.856	40.1973	2.071
40.2216	1.99	40.2216	1.01562	40.2216	1.664	40.2216	0.346	40.2216	1.909	40.2216	1.789	40.2216	4.052	40.2216	2.08
40.246	2.052	40.246	1.23393	40.246	2.189	40.246	0.642	40.246	2.404	40.246	1.511	40.246	4.537	40.246	2.337
40.2703	2.082	40.2703	1.62824	40.2703	2.61	40.2703	0.568	40.2703	2.486	40.2703	1.346	40.2703	3.836	40.2703	2.037
40.2946	2.082	40.2946	1.58954	40.2946	3.043	40.2946	0.607	40.2946	1.517	40.2946	1.346	40.2946	2.981	40.2946	1.417
40.3189	2	40.3189	1.19984	40.3189	4.197	40.3189	0.955	40.3189	0.827	40.3189	0.8	40.3189	2.672	40.3189	1.777
40.3433	2.103	40.3433	2.19216	40.3433	4.34	40.3433	0.644	40.3433	0.744	40.3433	0.739	40.3433	2.24	40.3433	0.9
40.3676	1.928	40.3676	1.71946	40.3676	5.773	40.3676	0.662	40.3676	0.301	40.3676	0.595	40.3676	1.096	40.3676	1.106
40.3919	2.01	40.3919	1.90776	40.3919	7.329	40.3919	0.825	40.3919	0.209	40.3919	0.554	40.3919	1.19	40.3919	1.219
40.4162	2.237	40.4162	1.86907	40.4162	9.339	40.4162	0.679	40.4162	0.065	40.4162	0.132	40.4162	0.449	40.4162	1.084
40.4405	2.082	40.4405	2.03637	40.4405	9.648	40.4405	0.554	40.4405	0.004	40.4405	0.514	40.4405	0.223	40.4405	0.816
40.4649	1.959	40.4649	1.90468	40.4649	10.277	40.4649	0.397	40.4649	-0.098	40.4649	0.308	40.4649	0.255	40.4649	0.815
40.4892	1.979	40.4892	1.72099	40.4892	9.39	40.4892	0.21	40.4892	-0.036	40.4892	0.732	40.4892	0.132	40.4892	0.351
40.5135	2.186	40.5135	2.01229	40.5135	7.555	40.5135	0.002	40.5135	0.038	40.5135	1.248	40.5135	0.175	40.5135	0.351
40.5378	2.01	40.5378	2.0036	40.5378	6.07	40.5378	0.062	40.5378	-0.013	40.5378	2.537	40.5378	0.052	40.5378	0.691
40.5622	2.227	40.5622	1.49091	40.5622	5.524	40.5622	0.154	40.5622	0.112	40.5622	1.817	40.5622	-0.163	40.5622	1.33
40.5865	2.082	40.5865	1.42121	40.5865	4.638	40.5865	0.121	40.5865	-0.206	40.5865	0.9	40.5865	0.055	40.5865	1.082
40.6108	2.052	40.6108	1.19652	40.6108	3.36	40.6108	0.017	40.6108	-0.106	40.6108	0.983	40.6108	0.057	40.6108	1.36
40.6351	2.134	40.6351	1.31182	40.6351	2.195	40.6351	-0.129	40.6351	0.076	40.6351	1.366	40.6351	-0.23	40.6351	1.257
40.6595	1.907	40.6595	1.10813	40.6595	1.969	40.6595	-0.008	40.6595	-0.174	40.6595	0.913	40.6595	-0.022	40.6595	0.948
40.6838	1.979	40.6838	0.77044	40.6838	1.32	40.6838	0.144	40.6838	0.06	40.6838	0.811	40.6838	0.237	40.6838	1.082
40.7081	1.99	40.7081	0.66974	40.7081	1.609	40.7081	0.06	40.7081	0.006	40.7081	0.524	40.7081	0.332	40.7081	0.495
40.7324	2.052	40.7324	0.68205	40.7324	1.404	40.7324	-0.005	40.7324	0.189	40.7324	0.412	40.7324	0.283	40.7324	0.423
40.7567	1.814	40.7567	0.35435	40.7567	1.518	40.7567	0.179	40.7567	0.197	40.7567	0.207	40.7567	0.079	40.7567	0.269
40.7811	1.969	40.7811	0.58366	40.7811	1.828	40.7811	0.166	40.7811	0.525	40.7811	0.177	40.7811	0.153	40.7811	0.29
40.8054	1.948	40.8054	0.67897	40.8054	1.644	40.8054	0.215	40.8054	0.657	40.8054	-0.007	40.8054	0.197	40.8054	0.393
40.8297	1.649	40.8297	0.78427	40.8297	1.614	40.8297	0.285	40.8297	0.819	40.8297	0.098	40.8297	0.395	40.8297	0.146
40.854	1.66	40.854	0.48757	40.854	1.491	40.854	0.438	40.854	0.663	40.854	0.017	40.854	0.48	40.854	0.219
40.8784	1.67	40.8784	0.34589	40.8784	1.606	40.8784	0.653	40.8784	0.836	40.8784	-0.157	40.8784	-0.105	40.8784	0.333
40.9027	1.784	40.9027	0.77019	40.9027	1.308	40.9027	0.816	40.9027	0.68	40.9027	0.308	40.9027	-0.103	40.9027	0.076
40.927	1.67	40.927	0.40149	40.927	1.299	40.927	0.505	40.927	0.554	40.927	0.351	40.927	0.333	40.927	0.036
40.9513	1.66	40.9513	0.0328	40.9513	1.291	40.9513	0.389	40.9513	0.367	40.9513	0.24	40.9513	0.181	40.9513	0.15
40.9757	1.619	40.9757	0.21011	40.9757	1.354	40.9757	0.491	40.9757	0.273	40.9757	0.087	40.9757	0.153	40.9757	0.357
41	1.608	41	0.16142	41	0.552	41	0.53	41	0.272	41	0.222	41	-0.05	41	0.141
41.0243	1.804	41.0243	0.17372	41.0243	0.677	41.0243	0.683	41.0243	0.219	41.0243	0.276	41.0243	-0.026	41.0243	0.555
41.0486	1.763	41.0486	0.03202	41.0486	0.318	41.0486	0.62	41.0486	0.321	41.0486	0.113	41.0486	0.142	41.0486	0.113
41.0729	1.876	41.0729	0.11633	41.0729	0.361	41.0729	0.681	41.0729	-0.237	41.0729	0.022	41.0729	0.207	41.0729	0.33
41.0973	1.948	41.0973	0.02564	41.0973	0.188	41.0973	0.71	41.0973	-0.062	41.0973	0.107	41.0973	0.035	41.0973	0.249
41.1216	1.804	41.1216	-0.24006	41.1216	-0.006	41.1216	0.843	41.1216	0.174	41.1216	0.067	41.1216	0.173	41.1216	0.426
41.1459	1.423	41.1459	0.12325	41.1459	0.1	41.1459	1.027	41.1459	-0.022	41.1459	-0.034	41.1459	-0.04	41.1459	0.375
41.1702	1.845	41.1702	-0.15245	41.1702	0.143	41.1702	1.119	41.1702	0.379	41.1702	0.082	41.1702	0.097	41.1702	0.325
41.1946	1.959	41.1946	0.08686	41.1946	0.218	41.1946	1.19	41.1946	0.585	41.1946	-0.07	41.1946	-0.043	41.1946	0.079
41.2189	1.567	41.2189	0.00717	41.2189	0.107	41.2189	1.168	41.2189	0.791	41.2189	-0.14	41.2189	-0.122	41.2189	0.4
41.2432	1.649	41.2432	0.13247	41.2432	0.192	41.2432	1.58	41.2432	0.904	41.2432	-0.076	41.2432	0.15	41.2432	0.608
41.2675	1.371	41.2675	-0.16422	41.2675	0.411	41.2675	1.507	41.2675	1.234	41.2675	0.029	41.2675	0.092	41.2675	0.558
41.2919	1.722	41.2919	-0.14091	41.2919	0.352	41.2919	1.63	41.2919	1.09	41.2919	-0.185	41.2919	0.333	41.2919	0.818
41.3162	1.711	41.3162	-0.05661	41.3162	0.283	41.3162	1.093	41.3162	0.564	41.3162	-0.027	41.3162	0.451	41.3162	0.675
41.3405	1.577	41.3405	0.1107	41.3405	0.141	41.3405	1.195	41.3405	1.142	41.3405	0.027	41.3405	0.868	41.3405	0.574
41.3648	1.907	41.3648	0	41.3648	0.412	41.3648	0.937	41.3648	1.245	41.3648	0.153	41.3648	1.161	41.3648	0.792
41.3891	1.608	41.3891	0.08051	41.3891	0.25	41.3891	0.813	41.3891	1.493	41.3891	0.176	41.3891	1.505	41.3891	0.897
41.4135	1.639	41.4135	-0.01394	41.4135	0.13	41.4135	0.431	41.4135	1.7	41.4135	-0.12	41.4135	1.592	41.4135	0.569
41.4378	1.567	41.4378	-0.02643	41.4378	0.484	41.4378	0.74	41.4378	2.598	41.4378	0.089	41.4378	2.092	41.4378	0.726
41.4621	1.68	41.4621	0.11609	41.4621	0.178	41.4621	0.636	41.4621	2.815	41.4621	0.391	41.4621	2.076	41.4621	0.594
41.4864	1.361	41.4864	0.2286	41.4864	0.377	41.4864	0.677	41.4864	3.517	41.4864	0.497	41.4864	2.771	41.4864	0.596
41.5108	1.773	41.5108	0.25715	41.5108	0.422	41.5108	0.347	41.5108	3.889	41.5108	0.345	41.5108	3.106	41.5108	0.939
41.5351	1.557	41.5351	0.05966	41.5351	0.229	41.5351	0.254	41.5351	4.324	41.5351	0.451	41.5351	3.709	41.5351	1.034
41.5594	1.639	41.5594	0.02717	41.5594	0.501	41.5594	0.564	41.5594	4.851	41.5594	0.588	41.5594	3.281	41.5594	0.789
41.5837	1.649	41.5837	0.10768	41.5837	0.391	41.5837	0.553	41.5837	4.729	41.5837	0.313	41.5837	2.09	41.5837	0.987
41.6081	1.742	41.6081	0.12623	41.6081	0.127	41.6081	0.522	41.6081	4.679	41.6081	0.254	41.6081	1.374	41.6081	0.742
41.6324	1.567	41.6324	0.15574	41.6324	0.348	41.6324	0.42	41.6324	3.948	41.6324	0.299	41.6324	1.07	41.6324	0.642
41.6567	1.546	41.6567	0.17426	41.6567	0.496	41.6567	0.574	41.6567	3.713	41.6567	0.096	41.6567	1.508	41.6567	0.614
41.681	1.412	41.681	0.29677	41.681	0.614	41.681	0.472	41.681	3.364	41.681	0.13	41.681	0.462	41.681	0.534
41.7053	1.691	41.7053	0.35628	41.7053	1.185	41.7053	0.42	41.7053	3.48	41.7053	-0.083	41.7053	0.499	41.7053	0.537
41.7297	1.33	41.7297	0.55083	41.7297	1.766	41.7297	0.483	41.7297	2.451	41.7297	-0.142	41.7297	0.298	41.7297	0.241
41.754	1.804	41.754	0.38334	41.754	2.101	41.754	0.318	41.754	2.051	41.754	-0.045	41.754	0.252	41.754	0.099
41.7783	1.381	41.7783	0.50585	41.7783	2.641	41.7783	0.453	41.7783	1.693	41.7783	-0.176	41.7783	0.279	41.7783	0.04
41.8026	1.938	41.8026	0.34937	41.8026	2.532	41.8026	0.258	41.8026	1.015	41.8026	-0.092	41.8026	0.099	41.8026	0.456
41.827	1.505	41.827	0.20291	41.827	2.867	41.827	0.166	41.827	1.017	41.827	0.064	41.827	0.342	41.827	1.448
41.8513	1.485	41.8513	0.35643	41.8513	2.707	41.8513	0.311	41.8513	0.68	41.8513	-0.223	41.8513	0.596	41.8513	1.586
41.8756	1.773	41.8756	0.10694	41.8756	1.928	41.8756	0.033	41.8756	0.786	41.8756	-0.16	41.8756	1.654	41.8756	1.073
41.8999	1.649	41.8999	0.24945	41.8999	2.026	41.8999	0.044	41.8999	0.438	41.8999	-0.271	41.8999	1.691	41.8999	0.757
41.9243	1.794	41.9243	0	41.9243	1.835	41.9243	-0.099	41.9243	0.565	41.9243	0.06	41.9243	1.553	41.9243	0.843
41.9486	1.505	41.9486	0.35748	41.9486	1.613	41.9486	-0.211	41.9486	0.743	41.9486	-0.124	41.9486	1.827	41.9486	0.97
41.9729	1.546	41.9729	0.15796	41.9729	1.659	41.9729	0.109	41.9729	0.664	41.9729	0.095	41.9729	1.422	41.9729	0.973
41.9972	1.68	41.9972	0.49444	41.9972	1.304	41.9972	-0.24	41.9972	0.626	41.9972	0.086	41.9972	1.016	41.9972	0.441
42.0215	1.68	42.0215	0.18192	42.0215	0.979	42.0215	-0.023	42.0215	0.774	42.0215	0.119	42.0215	0.909	42.0215	0.166
42.0459	1.763	42.0459	0.31239	42.0459	0.861	42.0459	0.215	42.0459	0.86	42.0459	0.265	42.0459	0.968	42.0459	0.17
42.0702	1.773	42.0702	0.11287	42.0702	0.774	42.0702	-0.072	42.0702	0.792	42.0702	0.855	42.0702	0.861	42.0702	-0.167
42.0945	1.588	42.0945	0.40835	42.0945	0.624	42.0945	0.001	42.0945	0.651	42.0945	0.723	42.0945	0.775	42.0945	-0.132
42.1188	1.608	42.1188	0.30183	42.1188	0.692	42.1188	-0.008	42.1188	0.305	42.1188	0.601	42.1188	-0.001	42.1188	0.085
42.1432	1.732	42.1432	0.5043	42.1432	0.492	42.1432	-0.13	42.1432	0.175	42.1432	0.542	42.1432	0.212	42.1432	0.002
42.1675	1.691	42.1675	0.43878	42.1675	0.374	42.1675	0.087	42.1675	0.313	42.1675	0.544	42.1675	0.415	42.1675	0.24
42.1918	1.742	42.1918	0.60026	42.1918	0.514	42.1918	-0.086	42.1918	0.163	42.1918	0.917	42.1918	0.186	42.1918	-0.142
42.2161	1.639	42.2161	0.36974	42.2161	0.293	42.2161	-0.013	42.2161	0.25	42.2161	0.59	42.2161	0.141	42.2161	0.013
42.2405	1.794	42.2405	0.3772	42.2405	0.206	42.2405	-0.125	42.2405	0.027	42.2405	0.417	42.2405	0.015	42.2405	0.313
42.2648	1.608	42.2648	0.54868	42.2648	0.408	42.2648	0.083	42.2648	0.393	42.2648	0.161	42.2648	0.064	42.2648	0.066
42.2891	1.639	42.2891	0.58617	42.2891	0.074	42.2891	0.003	42.2891	0.315	42.2891	0.391	42.2891	0.309	42.2891	0.18
42.3134	1.907	42.3134	0.27365	42.3134	0.276	42.3134	-0.088	42.3134	0.155	42.3134	0.517	42.3134	0.1	42.3134	0.489
42.3377	1.629	42.3377	0.24913	42.3377	0.149	42.3377	0.181	42.3377	0.036	42.3377	0.2	42.3377	0.067	42.3377	0.366
42.3621	1.897	42.3621	0.47259	42.3621	0.001	42.3621	0.194	42.3621	0.134	42.3621	0.048	42.3621	0.054	42.3621	0.285
42.3864	1.691	42.3864	0.29407	42.3864	0.183	42.3864	0.134	42.3864	0.181	42.3864	0.03	42.3864	-0.196	42.3864	0.254
42.4107	1.588	42.4107	0.19755	42.4107	0.323	42.4107	0.043	42.4107	0.072	42.4107	0.043	42.4107	-0.053	42.4107	0.224
42.435	1.639	42.435	0.11203	42.435	0.114	42.435	-0.027	42.435	0.202	42.435	0.077	42.435	-0.105	42.435	0.504
42.4594	1.474	42.4594	0.4075	42.4594	0.296	42.4594	0.027	42.4594	0.053	42.4594	0.007	42.4594	0.11	42.4594	0.371
42.4837	1.67	42.4837	0.07398	42.4837	0.107	42.4837	-0.022	42.4837	-0.024	42.4837	-0.021	42.4837	-0.035	42.4837	0.402
42.508	1.361	42.508	0.23546	42.508	0.021	42.508	0.042	42.508	0.023	42.508	0.312	42.508	-0.211	42.508	0.527
42.5323	1.34	42.5323	0.46894	42.5323	0.193	42.5323	0.106	42.5323	-0.023	42.5323	0.016	42.5323	0.066	42.5323	0.58
42.5567	1.619	42.5567	0.34141	42.5567	0.19	42.5567	0.067	42.5567	0.138	42.5567	-0.125	42.5567	-0.203	42.5567	0.818
42.581	1.423	42.581	0.28689	42.581	0.022	42.581	0.173	42.581	0.041	42.581	0.095	42.581	0.085	42.581	0.572
42.6053	1.546	42.6053	0.71537	42.6053	0.019	42.6053	-0.062	42.6053	-0.097	42.6053	-0.16	42.6053	0.167	42.6053	0.687
42.6296	1.722	42.6296	0.66085	42.6296	0.037	42.6296	0.065	42.6296	0.136	42.6296	0.039	42.6296	0.342	42.6296	0.863
42.654	1.392	42.654	0.95632	42.654	-0.079	42.654	-0.108	42.654	-0.084	42.654	-0.184	42.654	0.486	42.654	1.051
42.6783	1.608	42.6783	0.9628	42.6783	-0.103	42.6783	-0.075	42.6783	-0.068	42.6783	-0.14	42.6783	0.806	42.6783	0.846
42.7026	1.371	42.7026	1.10428	42.7026	0.01	42.7026	0.184	42.7026	-0.102	42.7026	0.121	42.7026	0.743	42.7026	0.734
42.7269	1.526	42.7269	0.73976	42.7269	0.132	42.7269	0.093	42.7269	-0.03	42.7269	0.022	42.7269	0.475	42.7269	0.54
42.7512	1.392	42.7512	0.85924	42.7512	-0.002	42.7512	0.125	42.7512	-0.133	42.7512	0.252	42.7512	0.486	42.7512	0.304
42.7756	1.505	42.7756	0.7637	42.7756	0.244	42.7756	0.158	42.7756	0.145	42.7756	0.173	42.7756	0.403	42.7756	0.275
42.7999	1.392	42.7999	0.69818	42.7999	0.233	42.7999	0.252	42.7999	0.321	42.7999	0.331	42.7999	0.393	42.7999	0.36
42.8242	1.443	42.8242	0.71467	42.8242	0.439	42.8242	0.027	42.8242	0.156	42.8242	0.737	42.8242	0.28	42.8242	0.248
42.8485	1.402	42.8485	0.43315	42.8485	0.521	42.8485	0.194	42.8485	0.28	42.8485	1.576	42.8485	0.28	42.8485	0.157
42.8729	1.247	42.8729	0.45061	42.8729	0.623	42.8729	0.165	42.8729	0.425	42.8729	1.714	42.8729	0.209	42.8729	-0.099
42.8972	1.639	42.8972	0.14809	42.8972	0.912	42.8972	0.249	42.8972	0.405	42.8972	1.924	42.8972	0.168	42.8972	-0.024
42.9215	1.443	42.9215	0.10257	42.9215	0.86	42.9215	0.334	42.9215	0.334	42.9215	1.433	42.9215	0.035	42.9215	0.019
42.9458	1.299	42.9458	0.15105	42.9458	1.231	42.9458	0.326	42.9458	0.551	42.9458	1.261	42.9458	0.159	42.9458	0.248
42.9702	1.34	42.9702	0.29152	42.9702	1.344	42.9702	0.173	42.9702	0.583	42.9702	1.193	42.9702	0.531	42.9702	-0.1
42.9945	1.392	42.9945	0	42.9945	1.158	42.9945	0.237	42.9945	0.512	42.9945	0.774	42.9945	0.367	42.9945	-0.252
43.0188	1.629	43.0188	0.38	43.0188	1.076	43.0188	0.456	43.0188	0.482	43.0188	0.583	43.0188	0.687	43.0188	0.11
43.0431	1.392	43.0431	0.05901	43.0431	1.117	43.0431	0.685	43.0431	0.566	43.0431	0.556	43.0431	0.658	43.0431	0.102
43.0674	1.464	43.0674	0.31501	43.0674	1.179	43.0674	0.471	43.0674	0.145	43.0674	0.065	43.0674	0.628	43.0674	-0.041
43.0918	1.34	43.0918	0.45805	43.0918	1.241	43.0918	0.628	43.0918	0.136	43.0918	-0.075	43.0918	0.835	43.0918	0.116
43.1161	1.402	43.1161	0.04506	43.1161	1.098	43.1161	0.61	43.1161	0.241	43.1161	-0.029	43.1161	0.672	43.1161	0.242
43.1404	1.423	43.1404	0.49706	43.1404	1.469	43.1404	0.881	43.1404	0.191	43.1404	-0.025	43.1404	0.724	43.1404	0.223
43.1647	1.423	43.1647	0.61907	43.1647	1.243	43.1647	0.966	43.1647	0.204	43.1647	0.155	43.1647	0.386	43.1647	0.04
43.1891	1.433	43.1891	0.21611	43.1891	1.202	43.1891	1.072	43.1891	0.144	43.1891	-0.026	43.1891	0.367	43.1891	0.321
43.2134	1.526	43.2134	0.28711	43.2134	1.389	43.2134	0.817	43.2134	0.156	43.2134	0.143	43.2134	0.368	43.2134	0.581
43.2377	1.598	43.2377	0.06912	43.2377	0.792	43.2377	0.759	43.2377	0.107	43.2377	0.416	43.2377	0.133	43.2377	0.439
43.262	1.629	43.262	0.32612	43.262	0.916	43.262	0.823	43.262	0.274	43.262	0.193	43.262	0.125	43.262	0.73
43.2864	1.392	43.2864	0.30416	43.2864	0.732	43.2864	0.476	43.2864	0.194	43.2864	0.188	43.2864	-0.069	43.2864	0.516
43.3107	1.505	43.3107	0.03417	43.3107	0.929	43.3107	0.644	43.3107	0.156	43.3107	0.327	43.3107	0.232	43.3107	0.364
43.335	1.557	43.335	-0.09083	43.335	1.126	43.335	0.565	43.335	0.158	43.335	0.074	43.335	0.265	43.335	0.181
43.3593	1.227	43.3593	0.05217	43.3593	1.086	43.3593	0.671	43.3593	0.357	43.3593	-0.066	43.3593	0.288	43.3593	0.173
43.3836	1.361	43.3836	-0.05182	43.3836	1.479	43.3836	0.664	43.3836	0.37	43.3836	0.228	43.3836	0.176	43.3836	0.197
43.408	1.505	43.408	-0.11478	43.408	1.336	43.408	0.822	43.408	0.425	43.408	0.325	43.408	0.024	43.408	0.21
43.4323	1.299	43.4323	0.09022	43.4323	1.368	43.4323	0.62	43.4323	0.356	43.4323	-0.092	43.4323	-0.015	43.4323	0.007
43.4566	1.33	43.4566	0.17123	43.4566	1.009	43.4566	0.561	43.4566	0.318	43.4566	0.181	43.4566	0.091	43.4566	0.102
43.4809	1.66	43.4809	0.05623	43.4809	0.877	43.4809	0.297	43.4809	0.342	43.4809	-0.062	43.4809	0.022	43.4809	0.178
43.5053	1.371	43.5053	-0.00673	43.5053	0.765	43.5053	0.27	43.5053	0.201	43.5053	-0.18	43.5053	0.066	43.5053	0.315
43.5296	1.402	43.5296	0.27028	43.5296	0.684	43.5296	0.263	43.5296	0.112	43.5296	-0.057	43.5296	-0.107	43.5296	0.06
43.5539	1.454	43.5539	0.13528	43.5539	0.439	43.5539	0.246	43.5539	0.147	43.5539	0.077	43.5539	0.082	43.5539	0.105
43.5782	1.093	43.5782	0.17429	43.5782	0.462	43.5782	0.137	43.5782	0.212	43.5782	0.201	43.5782	-0.122	43.5782	-0.078
43.6026	1.495	43.6026	0.23011	43.6026	0.423	43.6026	0.038	43.6026	0.052	43.6026	0.005	43.6026	0.201	43.6026	0.039
43.6269	1.485	43.6269	-0.0887	43.6269	0.414	43.6269	0.093	43.6269	0.035	43.6269	-0.016	43.6269	0.05	43.6269	0.094
43.6512	1.186	43.6512	0.1295	43.6512	0.283	43.6512	0.036	43.6512	0.08	43.6512	0.128	43.6512	0.29	43.6512	0.211
43.6755	1.34	43.6755	0.10969	43.6755	0.512	43.6755	0.133	43.6755	0.167	43.6755	0.015	43.6755	0.438	43.6755	0.349
43.6998	1.309	43.6998	0.19389	43.6998	0.267	43.6998	0.281	43.6998	0.285	43.6998	-0.026	43.6998	0.348	43.6998	0.063
43.7242	1.289	43.7242	0.24609	43.7242	0.393	43.7242	0.11	43.7242	0.104	43.7242	0.087	43.7242	0.465	43.7242	-0.17
43.7485	1.144	43.7485	0.17529	43.7485	0.251	43.7485	0.032	43.7485	0.171	43.7485	0.067	43.7485	0.088	43.7485	-0.055
43.7728	1.464	43.7728	0.12548	43.7728	0.089	43.7728	0.047	43.7728	0.103	43.7728	0.016	43.7728	0.256	43.7728	0.09
43.7971	1.227	43.7971	0.41468	43.7971	0.164	43.7971	0.052	43.7971	0.221	43.7971	-0.128	43.7971	0.013	43.7971	0.03
43.8215	1.196	43.8215	0.44688	43.8215	0.239	43.8215	0.067	43.8215	0.082	43.8215	0.017	43.8215	0.109	43.8215	0.042
43.8458	1.299	43.8458	0.23208	43.8458	0.253	43.8458	-0.032	43.8458	-0.005	43.8458	0.079	43.8458	0.155	43.8458	0.219
43.8701	1.093	43.8701	0.22227	43.8701	0.524	43.8701	0.014	43.8701	0.144	43.8701	0.09	43.8701	-0.006	43.8701	-0.285
43.8944	1.237	43.8944	0.16247	43.8944	0.156	43.8944	-0.012	43.8944	-0.098	43.8944	0.08	43.8944	0.07	43.8944	-0.098
43.9188	1.237	43.9188	0.38967	43.9188	0.169	43.9188	-0.1	43.9188	0.134	43.9188	-0.064	43.9188	0.208	43.9188	0.059
43.9431	1.309	43.9431	0.23687	43.9431	0.09	43.9431	-0.031	43.9431	0.377	43.9431	0.091	43.9431	-0.004	43.9431	0.04
43.9674	1.33	43.9674	0.31006	43.9674	0.269	43.9674	0.162	43.9674	0.259	43.9674	0.051	43.9674	0.176	43.9674	0.176
43.9917	1.361	43.9917	0.41426	43.9917	0.149	43.9917	0.024	43.9917	0.193	43.9917	0.175	43.9917	-0.016	43.9917	-0.131
44.016	1.082	44.016	0.35345	44.016	-0.044	44.016	0.083	44.016	0.168	44.016	0.166	44.016	0.102	44.016	0.077
44.0404	1.124	44.0404	0.23065	44.0404	0.042	44.0404	0.059	44.0404	0.442	44.0404	-0.143	44.0404	0.035	44.0404	0.12
44.0647	1.103	44.0647	0.00585	44.0647	0.056	44.0647	0.067	44.0647	0.035	44.0647	0.085	44.0647	0.071	44.0647	0.349
44.089	1.392	44.089	0.06805	44.089	0.112	44.089	0.012	44.089	0.31	44.089	0.23	44.089	0.199	44.089	0.228
44.1133	1.216	44.1133	0.12124	44.1133	0.095	44.1133	0.391	44.1133	0.192	44.1133	-0.119	44.1133	-0.012	44.1133	0.323
44.1377	1.237	44.1377	0.05044	44.1377	0.109	44.1377	0.409	44.1377	0.168	44.1377	-0.211	44.1377	0.168	44.1377	0.5
44.162	1.155	44.162	-0.13436	44.162	0.052	44.162	0.53	44.162	0.226	44.162	0.004	44.162	-0.054	44.162	0.317
44.1863	1.082	44.1863	0.10384	44.1863	0.2	44.1863	0.641	44.1863	0.078	44.1863	-0.08	44.1863	0.209	44.1863	0.144
44.2106	1.082	44.2106	0.41503	44.2106	0.256	44.2106	0.566	44.2106	0.075	44.2106	-0.061	44.2106	0.029	44.2106	-0.08
44.235	1.237	44.235	0.09623	44.235	0.168	44.235	0.605	44.235	0.164	44.235	-0.228	44.235	0.22	44.235	0.16
44.2593	1.206	44.2593	0.14943	44.2593	0.059	44.2593	0.932	44.2593	0.027	44.2593	0.049	44.2593	-0.156	44.2593	-0.044
44.2836	1.206	44.2836	0.27362	44.2836	0.084	44.2836	0.868	44.2836	0.034	44.2836	-0.056	44.2836	0.221	44.2836	0.031
44.3079	1.031	44.3079	0.10982	44.3079	0.14	44.3079	0.288	44.3079	-0.134	44.3079	-0.192	44.3079	-0.011	44.3079	-0.368
44.3322	1.124	44.3322	0.11102	44.3322	0.073	44.3322	0.41	44.3322	-0.028	44.3322	0.034	44.3322	-0.211	44.3322	0.356
44.3566	1.299	44.3566	0.27722	44.3566	0.304	44.3566	0.377	44.3566	0.047	44.3566	-0.184	44.3566	0.016	44.3566	0.369
44.3809	1.031	44.3809	0.38141	44.3809	0.299	44.3809	0.375	44.3809	-0.115	44.3809	0.041	44.3809	0.191	44.3809	0.094
44.4052	1.134	44.4052	0.11461	44.4052	0.19	44.4052	0.29	44.4052	0.177	44.4052	-0.177	44.4052	0.047	44.4052	-0.058
44.4295	1.134	44.4295	0.14681	44.4295	0.03	44.4295	0.226	44.4295	0.047	44.4295	-0.044	44.4295	0.068	44.4295	0.09
44.4539	1.052	44.4539	0.33401	44.4539	0.345	44.4539	0.534	44.4539	0.163	44.4539	-0.076	44.4539	0.182	44.4539	-0.196
44.4782	1.32	44.4782	0.1492	44.4782	0.092	44.4782	0.233	44.4782	-0.101	44.4782	0.016	44.4782	-0.116	44.4782	-0.084
44.5025	0.969	44.5025	0.3364	44.5025	0.005	44.5025	0.128	44.5025	0.068	44.5025	-0.037	44.5025	-0.084	44.5025	-0.096
44.5268	0.856	44.5268	0.21359	44.5268	0	44.5268	0.085	44.5268	-0.032	44.5268	-0.151	44.5268	-0.084	44.5268	-0.098
44.5512	1.124	44.5512	0.29779	44.5512	-0.17	44.5512	0.187	44.5512	0.199	44.5512	0.012	44.5512	0.041	44.5512	-0.099
44.5755	1.134	44.5755	0.31899	44.5755	0	44.5755	0.196	44.5755	-0.055	44.5755	-0.081	44.5755	0.001	44.5755	0.105
44.5998	0.845	44.5998	0.52619	44.5998	-0.18	44.5998	0.184	44.5998	0.011	44.5998	0.042	44.5998	0.115	44.5998	-0.051
44.6241	1.155	44.6241	0.24938	44.6241	0.012	44.6241	0.131	44.6241	-0.098	44.6241	-0.083	44.6241	-0.069	44.6241	0.03
44.6484	1.124	44.6484	0.25058	44.6484	0.069	44.6484	-0.087	44.6484	-0.009	44.6484	-0.063	44.6484	-0.058	44.6484	0.029
44.6728	1.216	44.6728	0.10778	44.6728	0.157	44.6728	-0.026	44.6728	-0.095	44.6728	0.111	44.6728	-0.097	44.6728	0.017
44.6971	1.124	44.6971	0.05698	44.6971	0.184	44.6971	0.261	44.6971	0.098	44.6971	-0.25	44.6971	-0.075	44.6971	-0.035
44.7214	1	44.7214	-0.09583	44.7214	0.097	44.7214	0.002	44.7214	0.064	44.7214	-0.075	44.7214	0.07	44.7214	0.304
44.7457	0.959	44.7457	-0.08463	44.7457	0.134	44.7457	0.094	44.7457	0.03	44.7457	-0.055	44.7457	0	44.7457	0.344
44.7701	1.093	44.7701	-0.13543	44.7701	0.006	44.7701	0	44.7701	0.026	44.7701	0.037	44.7701	0.043	44.7701	0.219
44.7944	1.237	44.7944	0.10276	44.7944	0.167	44.7944	-0.104	44.7944	0.096	44.7944	0.036	44.7944	-0.028	44.7944	0.208
44.8187	1.165	44.8187	0.16596	44.8187	-0.115	44.8187	0.009	44.8187	0.031	44.8187	-0.129	44.8187	0.026	44.8187	-0.144
44.843	1.155	44.843	0.34316	44.843	0.066	44.843	-0.074	44.843	0.204	44.843	-0.15	44.843	-0.065	44.843	0.155
44.8674	1.186	44.8674	0.28236	44.8674	0.3	44.8674	-0.095	44.8674	0.17	44.8674	-0.109	44.8674	0.05	44.8674	0.02
44.8917	1.268	44.8917	0.31455	44.8917	0.275	44.8917	-0.003	44.8917	0.106	44.8917	0.035	44.8917	-0.05	44.8917	0.194
44.916	1.041	44.916	0.45975	44.916	0.395	44.916	-0.096	44.916	0.217	44.916	0.055	44.916	0.137	44.916	-0.023
44.9403	1.206	44.9403	0.20295	44.9403	0.33	44.9403	0.192	44.9403	0.142	44.9403	-0.192	44.9403	-0.067	44.9403	0.038
44.9646	1.124	44.9646	0.49314	44.9646	0.337	44.9646	0.027	44.9646	0.078	44.9646	0.055	44.9646	0.018	44.9646	-0.117
44.989	1.041	44.989	0.63834	44.989	0.385	44.989	0.099	44.989	0.128	44.989	0.055	44.989	0.165	44.989	-0.055
45.0133	1.237	45.0133	0.34054	45.0133	0.423	45.0133	0.161	45.0133	-0.08	45.0133	0.179	45.0133	-0.1	45.0133	0.367
45.0376	1.237	45.0376	0.30073	45.0376	0.379	45.0376	0.398	45.0376	0.186	45.0376	-0.037	45.0376	0.109	45.0376	-0.025
45.0619	1.113	45.0619	0.09593	45.0619	0.355	45.0619	0.387	45.0619	0.236	45.0619	-0.006	45.0619	0.173	45.0619	0.129
45.0863	1.062	45.0863	0.17913	45.0863	0.414	45.0863	0.13	45.0863	0.183	45.0863	0.107	45.0863	0.083	45.0863	-0.046
45.1106	1.227	45.1106	-0.05667	45.1106	0.503	45.1106	0.532	45.1106	0.295	45.1106	0.241	45.1106	0.169	45.1106	0.428
45.1349	1.247	45.1349	-0.14848	45.1349	0.377	45.1349	0.109	45.1349	0.108	45.1349	0.932	45.1349	0.089	45.1349	-0.108
45.1592	1.082	45.1592	0.10074	45.1592	0.549	45.1592	0.357	45.1592	0.395	45.1592	1.376	45.1592	0.298	45.1592	-0.077
45.1836	0.99	45.1836	0.0301	45.1836	0.423	45.1836	0.306	45.1836	0.621	45.1836	0.985	45.1836	0.219	45.1836	0.036
45.2079	1.175	45.2079	0.01047	45.2079	0.482	45.2079	0.832	45.2079	0.816	45.2079	0.408	45.2079	-0.128	45.2079	0.263
45.2322	1.175	45.2322	0.09483	45.2322	0.459	45.2322	0.698	45.2322	0.464	45.2322	0.192	45.2322	-0.083	45.2322	0.222
45.2565	1.103	45.2565	-0.13081	45.2565	0.55	45.2565	0.524	45.2565	0.567	45.2565	0.522	45.2565	0.095	45.2565	0.181
45.2808	1.165	45.2808	0.25155	45.2808	0.485	45.2808	0.555	45.2808	0.288	45.2808	0.626	45.2808	-0.015	45.2808	-0.056
45.3052	1.196	45.3052	0.15992	45.3052	0.7	45.3052	0.545	45.3052	0.194	45.3052	0.359	45.3052	-0.001	45.3052	0.099
45.3295	1.196	45.3295	0.34728	45.3295	0.543	45.3295	0.443	45.3295	0.266	45.3295	0.071	45.3295	0.22	45.3295	0.12
45.3538	1.021	45.3538	0.34864	45.3538	0.592	45.3538	0.825	45.3538	0.224	45.3538	0.164	45.3538	0.399	45.3538	0.285
45.3781	0.969	45.3781	0.08201	45.3781	0.477	45.3781	0.496	45.3781	0.121	45.3781	-0.051	45.3781	-0.051	45.3781	1.111
45.4025	1.32	45.4025	0.54737	45.4025	0.454	45.4025	0.415	45.4025	0.08	45.4025	-0.03	45.4025	0.077	45.4025	1.668
45.4268	1.041	45.4268	0.23974	45.4268	0.576	45.4268	0.426	45.4268	0.049	45.4268	-0.132	45.4268	-0.115	45.4268	1.566
45.4511	1	45.4511	0.5291	45.4511	0.564	45.4511	0.489	45.4511	-0.064	45.4511	0.106	45.4511	0.075	45.4511	1.092
45.4754	1.227	45.4754	0.46846	45.4754	0.686	45.4754	0.181	45.4754	0.101	45.4754	0.076	45.4754	0.027	45.4754	0.711
45.4998	1.165	45.4998	0.32583	45.4998	0.922	45.4998	0.161	45.4998	-0.012	45.4998	-0.057	45.4998	0.094	45.4998	0.877
45.5241	1.062	45.5241	0.35819	45.5241	0.807	45.5241	0.132	45.5241	0.019	45.5241	-0.159	45.5241	0.129	45.5241	0.59
45.5484	1.268	45.5484	0.17355	45.5484	1.063	45.5484	0.071	45.5484	0.051	45.5484	-0.076	45.5484	0.133	45.5484	0.694
45.5727	1.196	45.5727	0.41192	45.5727	1.381	45.5727	0.073	45.5727	0.165	45.5727	-0.157	45.5727	0.097	45.5727	0.519
45.5971	1.052	45.5971	0.07328	45.5971	1.257	45.5971	0.188	45.5971	0.186	45.5971	-0.064	45.5971	-0.002	45.5971	0.304
45.6214	1.268	45.6214	0.16764	45.6214	1.359	45.6214	0.23	45.6214	0.053	45.6214	-0.042	45.6214	0.385	45.6214	-0.066
45.6457	1.227	45.6457	0.10701	45.6457	1.234	45.6457	-0.046	45.6457	0.023	45.6457	-0.031	45.6457	0.132	45.6457	-0.127
45.67	0.979	45.67	0.26337	45.67	0.954	45.67	0.368	45.67	0.035	45.67	0.125	45.67	0.116	45.67	0.287
45.6943	1.268	45.6943	0.02773	45.6943	0.974	45.6943	-0.208	45.6943	-0.108	45.6943	-0.07	45.6943	0.142	45.6943	0.361
45.7187	1.196	45.7187	0.1221	45.7187	0.912	45.7187	-0.062	45.7187	0.068	45.7187	0.013	45.7187	0.137	45.7187	-0.112
45.743	1.093	45.743	0.21546	45.743	0.911	45.743	-0.018	45.743	-0.054	45.743	-0.027	45.743	-0.064	45.743	0.126
45.7673	1.237	45.7673	-0.15418	45.7673	0.766	45.7673	0.076	45.7673	-0.021	45.7673	-0.067	45.7673	-0.121	45.7673	0.128
45.7916	1.309	45.7916	0.27019	45.7916	0.734	45.7916	0.027	45.7916	-0.05	45.7916	-0.138	45.7916	0.348	45.7916	0.14
45.816	1.433	45.816	-0.14145	45.816	0.61	45.816	0.039	45.816	-0.09	45.816	-0.064	45.816	0.024	45.816	0.399
45.8403	1.227	45.8403	0.15892	45.8403	0.445	45.8403	0.114	45.8403	0.053	45.8403	0.061	45.8403	0.226	45.8403	0.143
45.8646	1.351	45.8646	0.16028	45.8646	0.414	45.8646	0.023	45.8646	0.02	45.8646	-0.226	45.8646	0.097	45.8646	0.104
45.8889	1.402	45.8889	0.06964	45.8889	0.393	45.8889	0.108	45.8889	0.059	45.8889	0.125	45.8889	0.103	45.8889	0.539
45.9133	1.402	45.9133	0.11201	45.9133	0.372	45.9133	0.306	45.9133	0.037	45.9133	0.003	45.9133	0.171	45.9133	0.489
45.9376	1.247	45.9376	0.07237	45.9376	0.444	45.9376	0.37	45.9376	-0.078	45.9376	-0.109	45.9376	0.393	45.9376	0.439
45.9619	1.485	45.9619	0.09373	45.9619	0.651	45.9619	0.394	45.9619	-0.048	45.9619	0.12	45.9619	0.43	45.9619	0.761
45.9862	1.237	45.9862	0.24009	45.9862	0.455	45.9862	0.376	45.9862	-0.008	45.9862	0.049	45.9862	0.333	45.9862	0.794
46.0105	1.165	46.0105	0.25146	46.0105	0.311	46.0105	0.739	46.0105	-0.123	46.0105	-0.114	46.0105	0.391	46.0105	0.91
46.0349	1.34	46.0349	0.35582	46.0349	0.383	46.0349	0.804	46.0349	0.134	46.0349	-0.009	46.0349	0.469	46.0349	0.922
46.0592	1.124	46.0592	0.26419	46.0592	0.301	46.0592	1.291	46.0592	0.03	46.0592	0.075	46.0592	0.558	46.0592	0.966
46.0835	1.34	46.0835	0.37955	46.0835	0.188	46.0835	1.665	46.0835	-0.053	46.0835	0.18	46.0835	0.4	46.0835	1.143
46.1078	1.32	46.1078	0.32891	46.1078	0.21	46.1078	1.946	46.1078	0.06	46.1078	-0.23	46.1078	0.54	46.1078	0.806
46.1322	1.402	46.1322	0.44328	46.1322	0.159	46.1322	2.207	46.1322	0.018	46.1322	-0.156	46.1322	0.722	46.1322	0.983
46.1565	1.278	46.1565	0.42464	46.1565	0.221	46.1565	2.365	46.1565	0.017	46.1565	-0.075	46.1565	0.409	46.1565	1.017
46.1808	1.639	46.1808	0.271	46.1808	-0.036	46.1808	2.523	46.1808	0.038	46.1808	-0.076	46.1808	0.313	46.1808	0.535
46.2051	1.268	46.2051	0.32436	46.2051	0.172	46.2051	1.845	46.2051	0.13	46.2051	-0.253	46.2051	0.341	46.2051	0.414
46.2295	1.32	46.2295	0.17073	46.2295	0.224	46.2295	1.952	46.2295	0.079	46.2295	0.076	46.2295	0.471	46.2295	0.592
46.2538	1.175	46.2538	0.11009	46.2538	0.04	46.2538	2.099	46.2538	0.027	46.2538	0.033	46.2538	0.509	46.2538	0.553
46.2781	1.412	46.2781	0.40046	46.2781	-0.155	46.2781	1.979	46.2781	0.048	46.2781	-0.133	46.2781	0.269	46.2781	0.216
46.3024	1.381	46.3024	0.18482	46.3024	0.011	46.3024	1.581	46.3024	0.234	46.3024	-0.041	46.3024	-0.012	46.3024	0.188
46.3267	1.371	46.3267	0.14518	46.3267	0.239	46.3267	1.553	46.3267	-0.085	46.3267	-0.166	46.3267	-0.108	46.3267	0.232
46.3511	1.155	46.3511	-0.23445	46.3511	0.014	46.3511	1.124	46.3511	-0.054	46.3511	0.163	46.3511	0.01	46.3511	0.039
46.3754	1.134	46.3754	-0.06809	46.3754	-0.057	46.3754	1.086	46.3754	-0.023	46.3754	0.038	46.3754	0.107	46.3754	-0.122
46.3997	1.124	46.3997	-0.19073	46.3997	0.048	46.3997	0.709	46.3997	-0.012	46.3997	0.471	46.3997	0.122	46.3997	-0.143
46.424	1.113	46.424	0.11963	46.424	-0.064	46.424	0.733	46.424	0.123	46.424	0.717	46.424	0.209	46.424	0.403
46.4484	1	46.4484	0.018	46.4484	-0.227	46.4484	0.923	46.4484	-0.041	46.4484	0.49	46.4484	0.172	46.4484	0.197
46.4727	1.041	46.4727	-0.07364	46.4727	0.072	46.4727	0.648	46.4727	-0.112	46.4727	0.293	46.4727	0.187	46.4727	0.258
46.497	1.175	46.497	-0.03027	46.497	0.04	46.497	0.528	46.497	0.085	46.497	0.097	46.497	0.491	46.497	0.083
46.5213	1.103	46.5213	-0.12191	46.5213	0.081	46.5213	0.564	46.5213	0.025	46.5213	0.199	46.5213	0.331	46.5213	0.052
46.5457	1.258	46.5457	-0.00729	46.5457	0.018	46.5457	0.289	46.5457	-0.077	46.5457	0.466	46.5457	0.151	46.5457	0.3
46.57	1.227	46.57	-0.10833	46.57	-0.106	46.57	0.335	46.57	0.028	46.57	0.301	46.57	0.259	46.57	0.238
46.5943	1.041	46.5943	0.08963	46.5943	0.059	46.5943	0.102	46.5943	0.04	46.5943	0.187	46.5943	0.429	46.5943	-0.03
46.6186	1.031	46.6186	0.07059	46.6186	0.275	46.6186	0.302	46.6186	-0.155	46.6186	0.176	46.6186	0.641	46.6186	0.229
46.6429	1.165	46.6429	0.13455	46.6429	0.038	46.6429	0.286	46.6429	0.002	46.6429	0.145	46.6429	1.007	46.6429	0.105
46.6673	1.289	46.6673	0.00252	46.6673	0.141	46.6673	0.188	46.6673	0.055	46.6673	0.166	46.6673	0.992	46.6673	0.332
46.6916	1.237	46.6916	0.20048	46.6916	0.069	46.6916	0.007	46.6916	-0.107	46.6916	0.103	46.6916	0.822	46.6916	0.137
46.7159	1.01	46.7159	-0.07556	46.7159	0.121	46.7159	0.011	46.7159	0.018	46.7159	0.103	46.7159	0.601	46.7159	0.21
46.7402	1.062	46.7402	0.16341	46.7402	0.266	46.7402	0.088	46.7402	-0.093	46.7402	-0.113	46.7402	0.462	46.7402	0.252
46.7646	0.938	46.7646	0.18638	46.7646	0.286	46.7646	0.041	46.7646	-0.014	46.7646	0.01	46.7646	0.489	46.7646	0.263
46.7889	1.289	46.7889	-0.00766	46.7889	0.091	46.7889	0.036	46.7889	-0.132	46.7889	-0.093	46.7889	0.546	46.7889	0.346
46.8132	1.144	46.8132	0.3133	46.8132	0.05	46.8132	0.092	46.8132	0.05	46.8132	-0.103	46.8132	0.511	46.8132	0.233
46.8375	0.948	46.8375	0.23326	46.8375	0.102	46.8375	-0.047	46.8375	-0.067	46.8375	-0.113	46.8375	0.393	46.8375	0.636
46.8619	1.175	46.8619	0.15223	46.8619	0.124	46.8619	0.103	46.8619	0.228	46.8619	-0.062	46.8619	0.028	46.8619	0.359
46.8862	1.072	46.8862	0.15419	46.8862	0.351	46.8862	-0.078	46.8862	-0.043	46.8862	-0.165	46.8862	0.406	46.8862	0.484
46.9105	1.01	46.9105	0.25915	46.9105	0.228	46.9105	0.113	46.9105	0.036	46.9105	-0.051	46.9105	0.258	46.9105	0.629
46.9348	1.124	46.9348	0.17911	46.9348	0.075	46.9348	0.098	46.9348	0.249	46.9348	0.063	46.9348	0.429	46.9348	0.878
46.9591	1.155	46.9591	0.32508	46.9591	0.096	46.9591	0.01	46.9591	0.277	46.9591	-0.02	46.9591	0.271	46.9591	0.693
46.9835	1.113	46.9835	0.06904	46.9835	0.046	46.9835	-0.17	46.9835	0.346	46.9835	0.053	46.9835	0.123	46.9835	0.437
47.0078	1.062	47.0078	0.25701	47.0078	0.202	47.0078	-0.01	47.0078	0.869	47.0078	0.27	47.0078	0.253	47.0078	0.51
47.0321	1.186	47.0321	0.06297	47.0321	0.141	47.0321	0.17	47.0321	0.959	47.0321	0.569	47.0321	0.332	47.0321	0.44
47.0564	0.99	47.0564	0.54993	47.0564	0.174	47.0564	0.021	47.0564	1.194	47.0564	0.817	47.0564	0.205	47.0564	0.42
47.0808	1.216	47.0808	0.3659	47.0808	-0.011	47.0808	0.274	47.0808	1.459	47.0808	0.766	47.0808	-0.108	47.0808	0.133
47.1051	1.186	47.1051	0.25486	47.1051	-0.05	47.1051	0.052	47.1051	1.353	47.1051	0.519	47.1051	-0.049	47.1051	0.444
47.1294	1.361	47.1294	0.26682	47.1294	-0.028	47.1294	0.243	47.1294	1.465	47.1294	0.272	47.1294	-0.083	47.1294	0.322
47.1537	1.433	47.1537	0.54678	47.1537	-0.057	47.1537	0.331	47.1537	1.04	47.1537	0.438	47.1537	-0.097	47.1537	0.107
47.1781	1.32	47.1781	0.54875	47.1781	0.006	47.1781	0.584	47.1781	1.213	47.1781	0.521	47.1781	-0.11	47.1781	-0.087
47.2024	1.289	47.2024	0.60271	47.2024	0.029	47.2024	0.147	47.2024	0.984	47.2024	0.377	47.2024	0.135	47.2024	0.286
47.2267	1.268	47.2267	0.85168	47.2267	0.289	47.2267	0.348	47.2267	0.528	47.2267	0.595	47.2267	0.06	47.2267	0.195
47.251	1.526	47.251	0.94664	47.251	0.043	47.251	0.406	47.251	0.547	47.251	0.193	47.251	0.243	47.251	0.311
47.2753	1.629	47.2753	0.8766	47.2753	-0.099	47.2753	0.257	47.2753	0.453	47.2753	0.06	47.2753	0.302	47.2753	0.766
47.2997	1.402	47.2997	0.91957	47.2997	-0.115	47.2997	0.284	47.2997	0.307	47.2997	0.587	47.2997	0.268	47.2997	0.603
47.324	1.216	47.324	1.03553	47.324	0.24	47.324	0.29	47.324	0.182	47.324	0.124	47.324	0.163	47.324	0.492
47.3483	1.32	47.3483	1.03749	47.3483	0.379	47.3483	0.316	47.3483	0.17	47.3483	0.166	47.3483	-0.046	47.3483	0.34
47.3726	1.33	47.3726	0.82245	47.3726	0.022	47.3726	0.189	47.3726	0.169	47.3726	0.116	47.3726	0.241	47.3726	0.424
47.397	1.32	47.397	0.95842	47.397	0.027	47.397	0.112	47.397	0.23	47.397	0.282	47.397	0.383	47.397	0.509
47.4213	1.103	47.4213	0.79538	47.4213	0.084	47.4213	0.129	47.4213	0.291	47.4213	0.201	47.4213	0.298	47.4213	0.109
47.4456	1.258	47.4456	0.57034	47.4456	-0.087	47.4456	0.197	47.4456	0.104	47.4456	0.223	47.4456	-0.003	47.4456	0.143
47.4699	1.299	47.4699	0.61431	47.4699	0.032	47.4699	0.08	47.4699	0.464	47.4699	0.008	47.4699	0.088	47.4699	0.032
47.4943	1.186	47.4943	0.6781	47.4943	-0.056	47.4943	0.2	47.4943	0.072	47.4943	0.411	47.4943	0.148	47.4943	0.22
47.5186	1.093	47.5186	0.51161	47.5186	0.207	47.5186	0.134	47.5186	0.164	47.5186	0.299	47.5186	-0.152	47.5186	-0.087
47.5429	1.082	47.5429	0.36512	47.5429	0.078	47.5429	0.089	47.5429	0.164	47.5429	0.301	47.5429	0.475	47.5429	-0.012
47.5672	0.948	47.5672	0.28163	47.5672	0.115	47.5672	0.364	47.5672	0.091	47.5672	0.137	47.5672	0.277	47.5672	0.197
47.5915	0.918	47.5915	0.41414	47.5915	0.275	47.5915	0.361	47.5915	0.153	47.5915	0.077	47.5915	0.152	47.5915	0.2
47.6159	1.216	47.6159	0.34065	47.6159	0.59	47.6159	0.254	47.6159	0.081	47.6159	0.172	47.6159	0.367	47.6159	0.121
47.6402	1.32	47.6402	0.38016	47.6402	0.204	47.6402	0.076	47.6402	0.009	47.6402	0.565	47.6402	0.273	47.6402	0.123
47.6645	1.072	47.6645	0.27567	47.6645	0.209	47.6645	0.237	47.6645	0.071	47.6645	0.392	47.6645	0.334	47.6645	0.312
47.6888	1.155	47.6888	0.41818	47.6888	0.524	47.6888	0.09	47.6888	0.009	47.6888	0.342	47.6888	0.508	47.6888	0.202
47.7132	1.361	47.7132	0.32369	47.7132	0.252	47.7132	0.221	47.7132	-0.083	47.7132	0.457	47.7132	0.311	47.7132	0.081
47.7375	1.093	47.7375	0.1882	47.7375	0.382	47.7375	0.403	47.7375	0.072	47.7375	0.449	47.7375	0.279	47.7375	0.187
47.7618	1.237	47.7618	0.21771	47.7618	0.429	47.7618	0.317	47.7618	0.042	47.7618	0.997	47.7618	0.433	47.7618	-0.036
47.7861	0.959	47.7861	0.17522	47.7861	0.373	47.7861	0.366	47.7861	-0.071	47.7861	1.484	47.7861	0.247	47.7861	0.153
47.8105	1.186	47.8105	0.29773	47.8105	0.369	47.8105	0.435	47.8105	-0.039	47.8105	1.548	47.8105	0.556	47.8105	0.125
47.8348	1.021	47.8348	0.41924	47.8348	0.355	47.8348	0.67	47.8348	0.086	47.8348	1.106	47.8348	0.555	47.8348	0.201
47.8591	1.124	47.8591	0.34575	47.8591	0.341	47.8591	0.595	47.8591	0.334	47.8591	0.758	47.8591	0.41	47.8591	0.246
47.8834	1.113	47.8834	0.35526	47.8834	0.44	47.8834	0.613	47.8834	0.078	47.8834	0.884	47.8834	0.575	47.8834	0.208
47.9077	1.144	47.9077	0.22978	47.9077	0.56	47.9077	0.528	47.9077	0.368	47.9077	0.639	47.9077	0.832	47.9077	0.129
47.9321	1.041	47.9321	0.32128	47.9321	0.525	47.9321	0.577	47.9321	0.204	47.9321	0.837	47.9321	0.471	47.9321	-0.218
47.9564	1.186	47.9564	0.25779	47.9564	0.532	47.9564	0.749	47.9564	0.195	47.9564	0.737	47.9564	0.399	47.9564	-0.039
47.9807	1.165	47.9807	0.3283	47.9807	0.621	47.9807	0.273	47.9807	0.31	47.9807	0.306	47.9807	0.543	47.9807	0.151
48.005	1.227	48.005	0.01782	48.005	0.432	48.005	0.559	48.005	0.271	48.005	0.278	48.005	0.574	48.005	0
48.0294	1.196	48.0294	0.05732	48.0294	0.285	48.0294	0.732	48.0294	0.84	48.0294	0.084	48.0294	0.44	48.0294	0.282
48.0537	1.196	48.0537	0.10683	48.0537	0.498	48.0537	0.524	48.0537	0.821	48.0537	0.066	48.0537	0.306	48.0537	0.049
48.078	1.155	48.078	0.26035	48.078	0.516	48.078	0.728	48.078	0.72	48.078	0.028	48.078	0.173	48.078	0.177
48.1023	1.278	48.1023	0.17686	48.1023	0.306	48.1023	1.148	48.1023	0.568	48.1023	0.237	48.1023	0.029	48.1023	0.006
48.1267	1.268	48.1267	-0.08264	48.1267	0.489	48.1267	1.538	48.1267	0.343	48.1267	0.116	48.1267	-0.115	48.1267	0.041
48.151	1	48.151	0.26587	48.151	0.62	48.151	1.412	48.151	0.387	48.151	-0.098	48.151	0.287	48.151	0.169
48.1753	1.34	48.1753	0.25439	48.1753	0.525	48.1753	1.648	48.1753	0.513	48.1753	0.101	48.1753	-0.207	48.1753	0.184
48.1996	1.175	48.1996	0.2119	48.1996	0.543	48.1996	1.584	48.1996	0.423	48.1996	-0.009	48.1996	0.351	48.1996	0.198
48.2239	1.134	48.2239	0.00441	48.2239	0.519	48.2239	1.273	48.2239	0.127	48.2239	-0.068	48.2239	0.125	48.2239	-0.045
48.2483	1.052	48.2483	-0.03909	48.2483	0.455	48.2483	1.137	48.2483	0.254	48.2483	-0.106	48.2483	0.26	48.2483	-0.174
48.2726	1.278	48.2726	0.27943	48.2726	0.349	48.2726	1.187	48.2726	0.123	48.2726	-0.062	48.2726	-0.007	48.2726	0.099
48.2969	1.093	48.2969	0.13394	48.2969	0.419	48.2969	1.217	48.2969	0.198	48.2969	0.003	48.2969	0.169	48.2969	-0.144
48.3212	1	48.3212	0.21445	48.3212	0.293	48.3212	0.782	48.3212	0.026	48.3212	0.068	48.3212	0.016	48.3212	-0.094
48.3456	1.351	48.3456	0.27496	48.3456	0.126	48.3456	0.626	48.3456	0.153	48.3456	-0.032	48.3456	-0.004	48.3456	0.017
48.3699	1.186	48.3699	0.40747	48.3699	0.299	48.3699	0.553	48.3699	-0.163	48.3699	-0.152	48.3699	-0.023	48.3699	0.129
48.3942	1.155	48.3942	0.40598	48.3942	0.4	48.3942	0.449	48.3942	0.006	48.3942	0.026	48.3942	-0.063	48.3942	0.045
48.4185	0.969	48.4185	0.64149	48.4185	0.234	48.4185	0.396	48.4185	-0.001	48.4185	-0.187	48.4185	0.001	48.4185	0.167
48.4429	0.979	48.4429	0.382	48.4429	0.191	48.4429	0.24	48.4429	-0.09	48.4429	-0.138	48.4429	0.064	48.4429	0.063
48.4672	1.278	48.4672	0.51451	48.4672	0.127	48.4672	0.322	48.4672	-0.016	48.4672	0.055	48.4672	0.066	48.4672	0.01
48.4915	1.268	48.4915	0.54402	48.4915	-0.071	48.4915	0.29	48.4915	-0.067	48.4915	0.001	48.4915	-0.139	48.4915	0.225
48.5158	1.165	48.5158	0.49153	48.5158	-0.072	48.5158	0.072	48.5158	-0.024	48.5158	0.009	48.5158	0.059	48.5158	0.018
48.5401	1.216	48.5401	0.32504	48.5401	0.122	48.5401	0.123	48.5401	0.04	48.5401	0.016	48.5401	0.061	48.5401	0.058
48.5645	1.33	48.5645	0.41655	48.5645	-0.209	48.5645	0.246	48.5645	-0.103	48.5645	-0.151	48.5645	0.105	48.5645	-0.149
48.5888	1.247	48.5888	0.29106	48.5888	0.233	48.5888	0.317	48.5888	-0.008	48.5888	0.053	48.5888	0.055	48.5888	-0.05
48.6131	1.237	48.6131	0.24857	48.6131	0.026	48.6131	0.245	48.6131	0.097	48.6131	0.05	48.6131	0.13	48.6131	0.205
48.6374	1.289	48.6374	0.02008	48.6374	-0.058	48.6374	0.285	48.6374	-0.087	48.6374	0.007	48.6374	-0.095	48.6374	0.109
48.6618	1.144	48.6618	0.29659	48.6618	0.126	48.6618	0.202	48.6618	-0.033	48.6618	0.076	48.6618	-0.041	48.6618	0.364
48.6861	1.206	48.6861	0.0681	48.6861	-0.029	48.6861	0.192	48.6861	0.093	48.6861	0.084	48.6861	0.127	48.6861	-0.134
48.7104	1.227	48.7104	0.22161	48.7104	0.001	48.7104	0.16	48.7104	0.023	48.7104	0.154	48.7104	-0.056	48.7104	0.316
48.7347	1.278	48.7347	0.00412	48.7347	-0.175	48.7347	0.067	48.7347	-0.118	48.7347	-0.013	48.7347	-0.023	48.7347	0.355
48.7591	1.206	48.7591	0.17763	48.7591	0.004	48.7591	0.273	48.7591	-0.017	48.7591	-0.211	48.7591	-0.092	48.7591	0.414
48.7834	1.093	48.7834	0.17614	48.7834	-0.043	48.7834	0.067	48.7834	0.043	48.7834	-0.038	48.7834	-0.027	48.7834	0.38
48.8077	1.299	48.8077	0.19465	48.8077	0.167	48.8077	0.098	48.8077	-0.082	48.8077	-0.009	48.8077	0.336	48.8077	0.223
48.832	1.175	48.832	0.14216	48.832	-0.231	48.832	-0.181	48.832	-0.042	48.832	-0.186	48.832	0.175	48.832	0.344
48.8564	1.103	48.8564	0.00667	48.8564	0.103	48.8564	0.077	48.8564	0.102	48.8564	0.07	48.8564	-0.101	48.8564	0.269
48.8807	1.062	48.8807	0.43818	48.8807	-0.047	48.8807	-0.149	48.8807	0.028	48.8807	-0.056	48.8807	0.047	48.8807	0.328
48.905	1.052	48.905	0.28169	48.905	-0.084	48.905	-0.069	48.905	0.316	48.905	0.18	48.905	-0.053	48.905	0.305
48.9293	1.247	48.9293	-0.1218	48.9293	0.137	48.9293	0.218	48.9293	-0.014	48.9293	-0.069	48.9293	0.033	48.9293	0.158
48.9536	0.99	48.9536	0.14472	48.9536	0.152	48.9536	0.113	48.9536	0.201	48.9536	-0.04	48.9536	-0.067	48.9536	0.599
48.978	1.206	48.978	0.20522	48.978	-0.019	48.978	0.039	48.978	0.087	48.978	-0.021	48.978	0.04	48.978	0.308
49.0023	0.969	49.0023	-0.03327	49.0023	-0.21	49.0023	-0.21	49.0023	0.077	49.0023	0.029	49.0023	0.044	49.0023	0.574
49.0266	1.062	49.0266	-0.00375	49.0266	0.269	49.0266	0.273	49.0266	0.386	49.0266	0.141	49.0266	0.078	49.0266	0.397
49.0509	1.021	49.0509	-0.00524	49.0509	0.006	49.0509	0.055	49.0509	0.344	49.0509	0.232	49.0509	0.02	49.0509	0.652
49.0753	1.124	49.0753	-0.01674	49.0753	0.011	49.0753	0.002	49.0753	0.262	49.0753	0.303	49.0753	0.117	49.0753	0.97
49.0996	0.918	49.0996	0.14677	49.0996	0.202	49.0996	0.063	49.0996	-0.037	49.0996	0.25	49.0996	0.08	49.0996	1.051
49.1239	1.155	49.1239	0.26829	49.1239	0.31	49.1239	0.299	49.1239	0.128	49.1239	0.228	49.1239	0.084	49.1239	0.904
49.1482	1.072	49.1482	0.2468	49.1482	0.037	49.1482	0.132	49.1482	0.035	49.1482	0.093	49.1482	-0.087	49.1482	0.593
49.1726	1.01	49.1726	0.0183	49.1726	0.074	49.1726	0.214	49.1726	0.2	49.1726	-0.001	49.1726	-0.062	49.1726	0.396
49.1969	0.938	49.1969	-0.00419	49.1969	0.182	49.1969	0.316	49.1969	0.036	49.1969	0.121	49.1969	0.014	49.1969	0.476
49.2212	0.918	49.2212	0.06633	49.2212	0.208	49.2212	0.397	49.2212	0.14	49.2212	-0.065	49.2212	0.153	49.2212	0.547
49.2455	0.887	49.2455	-0.06916	49.2455	0.358	49.2455	0.551	49.2455	-0.107	49.2455	0.047	49.2455	0.322	49.2455	0.566
49.2698	0.907	49.2698	0.36235	49.2698	0.529	49.2698	0.674	49.2698	0.193	49.2698	0.159	49.2698	0.286	49.2698	0.389
49.2942	0.907	49.2942	0.01086	49.2942	0.72	49.2942	1.096	49.2942	-0.208	49.2942	0.158	49.2942	0.414	49.2942	0.8
49.3185	1.227	49.3185	0.22537	49.3185	1.304	49.3185	1.167	49.3185	0.019	49.3185	-0.224	49.3185	0.285	49.3185	1.097
49.3428	1.124	49.3428	0.08988	49.3428	2.227	49.3428	1.342	49.3428	0.082	49.3428	-0.008	49.3428	0.506	49.3428	1.158
49.3671	1.021	49.3671	0.20239	49.3671	2.697	49.3671	0.97	49.3671	0.115	49.3671	-0.091	49.3671	0.522	49.3671	1.074
49.3915	1.206	49.3915	0.4789	49.3915	2.755	49.3915	1.114	49.3915	-0.018	49.3915	-0.02	49.3915	0.218	49.3915	1.104
49.4158	1.196	49.4158	0.46741	49.4158	2.163	49.4158	0.577	49.4158	-0.089	49.4158	0.247	49.4158	-0.035	49.4158	0.824
49.4401	1.196	49.4401	0.37292	49.4401	2.025	49.4401	1.051	49.4401	-0.022	49.4401	0.463	49.4401	0.156	49.4401	0.71
49.4644	1.299	49.4644	0.29943	49.4644	1.732	49.4644	0.865	49.4644	-0.048	49.4644	0.391	49.4644	0.264	49.4644	0.606
49.4888	1.124	49.4888	0.34894	49.4888	1.698	49.4888	0.566	49.4888	0.05	49.4888	0.4	49.4888	0.043	49.4888	0.409
49.5131	1.247	49.5131	0.50245	49.5131	1.416	49.5131	0.535	49.5131	0.107	49.5131	0.029	49.5131	0.059	49.5131	0.573
49.5374	1.237	49.5374	0.34596	49.5374	1.257	49.5374	0.38	49.5374	0.009	49.5374	0.451	49.5374	-0.059	49.5374	0.727
49.5617	1.258	49.5617	0.12847	49.5617	0.841	49.5617	0.174	49.5617	-0.026	49.5617	0.162	49.5617	0.111	49.5617	0.2
49.586	1.423	49.586	0.21998	49.586	0.828	49.586	0.019	49.586	-0.031	49.586	0.286	49.586	-0.058	49.586	0.251
49.6104	1.32	49.6104	0.18749	49.6104	0.536	49.6104	-0.063	49.6104	0.006	49.6104	0.058	49.6104	-0.001	49.6104	0.219
49.6347	1.165	49.6347	0	49.6347	0.491	49.6347	-0.073	49.6347	-0.081	49.6347	0.151	49.6347	0.16	49.6347	0.27
49.659	1.206	49.659	0.11251	49.659	0.045	49.659	-0.104	49.659	0.09	49.659	-0.004	49.659	0.331	49.659	0.022
49.6833	1.237	49.6833	0.04902	49.6833	-0.082	49.6833	0.066	49.6833	0.168	49.6833	-0.066	49.6833	0.419	49.6833	0.28
49.7077	1.206	49.7077	-0.06647	49.7077	0.183	49.7077	0.185	49.7077	-0.032	49.7077	-0.035	49.7077	0.302	49.7077	-0.061
49.732	1.577	49.732	-0.23296	49.732	-0.016	49.732	0.057	49.732	0.088	49.732	0.079	49.732	0.257	49.732	0.052
49.7563	1.34	49.7563	-0.21345	49.7563	-0.019	49.7563	-0.133	49.7563	0.115	49.7563	-0.066	49.7563	0.057	49.7563	-0.103
49.7806	1.278	49.7806	0.12506	49.7806	-0.073	49.7806	0.12	49.7806	-0.002	49.7806	-0.199	49.7806	0.28	49.7806	0.021
49.805	1.258	49.805	-0.04143	49.805	-0.117	49.805	0.178	49.805	0.046	49.805	-0.048	49.805	0.338	49.805	0.196
49.8293	1.371	49.8293	0.11208	49.8293	0.011	49.8293	-0.022	49.8293	0.011	49.8293	0.104	49.8293	0.479	49.8293	0.412
49.8536	1.196	49.8536	-0.25041	49.8536	-0.262	49.8536	-0.099	49.8536	0.028	49.8536	-0.034	49.8536	0.444	49.8536	0.093
49.8779	1.237	49.8779	-0.0049	49.8779	0.072	49.8779	-0.155	49.8779	-0.006	49.8779	-0.068	49.8779	0.029	49.8779	-0.083
49.9022	1.268	49.9022	0.10762	49.9022	-0.149	49.9022	0.076	49.9022	0.115	49.9022	-0.132	49.9022	0.252	49.9022	-0.113
49.9266	1.289	49.9266	0.33312	49.9266	-0.079	49.9266	-0.137	49.9266	0.163	49.9266	-0.156	49.9266	0.187	49.9266	-0.155
49.9509	1.351	49.9509	0.14563	49.9509	0.054	49.9509	0.104	49.9509	-0.046	49.9509	-0.103	49.9509	0.029	49.9509	0.137
49.9752	1.433	49.9752	-0.04186	49.9752	0.032	49.9752	-0.17	49.9752	0.168	49.9752	-0.164	49.9752	-0.108	49.9752	0.017
49.9995	1.34	49.9995	0.00866	49.9995	0	49.9995	0	49.9995	0	49.9995	0	49.9995	0	49.9995	0
