# Supplementary material for: Non–linear bonding trends in maleonitrile-1,2–dithiolate complexes of the transuranium actinides (An3+ = Np3+ – Cf3+ excl. Bk3+)
Source: Research Square preprint supplement (doi:10.21203/rs.3.rs-6100125/v1), 2025-03-05
Supplement: Supplementary file 10 [file raman.xlsx]

## Sheet: Sheet1
cm^-1	La	cm^-1	Ce	cm^-1	Pr	cm^-1	Nd	cm^-1	Sm	cm^-1	Eu	cm^-1	Gd	cm^-1	Dy
51	0	51.7735	710.91	51	0	51.7735	1710.11	51	0	51	0	401.718	43.2663	51	0
52.5	8745.92	53.0635	2093.82	52.5	7118.74	53.0635	1993.73	52.5	3890.35	52.5	1137.73	402.95	49.6541	52.5	8712.62
54	12855.2	54.3548	2759.32	54	9839.71	54.3548	2305.34	54	5623.86	54	1842.79	404.183	52.7088	54	13328.2
55.5	14230.7	55.6458	2918.25	55.5	9740.18	55.6458	2567.39	55.5	5890.16	55.5	2278.02	405.416	52.0054	55.5	15821.9
57	14818.6	56.9367	2742.45	57	8004.15	56.9367	2725.79	57	5185.63	57	2437.93	406.647	47.6366	57	17529.3
58.5	15914	58.2274	2715.8	58.5	5699.38	58.2274	2771.51	58.5	4031.46	58.5	2348.75	407.88	40.1793	58.5	19097.8
60	17330.4	59.5163	2661.54	60	3671.29	59.5163	2736.2	60	2985.18	60	2181.73	409.112	30.5732	60	20929.4
61.5	18672.5	60.8065	2651.16	61.5	2497.93	60.8065	2667.23	61.5	2333.73	61.5	2080.34	410.344	19.9426	61.5	23184.8
63	19435.2	62.0966	2648.92	63	2145.34	62.0966	2599.86	63	1673.17	63	1970.89	411.575	9.40597	63	25892.1
64.5	19264.2	63.3864	2609.97	64.5	2585.62	63.3864	2543.57	64.5	848.063	64.5	1788.08	412.806	-0.087145	64.5	28931.7
66	18103.7	64.676	2508.44	66	3943.05	64.676	2487.6	66	532.069	66	1635.14	414.038	-7.85984	66	32092.7
67.5	16097.2	65.9639	2377.72	67.5	6172.1	65.9639	2417.54	67.5	1145.71	67.5	1590.3	415.268	-13.5419	67.5	35057.7
69	14156.1	67.253	2360.74	69	8888.46	67.253	2328.85	69	2179.83	69	1562.05	416.499	-17.0418	69	37525.9
70.5	13020.4	68.542	2168.91	70.5	11777.2	68.542	2228.46	70.5	3238.53	70.5	1482.87	417.728	-18.478	70.5	39238.8
72	11911.8	69.8308	2148.64	72	14584.7	69.8308	2126.21	72	4530.26	72	1437.09	418.959	-18.0987	72	40203.1
73.5	10055.8	71.1178	2059.63	73.5	17002.8	71.1178	2025.21	73.5	6133.84	73.5	1486.49	420.19	-16.2145	73.5	40845.1
75	8383.04	72.4061	1943.64	75	18888.1	72.4061	1919.39	75	7580.74	75	1538.95	421.419	-13.1568	75	41512.7
76.5	7929.31	73.6943	1802.35	76.5	20230.5	73.6943	1799.62	76.5	8498.95	76.5	1517.76	422.649	-9.26534	76.5	42352.3
78	7936.21	74.9807	1673.04	78	20922.7	74.9807	1662.48	78	8970.97	78	1491.15	423.879	-4.89187	78	43365.3
79.5	7305.71	76.2684	1510.89	79.5	20767.5	76.2684	1514.61	79.5	9069.18	79.5	1517.29	425.107	-0.404753	79.5	44311.5
81	6171.33	77.5559	1355.88	81	19818	77.5559	1369.65	81	8794.7	81	1525.91	426.337	3.82014	81	45036.8
82.5	5069.85	78.8416	1220.12	82.5	18287.2	78.8416	1240.79	82.5	8204	82.5	1445.33	427.565	7.42979	82.5	45620.7
84	4215.99	80.1287	1099.11	84	16390.9	80.1287	1134.69	84	7334.75	84	1328.96	428.794	10.1412	84	46054.8
85.5	3715.55	81.4156	1036.94	85.5	14281.6	81.4156	1050.33	85.5	6202.57	85.5	1251.02	430.021	11.7928	85.5	46056.3
87	3953.93	82.7007	985.019	87	12026.8	82.7007	982.334	87	4950.95	87	1149.92	431.25	12.381	87	45384.3
88.5	5274.45	83.9871	891.554	88.5	9673.18	83.9871	925.033	88.5	3743.82	88.5	916.754	432.477	12.0666	88.5	43996.9
90	7294.54	85.2734	885.948	90	7356.81	85.2734	874.404	90	2655.27	90	613.002	433.706	11.1437	90	41899.6
91.5	9536.27	86.5579	837.872	91.5	5290.56	86.5579	827.448	91.5	1771.77	91.5	400.524	434.934	9.97426	91.5	39144.5
93	11993.1	87.8437	790.114	93	3564.45	87.8437	780.987	93	1101.07	93	328.697	436.16	8.90647	93	35837.2
94.5	14640.9	89.1293	728.632	94.5	2126.85	89.1293	731.7	94.5	550.742	94.5	342.303	437.388	8.19812	94.5	32218.6
96	17026.7	90.4132	674.972	96	974.402	90.4132	677.483	96	142.289	96	333.064	438.614	7.96984	96	28492.3
97.5	18693.8	91.6983	611.629	97.5	216.396	91.6983	618.701	97.5	0	97.5	207.982	439.842	8.20215	97.5	24662.9
99	19612.7	92.9833	574.284	99	0	92.9833	557.954	99	0	99	43.977	441.067	8.77862	99	20764
100.5	19858.1	94.2666	508.321	100.5	0	94.2666	498.401	100.5	0	100.5	0	442.294	9.5612	100.5	17067.1
102	19203	95.5511	422.535	102	182.787	95.5511	442.024	102	0	102	26.7903	443.52	10.4731	102	13804
103.5	17360.8	96.8339	377.991	103.5	986.652	96.8339	389.175	103.5	386.893	103.5	22.4458	444.746	11.5585	103.5	10865.1
105	15011.7	98.1181	335.908	105	2120.68	98.1181	339.572	105	1086.41	105	0	445.971	12.9962	105	8147.99
106.5	13278.3	99.4005	303.846	106.5	3244.41	99.4005	293.745	106.5	1888.81	106.5	33.344	447.196	15.0534	106.5	5904.55
108	12144.9	100.684	233.235	108	4382.14	100.684	253.658	108	2669.02	108	178.84	448.422	17.9896	108	4400.38
109.5	10984.6	101.968	228.352	109.5	5723.79	101.968	222.109	109.5	3342.59	109.5	331.775	449.647	21.9339	109.5	3579.79
111	9697.59	103.249	184.699	111	7135.99	103.249	201.48	111	3840.34	111	444.132	450.872	26.7739	111	3267.2
112.5	8432.85	104.533	172.956	112.5	8249.18	104.533	192.744	112.5	4072.97	112.5	502.865	452.096	32.0932	112.5	3133.22
114	7244.19	105.814	179.594	114	8704.23	105.814	195.214	114	4046.95	114	500.414	453.322	37.187	114	2900.18
115.5	6277.99	107.097	205.124	115.5	8312.2	107.097	206.838	115.5	3923.7	115.5	476.126	454.545	41.163	115.5	2764.53
117	5567.56	108.378	224.751	117	7437.25	108.378	224.653	117	3757.31	117	466.933	455.769	43.1109	117	2948.96
118.5	4830.45	109.66	243.555	118.5	6595.35	109.66	245.2	118.5	3383.82	118.5	440.567	456.993	42.3031	118.5	3050.85
120	3850.88	110.94	290.886	120	5687.96	110.94	265.063	120	2713.44	120	367.744	458.216	38.3743	120	2614.58
121.5	2745.5	112.222	277.25	121.5	4404.79	112.222	281.605	121.5	1887.06	121.5	298.103	459.441	31.432	121.5	2039.44
123	1788.87	113.502	273.161	123	2963.6	113.502	293.692	123	1201.74	123	278.708	460.663	22.0632	123	1859.26
124.5	1093.67	114.784	313.955	124.5	1772.73	114.784	301.921	124.5	878.108	124.5	276.452	461.886	11.2306	124.5	1655.75
126	529.828	116.063	325.409	126	880.74	116.063	308.091	126	699.157	126	222.268	463.109	0.0813247	126	848.901
127.5	80.0137	117.344	308.766	127.5	256.156	117.344	314.124	127.5	316.939	127.5	93.7844	464.331	-10.2826	127.5	11.1904
129	0	118.624	321.377	129	0	118.624	321.068	129	0	129	0	465.553	-19.0122	129	0
130.5	198.477	119.904	304.568	130.5	0	119.904	328.693	130.5	0	130.5	0	466.776	-25.6424	130.5	49.2315
132	699.451	121.183	356.322	132	0	121.183	335.81	132	162.871	132	137.027	467.998	-30.112	132	221.879
133.5	1235.06	122.462	334.636	133.5	0	122.462	340.989	133.5	334.784	133.5	175.775	469.219	-32.6737	133.5	517.829
135	1882.49	123.742	354.537	135	0	123.742	343.267	135	406.532	135	80.0759	470.442	-33.7288	135	1148.74
136.5	2985.67	125.02	360.544	136.5	327.402	125.02	342.66	136.5	605.68	136.5	68.5894	471.663	-33.6454	136.5	2269.62
138	4545.04	126.299	321.58	138	936.535	126.299	340.441	138	1030.63	138	229.683	472.883	-32.6249	138	3947.65
139.5	6033.22	127.577	336.601	139.5	1547.06	127.577	339.219	139.5	1519.04	139.5	408.271	474.105	-30.6675	139.5	5788.41
141	7104.32	128.856	332.787	141	1923.86	128.856	342.632	141	1912.9	141	481.594	475.326	-27.651	141	7258.38
142.5	7944.5	130.134	353.668	142.5	2125.79	130.134	354.519	142.5	2273.95	142.5	486.964	476.546	-23.4965	142.5	8398.25
144	8858.46	131.411	352.673	144	2378.08	131.411	377.687	144	2677.39	144	514.91	477.767	-18.355	144	9470.58
145.5	9945.38	132.689	406.833	145.5	2839.32	132.689	412.769	145.5	3026.97	145.5	625.55	478.987	-12.7318	145.5	10337.2
147	11087.3	133.966	444.128	147	3377.88	133.966	457.779	147	3297.05	147	795.627	480.206	-7.47197	147	10697.3
148.5	12103.1	135.243	518.703	148.5	3684.91	135.243	508.637	148.5	3627.58	148.5	934.36	481.426	-3.56997	148.5	10557.1
150	12836.3	136.521	563.153	150	3792.06	136.521	560.375	150	4044.73	150	1008.38	482.646	-1.82075	150	10076.5
151.5	13182.2	137.797	602.862	151.5	4094.04	137.797	608.338	151.5	4461.67	151.5	1076.31	483.865	-2.39461	151.5	9418.35
153	13224.3	139.073	671.28	153	4745.8	139.073	648.785	153	4842.66	153	1177.42	485.084	-4.46224	153	8730.39
154.5	13108.6	140.35	698.565	154.5	5541.59	140.35	678.813	154.5	5135.82	154.5	1276.31	486.302	-6.0107	154.5	8017.19
156	12723.4	141.625	697.548	156	6274.92	141.625	696.051	156	5285.74	156	1339.92	487.521	-3.96279	156	7213.99
157.5	11821.7	142.901	715.106	157.5	6857.49	142.901	698.672	157.5	5319.12	157.5	1388.64	488.74	5.35733	157.5	6315.55
159	10469.3	144.177	691.665	159	7269.49	144.177	686.034	159	5279.73	159	1430.11	489.958	25.4625	159	5356.76
160.5	8977.27	145.452	688.207	160.5	7490.13	145.452	659.669	160.5	5161.34	160.5	1414.75	491.176	58.7907	160.5	4454.47
162	7470.71	146.727	639.04	162	7495.27	146.727	624.052	162	4929.09	162	1318.57	492.394	105.858	162	3743.9
163.5	5949.42	148.003	555.319	163.5	7325.68	148.003	586.573	163.5	4579.72	163.5	1193.7	493.611	164.705	163.5	3108.92
165	4496.19	149.277	546.705	165	7052.33	149.277	556.43	165	4151.11	165	1088.65	494.83	230.838	165	2324.18
166.5	3182.13	150.551	519.232	166.5	6691.33	150.551	542.577	166.5	3656.95	166.5	1001.81	496.047	297.737	166.5	1490.62
168	2040.39	151.827	528.65	168	6191.82	151.827	551.296	168	3099.73	168	913.296	497.264	357.908	168	872.083
169.5	1146.43	153.1	555.591	169.5	5491.75	153.1	584.154	169.5	2523.36	169.5	807.903	498.48	404.283	169.5	514.624
171	544.643	154.374	606.268	171	4691.63	154.374	637.143	171	1962.32	171	685.127	499.697	431.688	171	334.873
172.5	224.1	155.647	722.068	172.5	4062.59	155.647	701.527	172.5	1430.99	172.5	561.638	500.913	438.048	172.5	229.73
174	133.014	156.921	777.455	174	3642.34	156.921	766.27	174	1005.83	174	456.348	502.129	425.035	174	99.8389
175.5	86.0957	158.194	831.396	175.5	3124.16	158.194	821.229	175.5	774.583	175.5	364.601	503.346	397.983	175.5	0
177	0	159.467	901.056	177	2364.94	159.467	859.862	177	641.78	177	264.592	504.562	365.032	177	0
178.5	28.4531	160.739	901.261	178.5	1592.02	160.739	880.332	178.5	436.289	178.5	171.73	505.777	335.67	178.5	0
180	392.154	162.012	860.351	180	1065.63	162.012	884.658	180	196.519	180	114.536	506.993	318.945	180	0
181.5	763.85	163.285	891.002	181.5	869.207	163.285	876.531	181.5	49.2578	181.5	60.6418	508.208	321.723	181.5	0
183	913	164.557	883.647	183	809.059	164.557	859.01	183	0	183	0	509.423	347.36	183	0
184.5	943.516	165.828	840.695	184.5	523.646	165.828	833.243	184.5	0	184.5	26.4802	510.637	395.042	184.5	0
186	990.58	167.1	796.91	186	89.5	167.1	798.65	186	4.41016	186	155.279	511.852	459.933	186	0
187.5	1061.28	168.371	752.248	187.5	0	168.371	754.177	187.5	54.7568	187.5	216.892	513.066	534.07	187.5	0
189	1023.05	169.643	724.743	189	175.172	169.643	699.74	189	70.2744	189	128.191	514.28	607.794	189	0
190.5	758.141	170.914	657.082	190.5	305.203	170.914	637.081	190.5	21.7666	190.5	21.171	515.494	671.417	190.5	0
192	411.916	172.185	554.85	192	250	172.185	569.723	192	0	192	0	516.708	716.788	192	42.1768
193.5	245.373	173.455	498.463	193.5	95.1016	173.455	502.225	193.5	0	193.5	0	517.921	738.463	193.5	113.583
195	228.879	174.725	422.495	195	0	174.725	439.163	195	11.4521	195	12.5786	519.135	734.309	195	153.701
196.5	130.455	175.995	378.248	196.5	0	175.995	384.223	196.5	36.1611	196.5	32.6367	520.348	705.499	196.5	284.846
198	0	177.265	336.281	198	168.742	177.265	339.58	198	38.2627	198	52.6256	521.561	655.971	198	687.775
199.5	0	178.534	283.737	199.5	168.373	178.534	305.662	199.5	22.1914	199.5	46.035	522.774	591.544	199.5	1126.78
201	0	179.805	287.646	201	0	179.805	281.263	201	0	201	12.3695	523.986	518.888	201	1188.97
202.5	0	181.074	241.952	202.5	0	181.074	264.008	202.5	0	202.5	0	525.199	444.57	202.5	957.471
204	0	182.343	266.829	204	415.084	182.343	251.04	204	0	204	2.63416	526.411	374.294	204	751.772
205.5	0	183.612	240.136	205.5	747.188	183.612	239.738	205.5	46.1592	205.5	3.91687	527.623	312.429	205.5	571.775
207	0	184.88	216.426	207	867.908	184.88	228.212	207	204.446	207	0	528.835	261.798	207	276.708
208.5	0	186.149	221.163	208.5	1064.1	186.149	215.43	208.5	396.912	208.5	14.4943	530.046	223.689	208.5	2.15234
210	164.139	187.417	217.733	210	1432.93	187.417	201.019	210	553.098	210	75.4974	531.258	198.003	210	0
211.5	866.922	188.685	179.744	211.5	1935.45	188.685	184.918	211.5	689.402	211.5	163.471	532.469	183.479	211.5	9.5459
213	2177.33	189.952	161.589	213	2547.64	189.952	167.117	213	903.171	213	266.937	533.68	177.952	213	215.308
214.5	3693.6	191.22	145.879	214.5	3125.4	191.22	147.598	214.5	1236.98	214.5	332.223	534.891	178.631	214.5	622.354
216	5207.75	192.487	130.294	216	3506.59	192.487	126.439	216	1593.08	216	338.781	536.101	182.396	216	1272.19
217.5	6968.42	193.754	110.288	217.5	3696.4	193.754	103.911	217.5	1897.42	217.5	384.99	537.312	186.125	217.5	2111.65
219	9160.16	195.021	97.9929	219	3800.98	195.021	80.4716	219	2175.55	219	509.388	538.522	187.034	219	3024.14
220.5	11591.4	196.287	29.5315	220.5	3812.72	196.287	56.6615	220.5	2368.05	220.5	580.708	539.732	183	220.5	3753.34
222	13848.5	197.554	38.5261	222	3710.23	197.554	33.0267	222	2351.27	222	528.166	540.941	172.816	222	4035.27
223.5	15711.1	198.82	-0.0753142	223.5	3712.76	198.82	10.2025	223.5	2174.22	223.5	472.857	542.15	156.326	223.5	4019.48
225	17377.8	200.086	3.89328	225	3887.37	200.086	-10.8665	225	1987.28	225	494.616	543.36	134.4	225	3994.04
226.5	19008.4	201.352	-28.6981	226.5	3900.45	201.352	-28.7441	226.5	1780.21	226.5	496.411	544.569	108.736	226.5	3937.83
228	20642.8	202.618	-55.2995	228	3722.75	202.618	-41.6077	228	1543.46	228	425.977	545.778	81.5347	228	3711.27
229.5	22459.8	203.883	-63.4869	229.5	3757.32	203.883	-47.7325	229.5	1421.04	229.5	371.526	546.987	55.0869	229.5	3265.16
231	24318.5	205.148	-56.5344	231	4054.25	205.148	-46.1675	231	1389.93	231	368.498	548.196	31.3859	231	2615.16
232.5	25880.3	206.413	-39.4318	232.5	4398.13	206.413	-37.1837	232.5	1315.25	232.5	385.015	549.403	11.8245	232.5	1957.48
234	27455.9	207.678	-22.0492	234	4844.74	207.678	-22.1091	234	1285.29	234	432.059	550.611	-2.95444	234	1507.73
235.5	29579.4	208.943	8.48341	235.5	5489.63	208.943	-2.49131	235.5	1412.17	235.5	507.714	551.82	-13.039	235.5	1177.9
237	32023.4	210.207	0	237	6261.08	210.207	21.0179	237	1687.04	237	576.376	553.028	-19.0844	237	803.91
238.5	34261.3	211.471	36.3035	238.5	7146.84	211.471	49.363	238.5	2163.22	238.5	641.726	554.235	-22.0625	238.5	417.431
240	35942.9	212.735	95.607	240	8174.43	212.735	84.7896	240	2819.62	240	755.634	555.442	-22.9965	240	118.347
241.5	36745.3	213.999	119.911	241.5	9304.22	213.999	129.451	241.5	3501.63	241.5	969.285	556.649	-22.7506	241.5	0
243	36849.6	215.262	161.218	243	10588.2	215.262	183.456	243	4155.96	243	1241.25	557.856	-21.9164	243	89.707
244.5	36709.4	216.524	227.081	244.5	12112.9	216.524	243.322	244.5	4797.99	244.5	1450.16	559.063	-20.8072	244.5	348.294
246	36082.9	217.787	322.958	246	13655	217.787	301.783	246	5438.95	246	1561.2	560.268	-19.536	246	731.797
247.5	34444.2	219.05	380.396	247.5	14881.6	219.05	349.394	247.5	6131.84	247.5	1641.65	561.475	-18.133	247.5	1547.66
249	32035.8	220.313	400.844	249	15692.3	220.313	377.559	249	6833.04	249	1762.5	562.682	-16.6531	249	3036.59
250.5	29424	221.576	414.432	250.5	16056.2	221.576	381.848	250.5	7383.6	250.5	1959.21	563.888	-15.2317	250.5	4697.51
252	26859	222.838	384.154	252	15953.8	222.838	364.136	252	7693.7	252	2145.37	565.092	-14.0761	252	5972.12
253.5	24528.6	224.1	320.586	253.5	15457.8	224.1	332.405	253.5	7787.5	253.5	2182.79	566.298	-13.3988	253.5	6901.85
255	22672.4	225.362	288.028	255	14713.8	225.362	298.068	255	7734.38	255	2115.66	567.504	-13.3239	255	7659.98
256.5	21408.3	226.622	266.169	256.5	13817.8	226.622	271.975	256.5	7565.94	256.5	2087.43	568.71	-13.8057	256.5	8339.59
258	20371.1	227.884	223.462	258	12679.1	227.884	261.123	258	7265.41	258	2085.68	569.913	-14.591	258	9010.57
259.5	19033.6	229.145	265.898	259.5	11154.6	229.145	267.924	259.5	6793.05	259.5	1997.98	571.118	-15.2451	259.5	9728.05
261	17499.9	230.406	256.615	261	9439.19	230.406	292.414	261	6149.41	261	1827.78	572.323	-15.2352	261	10482.9
262.5	16233.3	231.667	339.471	262.5	7929.57	231.667	335.847	262.5	5427.68	262.5	1678.56	573.527	-14.0528	262.5	11065.4
264	15279.8	232.926	385.466	264	6702.54	232.926	402.816	264	4689.8	264	1570.11	574.731	-11.3381	264	11304.3
265.5	14299.3	234.187	453.613	265.5	5568.71	234.187	499.611	265.5	3874.34	265.5	1423.54	575.936	-6.97725	265.5	11267.7
267	12963.6	235.447	595.894	267	4463.62	235.447	628.915	267	3050.42	267	1220.87	577.138	-1.14563	267	11040.7
268.5	11231.7	236.707	745.894	268.5	3511.05	236.707	783.77	268.5	2438.48	268.5	1032.96	578.342	5.70801	268.5	10633.1
270	9396.85	237.965	940.884	270	2725.39	237.965	945.176	270	2031.18	270	896.154	579.546	12.9306	270	10045.7
271.5	7680	239.225	1149.87	271.5	1994.99	239.225	1086.19	271.5	1665.04	271.5	786.566	580.748	19.7658	271.5	9289.43
273	6074.45	240.485	1275.17	273	1310.48	240.485	1181.69	273	1275.26	273	661.445	581.952	25.4647	273	8376.37
274.5	4541.68	241.744	1323.3	274.5	708.148	241.744	1219.13	274.5	850.306	274.5	485.573	583.153	29.383	274.5	7316.59
276	3190.35	243.001	1241.27	276	233.939	243.001	1204.29	276	436.147	276	303.338	584.356	31.0537	276	6186.22
277.5	2221.33	244.26	1124.13	277.5	0	244.26	1158.36	277.5	140.637	277.5	206.546	585.559	30.2299	277.5	5203.37
279	1623.39	245.519	1039.4	279	104.186	245.519	1107.6	279	11.4399	279	220.232	586.76	26.9011	279	4478.16
280.5	1211.34	246.777	1051.1	280.5	474.336	246.777	1071	280.5	0	280.5	298.102	587.963	21.2892	280.5	3869.57
282	809.487	248.034	1045.52	282	654.227	248.034	1052.47	282	10.5596	282	306.278	589.164	13.8288	282	3275.47
283.5	346.273	249.292	1061.22	283.5	334.082	249.292	1041.51	283.5	12.0718	283.5	143.765	590.366	5.13273	283.5	2715.99
285	0	250.55	1074.92	285	0	250.55	1021.04	285	0	285	0	591.568	-4.05807	285	2233.93
286.5	0	251.806	1000.9	286.5	19.2617	251.806	977.483	286.5	4.82227	286.5	95.0696	592.768	-12.9441	286.5	1887.26
288	218.347	253.064	920.885	288	264.111	253.064	907.401	288	129.222	288	270.331	593.969	-20.7537	288	1647.05
289.5	296.343	254.321	836.149	289.5	250.695	254.321	817.751	289.5	226.444	289.5	241.014	595.169	-26.8396	289.5	1354.82
291	135.318	255.577	707.547	291	60.5547	255.577	720.845	291	166.474	291	80.9835	596.37	-30.7708	291	955.909
292.5	0	256.833	599.665	292.5	0	256.833	627.787	292.5	40.3086	292.5	0	597.57	-32.4016	292.5	554.948
294	0	258.09	522.219	294	14.8301	258.09	544.207	294	0	294	39.9089	598.771	-31.8988	294	262.071
295.5	172.789	259.345	488.902	295.5	94.8652	259.345	469.981	295.5	22.9038	295.5	180.241	599.97	-29.716	295.5	176.328
297	302.483	260.601	408.17	297	142.836	260.601	401.92	297	62.4619	297	260.449	601.17	-26.5138	297	235.284
298.5	184.713	261.857	315.138	298.5	85.3867	261.857	337.107	298.5	29.5561	298.5	161.843	602.369	-23.0389	298.5	204.933
300	70.2891	263.111	285.965	300	14.6738	263.111	274.837	300	0	300	24.6609	603.569	-19.9845	300	61.6299
301.5	151.646	264.367	210.653	301.5	25.5645	264.367	216.583	301.5	36.8784	301.5	0	604.767	-17.8628	301.5	0
303	179.565	265.621	145.76	303	26.8428	265.621	164.722	303	52.2744	303	57.332	605.967	-16.9167	303	0
304.5	46.6484	266.876	115.442	304.5	0	266.876	121.157	304.5	4.56396	304.5	138.14	607.165	-17.0891	304.5	0
306	0	268.131	79.6948	306	53.4395	268.131	86.6207	306	0	306	202.132	608.364	-18.0574	306	0
307.5	73.208	269.385	55.5216	307.5	216.515	269.385	60.695	307.5	49.2236	307.5	213.166	609.562	-19.3216	307.5	62.2881
309	201.154	270.639	34.9085	309	222.947	270.639	42.2021	309	110.494	309	162.085	610.759	-20.3254	309	121.545
310.5	253.643	271.892	26.0096	310.5	41.2393	271.892	29.5971	310.5	125.495	310.5	68.1401	611.958	-20.5818	310.5	68.4971
312	141.368	273.146	18.1165	312	0	273.146	21.2333	312	64.249	312	0	613.155	-19.7748	312	0
313.5	0	274.399	9.07766	313.5	183.617	274.399	15.557	313.5	1.51514	313.5	0	614.353	-17.8175	313.5	41.6914
315	0	275.653	24.9045	315	296.521	275.653	11.2866	315	47.2529	315	51.6293	615.55	-14.8568	315	168.385
316.5	160.263	276.905	0	316.5	192.096	276.905	7.5713	316.5	137.198	316.5	102.182	616.748	-11.2297	316.5	126.871
318	292.583	278.158	3.01775	318	53.6406	278.158	4.04453	318	124.234	318	99.0885	617.944	-7.3833	318	0
319.5	316.672	279.41	2.04422	319.5	0	279.41	0.749765	319.5	29.3203	319.5	51.5765	619.14	-3.78044	319.5	0
321	237.242	280.663	-3.35804	321	0	280.663	-2.05073	321	0	321	30.0637	620.337	-0.811831	321	68.6133
322.5	169.397	281.914	-9.61284	322.5	106.474	281.914	-4.08839	322.5	73.4165	322.5	60.7715	621.533	1.26897	322.5	46.9551
324	208.18	283.167	7.9849	324	305.804	283.167	-5.25394	324	156.216	324	86.5656	622.729	2.37679	324	0
325.5	246.971	284.418	-19.7099	325.5	430.83	284.418	-5.63939	325.5	159.44	325.5	74.2671	623.925	2.59083	325.5	44.793
327	219.102	285.67	-5.54343	327	350.578	285.67	-5.46785	327	127.213	327	71.9923	625.121	2.12055	327	106.736
328.5	186.552	286.92	0.770492	328.5	200.251	286.92	-4.93291	328.5	146.184	328.5	116.008	626.316	1.25188	328.5	70.9346
330	120.204	288.172	-5.49304	330	149.687	288.172	-4.06742	330	209.001	330	176.615	627.512	0.285928	330	24.1221
331.5	11.668	289.422	-1.75912	331.5	152.604	289.422	-2.72615	331.5	208.125	331.5	201.778	628.706	-0.517249	331.5	69.5107
333	0	290.673	-4.02392	333	148.633	290.673	-0.74397	333	90.7935	333	167.537	629.901	-0.981039	333	108.837
334.5	22.9668	291.923	0	334.5	171.169	291.923	1.83714	334.5	0	334.5	102.625	631.096	-1.03441	334.5	51.6699
336	0	293.174	3.10061	336	236.391	293.174	4.62505	336	55.5562	336	51.4736	632.29	-0.712666	336	35.8984
337.5	0	294.423	6.05403	337.5	265.233	294.423	6.97312	337.5	213.788	337.5	45.9635	633.484	-0.138972	337.5	155.847
339	177.368	295.672	29.2975	339	146.08	295.672	8.28091	339	275.352	339	95.2078	634.679	0.508031	339	194.899
340.5	344.117	296.923	-4.74194	340.5	0	296.923	8.32239	340.5	226.823	340.5	141.825	635.873	1.03303	340.5	35.5381
342	324.554	298.171	-6.06711	342	0	298.171	7.36128	342	175.874	342	129.856	637.066	1.26138	342	0
343.5	224.734	299.421	28.8849	343.5	128.338	299.421	5.94936	343.5	162.654	343.5	120.862	638.259	1.06818	343.5	241.177
345	131.796	300.67	-6.01167	345	243.619	300.67	4.56731	345	145.791	345	186.969	639.453	0.394551	345	376.129
346.5	42.0352	301.918	7.66316	346.5	253.286	301.918	3.35211	346.5	90.5889	346.5	246.223	640.646	-0.750146	346.5	191.439
348	0	303.167	-0.523417	348	170.988	303.167	2.1199	348	23.4917	348	204.202	641.839	-2.29824	348	0
349.5	0	304.415	-12.1386	349.5	92.8701	304.415	0.637448	349.5	0	349.5	148.421	643.031	-4.14087	349.5	0
351	5.79395	305.662	18.1076	351	89.5039	305.662	-1.11011	351	27.1719	351	181.96	644.225	-6.14664	351	49.9795
352.5	67.5019	306.911	-2.07893	352.5	154.263	306.911	-2.88948	352.5	97.9033	352.5	208.223	645.417	-8.17642	352.5	131.398
354	110.206	308.158	-11.1127	354	189.882	308.158	-4.45109	354	123.328	354	106.126	646.608	-10.0917	354	119.017
355.5	39.0752	309.405	-14.7265	355.5	97.5772	309.405	-5.8167	355.5	53.98	355.5	0	647.8	-11.7562	355.5	18.0234
357	0	310.653	-0.621631	357	0	310.653	-7.3229	357	0	357	54.2203	648.991	-13.0351	357	0
358.5	26.4297	311.9	-3.6654	358.5	5.55371	311.9	-9.33706	358.5	2.35449	358.5	190.336	650.184	-13.7945	358.5	52.6416
360	44.2803	313.146	-22.1278	360	138.549	313.146	-11.8466	360	29.2471	360	241.518	651.375	-13.9085	360	47.999
361.5	67.2109	314.393	3.68848	361.5	143.417	314.393	-14.2666	361.5	52.5181	361.5	185.01	652.566	-13.2729	361.5	0
363	197.325	315.639	-17.7839	363	12.1602	315.639	-15.6781	363	106.561	363	93.7373	653.757	-11.8261	363	70.6846
364.5	358.199	316.885	-47.6762	364.5	0	316.885	-15.3811	364.5	139.849	364.5	107.802	654.947	-9.57049	364.5	250.66
366	535.278	318.132	0	366	172.52	318.132	-13.3619	366	153.088	366	268.304	656.137	-6.58756	366	358.934
367.5	825.323	319.377	0.134356	367.5	456.809	319.377	-10.315	367.5	232.147	367.5	389.569	657.327	-3.03995	367.5	418.611
369	1239.86	320.622	-10.1513	369	727.839	320.622	-7.1861	369	406.323	369	370.831	658.519	0.844051	369	595.743
370.5	1800.22	321.867	-6.15693	370.5	986.26	321.867	-4.55986	370.5	704.527	370.5	351.827	659.708	4.80232	370.5	1007.72
372	2507.06	323.113	-3.44384	372	1329.51	323.113	-2.36685	372	1172.05	372	425.21	660.898	8.58074	372	1718.81
373.5	3242.71	324.358	5.41052	373.5	1873.58	324.358	-0.126182	373.5	1804.22	373.5	544.205	662.087	11.9756	373.5	2605.77
375	4000.76	325.602	-4.45386	375	2572.34	325.602	2.47524	375	2480.88	375	675.313	663.277	14.8654	375	3482.7
376.5	4877.9	326.846	-0.738241	376.5	3242.03	326.846	5.15762	376.5	2994.6	376.5	821.34	664.466	17.2231	376.5	4382
378	5678.54	328.09	10.5374	378	3773.61	328.09	7.15433	378	3302.65	378	964.193	665.654	19.1072	378	5381.96
379.5	6019.87	329.335	27.9617	379.5	4124.98	329.335	7.80237	379.5	3489.21	379.5	1063.42	666.843	20.6326	379.5	6285.18
381	5987.31	330.578	-3.04138	381	4254.15	330.578	7.16614	381	3531.3	381	1098.68	668.031	21.9317	381	6863.06
382.5	6046.36	331.822	7.10425	382.5	4205.59	331.822	6.16941	382.5	3417.8	382.5	1098.69	669.22	23.1159	382.5	7202.04
384	6229.73	333.065	-4.46887	384	4112.8	333.065	6.09116	384	3303.33	384	1121.29	670.408	24.2492	384	7387.16
385.5	6123.57	334.308	4.52802	385.5	3964.54	334.308	7.75619	385.5	3243.9	385.5	1170.92	671.596	25.3391	385.5	7139.35
387	5688.19	335.552	21.8136	387	3617.84	335.552	11.0296	387	3007.27	387	1131.7	672.785	26.3468	387	6281.87
388.5	5316.02	336.794	1.5218	388.5	3107.06	336.794	14.9909	388.5	2473.44	388.5	910.549	673.972	27.2104	388.5	5242.33
390	5172.63	338.037	32.8087	390	2676.38	338.037	18.6371	390	1942.8	390	646.219	675.159	27.8714	390	4387.51
391.5	5087.98	339.279	31.0968	391.5	2425.83	339.279	21.5683	391.5	1648.33	391.5	512.803	676.346	28.2967	391.5	3611.91
393	4910.01	340.52	7.66625	393	2214.24	340.52	24.1123	393	1444.68	393	490.021	677.533	28.4882	393	2824.84
394.5	4673.1	341.762	15.3844	394.5	1987.17	341.762	26.8292	394.5	1236.19	394.5	515.952	678.72	28.479	394.5	2131.7
396	4386.62	343.004	36.5226	396	1821.55	343.004	29.8432	396	1150.87	396	522.658	679.907	28.3202	396	1649.33
397.5	3966.3	344.246	57.9507	397.5	1736.02	344.246	32.5846	397.5	1232.31	397.5	437.746	681.093	28.0649	397.5	1466.76
399	3502.91	345.487	23.3801	399	1771.27	345.487	34.1888	399	1337.43	399	344.262	682.278	27.7564	399	1561.93
400.5	3170.53	346.728	16.9496	400.5	1982.01	346.728	34.2275	400.5	1403.73	400.5	359.829	683.464	27.4249	400.5	1756.78
402	2903.19	347.969	48.099	402	2189.04	347.969	33.158	402	1470.02	402	427.758	684.65	27.0915	402	1999.68
403.5	2555.59	349.209	39.0997	403.5	2221.84	349.209	32.0894	403.5	1515.24	403.5	453.678	685.835	26.7741	403.5	2403.17
405	2131.79	350.45	16.3891	405	2179.14	350.45	32.0286	405	1493.35	405	439.909	687.021	26.4888	405	2913.72
406.5	1693.86	351.69	44.2398	406.5	2119.9	351.69	33.2136	406.5	1396.65	406.5	413.466	688.206	26.2403	406.5	3312.55
408	1316.84	352.93	15.9604	408	1929.66	352.93	35.0592	408	1260.48	408	395.277	689.391	26.0018	408	3586.31
409.5	1042.23	354.169	50.5324	409.5	1602.34	354.169	36.7454	409.5	1127.97	409.5	399.674	690.576	25.6917	409.5	3877.91
411	804.67	355.409	46.6831	411	1280.43	355.409	37.9251	411	1012.93	411	414.378	691.761	25.1585	411	4044.3
412.5	553.689	356.648	28.685	412.5	1021.75	356.648	38.9568	412.5	872.128	412.5	408.553	692.945	24.1898	412.5	3785.68
414	361.415	357.887	34.977	414	829.708	357.887	40.4815	414	657.378	414	353.843	694.129	22.5547	414	3228.99
415.5	270.604	359.126	54.6889	415.5	674.79	359.126	42.7709	415.5	404.807	415.5	263.756	695.314	20.0808	415.5	2701.56
417	172.136	360.365	37.4109	417	422.75	360.365	45.4699	417	162.996	417	174.583	696.496	16.7538	417	2209.2
418.5	27.6201	361.603	43.4141	418.5	109.586	361.603	48.0037	418.5	0	418.5	91.014	697.68	12.8166	418.5	1641.47
420	0	362.842	53.416	420	0	362.842	50.276	420	52.7178	420	22.1757	698.863	8.83607	420	1080.89
421.5	46.4492	364.08	58.1393	421.5	89.3916	364.08	52.9709	421.5	223.95	421.5	0	700.047	5.70806	421.5	653.104
423	34.2842	365.318	65.7125	423	166.387	365.318	57.0826	423	178.649	423	19.5571	701.23	4.58348	423	348.622
424.5	0	366.555	45.7169	424.5	218.159	366.555	63.0723	424.5	0	424.5	95.1894	702.413	6.71318	424.5	136.548
426	65.4893	367.793	63.0102	426	380.615	367.793	70.5495	426	0	426	222.074	703.596	13.234	426	55.1455
427.5	258.818	369.03	73.0146	427.5	568.043	369.03	79.1206	427.5	141.338	427.5	312.102	704.777	24.9349	427.5	105.291
429	368.639	370.267	107.879	429	593.397	370.267	90.0412	429	225.389	429	239.183	705.96	42.0527	429	129.169
430.5	356.659	371.504	103.744	430.5	503.992	371.504	107.365	430.5	231.514	430.5	128.866	707.142	64.1459	430.5	43.9434
432	256.48	372.741	114.748	432	400.876	372.741	137.183	432	193.617	432	182.869	708.324	90.0783	432	6.58398
433.5	126.201	373.977	158.324	433.5	241.808	373.977	184.65	433.5	93.8862	433.5	276.631	709.506	118.125	433.5	80.0029
435	104.521	375.214	216.328	435	62.9512	375.214	250.113	435	0	435	239.286	710.686	146.179	435	89.2686
436.5	151.509	376.45	302.054	436.5	0	376.45	326.708	436.5	32.1821	436.5	161.225	711.868	172.03	436.5	0
438	127.464	377.686	439.49	438	0	377.686	401.296	438	212.792	438	136.668	713.049	193.644	438	0
439.5	139.287	378.92	526.498	439.5	127.894	378.92	458.814	439.5	352.366	439.5	105.656	714.23	209.407	439.5	105.174
441	278.404	380.155	519.505	441	344.912	380.155	488.052	441	346.117	441	29.8882	715.41	218.286	441	194.361
442.5	372.963	381.391	506.651	442.5	438.599	381.391	485.868	442.5	249.953	442.5	0	716.591	219.891	442.5	200.324
444	261.227	382.626	460.948	444	300.88	382.626	457.705	444	103.97	444	43.6113	717.771	214.429	444	166.635
445.5	42.9365	383.861	414.955	445.5	164.861	383.861	414.334	445.5	0	445.5	73.4775	718.952	202.602	445.5	102.17
447	0	385.095	361.683	447	290.942	385.095	366.838	447	25.46	447	65.6429	720.131	185.457	447	0
448.5	130.432	386.33	317.83	448.5	645.567	386.33	322.548	448.5	115.964	448.5	52.471	721.311	164.248	448.5	0
450	300.671	387.564	261.558	450	961.923	387.564	283.796	450	143.613	450	27.6993	722.491	140.317	450	263.286
451.5	336.417	388.797	269.998	451.5	1017.69	388.797	249.447	451.5	178.438	451.5	24.821	723.669	115.018	451.5	540.819
453	276.612	390.031	222.006	453	944.18	390.031	217.719	453	242.952	453	64.5885	724.848	89.6631	453	422.034
454.5	167.559	391.265	170.305	454.5	1020.84	391.265	188.395	454.5	213.65	454.5	98.448	726.028	65.4914	454.5	191.046
456	42.7812	392.498	157.454	456	1109.16	392.498	163.345	456	90.3657	456	99.3611	727.206	43.6221	456	251.778
457.5	0	393.731	137.754	457.5	900.606	393.731	145.487	457.5	1.49756	457.5	87.1467	728.385	24.9929	457.5	322.638
459	49.6738	394.963	129.624	459	631.782	394.963	137.135	459	0	459	81.7084	729.563	10.2792	459	109.646
460.5	181.916	396.196	130.064	460.5	726.085	396.196	138.711	460.5	63.8599	460.5	95.7975	730.74	-0.192296	460.5	0
462	340.291	397.429	137.074	462	936.31	397.429	148.307	462	127.771	462	124.017	731.919	-6.50789	462	226.597
463.5	407.434	398.661	160.374	463.5	800.688	398.661	162.046	463.5	73.7612	463.5	133.1	733.097	-9.18439	463.5	420.515
465	419.461	399.892	183.956	465	477.48	399.892	174.987	465	0	465	103.863	734.274	-9.11988	465	291.748
466.5	486.872	401.124	192.677	466.5	285.486	401.124	182.303	466.5	34.5459	466.5	45.9401	735.452	-7.47337	466.5	87.0019
468	570.353	402.356	196.408	468	216.903	402.356	180.507	468	106.779	468	0	736.628	-5.48794	468	0
469.5	628.917	403.588	189.279	469.5	186.962	403.588	168.412	469.5	110.956	469.5	0	737.805	-4.28823	469.5	0
471	718.126	404.818	140.722	471	115.078	404.818	147.437	471	59.5356	471	30.8079	738.983	-4.69217	471	55.0293
472.5	910.585	406.05	114.593	472.5	0	406.05	121.03	472.5	0	472.5	62.8523	740.158	-7.07676	472.5	132.774
474	1263.53	407.281	94.035	474	0	407.281	93.3883	474	0	474	79.2654	741.335	-11.3269	474	185.943
475.5	1782.6	408.512	65.7571	475.5	45.7305	408.512	68.0277	475.5	50.019	475.5	68.2988	742.511	-16.8774	475.5	179.94
477	2441.25	409.741	52.4917	477	152.9	409.741	46.88	477	68.0063	477	40.8479	743.687	-22.839	477	198.338
478.5	3319.81	410.972	9.3638	478.5	263.456	410.972	30.2353	478.5	76.1846	478.5	28.1924	744.862	-28.1799	478.5	399.354
480	4605.83	412.202	15.3771	480	407.202	412.202	17.3619	480	233.802	480	80.605	746.038	-31.9249	480	736.368
481.5	6342.75	413.431	12.2517	481.5	639.855	413.431	7.27191	481.5	504.993	481.5	176.589	747.214	-33.3316	481.5	1060.16
483	8467.15	414.661	0.125086	483	1064.17	414.661	-0.799966	483	682.315	483	202.369	748.389	-32.0128	483	1415.29
484.5	11171.1	415.891	-7.86157	484.5	1794.94	415.891	-7.29876	484.5	910.354	484.5	156.467	749.565	-27.9858	484.5	1945.4
486	14782.9	417.119	-17.2757	486	2938.33	417.119	-12.4315	486	1582.4	486	163.738	750.739	-21.6481	486	2836.32
487.5	18967.7	418.348	-22.4011	487.5	4542.83	418.348	-16.2029	487.5	2706.7	487.5	309.368	751.914	-13.6924	487.5	4230.03
489	23011.7	419.577	-13.9565	489	6618.86	419.577	-18.3825	489	4058.87	489	617.688	753.088	-4.98297	489	6021.32
490.5	26856.9	420.805	-14.2306	490.5	9393.07	420.805	-18.5759	490.5	5736.74	490.5	985.757	754.263	3.57969	490.5	8097.82
492	30782	422.034	-32.926	492	13150.9	422.034	-16.5006	492	7964.32	492	1276.08	755.436	11.1842	492	10536.1
493.5	34631.9	423.261	-8.18888	493.5	17533.3	423.261	-12.3371	493.5	10462.2	493.5	1573.43	756.609	17.2059	493.5	13508.2
495	38106.7	424.489	-6.74301	495	21949.2	424.489	-6.89279	495	12811.5	495	2031.52	757.783	21.2687	495	17320.8
496.5	41039	425.717	3.84286	496.5	25868.1	425.717	-1.38633	496.5	14828.7	496.5	2564.56	758.956	23.2692	496.5	21918.8
498	43062.7	426.944	0	498	28790.6	426.944	3.01966	498	16319	498	2984.59	760.13	23.3662	498	26565.5
499.5	43558.3	428.172	5.59193	499.5	30609.2	428.172	5.62776	499.5	17152	499.5	3219.56	761.303	21.9405	499.5	30689.7
501	42429.4	429.398	12.8855	501	31452.3	429.398	6.31115	501	17369.6	501	3296.31	762.476	19.5318	501	34042.1
502.5	40311.2	430.626	13.8974	502.5	31387.4	430.626	5.32873	502.5	17011.1	502.5	3255.88	763.648	16.7582	502.5	36345.2
504	37507.2	431.851	-10.3683	504	30407.2	431.851	3.11228	504	16138.5	504	3120.7	764.82	14.2262	504	37298.1
505.5	33928.4	433.078	4.49447	505.5	28661.1	433.078	0.198569	505.5	15086.1	505.5	2984.57	765.993	12.442	505.5	37059.6
507	29766.4	434.305	-2.0628	507	26601.9	434.305	-2.70985	507	14172.5	507	2936.65	767.165	11.7329	507	36154.9
508.5	25479.9	435.53	-3.18846	508.5	24933.8	435.53	-4.80183	508.5	13545.5	508.5	2981.62	768.338	12.1946	508.5	35100.9
510	21804.9	436.757	-8.46573	510	24121.8	436.757	-5.45499	510	13271	510	3072.74	769.509	13.6736	510	34332.4
511.5	19891.9	437.982	-13.5914	511.5	24446.1	437.982	-4.61388	511.5	13447.2	511.5	3160.38	770.68	15.7932	511.5	33753.4
513	20286.5	439.208	5.28215	513	25329.8	439.208	-2.92941	513	13973.2	513	3289.67	771.852	18.022	513	33058
514.5	22703.2	440.432	-2.8527	514.5	25484.4	440.432	-1.42651	514.5	14439.9	514.5	3524.42	773.022	19.777	514.5	32095.1
516	25975.8	441.658	-4.83916	516	24929.6	441.658	-0.879432	516	14521.5	516	3750.62	774.193	20.541	516	30823.9
517.5	28845.8	442.882	12.466	517.5	24485.7	442.882	-1.31212	517.5	14118.1	517.5	3796.77	775.365	19.9746	517.5	29430.2
519	31121.3	444.107	-0.949674	519	23882.7	444.107	-2.01301	519	13233.2	519	3671.43	776.535	17.9956	519	27916.6
520.5	32733.6	445.331	-27.0745	520.5	22380.2	445.331	-2.02416	520.5	11834.6	520.5	3430.27	777.704	14.8091	520.5	25618.9
522	32927.1	446.554	16.8014	522	19979.5	446.554	-0.742733	522	10119.2	522	3056.21	778.876	10.879	522	22199.8
523.5	31125.7	447.779	-7.47423	523.5	17026.7	447.779	1.79364	523.5	8376.38	523.5	2551.34	780.045	6.84506	523.5	18234.5
525	27743.5	449.002	19.4017	525	13948.5	449.002	5.06446	525	6692.82	525	2023.38	781.214	3.40229	525	14311
526.5	23351.1	450.226	-12.3031	526.5	11023	450.226	8.43897	526.5	5094.39	526.5	1570.17	782.385	1.16771	526.5	10860.9
528	18580.9	451.449	18.1428	528	8262.69	451.449	11.4802	528	3717.18	528	1203.5	783.554	0.56438	528	8156.08
529.5	14227.4	452.673	30.298	529.5	5863.2	452.673	14.0378	529.5	2727.9	529.5	939.928	784.723	1.74651	529.5	6291.25
531	11101.8	453.895	6.03472	531	4261.22	453.895	16.2318	531	2151.89	531	779.401	785.891	4.58173	531	5192.71
532.5	9433.87	455.117	17.3315	532.5	3472.32	455.117	18.4166	532.5	1875.29	532.5	685.466	787.061	8.69176	532.5	4647.93
534	8817.51	456.341	9.92662	534	3022.44	456.341	21.0927	534	1734.41	534	619.217	788.229	13.5397	534	4409.17
535.5	8724.43	457.562	38.2242	535.5	2622.26	457.562	24.6489	535.5	1642.3	535.5	578.423	789.397	18.5414	535.5	4238.77
537	8546.28	458.785	27.5301	537	2205.25	458.785	28.9852	537	1575.07	537	598.172	790.565	23.1736	537	4121.81
538.5	8184.82	460.007	25.2569	538.5	1919.34	460.007	33.3574	538.5	1511.2	538.5	646.39	791.734	27.0551	538.5	4090.14
540	7775.65	461.228	42.1344	540	1919.17	461.228	36.7372	540	1352.78	540	589.747	792.902	29.9827	540	3871.21
541.5	7128.34	462.45	49.7212	541.5	1793.19	462.45	38.6289	541.5	1088.81	541.5	431.173	794.069	31.9213	541.5	3226.64
543	6110.62	463.671	32.8788	543	1097.3	463.671	39.7517	543	871.467	543	329.246	795.236	32.9546	543	2435.62
544.5	4789.13	464.891	32.8971	544.5	342.894	464.891	41.8977	544.5	691.242	544.5	298.02	796.403	33.2174	544.5	1769.09
546	3232.65	466.113	51.2039	546	145.491	466.113	46.8443	546	435.489	546	242.575	797.571	32.833	546	1146.23
547.5	1806.07	467.333	44.6522	547.5	191.365	467.333	55.0325	547.5	243.447	547.5	174.479	798.738	31.8748	547.5	541.568
549	869.704	468.553	68.9506	549	77.7578	468.553	65.0726	549	240.445	549	138.916	799.904	30.3658	549	146.068
550.5	423.287	469.775	75.5374	550.5	0	469.775	74.6201	550.5	224.631	550.5	99.3363	801.071	28.3138	550.5	18.5117
552	326.986	470.994	87.7065	552	90.0019	470.994	82.0378	552	79.3472	552	30.7717	802.237	25.7702	552	0
553.5	207.347	472.213	89.0057	553.5	105.229	472.213	87.5284	553.5	0	553.5	0	803.403	22.8884	553.5	5.55859
555	0	473.433	103.744	555	0	473.433	92.815	555	61.956	555	31.36	804.57	19.9594	555	90.2715
556.5	8.01758	474.653	68.6124	556.5	85.1162	474.653	99.6337	556.5	224.309	556.5	70.1826	805.735	17.4038	556.5	169.969
558	128.764	475.872	126.492	558	253.826	475.872	108.36	558	249.557	558	37.5936	806.901	15.7117	558	96.3193
559.5	31.9697	477.09	111.802	559.5	142.173	477.09	117.98	559.5	100.353	559.5	25.952	808.066	15.3399	559.5	0
561	0	478.31	124.82	561	0	478.31	127.403	561	8.77637	561	101.503	809.231	16.5878	561	62.9941
562.5	180.7	479.528	139.98	562.5	54.8506	479.528	136.887	562.5	50.2031	562.5	113.567	810.396	19.4838	562.5	212.813
564	350.2	480.746	157.71	564	231.325	480.746	148.223	564	97.1631	564	27.8496	811.56	23.7168	564	251.504
565.5	320.067	481.964	142.73	565.5	274.252	481.964	163.549	565.5	121.306	565.5	14.6702	812.725	28.6379	565.5	231.145
567	234.296	483.182	189.33	567	268.697	483.182	184.039	567	162.601	567	97.7271	813.889	33.344	567	221.162
568.5	180.311	484.401	196.769	568.5	300.076	484.401	209.971	568.5	177.875	568.5	160.342	815.053	36.8311	568.5	137.199
570	56.6641	485.618	215.08	570	264.599	485.618	242.438	570	94.0659	570	131.922	816.217	38.1892	570	0
571.5	0	486.835	307.101	571.5	192.886	486.835	285.298	571.5	4.19922	571.5	43.6877	817.38	36.7954	571.5	21.1953
573	165.288	488.052	309.981	573	131.012	488.052	345.418	573	32.2593	573	0	818.544	32.4592	573	336.611
574.5	449.885	489.269	416.852	574.5	0	489.269	430.433	574.5	80.0703	574.5	19.7706	819.709	25.4818	574.5	577.633
576	497.676	490.487	501.302	576	7.36621	490.487	545.131	576	44.8804	576	51.8856	820.872	16.6133	576	571.648
577.5	295.234	491.703	642.044	577.5	294.196	491.703	688.556	577.5	0	577.5	79.6636	822.035	6.91116	577.5	399.845
579	76.7666	492.919	829.635	579	346.688	492.919	853.121	579	57.3696	579	74.8176	823.198	-2.46671	579	225.069
580.5	0	494.135	1036.66	580.5	86.1807	494.135	1025.46	580.5	230.224	580.5	47.6101	824.36	-10.4879	580.5	239.859
582	74.1592	495.35	1247.68	582	33.4111	495.35	1187.99	582	330.305	582	80.2454	825.523	-16.4364	582	404.887
583.5	225.151	496.566	1385.13	583.5	241.037	496.566	1320.91	583.5	313.598	583.5	164.079	826.684	-20.0244	583.5	559.751
585	319.302	497.781	1452.72	585	363.371	497.781	1405.65	585	294.569	585	188.801	827.846	-21.3991	585	580.861
586.5	293.047	498.998	1469.02	586.5	344.283	498.998	1430.36	586.5	296.061	586.5	133.801	829.008	-21.0486	586.5	420.618
588	163.609	500.213	1447.34	588	319.766	500.213	1396.05	588	285.636	588	65.5508	830.169	-19.6354	588	288.156
589.5	81.7617	501.427	1360.93	589.5	327.283	501.427	1318.99	589.5	205.509	589.5	41.0904	831.331	-17.8053	589.5	335.887
591	231.198	502.642	1233.38	591	364.026	502.642	1226.15	591	50.9907	591	105.121	832.492	-16.0256	591	364.63
592.5	451.682	503.856	1112.7	592.5	303.543	503.856	1143.94	592.5	0	592.5	198.472	833.653	-14.4958	592.5	259.026
594	475.905	505.07	1018.86	594	56.1035	505.07	1086.84	594	111.715	594	215.534	834.814	-13.1522	594	188.02
595.5	347.427	506.284	979.022	595.5	0	506.284	1054	595.5	186.942	595.5	155.835	835.975	-11.7591	595.5	197.649
597	174.617	507.498	1030.76	597	241.427	507.498	1037.9	597	90.1675	597	62.6938	837.136	-10.0521	597	128.057
598.5	28.4639	508.712	1091.64	598.5	281.303	508.712	1039.61	598.5	0	598.5	0	838.296	-7.88201	598.5	0
600	0	509.925	1090.23	600	0	509.925	1078.68	600	3.01465	600	0	839.457	-5.30699	600	0
601.5	0	511.138	1114.12	601.5	0	511.138	1187.21	601.5	21.499	601.5	12.75	840.617	-2.59482	601.5	68.0601
603	46.7324	512.351	1202.71	603	345.129	512.351	1388.24	603	27.5093	603	18.2834	841.775	-0.124933	603	176.028
604.5	146.594	513.564	1464.3	604.5	535.907	513.564	1671.27	604.5	105.963	604.5	43.254	842.935	1.78663	604.5	216.162
606	195.385	514.777	1932.91	606	538.589	514.777	1982.92	606	211.725	606	84.9604	844.095	3.08872	606	119.532
607.5	174.604	515.989	2473.21	607.5	739.624	515.989	2242.56	607.5	279.046	607.5	133.996	845.254	4.15643	607.5	0
609	277.135	517.201	2812.67	609	953.321	517.201	2376.69	609	355.452	609	147.597	846.413	5.85064	609	0
610.5	731.449	518.413	2642.4	610.5	807.159	518.413	2352.53	610.5	524.669	610.5	77.4618	847.572	9.43618	610.5	155.464
612	1357.42	519.625	2126.43	612	692.382	519.625	2190.38	612	747.968	612	74.7067	848.73	16.3563	612	501.969
613.5	1759.73	520.837	1731.31	613.5	981.168	520.837	1947.83	613.5	888.531	613.5	274.752	849.888	27.902	613.5	1092.2
615	1981.44	522.048	1579.48	615	1380.96	522.048	1687.15	615	1029.58	615	399.881	851.047	44.8488	615	1843.8
616.5	2335.35	523.26	1508.36	616.5	1703.04	523.26	1446.84	616.5	1330.91	616.5	247.903	852.205	67.1511	616.5	2463.65
618	2852.5	524.471	1355.11	618	1944.98	524.471	1233.94	618	1582.95	618	174.184	853.363	93.7775	618	2834.44
619.5	3278.73	525.682	1064.27	619.5	2041.51	525.682	1037.84	619.5	1586.46	619.5	373.174	854.52	122.744	619.5	3046.25
621	3422.26	526.892	800.58	621	2099.04	526.892	851.794	621	1550.29	621	496.569	855.678	151.354	621	3140.69
622.5	3329.83	528.103	574.606	622.5	2174.51	528.103	685.095	622.5	1575.29	622.5	406.813	856.835	176.611	622.5	3108.73
624	3004.52	529.313	466.212	624	2031.18	529.313	558.243	624	1399.42	624	341.145	857.993	195.715	624	2888.06
625.5	2464.52	530.523	448.238	625.5	1685.32	530.523	487.329	625.5	1008.41	625.5	343.838	859.148	206.552	625.5	2411.93
627	1860.65	531.732	465.116	627	1429.85	531.732	471.371	627	665.051	627	252.297	860.305	208.051	627	1737.6
628.5	1288.12	532.941	464.863	628.5	1210.34	532.941	492.467	628.5	417.898	628.5	85.6021	861.462	200.356	628.5	992.5
630	947.845	534.151	551.599	630	922.079	534.151	527.476	630	297.33	630	36.3962	862.619	184.76	630	402.429
631.5	781.72	535.36	618.486	631.5	602.002	535.36	561.015	631.5	316.609	631.5	117.643	863.774	163.437	631.5	118.644
633	401.252	536.569	586.514	633	179.197	536.569	589.629	633	281.229	633	168.453	864.931	139.02	633	62.1948
634.5	0	537.778	547.681	634.5	0	537.778	615.204	634.5	119.871	634.5	126.377	866.087	114.136	634.5	106.782
636	6.33789	538.987	583.998	636	310.627	538.987	634.774	636	0	636	52.9182	867.241	90.9945	636	109
637.5	252.504	540.194	709.457	637.5	543.491	540.194	636.367	637.5	8.71826	637.5	10.2695	868.397	71.1055	637.5	40.7178
639	363.683	541.403	754.764	639	262.402	541.403	604.931	639	96.7817	639	0	869.553	55.1786	639	0
640.5	336.766	542.611	600.222	640.5	15.2881	542.611	533.703	640.5	148.269	640.5	36.6794	870.707	43.1991	640.5	8.92334
642	370.056	543.819	377.96	642	150.543	543.819	431.78	642	210.468	642	137.677	871.862	34.6402	642	149.153
643.5	452.552	545.027	254.988	643.5	390.667	545.027	321.622	643.5	279.517	643.5	207.577	873.017	28.7397	643.5	318.918
645	373.059	546.233	185.168	645	421.149	546.233	227.913	645	260.669	645	178.38	874.171	24.7635	645	371.521
646.5	140.921	547.44	142.627	646.5	207.099	547.44	165.448	646.5	200.897	646.5	119.239	875.325	22.1929	646.5	276.82
648	0	548.648	134.225	648	58.4824	548.648	133.908	648	142.423	648	100.192	876.48	20.7967	648	105.275
649.5	109.747	549.855	122.103	649.5	275.82	549.855	121.866	649.5	67.0884	649.5	142.548	877.633	20.5892	649.5	137.183
651	348.675	551.062	129.992	651	557.042	551.062	115.963	651	51.0835	651	189.233	878.787	21.703	651	439.202
652.5	400.847	552.267	101.023	652.5	474.772	552.267	108.47	652.5	106.478	652.5	144.492	879.94	24.2283	652.5	521.358
654	250.303	553.473	97.1924	654	243.45	553.473	98.9552	654	176.96	654	60.328	881.094	28.0734	654	254.42
655.5	99.4004	554.68	75.8012	655.5	167.3	554.68	90.7203	655.5	266.022	655.5	40.4106	882.247	32.8891	655.5	123.892
657	68.2363	555.886	85.4008	657	121.08	555.886	86.0566	657	288.067	657	57.153	883.399	38.0789	657	191.14
658.5	108.532	557.09	92.7121	658.5	5.49219	557.09	84.1062	658.5	195.281	658.5	56.9927	884.553	42.888	658.5	97.5137
660	151.325	558.296	89.6017	660	0	558.296	82.1314	660	145.177	660	54.8371	885.704	46.5452	660	0
661.5	275.637	559.501	77.9221	661.5	187.712	559.501	78.1819	661.5	221.974	661.5	86.085	886.857	48.415	661.5	291.944
663	429.257	560.705	63.3734	663	400.483	560.705	72.5563	663	256.766	663	127.901	888.009	48.122	663	573.057
664.5	347.19	561.91	67.6938	664.5	403.042	561.91	67.0908	664.5	141.063	664.5	115.307	889.161	45.6169	664.5	318.939
666	84.9189	563.115	61.5842	666	256.894	563.115	63.3071	666	64.916	666	63.634	890.312	41.1727	666	0
667.5	0	564.319	70.8955	667.5	185.494	564.319	61.1713	667.5	146.776	667.5	31.1726	891.465	35.3192	667.5	58.271
669	138.945	565.523	44.9267	669	220.208	565.523	59.36	669	267.801	669	17.6379	892.615	28.7366	669	277.82
670.5	289.107	566.728	63.5272	670.5	222.374	566.728	56.5231	670.5	280.979	670.5	31.6884	893.767	22.1372	670.5	370.703
672	210.901	567.93	57.85	672	89.6484	567.93	52.3373	672	119.813	672	77.6205	894.918	16.1598	672	227.236
673.5	64.7256	569.134	42.0212	673.5	0	569.134	47.5662	673.5	0	673.5	119.399	896.069	11.2944	673.5	0
675	217.221	570.338	54.9125	675	118.913	570.338	43.3132	675	132.761	675	168.6	897.219	7.8435	675	47.144
676.5	564.117	571.54	23.9453	676.5	272.704	571.54	40.1975	676.5	426.025	676.5	172.149	898.37	5.91387	676.5	295.86
678	609.132	572.744	35.9766	678	150.201	572.744	38.0715	678	516.969	678	62.1642	899.52	5.43069	678	266.193
679.5	289.29	573.946	49.7194	679.5	0	573.946	36.3265	679.5	368.493	679.5	0	900.671	6.16323	679.5	84.6558
681	15.6348	575.149	11.9015	681	44.5957	575.149	34.3835	681	246.438	681	52.5057	901.82	7.7572	681	102.703
682.5	0	576.352	52.2135	682.5	129.577	576.352	32.0161	682.5	292.728	682.5	70.1713	902.97	9.77369	682.5	183.381
684	87.8203	577.553	46.8172	684	146.392	577.553	29.3872	684	395.129	684	48.8211	904.119	11.7398	684	136.091
685.5	222.801	578.755	0	685.5	122.317	578.755	26.9196	685.5	408.876	685.5	120.554	905.268	13.2143	685.5	120.159
687	323.88	579.956	19.363	687	167.224	579.956	25.1293	687	323.829	687	226.47	906.418	13.8685	687	250.072
688.5	399.562	581.158	23.7244	688.5	372.51	581.158	24.4345	688.5	226.467	688.5	259.525	907.566	13.5718	688.5	403.603
690	480.185	582.359	40.2374	690	522.547	582.359	24.9561	690	230.927	690	234.465	908.716	12.4654	690	481.972
691.5	522.694	583.561	27.5989	691.5	434.3	583.561	26.3717	691.5	320.355	691.5	181.792	909.864	10.9998	691.5	457.591
693	455.428	584.761	15.9633	693	214.239	584.761	27.9615	693	280.781	693	120.715	911.012	9.91605	693	323.107
694.5	258.354	585.962	30.0462	694.5	0	585.962	28.875	694.5	69.5444	694.5	58.3635	912.161	10.1577	694.5	103.153
696	155.696	587.162	32.2707	696	0	587.162	28.5122	696	0	696	27.6138	913.308	12.7175	696	0
697.5	339.663	588.363	37.2136	697.5	260.178	588.363	26.7876	697.5	209.006	697.5	87.9983	914.456	18.4401	697.5	212.187
699	450.434	589.562	9.43955	699	336.978	589.562	24.1536	699	369.681	699	182.394	915.604	27.818	699	370.682
700.5	244.764	590.763	29.0825	700.5	97.6465	590.763	21.3954	700.5	233.85	700.5	171.902	916.751	40.826	700.5	137.882
702	150.723	591.962	21.7384	702	0	591.962	19.3612	702	16.4126	702	50.6445	917.898	56.8379	702	0
703.5	346.337	593.162	21.3929	703.5	162.163	593.162	18.7112	703.5	0	703.5	0	919.046	74.6535	703.5	211.407
705	503.625	594.36	-2.94975	705	312.764	594.36	19.7312	705	147.419	705	117.182	920.192	92.6425	705	300.275
706.5	405.95	595.56	28.9847	706.5	338.612	595.56	22.1819	706.5	223.823	706.5	230.963	921.339	108.986	706.5	95.4819
708	104.896	596.758	26.2121	708	238.164	596.758	25.2782	708	125.244	708	194.387	922.486	121.97	708	7.83545
709.5	0	597.958	39.7265	709.5	59.6025	597.958	27.9041	709.5	25.687	709.5	112.267	923.632	130.279	709.5	106.026
711	230.916	599.156	33.9539	711	0	599.156	29.1188	711	76.6863	711	96.3884	924.778	133.216	711	144.85
712.5	474.463	600.355	11.0398	712.5	172.608	600.355	28.7248	712.5	164.469	712.5	99.9396	925.923	130.818	712.5	126.252
714	469.916	601.552	39.9787	714	416.594	601.552	27.5373	714	167.831	714	95.6514	927.07	123.833	714	163.831
715.5	303.332	602.75	23.3461	715.5	404.738	602.75	27.0507	715.5	97.6228	715.5	148.118	928.215	113.558	715.5	178.396
717	95.1719	603.948	16.0035	717	198.958	603.948	28.6128	717	11.0542	717	212.491	929.36	101.591	717	83.5435
718.5	0	605.145	42.5223	718.5	63.0557	605.145	32.5813	718.5	0	718.5	186.843	930.505	89.5261	718.5	0
720	67.5532	606.343	33.0297	720	42.1397	606.343	38.0519	720	52.6677	720	138.629	931.65	78.6805	720	0
721.5	225.09	607.54	47.2586	721.5	51.5986	607.54	43.4023	721.5	130.332	721.5	153.702	932.796	69.8896	721.5	91.8687
723	341.928	608.736	50.779	723	81.2529	608.736	47.3318	723	113.531	723	154.275	933.94	63.4199	723	210.858
724.5	363.428	609.934	36.5764	724.5	150.101	609.934	49.7246	724.5	28.6643	724.5	83.196	935.084	59.0068	724.5	204.758
726	223.048	611.13	66.8067	726	176.948	611.13	51.7578	726	88.5644	726	9.48456	936.228	55.9995	726	119.169
727.5	6.46533	612.325	59.8985	727.5	124.615	612.325	55.1672	727.5	266.294	727.5	0	937.372	53.5729	727.5	140.598
729	0	613.522	48.8374	729	47.8213	613.522	61.1587	729	249.925	729	82.4585	938.517	50.9523	729	218.71
730.5	110.653	614.718	53.3578	730.5	0	614.718	69.654	730.5	71.2549	730.5	174.306	939.66	47.598	730.5	206.975
732	189.279	615.913	78.8696	732	55.5703	615.913	79.2978	732	87.4353	732	115.372	940.804	43.3093	732	108.74
733.5	195.292	617.109	103.25	733.5	308.423	617.109	88.1629	733.5	227.697	733.5	0	941.947	38.2307	733.5	0
735	66.1436	618.304	109.332	735	603.739	618.304	94.6572	735	203.541	735	16.8102	943.09	32.7658	735	0
736.5	0	619.499	103.854	736.5	673.632	619.499	98.0742	736.5	152.236	736.5	129.717	944.232	27.4306	736.5	143.62
738	110.036	620.693	75.2269	738	366.585	620.693	98.5503	738	203.832	738	208.129	945.375	22.6887	738	158.21
739.5	295.899	621.889	106.027	739.5	43.3272	621.889	96.5904	739.5	190.901	739.5	202.937	946.519	18.8141	739.5	28.9731
741	456.15	623.083	92.4106	741	0	623.083	92.5995	741	100.309	741	142.721	947.661	15.8186	741	45.2075
742.5	336.606	624.277	100.214	742.5	39.4756	624.277	86.7566	742.5	91.2747	742.5	100.311	948.803	13.4618	742.5	164.325
744	41.8242	625.471	78.1572	744	70.5898	625.471	79.2897	744	175.405	744	95.7602	949.945	11.3376	744	137.714
745.5	76.418	626.666	64.5391	745.5	103.613	626.666	70.8536	745.5	229.265	745.5	85.2366	951.086	9.01287	745.5	36.3887
747	270.262	627.859	74.4838	747	128.21	627.859	62.6268	747	228.421	747	57.2158	952.228	6.17704	747	20.856
748.5	211.889	629.052	32.0086	748.5	199.218	629.052	55.9327	748.5	276.799	748.5	64.5528	953.369	2.76019	748.5	28.1089
750	62.7832	630.245	60.3834	750	282.335	630.245	51.577	750	295.521	750	116.39	954.51	-1.01516	750	0
751.5	18.2495	631.439	42.8967	751.5	258.47	631.439	49.3427	751.5	131.078	751.5	160.803	955.651	-4.66581	751.5	27.3579
753	93.1782	632.632	50.9915	753	244.324	632.632	48.0551	753	0	753	170.049	956.792	-7.55793	753	146.386
754.5	289.03	633.824	54.6578	754.5	333.059	633.824	46.2486	754.5	81.4124	754.5	156.295	957.933	-9.06899	754.5	254.924
756	476.379	635.016	47.1841	756	300.358	635.016	43.0418	756	295.319	756	162.425	959.073	-8.76029	756	303.064
757.5	512.796	636.208	27.8403	757.5	85.3013	636.208	38.6321	757.5	455.867	757.5	174.308	960.214	-6.51511	757.5	302.198
759	410.706	637.4	34.7966	759	0	637.4	34.0626	759	437.917	759	104.002	961.354	-2.60463	759	292.859
760.5	339.238	638.593	28.6014	760.5	120.368	638.593	30.4282	760.5	309.505	760.5	0	962.494	2.33819	760.5	321.693
762	342.158	639.785	35.5477	762	356.482	639.785	28.1074	762	158.642	762	0	963.633	7.43403	762	384.733
763.5	252.576	640.976	17.9354	763.5	468.734	640.976	26.5748	763.5	59.4199	763.5	60.3439	964.773	11.7363	763.5	457.473
765	84.8076	642.167	25.7432	765	405.566	642.167	24.9144	765	167.656	765	89.4513	965.912	14.4323	765	505.775
766.5	60.2207	643.358	22.8409	766.5	339.786	643.358	22.5937	766.5	335.747	766.5	117.257	967.052	15.0186	766.5	513.414
768	240.554	644.549	32.4987	768	345.98	644.549	19.8636	768	362.463	768	175.999	968.191	13.4091	768	499.877
769.5	416.073	645.739	6.88792	769.5	281.046	645.739	17.4633	769.5	375.749	769.5	225.222	969.329	9.95064	769.5	458.359
771	383.343	646.93	15.1257	771	84.0537	646.93	15.8917	771	388.177	771	214.714	970.468	5.34361	771	353.302
772.5	191.013	648.12	7.5049	772.5	0	648.12	14.887	772.5	232.192	772.5	155.524	971.607	0.487606	772.5	222.965
774	39.1675	649.311	17.6026	774	140.638	649.311	13.5765	774	23.0588	774	99.8916	972.745	-3.71056	774	151.558
775.5	0	650.501	21.1219	775.5	304.298	650.501	11.2135	775.5	0	775.5	70.9179	973.882	-6.52124	775.5	182.055
777	0	651.69	13.0826	777	400.442	651.69	7.87829	777	86.2034	777	48.5444	975.02	-7.52765	777	296.289
778.5	91.3701	652.88	-6.10818	778.5	485.447	652.88	4.53061	778.5	112.848	778.5	16.6237	976.158	-6.68537	778.5	311.063
780	195.639	654.069	4.84253	780	539.866	654.069	2.30607	780	117.763	780	18.5455	977.295	-4.29777	780	141.364
781.5	200.782	655.258	-17.9168	781.5	500.166	655.258	1.57604	781.5	155.662	781.5	92.4213	978.433	-0.920123	781.5	0
783	235.762	656.447	13.6139	783	400.259	656.447	1.53153	783	210.445	783	181.672	979.57	2.77969	783	0
784.5	369.361	657.635	16.2861	784.5	366.972	657.635	0.657514	784.5	259.91	784.5	228.936	980.707	6.16756	784.5	90.6211
786	295.31	658.824	-15.3332	786	535.092	658.824	-2.21755	786	196.546	786	194.218	981.844	8.76344	786	239.401
787.5	37.7964	660.012	6.19904	787.5	766.124	660.012	-7.05544	787.5	41.0798	787.5	89.7415	982.98	10.3117	787.5	341.192
789	75.8433	661.2	-17.8488	789	690.885	661.2	-12.558	789	0	789	23.0619	984.116	10.7935	789	313.402
790.5	292.634	662.388	-23.0366	790.5	439.029	662.388	-16.9374	790.5	63.2961	790.5	24.1233	985.253	10.3875	790.5	138.628
792	224.981	663.576	-25.6544	792	420.717	663.576	-18.9403	792	91.866	792	42.4647	986.389	9.39809	792	34.459
793.5	20.7979	664.763	-22.4107	793.5	537.776	664.763	-18.4265	793.5	64.241	793.5	47.059	987.525	8.17227	793.5	120.579
795	0	665.951	-1.30853	795	552.061	665.951	-16.2052	795	19.9106	795	28.4421	988.66	7.02832	795	127.067
796.5	84.4419	667.138	-29.4949	796.5	456.848	667.138	-13.3825	796.5	0	796.5	7.52216	989.796	6.20777	796.5	0
798	161.175	668.325	7.60881	798	305.711	668.325	-10.7708	798	0	798	0	990.931	5.85536	798	35.898
799.5	151.364	669.512	-17.7175	799.5	256.817	669.512	-8.71952	799.5	1.83008	799.5	12.5507	992.066	6.02123	799.5	241.111
801	165.317	670.697	-11.3309	801	449.482	670.697	-7.32205	801	84.5652	801	76.1592	993.2	6.67546	801	315.184
802.5	290.154	671.883	-4.79575	802.5	805.48	671.883	-6.66374	802.5	258.299	802.5	177.962	994.335	7.72432	802.5	233.137
804	360.25	673.07	-7.41208	804	1018.46	673.07	-6.82082	804	328.184	804	227.189	995.47	9.02196	804	110.98
805.5	310.876	674.256	10.6931	805.5	875.045	674.256	-7.64227	805.5	165.225	805.5	147.604	996.605	10.3768	805.5	45.1514
807	215.312	675.441	-17.9203	807	614.138	675.441	-8.58016	807	0	807	27.9014	997.738	11.5581	807	84.2856
808.5	107.638	676.627	-25.6751	808.5	492.541	676.627	-8.8077	808.5	33.3367	808.5	2.22479	998.872	12.3098	808.5	168.389
810	41.8472	677.813	0	810	357.499	677.813	-7.61199	810	87.9934	810	73.0303	1000.01	12.3783	810	226.262
811.5	23.1699	678.998	3.10508	811.5	107.102	678.998	-4.80779	811.5	7.80176	811.5	169.173	1001.14	11.5558	811.5	199.48
813	52.4375	680.182	-15.2093	813	38.206	680.182	-0.880517	813	0	813	167.887	1002.27	9.73154	813	106.96
814.5	144.908	681.367	5.61576	814.5	261.218	681.367	3.23305	814.5	148.176	814.5	72.6073	1003.41	6.94124	814.5	29.6797
816	147.438	682.551	22.0113	816	450.936	682.551	6.58103	816	240.153	816	57.1983	1004.54	3.39855	816	0
817.5	0	683.736	-0.74357	817.5	346.495	683.736	8.59261	817.5	140.276	817.5	99.3751	1005.67	-0.50583	817.5	0
819	0	684.92	7.94202	819	34.313	684.92	9.27805	819	0	819	63.0538	1006.81	-4.24277	819	40.5957
820.5	168.171	686.104	18.9076	820.5	0	686.104	9.19836	820.5	21.9805	820.5	9.24744	1007.94	-7.21983	820.5	118.083
822	283.818	687.287	4.44372	822	299.427	687.287	9.27761	822	196.621	822	0	1009.07	-8.88167	822	103.638
823.5	214.075	688.471	-5.58069	823.5	423.292	688.471	10.5027	823.5	225.724	823.5	14.7233	1010.2	-8.8142	823.5	0
825	208.187	689.654	34.0954	825	254.497	689.654	13.5574	825	123.394	825	115.334	1011.33	-6.8312	825	0
826.5	216.417	690.838	5.35101	826.5	367.762	690.838	18.469	826.5	66.3296	826.5	240.561	1012.47	-3.02318	826.5	54.8379
828	55.9805	692.021	22.1771	828	701.89	692.021	24.4506	828	23.7646	828	258.145	1013.6	2.24431	828	48.2993
829.5	4.06055	693.203	36.4237	829.5	769.429	693.203	30.1036	829.5	47.1494	829.5	135.171	1014.73	8.38267	829.5	43.0063
831	178.368	694.386	29.3998	831	679.19	694.386	33.9956	831	177.637	831	15.9185	1015.86	14.6745	831	155.521
832.5	275.127	695.568	49.3664	832.5	698.429	695.568	35.3692	832.5	268.058	832.5	83.9127	1016.99	20.3895	832.5	218.942
834	218.244	696.751	27.6125	834	699.603	696.751	34.5715	834	307.724	834	214.294	1018.12	24.9005	834	119.254
835.5	95.2993	697.932	51.1597	835.5	510.261	697.932	32.9198	835.5	335.136	835.5	192.421	1019.25	27.7761	835.5	49.5791
837	0	699.114	5.98628	837	208.906	699.114	32.0277	837	219.52	837	119.997	1020.38	28.8349	837	92.5718
838.5	11.9512	700.296	38.2329	838.5	0	700.296	32.9994	838.5	0	838.5	129.067	1021.51	28.1537	838.5	124.811
840	70.0352	701.476	28.2005	840	51.8032	701.476	35.977	840	0	840	116.757	1022.64	26.0319	840	94.0034
841.5	165.659	702.658	42.8871	841.5	320.285	702.658	40.3104	841.5	201.585	841.5	56.7878	1023.77	22.9238	841.5	23.6934
843	380.635	703.839	52.9943	843	418.801	703.839	45.2106	843	235.534	843	93.1714	1024.9	19.3532	843	0
844.5	619.182	705.019	56.5419	844.5	286.44	705.019	50.4093	844.5	141.39	844.5	187.387	1026.03	15.8287	844.5	87.8091
846	760.805	706.2	47.789	846	130.126	706.2	56.3808	846	210.932	846	173.985	1027.16	12.7744	846	190.308
847.5	917.781	707.381	45.9061	847.5	215.422	707.381	63.9769	847.5	373.271	847.5	136.642	1028.29	10.4847	847.5	263.902
849	1356.13	708.56	88.3043	849	761.724	708.56	73.7168	849	560.696	849	239.939	1029.42	9.10844	849	465.264
850.5	2200.38	709.741	66.7014	850.5	1537.75	709.741	85.1936	850.5	900.704	850.5	349.648	1030.55	8.65875	850.5	774.328
852	3185.96	710.921	120.669	852	2182.27	710.921	96.9852	852	1312.7	852	333.321	1031.68	9.04223	852	966.644
853.5	4205.11	712.1	108.637	853.5	2794.86	712.1	107.119	853.5	1768.7	853.5	468.464	1032.81	10.0982	853.5	1274.91
855	5540.8	713.28	108.605	855	3619.28	713.28	113.855	855	2369.5	855	844.773	1033.93	11.6385	855	2174.96
856.5	7189.77	714.46	116.722	856.5	4542.81	714.46	116.37	856.5	2958.93	856.5	1078.54	1035.06	13.4792	856.5	3663.52
858	8789.4	715.638	122.831	858	5248.49	715.638	115.016	858	3370.34	858	1119.56	1036.19	15.4618	858	5453.26
859.5	9921.59	716.817	123.089	859.5	5465.93	716.817	111.051	859.5	3514.96	859.5	1182.97	1037.32	17.4601	859.5	6938.59
861	10335.3	717.995	99.3479	861	5306.04	717.995	106.014	861	3378.83	861	1209.84	1038.44	19.3772	861	7810.41
862.5	10045.4	719.174	89.8861	862.5	4943.75	719.174	101.06	862.5	3062.03	862.5	1116.91	1039.57	21.1364	862.5	8378.13
864	9164.58	720.351	104.995	864	4121.97	720.351	96.5751	864	2620.11	864	999.956	1040.7	22.6731	864	8598.3
865.5	7741.14	721.53	84.1134	865.5	2902.76	721.53	92.2343	865.5	2025.14	865.5	888.246	1041.83	23.9315	865.5	8068.35
867	5972.88	722.709	97.9415	867	2020.2	722.709	87.4271	867	1307.72	867	690.654	1042.95	24.8696	867	6917.1
868.5	4278.57	723.885	82.6212	868.5	1560.84	723.885	81.7835	868.5	707.908	868.5	430.96	1044.08	25.4732	868.5	5532.86
870	3065.82	725.064	76.3093	870	1063.47	725.064	75.4837	870	500.1	870	233.855	1045.21	25.7748	870	4065.86
871.5	2161.13	726.24	58.709	871.5	588.75	726.24	69.189	871.5	462.471	871.5	145.996	1046.33	25.8714	871.5	2625.19
873	1251.64	727.418	75.2477	873	324.59	727.418	63.635	873	265.787	873	147.11	1047.46	25.9343	873	1400.03
874.5	576.861	728.594	48.0773	874.5	138.574	728.594	59.2019	874.5	68.7197	874.5	162.409	1048.58	26.2049	874.5	561.581
876	354.84	729.771	57.1865	876	0	729.771	55.7324	876	49.9739	876	141.175	1049.71	26.9715	876	219.328
877.5	275.714	730.947	49.5862	877.5	0	730.947	52.7372	877.5	61.6082	877.5	74.4014	1050.83	28.5301	877.5	183.245
879	119.117	732.124	58.4154	879	39.5293	732.124	49.8081	879	29.6631	879	0	1051.96	31.1308	879	90.4941
880.5	92.4712	733.299	43.8155	880.5	0	733.299	46.9322	880.5	144.558	880.5	63.0788	1053.09	34.9214	880.5	0
882	289.777	734.476	52.7847	882	11.1528	734.476	44.4491	882	309.103	882	211.985	1054.21	39.898	882	49.6728
883.5	493.495	735.651	23.7549	883.5	205.386	735.651	42.7027	883.5	202.111	883.5	175.399	1055.33	45.8724	883.5	85.4356
885	417.575	736.826	39.1551	885	291.381	736.826	41.6493	885	0	885	65.6659	1056.46	52.4667	885	9.50439
886.5	104.303	738.002	59.2748	886.5	133.338	738.002	40.7735	886.5	0	886.5	124.466	1057.58	59.1385	886.5	0
888	0	739.177	33.2449	888	0	739.177	39.4029	888	165.047	888	223.974	1058.71	65.2344	888	57.5654
889.5	68.7065	740.352	34.9351	889.5	0.20215	740.352	37.2083	889.5	361.67	889.5	236.249	1059.83	70.0689	889.5	147.121
891	183.067	741.526	40.4758	891	201.902	741.526	34.508	891	446.791	891	276.856	1060.96	73.0157	891	218.269
892.5	257.421	742.7	34.3065	892.5	456.523	742.7	32.1163	892.5	412.459	892.5	387.746	1062.08	73.6007	892.5	243.697
894	331.544	743.875	15.7067	894	500.614	743.875	30.8217	894	334.043	894	491.754	1063.2	71.5814	894	160.675
895.5	366.232	745.049	30.5374	895.5	395.33	745.049	30.8653	895.5	265.805	895.5	561.821	1064.33	67.0013	895.5	0
897	340.221	746.224	31.0776	897	340.483	746.224	31.8	897	254.495	897	607.288	1065.45	60.207	897	18.0322
898.5	269.452	747.397	52.6188	898.5	390.207	747.397	32.8394	898.5	256.245	898.5	594.015	1066.57	51.8231	898.5	284.069
900	185.844	748.57	25.88	900	467.263	748.57	33.4147	900	214.917	900	516.314	1067.7	42.6831	900	441.511
901.5	253.962	749.744	22.5607	901.5	405.75	749.744	33.5252	901.5	168.768	901.5	519.744	1068.82	33.7236	901.5	425.14
903	387.139	750.917	34.8219	903	221.108	750.917	33.6161	903	129.228	903	628.419	1069.94	25.8525	903	385.828
904.5	242.753	752.09	43.2231	904.5	90.7803	752.09	34.0943	904.5	60.5635	904.5	661.625	1071.06	19.8141	904.5	292.388
906	0	753.263	31.9143	906	19.4883	753.263	34.8878	906	26.512	906	589.582	1072.19	16.072	906	108.328
907.5	47.3003	754.435	27.456	907.5	0	754.435	35.4077	907.5	155.735	907.5	522.68	1073.31	14.7345	907.5	35.5723
909	262.625	755.607	41.7178	909	165.631	755.607	34.9595	909	382.937	909	518.987	1074.43	15.5399	909	167.589
910.5	351.843	756.78	49.829	910.5	563.502	756.78	33.2932	910.5	552.97	910.5	565.587	1075.55	17.9102	910.5	333.585
912	414.867	757.952	12.0907	912	841.137	757.952	30.8619	912	594.186	912	579.82	1076.67	21.0653	912	566.523
913.5	482.51	759.123	32.2029	913.5	832.519	759.123	28.5727	913.5	486.499	913.5	506.123	1077.79	24.178	913.5	1078.12
915	564.584	760.295	16.3246	915	784.997	760.295	27.2023	915	353.187	915	399.595	1078.91	26.5347	915	1730.74
916.5	687.263	761.467	45.8664	916.5	958.648	761.467	26.8942	916.5	371.476	916.5	356.138	1080.03	27.6665	916.5	2274.36
918	747.609	762.638	21.1286	918	1425.12	762.638	27.0847	918	610.808	918	431.875	1081.15	27.4173	918	2756.87
919.5	970.591	763.809	14.5308	919.5	2017.78	763.809	26.892	919.5	1026.55	919.5	569.544	1082.27	25.9326	919.5	3197.58
921	1430.33	764.979	36.3636	921	2474.61	764.979	25.676	921	1434.79	921	654.769	1083.4	23.5712	921	3394.31
922.5	1796.01	766.151	28.3353	922.5	2803.73	766.151	23.379	922.5	1618.16	922.5	693.112	1084.52	20.768	922.5	3345.98
924	2105.43	767.321	25.878	924	3144.42	767.321	20.4581	924	1671.41	924	751.672	1085.64	17.8871	924	3279.65
925.5	2384.2	768.491	-1.00925	925.5	3278.21	768.491	17.5017	925.5	1744.96	925.5	752.76	1086.75	15.1161	925.5	3048.11
927	2459.84	769.66	24.544	927	3076.45	769.66	14.846	927	1752.03	927	647.201	1087.87	12.4348	927	2387.01
928.5	2440.96	770.83	8.79674	928.5	2808.68	770.83	12.4341	928.5	1680.29	928.5	562.422	1088.99	9.67674	928.5	1660.91
930	2369.78	772.001	14.489	930	2557.53	772.001	9.98022	930	1499.8	930	560.426	1090.11	6.66566	930	1233.5
931.5	2122.24	773.17	9.18222	931.5	2206.11	773.17	7.28495	931.5	1122.85	931.5	590.759	1091.23	3.38323	931.5	954.871
933	1799.94	774.339	-6.41453	933	1736.57	774.339	4.48903	933	717.552	933	534.394	1092.35	0.108164	933	703.361
934.5	1422.94	775.508	18.1287	934.5	1183.23	775.508	2.13535	934.5	403.477	934.5	343.963	1093.47	-2.53322	934.5	500.896
936	895.913	776.677	-7.60804	936	711.511	776.677	1.01128	936	180.102	936	222.485	1094.59	-3.64121	936	358.498
937.5	439.692	777.845	-10.0643	937.5	477.01	777.845	1.84176	937.5	120.405	937.5	244.396	1095.71	-2.23948	937.5	263.475
939	264.968	779.015	-0.521536	939	401.491	779.015	4.93223	939	193.508	939	205.932	1096.82	2.45269	939	149.269
940.5	203.987	780.183	31.0222	940.5	305.892	780.183	9.89636	940.5	254.667	940.5	123.493	1097.94	10.7551	940.5	0
942	63.3472	781.351	0.715984	942	98.8447	781.351	15.5948	942	196.248	942	163.432	1099.06	22.3674	942	0
943.5	0	782.518	28.4103	943.5	0	782.518	20.4108	943.5	84.0178	943.5	253.272	1100.18	36.3961	943.5	108.407
945	121.335	783.686	22.524	945	143.23	783.686	22.821	945	73.6206	945	286.268	1101.29	51.6053	945	239.005
946.5	258.019	784.853	13.6383	946.5	402.817	784.853	22.0548	946.5	255.819	946.5	230.137	1102.41	66.8609	946.5	307.276
948	276.969	786.021	45.192	948	548.54	786.021	18.4887	948	495.428	948	139.857	1103.53	81.6716	948	323.577
949.5	218.423	787.188	13.7363	949.5	400.639	787.188	13.5251	949.5	470.14	949.5	171.249	1104.64	96.6736	949.5	275.489
951	65.7705	788.354	-12.2889	951	76.5938	788.354	8.96141	951	185.256	951	205.248	1105.76	113.898	951	161.516
952.5	39.5674	789.521	9.54537	952.5	0	789.521	6.18541	952.5	0	952.5	54.004	1106.88	136.684	952.5	49.5464
954	222.198	790.688	-3.48036	954	230.542	790.688	5.64999	954	83.4031	954	0	1107.99	169.185	954	0
955.5	311.524	791.854	4.78442	955.5	452.188	791.854	6.89146	955.5	357.068	955.5	197.092	1109.11	215.502	955.5	32.6528
957	193.477	793.02	39.4692	957	326.415	793.02	9.00638	957	443.561	957	303.819	1110.22	278.607	957	98.2693
958.5	20.6934	794.186	-10.836	958.5	2.8418	794.186	11.2186	958.5	303.981	958.5	186.429	1111.34	359.283	958.5	107.92
960	0	795.352	4.56876	960	0	795.352	13.1662	960	185.294	960	156.083	1112.46	455.331	960	130.08
961.5	159.609	796.517	29.6841	961.5	295.253	796.517	14.813	961.5	213.044	961.5	235.058	1113.57	561.296	961.5	239.939
963	277.493	797.683	11.9488	963	506.831	797.683	16.1841	963	295.236	963	174.633	1114.69	668.82	963	289.987
964.5	375.649	798.848	12.3541	964.5	543.265	798.848	17.2309	964.5	319.922	964.5	55.9935	1115.8	767.633	964.5	194.152
966	505.09	800.013	28.1894	966	468.193	800.013	17.9408	966	261.87	966	58.2352	1116.92	847.033	966	56.1475
967.5	336.017	801.178	22.7347	967.5	282.192	801.178	18.5553	967.5	137.196	967.5	112.186	1118.03	897.585	967.5	0
969	0	802.343	0	969	74.9497	802.343	19.6231	969	29.5017	969	141.18	1119.15	912.705	969	122.099
970.5	34.6538	803.507	29.5446	970.5	0	803.507	21.7566	970.5	51.2605	970.5	122.264	1120.26	889.811	970.5	319.079
972	407.889	804.671	27.6593	972	31.3467	804.671	25.2238	972	244.436	972	99.2615	1121.37	830.799	972	434.371
973.5	445.746	805.835	24.4839	973.5	81.5229	805.835	29.681	973.5	451.505	973.5	105.36	1122.49	741.759	973.5	465.35
975	181.47	806.999	30.8885	975	41.2935	806.999	34.2661	975	423.962	975	103.474	1123.6	631.972	975	413.656
976.5	24.0757	808.163	52.4332	976.5	25.2026	808.163	38.0096	976.5	184.51	976.5	103.583	1124.71	512.411	976.5	234.766
978	0	809.327	32.9778	978	106.801	809.327	40.2962	978	0	978	112.005	1125.83	394.045	978	29.0305
979.5	0	810.49	40.2332	979.5	254.632	810.49	41.086	979.5	0	979.5	120.664	1126.94	286.276	979.5	0
981	66.9282	811.653	52.2086	981	283.364	811.653	40.799	981	83.2471	981	95.3067	1128.05	195.785	981	0
982.5	86.8848	812.815	33.7448	982.5	124.634	812.815	40.0091	982.5	111.665	982.5	61.7742	1129.17	125.976	982.5	0
984	168.647	813.978	35.4402	984	0	813.978	39.1797	984	57.4844	984	142.564	1130.28	77.0443	984	55.2722
985.5	269.457	815.141	36.1256	985.5	51.8931	815.141	38.6042	985.5	38.2212	985.5	243.211	1131.39	46.5898	985.5	218.496
987	271.541	816.303	40.5217	987	333.087	816.303	38.5209	987	88.2449	987	223.013	1132.5	30.5831	987	378.392
988.5	405.042	817.465	47.2079	988.5	372.098	817.465	39.2552	988.5	203.825	988.5	235.131	1133.62	24.4416	988.5	443.711
990	724.458	818.628	42.7533	990	209.048	818.628	41.2368	990	322.69	990	337.816	1134.73	23.9958	990	383.433
991.5	1088.41	819.788	23.1609	991.5	500.361	819.788	44.8318	991.5	366.231	991.5	369.021	1135.84	26.1737	991.5	391.529
993	1492.06	820.95	49.9871	993	1002.15	820.95	50.0421	993	399.064	993	337.944	1136.95	29.324	993	627.553
994.5	1833.22	822.112	62.2533	994.5	994.933	822.112	56.2517	994.5	437.904	994.5	343.137	1138.06	33.1822	994.5	798.273
996	2101.86	823.273	76.6502	996	828.115	823.273	62.1963	996	463.504	996	408.207	1139.17	38.5598	996	817.525
997.5	2509.46	824.434	65.4871	997.5	1002.23	824.434	66.3075	997.5	541.319	997.5	537.304	1140.28	46.8716	997.5	1068.75
999	3153.57	825.594	51.1748	999	1294.59	825.594	67.3926	999	621.414	999	600.561	1141.39	59.6273	999	1448.7
1000.5	3785.49	826.755	81.8617	1000.5	1454.17	826.755	65.3514	1000.5	656.387	1000.5	533.019	1142.51	77.9846	1000.5	1512.41
1002	4109.58	827.915	66.4094	1002	1497.02	827.915	61.4843	1002	761.876	1002	472.369	1143.61	102.431	1002	1522.04
1003.5	4403.07	829.076	52.6663	1003.5	1558.58	829.076	58.043	1003.5	912.998	1003.5	461.348	1144.73	132.616	1003.5	1823.87
1005	5147.85	830.235	57.0747	1005	1782.01	830.235	57.1292	1005	1036.68	1005	465	1145.83	167.322	1005	2091.32
1006.5	6365.74	831.395	43.1924	1006.5	2116.81	831.395	59.5335	1006.5	1224.92	1006.5	516.057	1146.95	204.568	1006.5	2190
1008	7688.27	832.555	53.1601	1008	2399.95	832.555	64.323	1008	1432.63	1008	579.134	1148.05	241.793	1008	2449.55
1009.5	8633.3	833.715	95.1377	1009.5	2630.25	833.715	69.5566	1009.5	1509.6	1009.5	491.624	1149.16	276.116	1009.5	2833.6
1011	9208	834.873	71.8269	1011	2889.69	834.873	73.7348	1011	1541.88	1011	339.479	1150.27	304.639	1011	3080.6
1012.5	9701.41	836.033	82.2346	1012.5	3181.55	836.033	76.9478	1012.5	1714.21	1012.5	467.058	1151.38	324.776	1012.5	3442.35
1014	10276.5	837.192	70.0631	1014	3523.26	837.192	80.8156	1014	2015.81	1014	748.022	1152.49	334.565	1014	4159.67
1015.5	10835	838.35	83.7523	1015.5	3856.26	838.35	87.1635	1015.5	2297.85	1015.5	800.168	1153.6	332.946	1015.5	4904.59
1017	10873.6	839.509	77.7307	1017	4025.14	839.509	96.4339	1017	2459.7	1017	716.787	1154.71	319.934	1017	5436.38
1018.5	10299.2	840.667	129.14	1018.5	4054.47	840.667	107.136	1018.5	2511.58	1018.5	699.623	1155.82	296.668	1018.5	5759.7
1020	9546.92	841.824	111.68	1020	4078.34	841.824	116.883	1020	2434.96	1020	730.18	1156.93	265.297	1020	5836.34
1021.5	8668.34	842.983	132.518	1021.5	4030.17	842.983	124.263	1021.5	2255.51	1021.5	750.265	1158.03	228.716	1021.5	5595.18
1023	7391.23	844.141	129.777	1023	3689.09	844.141	130.015	1023	2030.66	1023	705.859	1159.14	190.179	1023	5007.7
1024.5	5864.32	845.298	143.327	1024.5	3056.73	845.298	136.455	1024.5	1750.84	1024.5	608.889	1160.25	152.856	1024.5	4157.51
1026	4554.31	846.455	127.447	1026	2425.42	846.455	145.656	1026	1540.91	1026	560.996	1161.36	119.414	1026	3354.12
1027.5	3353.72	847.612	145.707	1027.5	1993.9	847.612	158.115	1027.5	1433.48	1027.5	558.459	1162.47	91.702	1027.5	2728.48
1029	2120.65	848.769	171.687	1029	1692.92	848.769	173.477	1029	1301.02	1029	527.481	1163.57	70.5893	1029	2182.3
1030.5	1203.46	849.927	205.517	1030.5	1361.88	849.927	193.145	1030.5	1055.15	1030.5	443.336	1164.68	55.9895	1030.5	1780.64
1032	700.436	851.082	220.068	1032	975.308	851.082	222.532	1032	792.342	1032	356.593	1165.79	47.0446	1032	1616.28
1033.5	578.191	852.239	230.188	1033.5	686.903	852.239	270.226	1033.5	750.67	1033.5	385.789	1166.89	42.4197	1033.5	1465.52
1035	643.97	853.395	319.739	1035	608.668	853.395	343.132	1035	801.744	1035	430.212	1168	40.6317	1035	1246.6
1036.5	618.007	854.551	389.719	1036.5	700.216	854.551	439.785	1036.5	741.308	1036.5	345.287	1169.1	40.3415	1036.5	1309.28
1038	507.238	855.706	534.121	1038	824.408	855.706	546.248	1038	729.119	1038	346.105	1170.21	40.5478	1038	1651.16
1039.5	510.67	856.862	681.822	1039.5	813.728	856.862	638.283	1039.5	798.271	1039.5	488.131	1171.32	40.6607	1039.5	1911.51
1041	1081.9	858.018	794.512	1041	618.952	858.018	689.994	1041	850.378	1041	482.505	1172.42	40.4594	1041	1975.12
1042.5	1896.16	859.173	790.774	1042.5	570.874	859.173	684.917	1042.5	891.624	1042.5	370.12	1173.53	39.9732	1042.5	1897.97
1044	2077.9	860.329	661.325	1044	863.828	860.329	623.574	1044	843.691	1044	363.384	1174.63	39.3346	1044	1899.07
1045.5	1992.12	861.483	518.307	1045.5	1111.06	861.483	523.237	1045.5	868.791	1045.5	420.054	1175.74	38.655	1045.5	2037.9
1047	2308.1	862.638	345.708	1047	1190.84	862.638	410.052	1047	1126.43	1047	470.683	1176.84	37.9565	1047	2089.56
1048.5	2913.95	863.792	280.401	1048.5	1381	863.792	308	1048.5	1231.49	1048.5	441.003	1177.95	37.1695	1048.5	2195.58
1050	3554.48	864.947	214.672	1050	1682.74	864.947	230.553	1050	1109.2	1050	333.354	1179.05	36.1845	1050	2713.56
1051.5	4272.18	866.1	162.645	1051.5	2028.85	866.1	178.744	1051.5	1213.55	1051.5	336.22	1180.16	34.927	1051.5	3456.13
1053	5038.36	867.254	147.197	1053	2422.98	867.254	145.28	1053	1463.25	1053	436.207	1181.26	33.4235	1053	4055.67
1054.5	5544.45	868.408	131.749	1054.5	2692.31	868.408	121.126	1054.5	1462.6	1054.5	451.135	1182.37	31.8292	1054.5	4219.51
1056	5710.48	869.561	89.4425	1056	2675.24	869.561	100.433	1056	1313.52	1056	433.847	1183.47	30.4092	1056	4011.73
1057.5	5709.35	870.715	63.5647	1057.5	2433.84	870.715	81.7333	1057.5	1257.7	1057.5	486.996	1184.57	29.4758	1057.5	3868.41
1059	5558.63	871.867	68.8285	1059	2055	871.867	66.1135	1059	1290.17	1059	521.449	1185.68	29.3058	1059	3583.4
1060.5	5039.74	873.021	52.5307	1060.5	1619.85	873.021	54.6407	1060.5	1234.85	1060.5	452.303	1186.78	30.0627	1060.5	2772.46
1062	4064.59	874.173	55.2245	1062	1317.94	874.173	47.0344	1062	987.015	1062	301.667	1187.88	31.7476	1062	2064.31
1063.5	2984.11	875.325	39.3482	1063.5	1068.47	875.325	41.9846	1063.5	716.138	1063.5	193.843	1188.99	34.1927	1063.5	1814.49
1065	2119.2	876.479	32.7505	1065	727.759	876.479	38.2353	1065	563.369	1065	230.529	1190.09	37.0961	1065	1308.99
1066.5	1466.87	877.63	21.595	1066.5	366.218	877.63	35.278	1066.5	444.474	1066.5	323.972	1191.19	40.084	1066.5	618.259
1068	946.511	878.782	40.9988	1068	137.59	878.782	33.2012	1068	325.432	1068	368.722	1192.3	42.7808	1068	533.423
1069.5	452.188	879.934	38.4125	1069.5	202.221	879.934	32.1065	1069.5	257.517	1069.5	302.396	1193.4	44.8672	1069.5	719.832
1071	47.4697	881.085	33.3971	1071	265.35	881.085	31.7168	1071	164.832	1071	142.953	1194.5	46.1123	1071	630.083
1072.5	0	882.238	29.3701	1072.5	67.9292	882.238	31.465	1072.5	60.2395	1072.5	11.9179	1195.6	46.3784	1072.5	712.906
1074	128.028	883.388	22.2153	1074	0	883.388	30.8451	1074	116.126	1074	0	1196.7	45.605	1074	1038.57
1075.5	82.6716	884.539	33.7699	1075.5	115.244	884.539	29.6203	1075.5	222.509	1075.5	45.5316	1197.8	43.7862	1075.5	897.116
1077	114.654	885.691	28.0336	1077	205.348	885.691	27.7656	1077	188.756	1077	43.5216	1198.91	40.9551	1077	458.354
1078.5	346.269	886.841	31.4389	1078.5	256.907	886.841	25.3036	1078.5	159.332	1078.5	37.0185	1200.01	37.1845	1078.5	391.025
1080	262.458	887.991	23.4242	1080	132.055	887.991	22.2754	1080	203.306	1080	95.1527	1201.11	32.6026	1080	507.55
1081.5	0	889.141	22.4095	1081.5	0	889.141	18.882	1081.5	138.971	1081.5	107.881	1202.21	27.4164	1081.5	496.943
1083	7.60059	890.292	-2.32599	1083	138.711	890.292	15.5836	1083	0	1083	16.6052	1203.31	21.9283	1083	400.814
1084.5	205.527	891.442	22.9393	1084.5	319.525	891.442	12.9711	1084.5	28.8817	1084.5	0	1204.41	16.5309	1084.5	255.549
1086	297.548	892.591	9.06533	1086	291.166	892.591	11.4482	1086	256.001	1086	98.1161	1205.51	11.6724	1086	62.1558
1087.5	194.608	893.74	14.7714	1087.5	139.514	893.74	10.9897	1087.5	332.609	1087.5	133.645	1206.61	7.79292	1087.5	0
1089	0	894.89	2.31666	1089	0	894.89	11.2006	1089	171.255	1089	58.1329	1207.71	5.24152	1089	66.5581
1090.5	0	896.039	16.7327	1090.5	0	896.039	11.6428	1090.5	0	1090.5	7.57797	1208.81	4.1954	1090.5	88.9092
1092	269.779	897.188	12.2888	1092	253.378	897.188	12.1499	1092	48.3284	1092	67.5359	1209.91	4.60103	1092	0
1093.5	655.062	898.336	19.6956	1093.5	519.382	898.336	12.8688	1093.5	352.244	1093.5	192.203	1211.01	6.15753	1093.5	204.387
1095	1185.18	899.486	-1.45916	1095	414.038	899.486	13.997	1095	535.866	1095	186.803	1212.11	8.35217	1095	596.361
1096.5	1925.29	900.634	16.3776	1096.5	210.707	900.634	15.4689	1096.5	529.337	1096.5	48.7922	1213.21	10.5464	1096.5	723.002
1098	2903	901.782	25.3645	1098	637.989	901.782	16.8608	1098	561.414	1098	15.1707	1214.31	12.0985	1098	753.195
1099.5	3904.87	902.93	27.9213	1099.5	1364.59	902.93	17.6215	1099.5	773.529	1099.5	136.329	1215.41	12.4984	1099.5	976.872
1101	4928.84	904.077	-1.81118	1101	1927.63	904.077	17.4413	1101	1262.11	1101	349.739	1216.51	11.488	1101	1476.61
1102.5	6732.28	905.225	25.8856	1102.5	2713.48	905.225	16.4865	1102.5	2025.14	1102.5	565.377	1217.6	9.1385	1102.5	2277.35
1104	9725.23	906.373	23.0124	1104	4053.84	906.373	15.3427	1104	2967.23	1104	729.097	1218.7	5.8668	1104	3362.93
1105.5	13922.6	907.52	0	1105.5	6120.61	907.52	14.7125	1105.5	4025.31	1105.5	913.173	1219.8	2.38365	1105.5	4628.86
1107	20135.1	908.667	16.2441	1107	9036.98	908.667	15.0662	1107	5436.33	1107	1186.27	1220.9	-0.421417	1107	6073.92
1108.5	29240.3	909.814	23.7681	1108.5	12871.2	909.814	16.4448	1108.5	7559.19	1108.5	1616.56	1222	-1.63912	1108.5	8185.65
1110	39873.5	910.96	11.8636	1110	17318.1	910.96	18.5309	1110	10275.8	1110	2246.29	1223.09	-0.515698	1110	11405.4
1111.5	50540.4	912.107	18.2476	1111.5	22276.2	912.107	21.0158	1111.5	13427	1111.5	3091.15	1224.19	3.38684	1111.5	15979.9
1113	60692.1	913.253	34.4931	1113	28192.8	913.253	24.1878	1113	17033.9	1113	4151.74	1225.29	10.0777	1113	22501.6
1114.5	69472.5	914.399	23.5986	1114.5	34283.4	914.399	29.4928	1114.5	20565.1	1114.5	5229.02	1226.38	19.0925	1114.5	31327.9
1116	75850	915.545	21.8341	1116	38969.5	915.545	39.6772	1116	23231.3	1116	6020.67	1227.48	29.5302	1116	40413.6
1117.5	77857	916.692	47.3681	1117.5	41253.1	916.692	58.1202	1117.5	24460.6	1117.5	6558.52	1228.58	40.169	1117.5	47603.4
1119	74048.2	917.837	92.325	1119	40775.4	917.837	87.3137	1119	23972.1	1119	6900.76	1229.68	49.6432	1119	52082.2
1120.5	65963.1	918.982	106.992	1120.5	38660.2	918.982	127.028	1120.5	22402	1120.5	6781.6	1230.77	56.6543	1120.5	53688.4
1122	55715.8	920.127	163.099	1122	35199.2	920.127	173.194	1122	20153.1	1122	6139.34	1231.87	60.1778	1122	52674.3
1123.5	45289.7	921.272	216.196	1123.5	29576.1	921.272	218.406	1123.5	17170.6	1123.5	5313.39	1232.96	59.6329	1123.5	48922.8
1125	34922	922.417	287.723	1125	22762.7	922.417	254.2	1125	13629.5	1125	4412.89	1234.06	54.9794	1125	42434.9
1126.5	24353.2	923.562	309.969	1126.5	16396.5	923.562	274.142	1126.5	9873.39	1126.5	3372.17	1235.15	46.7281	1126.5	34065.2
1128	15489.1	924.706	301.498	1128	11215.2	924.706	276.162	1128	6670.33	1128	2395.52	1236.25	35.8582	1128	25298.8
1129.5	9706.71	925.85	253.606	1129.5	7453.69	925.85	262.863	1129.5	4547.25	1129.5	1697.01	1237.35	23.6593	1129.5	18097.8
1131	6318.99	926.994	237.854	1131	4624.48	926.994	239.719	1131	3235.63	1131	1201.96	1238.44	11.5245	1131	12978.5
1132.5	4402.54	928.138	197.953	1132.5	2648.31	928.138	212.327	1132.5	2387.54	1132.5	924.823	1239.54	0.732784	1132.5	9535.14
1134	3090.99	929.282	192.771	1134	1635.52	929.282	184.366	1134	1678.26	1134	940.193	1240.63	-7.73849	1134	7195.38
1135.5	2230.96	930.425	179.161	1135.5	1045.37	930.425	157.26	1135.5	1072.75	1135.5	886.755	1241.73	-13.3409	1135.5	5564.96
1137	2158.51	931.569	106.979	1137	698.036	931.569	131.323	1137	869.628	1137	570.399	1242.82	-15.9997	1137	4610.67
1138.5	2571.52	932.711	116.94	1138.5	779.799	932.711	107.186	1138.5	1130.1	1138.5	462.172	1243.91	-16.0751	1138.5	4080.41
1140	3092.31	933.854	73.7596	1140	1147.8	933.854	86.3077	1140	1524.82	1140	639.764	1245.01	-14.2517	1140	3644.5
1141.5	3995.2	934.996	64.8607	1141.5	1785.92	934.996	70.294	1141.5	1871.82	1141.5	757.367	1246.1	-11.3818	1141.5	3661.87
1143	5411.71	936.139	53.2504	1143	2821.44	936.139	59.7164	1143	2587.84	1143	860.078	1247.2	-8.3186	1143	4479.15
1144.5	7280.94	937.281	43.3615	1144.5	4297.16	937.281	53.5121	1144.5	3933.68	1144.5	1127.6	1248.29	-5.76831	1144.5	5886.51
1146	9682.39	938.424	58.6012	1146	6185.53	938.424	49.4879	1146	5312.48	1146	1496.33	1249.38	-4.18996	1146	8126.67
1147.5	12324.2	939.566	61.7123	1147.5	8221.9	939.566	45.5641	1147.5	6414.23	1147.5	1858.67	1250.48	-3.75477	1147.5	11785
1149	14457	940.708	31.9534	1149	9874.19	940.708	40.8264	1149	7412.79	1149	2123.65	1251.57	-4.36648	1149	15946.7
1150.5	16315.6	941.85	27.7745	1150.5	11189.2	941.85	35.6945	1150.5	8304.45	1150.5	2346.51	1252.66	-5.73173	1150.5	19422.3
1152	18468.7	942.991	33.167	1152	12494.1	942.991	31.2332	1152	9013.21	1152	2660	1253.75	-7.4588	1152	22273.6
1153.5	19803	944.131	20.5609	1153.5	13343.1	944.131	28.2484	1153.5	9137.38	1153.5	2780.1	1254.85	-9.16276	1153.5	24385.4
1155	19135.3	945.272	27.3835	1155	13012.1	945.272	26.8363	1155	8287.97	1155	2473.76	1255.94	-10.5539	1155	25142.8
1156.5	16909.8	946.414	43.6346	1156.5	11433.8	946.414	26.5572	1156.5	6880.06	1156.5	2200.68	1257.03	-11.4952	1156.5	24283
1158	14269.4	947.554	19.1685	1158	9325.27	947.554	26.879	1158	5474.61	1158	2072.86	1258.12	-12.0187	1158	21824.9
1159.5	11831.4	948.695	7.13099	1159.5	7269.2	948.695	27.424	1159.5	4185.52	1159.5	1669.23	1259.21	-12.3029	1159.5	18011.6
1161	9345.67	949.836	45.5235	1161	5221.46	949.836	27.8959	1161	2916.41	1161	1112.62	1260.3	-12.6197	1161	13484.3
1162.5	6988.59	950.975	30.7788	1162.5	3428.94	950.975	27.9312	1162.5	1883.21	1162.5	762.861	1261.4	-13.263	1162.5	9396.62
1164	5091.73	952.115	19.3128	1164	2232.15	952.115	27.1963	1164	1293.68	1164	607.729	1262.49	-14.4755	1164	6236.72
1165.5	3417.47	953.255	31.8567	1165.5	1398	953.255	25.7363	1165.5	873.793	1165.5	481.686	1263.58	-16.3901	1165.5	3974.74
1167	2068.77	954.395	25.1006	1167	819.537	954.395	24.2129	1167	491.09	1167	353.343	1264.67	-18.9945	1167	2595.43
1168.5	1298.87	955.533	26.4973	1168.5	719.556	955.533	23.6715	1168.5	334.727	1168.5	285.521	1265.76	-22.1296	1168.5	1881.62
1170	830.395	956.672	9.04267	1170	841.492	956.672	24.8507	1170	278.678	1170	222.639	1266.85	-25.5194	1170	1226.43
1171.5	600.722	957.812	25.4366	1171.5	631.175	957.812	27.5167	1171.5	148.976	1171.5	115.816	1267.94	-28.8264	1171.5	650.568
1173	688.169	958.951	36.4019	1173	253.09	958.951	30.3741	1173	121.593	1173	61.8402	1269.03	-31.722	1173	622.604
1174.5	593.031	960.089	41.3687	1174.5	96.1812	960.089	31.7178	1174.5	249.397	1174.5	129.587	1270.12	-33.9544	1174.5	654.285
1176	191.822	961.227	35.7654	1176	0	961.227	30.4177	1176	203.415	1176	182.617	1271.21	-35.3995	1176	278.955
1177.5	0	962.366	19.3007	1177.5	0	962.366	26.5456	1177.5	0	1177.5	145.372	1272.3	-36.0821	1177.5	0
1179	75.3252	963.503	32.4189	1179	130.37	963.503	21.2248	1179	79.0148	1179	118.902	1273.39	-36.1598	1179	0
1180.5	197.524	964.641	3.09562	1180.5	363.281	964.641	15.8682	1180.5	386.888	1180.5	128.443	1274.48	-35.8738	1180.5	137.444
1182	166.895	965.779	1.63236	1182	373.523	965.779	11.4176	1182	284.869	1182	135.393	1275.57	-35.4764	1182	236.784
1183.5	0	966.916	23.3205	1183.5	245.587	966.916	8.1011	1183.5	35.2306	1183.5	144.368	1276.66	-35.1537	1183.5	198.891
1185	99.2102	968.054	0.0072463	1185	453.657	968.054	5.7606	1185	356.874	1185	257.469	1277.75	-34.9638	1185	246.739
1186.5	629.116	969.191	12.2554	1186.5	813.885	969.191	4.33371	1186.5	657.542	1186.5	331.806	1278.83	-34.8086	1186.5	396.689
1188	893.612	970.327	-1.34505	1188	753.795	970.327	4.00338	1188	331.942	1188	155.101	1279.92	-34.4495	1188	364.986
1189.5	812.953	971.464	-11.7969	1189.5	479.853	971.464	4.91141	1189.5	140.07	1189.5	0	1281.01	-33.5637	1189.5	202.757
1191	745.021	972.601	13.3112	1191	406.05	972.601	6.76574	1191	344.421	1191	33.2247	1282.1	-31.8316	1191	118.757
1192.5	448.406	973.737	17.1408	1192.5	369.376	973.737	8.78094	1192.5	354.735	1192.5	65.7893	1283.19	-29.0291	1192.5	184.639
1194	54.0642	974.874	6.81895	1194	174.272	974.874	10.0913	1194	139.875	1194	65.8654	1284.27	-25.1024	1194	291.508
1195.5	0	976.009	23.0799	1195.5	0	976.009	10.3284	1195.5	0	1195.5	109.328	1285.36	-20.2026	1195.5	156.551
1197	220.633	977.145	-2.23052	1197	81.7048	977.145	9.85738	1197	66.1363	1197	123.13	1286.45	-14.6681	1197	0
1198.5	521.389	978.281	10.879	1198.5	273.451	978.281	9.45211	1198.5	290.428	1198.5	81.349	1287.54	-8.95934	1198.5	165.983
1200	522.608	979.416	0	1200	156.793	979.416	9.63858	1200	481.758	1200	30.9033	1288.62	-3.56109	1200	275.878
1201.5	341.887	980.552	15.8588	1201.5	0	980.552	10.2481	1201.5	361.938	1201.5	0	1289.71	1.11923	1201.5	100.321
1203	204.471	981.686	18.5815	1203	0	981.686	10.5645	1203	0	1203	0	1290.8	4.83124	1203	0
1204.5	65.8831	982.822	13.5803	1204.5	23.2515	982.822	9.95461	1204.5	0	1204.5	24.3734	1291.88	7.51439	1204.5	0
1206	0	983.956	6.16309	1206	12.3289	983.956	8.49451	1206	314.135	1206	70.2307	1292.97	9.2765	1206	0
1207.5	30.824	985.091	-6.39614	1207.5	0	985.091	7.06081	1207.5	299.104	1207.5	113.844	1294.06	10.3268	1207.5	99.4861
1209	270.313	986.224	12.4686	1209	85.9072	986.224	6.8148	1209	241.287	1209	104.72	1295.14	10.8843	1209	271.725
1210.5	607.808	987.359	8.46942	1210.5	271.308	987.359	8.45282	1210.5	472.843	1210.5	43.418	1296.23	11.0937	1210.5	247.387
1212	493.229	988.492	9.4842	1212	248.782	988.492	11.8171	1212	618.694	1212	86.0009	1297.31	10.9782	1212	126.052
1213.5	46.9109	989.627	23.065	1213.5	75.8567	989.627	16.1388	1213.5	517.058	1213.5	201.047	1298.4	10.446	1213.5	230.426
1215	55.5305	990.76	6.49976	1215	183.407	990.76	20.7253	1215	362.984	1215	160.852	1299.48	9.35278	1215	387.728
1216.5	420.977	991.894	27.2225	1216.5	412.978	991.894	25.5146	1216.5	314.667	1216.5	166.183	1300.57	7.6007	1216.5	398.447
1218	583.319	993.026	40.0893	1218	353.027	993.026	31.0663	1218	312.391	1218	405.213	1301.65	5.24169	1218	348.949
1219.5	530.255	994.16	41.8121	1219.5	117.402	994.16	37.9685	1219.5	300.534	1219.5	502.048	1302.74	2.5471	1219.5	324.354
1221	516.698	995.292	33.9689	1221	0	995.292	46.1455	1221	357.055	1221	391.865	1303.82	0.0156889	1221	369.85
1222.5	697.907	996.426	40.9817	1222.5	136.405	996.426	54.6137	1222.5	521.539	1222.5	463.227	1304.91	-1.69544	1222.5	483.12
1224	899.535	997.558	75.5685	1224	354.73	997.558	61.9469	1224	653.632	1224	593.696	1305.99	-1.90344	1224	623.383
1225.5	830.438	998.689	81.1473	1225.5	345.257	998.689	67.131	1225.5	569.157	1225.5	471.57	1307.08	-0.067232	1225.5	706.705
1227	780.934	999.822	74.3021	1227	329.291	999.822	70.2103	1227	494.204	1227	390.114	1308.16	4.05854	1227	739.98
1228.5	882.584	1000.95	69.3269	1228.5	487.78	1000.95	72.2376	1228.5	635.469	1228.5	534.999	1309.24	10.3256	1228.5	790.1
1230	568.825	1002.09	52.3176	1230	514.754	1002.09	74.5285	1230	771.791	1230	601.635	1310.33	18.1853	1230	733.739
1231.5	212.534	1003.22	89.7684	1231.5	379.201	1003.22	77.8083	1231.5	694.034	1231.5	499.366	1311.41	26.781	1231.5	549.865
1233	564.075	1004.35	79.0693	1233	332.952	1004.35	81.8117	1233	521.735	1233	392.851	1312.49	35.1192	1233	615.721
1234.5	1028.95	1005.48	86.3701	1234.5	228.688	1005.48	85.7245	1234.5	534.429	1234.5	433.176	1313.58	42.2803	1234.5	845.025
1236	1063.05	1006.61	100.671	1236	14.7502	1006.61	89.0907	1236	642.869	1236	557.483	1314.66	47.6123	1236	738.696
1237.5	781.067	1007.74	91.2617	1237.5	0	1007.74	92.5096	1237.5	553.66	1237.5	515.514	1315.74	50.8562	1237.5	466.902
1239	353.824	1008.87	92.2725	1239	25.2251	1008.87	97.5472	1239	392.861	1239	376.586	1316.82	52.1719	1239	385.119
1240.5	301.405	1010	89.1533	1240.5	89.5581	1010	105.849	1240.5	572.094	1240.5	429.704	1317.91	52.0585	1240.5	599.551
1242	632.992	1011.13	105.594	1242	222.542	1011.13	118.032	1242	814.79	1242	525.985	1318.99	51.1926	1242	910.953
1243.5	784.847	1012.26	147.465	1243.5	221.452	1012.26	133.12	1243.5	739.73	1243.5	435.915	1320.07	50.2342	1243.5	935.487
1245	1035.33	1013.39	161.626	1245	537.896	1013.39	148.894	1245	817.507	1245	391.208	1321.15	49.6541	1245	893.815
1246.5	1338.65	1014.52	161.507	1246.5	928.218	1014.52	162.933	1246.5	989.807	1246.5	556.058	1322.23	49.6336	1246.5	988.827
1248	935.087	1015.65	172.807	1248	568.187	1015.65	173.629	1248	647.917	1248	744.64	1323.32	50.0616	1248	749.902
1249.5	489.292	1016.78	172.108	1249.5	98.3643	1016.78	180.59	1249.5	243.455	1249.5	667.665	1324.4	50.6254	1249.5	331.794
1251	981.342	1017.91	193.409	1251	350.814	1017.91	184.315	1251	462.969	1251	497.691	1325.48	50.9632	1251	484.045
1252.5	1582.54	1019.04	205	1252.5	749.133	1019.04	185.536	1252.5	869.637	1252.5	594.656	1326.56	50.8269	1252.5	815.193
1254	1474.14	1020.17	172.731	1254	785.54	1020.17	184.746	1254	884.168	1254	718.679	1327.64	50.2004	1254	845.309
1255.5	1191.5	1021.3	180.461	1255.5	791.053	1021.3	182.166	1255.5	739.137	1255.5	647.094	1328.72	49.3338	1255.5	1116.65
1257	1355.32	1022.42	183.782	1257	726.4	1022.42	177.944	1257	873.322	1257	566.302	1329.8	48.679	1257	1550.28
1258.5	1766.96	1023.55	170.083	1258.5	546.592	1023.55	172.255	1258.5	1146.26	1258.5	564.025	1330.88	48.7448	1258.5	1409.76
1260	1957.5	1024.68	166.524	1260	674.86	1024.68	165.199	1260	1147.65	1260	623.254	1331.96	49.9163	1260	1025.57
1261.5	1741.47	1025.81	159.405	1261.5	755.786	1025.81	156.624	1261.5	809.411	1261.5	684.242	1333.04	52.2948	1261.5	945.595
1263	1335.16	1026.94	153.986	1263	462.438	1026.94	146.249	1263	435.766	1263	720.462	1334.12	55.6136	1263	1090.34
1264.5	1216.9	1028.06	138.026	1264.5	370.876	1028.06	134.129	1264.5	590.439	1264.5	790.545	1335.2	59.2597	1264.5	1323.95
1266	1483.42	1029.19	102.047	1266	622.935	1029.19	121.134	1266	1084.34	1266	867.74	1336.28	62.4042	1266	1541.7
1267.5	2027.33	1030.32	120.628	1267.5	927.597	1030.32	109.04	1267.5	1139.18	1267.5	868.742	1337.36	64.208	1267.5	1566.52
1269	2479.83	1031.44	99.669	1269	1277.87	1031.44	99.9638	1269	1115.61	1269	833.478	1338.44	64.0482	1269	1345.33
1270.5	2150.07	1032.57	76.6798	1270.5	1408.54	1032.57	95.4529	1270.5	1293.66	1270.5	754.62	1339.52	61.6998	1270.5	1186.98
1272	1318.32	1033.7	97.5606	1272	1009.81	1033.7	95.8537	1272	1103.1	1272	614.231	1340.59	57.4197	1272	1102.79
1273.5	727.343	1034.82	96.3115	1273.5	492.274	1034.82	100.296	1273.5	625.205	1273.5	497.606	1341.67	51.9054	1273.5	827.944
1275	439.844	1035.95	110.322	1275	312.532	1035.95	107.256	1275	208.606	1275	355.149	1342.75	46.1375	1275	542.961
1276.5	604.537	1037.08	108.483	1276.5	523.259	1037.08	115.252	1276.5	156.355	1276.5	273.154	1343.83	41.1445	1276.5	460.218
1278	1080.91	1038.2	123.804	1278	827.877	1038.2	123.143	1278	470.937	1278	348.526	1344.91	37.7539	1278	449.011
1279.5	1200.3	1039.33	146.535	1279.5	774.367	1039.33	129.988	1279.5	665.221	1279.5	467.551	1345.99	36.3955	1279.5	376.343
1281	877.178	1040.45	134.576	1281	444.952	1040.45	134.872	1281	556.511	1281	496.976	1347.06	37.0085	1281	183.904
1282.5	339.209	1041.58	125.017	1282.5	173.642	1041.58	136.979	1282.5	174.481	1282.5	260.535	1348.14	39.0762	1282.5	0
1284	0	1042.7	141.337	1284	0	1042.7	136.096	1284	0	1284	0	1349.22	41.7759	1284	0
1285.5	215.286	1043.83	136.788	1285.5	0	1043.83	133.038	1285.5	386.443	1285.5	90.3925	1350.29	44.2001	1285.5	187.71
1287	671.943	1044.95	146.399	1287	286.273	1044.95	129.662	1287	604.095	1287	332.848	1351.37	45.5881	1287	339.766
1288.5	456.363	1046.08	116.7	1288.5	295.351	1046.08	128.175	1288.5	210.962	1288.5	344.354	1352.45	45.5081	1288.5	0
1290	300.755	1047.2	111.301	1290	174.456	1047.2	130.197	1290	316.135	1290	258.285	1353.53	43.94	1290	0
1291.5	791.536	1048.33	126.752	1291.5	403.421	1048.33	136.014	1291.5	819.072	1291.5	321.75	1354.6	41.247	1291.5	766.194
1293	1067.53	1049.45	152.933	1293	530.907	1049.45	144.543	1293	746.364	1293	409.983	1355.68	38.047	1293	849.115
1294.5	944.878	1050.57	161.393	1294.5	387.995	1050.57	153.835	1294.5	568.16	1294.5	375.251	1356.75	35.0293	1294.5	335.289
1296	979.628	1051.7	170.264	1296	387.547	1051.7	161.858	1296	721.603	1296	363.529	1357.83	32.7679	1296	401.386
1297.5	924.282	1052.82	165.595	1297.5	420.547	1052.82	167.114	1297.5	668.885	1297.5	455.703	1358.9	31.5863	1297.5	640.671
1299	493.404	1053.94	161.346	1299	160.77	1053.94	168.857	1299	344.732	1299	540.462	1359.98	31.5056	1299	607.568
1300.5	345.442	1055.07	179.357	1300.5	0	1055.07	167.04	1300.5	283.886	1300.5	613.18	1361.06	32.2847	1300.5	639.851
1302	799.721	1056.19	165.678	1302	300.453	1056.19	162.053	1302	499.28	1302	519.244	1362.13	33.5316	1302	686.292
1303.5	1042.07	1057.31	149.859	1303.5	503.036	1057.31	154.353	1303.5	538.579	1303.5	243.967	1363.21	34.8468	1303.5	505.117
1305	981.754	1058.43	145.61	1305	438.974	1058.43	144.17	1305	541.84	1305	271.794	1364.28	35.9521	1305	482.67
1306.5	1151.41	1059.56	150.63	1306.5	687.455	1059.56	131.391	1306.5	681.097	1306.5	531.981	1365.36	36.7633	1306.5	726.936
1308	1346.01	1060.68	109.811	1308	1096.32	1060.68	115.839	1308	793.497	1308	669.088	1366.43	37.3889	1308	703.809
1309.5	1138.05	1061.8	91.7021	1309.5	855.974	1061.8	97.7891	1309.5	942.541	1309.5	693.047	1367.5	38.0579	1309.5	650.981
1311	822.957	1062.92	71.023	1311	308.589	1062.92	78.5039	1311	1024.6	1311	655.009	1368.58	39.0031	1311	993.392
1312.5	976.206	1064.04	74.9139	1312.5	330.629	1064.04	60.2355	1312.5	877.95	1312.5	584.352	1369.65	40.3422	1312.5	917.307
1314	1234.71	1065.17	55.9347	1314	467.664	1065.17	45.5328	1314	747.332	1314	538.841	1370.73	41.9958	1314	391.549
1315.5	1249.37	1066.29	-1.74437	1315.5	395.605	1066.29	36.1606	1315.5	789.768	1315.5	593.398	1371.8	43.6739	1315.5	669.151
1317	733.914	1067.41	19.7165	1317	247.684	1067.41	32.2352	1317	646.035	1317	723.235	1372.87	44.9376	1317	1124.61
1318.5	0	1068.53	52.1874	1318.5	0	1068.53	32.2251	1318.5	355.313	1318.5	751.82	1373.95	45.3205	1318.5	712.328
1320	388.252	1069.65	37.0783	1320	177.021	1069.65	33.7821	1320	652.595	1320	712.607	1375.02	44.4755	1320	452.793
1321.5	1621.61	1070.77	26.3992	1321.5	785.474	1070.77	34.8803	1321.5	1218.68	1321.5	827.701	1376.09	42.3007	1321.5	709.793
1323	1954.95	1071.89	42.8701	1323	844.934	1071.89	34.5568	1323	1161.96	1323	877.666	1377.17	39.0056	1323	677.634
1324.5	1264.45	1073.01	37.761	1324.5	353.795	1073.01	32.9195	1324.5	905.999	1324.5	660.1	1378.24	35.0931	1324.5	300.663
1326	512.891	1074.13	14.2219	1326	0	1074.13	30.6358	1326	667.406	1326	465.459	1379.31	31.2552	1326	0
1327.5	131.114	1075.25	51.4028	1327.5	0	1075.25	28.3854	1327.5	192.897	1327.5	522.553	1380.38	28.2082	1327.5	383.546
1329	245.68	1076.37	4.72367	1329	196.492	1076.37	26.5918	1329	1.56189	1329	534.283	1381.45	26.508	1329	1178.83
1330.5	557.681	1077.49	24.9046	1330.5	380.595	1077.49	25.3785	1330.5	203.978	1330.5	375.726	1382.53	26.3959	1330.5	1314.85
1332	1082.34	1078.61	29.6555	1332	796.143	1078.61	24.5446	1332	707.207	1332	516.919	1383.6	27.7182	1332	885.055
1333.5	1553.08	1079.73	36.9763	1333.5	1079	1079.73	23.5234	1333.5	1007.06	1333.5	825.416	1384.67	29.942	1333.5	408.52
1335	1350.91	1080.85	14.0172	1335	692.856	1080.85	21.5252	1335	588.488	1335	832.206	1385.74	32.2703	1335	299.478
1336.5	780.473	1081.96	20.3582	1336.5	350.231	1081.96	18.0091	1336.5	200.887	1336.5	690.71	1386.81	33.8255	1336.5	571.768
1338	401.79	1083.08	8.53911	1338	395.644	1083.08	13.2341	1338	223.885	1338	612.694	1387.88	33.8599	1338	881.978
1339.5	195.074	1084.2	0	1339.5	260.322	1084.2	8.42908	1339.5	160.543	1339.5	527.013	1388.96	31.9382	1339.5	730.088
1341	331.629	1085.32	20.2325	1341	0	1085.32	5.17415	1341	0	1341	395.233	1390.03	28.0484	1341	178.174
1342.5	987.772	1086.44	2.88496	1342.5	23.6276	1086.44	4.37114	1342.5	46.5399	1342.5	326.007	1391.1	22.6125	1342.5	243.609
1344	1060.58	1087.55	-11.0193	1344	389.465	1087.55	5.61835	1344	150.105	1344	364.318	1392.17	16.3996	1344	556.391
1345.5	349.316	1088.67	14.4932	1345.5	471.006	1088.67	7.62097	1345.5	73.3077	1345.5	397.379	1393.24	10.3618	1345.5	188.534
1347	0	1089.79	14.5757	1347	23.5427	1089.79	9.47867	1347	0	1347	394.608	1394.31	5.43991	1347	0
1348.5	169.514	1090.91	-0.191835	1348.5	0	1090.91	11.723	1348.5	33.096	1348.5	467.512	1395.38	2.38673	1348.5	305.064
1350	939.986	1092.02	17.0439	1350	730.898	1092.02	16.1693	1350	245.175	1350	654.508	1396.45	1.65174	1350	555.596
1351.5	1438.32	1093.14	30.7064	1351.5	999.034	1093.14	24.5524	1351.5	315.862	1351.5	623.124	1397.52	3.35133	1351.5	454.074
1353	951.435	1094.26	28.3589	1353	480.179	1094.26	37.1689	1353	68.99	1353	347.92	1398.58	7.32463	1353	132.114
1354.5	248.224	1095.37	48.5947	1354.5	226.614	1095.37	52.7749	1354.5	46.2216	1354.5	294.144	1399.65	13.2504	1354.5	196.57
1356	211.264	1096.49	58.6771	1356	554.473	1096.49	69.9869	1356	146.118	1356	343.687	1400.72	20.7863	1356	618.901
1357.5	633.96	1097.61	86.6196	1357.5	917.45	1097.61	88.981	1357.5	131.819	1357.5	297.762	1401.79	29.6856	1357.5	673.153
1359	572.858	1098.72	126.145	1359	473.59	1098.72	111.765	1359	78.289	1359	273.082	1402.86	39.8572	1359	434.037
1360.5	0	1099.84	126.658	1360.5	0	1099.84	140.629	1360.5	0	1360.5	146.351	1403.93	51.354	1360.5	312.064
1362	171.609	1100.95	171.334	1362	710.004	1100.95	176.26	1362	285.249	1362	0	1405	64.2987	1362	634.818
1363.5	1339.06	1102.07	223.846	1363.5	1769.5	1102.07	217.601	1363.5	735.962	1363.5	212.886	1406.07	78.775	1363.5	1129.51
1365	2031	1103.18	232.942	1365	1822.34	1103.18	264.436	1365	738.764	1365	548.862	1407.13	94.7267	1365	1259.25
1366.5	1944.97	1104.3	292.454	1366.5	1377.77	1104.3	320.917	1366.5	849.386	1366.5	606.6	1408.2	111.901	1366.5	1777.49
1368	2250.03	1105.41	396.12	1368	1416.9	1105.41	397.077	1368	1191.57	1368	625.118	1409.27	129.863	1368	2950.4
1369.5	3065.64	1106.53	493.343	1369.5	1951.28	1106.53	506.312	1369.5	1340.41	1369.5	753.467	1410.34	148.082	1369.5	3539.53
1371	3466.52	1107.64	619.448	1371	2226.61	1107.64	660.249	1371	1313.95	1371	781.056	1411.4	166.066	1371	3478.64
1372.5	3388.01	1108.76	783.671	1372.5	2023.42	1108.76	864.517	1372.5	1148.14	1372.5	705.506	1412.47	183.508	1372.5	3373.58
1374	3593.89	1109.87	1006.06	1374	1770.39	1109.87	1118.51	1374	1021.3	1374	792.514	1413.54	200.401	1374	2999.71
1375.5	3839.79	1110.98	1345.86	1375.5	1654.79	1110.98	1418.26	1375.5	911.127	1375.5	927.758	1414.6	217.073	1375.5	2444.29
1377	3638.55	1112.1	1817.37	1377	1490.7	1112.1	1758.13	1377	735.062	1377	941.993	1415.67	234.15	1377	2365.53
1378.5	3246.57	1113.21	2231.19	1378.5	1178.58	1113.21	2127.31	1378.5	786.115	1378.5	1024.86	1416.74	252.43	1378.5	2477.65
1380	2985.08	1114.32	2495.15	1380	967.694	1114.32	2501.34	1380	933.843	1380	1064.18	1417.8	272.729	1380	2319.23
1381.5	3034.19	1115.44	2708.37	1381.5	1087.57	1115.44	2835.29	1381.5	944.69	1381.5	828.612	1418.87	295.73	1381.5	2280
1383	3295.94	1116.55	3119.61	1383	1267.94	1116.55	3067.16	1383	1105.4	1383	694.569	1419.94	321.882	1383	2292.97
1384.5	3159.86	1117.66	3523.14	1384.5	1162.16	1117.66	3134.93	1384.5	1211.91	1384.5	735.372	1421	351.395	1384.5	1833.46
1386	2281.18	1118.78	3440.93	1386	896.738	1118.78	3002.03	1386	908.021	1386	597.237	1422.07	384.301	1386	1214.52
1387.5	1523.2	1119.89	2861.46	1387.5	915.786	1119.89	2677.86	1387.5	662.241	1387.5	537.556	1423.13	420.584	1387.5	941.564
1389	1499.68	1121	2126.98	1389	1291.41	1121	2220.6	1389	845.448	1389	810.594	1424.2	460.307	1389	1222.77
1390.5	1672.27	1122.11	1513.08	1390.5	1368.34	1122.11	1718.41	1390.5	1148.56	1390.5	870.106	1425.26	503.686	1390.5	1438.62
1392	1424.13	1123.22	1110.61	1392	996.817	1123.22	1257.61	1392	1100.86	1392	592.034	1426.33	551.07	1392	793.188
1393.5	1033.97	1124.34	829.978	1393.5	871.919	1124.34	893.786	1393.5	765.567	1393.5	548.053	1427.39	602.815	1393.5	129.212
1395	580.646	1125.45	614.794	1395	571.083	1125.45	639.957	1395	415.094	1395	586.845	1428.46	659.075	1395	30.1007
1396.5	0	1126.56	446.32	1396.5	0	1126.56	475.2	1396.5	63.2749	1396.5	371.435	1429.52	719.588	1396.5	146.78
1398	430.438	1127.67	322.846	1398	634.102	1127.67	365.631	1398	161.732	1398	220.292	1430.59	783.532	1398	365.151
1399.5	1661.84	1128.78	245.941	1399.5	2050.3	1128.78	284.196	1399.5	875.577	1399.5	398.013	1431.65	849.547	1399.5	588.785
1401	1474.62	1129.89	197.177	1401	1791.15	1129.89	219.239	1401	1162.89	1401	580.704	1432.71	915.987	1401	357.552
1402.5	338.219	1131	176.843	1402.5	540.132	1131	170.787	1402.5	544.581	1402.5	390.698	1433.78	981.4	1402.5	0
1404	0	1132.11	137.949	1404	212.047	1132.11	141.168	1404	0	1404	93.2555	1434.84	1045.19	1404	275.79
1405.5	117.313	1133.22	112.754	1405.5	1117.87	1133.22	128.257	1405.5	0	1405.5	0	1435.9	1108.37	1405.5	565.03
1407	395.817	1134.33	132.42	1407	1922.77	1134.33	125.356	1407	138.514	1407	100.215	1436.97	1174.15	1407	229.237
1408.5	699.819	1135.44	87.946	1408.5	1851.2	1135.44	125.703	1408.5	125.023	1408.5	284.966	1438.03	1248.37	1408.5	0
1410	854.092	1136.55	141.762	1410	2188.33	1136.55	126.576	1410	82.8752	1410	236.315	1439.09	1339.4	1410	134.928
1411.5	1188.85	1137.66	130.428	1411.5	3365.75	1137.66	129.473	1411.5	273.113	1411.5	150.64	1440.16	1457.59	1411.5	458.158
1413	1176.38	1138.77	157.673	1413	4245.78	1138.77	136.895	1413	266.147	1413	301.793	1441.22	1614.18	1413	684.435
1414.5	932.339	1139.88	125.769	1414.5	4759.42	1139.88	149.144	1414.5	98.4957	1414.5	377.552	1442.28	1819.77	1414.5	875.139
1416	1594.73	1140.99	153.575	1416	5935.73	1140.99	164.18	1416	431.485	1416	372.175	1443.34	2082.47	1416	1450.53
1417.5	2841.45	1142.1	173.391	1417.5	8016.32	1142.1	180.669	1417.5	1024.46	1417.5	447.836	1444.41	2406.04	1417.5	1835.38
1419	3620.98	1143.21	211.486	1419	10261.2	1143.21	201.52	1419	1445.81	1419	550.51	1445.47	2788.35	1419	1555.04
1420.5	3806.76	1144.32	219.302	1420.5	12387.4	1144.32	234.701	1420.5	1734.34	1420.5	688.921	1446.53	3220.28	1420.5	1579.49
1422	4166.21	1145.43	264.968	1422	14894.7	1145.43	290.074	1422	1877.64	1422	774.823	1447.59	3685.4	1422	2158.35
1423.5	5089.26	1146.53	345.217	1423.5	18073.2	1146.53	373.811	1423.5	2092.57	1423.5	833.085	1448.65	4160.63	1423.5	2744.35
1425	6179.18	1147.64	422.603	1425	21659.2	1147.64	483.531	1425	2568.22	1425	976.486	1449.71	4617.74	1425	3064.9
1426.5	7119.15	1148.75	589.988	1426.5	25294.4	1148.75	606.92	1426.5	3094.87	1426.5	1224.71	1450.77	5025.79	1426.5	3097.27
1428	8316.25	1149.86	770.514	1428	29246.6	1149.86	724.5	1428	3681.9	1428	1535.22	1451.84	5354.06	1428	3097.65
1429.5	10301	1150.96	905.763	1429.5	34131	1150.96	815.292	1429.5	4342.63	1429.5	1558.97	1452.9	5575.39	1429.5	3578.81
1431	12212.5	1152.07	928.719	1431	39213	1152.07	862.916	1431	4786.59	1431	1397.93	1453.96	5669.24	1431	4688.45
1432.5	13328.1	1153.18	891.815	1432.5	43644.3	1153.18	859.927	1432.5	4990.7	1432.5	1529.3	1455.02	5624.27	1432.5	5046.7
1434	14911.4	1154.29	815.201	1434	48128.9	1154.29	809.034	1434	5559.06	1434	1665.95	1456.08	5439.92	1434	4868.77
1435.5	17563.1	1155.39	747.03	1435.5	53153.3	1155.39	721.24	1435.5	6674.26	1435.5	1716.31	1457.14	5126.79	1435.5	6034.25
1437	19881.2	1156.5	644.695	1437	57920.1	1156.5	611.891	1437	7456.52	1437	1935.24	1458.2	4705.74	1437	7812.53
1438.5	21921.8	1157.6	479.664	1438.5	61830.8	1157.6	496.315	1438.5	8181.56	1438.5	2210.59	1459.26	4205.66	1438.5	9386.19
1440	24833.3	1158.71	352.47	1440	65373.3	1158.71	386.497	1440	9764.6	1440	2555.87	1460.32	3660.36	1440	11792.2
1441.5	28337.2	1159.82	285.566	1441.5	69364.5	1159.82	289.759	1441.5	11961.5	1441.5	3156.55	1461.38	3104.86	1441.5	15194.6
1443	32692.4	1160.92	185.395	1443	74238.1	1160.92	209.228	1443	14916	1443	3978.37	1462.44	2571.66	1443	19318.9
1444.5	39080.9	1162.03	128.781	1444.5	80830.3	1162.03	145.208	1444.5	19426.2	1444.5	5034.56	1463.49	2087.51	1444.5	25190.2
1446	46834.4	1163.13	88.0297	1446	90486.7	1163.13	96.4885	1446	25215.1	1446	6681.84	1464.55	1671.15	1446	33346.6
1447.5	55424	1164.24	54.2755	1447.5	103770	1164.24	60.9541	1447.5	31917.6	1447.5	8903.79	1465.61	1332.18	1447.5	43347.6
1449	66389.1	1165.34	27.2345	1449	120947	1165.34	35.8393	1449	40259.9	1449	11332.3	1466.67	1071.34	1449	55030.7
1450.5	78118.3	1166.45	17.4803	1450.5	140371	1166.45	18.0036	1450.5	49601.2	1450.5	14195.4	1467.73	881.907	1450.5	67592.9
1452	86990	1167.55	4.01934	1452	157590	1167.55	4.62853	1452	57293.7	1452	17204.6	1468.79	751.851	1452	78496.5
1453.5	94664.2	1168.66	-12.8849	1453.5	168188	1168.66	-6.07373	1453.5	61461.1	1453.5	19152.9	1469.84	666.516	1453.5	86653.5
1455	105071	1169.76	-29.9159	1455	171880	1169.76	-14.5649	1455	62335.5	1455	19765.8	1470.9	611.127	1455	92319
1456.5	120153	1170.87	6.31991	1456.5	169684	1170.87	-20.5124	1456.5	60305.2	1456.5	19329.2	1471.96	572.859	1456.5	95621.1
1458	137384	1171.97	-40.851	1458	159954	1171.97	-23.7071	1458	55126.3	1458	17989.9	1473.02	542.134	1458	97020
1459.5	153964	1173.07	-16.312	1459.5	143411	1173.07	-24.7917	1459.5	47375.8	1459.5	15873.1	1474.07	513.077	1459.5	97253.6
1461	167798	1174.18	-44.2162	1461	124707	1174.18	-25.178	1461	38648.1	1461	13014.6	1475.13	483.197	1461	94914.1
1462.5	175625	1175.28	-31.9672	1462.5	106075	1175.28	-26.2819	1462.5	29819.8	1462.5	9864.81	1476.19	452.524	1462.5	88804
1464	174618	1176.38	4.86185	1464	89040.5	1176.38	-28.7388	1464	21815.8	1464	7150.22	1477.25	422.485	1464	80883
1465.5	163344	1177.49	-31.7524	1465.5	75836.6	1177.49	-32.1644	1465.5	15786.4	1465.5	5034.38	1478.3	394.824	1465.5	71361.7
1467	142198	1178.59	-51.0733	1467	65968.8	1178.59	-35.6356	1467	11675.4	1467	3452.06	1479.36	370.794	1467	59110.5
1468.5	114670	1179.69	-52.1043	1468.5	57587.5	1179.69	-38.4822	1468.5	8995.37	1468.5	2484.71	1480.42	350.744	1468.5	45904.3
1470	86514.9	1180.8	-25.0085	1470	50864.2	1180.8	-40.6887	1470	7185.34	1470	1887.5	1481.47	334.102	1470	33488.4
1471.5	61518.4	1181.9	-54.1795	1471.5	45336.3	1181.9	-42.6559	1471.5	5623.1	1471.5	1324.46	1482.53	319.662	1471.5	22318.1
1473	40859	1183	-24.2205	1473	39797.3	1183	-44.6272	1473	4516.1	1473	1017.17	1483.58	306.025	1473	13355.4
1474.5	25672	1184.1	-58.3914	1474.5	34616.5	1184.1	-46.2659	1474.5	3724.98	1474.5	881.141	1484.64	292.018	1474.5	7483.88
1476	16510.4	1185.2	-44.2824	1476	30681.3	1185.2	-46.8224	1476	3048.23	1476	683.198	1485.69	276.972	1476	4479.36
1477.5	11482.2	1186.31	-59.1866	1477.5	27440	1186.31	-45.7583	1477.5	2403.5	1477.5	518.407	1486.75	260.802	1477.5	3190.43
1479	8298.98	1187.41	-36.3576	1479	24515.7	1187.41	-43.3084	1479	1795.83	1479	410.606	1487.8	243.893	1479	2132.94
1480.5	5785.06	1188.51	-48.8185	1480.5	22424.9	1188.51	-40.5588	1480.5	1646.42	1480.5	404.018	1488.86	226.864	1480.5	1452.17
1482	4227.13	1189.61	-23.7095	1482	21359	1189.61	-38.8617	1482	1697.32	1482	390.274	1489.91	210.307	1482	1357.91
1483.5	3452.43	1190.71	-33.3104	1483.5	20896.3	1190.71	-39.0044	1483.5	1554.42	1483.5	281.305	1490.97	194.592	1483.5	1409.09
1485	2403.59	1191.81	-50.7714	1485	20240.7	1191.81	-40.6547	1485	1224.83	1485	290.128	1492.02	179.789	1485	1202.84
1486.5	1201.09	1192.91	-40.9523	1486.5	19717.8	1192.91	-42.458	1486.5	882.819	1486.5	346.272	1493.08	165.725	1486.5	614.741
1488	664.737	1194.01	-41.5533	1488	20157.7	1194.01	-42.7491	1488	833.996	1488	304.8	1494.13	152.138	1488	112.054
1489.5	553.426	1195.11	-49.1543	1489.5	21272.6	1195.11	-40.4765	1489.5	880.705	1489.5	247.009	1495.19	138.847	1489.5	55.2257
1491	522.758	1196.21	-42.6152	1491	22625	1196.21	-35.812	1491	849.142	1491	229.978	1496.24	125.895	1491	464.959
1492.5	398.173	1197.31	-26.6462	1492.5	23982.1	1197.31	-30.1017	1492.5	752.115	1492.5	239.111	1497.29	113.591	1492.5	628.808
1494	157.186	1198.41	-17.3971	1494	25680.8	1198.41	-25.1764	1494	814.991	1494	157.811	1498.35	102.446	1494	271.155
1495.5	92.2136	1199.51	-12.7181	1495.5	28153.9	1199.51	-22.3926	1495.5	1195.35	1495.5	40.9847	1499.4	93.0153	1495.5	14.058
1497	62.4307	1200.61	-24.889	1497	31093.4	1200.61	-21.9313	1497	1394.92	1497	88.9421	1500.45	85.7057	1497	7.96069
1498.5	0	1201.71	-28.78	1498.5	33939.8	1201.71	-22.7458	1498.5	1483.16	1498.5	211.091	1501.51	80.6107	1498.5	103.496
1500	56.6883	1202.81	-27.531	1500	36481.5	1202.81	-23.1855	1500	1810.72	1500	269.593	1502.56	77.4215	1500	109.812
1501.5	21.0426	1203.91	-16.9919	1501.5	38935.5	1203.91	-21.9332	1501.5	2029.91	1501.5	334.606	1503.61	75.4511	1501.5	101.886
1503	0	1205.01	-21.0229	1503	41374.1	1205.01	-18.7083	1503	2117.82	1503	395.345	1504.66	73.7655	1503	258.881
1504.5	223.969	1206.1	-26.3205	1504.5	43643	1206.1	-14.3411	1504.5	2344.58	1504.5	339.527	1505.72	71.3885	1504.5	235.151
1506	288.965	1207.2	8.10436	1506	45489.8	1207.2	-10.246	1506	2695.07	1506	278.217	1506.77	67.5251	1506	0
1507.5	229.482	1208.3	-10.1807	1507.5	47058.4	1208.3	-7.61464	1507.5	3100.12	1507.5	355.095	1507.82	61.7428	1507.5	9.40399
1509	369.69	1209.4	0.244176	1509	48551.2	1209.4	-6.89484	1509	3214.66	1509	444.415	1508.87	54.0669	1509	295.768
1510.5	605.702	1210.5	-24.7509	1510.5	49465.1	1210.5	-7.7517	1510.5	3205.46	1510.5	514.764	1509.92	44.9671	1510.5	538.266
1512	728.108	1211.59	0.97567	1512	49504.4	1211.59	-9.42106	1512	3284.48	1512	614.886	1510.97	35.2411	1512	418.196
1513.5	676.781	1212.69	-15.1694	1513.5	49502.5	1212.69	-11.14	1513.5	3168.36	1513.5	730.834	1512.03	25.8306	1513.5	101.601
1515	569.57	1213.79	12.6955	1515	49860.7	1213.79	-12.3265	1515	3170.7	1515	742.034	1513.08	17.6155	1515	0
1516.5	279.092	1214.89	-44.0196	1516.5	50252.3	1214.89	-12.5844	1516.5	3550.58	1516.5	430.841	1514.13	11.2364	1516.5	26.9056
1518	207.987	1215.98	-16.153	1518	50670	1215.98	-11.6604	1518	3608.32	1518	247.86	1515.18	6.98416	1518	116.263
1519.5	559.149	1217.08	-0.578118	1519.5	51337	1217.08	-9.55466	1519.5	3408.85	1519.5	478.285	1516.23	4.77548	1519.5	210.875
1521	543.709	1218.18	1.27679	1521	52098.3	1218.18	-6.64555	1521	3636.58	1521	625.624	1517.28	4.21069	1521	218.161
1522.5	190.471	1219.27	-8.28662	1522.5	52447.3	1219.27	-3.67603	1522.5	3928.99	1522.5	573.944	1518.33	4.69239	1522.5	199.085
1524	130.033	1220.37	2.57828	1524	52480.7	1220.37	-1.42098	1524	4002.43	1524	499.676	1519.38	5.57074	1524	489.722
1525.5	678.725	1221.46	-7.26513	1525.5	53123.7	1221.46	-0.151109	1525.5	4136.67	1525.5	464.194	1520.43	6.28012	1525.5	857.639
1527	1170.35	1222.56	-3.55022	1527	53974.3	1222.56	0.615982	1527	4388.61	1527	501.186	1521.48	6.43795	1527	888.492
1528.5	665.043	1223.66	18.5847	1528.5	53862.2	1223.66	1.8908	1528.5	4503.67	1528.5	579.041	1522.53	5.88915	1528.5	814.477
1530	42.6609	1224.75	-9.39873	1530	52687	1224.75	4.48957	1530	4301.39	1530	628.084	1523.58	4.69394	1530	763.613
1531.5	0	1225.85	11.1762	1531.5	51007.9	1225.85	8.33393	1531.5	4037.63	1531.5	623.146	1524.63	3.06965	1531.5	659.528
1533	203.246	1226.94	3.90276	1533	49311.7	1226.94	12.3557	1533	4017.87	1533	512.145	1525.68	1.30563	1533	595.656
1534.5	264.636	1228.04	30.3277	1534.5	46871.8	1228.04	15.0732	1534.5	3894.34	1534.5	435.294	1526.73	-0.326472	1534.5	603.185
1536	36.7107	1229.13	9.05426	1536	43283.4	1229.13	15.583	1536	3454.02	1536	479.407	1527.78	-1.64684	1536	542.958
1537.5	34.2288	1230.23	18.9092	1537.5	39432.7	1230.23	14.1572	1537.5	3148.78	1537.5	507.854	1528.82	-2.61167	1537.5	469.47
1539	403.859	1231.32	24.2158	1539	35905.9	1231.32	12.1107	1539	3004.83	1539	493.513	1529.87	-3.32139	1539	513.842
1540.5	898.729	1232.41	-0.207659	1540.5	32783.2	1232.41	10.9147	1540.5	2773.38	1540.5	466.652	1530.92	-3.99295	1540.5	698.27
1542	1115.12	1233.51	-9.20275	1542	29610.2	1233.51	11.2675	1542	2328.02	1542	437.962	1531.97	-4.90622	1542	665.317
1543.5	772.638	1234.6	26.0938	1543.5	25962.6	1234.6	12.7244	1543.5	1674.58	1543.5	279.07	1533.02	-6.33541	1543.5	105.597
1545	822.555	1235.7	20.9487	1545	22460.7	1235.7	14.0613	1545	1504.36	1545	75.3795	1534.06	-8.48027	1545	88.0613
1546.5	1437.93	1236.79	17.9653	1546.5	19856.9	1236.79	14.123	1546.5	1669.63	1546.5	105.701	1535.11	-11.4111	1546.5	637.852
1548	1319.87	1237.88	-1.30808	1548	17448.4	1237.88	12.4409	1548	1420.96	1548	198.831	1536.16	-15.0364	1548	352.361
1549.5	368.2	1238.98	33.4068	1549.5	14658.9	1238.98	9.34531	1549.5	1084.89	1549.5	138.423	1537.21	-19.1023	1549.5	0
1551	0	1240.07	-8.29659	1551	12140.9	1240.07	5.62094	1551	866.517	1551	88.4712	1538.25	-23.2216	1551	339.984
1552.5	548.996	1241.16	0	1552.5	10353	1241.16	2.05564	1552.5	670.094	1552.5	140.752	1539.3	-26.9311	1552.5	593.581
1554	1025.27	1242.25	-9.9571	1554	9205.88	1242.25	-0.735357	1554	662.385	1554	124.409	1540.35	-29.765	1554	478.166
1555.5	967.286	1243.35	6.79179	1555.5	8033.05	1243.35	-2.29732	1555.5	548.077	1555.5	61.9146	1541.39	-31.3349	1555.5	255.939
1557	766.471	1244.44	5.69469	1557	6477.24	1244.44	-2.33102	1557	143.127	1557	139.399	1542.44	-31.4023	1557	380.131
1558.5	863.597	1245.53	-16.6924	1558.5	5464.83	1245.53	-0.898139	1558.5	0	1558.5	157.46	1543.49	-29.9284	1558.5	629.476
1560	1207.72	1246.62	4.92049	1560	5207.23	1246.62	1.41323	1560	181.708	1560	115.577	1544.53	-27.0957	1560	345.858
1561.5	1263.17	1247.71	7.5434	1561.5	4997.52	1247.71	3.62465	1561.5	207.136	1561.5	271.18	1545.58	-23.2942	1561.5	0
1563	930.334	1248.81	-1.14771	1563	4427.84	1248.81	4.91929	1563	42.9527	1563	292.348	1546.62	-19.0719	1563	0
1564.5	630.027	1249.9	4.18519	1564.5	3658.26	1249.9	5.27286	1564.5	0	1564.5	47.1971	1547.67	-15.0595	1564.5	231.026
1566	695.008	1250.99	24.6581	1566	3116.92	1250.99	5.5185	1566	239.231	1566	0	1548.72	-11.8761	1566	397.58
1567.5	971.11	1252.08	-6.29901	1567.5	3284.14	1252.08	6.66546	1567.5	321.502	1567.5	125.679	1549.76	-10.0337	1567.5	326.604
1569	1044.57	1253.17	1.74389	1569	4181.82	1253.17	8.85624	1569	0	1569	176.449	1550.81	-9.85302	1569	240.765
1570.5	738.303	1254.26	17.2168	1570.5	5057.8	1254.26	10.9232	1570.5	18.7083	1570.5	143.32	1551.85	-11.404	1570.5	170.987
1572	395.922	1255.35	10.6897	1572	5485.26	1255.35	11.2036	1572	249.379	1572	98.8386	1552.9	-14.4842	1572	46.4507
1573.5	376.449	1256.44	11.7326	1573.5	5520.97	1256.44	9.27931	1573.5	14.3259	1573.5	85.5724	1553.94	-18.6354	1573.5	5.3942
1575	412.884	1257.53	9.06549	1575	6075.13	1257.53	7.32637	1575	0	1575	53.0215	1554.99	-23.2031	1575	38.9769
1576.5	375.655	1258.62	-2.0316	1576.5	7116.69	1258.62	9.67791	1576.5	285.045	1576.5	21.1902	1556.03	-27.4264	1576.5	0
1578	764.428	1259.71	37.1513	1578	8095.17	1259.71	20.3293	1578	552.713	1578	215.743	1557.07	-30.5504	1578	0
1579.5	997.307	1260.8	31.3442	1579.5	9338.67	1260.8	39.7451	1579.5	766.19	1579.5	419.012	1558.12	-31.9426	1579.5	57.8493
1581	201.884	1261.89	0.677099	1581	10367.5	1261.89	63.2207	1581	514.17	1581	255.307	1559.16	-31.1944	1581	24.9984
1582.5	0	1262.98	0	1582.5	11057	1262.98	82.3454	1582.5	294.509	1582.5	127.121	1560.2	-28.1948	1582.5	180.858
1584	728.07	1264.07	377.376	1584	12193.1	1264.07	89.1141	1584	710.979	1584	282.327	1561.25	-23.1591	1584	578.38
1585.5	693.61	1264.26	0	1585.5	13264.1	1264.26	80.6701	1585.5	1003.68	1585.5	305.886	1562.29	-16.6094	1585.5	401.955
1587	301.987	1265.35	14.5816	1587	13962.2	1265.35	59.6886	1587	831.299	1587	88.4902	1563.03	-9.30393	1587	38.704
1588.5	367.211	1266.45	15.4088	1588.5	15071.8	1266.45	34.6458	1588.5	825.211	1588.5	0	1564.08	-2.14336	1588.5	299.22
1590	348.593	1267.54	9.98041	1590	16630.3	1267.54	13.8862	1590	1091.24	1590	182.477	1565.13	3.97638	1590	466.545
1591.5	342.839	1268.64	6.40756	1591.5	17742.2	1268.64	1.79183	1591.5	1320.55	1591.5	272.356	1566.18	8.28288	1591.5	234.199
1593	408.106	1269.73	4.70919	1593	18095.9	1269.73	-2.50672	1593	1326.72	1593	189.554	1567.22	10.2435	1593	0
1594.5	257.102	1270.82	-0.579185	1594.5	18049.7	1270.82	-3.16076	1594.5	1046.68	1594.5	234.819	1568.27	9.64222	1594.5	116.906
1596	185.869	1271.92	-0.682037	1596	18618.4	1271.92	-4.0406	1596	955.958	1596	303.911	1569.32	6.61005	1596	437.825
1597.5	197.38	1273.01	-16.6404	1597.5	19673.4	1273.01	-6.2193	1597.5	1086.07	1597.5	215.956	1570.37	1.60301	1597.5	269.543
1599	285.232	1274.1	-18.3388	1599	19993.9	1274.1	-8.06673	1599	1113.98	1599	127.417	1571.41	-4.66612	1599	90.69
1600.5	407.388	1275.2	-8.17163	1600.5	20275.9	1275.2	-7.37644	1600.5	1239.07	1600.5	117.505	1572.46	-11.332	1600.5	283.614
1602	127.773	1276.29	0	1602	20821.5	1276.29	-3.63464	1602	1293.32	1602	77.1615	1573.51	-17.499	1602	87.5575
1603.5	139.444	1277.38	14.0474	1603.5	20968.6	1277.38	1.2971	1603.5	1156.01	1603.5	148.485	1574.55	-22.3646	1603.5	0
1605	584.199	1278.47	-4.30517	1605	21298.6	1278.47	4.48616	1605	1114.81	1605	353.662	1575.6	-25.3261	1605	621.129
1606.5	231.085	1279.57	3.71094	1606.5	21874.6	1279.57	3.98608	1606.5	889.148	1606.5	292.984	1576.65	-26.056	1606.5	738.158
1608	0	1280.66	14.4284	1608	22446.3	1280.66	0.102671	1608	885.123	1608	117.726	1577.69	-24.5381	1608	233.985
1609.5	539.019	1281.75	-7.25422	1609.5	23468.8	1281.75	-4.97717	1609.5	1368.19	1609.5	146.744	1578.74	-21.0608	1609.5	102.016
1611	915.775	1282.84	-14.2768	1611	24790.6	1282.84	-8.64127	1611	1620.44	1611	287.121	1579.78	-16.17	1611	385.633
1612.5	738.043	1283.94	-23.2007	1612.5	25486	1283.94	-9.29895	1612.5	1585.21	1612.5	313.989	1580.83	-10.5895	1612.5	655.266
1614	245.244	1285.03	-5.01328	1614	25722.4	1285.03	-6.89286	1614	1545.26	1614	146.779	1581.88	-5.11967	1614	381.504
1615.5	245.569	1286.12	1.56414	1615.5	26909.6	1286.12	-2.49648	1615.5	1933.54	1615.5	1.79188	1582.92	-0.528775	1615.5	0.04556
1617	510.329	1287.21	11.6216	1617	28001.2	1287.21	2.50332	1617	2172.89	1617	71.8684	1583.97	2.54824	1617	0.80685
1618.5	261.274	1288.3	-11.531	1618.5	28075.5	1288.3	6.99882	1618.5	1692.74	1618.5	229.01	1585.01	3.69091	1618.5	302.095
1620	238.142	1289.39	18.5164	1620	28950.2	1289.39	10.4025	1620	1570.79	1620	298.987	1586.06	2.74077	1620	383.506
1621.5	526.948	1290.48	30.7038	1621.5	30238	1290.48	12.7195	1621.5	2007.83	1621.5	316.399	1587.1	-0.188316	1621.5	8.57741
1623	576.657	1291.57	0.75122	1623	30614.5	1291.57	14.5884	1623	2452.62	1623	321.314	1588.14	-4.74101	1623	0
1624.5	433.982	1292.66	0.938637	1624.5	30263.2	1292.66	17.1688	1624.5	2555.63	1624.5	358.706	1589.19	-10.3843	1624.5	247.74
1626	200.188	1293.75	45.2561	1626	29627.7	1293.75	21.6719	1626	2279.04	1626	346.568	1590.23	-16.4944	1626	239.477
1627.5	405.685	1294.84	15.5735	1627.5	29303.7	1294.84	28.6199	1627.5	2117.56	1627.5	295.159	1591.28	-22.4513	1627.5	415.143
1629	597.064	1295.93	28.6909	1629	28585.5	1295.93	37.2972	1629	2126.18	1629	320.192	1592.32	-27.7239	1629	602.428
1630.5	222.203	1297.02	45.9383	1630.5	27021.5	1297.02	45.9147	1630.5	1934.89	1630.5	303.942	1593.37	-31.9329	1630.5	170.266
1632	87.4099	1298.11	66.7857	1632	25546.5	1298.11	52.5543	1632	1755.48	1632	225.744	1594.41	-34.8803	1632	0
1633.5	332.627	1299.2	64.5731	1633.5	24665	1299.2	56.3324	1633.5	1892.71	1633.5	181.684	1595.45	-36.5462	1633.5	392.3
1635	600.608	1300.29	62.7506	1635	24045.2	1300.29	57.9475	1635	2074.95	1635	195.368	1596.5	-37.0568	1635	505.795
1636.5	922.025	1301.38	33.738	1636.5	23158.5	1301.38	59.1561	1636.5	1910.92	1636.5	352.415	1597.54	-36.6344	1636.5	280.418
1638	768.503	1302.47	75.1254	1638	21953.3	1302.47	61.4972	1638	1617.47	1638	495.472	1598.58	-35.5451	1638	52.0602
1639.5	322.251	1303.56	56.5028	1639.5	20988.3	1303.56	65.1552	1639.5	1598.37	1639.5	487.845	1599.62	-34.0554	1639.5	160.918
1641	431.954	1304.65	67.6202	1641	20827.1	1304.65	68.7563	1641	1716.74	1641	327.453	1600.67	-32.4061	1641	301.734
1642.5	459.147	1305.73	82.2489	1642.5	20344.7	1305.73	70.2252	1642.5	1644.35	1642.5	200.013	1601.71	-30.8046	1642.5	129.208
1644	0	1306.82	85.6264	1644	18952.2	1306.82	68.0618	1644	1347.5	1644	306.255	1602.75	-29.4325	1644	0
1645.5	296.995	1307.91	50.2138	1645.5	18636.5	1307.91	62.2374	1645.5	1255.66	1645.5	363.598	1603.79	-28.4565	1645.5	52.914
1647	1105.23	1309	50.9312	1647	19124.2	1309	54.1303	1647	1485.39	1647	369.368	1604.84	-28.0342	1647	171.713
1648.5	1108.52	1310.09	44.9786	1648.5	18726.2	1310.09	45.7143	1648.5	1630.87	1648.5	471.506	1605.88	-28.3046	1648.5	115.047
1650	452.547	1311.17	50.9373	1650	17648.1	1311.17	38.5675	1650	1218.67	1650	475.648	1606.92	-29.3656	1650	0
1651.5	0	1312.26	12.3248	1651.5	16450.1	1312.26	33.2499	1651.5	703.814	1651.5	337.658	1607.96	-31.2397	1651.5	118.539
1653	483.973	1313.35	31.9722	1653	15612.4	1313.35	29.3263	1653	999.808	1653	267.724	1609	-33.8413	1653	141.713
1654.5	745.239	1314.44	30.5596	1654.5	15113.3	1314.44	25.8063	1654.5	1340.01	1654.5	388.615	1610.04	-36.959	1654.5	46.3968
1656	200.112	1315.52	34.1183	1656	14448.3	1315.52	21.7606	1656	1159.11	1656	436.721	1611.08	-40.2639	1656	273.968
1657.5	1012.67	1316.61	8.43573	1657.5	13999.7	1316.61	16.7993	1657.5	1555.71	1657.5	247.489	1612.12	-43.3488	1657.5	388.189
1659	2081.67	1317.69	3.05446	1659	13524.1	1317.69	11.3205	1659	2003.39	1659	239.358	1613.17	-45.7963	1659	270.982
1660.5	1266.31	1318.78	11.3719	1660.5	11986.4	1318.78	6.34376	1660.5	1380.54	1660.5	377.266	1614.21	-47.2603	1660.5	636.993
1662	92.4439	1319.87	2.08929	1662	10027.3	1319.87	3.07019	1662	650.781	1662	336.189	1615.25	-47.544	1662	797.509
1663.5	0	1320.95	3.51802	1663.5	8659.9	1320.95	2.23931	1663.5	426.192	1663.5	200.077	1616.29	-46.6529	1663.5	216.76
1665	669.154	1322.04	-2.83457	1665	7929.89	1322.04	3.64377	1665	504.766	1665	88.3307	1617.33	-44.8053	1665	0
1666.5	904.789	1323.13	-0.24715	1666.5	7218.22	1323.13	6.15213	1666.5	744.033	1666.5	217.868	1618.37	-42.3964	1666.5	269.605
1668	677.414	1324.21	7.84157	1668	6239.29	1324.21	8.24078	1668	885.977	1668	341.563	1619.41	-39.9184	1668	573.828
1669.5	758.125	1325.3	31.889	1669.5	5301.91	1325.3	8.79242	1669.5	901.007	1669.5	165.721	1620.45	-37.8551	1669.5	504.117
1671	1244.94	1326.38	-3.88228	1671	4985.75	1326.38	7.71368	1671	1014.27	1671	156.51	1621.48	-36.5749	1671	346.519
1672.5	1597.43	1327.47	6.96513	1672.5	4685.05	1327.47	5.90213	1672.5	1091.15	1672.5	348.823	1622.52	-36.2494	1672.5	572.9
1674	812.506	1328.55	7.32386	1674	3227.39	1328.55	4.70549	1674	582.543	1674	233.543	1623.56	-36.8157	1674	521.288
1675.5	0	1329.63	-5.64742	1675.5	2114.54	1329.63	5.13058	1675.5	0	1675.5	67.004	1624.6	-37.9947	1675.5	126.833
1677	438.999	1330.72	0	1677	2233.39	1330.72	7.36755	1677	94.0853	1677	180.201	1625.64	-39.3607	1677	0
1678.5	813.774	1331.8	17.5831	1678.5	2001.31	1331.8	10.8121	1678.5	319.093	1678.5	131.558	1626.68	-40.4425	1678.5	84.0202
1680	628.038	1332.89	24.8714	1680	1628.66	1332.89	14.4235	1680	438.609	1680	0	1627.72	-40.834	1680	171.817
1681.5	822.262	1333.97	13.7945	1681.5	1837.88	1333.97	17.2184	1681.5	745.471	1681.5	110.186	1628.75	-40.283	1681.5	131.271
1683	1327.89	1335.05	15.6476	1683	1874.87	1335.05	18.5493	1683	750.402	1683	277.065	1629.79	-38.7394	1683	99.6212
1684.5	1009.91	1336.14	20.1259	1684.5	1176.41	1336.14	18.2356	1684.5	371.472	1684.5	272.592	1630.83	-36.3495	1684.5	178.572
1686	141.995	1337.22	21.979	1686	349.248	1337.22	16.5815	1686	94.6198	1686	126.424	1631.87	-33.4027	1686	277.638
1687.5	390.225	1338.3	9.70217	1687.5	671.7	1338.3	14.2768	1687.5	391.9	1687.5	59.3028	1632.91	-30.2453	1687.5	348.123
1689	963.318	1339.39	6.18042	1689	1063.19	1339.39	12.2018	1689	663.432	1689	186.156	1633.94	-27.1881	1689	363.147
1690.5	595.784	1340.47	21.3736	1690.5	376.603	1340.47	11.0772	1690.5	283.944	1690.5	304.378	1634.98	-24.4325	1690.5	289.971
1692	598.194	1341.55	17.4867	1692	149.978	1341.55	11.0517	1692	263.911	1692	157.947	1636.02	-22.0342	1692	119.197
1693.5	1213.63	1342.63	-8.12018	1693.5	755.325	1342.63	11.5637	1693.5	597.452	1693.5	41.9305	1637.05	-19.9146	1693.5	0
1695	1519.5	1343.72	6.75807	1695	1301.98	1343.72	11.5963	1695	588.287	1695	216.914	1638.09	-17.9128	1695	327.431
1696.5	1298.5	1344.8	26.7512	1696.5	1080.2	1344.8	10.2989	1696.5	420.368	1696.5	375.316	1639.13	-15.8598	1696.5	652.498
1698	544.135	1345.88	12.6043	1698	295.237	1345.88	7.55968	1698	120.062	1698	284.464	1640.17	-13.6533	1698	325.7
1699.5	0	1346.96	13.9175	1699.5	0	1346.96	4.222	1699.5	0	1699.5	63.7374	1641.2	-11.3071	1699.5	0
1701	348.436	1348.05	-15.4643	1701	618.928	1348.05	1.72922	1701	437.762	1701	8.46396	1642.24	-8.96267	1701	0
1702.5	1197.06	1349.13	-11.3411	1702.5	1551.5	1349.13	1.43937	1702.5	954.604	1702.5	140.693	1643.27	-6.85523	1702.5	150.925
1704	1141.79	1350.21	2.24198	1704	1400.16	1350.21	3.93971	1704	531.802	1704	151.367	1644.31	-5.24925	1704	158.185
1705.5	412.258	1351.29	18.2251	1705.5	376.075	1351.29	8.77117	1705.5	11.5955	1705.5	38.7102	1645.34	-4.3583	1705.5	80.9142
1707	378.486	1352.37	9.54825	1707	0	1352.37	14.5936	1707	213.213	1707	14.73	1646.38	-4.27757	1707	212.245
1708.5	1084.02	1353.45	40.2014	1708.5	713.172	1353.45	19.6935	1708.5	557.627	1708.5	0	1647.41	-4.94649	1708.5	187.785
1710	969.135	1354.53	8.31451	1710	1049	1354.53	22.6299	1710	520.31	1710	99.9895	1648.45	-6.1563	1710	13.7911
1711.5	8.72037	1355.61	21.2376	1711.5	616.09	1355.61	22.8381	1711.5	196.541	1711.5	223.23	1649.48	-7.59787	1711.5	197.977
1713	563.967	1356.69	29.7608	1713	1196.62	1356.69	21.0199	1713	583.719	1713	158.983	1650.52	-8.93913	1713	357.12
1714.5	1307.51	1357.77	16.1439	1714.5	1496.64	1357.77	19.1337	1714.5	897.748	1714.5	143.807	1651.55	-9.9067	1714.5	208.176
1716	409.184	1358.85	13.467	1716	339.798	1358.85	19.8495	1716	215.827	1716	94.4456	1652.59	-10.3511	1716	51.3746
1717.5	0	1359.93	36.1202	1717.5	0	1359.93	25.5451	1717.5	0	1717.5	15.5409	1653.62	-10.2742	1717.5	141.251
1719	915.816	1361.01	11.1733	1719	717.573	1361.01	37.2307	1719	539.701	1719	96.4217	1654.66	-9.8143	1719	405.195
1720.5	1690.68	1362.09	41.4164	1720.5	1186.28	1362.09	53.9666	1720.5	841.077	1720.5	157.929	1655.69	-9.1931	1720.5	362.74
1722	1501.65	1363.17	80.4696	1722	881.384	1363.17	73.1796	1722	700.04	1722	204.8	1656.72	-8.64258	1722	168.31
1723.5	642.462	1364.25	99.1227	1723.5	284.295	1364.25	91.8	1723.5	267.531	1723.5	201.938	1657.76	-8.3341	1723.5	196.267
1725	141.949	1365.33	133.246	1725	98.2235	1365.33	107.634	1725	0	1725	171.942	1658.79	-8.33139	1725	531.298
1726.5	622.609	1366.41	105.369	1726.5	189.764	1366.41	120.202	1726.5	162.306	1726.5	207.412	1659.83	-8.58206	1726.5	544.23
1728	1212.96	1367.48	136.857	1728	564.732	1367.48	130.604	1728	431.395	1728	210.625	1660.86	-8.94685	1728	0
1729.5	1402.62	1368.56	120.17	1729.5	1296.96	1368.56	140.516	1729.5	638.962	1729.5	188.881	1661.89	-9.25823	1729.5	260.305
1731	1331.31	1369.64	156.823	1731	1249.69	1369.64	151.032	1731	586.487	1731	230.791	1662.93	-9.38598	1731	733.431
1732.5	786.273	1370.72	171.076	1732.5	390.237	1370.72	161.955	1732.5	251.744	1732.5	226.289	1663.96	-9.28843	1732.5	227.294
1734	359.28	1371.8	168.13	1734	0	1371.8	171.921	1734	154.304	1734	186.334	1664.99	-9.03247	1734	141.534
1735.5	555.412	1372.87	195.218	1735.5	577.145	1372.87	179.158	1735.5	236.909	1735.5	210.106	1666.02	-8.77353	1735.5	457.085
1737	706.868	1373.95	174.941	1737	1048.51	1373.95	182.346	1737	243.608	1737	200.195	1667.05	-8.70273	1737	250.198
1738.5	517.725	1375.03	193.054	1738.5	504.164	1375.03	181.178	1738.5	309.484	1738.5	115.421	1668.09	-8.97789	1738.5	234.333
1740	785.916	1376.11	165.847	1740	581.999	1376.11	176.36	1740	515.357	1740	0	1669.12	-9.6608	1740	354.383
1741.5	1230.17	1377.18	182.265	1741.5	1134.5	1377.18	169.253	1741.5	712.054	1741.5	4.34131	1670.15	-10.6837	1741.5	0
1743	485.222	1378.26	153.178	1743	487.163	1378.26	161.374	1743	349.193	1743	140.289	1671.18	-11.856	1743	0
1744.5	0	1379.34	161.971	1744.5	0	1379.34	154.047	1744.5	0	1744.5	161.034	1672.21	-12.9128	1744.5	384.036
1746	800.069	1380.41	140.789	1746	607.317	1380.41	148.209	1746	331.293	1746	180.463	1673.24	-13.5911	1746	348.783
1747.5	1181.77	1381.49	141.312	1747.5	974.939	1381.49	144.366	1747.5	646.495	1747.5	217.641	1674.28	-13.7116	1747.5	436.8
1749	587.273	1382.56	132.53	1749	429.335	1382.56	142.627	1749	362.513	1749	195.6	1675.31	-13.2389	1749	698.128
1750.5	41.4718	1383.64	153.313	1750.5	0	1383.64	142.66	1750.5	0	1750.5	131.086	1676.34	-12.3023	1750.5	440.344
1752	977.323	1384.72	134.497	1752	1194.37	1384.72	143.678	1752	568.817	1752	112.822	1677.37	-11.1657	1752	149.262
1753.5	1470.09	1385.79	158.925	1753.5	1828.95	1385.79	144.429	1753.5	964.226	1753.5	281.523	1678.4	-10.155	1753.5	219.488
1755	128.42	1386.87	134.378	1755	627.952	1386.87	143.345	1755	254.185	1755	292.171	1679.43	-9.56096	1755	434.026
1756.5	0	1387.94	151.596	1756.5	473.569	1387.94	138.93	1756.5	156.047	1756.5	81.7545	1680.46	-9.54684	1756.5	457.459
1758	707.093	1389.02	130.249	1758	1055.89	1389.02	130.231	1758	492.296	1758	83.6882	1681.49	-10.0864	1758	267.497
1759.5	546.93	1390.09	119.467	1759.5	1000.67	1390.09	117.333	1759.5	348.326	1759.5	176.628	1682.52	-10.9533	1759.5	234.277
1761	572.089	1391.17	103.59	1761	1101.48	1391.17	101.508	1761	518.468	1761	96.7543	1683.55	-11.7666	1761	198.666
1762.5	528.895	1392.24	88.408	1762.5	1008.32	1392.24	85.0122	1762.5	513.042	1762.5	53.4234	1684.58	-12.0824	1762.5	77.9466
1764	134.159	1393.32	75.5912	1764	714.613	1393.32	70.4171	1764	127.039	1764	109.2	1685.61	-11.5085	1764	165.246
1765.5	513.231	1394.39	31.2192	1765.5	1618.29	1394.39	59.8233	1765.5	549.418	1765.5	30.6114	1686.64	-9.81188	1765.5	180.791
1767	1101.38	1395.46	59.3672	1767	2592.28	1395.46	54.1396	1767	1101.25	1767	20.3915	1687.67	-6.99026	1767	68.2188
1768.5	977.322	1396.54	41.0903	1768.5	2433.64	1396.54	52.8198	1768.5	891.855	1768.5	211.575	1688.69	-3.2891	1768.5	431.59
1770	363.113	1397.61	55.7783	1770	1807.66	1397.61	54.1761	1770	276.23	1770	311.164	1689.72	0.841243	1770	543.795
1771.5	0	1398.69	70.8315	1771.5	1576.32	1398.69	56.1534	1771.5	0	1771.5	165.976	1690.75	4.83875	1771.5	0
1773	625.939	1399.76	71.1195	1773	2394.54	1399.76	57.3447	1773	501.095	1773	9.69675	1691.78	8.14918	1773	33.1828
1774.5	1230.85	1400.83	29.9375	1774.5	3345.16	1400.83	57.6391	1774.5	776.569	1774.5	145.651	1692.81	10.3442	1774.5	355.001
1776	1070.51	1401.91	57.6606	1776	3739.27	1401.91	58.1863	1776	598.951	1776	208.849	1693.84	11.2107	1776	238.673
1777.5	739.067	1402.98	63.1486	1777.5	3898.22	1402.98	60.5822	1777.5	548.83	1777.5	32.353	1694.86	10.7912	1777.5	15.1213
1779	309.636	1404.05	80.6366	1779	3907.05	1404.05	65.6865	1779	343.106	1779	0	1695.89	9.36954	1779	47.4341
1780.5	216.324	1405.12	46.2547	1780.5	4294.83	1405.12	72.9165	1780.5	397.897	1780.5	59.3308	1696.92	7.40697	1780.5	369.847
1782	592.19	1406.2	79.8378	1782	5274.64	1406.2	80.5331	1782	857.896	1782	0	1697.95	5.4456	1782	460.769
1783.5	949.105	1407.27	113.996	1783.5	6261.37	1407.27	86.8867	1783.5	888.035	1783.5	44.9391	1698.97	4.00165	1783.5	240.187
1785	1020.64	1408.34	92.0138	1785	6963.85	1408.34	91.7468	1785	687.677	1785	171.005	1700	3.47038	1785	0
1786.5	837.763	1409.41	78.4318	1786.5	7405.13	1409.41	96.79	1786.5	762.699	1786.5	212.619	1701.03	4.06182	1786.5	99.6946
1788	339.248	1410.48	96.5898	1788	7592.44	1410.48	104.756	1788	735.052	1788	136.568	1702.06	5.77465	1788	265.894
1789.5	51.7951	1411.56	118.973	1789.5	8291.76	1411.56	117.857	1789.5	701.071	1789.5	64.2113	1703.08	8.41026	1789.5	113.856
1791	522.243	1412.63	138.201	1791	10112.9	1412.63	136.646	1791	1003.47	1791	175.615	1704.11	11.6185	1791	62.3916
1792.5	720.157	1413.7	149.289	1792.5	11777.1	1413.7	160.15	1792.5	1226.16	1792.5	255.743	1705.13	14.965	1792.5	107.357
1794	554.933	1414.77	180.377	1794	13057.1	1414.77	187.15	1794	1241.68	1794	214.293	1706.16	18.0026	1794	39.1226
1795.5	701.7	1415.84	216.525	1795.5	14517.2	1415.84	217.397	1795.5	1297.55	1795.5	206.565	1707.19	20.3386	1795.5	84.5974
1797	506.156	1416.91	260.143	1797	15693.9	1416.91	251.633	1797	1080.22	1797	142.022	1708.21	21.6855	1797	185.607
1798.5	0	1417.98	279.631	1798.5	16951.2	1417.98	290.321	1798.5	996.586	1798.5	51.4404	1709.24	21.8896	1798.5	128.746
1800	0	1419.05	321.519	1800	19088.8	1419.05	332.208	1800	1665.97	1800	139.595	1710.26	20.9403	1800	0
1801.5	410.566	1420.12	381.277	1801.5	21410.2	1420.12	374.149	1801.5	2100.39	1801.5	253.129	1711.29	18.9565	1801.5	0
1803	485.892	1421.19	409.835	1803	23562.1	1421.19	412.646	1803	1998.38	1803	227.505	1712.31	16.1606	1803	212.623
1804.5	409.199	1422.26	469.853	1804.5	26038.3	1422.26	446.093	1804.5	2131.39	1804.5	256.919	1713.34	12.8404	1804.5	320.157
1806	457.328	1423.33	483.341	1806	28309.3	1423.33	476.003	1806	2440.76	1806	457.034	1714.36	9.31058	1806	356.128
1807.5	404.518	1424.4	495.229	1807.5	30217.7	1424.4	506.177	1807.5	2580.53	1807.5	595.754	1715.39	5.8743	1807.5	532.351
1809	281.074	1425.47	525.117	1809	32414.3	1425.47	540.373	1809	2602.74	1809	472.056	1716.41	2.79488	1809	559.763
1810.5	290.738	1426.54	574.605	1810.5	35565	1426.54	580.113	1810.5	2952.79	1810.5	458.946	1717.44	0.275941	1810.5	305.781
1812	435.322	1427.61	606.353	1812	38687.6	1427.61	624.049	1812	3348.3	1812	681.488	1718.46	-1.54541	1812	0
1813.5	327.406	1428.68	676.111	1813.5	40276.2	1428.68	669.061	1813.5	3184.37	1813.5	860.283	1719.49	-2.59684	1813.5	222.595
1815	23.556	1429.74	739.634	1815	41335.5	1429.74	712.13	1815	3118.66	1815	818.092	1720.51	-2.86074	1815	560.465
1816.5	0	1430.81	766.452	1816.5	43055.9	1430.81	751.97	1816.5	3420.58	1816.5	725.151	1721.53	-2.36292	1816.5	146.449
1818	279.991	1431.88	779.54	1818	45526.8	1431.88	790.191	1818	3724.43	1818	790.824	1722.56	-1.1617	1818	64.2186
1819.5	617.674	1432.95	806.228	1819.5	47423.4	1432.95	832.042	1819.5	4045.92	1819.5	840.762	1723.58	0.65887	1819.5	457.08
1821	648.359	1434.02	868.646	1821	48505.9	1434.02	886.61	1821	4226.2	1821	805.997	1724.6	2.99004	1821	602.596
1822.5	396.768	1435.09	927.874	1822.5	49376.7	1435.09	965.709	1822.5	4136.12	1822.5	824.227	1725.63	5.69687	1822.5	602.008
1824	133.152	1436.15	1041.93	1824	49699.6	1436.15	1081.4	1824	3731.08	1824	829.232	1726.65	8.61639	1824	424.818
1825.5	0	1437.22	1211.81	1825.5	50290	1437.22	1243.95	1825.5	3581	1825.5	686.429	1727.67	11.5582	1825.5	9.51566
1827	471.535	1438.29	1413.3	1827	52362.9	1438.29	1463.7	1827	4473.64	1827	526.02	1728.7	14.3124	1827	0
1828.5	748.847	1439.35	1646.29	1828.5	53652.9	1439.35	1758.42	1828.5	4904.01	1828.5	618.468	1729.72	16.6645	1828.5	229.851
1830	320.284	1440.42	2011.91	1830	53887.9	1440.42	2162.8	1830	4388.56	1830	758.722	1730.74	18.4161	1830	153.169
1831.5	529.922	1441.49	2579.13	1831.5	55059.1	1441.49	2731.12	1831.5	4327.35	1831.5	828.579	1731.76	19.4095	1831.5	151.271
1833	612.815	1442.55	3275.85	1833	55774.5	1442.55	3523.7	1833	4605.7	1833	724.249	1732.78	19.5495	1833	306.229
1834.5	42.6764	1443.62	4266.81	1834.5	55688.5	1443.62	4576.35	1834.5	4708.35	1834.5	533.693	1733.81	18.8194	1834.5	329.822
1836	16.1245	1444.69	5563.6	1836	56185.6	1444.69	5865.45	1836	4872.2	1836	692.308	1734.83	17.2877	1836	140.858
1837.5	887.509	1445.75	7172.9	1837.5	56999.4	1445.75	7290.9	1837.5	5060.52	1837.5	741.02	1735.85	15.1022	1837.5	3.58715
1839	1316.59	1446.82	8968.37	1839	57013.7	1446.82	8695.5	1839	5002.2	1839	587.922	1736.87	12.4743	1839	233.389
1840.5	458.861	1447.89	10386.8	1840.5	55646.4	1447.89	9919.97	1840.5	4700.46	1840.5	664.441	1737.89	9.65498	1840.5	505.279
1842	62.7338	1448.95	11352.4	1842	53652.3	1448.95	10868.6	1842	4232.48	1842	670.11	1738.91	6.90459	1842	490.612
1843.5	370.042	1450.02	11795.7	1843.5	51681.5	1450.02	11547.7	1843.5	4010.08	1843.5	534.368	1739.93	4.46219	1843.5	163.003
1845	707.328	1451.08	12002.4	1845	49846.6	1451.08	12048.4	1845	4323.49	1845	512.875	1740.96	2.51606	1845	74.1112
1846.5	907.329	1452.15	12234.4	1846.5	47004.9	1452.15	12477.8	1846.5	4107.71	1846.5	477.236	1741.98	1.18009	1846.5	147.908
1848	653.453	1453.21	12705.8	1848	43282.4	1453.21	12874.5	1848	3368.33	1848	310.603	1743	0.477148	1848	0
1849.5	678.754	1454.28	13320.1	1849.5	40105.3	1454.28	13158.4	1849.5	3244.46	1849.5	314.197	1744.02	0.334354	1849.5	71.3548
1851	490.426	1455.34	13772.6	1851	36531.2	1455.34	13151.7	1851	2803.79	1851	436.887	1745.04	0.591228	1851	286.378
1852.5	0	1456.41	13553.7	1852.5	32426.6	1456.41	12662	1852.5	2022.18	1852.5	344.981	1746.06	1.02255	1852.5	256.371
1854	539.982	1457.47	12393.9	1854	29172.6	1457.47	11587.8	1854	2078.71	1854	124.157	1747.08	1.37511	1854	319.725
1855.5	1190.9	1458.53	10385.7	1855.5	26433.3	1458.53	9985.32	1855.5	2091.79	1855.5	143.217	1748.1	1.41458	1855.5	342.951
1857	713.14	1459.6	7915	1857	23297.8	1459.6	8063.35	1857	1518.05	1857	159.221	1749.11	0.975324	1857	47.8629
1858.5	0	1460.66	5618.5	1858.5	20249.4	1460.66	6108.13	1858.5	1143.72	1858.5	2.62991	1750.13	0.00273961	1858.5	0
1860	518.295	1461.73	3853.71	1860	18460.2	1461.73	4380.24	1860	1265.85	1860	4.7111	1751.15	-1.42133	1860	313.214
1861.5	1511.5	1462.79	2616.56	1861.5	17223.8	1462.79	3034.79	1861.5	1470.46	1861.5	217.113	1752.17	-3.08116	1861.5	598.783
1863	1073.04	1463.85	1819.68	1863	15023.9	1463.85	2097.89	1863	1071.01	1863	312.663	1753.19	-4.66046	1863	333.039
1864.5	0	1464.92	1376.37	1864.5	12591.1	1464.92	1498.44	1864.5	718.013	1864.5	211.136	1754.21	-5.80465	1864.5	0
1866	22.2714	1465.98	1038.69	1866	11187.5	1465.98	1126.95	1866	809.787	1866	138.346	1755.23	-6.2014	1866	244.004
1867.5	986.79	1467.04	821.418	1867.5	10560.1	1467.04	886.901	1867.5	875.527	1867.5	137.194	1756.25	-5.66328	1867.5	419.887
1869	1006.46	1468.1	659.34	1869	9164.92	1468.1	718.2	1869	875.144	1869	189.837	1757.27	-4.19286	1869	380.501
1870.5	426.361	1469.17	580.828	1870.5	7496.01	1469.17	593.403	1870.5	624.066	1870.5	215.394	1758.28	-2.01284	1870.5	372.466
1872	456.473	1470.23	498.351	1872	6630.6	1470.23	501.448	1872	269.552	1872	166.066	1759.3	0.449268	1872	458.286
1873.5	1040.46	1471.29	420.944	1873.5	6207.32	1471.29	434.3	1873.5	582.82	1873.5	130.138	1760.32	2.62421	1873.5	477.506
1875	1376.99	1472.35	370.597	1875	5658.71	1472.35	383.053	1875	974.402	1875	183.225	1761.34	3.8997	1875	344.046
1876.5	736.963	1473.41	334.92	1876.5	4611.4	1473.41	340.437	1876.5	616.429	1876.5	201.37	1762.35	3.737	1876.5	348.752
1878	869.005	1474.47	294.173	1878	4300.72	1474.47	303.351	1878	710.807	1878	225.019	1763.37	1.77989	1878	336.202
1879.5	1278.56	1475.54	272.331	1879.5	4137.67	1475.54	271.953	1879.5	1005.03	1879.5	309.304	1764.39	-2.06593	1879.5	118.364
1881	320.56	1476.6	222.514	1881	2885.61	1476.6	246.559	1881	403.831	1881	178.343	1765.41	-7.60155	1881	0
1882.5	0	1477.66	252.977	1882.5	2275.1	1477.66	225.593	1882.5	0	1882.5	0	1766.42	-14.3569	1882.5	90.4281
1884	672.64	1478.72	203.96	1884	2387.86	1478.72	206.321	1884	329.637	1884	100.153	1767.44	-21.6619	1884	299.681
1885.5	828.441	1479.78	184.952	1885.5	1998.17	1479.78	187.078	1885.5	609.218	1885.5	273.106	1768.45	-28.7492	1885.5	148.404
1887	746.632	1480.84	152.205	1887	1746.17	1480.84	168.544	1887	590.71	1887	218.369	1769.47	-34.8719	1887	32.9453
1888.5	868.999	1481.9	156.398	1888.5	1619	1481.9	152.861	1888.5	695.873	1888.5	167.03	1770.49	-39.4088	1888.5	273.068
1890	740.392	1482.96	130.851	1890	1196.81	1482.96	141.53	1890	726.726	1890	178.37	1771.5	-41.9451	1890	380.706
1891.5	688.486	1484.02	136.374	1891.5	1255.33	1484.02	134.036	1891.5	588.177	1891.5	135.782	1772.52	-42.3159	1891.5	402.33
1893	812.98	1485.08	143.767	1893	1446.01	1485.08	128.237	1893	543.556	1893	92.1859	1773.54	-40.6105	1893	482.943
1894.5	543.329	1486.14	112.09	1894.5	1052.36	1486.14	121.878	1894.5	417.392	1894.5	30.3237	1774.55	-37.1445	1894.5	500.862
1896	141.737	1487.2	104.673	1896	567.394	1487.2	113.81	1896	272.929	1896	91.3654	1775.57	-32.4075	1896	339.071
1897.5	12.3787	1488.26	113.266	1897.5	511.883	1488.26	104.042	1897.5	355.268	1897.5	189.92	1776.58	-26.995	1897.5	72.1416
1899	165.21	1489.32	98.6585	1899	692.062	1489.32	93.0124	1899	534.138	1899	183.808	1777.6	-21.5363	1899	0
1900.5	552.681	1490.38	92.8414	1900.5	605.547	1490.38	81.0454	1900.5	565.15	1900.5	174.942	1778.61	-16.6211	1900.5	229.437
1902	613.895	1491.44	47.1642	1902	336.349	1491.44	68.5117	1902	451.211	1902	208.556	1779.63	-12.7325	1902	546.833
1903.5	175.666	1492.5	60.1571	1903.5	0	1492.5	56.2924	1903.5	164.053	1903.5	174.245	1780.64	-10.1894	1903.5	505.46
1905	162.5	1493.55	45.4449	1905	0	1493.55	45.7867	1905	0	1905	34.3089	1781.66	-9.10556	1905	471.675
1906.5	547.033	1494.61	43.7678	1906.5	371.062	1494.61	38.1787	1906.5	111.68	1906.5	17.1583	1782.67	-9.37171	1906.5	526.825
1908	656.004	1495.67	17.5607	1908	684.609	1495.67	33.5874	1908	329.388	1908	100.029	1783.68	-10.6687	1908	304.427
1909.5	419.585	1496.73	24.8136	1909.5	625.679	1496.73	30.8624	1909.5	532.212	1909.5	128.331	1784.7	-12.5144	1909.5	161.448
1911	275.632	1497.79	37.9365	1911	477.823	1497.79	28.3711	1911	422.091	1911	148.541	1785.71	-14.3424	1911	285.506
1912.5	274.026	1498.85	39.4593	1912.5	333.523	1498.85	25.1636	1912.5	239.737	1912.5	150.903	1786.72	-15.6045	1912.5	437.299
1914	0	1499.9	19.6771	1914	0	1499.9	21.5688	1914	266.938	1914	17.47	1787.74	-15.8764	1914	234.911
1915.5	0	1500.96	0	1915.5	0	1500.96	18.7239	1915.5	120	1915.5	29.9786	1788.75	-14.9459	1915.5	0
1917	616.626	1502.02	20.793	1917	361.586	1502.02	17.5078	1917	141.017	1917	229.955	1789.76	-12.8624	1917	256.288
1918.5	904.55	1503.07	3.74906	1918.5	263.699	1503.07	17.7233	1918.5	287.075	1918.5	184.71	1790.78	-9.93046	1918.5	252.402
1920	523.73	1504.13	45.3421	1920	1.42252	1504.13	18.2017	1920	53.6962	1920	132.221	1791.79	-6.64503	1920	103.036
1921.5	326.572	1505.19	14.3951	1921.5	112.313	1505.19	17.7167	1921.5	80.7364	1921.5	214.804	1792.8	-3.58021	1921.5	420.176
1923	618.172	1506.24	11.0812	1923	443.657	1506.24	15.8848	1923	625.728	1923	219.037	1793.82	-1.25441	1923	672.696
1924.5	747.037	1507.3	17.4742	1924.5	564.294	1507.3	13.3959	1924.5	535.869	1924.5	217.948	1794.83	-0.00512962	1924.5	477.874
1926	228.852	1508.36	-2.67278	1926	248.255	1508.36	11.5059	1926	0	1926	104.164	1795.84	0.0933323	1926	0
1927.5	0	1509.41	13.2132	1927.5	105.494	1509.41	11.1944	1927.5	137.299	1927.5	0	1796.85	-0.752601	1927.5	5.00399
1929	274.534	1510.47	21.4763	1929	0	1510.47	12.6239	1929	386.152	1929	93.3506	1797.86	-2.1122	1929	262.194
1930.5	438.377	1511.52	11.6323	1930.5	52.3205	1511.52	15.2045	1930.5	299.516	1930.5	153.731	1798.88	-3.44892	1930.5	247.655
1932	476.191	1512.58	16.6853	1932	522.627	1512.58	17.9816	1932	179.492	1932	91.2154	1799.89	-4.27197	1932	217.377
1933.5	186.421	1513.64	10.9384	1933.5	265.64	1513.64	20.1092	1933.5	85.7871	1933.5	72.7031	1800.9	-4.28365	1933.5	180.034
1935	35.5822	1514.69	31.2244	1935	0	1514.69	21.0783	1935	0	1935	110.304	1801.91	-3.48102	1935	70.0268
1936.5	233.572	1515.75	30.8174	1936.5	211.37	1515.75	20.7517	1936.5	7.24975	1936.5	170.008	1802.92	-2.18425	1936.5	0
1938	0	1516.8	18.0435	1938	59.3267	1516.8	19.3549	1938	93.938	1938	170.94	1803.93	-0.979811	1938	52.3005
1939.5	28.9247	1517.85	8.99949	1939.5	140.947	1517.85	17.3727	1939.5	260.767	1939.5	90.7878	1804.94	-0.589353	1939.5	224.225
1941	344.277	1518.91	2.45252	1941	435.982	1518.91	15.4135	1941	353.678	1941	0	1805.95	-1.69433	1941	226.736
1942.5	134.35	1519.96	34.4785	1942.5	114.992	1519.96	13.9933	1942.5	311.043	1942.5	106.031	1806.96	-4.7588	1942.5	182.3
1944	151.532	1521.02	17.8016	1944	0	1521.02	13.2983	1944	265.231	1944	241.376	1807.97	-9.89422	1944	214.8
1945.5	480.338	1522.07	-3.25239	1945.5	272.223	1522.07	13.1761	1945.5	173.102	1945.5	271.168	1808.99	-16.8006	1945.5	249.139
1947	466.338	1523.13	7.14064	1947	308.371	1523.13	13.2748	1947	8.8647	1947	317.359	1810	-24.7995	1947	181.25
1948.5	464.863	1524.18	24.7667	1948.5	211.249	1524.18	13.3354	1948.5	268.623	1948.5	251.528	1811.01	-32.9534	1948.5	123.156
1950	459.037	1525.23	21.9827	1950	187.773	1525.23	13.3079	1950	556.688	1950	75.198	1812.02	-40.2434	1950	291.554
1951.5	165.796	1526.29	5.17573	1951.5	264.478	1526.29	13.2908	1951.5	142.373	1951.5	0	1813.02	-45.7648	1951.5	422.53
1953	212.421	1527.34	11.2018	1953	246.69	1527.34	13.3405	1953	0	1953	143.423	1814.03	-48.8971	1953	293.777
1954.5	388.751	1528.39	4.15778	1954.5	185.776	1528.39	13.3107	1954.5	246.214	1954.5	311.825	1815.04	-49.4094	1954.5	0
1956	272.955	1529.45	23.2108	1956	258.804	1529.45	12.9179	1956	414.732	1956	229.165	1816.05	-47.482	1956	82.9911
1957.5	237.392	1530.5	24.1668	1957.5	138.973	1530.5	11.9449	1957.5	307.199	1957.5	139.987	1817.06	-43.6414	1957.5	326.75
1959	228.309	1531.55	2.18286	1959	0	1531.55	10.376	1959	79.8277	1959	127.793	1818.07	-38.6293	1959	205.443
1960.5	435.237	1532.6	0.33889	1960.5	221.467	1532.6	8.41935	1960.5	164.299	1960.5	188.941	1819.08	-33.2361	1960.5	148.223
1962	786.215	1533.66	8.20192	1962	329.973	1533.66	6.37531	1962	327.818	1962	220.229	1820.09	-28.1409	1962	167.654
1963.5	543.473	1534.71	8.08795	1963.5	197.628	1534.71	4.52333	1963.5	188.891	1963.5	162.793	1821.1	-23.7906	1963.5	79.0976
1965	0	1535.76	7.44397	1965	125.415	1535.76	3.05409	1965	0	1965	122.751	1822.1	-20.3429	1965	0
1966.5	263.151	1536.81	0	1966.5	0	1536.81	2.10335	1966.5	268.787	1966.5	122.805	1823.11	-17.6813	1966.5	108.006
1968	765.721	1537.86	-3.60052	1968	83.2925	1537.86	1.73354	1968	514.357	1968	114.301	1824.12	-15.4908	1968	299.848
1969.5	732.842	1538.92	-8.4481	1969.5	234.545	1538.92	1.84522	1969.5	302.781	1969.5	62.3539	1825.13	-13.3726	1969.5	113.892
1971	743.262	1539.97	20.0814	1971	87.0934	1539.97	2.11599	1971	193.176	1971	138.318	1826.14	-10.9675	1971	0
1972.5	533.112	1541.02	-0.859139	1972.5	37.4687	1541.02	2.03192	1972.5	148.536	1972.5	192.089	1827.14	-8.05747	1972.5	204.09
1974	269.121	1542.07	-2.05966	1974	283.575	1542.07	1.1313	1974	176.063	1974	114.579	1828.15	-4.62461	1974	358.01
1975.5	351.308	1543.12	4.19982	1975.5	374.797	1543.12	-0.718502	1975.5	293.901	1975.5	0	1829.16	-0.854013	1975.5	364.813
1977	514.593	1544.17	-8.6007	1977	314.032	1544.17	-3.18533	1977	409.664	1977	57.4137	1830.16	2.91363	1977	440.566
1978.5	896.738	1545.22	-4.34123	1978.5	482.338	1545.22	-5.60132	1978.5	616.239	1978.5	307.264	1831.17	6.26659	1978.5	776.408
1980	770.689	1546.27	-3.81175	1980	408.414	1546.27	-7.29128	1980	404.304	1980	226.382	1832.18	8.82237	1980	684.645
1981.5	557.611	1547.32	-9.28227	1981.5	128.87	1547.32	-7.89434	1981.5	129.893	1981.5	33.5891	1833.18	10.3177	1981.5	374.213
1983	748.924	1548.37	-21.6828	1983	272.309	1548.37	-7.48794	1983	196.986	1983	56.3912	1834.19	10.6688	1983	521.657
1984.5	431.84	1549.42	10.4467	1984.5	451.06	1549.42	-6.47352	1984.5	113.517	1984.5	82.3113	1835.2	9.99012	1984.5	422.626
1986	224.934	1550.47	-15.9638	1986	383.81	1550.47	-5.34297	1986	257.29	1986	80.0525	1836.2	8.56714	1986	225.919
1987.5	357.072	1551.52	-0.904355	1987.5	329.044	1551.52	-4.49093	1987.5	374.06	1987.5	107.194	1837.21	6.79289	1987.5	349.768
1989	182.296	1552.57	0.295123	1989	187.122	1552.57	-4.15595	1989	0	1989	90.2822	1838.21	5.0835	1989	167.678
1990.5	0	1553.62	-1.8354	1990.5	25.3394	1553.62	-4.45101	1990.5	62.0934	1990.5	167.817	1839.22	3.7904	1990.5	0
1992	56.595	1554.67	-11.0459	1992	0	1554.67	-5.38768	1992	251.72	1992	210.889	1840.22	3.13076	1992	158.011
1993.5	89.4222	1555.72	-16.5164	1993.5	0	1555.72	-6.84163	1993.5	93.2377	1993.5	69.3885	1841.23	3.14757	1993.5	56.3865
1995	0	1556.76	6.18009	1995	188.511	1556.76	-8.49235	1995	146.721	1995	67.3073	1842.23	3.70942	1995	123.164
1996.5	80.0938	1557.81	1.10957	1996.5	305.626	1557.81	-9.84844	1996.5	219.377	1996.5	122.717	1843.24	4.54607	1996.5	448.692
1998	235.317	1558.86	-36.361	1998	149.231	1558.86	-10.354	1998	106.939	1998	66.1639	1844.24	5.3142	1998	244.473
1999.5	204.129	1559.91	-3.70148	1999.5	0	1559.91	-9.62965	1999.5	73.5499	1999.5	4.39715	1845.25	5.67635	1999.5	0
2001	179.552	1560.96	-5.172	2001	28.9714	1560.96	-7.68117	2001	71.4305	2001	32.4374	1846.25	5.37983	2001	49.5805
2002.5	190.181	1562	-11.1355	2002.5	135.333	1562	-4.97409	2002.5	118.228	2002.5	100.738	1847.26	4.31716	2002.5	212.45
2004	52.105	1563.05	12.594	2004	63.4989	1563.05	-2.32017	2004	200.839	2004	59.6522	1848.26	2.55913	2004	268.235
2005.5	0	1564.1	-20.3465	2005.5	0	1564.1	-0.538429	2005.5	62.9002	2005.5	15.4473	1849.27	0.351518	2005.5	148.135
2007	89.677	1565.15	24.723	2007	84.8113	1565.15	-0.0950484	2007	0	2007	20.2001	1850.27	-1.92131	2007	0
2008.5	105.359	1566.19	-12.9805	2008.5	203.421	1566.19	-0.836835	2008.5	200.162	2008.5	0	1851.27	-3.8021	2008.5	164.801
2010	131.334	1567.24	-1.78102	2010	244.069	1567.24	-2.02213	2010	249.077	2010	33.8199	1852.28	-4.84187	2010	341.48
2011.5	273.936	1568.29	-5.39154	2011.5	133.411	1568.29	-2.62203	2011.5	118.105	2011.5	84.0458	1853.28	-4.68288	2011.5	187.747
2013	451.447	1569.33	1.30499	2013	0	1569.33	-1.84271	2013	18.4134	2013	69.7368	1854.28	-3.12917	2013	219.577
2014.5	379.858	1570.38	-6.42553	2014.5	150.048	1570.38	0.419511	2014.5	85.7583	2014.5	36.3451	1855.29	-0.189977	2014.5	431.958
2016	344.027	1571.43	9.16394	2016	395.239	1571.43	3.47585	2016	224.806	2016	88.713	1856.29	3.91198	2016	518.173
2017.5	293.976	1572.47	1.33047	2017.5	327.262	1572.47	6.12134	2017.5	213.477	2017.5	140.463	1857.29	8.76933	2017.5	314.284
2019	362.911	1573.52	8.65995	2019	268.363	1573.52	7.20078	2019	276.833	2019	73.7516	1858.29	13.8538	2019	357.93
2020.5	451.274	1574.57	25.1894	2020.5	454.905	1574.57	6.20819	2020.5	232.665	2020.5	59.0546	1859.3	18.6032	2020.5	615.951
2022	331.393	1575.61	-17.174	2022	496.708	1575.61	3.5456	2022	46.7268	2022	84.2998	1860.3	22.5173	2022	363.866
2023.5	195.726	1576.66	14.9554	2023.5	121.387	1576.66	0.335543	2023.5	80.9962	2023.5	12.3672	1861.3	25.244	2023.5	135.066
2025	248.377	1577.7	-4.74803	2025	155.717	1577.7	-2.08148	2025	192.232	2025	76.4698	1862.3	26.6402	2025	224.533
2026.5	348.759	1578.75	-15.9485	2026.5	405.136	1578.75	-2.79615	2026.5	252.556	2026.5	211.093	1863.31	26.7952	2026.5	336.281
2028	39.7086	1579.79	-2.72202	2028	76.7851	1579.79	-1.69221	2028	87.1939	2028	74.9635	1864.31	26.0112	2028	83.6014
2029.5	0	1580.84	0.20746	2029.5	0	1580.84	0.541707	2029.5	0	2029.5	0	1865.31	24.7427	2029.5	0
2031	446.241	1581.88	19.574	2031	339.686	1581.88	2.86525	2031	136.97	2031	66.7683	1866.31	23.51	2031	447.803
2032.5	438.18	1582.92	-1.72948	2032.5	334.14	1582.92	4.45519	2032.5	32.8218	2032.5	0	1867.31	22.7998	2032.5	288.153
2034	172.25	1583.97	0	2034	115.153	1583.97	5.16031	2034	35.1592	2034	70.7539	1868.31	22.9755	2034	27.0439
2035.5	292.268	1585.01	7.14431	2035.5	155.219	1585.01	5.5315	2035.5	252.93	2035.5	160.83	1869.31	24.2127	2035.5	272.448
2037	372.397	1586.06	3.31453	2037	235.501	1586.06	6.34706	2037	259.79	2037	35.5644	1870.31	26.4725	2037	374.885
2038.5	244.944	1587.1	10.0588	2038.5	303.506	1587.1	7.99439	2038.5	158.155	2038.5	89.3154	1871.31	29.5161	2038.5	204.453
2040	65.3371	1588.15	9.56906	2040	161.139	1588.15	10.0231	2040	25.6685	2040	124.207	1872.32	32.954	2040	0
2041.5	0	1589.19	24.8334	2041.5	0	1589.19	11.3485	2041.5	0	2041.5	32.9585	1873.32	36.3198	2041.5	14.7319
2043	214.294	1590.23	-9.22232	2043	274.594	1590.23	10.9566	2043	216.607	2043	83.1162	1874.32	39.1502	2043	249.436
2044.5	311.803	1591.28	17.0879	2044.5	521.528	1591.28	8.76128	2044.5	291.728	2044.5	92.2164	1875.31	41.0576	2044.5	325.903
2046	61.8659	1592.32	13.2922	2046	304.942	1592.32	5.94439	2046	100.095	2046	0	1876.32	41.7829	2046	29.7673
2047.5	0	1593.36	16.2965	2047.5	0	1593.36	4.39382	2047.5	62.7385	2047.5	21.6729	1877.32	41.2244	2047.5	63.3594
2049	277.424	1594.4	-22.6892	2049	157.963	1594.4	5.55805	2049	202.24	2049	115.326	1878.31	39.4397	2049	188.981
2050.5	412.931	1595.45	-1.31895	2050.5	302.95	1595.45	9.40271	2050.5	216.604	2050.5	136.598	1879.31	36.6293	2050.5	0
2052	246.946	1596.49	32.6154	2052	125.022	1596.49	14.2776	2052	80.0074	2052	72.5857	1880.31	33.1064	2052	27.2696
2053.5	113.262	1597.53	9.88967	2053.5	52.9188	1597.53	17.8291	2053.5	33.978	2053.5	28.3112	1881.31	29.258	2053.5	176.763
2055	131.837	1598.57	38.634	2055	136.678	1598.57	18.4729	2055	35.519	2055	53.2831	1882.31	25.5022	2055	190.52
2056.5	202.284	1599.62	28.5442	2056.5	203.453	1599.62	16.384	2056.5	12.0254	2056.5	66.7268	1883.31	22.2411	2056.5	107.945
2058	364.967	1600.66	-6.45149	2058	254.784	1600.66	13.3614	2058	136.168	2058	13.0429	1884.31	19.811	2058	45.2568
2059.5	256.22	1601.7	2.55282	2059.5	173.741	1601.7	11.607	2059.5	242.599	2059.5	76.4973	1885.31	18.4315	2059.5	35.5776
2061	0	1602.74	-0.702864	2061	4.76993	1602.74	12.3373	2061	161.762	2061	148.397	1886.3	18.1586	2061	34.0524
2062.5	78.1004	1603.78	38.0314	2062.5	0	1603.78	15.1237	2062.5	0	2062.5	0	1887.3	18.8533	2062.5	70.2217
2064	214.262	1604.82	14.9058	2064	98.6493	1604.82	18.3621	2064	14.0105	2064	5.11314	1888.3	20.1762	2064	106.942
2065.5	226.326	1605.86	20.5801	2065.5	149.583	1605.86	20.425	2065.5	52.516	2065.5	101.858	1889.3	21.6194	2065.5	107.359
2067	162.39	1606.9	35.7244	2067	101.872	1606.9	20.6152	2067	7.77924	2067	51.1502	1890.3	22.5801	2067	148.042
2068.5	49.9797	1607.94	-4.47131	2068.5	87.1894	1607.94	19.2977	2068.5	86.7045	2068.5	72.6379	1891.29	22.4692	2068.5	97.0327
2070	0	1608.98	24.403	2070	12.3314	1608.98	17.2833	2070	21.4487	2070	49.7775	1892.29	20.8393	2070	0
2071.5	241.295	1610.02	24.6173	2071.5	86.0917	1610.02	15.0968	2071.5	0	2071.5	0	1893.29	17.504	2071.5	186.508
2073	103.823	1611.06	2.55163	2073	52.2614	1611.06	12.7449	2073	58.5574	2073	24.7809	1894.29	12.6191	2073	245.803
2074.5	74.5509	1612.1	17.0259	2074.5	31.9759	1612.1	10.0755	2074.5	109.585	2074.5	40.9303	1895.28	6.69881	2074.5	45.0275
2076	320.507	1613.14	12.4302	2076	153.476	1613.14	7.27489	2076	206.926	2076	55.9006	1896.28	0.553102	2076	0
2077.5	89.4643	1614.18	-6.69544	2077.5	57.9671	1614.18	4.95676	2077.5	134.469	2077.5	25.6677	1897.28	-4.8476	2077.5	77.7705
2079	56.6756	1615.22	7.64887	2079	0	1615.22	3.71265	2079	0	2079	6.36413	1898.27	-8.55826	2079	248.618
2080.5	325.864	1616.26	-2.54682	2080.5	186.627	1616.26	3.53384	2080.5	125.012	2080.5	96.8931	1899.27	-9.85497	2080.5	401.317
2082	264.609	1617.3	-1.93251	2082	281.204	1617.3	3.67667	2082	351.262	2082	195.445	1900.26	-8.39367	2082	228.247
2083.5	158.391	1618.34	22.0018	2083.5	115.386	1618.34	3.17955	2083.5	285.883	2083.5	149.791	1901.26	-4.29399	2083.5	0
2085	234.207	1619.38	1.14611	2085	101.033	1619.38	1.65659	2085	239.093	2085	127.743	1902.26	1.87821	2085	23.5813
2086.5	261.05	1620.42	-8.51957	2086.5	300.498	1620.42	-0.295016	2086.5	253.986	2086.5	164.79	1903.25	9.22657	2086.5	167.8
2088	170.596	1621.46	-0.175263	2088	462.13	1621.46	-1.46422	2088	149.784	2088	59.8094	1904.25	16.713	2088	206.139
2089.5	125.616	1622.49	-5.79686	2089.5	346.74	1622.49	-0.934732	2089.5	240.005	2089.5	0	1905.24	23.3752	2089.5	87.4923
2091	0	1623.53	-7.99255	2091	0	1623.53	1.13671	2091	224.833	2091	9.65755	1906.24	28.5171	2091	0
2092.5	63.9859	1624.57	17.6818	2092.5	0	1624.57	3.54036	2092.5	0	2092.5	54.8554	1907.23	31.8287	2092.5	190.191
2094	151.21	1625.61	1.35608	2094	121.607	1625.61	4.78356	2094	99.1509	2094	83.5939	1908.23	33.4042	2094	353.545
2095.5	0	1626.65	7.83039	2095.5	69.8044	1626.65	4.09975	2095.5	118.865	2095.5	27.8082	1909.22	33.6601	2095.5	126.577
2097	18.5657	1627.68	20.5988	2097	128.93	1627.68	1.9423	2097	0	2097	19.615	1910.22	33.1775	2097	0
2098.5	40.587	1628.72	-25.1869	2098.5	170.868	1628.72	-0.39474	2098.5	88.2925	2098.5	16.161	1911.21	32.5159	2098.5	61.0846
2100	0	1629.76	-10.5826	2100	108.65	1629.76	-1.67129	2100	254.662	2100	30.5235	1912.21	32.0493	2100	157.826
2101.5	107.362	1630.8	14.8217	2101.5	102.181	1630.8	-1.51345	2101.5	322.178	2101.5	91.3602	1913.2	31.8709	2101.5	58.8714
2103	267.923	1631.83	-4.79987	2103	187.717	1631.83	-0.533356	2103	181.27	2103	75.8653	1914.19	31.7886	2103	0
2104.5	168.513	1632.87	-5.92556	2104.5	188.942	1632.87	0.223965	2104.5	113.151	2104.5	41.3603	1915.19	31.4104	2104.5	90.932
2106	0	1633.91	20.1488	2106	102.386	1633.91	0.112492	2106	128.311	2106	34.0622	1916.18	30.2908	2106	148.404
2107.5	0	1634.94	-7.08284	2107.5	0	1634.94	-0.65852	2107.5	0	2107.5	0	1917.18	28.0927	2107.5	31.8069
2109	50.0129	1635.98	-15.6685	2109	100.002	1635.98	-1.1912	2109	20.8352	2109	19.6947	1918.17	24.7181	2109	0
2110.5	140.715	1637.01	1.89987	2110.5	353.06	1637.01	-0.484887	2110.5	208.167	2110.5	64.5213	1919.16	20.3683	2110.5	170.452
2112	104.288	1638.05	0.774182	2112	393.185	1638.05	1.89605	2112	257.925	2112	13.4667	1920.16	15.5183	2112	109.958
2113.5	270.275	1639.09	11.7885	2113.5	304.642	1639.09	5.58376	2113.5	267.393	2113.5	17.6436	1921.15	10.8128	2113.5	0
2115	221.271	1640.12	9.2269	2115	86.9783	1640.12	9.60133	2115	295.854	2115	34.3263	1922.14	6.91409	2115	26.1162
2116.5	209.332	1641.16	16.3612	2116.5	0	1641.16	12.8433	2116.5	395.284	2116.5	29.4045	1923.13	4.34511	2116.5	0
2118	656.691	1642.19	2.73961	2118	174.656	1642.19	14.5737	2118	431.52	2118	33.7054	1924.13	3.36983	2118	73.9606
2119.5	468.838	1643.23	24.2839	2119.5	165.768	1643.23	14.6095	2119.5	319.976	2119.5	49.7106	1925.12	3.94075	2119.5	155.003
2121	0	1644.26	16.9223	2121	121.402	1644.26	13.2674	2121	114.639	2121	59.6294	1926.11	5.72281	2121	25.0569
2122.5	131.8	1645.3	11.5266	2122.5	322.84	1645.3	11.0587	2122.5	0	2122.5	56.3785	1927.1	8.18388	2122.5	45.6302
2124	187.679	1646.33	17.775	2124	212.93	1646.33	8.44591	2124	33.1595	2124	66.796	1928.09	10.7218	2124	96.9648
2125.5	110.731	1647.37	-17.2206	2125.5	0	1647.37	5.67641	2125.5	72.0815	2125.5	41.0224	1929.09	12.7931	2125.5	0
2127	160.162	1648.4	10.6178	2127	9.13849	1648.4	2.8676	2127	74.4147	2127	0	1930.08	14.0108	2127	29.5435
2128.5	259.912	1649.43	6.19616	2128.5	228.113	1649.43	0.146371	2128.5	167.778	2128.5	26.6491	1931.07	14.1909	2128.5	340.609
2130	411.316	1650.47	-4.26952	2130	368.511	1650.47	-2.19819	2130	254.778	2130	76.388	1932.06	13.3441	2130	586.579
2131.5	263.052	1651.5	0.50888	2131.5	154.127	1651.5	-3.71578	2131.5	107.606	2131.5	42.4973	1933.05	11.6257	2131.5	308.104
2133	89.2198	1652.54	-12.8868	2133	0	1652.54	-4.01233	2133	5.05225	2133	47.15	1934.04	9.26388	2133	146.392
2134.5	0	1653.57	-8.3784	2134.5	63.2764	1653.57	-2.97137	2134.5	38.8535	2134.5	57.6784	1935.03	6.49355	2134.5	184.875
2136	37.6467	1654.6	0	2136	246.499	1654.6	-0.921827	2136	201.043	2136	97.8539	1936.02	3.51087	2136	136.371
2137.5	233.545	1655.64	10.6073	2137.5	304.935	1655.64	1.47094	2137.5	338.052	2137.5	196.004	1937.01	0.458423	2137.5	176.862
2139	221.612	1656.67	-2.88884	2139	69.6907	1656.67	3.51393	2139	175.167	2139	215.508	1938	-2.56432	2139	137.631
2140.5	67.6788	1657.7	8.15507	2140.5	0	1657.7	4.7758	2140.5	0	2140.5	97.7246	1938.99	-5.4778	2140.5	0
2142	117.465	1658.73	7.19898	2142	183.403	1658.73	5.23083	2142	49.9097	2142	0	1939.98	-8.20172	2142	45.2808
2143.5	298.964	1659.77	11.5462	2143.5	183.663	1659.77	5.11946	2143.5	142.556	2143.5	75.2332	1940.97	-10.6491	2143.5	356.771
2145	541.332	1660.8	-6.34985	2145	166.359	1660.8	4.68817	2145	166.411	2145	207.449	1941.96	-12.7389	2145	502.967
2146.5	705.416	1661.83	-0.765942	2146.5	93.589	1661.83	3.95734	2146.5	80.5991	2146.5	249.221	1942.95	-14.4225	2146.5	224.971
2148	908.524	1662.86	2.67797	2148	0	1662.86	2.74704	2148	58.1456	2148	208.578	1943.94	-15.7113	2148	323.405
2149.5	1256.45	1663.89	29.3119	2149.5	54.641	1663.89	0.870316	2149.5	230.096	2149.5	189.238	1944.93	-16.6927	2149.5	676.371
2151	1496.95	1664.93	-9.28087	2151	239.803	1664.93	-1.6641	2151	298.17	2151	197.718	1945.92	-17.5232	2151	893.55
2152.5	1762.36	1665.96	-30.097	2152.5	455.706	1665.96	-4.60078	2152.5	307.994	2152.5	226.255	1946.91	-18.3948	2152.5	1113.67
2154	2270.01	1666.99	4.94695	2154	480.076	1666.99	-7.64027	2154	508.051	2154	226.621	1947.9	-19.484	2154	1382.55
2155.5	2803.39	1668.02	-9.74913	2155.5	466.01	1668.02	-10.6834	2155.5	589.421	2155.5	270.655	1948.89	-20.893	2155.5	1620.42
2157	3178.23	1669.05	-12.7052	2157	534.281	1669.05	-13.9777	2157	576.198	2157	306.399	1949.88	-22.6041	2157	1741.8
2158.5	3383.06	1670.08	-0.861312	2158.5	619.817	1670.08	-18.0167	2158.5	635.74	2158.5	209.448	1950.87	-24.4596	2158.5	1872.57
2160	3805.57	1671.11	-40.7474	2160	692.43	1671.11	-23.2356	2160	684.493	2160	193.25	1951.85	-26.1757	2160	2042.53
2161.5	4206.67	1672.14	-34.1035	2161.5	714.598	1672.14	-29.6675	2161.5	814.367	2161.5	265.327	1952.84	-27.3902	2161.5	2238.92
2163	4444.19	1673.17	-28.3996	2163	696.107	1673.17	-36.7523	2163	934.925	2163	308.635	1953.83	-27.7316	2163	2495.87
2164.5	4866.42	1674.2	-34.6857	2164.5	753.249	1674.2	-43.4088	2164.5	800.42	2164.5	330.534	1954.82	-26.8952	2164.5	2667.27
2166	4926.53	1675.23	-60.7118	2166	711.267	1675.23	-48.366	2166	708.106	2166	409.249	1955.8	-24.7072	2166	2814.68
2167.5	4880.97	1676.26	-53.1278	2167.5	644.889	1676.26	-50.6407	2167.5	755.912	2167.5	481.142	1956.79	-21.1644	2167.5	3130.56
2169	5209.37	1677.29	-60.0939	2169	638.985	1677.29	-49.984	2169	738.202	2169	391.907	1957.78	-16.4389	2169	3247.39
2170.5	5261.59	1678.32	-35.18	2170.5	441.242	1678.32	-47.1011	2170.5	662.244	2170.5	340.265	1958.77	-10.8529	2170.5	3205.54
2172	5407.14	1679.35	-60.1361	2172	290.07	1679.35	-43.4965	2172	659.04	2172	366.291	1959.75	-4.82712	2172	3210.21
2173.5	5966.82	1680.38	-23.6222	2173.5	263.057	1680.38	-40.9348	2173.5	665.057	2173.5	367.26	1960.74	1.18261	2173.5	3105.51
2175	6615.36	1681.41	-27.1183	2175	65.4036	1681.41	-40.7005	2175	491.076	2175	333.489	1961.73	6.75022	2175	2889.59
2176.5	7604.83	1682.44	-72.6044	2176.5	0	1682.44	-42.9946	2176.5	443.063	2176.5	369.533	1962.71	11.5335	2176.5	2688.95
2178	9344.53	1683.47	-16.6305	2178	144.088	1683.47	-46.8045	2178	649.735	2178	454.001	1963.7	15.3113	2178	2653.45
2179.5	12063	1684.5	-50.3866	2179.5	215.188	1684.5	-50.3661	2179.5	812.555	2179.5	403.013	1964.69	18.0017	2179.5	2802.68
2181	16505	1685.53	-90.6726	2181	391.514	1685.53	-52.0077	2181	873.904	2181	390.637	1965.67	19.6596	2181	2997.21
2182.5	23327.8	1686.55	-32.7921	2182.5	756.611	1686.55	-50.918	2182.5	1037.6	2182.5	432.764	1966.66	20.4561	2182.5	3213.96
2184	32257.6	1687.58	-48.8182	2184	1271.57	1687.58	-47.427	2184	1444.86	2184	480.575	1967.64	20.6438	2184	3801.4
2185.5	41910	1688.61	-27.5042	2185.5	1996.77	1688.61	-42.6093	2185.5	2076.77	2185.5	696.164	1968.63	20.5091	2185.5	4774.65
2187	50476.4	1689.64	-60.4603	2187	2845.08	1689.64	-37.5523	2187	2716.84	2187	907.844	1969.61	20.3187	2187	6095.95
2188.5	56942.4	1690.67	-28.6164	2188.5	3824.24	1690.67	-32.7157	2188.5	3399.54	2188.5	1038.34	1970.6	20.2642	2188.5	7770.38
2190	61586.3	1691.69	-19.5358	2190	5074.99	1691.69	-27.7868	2190	4405.66	2190	1269.41	1971.59	20.417	2190	9537.77
2191.5	65759.7	1692.72	-24.0919	2191.5	6704.32	1692.72	-22.087	2191.5	5865.53	2191.5	1689.81	1972.57	20.6995	2191.5	11707.7
2193	70243.1	1693.75	-17.718	2193	9179.2	1693.75	-15.1528	2193	7943.22	2193	2199.46	1973.56	20.883	2193	14690.6
2194.5	76216.8	1694.77	-13.8375	2194.5	12977.6	1694.77	-7.14419	2194.5	10777	2194.5	2758.13	1974.54	20.6181	2194.5	18236.3
2196	85758.7	1695.8	2.13646	2196	18510.3	1695.8	1.18308	2196	14646.1	2196	3690.13	1975.53	19.4947	2196	22488.9
2197.5	98419.2	1696.83	9.98037	2197.5	26344	1696.83	8.87529	2197.5	20141.9	2197.5	5044.07	1976.51	17.1253	2197.5	27998.3
2199	113720	1697.85	29.3309	2199	37601.9	1697.85	15.1548	2199	27655.8	2199	6930.72	1977.49	13.2346	2199	35545.9
2200.5	131045	1698.88	13.0349	2200.5	52761.6	1698.88	19.5339	2200.5	36637.4	2200.5	9344.17	1978.48	7.7377	2200.5	45850.9
2202	149441	1699.91	26.4788	2202	70917.5	1699.91	21.6861	2202	46086.1	2202	11917.1	1979.46	0.786579	2202	59502.3
2203.5	164829	1700.93	20.7593	2203.5	90488.6	1700.93	21.2243	2203.5	55119.2	2203.5	14535.2	1980.45	-7.22849	2203.5	76882
2205	173243	1701.96	16.6032	2205	108334	1701.96	17.691	2205	62355.3	2205	16839.8	1981.43	-15.7265	2205	97764.8
2206.5	174497	1702.99	8.44716	2206.5	120894	1702.99	10.8724	2206.5	66461.5	2206.5	18137.1	1982.41	-24.0275	2206.5	119652
2208	169510	1704.01	30.1977	2208	127758	1704.01	1.1718	2208	67187.5	2208	18651.8	1983.4	-31.4691	2208	139360
2209.5	157365	1705.04	-11.5584	2209.5	127942	1705.04	-10.2432	2209.5	64698.5	2209.5	18532	1984.38	-37.5248	2209.5	153956
2211	138138	1706.06	-50.4778	2211	120597	1706.06	-21.6861	2211	59472.2	2211	17577.2	1985.36	-41.8997	2211	160750
2212.5	117624	1707.09	-26.7739	2212.5	108071	1707.09	-31.6038	2212.5	52428.2	2212.5	15820.1	1986.35	-44.5796	2212.5	158815
2214	98124.2	1708.11	-41.6933	2214	93774.3	1708.11	-39.1646	2214	44899.5	2214	13757.8	1987.33	-45.8258	2214	148764
2215.5	80224.9	1709.14	-40.6494	2215.5	79778.8	1709.14	-44.5293	2215.5	37919.5	2215.5	11882.3	1988.31	-46.115	2215.5	132353
2217	65252.2	1710.16	-35.0388	2217	66462.2	1710.16	-48.5221	2217	31975.4	2217	10313.6	1989.29	-46.037	2217	113522
2218.5	54083.6	1711.19	-68.3949	2218.5	54962.5	1711.19	-52.0206	2218.5	26953.1	2218.5	8928.06	1990.28	-46.1734	2218.5	95229.4
2220	46235.6	1712.21	-63.0443	2220	45745.2	1712.21	-55.3565	2220	22806.4	2220	7688	1991.26	-46.9817	2220	78537.2
2221.5	40545.1	1713.23	-47.0338	2221.5	38628.8	1713.23	-58.2218	2221.5	19605.2	2221.5	6720.85	1992.24	-48.7084	2221.5	64171.5
2223	36049.2	1714.26	-57.8498	2223	33179.4	1714.26	-60.043	2223	17041.6	2223	5997.83	1993.22	-51.3473	2223	52475.9
2224.5	32656.7	1715.28	-71.8393	2224.5	29000.5	1715.28	-60.5652	2224.5	14881.3	2224.5	5328.57	1994.2	-54.6488	2224.5	43139.4
2226	29606.4	1716.31	-53.4654	2226	25318.5	1716.31	-60.2256	2226	12815.1	2226	4585.32	1995.18	-58.1758	2226	35328.3
2227.5	26234	1717.33	-63.3148	2227.5	21785	1717.33	-59.9216	2227.5	10944.5	2227.5	3980.86	1996.17	-61.3925	2227.5	29263.3
2229	23449	1718.35	-59.3042	2229	19089.2	1718.35	-60.4003	2229	9521.56	2229	3393.61	1997.15	-63.7671	2229	24874.3
2230.5	20730.3	1719.38	-63.4603	2230.5	16847.9	1719.38	-61.6301	2230.5	8244.58	2230.5	2791.07	1998.13	-64.87	2230.5	21557
2232	17772	1720.4	-45.8497	2232	14621.3	1720.4	-62.697	2232	7030.9	2232	2368.02	1999.11	-64.4467	2232	18877.4
2233.5	15488.2	1721.42	-81.5692	2233.5	12628.4	1721.42	-62.4249	2233.5	6110.14	2233.5	2063.91	2000.09	-62.458	2233.5	16739.3
2235	13767.6	1722.44	-64.0886	2235	11068.2	1722.44	-60.2982	2235	5266.2	2235	1829.45	2001.07	-59.0788	2235	14873.3
2236.5	12144.4	1723.47	-57.5747	2236.5	9687.67	1723.47	-57.0899	2236.5	4492.51	2236.5	1624.15	2002.05	-54.6619	2236.5	12762.9
2238	10186.6	1724.49	-43.2941	2238	7899.76	1724.49	-54.6269	2238	3806.88	2238	1358.09	2003.03	-49.6723	2238	10738.8
2239.5	8423.43	1725.51	-58.2135	2239.5	6153.87	1725.51	-54.7848	2239.5	2925.12	2239.5	1165.14	2004.01	-44.6072	2239.5	8768.58
2241	6962.07	1726.53	-46.333	2241	4884.43	1726.53	-58.2478	2241	2183.79	2241	1004.51	2004.99	-39.9147	2241	6757.62
2242.5	5447.47	1727.56	-61.2891	2242.5	3944.96	1727.56	-63.9285	2242.5	1732.79	2242.5	748.259	2005.97	-35.926	2242.5	5305.15
2244	4014.75	1728.58	-76.2085	2244	2969.09	1728.58	-69.4601	2244	1287.45	2244	572.924	2006.95	-32.8117	2244	4005.92
2245.5	3458.61	1729.6	-82.8679	2245.5	2142.9	1729.6	-72.5681	2245.5	1058.74	2245.5	448.094	2007.93	-30.569	2245.5	2836.14
2247	3775.53	1730.62	-82.0573	2247	1889.3	1730.62	-72.3922	2247	1058.9	2247	403.83	2008.91	-29.0399	2247	2380.6
2248.5	3837.25	1731.64	-50.3068	2248.5	1889.97	1731.64	-69.9447	2248.5	800.487	2248.5	386.315	2009.89	-27.9564	2248.5	2060.17
2250	4146.86	1732.66	-90.0262	2250	1785.56	1732.66	-67.3835	2250	771.959	2250	385.801	2010.87	-27.0022	2250	1842.29
2251.5	4572.55	1733.68	-54.2756	2251.5	2010.31	1733.68	-66.5968	2251.5	1131.26	2251.5	459.604	2011.85	-25.8776	2251.5	1906.31
2253	4756.84	1734.7	-36.395	2253	2532.68	1734.7	-68.0476	2253	1465	2253	500.242	2012.83	-24.3563	2253	1962.91
2254.5	5335.07	1735.72	-86.6545	2254.5	3116.89	1735.72	-70.6242	2254.5	1703.73	2254.5	495.887	2013.81	-22.3196	2254.5	1960.45
2256	5668.22	1736.74	-99.1739	2256	3583.75	1736.74	-72.5316	2256	2020.11	2256	637.117	2014.78	-19.7648	2256	2188.64
2257.5	5760.95	1737.77	-67.06	2257.5	4056.32	1737.77	-72.5527	2257.5	2338.58	2257.5	823.489	2015.76	-16.7862	2257.5	2808.2
2259	6025.81	1738.79	-68.5194	2259	4685.67	1738.79	-70.7681	2259	2585.32	2259	864.303	2016.74	-13.5343	2259	3157.12
2260.5	6359.86	1739.81	-67.1688	2260.5	5301.17	1739.81	-68.3275	2260.5	2955.26	2260.5	976.426	2017.72	-10.166	2260.5	3308.83
2262	6293.45	1740.83	-37.0183	2262	5706.54	1740.83	-66.4499	2262	3191.65	2262	1101.05	2018.7	-6.7985	2262	3540.87
2263.5	5788.75	1741.84	-91.241	2263.5	5976.46	1741.84	-65.4705	2263.5	3215.76	2263.5	1140.13	2019.67	-3.47831	2263.5	3767.03
2265	5298.98	1742.86	-67.7605	2265	6303.21	1742.86	-64.6291	2265	3251.55	2265	1139.08	2020.65	-0.176428	2265	3719.25
2266.5	4799.29	1743.88	-70.1399	2266.5	6264.73	1743.88	-62.6803	2266.5	3176.14	2266.5	1053.15	2021.63	3.19212	2266.5	3522.71
2268	4213.62	1744.9	-55.3293	2268	5727.87	1744.9	-58.9182	2268	2688.82	2268	945.243	2022.61	6.72629	2268	3382.26
2269.5	3814.07	1745.92	-41.9887	2269.5	5052.54	1745.92	-53.8132	2269.5	2076.88	2269.5	861.846	2023.58	10.4878	2269.5	3122.63
2271	3658.44	1746.94	-49.0382	2271	4475.57	1746.94	-48.8277	2271	1907.11	2271	621.3	2024.56	14.4533	2271	2950.6
2272.5	3128.14	1747.96	-49.8276	2272.5	3566.36	1747.96	-45.5289	2272.5	1558.96	2272.5	512.384	2025.54	18.4862	2272.5	2797.25
2274	2155.99	1748.98	-49.007	2274	2322.7	1748.98	-44.5889	2274	931.608	2274	482.722	2026.52	22.3358	2274	2385.6
2275.5	1424.08	1750	-36.4665	2275.5	1353.44	1750	-45.3112	2275.5	595.875	2275.5	316.231	2027.49	25.6681	2275.5	2047.62
2277	926.43	1751.01	-44.6792	2277	787.816	1751.01	-45.9564	2277	517.292	2277	190.583	2028.47	28.1254	2277	1720.56
2278.5	597.436	1752.03	-48.2686	2278.5	539.919	1752.03	-44.6697	2278.5	384.386	2278.5	141.656	2029.45	29.4017	2278.5	1292.53
2280	420.824	1753.05	-41.4581	2280	457.522	1753.05	-40.4132	2280	222.065	2280	136.022	2030.42	29.3194	2280	934.626
2281.5	162.908	1754.07	-50.6375	2281.5	247.514	1754.07	-33.4833	2281.5	136.817	2281.5	97.1291	2031.4	27.8877	2281.5	680.912
2283	0	1755.09	-21.1569	2283	48.9989	1755.09	-25.3496	2283	25.4383	2283	78.0079	2032.37	25.3305	2283	440.233
2284.5	0	1756.1	-15.7797	2284.5	0	1756.1	-17.9851	2284.5	0	2284.5	58.9517	2033.35	22.0721	2284.5	163.067
2286	0	1757.12	6.24087	2286	0	1757.12	-13.0691	2286	30.4619	2286	0	2034.32	18.6808	2286	0
2287.5	0	1758.14	-6.41855	2287.5	21.0435	1758.14	-11.3644	2287.5	107.874	2287.5	29.141	2035.3	15.7774	2287.5	37.0753
2289	77.1145	1759.16	-23.608	2289	35.0231	1759.16	-12.5643	2289	0.2489	2289	49.9694	2036.28	13.9251	2289	109.273
2290.5	78.2156	1760.17	-17.4207	2290.5	109.561	1760.17	-15.5537	2290.5	0	2290.5	43.7176	2037.25	13.5199	2290.5	0
2292	0	1761.19	-22.3402	2292	322.874	1761.19	-18.9675	2292	270.009	2292	70.3272	2038.23	14.7052	2292	135.613
2293.5	192.758	1762.2	-12.8229	2293.5	439.325	1762.2	-21.7157	2293.5	223.581	2293.5	30.935	2039.2	17.328	2293.5	273.055
2295	249.788	1763.22	-25.8724	2295	333.773	1763.22	-23.3297	2295	121.425	2295	73.0062	2040.18	20.9492	2295	169.081
2296.5	71.6929	1764.24	-24.9318	2296.5	203.518	1764.24	-23.8865	2296.5	200.829	2296.5	186.485	2041.15	24.9103	2296.5	93.4174
2298	60.8248	1765.25	-24.6146	2298	305.668	1765.25	-23.6897	2298	311.197	2298	141.548	2042.12	28.4445	2298	40.822
2299.5	137.285	1766.27	-25.804	2299.5	326.925	1766.27	-22.918	2299.5	220.256	2299.5	98.2499	2043.1	30.8153	2299.5	0
2301	90.8315	1767.29	-27.7834	2301	261.98	1767.29	-21.4823	2301	157.897	2301	100.171	2044.07	31.456	2301	0
2302.5	135.849	1768.3	-14.4062	2302.5	266.651	1768.3	-19.272	2302.5	321.224	2302.5	126.399	2045.05	30.0791	2302.5	27.0635
2304	167.118	1769.32	-8.12561	2304	37.9213	1769.32	-16.5876	2304	219.648	2304	66.6375	2046.02	26.7371	2304	0
2305.5	82.9083	1770.33	-21.4084	2305.5	6.44385	1770.33	-14.3585	2305.5	76.3973	2305.5	53.8092	2046.99	21.8154	2305.5	0
2307	133.304	1771.35	-7.25781	2307	244.515	1771.35	-13.9532	2307	149.359	2307	122.904	2047.97	15.9604	2307	65.4194
2308.5	60.7637	1772.36	-28.2706	2308.5	160.403	1772.36	-16.4716	2308.5	108.631	2308.5	56.4841	2048.94	9.9557	2308.5	104.196
2310	157.898	1773.38	0	2310	0	1773.38	-22.0325	2310	0	2310	0	2049.91	4.56868	2310	163.736
2311.5	127.492	1774.39	-34.9993	2311.5	11.5405	1774.39	-29.4436	2311.5	0	2311.5	14.9554	2050.89	0.40367	2311.5	220.789
2313	0	1775.41	-32.6814	2313	75.2592	1775.41	-36.6757	2313	76.7039	2313	55.2023	2051.86	-2.2095	2313	140.259
2314.5	130.531	1776.42	-48.8807	2314.5	36.5586	1776.42	-41.8222	2314.5	155.302	2314.5	64.84	2052.83	-3.2677	2314.5	205.801
2316	58.398	1777.43	-58.82	2316	123.644	1777.43	-44.0911	2316	104.764	2316	6.57199	2053.8	-3.07484	2316	339.39
2317.5	0	1778.45	-47.032	2317.5	254.798	1778.45	-44.1269	2317.5	75.9904	2317.5	0	2054.78	-2.15708	2317.5	360
2319	0	1779.46	-34.0413	2319	178.47	1779.46	-43.4997	2319	55.2236	2319	65.7144	2055.75	-1.13133	2319	334.8
2320.5	21.9066	1780.48	-32.6534	2320.5	0	1780.48	-43.7457	2320.5	0	2320.5	91.9764	2056.72	-0.558703	2320.5	283.614
2322	111.238	1781.49	-43.5227	2322	127.667	1781.49	-45.501	2322	55.2335	2322	77.6936	2057.69	-0.814102	2322	216.928
2323.5	131.555	1782.5	-55.192	2323.5	227.03	1782.5	-48.3481	2323.5	94.9706	2323.5	47.2367	2058.67	-2.00217	2323.5	177.795
2325	32.3811	1783.52	-57.144	2325	50.6383	1783.52	-51.2865	2325	36.9966	2325	25.0242	2059.64	-3.93621	2325	214.428
2326.5	29.3616	1784.53	-51.2133	2326.5	31.916	1784.53	-53.4322	2326.5	62.6755	2326.5	28.7723	2060.61	-6.18468	2326.5	137.96
2328	139.28	1785.54	-62.6126	2328	0	1785.54	-54.4637	2328	58.6676	2328	46.5184	2061.58	-8.17136	2328	0
2329.5	112.438	1786.55	-51.8819	2329.5	0	1786.55	-54.5244	2329.5	21.855	2329.5	51.9295	2062.55	-9.30728	2329.5	3.53662
2331	0	1787.57	-32.374	2331	117.274	1787.57	-53.8628	2331	60.7321	2331	68.1974	2063.52	-9.12444	2331	116.734
2332.5	61.9822	1788.58	-66.5733	2332.5	0	1788.58	-52.5649	2332.5	42.5953	2332.5	91.399	2064.49	-7.38314	2332.5	198.944
2334	229.114	1789.59	-68.1126	2334	50.765	1789.59	-50.6615	2334	62.9863	2334	94.763	2065.47	-4.13154	2334	170.746
2335.5	410.176	1790.6	-35.3819	2335.5	226.808	1790.6	-48.3784	2335.5	146.073	2335.5	93.9072	2066.44	0.293644	2335.5	73.9003
2337	260.042	1791.62	-52.7939	2337	0	1791.62	-46.2352	2337	41.8501	2337	53.057	2067.41	5.32193	2337	51.8628
2338.5	0	1792.63	-33.1332	2338.5	8.02332	1792.63	-44.7429	2338.5	0	2338.5	48.674	2068.38	10.2488	2338.5	24.7897
2340	58.5603	1793.64	-38.0025	2340	154.155	1793.64	-43.946	2340	182.879	2340	60.9354	2069.35	14.3586	2340	0
2341.5	126.415	1794.65	-47.0018	2341.5	53.6682	1794.65	-43.1763	2341.5	255.739	2341.5	0	2070.32	17.0484	2341.5	138.58
2343	75.1401	1795.66	-58.8111	2343	0	1795.66	-41.3972	2343	111.227	2343	0	2071.29	17.9303	2343	127.693
2344.5	132.935	1796.67	-26.8804	2344.5	88.2533	1796.67	-37.9808	2344.5	140.831	2344.5	68.0157	2072.26	16.8958	2344.5	91.099
2346	229.945	1797.68	-56.4097	2346	214.891	1797.68	-33.3746	2346	163.11	2346	137.599	2073.23	14.1321	2346	198.118
2347.5	229.904	1798.7	4.43823	2347.5	206.672	1798.7	-29.1076	2347.5	29.5574	2347.5	116.133	2074.2	10.0885	2347.5	81.1995
2349	244.325	1799.71	-32.5611	2349	134.846	1799.71	-27.0031	2349	19.1116	2349	38.9636	2075.17	5.40004	2349	95.9073
2350.5	136.506	1800.72	-23.1704	2350.5	84.0201	1800.72	-28.1266	2350.5	10.8771	2350.5	82.9535	2076.14	0.780065	2350.5	167.46
2352	0	1801.73	-39.2397	2352	0	1801.73	-32.1006	2352	0	2352	133.976	2077.1	-3.09867	2352	0
2353.5	168.389	1802.74	-34.639	2353.5	53.4263	1802.74	-37.2842	2353.5	129.133	2353.5	118.649	2078.07	-5.7157	2353.5	0
2355	296.031	1803.75	-40.3083	2355	172.495	1803.75	-41.6375	2355	111.68	2355	125.79	2079.04	-6.7857	2355	223.7
2356.5	264.057	1804.76	-49.1776	2356.5	221.332	1804.76	-43.6775	2356.5	138.916	2356.5	64.4758	2080.01	-6.29942	2356.5	291.583
2358	137.443	1805.77	-50.5868	2358	190.143	1805.77	-42.9601	2358	141.077	2358	4.29143	2080.98	-4.51287	2358	0
2359.5	114.657	1806.78	-32.9161	2359.5	172.623	1806.78	-39.9502	2359.5	54.8992	2359.5	77.2045	2081.95	-1.88677	2359.5	108.229
2361	212.842	1807.79	-45.5254	2361	128.84	1807.79	-35.5946	2361	83.4437	2361	121.352	2082.92	1.01246	2361	165.352
2362.5	80.205	1808.79	-31.712	2362.5	17.6785	1808.79	-30.9954	2362.5	21.4182	2362.5	124.516	2083.88	3.63036	2362.5	0
2364	0	1809.8	-0.32127	2364	109.532	1809.8	-27.3336	2364	0	2364	118.508	2084.85	5.53561	2364	188.847
2365.5	95.1781	1810.81	-38.7906	2365.5	323.588	1810.81	-25.7552	2365.5	97.3611	2365.5	49.2326	2085.82	6.5021	2365.5	238.053
2367	96.6599	1811.82	-48.7199	2367	191.66	1811.82	-27.034	2367	170.373	2367	42.606	2086.79	6.54203	2367	123.271
2368.5	23.6916	1812.83	-0.38916	2368.5	0	1812.83	-31.0011	2368.5	147.861	2368.5	55.1722	2087.75	5.88457	2368.5	87.4852
2370	111.777	1813.84	-31.5285	2370	65.6583	1813.84	-36.203	2370	167.682	2370	48.0929	2088.72	4.90494	2370	149.563
2371.5	194.753	1814.85	-43.9978	2371.5	199.031	1814.85	-40.2568	2371.5	171.5	2371.5	2.13454	2089.69	4.02321	2371.5	141.437
2373	226.637	1815.85	-61.7843	2373	184.655	1815.85	-40.9411	2373	81.1849	2373	0	2090.66	3.5964	2373	135.142
2374.5	147.298	1816.86	-50.3936	2374.5	224.013	1816.86	-37.4762	2374.5	95.911	2374.5	57.7688	2091.62	3.83183	2374.5	170.153
2376	0	1817.87	-20.3329	2376	280.032	1817.87	-31.0915	2376	126.22	2376	99.106	2092.59	4.74127	2376	60.9945
2377.5	0	1818.88	-20.1322	2377.5	187.205	1818.88	-24.4703	2377.5	0	2377.5	66.2366	2093.56	6.14673	2377.5	0
2379	89.9508	1819.89	-9.93147	2379	235.796	1819.89	-20.2858	2379	102.577	2379	11.9538	2094.52	7.73173	2379	63.7589
2380.5	208.251	1820.89	-18.928	2380.5	208.564	1820.89	-19.7571	2380.5	270.406	2380.5	25.1881	2095.49	9.12243	2380.5	129.299
2382	44.2872	1821.9	-7.6573	2382	0	1821.9	-22.1504	2382	146.975	2382	38.2407	2096.45	9.9762	2382	0
2383.5	0	1822.91	-46.3966	2383.5	222.147	1822.91	-25.4351	2383.5	118.842	2383.5	51.5905	2097.42	10.0513	2383.5	3.12964
2385	205.991	1823.92	-45.9359	2385	249.023	1823.92	-27.6368	2385	140.47	2385	102.825	2098.39	9.24365	2385	194.869
2386.5	329.111	1824.92	-6.79242	2386.5	128.4	1824.92	-27.8929	2386.5	158.587	2386.5	123	2099.35	7.58239	2386.5	305.721
2388	234.931	1825.93	-20.0617	2388	187.61	1825.93	-26.6281	2388	192.28	2388	82.6851	2100.32	5.1919	2388	222.365
2389.5	115.328	1826.93	-34.7883	2389.5	211.343	1826.93	-24.8462	2389.5	154.995	2389.5	31.5584	2101.28	2.23768	2389.5	137.936
2391	165.934	1827.94	-23.7875	2391	22.1587	1827.94	-23.281	2391	83.8644	2391	13.9782	2102.25	-1.12618	2391	137.709
2392.5	165.272	1828.95	-22.9268	2392.5	0	1828.95	-21.9457	2392.5	108.203	2392.5	28.7569	2103.21	-4.78691	2392.5	135.028
2394	0	1829.95	-15.9134	2394	162.118	1829.95	-20.3801	2394	187.438	2394	26.9933	2104.18	-8.67426	2394	94.4198
2395.5	112.502	1830.96	-21.9827	2395.5	75.302	1830.96	-18.2201	2395.5	207.865	2395.5	18.0468	2105.14	-12.7316	2395.5	165.911
2397	152.209	1831.97	-21.252	2397	12.6111	1831.97	-15.5284	2397	203.956	2397	43.756	2106.11	-16.8718	2397	195.719
2398.5	86.1317	1832.97	-9.3085	2398.5	58.6797	1832.97	-12.6984	2398.5	123.108	2398.5	66.008	2107.07	-20.9343	2398.5	0
2400	120.023	1833.98	5.8222	2400	152.031	1833.98	-10.0706	2400	26.8016	2400	52.7002	2108.04	-24.663	2400	0
2401.5	0	1834.98	-24.3743	2401.5	117.83	1834.98	-7.62593	2401.5	0	2401.5	0	2109	-27.717	2401.5	41.8781
2403	119.239	1835.99	-3.37363	2403	20.2266	1835.99	-5.11524	2403	89.1839	2403	0	2109.96	-29.7182	2403	11.9907
2404.5	367.507	1836.99	-2.63016	2404.5	0	1836.99	-2.39365	2404.5	211.755	2404.5	48.7458	2110.93	-30.3264	2404.5	56.6785
2406	216.466	1838	-6.56945	2406	0	1838	0.268385	2406	168.19	2406	52.584	2111.89	-29.3245	2406	45.3911
2407.5	37.6057	1839	23.774	2407.5	32.8267	1839	2.31123	2407.5	152.142	2407.5	69.9436	2112.86	-26.6938	2407.5	20.0248
2409	132.937	1840.01	-3.09528	2409	77.5352	1840.01	3.2783	2409	121.081	2409	125.596	2113.82	-22.6571	2409	34.7576
2410.5	238.447	1841.01	-5.95181	2410.5	33.1184	1841.01	3.2667	2410.5	121.477	2410.5	125.874	2114.78	-17.6791	2410.5	50.4629
2412	163.88	1842.01	11.0617	2412	0	1842.01	2.9487	2412	237.424	2412	43.3401	2115.75	-12.4164	2412	36.3582
2413.5	5.24292	1843.02	-4.34764	2413.5	36.0227	1843.02	3.17419	2413.5	163.649	2413.5	0	2116.71	-7.62594	2413.5	48.9584
2415	0	1844.02	9.46583	2415	20.1245	1844.02	4.37161	2415	58.2709	2415	29.0896	2117.67	-4.0474	2415	74.4733
2416.5	86.7769	1845.03	6.06653	2416.5	0	1845.03	6.1338	2416.5	15.082	2416.5	56.1887	2118.63	-2.27743	2416.5	32.057
2418	62.9363	1846.03	0	2418	32.8623	1846.03	7.38277	2418	0	2418	12.0467	2119.6	-2.6602	2418	0
2419.5	60.3242	1847.03	21.6879	2419.5	65.0083	1847.03	6.94663	2419.5	107.823	2419.5	68.933	2120.56	-5.21272	2419.5	17.629
2421	49.6462	1848.04	-4.67501	2421	71.2876	1848.04	4.29489	2421	104.337	2421	122.059	2121.52	-9.60117	2421	40.7672
2422.5	0	1849.04	11.6728	2422.5	150.042	1849.04	-0.0500924	2422.5	0	2422.5	99.4719	2122.48	-15.1742	2422.5	0
2424	20.0481	1850.04	-5.1793	2424	305.483	1850.04	-4.72043	2424	17.3639	2424	80.618	2123.45	-21.0531	2424	59.4205
2425.5	88.0144	1851.04	-10.9614	2425.5	139.22	1851.04	-8.17122	2425.5	60.2385	2425.5	46.1359	2124.41	-26.2683	2425.5	132.23
2427	20.8591	1852.05	-38.6643	2427	83.6443	1852.05	-9.49877	2427	128.897	2427	67.9688	2125.37	-29.9228	2427	103.381
2428.5	65.1682	1853.05	20.0836	2428.5	141.925	1853.05	-8.89469	2428.5	175.692	2428.5	117.102	2126.33	-31.3557	2428.5	77.5474
2430	259.227	1854.05	-20.2286	2430	0	1854.05	-7.5115	2430	102.754	2430	63.4091	2127.29	-30.2749	2430	244.019
2431.5	119.968	1855.05	3.84926	2431.5	20.2156	1855.05	-6.72277	2431.5	86.3766	2431.5	24.1751	2128.25	-26.831	2431.5	192.822
2433	0	1856.06	0.4264	2433	30.0105	1856.06	-7.25175	2433	74.84	2433	0	2129.21	-21.6102	2433	0
2434.5	168.348	1857.06	-38.8257	2434.5	106.865	1857.06	-8.6554	2434.5	100.547	2434.5	3.05579	2130.18	-15.5389	2434.5	206.483
2436	328.042	1858.06	19.1221	2436	217.758	1858.06	-9.57236	2436	81.7473	2436	29.3211	2131.14	-9.71124	2436	172.806
2437.5	346.416	1859.06	-16.53	2437.5	72.0456	1859.06	-8.56672	2437.5	0	2437.5	76.1721	2132.1	-5.17154	2437.5	67.4773
2439	172.562	1860.06	-18.9922	2439	0	1860.06	-5.12396	2439	0	2439	62.1805	2133.06	-2.69325	2439	141.471
2440.5	78.0803	1861.06	-0.774318	2440.5	97.2739	1861.06	-0.1411	2440.5	96.9226	2440.5	53.029	2134.02	-2.60772	2440.5	150.465
2442	192.276	1862.06	6.64354	2442	134.844	1862.06	4.43905	2442	134.918	2442	126.21	2134.98	-4.72539	2442	111.198
2443.5	180.544	1863.07	23.7507	2443.5	30.3887	1863.07	6.66458	2443.5	135.504	2443.5	49.7572	2135.94	-8.37522	2443.5	77.3675
2445	68.2695	1864.07	3.29853	2445	16.2356	1864.07	5.67656	2445	110.69	2445	12.138	2136.9	-12.5602	2445	56.8119
2446.5	0	1865.07	8.70639	2446.5	28.1724	1865.07	2.1366	2446.5	9.78442	2446.5	43.8963	2137.86	-16.1981	2446.5	34.3921
2448	172.028	1866.07	-4.81576	2448	46.5642	1866.07	-2.21511	2448	0	2448	43.335	2138.82	-18.391	2448	40.1046
2449.5	148.611	1867.07	-25.3979	2449.5	6.99854	1867.07	-5.61765	2449.5	45.8619	2449.5	61.5564	2139.78	-18.6591	2449.5	3.98364
2451	105.201	1868.07	-5.71004	2451	0	1868.07	-7.24791	2451	0	2451	19.0132	2140.74	-17.0758	2451	0
2452.5	146.886	1869.07	8.49781	2452.5	116.824	1869.07	-7.48936	2452.5	28.3489	2452.5	0	2141.7	-14.2674	2452.5	112.342
2454	0	1870.07	-9.42433	2454	148.879	1870.07	-7.40898	2454	81.0738	2454	55.0692	2142.66	-11.2711	2454	5.31775
2455.5	131.587	1871.07	-14.1365	2455.5	47.4294	1871.07	-7.87352	2455.5	25.4261	2455.5	93.2549	2143.62	-9.28295	2455.5	1.19324
2457	146.576	1872.07	-8.32862	2457	188.034	1872.07	-8.93928	2457	89.0996	2457	77.6438	2144.57	-9.35721	2457	159.606
2458.5	0	1873.07	-2.11076	2458.5	231.526	1873.07	-9.90149	2458.5	89.3639	2458.5	34.45	2145.53	-12.1305	2458.5	79.6616
2460	108.604	1874.06	-30.2522	2460	31.7429	1874.06	-9.89442	2460	0	2460	63.9796	2146.49	-17.6397	2460	0
2461.5	223.063	1875.06	10.3557	2461.5	100.966	1875.06	-8.59039	2461.5	124.189	2461.5	103.641	2147.45	-25.281	2461.5	155.463
2463	181.251	1876.06	-14.2265	2463	76.2485	1876.06	-6.45813	2463	224.452	2463	95.0265	2148.41	-33.9179	2463	325.988
2464.5	36.1274	1877.06	-9.07862	2464.5	0	1877.06	-4.50841	2464.5	146.531	2464.5	33.8013	2149.37	-42.1113	2464.5	141.986
2466	63.8247	1878.06	-1.27076	2466	136.772	1878.06	-3.69913	2466	95.7747	2466	1.08917	2150.32	-48.415	2466	98.1101
2467.5	141.394	1879.06	10.2771	2467.5	118.954	1879.06	-4.4287	2467.5	141.271	2467.5	0	2151.28	-51.6657	2467.5	154.721
2469	168.041	1880.06	-9.77505	2469	63.5532	1880.06	-6.39326	2469	114.904	2469	53.8521	2152.24	-51.1979	2469	189.443
2470.5	148.344	1881.06	-19.4272	2470.5	0	1881.06	-8.80961	2470.5	1.92151	2470.5	75.1395	2153.2	-46.9443	2470.5	204.03
2472	166.788	1882.05	-3.96861	2472	0	1882.05	-10.7947	2472	0	2472	19.5547	2154.15	-39.4013	2472	71.2539
2473.5	59.782	1883.05	-22.4208	2473.5	75.5432	1883.05	-11.708	2473.5	97.8024	2473.5	0	2155.11	-29.4837	2473.5	0
2475	0	1884.05	-1.2729	2475	31.5645	1884.05	-11.3016	2475	112.888	2475	29.4941	2156.07	-18.3058	2475	3.73877
2476.5	31.0449	1885.05	-12.125	2476.5	0	1885.05	-9.78427	2476.5	54.6361	2476.5	61.2885	2157.03	-6.94903	2476.5	0
2478	122.827	1886.04	-11.6065	2478	67.928	1886.04	-7.77085	2478	54.0048	2478	63.3191	2157.98	3.73698	2478	107.251
2479.5	137.464	1887.04	-9.52861	2479.5	0	1887.04	-6.14982	2479.5	92.0006	2479.5	42.283	2158.94	13.2578	2479.5	109.662
2481	224.164	1888.04	4.41925	2481	50.1602	1888.04	-5.77053	2481	57.0161	2481	24.7138	2159.9	21.5095	2481	38.8679
2482.5	233.173	1889.03	-2.52217	2482.5	102.627	1889.03	-7.07797	2482.5	89.05	2482.5	27.9347	2160.85	28.7266	2482.5	98.0625
2484	94.624	1890.03	-18.8443	2484	58.0085	1890.03	-9.83199	2484	144.387	2484	46.1903	2161.81	35.3657	2484	145.12
2485.5	37.6165	1891.03	-5.56646	2485.5	83.5627	1891.03	-13.0816	2485.5	4.60388	2485.5	69.4802	2162.76	41.9539	2485.5	63.3704
2487	48.3149	1892.02	-21.7079	2487	0	1892.02	-15.5447	2487	58.4301	2487	94.2806	2163.72	48.9342	2487	0
2488.5	164.917	1893.02	-13.09	2488.5	1.77734	1893.02	-16.2028	2488.5	100.485	2488.5	88.8303	2164.67	56.5382	2488.5	62.5242
2490	169.215	1894.02	-27.1422	2490	83.5915	1894.02	-14.7584	2490	0	2490	38.5184	2165.63	64.7061	2490	62.0967
2491.5	76.3435	1895.01	-8.22359	2491.5	83.0061	1895.01	-11.7495	2491.5	122.268	2491.5	62.6481	2166.59	73.0727	2491.5	57.804
2493	0	1896.01	-7.74574	2493	42.2744	1896.01	-8.23806	2493	109.842	2493	46.9179	2167.54	81.0219	2493	31.759
2494.5	42.3428	1897	-4.28716	2494.5	41.2175	1897	-5.2441	2494.5	32.3107	2494.5	0	2168.5	87.8051	2494.5	0
2496	149.728	1898	2.9907	2496	54.7148	1898	-3.34967	2496	21.8738	2496	5.61722	2169.45	92.7081	2496	74.8499
2497.5	69.1931	1898.99	9.37928	2497.5	0	1898.99	-2.55991	2497.5	16.2993	2497.5	76.4522	2170.41	95.2347	2497.5	23.2412
2499	134.166	1899.99	-22.4029	2499	51.8586	1899.99	-2.53352	2499	113.627	2499	109.206	2171.36	95.2681	2499	0
2500.5	126.726	1900.98	-8.15429	2500.5	120.301	1900.98	-2.85771	2500.5	180.611	2500.5	107.485	2172.32	93.1674	2500.5	75.8206
2502	0	1901.98	0.993566	2502	56.4216	1901.98	-3.29355	2502	57.5223	2502	66.1037	2173.27	89.765	2502	21.9553
2503.5	155.478	1902.97	14.9821	2503.5	84.1768	1902.97	-3.785	2503.5	0	2503.5	35.0626	2174.22	86.2469	2503.5	74.0879
2505	147.42	1903.97	0	2505	156.4	1903.97	-4.42324	2505	157.036	2505	33.4043	2175.18	83.9323	2505	99.2344
2506.5	20.9934	1904.96	-29.5285	2506.5	81.7022	1904.96	-5.33528	2506.5	227.375	2506.5	0	2176.13	83.9958	2506.5	8.32837
2508	21.8108	1905.96	-11.0613	2508	71.7705	1905.96	-6.66467	2508	197.076	2508	11.4784	2177.09	87.2013	2508	0
2509.5	34.7678	1906.95	1.82017	2509.5	150.163	1906.95	-8.48003	2509.5	146.833	2509.5	91.6585	2178.04	93.7282	2509.5	74.7546
2511	15.4097	1907.95	5.61741	2511	49.6797	1907.95	-10.7124	2511	96.6604	2511	88.6569	2178.99	103.148	2511	44.4922
2512.5	28.9661	1908.94	-15.5111	2512.5	71.0845	1908.94	-13.0354	2512.5	0	2512.5	54.5226	2179.95	114.577	2512.5	0
2514	156.656	1909.93	-35.5697	2514	140.078	1909.93	-14.9131	2514	29.6146	2514	66.0861	2180.9	126.982	2514	111.045
2515.5	69.9668	1910.93	-9.10242	2515.5	0	1910.93	-15.7685	2515.5	59.4489	2515.5	45.9233	2181.85	139.554	2515.5	44.6575
2517	0	1911.92	-16.091	2517	127.269	1911.92	-15.2424	2517	30.6815	2517	48.2912	2182.81	152.036	2517	65.2871
2518.5	133.294	1912.91	-14.2795	2518.5	195.625	1912.91	-13.4069	2518.5	95.991	2518.5	126.105	2183.76	164.905	2518.5	122.644
2520	126.29	1913.91	-12.2122	2520	166.435	1913.91	-10.7189	2520	78.4071	2520	104.963	2184.71	179.326	2520	0
2521.5	0	1914.9	0.92922	2521.5	148.604	1914.9	-7.76507	2521.5	0	2521.5	0	2185.67	196.867	2521.5	10.6023
2523	60.179	1915.89	-10.7293	2523	0	1915.89	-5.0085	2523	31.8301	2523	66.8449	2186.62	219.065	2523	102.315
2524.5	94.6672	1916.88	-6.24785	2524.5	59.4802	1916.88	-2.65937	2524.5	37.0791	2524.5	106.076	2187.57	246.984	2524.5	97.8254
2526	40.8953	1917.88	5.00939	2526	85.759	1917.88	-0.790744	2526	20.7421	2526	78.3849	2188.52	280.927	2526	0
2527.5	0	1918.87	-0.909142	2527.5	46.9775	1918.87	0.486685	2527.5	15.3463	2527.5	80.9191	2189.47	320.471	2527.5	0
2529	13.6504	1919.86	-3.22768	2529	181.191	1919.86	0.938582	2529	2.92017	2529	129.391	2190.43	364.874	2529	91.7324
2530.5	89.1343	1920.85	16.7138	2530.5	208.992	1920.85	0.384393	2530.5	75.3029	2530.5	193.755	2191.38	413.803	2530.5	116.374
2532	105.174	1921.85	-10.689	2532	88.9959	1921.85	-1.05302	2532	118.419	2532	187.344	2192.33	468.202	2532	39.4119
2533.5	36.8828	1922.84	-7.2775	2533.5	0	1922.84	-2.82835	2533.5	57.9992	2533.5	125.971	2193.28	531.022	2533.5	17.1462
2535	3.92285	1923.83	7.99396	2535	40.7395	1923.83	-4.20709	2535	0	2535	107.059	2194.23	607.52	2535	25.6916
2536.5	45.0815	1924.82	-18.8546	2536.5	112.803	1924.82	-4.66991	2536.5	53.5688	2536.5	102.953	2195.18	704.888	2536.5	21.9487
2538	0	1925.81	-8.2431	2538	108.029	1925.81	-4.24194	2538	99.4236	2538	97.9919	2196.13	831.139	2538	38.4512
2539.5	1.41333	1926.8	10.0984	2539.5	23.8721	1926.8	-3.4465	2539.5	76.7915	2539.5	67.0668	2197.08	993.365	2539.5	83.3086
2541	117.914	1927.79	-3.56017	2541	0	1927.79	-2.88282	2541	14.2922	2541	28.625	2198.04	1195.68	2541	6.66455
2542.5	113.038	1928.78	-7.87871	2542.5	204.321	1928.78	-2.73112	2542.5	0	2542.5	94.3113	2198.99	1437.29	2542.5	60.3611
2544	139.288	1929.78	-0.751466	2544	278.094	1929.78	-2.58295	2544	100.496	2544	116.155	2199.94	1711.26	2544	122.241
2545.5	7.22095	1930.77	0	2545.5	84.8071	1930.77	-1.74355	2545.5	83.5017	2545.5	50.95	2200.89	2004.24	2545.5	0
2547	0	1931.76	-14.1787	2547	0	1931.76	0.142518	2547	61.1886	2547	46.9258	2201.84	2297.53	2547	66.7698
2548.5	107.355	1932.75	10.5827	2548.5	18.385	1932.75	2.67848	2548.5	118.581	2548.5	55.8355	2202.79	2569.3	2548.5	158.59
2550	72.0908	1933.74	18.414	2550	24.4578	1933.74	4.81463	2550	198.626	2550	9.01224	2203.74	2797.62	2550	107.385
2551.5	13.3843	1934.73	-10.8246	2551.5	0.45947	1934.73	5.46345	2551.5	112.861	2551.5	0	2204.69	2963.84	2551.5	0
2553	47.1345	1935.72	18.5967	2553	0	1935.72	4.21844	2553	0	2553	43.5647	2205.64	3055.5	2553	0
2554.5	93.5327	1936.7	-2.88112	2554.5	29.8149	1936.7	1.67259	2554.5	66.1654	2554.5	40.0615	2206.59	3068.35	2554.5	109.117
2556	50.042	1937.69	-1.85977	2556	0	1937.69	-0.9227	2556	52.9399	2556	43.8331	2207.54	3006.9	2556	110.075
2557.5	0	1938.68	-2.96842	2557.5	46.127	1938.68	-2.38298	2557.5	79.569	2557.5	28.4624	2208.48	2883.54	2557.5	0
2559	11.116	1939.67	-5.53708	2559	83.6143	1939.67	-2.2706	2559	91.4814	2559	38.8146	2209.43	2716.3	2559	6.17041
2560.5	99.2192	1940.66	-3.44573	2560.5	26.5798	1940.66	-1.02873	2560.5	25.8779	2560.5	114.862	2210.38	2525.87	2560.5	13.8562
2562	125.502	1941.65	5.85562	2562	79.9853	1941.65	0.461385	2562	78.5159	2562	95.894	2211.33	2332.29	2562	2.45776
2563.5	0	1942.64	-11.783	2563.5	85.8513	1942.64	1.54907	2563.5	160.303	2563.5	25.4479	2212.28	2152.19	2563.5	35.2029
2565	0.13574	1943.63	22.7083	2565	68.7949	1943.63	2.2154	2565	98.5977	2565	0	2213.23	1996.84	2565	117.178
2566.5	159.942	1944.62	5.32966	2566.5	60.2918	1944.62	2.94001	2566.5	0	2566.5	48.3122	2214.18	1871.38	2566.5	145.003
2568	159.328	1945.6	-8.4182	2568	37.4207	1945.6	4.18406	2568	111.45	2568	124.616	2215.12	1775.24	2568	165.955
2569.5	157.195	1946.59	-7.78685	2569.5	147.477	1946.59	5.90027	2569.5	113.948	2569.5	70.8278	2216.07	1703.45	2569.5	158.583
2571	74.5005	1947.58	15.2345	2571	193.752	1947.58	7.51837	2571	80.5657	2571	24.7986	2217.02	1648.44	2571	106.433
2572.5	0	1948.57	20.6658	2572.5	148.789	1948.57	8.36516	2572.5	83.4967	2572.5	67.1052	2217.97	1601.92	2572.5	111.848
2574	138.082	1949.55	15.978	2574	214.872	1949.55	8.24477	2574	66.6148	2574	66.1847	2218.92	1556.42	2574	208.667
2575.5	289.373	1950.54	5.80934	2575.5	326.98	1950.54	7.66439	2575.5	78.5258	2575.5	48.2701	2219.86	1506.35	2575.5	154.293
2577	122.919	1951.53	-11.0293	2577	114.646	1951.53	7.53833	2577	27.1058	2577	67.4294	2220.81	1448.37	2577	0
2578.5	0	1952.52	-1.20797	2578.5	0	1952.52	8.48343	2578.5	0	2578.5	63.4721	2221.76	1381.29	2578.5	29.2703
2580	153.102	1953.5	29.3142	2580	234.852	1953.5	10.2707	2580	88.0498	2580	0	2222.7	1305.62	2580	123.643
2581.5	121.998	1954.49	16.0755	2581.5	294.89	1954.49	11.8276	2581.5	148.32	2581.5	23.4779	2223.65	1223	2581.5	141.341
2583	134.699	1955.48	10.6969	2583	227.136	1955.48	11.9042	2583	128.164	2583	65.6455	2224.6	1135.69	2583	122.457
2584.5	162.453	1956.46	14.019	2584.5	192.836	1956.46	9.9097	2584.5	90.5612	2584.5	57.269	2225.54	1046.17	2584.5	133.229
2586	100.731	1957.45	-3.35964	2586	163.779	1957.45	6.35995	2586	87.1492	2586	32.2999	2226.49	956.905	2586	95.1326
2587.5	75.7493	1958.44	7.00171	2587.5	83.7366	1958.44	2.6205	2587.5	126.497	2587.5	75.9854	2227.44	870.213	2587.5	23.5464
2589	21.2778	1959.42	-2.61615	2589	2.71704	1959.42	0.0400388	2589	69.2025	2589	58.6151	2228.38	788.176	2589	0
2590.5	50.1306	1960.41	1.7452	2590.5	3.73364	1960.41	-0.898057	2590.5	0	2590.5	27.3834	2229.33	712.51	2590.5	49.6809
2592	54.9438	1961.39	-4.54266	2592	8.2937	1961.39	-0.769096	2592	17.551	2592	24.9134	2230.27	644.419	2592	120.683
2593.5	0	1962.38	-3.91131	2593.5	0	1962.38	-0.684123	2593.5	106.598	2593.5	25.9795	2231.22	584.445	2593.5	138.76
2595	90.2263	1963.36	2.07083	2595	109.239	1963.36	-1.33073	2595	36.8285	2595	48.8519	2232.17	532.38	2595	34.6465
2596.5	62.3198	1964.35	3.76218	2596.5	175.799	1964.35	-2.40032	2596.5	61.8245	2596.5	82.1571	2233.11	487.293	2596.5	0
2598	0	1965.34	-1.87648	2598	200.484	1965.34	-2.74649	2598	96.0538	2598	62.0497	2234.06	447.693	2598	127.405
2599.5	121.205	1966.32	-6.02433	2599.5	229.486	1966.32	-1.26742	2599.5	85.3534	2599.5	13.4318	2235	411.824	2599.5	84.395
2601	278.365	1967.31	-20.463	2601	216.589	1967.31	2.15424	2601	165.592	2601	63.0263	2235.95	378.008	2601	135.054
2602.5	123.087	1968.29	17.1192	2602.5	313.437	1968.29	6.38711	2602.5	126.846	2602.5	129.967	2236.89	344.964	2602.5	189.434
2604	2.47461	1969.27	27.9013	2604	343.723	1969.27	9.6163	2604	85.5482	2604	152.286	2237.84	312.006	2604	107.507
2605.5	82.7905	1970.26	9.59265	2605.5	224.172	1970.26	10.457	2605.5	87.4045	2605.5	99.2982	2238.78	279.082	2605.5	107.62
2607	115.709	1971.24	5.04479	2607	98.2004	1971.24	8.83527	2607	45.691	2607	0	2239.73	246.647	2607	104.231
2608.5	46.0498	1972.23	3.53614	2608.5	143.72	1972.23	6.02028	2608.5	39.7835	2608.5	9.82822	2240.67	215.412	2608.5	58.4924
2610	39.2498	1973.21	9.37828	2610	193.078	1973.21	3.89211	2610	0	2610	24.6109	2241.61	186.077	2610	16.0566
2611.5	63.1973	1974.19	-8.49958	2611.5	96.1499	1974.19	3.84748	2611.5	43.3516	2611.5	42.3878	2242.56	159.105	2611.5	14.2043
2613	0	1975.18	4.92177	2613	0	1975.18	6.11651	2613	96.3965	2613	79.4169	2243.5	134.632	2613	23.3528
2614.5	95.6231	1976.16	7.84391	2614.5	219.628	1976.16	9.81087	2614.5	42.731	2614.5	77.8456	2244.44	112.509	2614.5	71.9356
2616	117.101	1977.15	25.5353	2616	192.369	1977.15	13.5199	2616	0	2616	59.6438	2245.39	92.4643	2616	56.9582
2617.5	0	1978.13	11.1174	2617.5	82.0264	1978.13	16.0866	2617.5	1.63184	2617.5	8.81464	2246.33	74.3127	2617.5	0
2619	73.4917	1979.11	27.3695	2619	166.14	1979.11	17.0119	2619	128.233	2619	23.0993	2247.28	58.1261	2619	84.6982
2620.5	147.248	1980.09	10.2817	2620.5	183.777	1980.09	16.4638	2620.5	124.004	2620.5	74.887	2248.22	44.3113	2620.5	164.219
2622	97.7769	1981.08	3.84303	2622	302.633	1981.08	14.9861	2622	31.1804	2622	49.2663	2249.16	33.5565	2622	184.022
2623.5	99.24	1982.06	23.6852	2623.5	157.916	1982.06	13.2004	2623.5	78.1527	2623.5	47.5654	2250.1	26.6668	2623.5	214.418
2625	70.2566	1983.04	23.4073	2625	0	1983.04	11.571	2625	89.8922	2625	34.1071	2251.05	24.3414	2625	241.789
2626.5	28.4712	1984.02	-5.41054	2626.5	123.904	1984.02	10.31	2626.5	12.9974	2626.5	7.20471	2251.99	26.9632	2626.5	106.565
2628	3.16626	1985.01	12.4108	2628	188.448	1985.01	9.32755	2628	0	2628	78.6321	2252.93	34.4671	2628	0.48877
2629.5	0	1985.99	5.46295	2629.5	35.8462	1985.99	8.30762	2629.5	10.3652	2629.5	90.393	2253.87	46.3222	2629.5	0
2631	71.0217	1986.97	7.17509	2631	31.2051	1986.97	6.89899	2631	61.915	2631	58.5413	2254.82	61.625	2631	79.2188
2632.5	141.799	1987.95	13.5572	2632.5	129.242	1987.95	5.0533	2632.5	88.5298	2632.5	30.0125	2255.76	79.2634	2632.5	243.247
2634	63.2444	1988.93	3.80937	2634	92.0044	1988.93	3.24591	2634	44.5399	2634	0	2256.7	98.0921	2634	191.987
2635.5	0	1989.91	-1.54848	2635.5	177.878	1989.91	2.37009	2635.5	78.6929	2635.5	21.5589	2257.64	117.062	2635.5	153.796
2637	48.3687	1990.9	-15.7171	2637	62.4136	1990.9	3.25329	2637	78.0602	2637	45.2008	2258.58	135.268	2637	221.789
2638.5	43.5906	1991.88	22.135	2638.5	0	1991.88	6.08198	2638.5	0	2638.5	61.4469	2259.53	151.918	2638.5	176.623
2640	0	1992.86	8.11715	2640	101.611	1992.86	10.1042	2640	0.39673	2640	78.5719	2260.47	166.251	2640	0
2641.5	32.6003	1993.84	11.9593	2641.5	64.4722	1993.84	13.9666	2641.5	98.1206	2641.5	21.0209	2261.41	177.462	2641.5	67.4477
2643	144.543	1994.82	12.7414	2643	116.614	1994.82	16.487	2643	40.8584	2643	44.0891	2262.35	184.688	2643	155.265
2644.5	59.5098	1995.8	27.1236	2644.5	59.3096	1995.8	17.381	2644.5	0	2644.5	29.9999	2263.29	187.08	2644.5	68.761
2646	38.5063	1996.78	24.9757	2646	85.3311	1996.78	17.4061	2646	52.0828	2646	13.5955	2264.23	183.959	2646	112.653
2647.5	59.615	1997.76	14.0179	2647.5	140.176	1997.76	17.7766	2647.5	12.5651	2647.5	46.9246	2265.17	175.023	2647.5	170.723
2649	8.52759	1998.74	0	2649	0	1998.74	19.228	2649	46.762	2649	37.4582	2266.11	160.524	2649	99.2393
2650.5	83.4524	1999.72	26.1037	2650.5	36.9448	1999.72	21.3885	2650.5	33.0198	2650.5	38.7148	2267.05	141.369	2650.5	77.2585
2652	92.8174	2000.7	28.6075	2652	93.2944	2000.7	22.9293	2652	39.051	2652	55.1985	2267.99	119.086	2652	148.418
2653.5	0	2001.68	28.9812	2653.5	36.1948	2001.68	22.4301	2653.5	91.5523	2653.5	46.6281	2268.93	95.6318	2653.5	0
2655	0	2002.66	31.745	2655	15.2983	2002.66	19.4023	2655	80.8765	2655	12.9693	2269.87	73.1047	2655	100.695
2656.5	24.9927	2003.64	11.0487	2656.5	0	2003.64	14.7984	2656.5	0	2656.5	0	2270.81	53.3901	2656.5	189.786
2658	68.2578	2004.62	-1.77756	2658	33.2588	2004.62	10.6709	2658	73.4399	2658	16.6055	2271.75	37.8483	2658	122.553
2659.5	65.1709	2005.6	1.52618	2659.5	69.6782	2005.6	9.17976	2659.5	97.9907	2659.5	23.8829	2272.69	27.1073	2659.5	133.639
2661	37.8135	2006.58	-0.370085	2661	62.563	2006.58	11.519	2661	0	2661	26.2139	2273.63	21.0123	2661	0
2662.5	8.12354	2007.55	36.4314	2662.5	0	2007.55	17.3348	2662.5	5.53076	2662.5	53.0782	2274.57	18.7375	2662.5	0
2664	122.823	2008.53	28.3951	2664	0.62402	2008.53	24.8575	2664	0.99316	2664	77.8982	2275.51	19.0268	2664	117.274
2665.5	98.0078	2009.51	23.5688	2665.5	0	2009.51	31.661	2665.5	93.5024	2665.5	45.1514	2276.45	20.4987	2665.5	181.019
2667	0	2010.49	28.2026	2667	0	2010.49	35.5842	2667	150.187	2667	0	2277.39	21.939	2667	179.189
2668.5	65.3921	2011.47	50.8363	2668.5	38.2168	2011.47	35.4871	2668.5	65.4297	2668.5	22.3083	2278.32	22.5157	2668.5	47.8701
2670	123.998	2012.45	42.2801	2670	0	2012.45	31.5811	2670	60.5671	2670	36.8364	2279.26	21.8747	2670	0.22119
2671.5	77.9409	2013.42	23.4715	2671.5	65.3394	2013.42	25.2826	2671.5	22.4209	2671.5	28.2494	2280.2	20.1126	2671.5	39.4587
2673	20.6768	2014.4	18.9153	2673	113.655	2014.4	18.6544	2673	58.3882	2673	68.9042	2281.14	17.6491	2673	35.1404
2674.5	77.9634	2015.38	-1.651	2674.5	154.591	2015.38	13.6842	2674.5	170.133	2674.5	127.99	2282.08	15.0485	2674.5	46.9605
2676	62.8984	2016.36	9.91274	2676	167.709	2016.36	11.5787	2676	89.7004	2676	42.1995	2283.01	12.8427	2676	46.251
2677.5	30.9243	2017.33	14.1842	2677.5	45.98	2017.33	12.4017	2677.5	0	2677.5	0	2283.95	11.3979	2677.5	95.553
2679	0	2018.31	10.0179	2679	0	2018.31	15.1672	2679	51.1843	2679	58.3401	2284.89	10.8527	2679	103.458
2680.5	86.3481	2019.29	18.6517	2680.5	86.3364	2019.29	18.3993	2680.5	86.0862	2680.5	88.6133	2285.83	11.1273	2680.5	0
2682	143.842	2020.26	50.6531	2682	108.894	2020.26	20.8166	2682	0	2682	22.0661	2286.77	11.9877	2682	36.2874
2683.5	107.854	2021.24	-6.97313	2683.5	9.34961	2021.24	21.8158	2683.5	66.6226	2683.5	41.9255	2287.7	13.1392	2683.5	26.1711
2685	87.8701	2022.22	21.1306	2685	0	2022.22	21.5473	2685	94.4602	2685	41.0142	2288.64	14.3176	2685	0.0293
2686.5	177.879	2023.19	30.5921	2686.5	104.072	2023.19	20.5277	2686.5	144.773	2686.5	20.8755	2289.58	15.3593	2686.5	105.622
2688	168	2024.17	20.1558	2688	136.339	2024.17	19.1014	2688	123.406	2688	34.7039	2290.51	16.2368	2688	203.713
2689.5	0	2025.14	19.6273	2689.5	1.07031	2025.14	17.1518	2689.5	0	2689.5	61.6702	2291.45	17.061	2689.5	0
2691	159.249	2026.12	9.861	2691	42.3897	2026.12	14.1771	2691	91.9883	2691	89.7976	2292.39	18.0566	2691	2.53809
2692.5	241.902	2027.1	9.69474	2692.5	86.0991	2027.1	9.78677	2692.5	82.0432	2692.5	86.3663	2293.32	19.5218	2692.5	100.882
2694	103.166	2028.07	17.2962	2694	44.6001	2028.07	4.20445	2694	51.9653	2694	18.2374	2294.26	21.7796	2694	3.87939
2695.5	52.731	2029.05	-14.4701	2695.5	15.1113	2029.05	-1.5516	2695.5	135.621	2695.5	0	2295.19	25.1291	2695.5	0
2697	70.2061	2030.02	-12.4686	2697	6.40625	2030.02	-5.96578	2697	146.199	2697	63.8904	2296.13	29.7971	2697	21.4666
2698.5	31.3789	2031	4.69513	2698.5	120.618	2031	-7.78426	2698.5	87.7432	2698.5	78.1039	2297.07	35.8937	2698.5	71.2246
2700	111.251	2031.97	-13.0334	2700	139.001	2031.97	-6.71863	2700	55.227	2700	0	2298	43.3743	2700	62.979
2701.5	114.73	2032.95	-18.5297	2701.5	67.5806	2032.95	-3.76903	2701.5	110.388	2701.5	14.1776	2298.94	52.0113	2701.5	0
2703	0	2033.92	-0.138214	2703	0	2033.92	-0.790872	2703	100.294	2703	89.3447	2299.87	61.3871	2703	52.1602
2704.5	17.1987	2034.9	17.3055	2704.5	0	2034.9	0.417271	2704.5	0	2704.5	17.9068	2300.81	70.9095	2704.5	61.6812
2706	134.215	2035.87	12.497	2706	52.3921	2035.87	-0.869405	2706	104.962	2706	37.3104	2301.74	79.86	2706	28.9368
2707.5	98.0215	2036.84	-15.7716	2707.5	131.619	2036.84	-3.89729	2707.5	182.828	2707.5	102.766	2302.68	87.4682	2707.5	31.9016
2709	22.1572	2037.82	-18.7378	2709	115.743	2037.82	-6.84962	2709	61.6499	2709	80.1835	2303.61	93.0103	2709	49.3518
2710.5	56.0806	2038.79	3.66363	2710.5	62.2114	2038.79	-7.91442	2710.5	0	2710.5	29.2494	2304.55	95.9122	2710.5	27.1706
2712	0	2039.77	-24.3626	2712	12.4185	2039.77	-6.40073	2712	125	2712	60.2018	2305.48	95.8447	2712	0
2713.5	8.08203	2040.74	3.22883	2713.5	0	2040.74	-3.10624	2713.5	147.838	2713.5	65.381	2306.42	92.7877	2713.5	30.8425
2715	0	2041.71	1.76029	2715	71.8945	2041.71	0.220269	2715	158.541	2715	22.5403	2307.35	87.0529	2715	73.5764
2716.5	26.8296	2042.69	13.064	2716.5	191.87	2042.69	2.06511	2716.5	133.73	2716.5	32.8083	2308.28	79.2545	2716.5	34.0378
2718	116.607	2043.66	5.19548	2718	177.357	2043.66	2.15548	2718	80.9858	2718	96.1354	2309.22	70.2302	2718	12.2798
2719.5	234.166	2044.63	-11.7431	2719.5	63.5996	2044.63	1.55822	2719.5	190.437	2719.5	97.4835	2310.15	60.9234	2719.5	4.60522
2721	167.741	2045.61	1.30068	2721	29.5049	2045.61	1.84373	2721	164.315	2721	56.4534	2311.09	52.2429	2721	0.2793
2722.5	27.7056	2046.58	3.69213	2722.5	102.244	2046.58	3.86204	2722.5	62.4558	2722.5	54.331	2312.02	44.9261	2722.5	50.7632
2724	81.5493	2047.55	11.5636	2724	108.558	2047.55	6.96914	2724	42.6616	2724	52.7202	2312.95	39.4274	2724	123.371
2725.5	153.431	2048.52	0.0950458	2725.5	0	2048.52	9.33205	2725.5	76.9688	2725.5	0	2313.89	35.8549	2725.5	0
2727	0	2049.5	21.1288	2727	9.11621	2049.5	9.07726	2727	97.6436	2727	20.7	2314.82	33.9691	2727	0
2728.5	72.0259	2050.47	13.2602	2728.5	0	2050.47	5.55284	2728.5	81.5261	2728.5	76.0225	2315.75	33.2457	2728.5	47.7983
2730	169.936	2051.44	6.4517	2730	67.4844	2051.44	-0.200676	2730	0	2730	47.1738	2316.68	32.9945	2730	30.3686
2731.5	198.329	2052.41	-14.2168	2731.5	99.2417	2052.41	-6.00862	2731.5	12.9348	2731.5	60.7794	2317.62	32.5124	2731.5	105.639
2733	157.724	2053.38	-28.8854	2733	3.25244	2053.38	-9.80703	2733	84.2944	2733	157.848	2318.55	31.2394	2733	92.2852
2734.5	48.4507	2054.35	-9.81393	2734.5	82.5884	2054.35	-10.7336	2734.5	0	2734.5	65.3398	2319.48	28.8849	2734.5	38.124
2736	42.7847	2055.33	-4.91019	2736	95.1157	2055.33	-9.41869	2736	16.4932	2736	69.1805	2320.41	25.494	2736	0
2737.5	42.3882	2056.3	2.95126	2737.5	0	2056.3	-7.37935	2737.5	94.8213	2737.5	49.0008	2321.35	21.4369	2737.5	0
2739	0	2057.27	-7.31728	2739	0	2057.27	-6.06564	2739	62.4053	2739	12.8592	2322.28	17.321	2739	73.5459
2740.5	22.0171	2058.24	-6.38583	2740.5	139.241	2058.24	-6.13249	2740.5	0	2740.5	98.7381	2323.21	13.8421	2740.5	98.5342
2742	0	2059.21	-15.7244	2742	46.6606	2059.21	-7.36406	2742	41.416	2742	46.3831	2324.14	11.6127	2742	0
2743.5	0	2060.18	-8.92291	2743.5	40.9145	2060.18	-9.11791	2743.5	115.538	2743.5	35.8551	2325.07	11.0078	2743.5	0
2745	71.1894	2061.15	-5.33146	2745	121.093	2061.15	-10.8768	2745	125.411	2745	70.3756	2326.01	12.0687	2745	138.002
2746.5	49.5176	2062.12	0	2746.5	66.8384	2062.12	-12.5262	2746.5	27.6877	2746.5	43.6776	2326.94	14.4935	2746.5	46.2647
2748	0	2063.09	-30.7101	2748	0	2063.09	-14.2524	2748	0	2748	0	2327.87	17.7155	2748	0
2749.5	48.6592	2064.06	-13.2902	2749.5	71.7231	2064.06	-16.2339	2749.5	105.587	2749.5	3.6958	2328.8	21.0526	2749.5	18.9087
2751	11.5664	2065.03	-19.7402	2751	39.376	2065.03	-18.3852	2751	120.115	2751	20.1524	2329.73	23.886	2751	46.8603
2752.5	97.9585	2066	-20.5903	2752.5	49.3545	2066	-20.3115	2752.5	49.5852	2752.5	52.933	2330.66	25.8181	2752.5	60.2227
2754	108.445	2066.97	-12.9004	2754	76.9224	2066.97	-21.4651	2754	0	2754	54.9493	2331.59	26.7646	2754	46.1431
2755.5	0	2067.94	-28.4105	2755.5	114.732	2067.94	-21.3902	2755.5	71.052	2755.5	30.3072	2332.52	26.9533	2755.5	49.6816
2757	0	2068.91	-24.9906	2757	149.654	2068.91	-19.9398	2757	111.257	2757	35.3403	2333.45	26.828	2757	113.808
2758.5	94.4512	2069.88	-21.0406	2758.5	45.7827	2069.88	-17.3863	2758.5	87.5044	2758.5	44.0191	2334.38	26.886	2758.5	150.253
2760	131.852	2070.85	-5.76072	2760	0	2070.85	-14.3822	2760	55.9915	2760	28.9681	2335.31	27.4964	2760	79.1562
2761.5	91.9219	2071.82	-20.6008	2761.5	18.1611	2071.82	-11.7653	2761.5	53.2932	2761.5	29.9145	2336.24	28.7561	2761.5	0
2763	21.9214	2072.79	3.74913	2763	0	2072.79	-10.2545	2763	36.9756	2763	54.9962	2337.17	30.4282	2763	53.709
2764.5	50.9907	2073.75	-12.0206	2764.5	75.397	2073.75	-10.1545	2764.5	46.9216	2764.5	53.9446	2338.1	31.985	2764.5	63.4087
2766	0	2074.72	-7.80072	2766	115.501	2074.72	-11.2486	2766	0	2766	0.19116	2339.03	32.7477	2766	0
2767.5	93.5386	2075.69	-24.3808	2767.5	52.5537	2075.69	-12.8998	2767.5	49.0566	2767.5	50.8645	2339.96	32.0829	2767.5	9.48926
2769	158.835	2076.66	-16.2909	2769	0	2076.66	-14.3838	2769	110.086	2769	108.261	2340.89	29.5999	2769	90.9189
2770.5	0	2077.63	-1.41096	2770.5	0.67383	2077.63	-15.2049	2770.5	83.6416	2770.5	8.80042	2341.82	25.2903	2770.5	40.0894
2772	23.6807	2078.59	-22.3807	2772	39.2422	2078.59	-15.2293	2772	144.369	2772	0	2342.75	19.5662	2772	98.5825
2773.5	39.2554	2079.56	-13.2308	2773.5	75.3813	2079.56	-14.6073	2773.5	51.5964	2773.5	89.9156	2343.68	13.1858	2773.5	97.8232
2775	6.96631	2080.53	-21.0109	2775	36.2563	2080.53	-13.538	2775	0	2775	64.6501	2344.6	7.08428	2775	0
2776.5	0	2081.5	-11.051	2776.5	0	2081.5	-12.1396	2776.5	33.7856	2776.5	0	2345.53	2.1575	2776.5	78.918
2778	73.0483	2082.46	-9.22074	2778	0	2082.46	-10.4536	2778	73.6711	2778	43.3399	2346.46	-0.93852	2778	140.246
2779.5	209.764	2083.43	3.25918	2779.5	25.6782	2083.43	-8.56973	2779.5	114.944	2779.5	53.3071	2347.39	-1.9203	2779.5	175.934
2781	51.1304	2084.4	-19.4509	2781	29.894	2084.4	-6.66834	2781	107.094	2781	35.3582	2348.32	-0.905478	2781	114.39
2782.5	4.53809	2085.36	-5.62067	2782.5	0	2085.36	-4.97443	2782.5	83.9851	2782.5	59.5098	2349.25	1.66389	2782.5	0
2784	20.8345	2086.33	-0.740747	2784	6.64307	2086.33	-3.64599	2784	67.8374	2784	60.8979	2350.17	5.17462	2784	7.81787
2785.5	0	2087.3	0.279173	2785.5	70.3809	2087.3	-2.6918	2785.5	51.1262	2785.5	15.9321	2351.1	9.021	2785.5	84.9131
2787	138.996	2088.26	-3.8906	2787	100.452	2088.26	-2.06065	2787	47.2087	2787	49.3215	2352.03	12.7545	2787	64.7534
2788.5	80.8682	2089.23	4.59932	2788.5	46.4902	2089.23	-1.78837	2788.5	25.9011	2788.5	11.4489	2352.96	16.1593	2788.5	28.6924
2790	0	2090.2	-5.45076	2790	15.5513	2090.2	-2.0068	2790	0	2790	18.0438	2353.88	19.2383	2790	65.6113
2791.5	66.3423	2091.16	-9.62052	2791.5	119.834	2091.16	-2.80443	2791.5	72.5112	2791.5	62.8176	2354.81	22.1214	2791.5	114.181
2793	32.833	2092.13	-3.9306	2793	107.479	2092.13	-3.99953	2793	88.2517	2793	22.0432	2355.74	24.9359	2793	106.518
2794.5	0	2093.09	5.89963	2794.5	0	2093.09	-5.00626	2794.5	16.4246	2794.5	0	2356.66	27.6877	2794.5	0
2796	68.418	2094.06	1.57955	2796	43.7666	2094.06	-5.05604	2796	13.4123	2796	0	2357.59	30.2004	2796	1.26318
2797.5	100.667	2095.02	-27.2502	2797.5	9.31104	2095.02	-3.58868	2797.5	11.4355	2797.5	73.9312	2358.52	32.136	2797.5	92.0161
2799	91.5244	2095.99	1.4997	2799	81.9067	2095.99	-0.677998	2799	24.9941	2799	113.836	2359.44	33.0939	2799	99.7246
2800.5	68.4189	2096.95	2.65993	2800.5	153.126	2096.95	2.92473	2800.5	40.148	2800.5	60.4529	2360.37	32.756	2800.5	168.47
2802	4.58398	2097.92	13.0098	2802	0	2097.92	6.08785	2802	0	2802	21.3086	2361.3	31.0311	2802	63.1728
2803.5	8.21045	2098.88	19.5101	2803.5	64.4512	2098.88	7.88475	2803.5	0	2803.5	15.4625	2362.22	28.1455	2803.5	20.5205
2805	45.7886	2099.85	0	2805	61.9668	2099.85	8.00792	2805	52.4228	2805	68.706	2363.15	24.6453	2805	45.4912
2806.5	12.6084	2100.81	9.68828	2806.5	0	2100.81	6.89173	2806.5	32.404	2806.5	64.0422	2364.07	21.303	2806.5	0
2808	0	2101.78	-4.39607	2808	17.4082	2101.78	5.3955	2808	15.7773	2808	0	2365	18.946	2808	20.3398
2809.5	41.7583	2102.74	8.76221	2809.5	40.0332	2102.74	4.37435	2809.5	83.2898	2809.5	0	2365.93	18.2546	2809.5	69.812
2811	43.9746	2103.71	6.81787	2811	0	2103.71	4.2682	2811	94.4397	2811	79.4211	2366.85	19.5841	2811	79.8325
2812.5	18.0142	2104.67	5.70615	2812.5	73.6699	2104.67	5.00527	2812.5	51.477	2812.5	111.623	2367.77	22.8585	2812.5	34.1548
2814	111.74	2105.63	-2.33557	2814	99.2481	2105.63	6.10314	2814	0.98584	2814	62.1937	2368.7	27.5685	2814	0
2815.5	117.829	2106.6	14.1101	2815.5	14.8145	2106.6	6.96277	2815.5	0	2815.5	0	2369.63	32.8709	2815.5	25.6001
2817	54.8511	2107.56	10.1984	2817	21.0855	2107.56	7.17335	2817	70.5403	2817	23.2283	2370.55	37.7638	2817	0
2818.5	0	2108.52	3.22664	2818.5	0	2108.52	6.67198	2818.5	0	2818.5	38.2964	2371.47	41.2916	2818.5	26.1484
2820	55.227	2109.49	1.1423	2820	0	2109.49	5.7624	2820	50.0823	2820	32.3704	2372.4	42.7283	2820	12.416
2821.5	141.309	2110.45	12.3006	2821.5	84.5972	2110.45	4.95599	2821.5	72.1003	2821.5	39.0087	2373.32	41.6997	2821.5	0
2823	164.646	2111.41	-0.681147	2823	83.6074	2111.41	4.68391	2823	45.6528	2823	39.7766	2374.25	38.2197	2823	71.8047
2824.5	145.649	2112.37	18.2071	2824.5	28.5425	2112.37	5.10712	2824.5	35.5759	2824.5	42.7582	2375.17	32.6474	2824.5	0
2826	60.4004	2113.34	-11.0672	2826	75.313	2113.34	6.09224	2826	0	2826	67.3873	2376.1	25.5847	2826	28.2017
2827.5	0	2114.3	0.0810669	2827.5	78.0254	2114.3	7.41544	2827.5	36.7009	2827.5	63.2047	2377.02	17.7524	2827.5	84.5225
2829	68.8999	2115.26	21.3693	2829	153.056	2115.26	8.98557	2829	128.391	2829	45.8196	2377.94	9.87369	2829	52.2651
2830.5	45.4341	2116.22	19.3276	2830.5	91.3091	2116.22	10.9569	2830.5	118.29	2830.5	56.0754	2378.87	2.59205	2830.5	31.0601
2832	0	2117.18	8.0859	2832	0	2117.18	13.561	2832	80.9597	2832	53.9227	2379.79	-3.57125	2832	87.4814
2833.5	30.4331	2118.15	12.5416	2833.5	35.7222	2118.15	16.7861	2833.5	68.2798	2833.5	0	2380.71	-8.22895	2833.5	0
2835	10.1328	2119.11	6.22984	2835	72.6489	2119.11	20.1899	2835	0	2835	47.1293	2381.64	-11.124	2835	0
2836.5	10.6255	2120.07	35.5181	2836.5	91.6548	2120.07	22.9976	2836.5	79.8098	2836.5	90.3841	2382.56	-12.1284	2836.5	64.6514
2838	0	2121.03	36.1364	2838	100.929	2121.03	24.5346	2838	146.411	2838	72.9884	2383.48	-11.2558	2838	81.9644
2839.5	44.6377	2121.99	13.2847	2839.5	49.3232	2121.99	24.6451	2839.5	114.1	2839.5	48.7598	2384.4	-8.68327	2839.5	105.43
2841	82.6069	2122.95	41.243	2841	0	2122.95	23.8	2841	35.4436	2841	45.5782	2385.33	-4.77118	2841	20.6372
2842.5	0	2123.91	15.2012	2842.5	88.6592	2123.91	22.7998	2842.5	0	2842.5	41.2837	2386.25	-0.0609513	2842.5	0
2844	17.8286	2124.88	4.45689	2844	105.706	2124.88	22.3052	2844	109.794	2844	60.4139	2387.17	4.76384	2844	27.5659
2845.5	56.584	2125.84	20.5452	2845.5	12.1836	2125.84	22.5934	2845.5	96.0818	2845.5	81.6836	2388.09	8.96068	2845.5	18.0649
2847	54.8159	2126.8	36.4934	2847	0	2126.8	23.6799	2847	20.1584	2847	88.3993	2389.02	11.8452	2847	9.52002
2848.5	69.1963	2127.76	46.9817	2848.5	70.9263	2127.76	25.7238	2848.5	73.8611	2848.5	96.3	2389.94	12.9198	2848.5	53.148
2850	37.8276	2128.72	0	2850	19.2759	2128.72	29.259	2850	119.965	2850	84.9374	2390.86	11.9809	2850	28.0571
2851.5	99.5571	2129.68	36.5805	2851.5	42.5107	2129.68	34.9842	2851.5	89.23	2851.5	78.7853	2391.78	9.17571	2851.5	79.5093
2853	51.377	2130.64	30.3609	2853	47.8623	2130.64	43.2029	2853	53.3992	2853	89.8276	2392.7	4.9868	2853	81.1148
2854.5	0	2131.6	52.1314	2854.5	0	2131.6	53.3585	2854.5	0	2854.5	74.5392	2393.62	0.142646	2854.5	0
2856	155.676	2132.56	87.2418	2856	50.1592	2132.56	64.1153	2856	72.8059	2856	121.424	2394.55	-4.52922	2856	93.0918
2857.5	135.373	2133.52	69.5523	2857.5	31.1567	2133.52	74.0536	2857.5	63.2793	2857.5	123.533	2395.47	-8.27265	2857.5	46.4712
2859	56.8071	2134.48	80.2627	2859	36.3765	2134.48	82.5628	2859	0	2859	0	2396.39	-10.5578	2859	0
2860.5	0	2135.43	88.8993	2860.5	0	2135.43	90.3065	2860.5	95.4077	2860.5	40.0699	2397.31	-11.1815	2860.5	26.2398
2862	23.4731	2136.39	90.6798	2862	30.5024	2136.39	98.8635	2862	137.112	2862	126.083	2398.23	-10.2908	2862	75.3364
2863.5	108.671	2137.35	112.99	2863.5	45.3643	2137.35	109.776	2863.5	76.2983	2863.5	111.243	2399.15	-8.32517	2863.5	63.1841
2865	68.3652	2138.31	119.431	2865	0	2138.31	123.551	2865	0	2865	55.5703	2400.07	-5.89456	2865	21.6763
2866.5	0	2139.27	140.411	2866.5	65.8545	2139.27	139.312	2866.5	0	2866.5	78.8921	2400.99	-3.62491	2866.5	13.8394
2868	72.7974	2140.23	152.852	2868	17.9082	2140.23	155.321	2868	36.2078	2868	92.3294	2401.91	-2.01103	2868	0
2869.5	128.778	2141.19	175.422	2869.5	74.4053	2141.19	170.027	2869.5	56.6946	2869.5	68.5533	2402.83	-1.31193	2869.5	13.1377
2871	111.78	2142.14	179.929	2871	117.362	2142.14	182.98	2871	78.1279	2871	34.347	2403.75	-1.51144	2871	68.8574
2872.5	1.9043	2143.1	214.239	2872.5	97.0474	2143.1	195.054	2872.5	77.3831	2872.5	4.36133	2404.67	-2.3491	2872.5	24.8525
2874	0	2144.06	185.48	2874	146.523	2144.06	207.912	2874	109.882	2874	32.0188	2405.59	-3.40834	2874	1.40332
2875.5	42.6294	2145.02	226.73	2875.5	95.0835	2145.02	223.036	2875.5	108.467	2875.5	83.1011	2406.51	-4.23542	2875.5	23.8252
2877	14.5625	2145.98	224.241	2877	7.53174	2145.98	240.951	2877	73.5447	2877	40.8959	2407.43	-4.45742	2877	11.3135
2878.5	43.5425	2146.93	269.807	2878.5	91.2065	2146.93	261.075	2878.5	78.0979	2878.5	30.836	2408.35	-3.87018	2878.5	35.4639
2880	39.9273	2147.89	298.648	2880	158.545	2147.89	282.164	2880	92.5715	2880	38.9233	2409.26	-2.47734	2880	142.737
2881.5	12.353	2148.85	284.558	2881.5	79.2134	2148.85	303.087	2881.5	71.1938	2881.5	64.8373	2410.18	-0.476146	2881.5	104.116
2883	34.0649	2149.8	327.725	2883	0	2149.8	323.334	2883	24.5066	2883	123.575	2411.1	1.80269	2883	0
2884.5	57.8535	2150.76	349.905	2884.5	52.1855	2150.76	343.024	2884.5	35.844	2884.5	52.2651	2412.02	3.98033	2884.5	24.6099
2886	53.9419	2151.72	353.546	2886	27.5391	2151.72	362.516	2886	31.2766	2886	69.924	2412.94	5.71864	2886	45.0747
2887.5	0	2152.67	386.982	2887.5	10.1313	2152.67	381.926	2887.5	5.03223	2887.5	54.4511	2413.86	6.79106	2887.5	49.1045
2889	56.0586	2153.63	397.293	2889	18.7573	2153.63	400.973	2889	56.7839	2889	55.5897	2414.78	7.12116	2889	159.523
2890.5	118.074	2154.59	437.603	2890.5	0	2154.59	419.295	2890.5	90.4185	2890.5	111.457	2415.69	6.78427	2890.5	0
2892	68.9683	2155.54	409.04	2892	43.2085	2155.54	436.878	2892	43.6262	2892	41.8815	2416.61	5.97613	2892	24.5327
2893.5	0	2156.5	469.35	2893.5	0	2156.5	454.212	2893.5	4.85986	2893.5	0	2417.53	4.96116	2893.5	0.36475
2895	107.446	2157.45	478.387	2895	22.8481	2157.45	471.963	2895	1.823	2895	7.21265	2418.45	4.01275	2895	0
2896.5	184.394	2158.41	480.567	2896.5	78.0229	2158.41	490.283	2896.5	27.3096	2896.5	24.7012	2419.36	3.36101	2896.5	128.681
2898	33.0425	2159.37	512.478	2898	11.209	2159.37	508.404	2898	0	2898	0	2420.28	3.15637	2898	0
2899.5	40.1953	2160.32	515.644	2899.5	0	2160.32	524.879	2899.5	1.89551	2899.5	1.00848	2421.2	3.4555	2899.5	29.4302
2901	92.5571	2161.28	543.955	2901	0	2161.28	538.462	2901	8.62646	2901	20.975	2422.12	4.22659	2901	96.4927
2902.5	12.6011	2162.23	569.921	2902.5	52.4136	2162.23	549.08	2902.5	29.2261	2902.5	19.3161	2423.03	5.37063	2902.5	38.7837
2904	0	2163.19	572.102	2904	53.1138	2163.19	558.068	2904	12.8298	2904	15.2898	2423.95	6.75027	2904	0
2905.5	111.444	2164.14	524.068	2905.5	41.207	2164.14	567.497	2905.5	31.3567	2905.5	23.4348	2424.87	8.22006	2905.5	60.8447
2907	62.0986	2165.09	595.505	2907	0	2165.09	578.917	2907	1.5708	2907	7.28979	2425.78	9.6498	2907	41.3809
2908.5	3.58105	2166.05	571.145	2908.5	0	2166.05	592.482	2908.5	0	2908.5	6.7135	2426.7	10.9378	2908.5	0
2910	102.377	2167	624.452	2910	6.8252	2167	607.094	2910	55.1934	2910	15.6489	2427.61	12.0139	2910	20.2798
2911.5	8.36865	2167.96	633.692	2911.5	97.4268	2167.96	621.415	2911.5	35.8257	2911.5	47.3643	2428.53	12.8304	2911.5	18.6621
2913	0	2168.91	633.129	2913	129.485	2168.91	635.035	2913	25.2502	2913	0	2429.45	13.3485	2913	0
2914.5	106.927	2169.87	639.969	2914.5	186.095	2169.87	648.782	2914.5	88.9231	2914.5	10.0364	2430.36	13.5213	2914.5	78.8677
2916	148.873	2170.82	653.406	2916	340.017	2170.82	664.039	2916	183.244	2916	106.824	2431.28	13.2814	2916	165.834
2917.5	88.3603	2171.77	681.643	2917.5	506.047	2171.77	681.486	2917.5	281.6	2917.5	88.6239	2432.19	12.5367	2917.5	140.335
2919	200.451	2172.73	697.823	2919	708.127	2172.73	700.361	2919	444.233	2919	127.181	2433.11	11.1782	2919	130.235
2920.5	284.682	2173.68	736.59	2920.5	999.318	2173.68	718.777	2920.5	638.356	2920.5	145.434	2434.02	9.10011	2920.5	224.958
2922	367.862	2174.63	733.096	2922	1469.92	2174.63	734.867	2922	899.55	2922	256.366	2434.94	6.22909	2922	373.124
2923.5	549.941	2175.59	751.407	2923.5	2000.68	2175.59	747.979	2923.5	1231.78	2923.5	396.328	2435.85	2.55877	2923.5	552.622
2925	807.755	2176.54	751.373	2925	2308.21	2176.54	759.137	2925	1432.83	2925	436.961	2436.77	-1.82129	2925	845.097
2926.5	1156.02	2177.49	776.54	2926.5	2420.55	2177.49	770.527	2926.5	1478.96	2926.5	508.184	2437.68	-6.70783	2926.5	1124.13
2928	1245.14	2178.44	778.117	2928	2438.87	2178.44	784.538	2928	1493.79	2928	516.985	2438.6	-11.7881	2928	1299.8
2929.5	1240.53	2179.4	795.087	2929.5	2375.67	2179.4	802.916	2929.5	1377.51	2929.5	474.49	2439.51	-16.6667	2929.5	1481.6
2931	1402.43	2180.35	812.794	2931	2044.59	2180.35	826.44	2931	1205.55	2931	470.666	2440.43	-20.9174	2931	1657.42
2932.5	1403.55	2181.3	861.16	2932.5	1630.79	2181.3	855.029	2932.5	977.299	2932.5	393.285	2441.34	-24.1489	2932.5	1664.36
2934	1269.79	2182.25	891.397	2934	1293.07	2182.25	888.137	2934	758.858	2934	265.24	2442.26	-26.0774	2934	1644.7
2935.5	1290.62	2183.21	918.507	2935.5	858.508	2183.21	925.289	2935.5	571.519	2935.5	274.021	2443.17	-26.5865	2935.5	1469.1
2937	1375.67	2184.16	948.344	2937	711.412	2184.16	966.717	2937	420.314	2937	231.047	2444.08	-25.7646	2937	1132.99
2938.5	1580.62	2185.11	1012.31	2938.5	462.381	2185.11	1013.85	2938.5	275.98	2938.5	188.26	2445	-23.9057	2938.5	813.529
2940	1693.91	2186.06	1072.82	2940	366.773	2186.06	1069.37	2940	186.787	2940	136.774	2445.91	-21.4722	2940	611.278
2941.5	1614.08	2187.01	1122.38	2941.5	317.378	2187.01	1136.49	2941.5	180.606	2941.5	71.6967	2446.82	-19.0236	2941.5	435.077
2943	1405.92	2187.96	1187.96	2943	119.066	2187.96	1217.89	2943	172.701	2943	35.6001	2447.74	-17.1226	2943	234.99
2944.5	1048.54	2188.91	1296.59	2944.5	0	2188.91	1314.99	2944.5	66.0144	2944.5	3.63391	2448.65	-16.2362	2944.5	120.934
2946	750.998	2189.86	1420.02	2946	69.4326	2189.86	1428.56	2946	73.2751	2946	34.4433	2449.56	-16.6518	2946	109.456
2947.5	417.35	2190.82	1553.27	2947.5	16.0137	2190.82	1560.45	2947.5	0	2947.5	47.1453	2450.48	-18.4234	2947.5	132.992
2949	264.762	2191.77	1682.17	2949	0	2191.77	1715.48	2949	0	2949	50.8257	2451.39	-21.3588	2949	132.363
2950.5	122.243	2192.72	1867.75	2950.5	22.7734	2192.72	1902.1	2950.5	21.4595	2950.5	31.3025	2452.3	-25.0494	2950.5	107.185
2952	0	2193.67	2088.11	2952	23.0957	2193.67	2131.66	2952	16.727	2952	11.0125	2453.21	-28.9364	2952	86.8735
2953.5	38.917	2194.62	2339.28	2953.5	0	2194.62	2417.39	2953.5	28.1755	2953.5	44.6561	2454.13	-32.3987	2953.5	0
2955	7.83252	2195.57	2700.72	2955	17.6318	2195.57	2774.79	2955	0	2955	30.5117	2455.04	-34.8462	2955	46.7202
2956.5	71.605	2196.52	3119.48	2956.5	13.7832	2196.52	3223.58	2956.5	22.7615	2956.5	22.3295	2455.95	-35.8033	2956.5	97.6689
2958	0	2197.47	3676.79	2958	0	2197.47	3788.3	2958	29.5718	2958	0	2456.86	-34.9689	2958	18.3682
2959.5	0	2198.42	4319.97	2959.5	22.6074	2198.42	4493.34	2959.5	24.8906	2959.5	21.673	2457.77	-32.2469	2959.5	111.69
2961	105.447	2199.37	5204.18	2961	24.9258	2199.37	5349.92	2961	0.92065	2961	59.8715	2458.69	-27.7477	2961	82.5327
2962.5	93.5019	2200.32	6205	2962.5	29.3496	2200.32	6338.13	2962.5	0	2962.5	12.7289	2459.6	-21.7661	2962.5	20.043
2964	15.1685	2201.26	7356.44	2964	0	2201.26	7392.93	2964	36.3738	2964	0	2460.51	-14.7426	2964	0
2965.5	0	2202.21	8532.66	2965.5	67.04	2202.21	8404.67	2965.5	28.3267	2965.5	2.80048	2461.42	-7.21497	2965.5	54.519
2967	30.2534	2203.16	9583.88	2967	73.71	2203.16	9240.03	2967	45.2788	2967	12.5299	2462.33	0.231728	2967	117.132
2968.5	50.1187	2204.11	10254.6	2968.5	33.124	2204.11	9778.52	2968.5	57.2432	2968.5	27.5048	2463.24	7.01635	2968.5	58.3838
2970	0	2205.06	10408.1	2970	0	2205.06	9950.85	2970	0	2970	9.21295	2463.4	12.618	2970	0
2971.5	59.771	2206.01	10101.2	2971.5	12.6182	2206.01	9761.82	2971.5	0	2971.5	2.7287	2464.32	16.5931	2971.5	96.7398
2973	130.463	2206.96	9387.24	2973	48.4414	2206.96	9287.2	2973	7.23975	2973	70.12	2465.23	18.6619	2973	89.2153
2974.5	167.909	2207.9	8582.58	2974.5	65.207	2207.9	8645.94	2974.5	161.41	2974.5	72.5645	2466.15	18.7109	2974.5	47.3403
2976	45.0723	2208.85	7848.7	2976	79.7656	2208.85	7960.96	2976	67.6836	2976	59.4444	2467.06	16.8183	2976	90.2358
2977.5	0	2209.8	7220.02	2977.5	75.0625	2209.8	7325.67	2977.5	0	2977.5	81.6058	2467.98	13.2485	2977.5	55.665
2979	74.7588	2210.75	6700.53	2979	37.6758	2210.75	6788.42	2979	67.2795	2979	88.499	2468.9	8.42152	2979	45.9844
2980.5	26.3315	2211.7	6263.65	2980.5	0	2211.7	6356.71	2980.5	29.7642	2980.5	37.406	2469.81	2.85618	2980.5	30.1025
2982	42.4624	2212.64	5982.59	2982	42.7109	2212.64	6013.42	2982	140.385	2982	17.83	2470.72	-2.90593	2982	15.187
2983.5	24.6572	2213.59	5664.91	2983.5	18.2373	2213.59	5734.12	2983.5	46.2778	2983.5	48.4721	2471.64	-8.38277	2983.5	0
2985	0	2214.54	5484.43	2985	52.5869	2214.54	5497.67	2985	0	2985	48.7677	2472.55	-13.2245	2985	16.5239
2986.5	21.7534	2215.48	5290.77	2986.5	76.4502	2215.48	5288.9	2986.5	68.1914	2986.5	37.3198	2473.47	-17.2619	2986.5	60.6426
2988	0	2216.43	5071.19	2988	0	2216.43	5096.8	2988	93.4771	2988	62.1808	2474.38	-20.5164	2988	0
2989.5	33.0269	2217.38	4937.4	2989.5	24.6846	2217.38	4912.72	2989.5	136.91	2989.5	107.541	2475.3	-23.1718	2989.5	47.8296
2991	39.0855	2218.32	4726.05	2991	57.8701	2218.32	4730.24	2991	103.89	2991	60.1549	2476.21	-25.511	2991	13.8286
2992.5	69.085	2219.27	4548.16	2992.5	39.7871	2219.27	4545.87	2992.5	25.0391	2992.5	96.3256	2477.12	-27.8348	2992.5	28.8281
2994	82.6992	2220.22	4354.68	2994	22.0449	2220.22	4358.63	2994	45.8086	2994	74.0554	2478.04	-30.3815	2994	52.0391
2995.5	29.6133	2221.16	4175.42	2995.5	0	2221.16	4167.89	2995.5	27.6753	2995.5	32.2552	2478.95	-33.2671	2995.5	0
2997	34.0576	2222.11	3974.36	2997	63.249	2222.11	3971.06	2997	0	2997	41.7908	2479.86	-36.4619	2997	75.4321
2998.5	28.291	2223.05	3775.28	2998.5	82.1231	2223.05	3763.13	2998.5	25.1235	2998.5	36.2938	2480.78	-39.8058	2998.5	22.5059
3000	0	2224	3570.61	3000	0	2224	3539	3000	73.4429	3000	61.8714	2481.69	-43.0584	3000	9.76563
3001.5	6.54102	2224.95	3320.7	3001.5	39.6074	2224.95	3297.17	3001.5	38.3652	3001.5	73.8053	2482.6	-45.9681	3001.5	49.5029
3003	71.4111	2225.89	3057.23	3003	41.4775	2225.89	3042.53	3003	83.8306	3003	105.429	2483.52	-48.3397	3003	86.8301
3004.5	36.9121	2226.84	2766.09	3004.5	24.8223	2226.84	2786.07	3004.5	41.8335	3004.5	33.6645	2484.43	-50.0815	3004.5	69.5361
3006	0	2227.78	2499.26	3006	8.08887	2227.78	2541.51	3006	0	3006	0	2485.34	-51.221	3006	0
3007.5	17.1396	2228.73	2295.91	3007.5	0	2228.73	2320.47	3007.5	34.0815	3007.5	67.1083	2486.25	-51.8843	3007.5	25.3227
3009	2.94629	2229.67	2085.69	3009	18.4551	2229.67	2128.74	3009	53.5801	3009	50.4531	2487.17	-52.2486	3009	48.5796
3010.5	59.7764	2230.62	1954.74	3010.5	40.0293	2230.62	1965.12	3010.5	86.5708	3010.5	82.6705	2488.08	-52.4826	3010.5	42.6431
3012	65.9814	2231.56	1807.78	3012	0	2231.56	1822.92	3012	95.0352	3012	88.5817	2488.99	-52.695	3012	0
3013.5	15.0957	2232.51	1701.67	3013.5	18.5088	2232.51	1693.14	3013.5	82.2344	3013.5	59.3387	2489.9	-52.9058	3013.5	27.1611
3015	40.418	2233.45	1565.87	3015	42.0801	2233.45	1567.5	3015	68.4639	3015	24.7231	2490.81	-53.0486	3015	101.779
3016.5	0	2234.39	1445.62	3016.5	0	2234.39	1440.49	3016.5	0	3016.5	0	2491.72	-53.0041	3016.5	0
3018	0	2235.34	1316.55	3018	37.2685	2235.34	1309.93	3018	0	3018	28.686	2492.64	-52.6514	3018	48.3218
3019.5	16.4629	2236.28	1179.91	3019.5	19.6768	2236.28	1176.45	3019.5	29.7124	3019.5	26.095	2493.55	-51.9211	3019.5	85.7266
3021	0	2237.23	1034.32	3021	16.7197	2237.23	1042.56	3021	16.1733	3021	58.954	2494.46	-50.8331	3021	0
3022.5	37.4609	2238.17	911.186	3022.5	0	2238.17	911.67	3022.5	0	3022.5	52.4307	2495.37	-49.5055	3022.5	0
3024	107.269	2239.11	773.049	3024	65.4775	2239.11	787.402	3024	85.8794	3024	3.62793	2496.28	-48.1308	3024	117.13
3025.5	81.8945	2240.06	656.375	3025.5	98.96	2240.06	673.118	3025.5	106.83	3025.5	20.8559	2497.19	-46.9257	3025.5	100.249
3027	0	2241	566.328	3027	8.72461	2241	571.635	3027	0	3027	63.1145	2498.1	-46.0688	3027	0
3028.5	12.8721	2241.94	474.801	3028.5	0	2241.94	484.946	3028.5	0	3028.5	16.2915	2499.01	-45.6452	3028.5	67.3501
3030	2.35938	2242.89	386.287	3030	17.8906	2242.89	414.075	3030	53.2983	3030	12.0436	2499.92	-45.6137	3030	45.4878
3031.5	59.002	2243.83	336.052	3031.5	6.55273	2243.83	359.068	3031.5	22.7539	3031.5	16.8335	2500.83	-45.809	3031.5	69.439
3033	67.8281	2244.77	326.624	3033	0	2244.77	319.114	3033	30.1001	3033	34.3832	2501.74	-45.9785	3033	95.9849
3034.5	0	2245.71	277.437	3034.5	9.62305	2245.71	292.833	3034.5	15.7979	3034.5	25.9237	2502.65	-45.8455	3034.5	0
3036	57.581	2246.65	267.07	3036	9.5127	2246.65	278.523	3036	4.96875	3036	14.5602	2503.56	-45.1833	3036	85.7837
3037.5	146.449	2247.6	259.383	3037.5	13.7012	2247.6	274.355	3037.5	28.8955	3037.5	20.442	2504.47	-43.8797	3037.5	82.2725
3039	4.43359	2248.54	280.795	3039	44.7344	2248.54	278.569	3039	25.1704	3039	0	2505.38	-41.9761	3039	16.6773
3040.5	18.9199	2249.48	287.128	3040.5	0	2249.48	289.715	3040.5	80.3823	3040.5	22.8899	2506.29	-39.6698	3040.5	46.0464
3042	86.6338	2250.42	293.621	3042	34.7666	2250.42	307.005	3042	46.6621	3042	38.207	2507.2	-37.2786	3042	71.2612
3043.5	0	2251.36	331.553	3043.5	24.375	2251.36	330.513	3043.5	0	3043.5	0.73047	2508.11	-35.1759	3043.5	47.7466
3045	76.8887	2252.31	352.157	3045	27.4473	2252.31	360.95	3045	34.939	3045	15.2231	2509.02	-33.7111	3045	67.0073
3046.5	110.695	2253.25	390.619	3046.5	0	2253.25	398.924	3046.5	24.2451	3046.5	47.2296	2509.93	-33.1339	3046.5	28.2832
3048	83.7588	2254.19	439.592	3048	69.3203	2254.19	443.97	3048	74.9302	3048	74.9403	2510.84	-33.5393	3048	21.9355
[truncated: 1,895 more rows]
