# Supplementary material for: Non–linear bonding trends in maleonitrile-1,2–dithiolate complexes of the transuranium actinides (An3+ = Np3+ – Cf3+ excl. Bk3+)
Source: Research Square preprint supplement (doi:10.21203/rs.3.rs-6100125/v1), 2025-03-05
Supplement: Supplementary file 13 [file uv-vis-spectra.xlsx]

## Sheet: Solid State UV-Vis-NIR
cm^-1	La	cm^-1	Ce	cm^-1	Pr	cm^-1	Nd	cm^-1	Sm	cm^-1	Eu	cm^-1	Gd	cm^-1	Dy	cm^-1	Np	cm^-1	Pu	cm^-1	Am	cm^-1	Cm	cm^-1	Cf
31222.7	-0.01219	31222.7	0.22623	31222.7	0.0148555	31222.7	0.2362	31222.7	-0.0355744	31222.7	-0.00106	31222.7	0.00618753	31222.7	0.2617	31222.7	0.920548	31222.7	0.5824	31222.7	0.3227	31222.7	0.189286	31222.7	0.20503
31145.9	0.02342	31145.9	0.32613	31145.9	0.0247447	31145.9	0.2917	31145.9	-0.0402001	31145.9	0.05679	31145.9	-0.018499	31145.9	0.294356	31145.9	0.92126	31145.9	0.5899	31145.9	0.2987	31145.9	0.231869	31145.9	0.13374
31069.4	-0.27207	31069.4	0.31363	31069.4	0.170734	31069.4	0.2617	31069.4	-0.0996317	31069.4	0.21253	31069.4	-0.174291	31069.4	0.266194	31069.4	0.922689	31069.4	0.4533	31069.4	0.4014	31069.4	0.324151	31069.4	-0.00596
30993.3	0.03023	30993.3	0.35793	30993.3	0.121423	30993.3	0.3001	30993.3	0.0387311	30993.3	0.000757271	30993.3	0.0306116	30993.3	0.31263	30993.3	0.924817	30993.3	0.5827	30993.3	0.3067	30993.3	0.148033	30993.3	0.14574
30917.6	0.01123	30917.6	0.39613	30917.6	0.0612123	30917.6	0.3341	30917.6	0.00148815	30917.6	0.06678	30917.6	0.0726088	30917.6	0.342572	30917.6	0.927627	30917.6	0.6238	30917.6	0.304	30917.6	0.141915	30917.6	0.18193
30842.3	0.07262	30842.3	0.34583	30842.3	0.135601	30842.3	0.2764	30842.3	0.0532396	30842.3	-0.00151	30842.3	0.0781006	30842.3	0.269827	30842.3	0.931106	30842.3	0.5716	30842.3	0.3136	30842.3	0.175198	30842.3	0.19473
30767.3	6.01002e-06	30767.3	0.37233	30767.3	0.119291	30767.3	0.3239	30767.3	0.0556854	30767.3	0.021	30767.3	0.0436872	30767.3	0.411816	30767.3	0.935242	30767.3	0.699	30767.3	0.3472	30767.3	0.29818	30767.3	0.16343
30692.7	0.05209	30692.7	0.35093	30692.7	0.10768	30692.7	0.3417	30692.7	0.00832568	30692.7	0.1051	30692.7	0.0738684	30692.7	0.298465	30692.7	0.940028	30692.7	0.5616	30692.7	0.3689	30692.7	0.194462	30692.7	0.20943
30618.5	0.01667	30618.5	0.42463	30618.5	0.124069	30618.5	0.3362	30618.5	0.0553604	30618.5	0.07219	30618.5	0.0529445	30618.5	0.327106	30618.5	0.945457	30618.5	0.6781	30618.5	0.4243	30618.5	0.275544	30618.5	0.18542
30544.6	0.03634	30544.6	0.42904	30544.6	0.126758	30544.6	0.43	30544.6	0.0171897	30544.6	0.02287	30544.6	0.233715	30544.6	0.307751	30544.6	0.951533	30544.6	0.5487	30544.6	0.3937	30544.6	0.380627	30544.6	0.20892
30471.1	0.04301	30471.1	0.39354	30471.1	0.179047	30471.1	0.3159	30471.1	0.0622136	30471.1	0.13294	30471.1	0.052481	30471.1	0.336383	30471.1	0.958262	30471.1	0.625	30471.1	0.3938	30471.1	0.245809	30471.1	0.12661
30397.9	0.11617	30397.9	0.39134	30397.9	0.183537	30397.9	0.3559	30397.9	0.052232	30397.9	0.0836	30397.9	0.124442	30397.9	0.360255	30397.9	0.965664	30397.9	0.6868	30397.9	0.4614	30397.9	0.345691	30397.9	0.1945
30325.1	0.09913	30325.1	0.34444	30325.1	0.133326	30325.1	0.3916	30325.1	0.0903451	30325.1	0.15846	30325.1	0.135497	30325.1	0.39281	30325.1	0.973768	30325.1	0.6972	30325.1	0.4069	30325.1	0.261873	30325.1	0.24139
30252.6	0.10888	30252.6	0.49684	30252.6	0.190415	30252.6	0.4265	30252.6	0.113253	30252.6	0.09221	30252.6	0.147648	30252.6	0.426727	30252.6	0.982622	30252.6	0.706	30252.6	0.4469	30252.6	0.304856	30252.6	0.24238
30180.5	0.12873	30180.5	0.45224	30180.5	0.193304	30180.5	0.3783	30180.5	0.108155	30180.5	0.17885	30180.5	0.235693	30180.5	0.437856	30180.5	0.992258	30180.5	0.6783	30180.5	0.3915	30180.5	0.329738	30180.5	0.23917
30108.7	0.15098	30108.7	0.49004	30108.7	0.205793	30108.7	0.4063	30108.7	0.170353	30108.7	0.21478	30108.7	0.184833	30108.7	0.465976	30108.7	1.00239	30108.7	0.675	30108.7	0.4929	30108.7	0.33232	30108.7	0.27896
30038.1	0.16401	30038.1	0.52294	30038.1	0.231162	30038.1	0.4619	30038.1	0.165731	30038.1	0.27529	30038.1	0.320856	30038.1	0.477835	30038.1	1.01279	30038.1	0.6993	30038.1	0.5	30038.1	0.391001	30038.1	0.21515
29967	0.18944	29967	0.55604	29967	0.245752	29967	0.5325	29967	0.253818	29967	0.20541	29967	0.241187	29967	0.454486	29967	1.02327	29967	0.7326	29967	0.5242	29967	0.378784	29967	0.26803
29896.3	0.23967	29896.3	0.63914	29896.3	0.251741	29896.3	0.5218	29896.3	0.3003	29896.3	0.30712	29896.3	0.316612	29896.3	0.576308	29896.3	1.03361	29896.3	0.8169	29896.3	0.4917	29896.3	0.446066	29896.3	0.27402
29825.8	0.214	29825.8	0.58354	29825.8	0.30563	29825.8	0.5539	29825.8	0.281876	29825.8	0.37832	29825.8	0.389433	29825.8	0.543881	29825.8	1.04365	29825.8	0.7975	29825.8	0.5141	29825.8	0.341448	29825.8	0.3236
29755.7	0.27053	29755.7	0.66074	29755.7	0.266219	29755.7	0.5831	29755.7	0.334448	29755.7	0.35201	29755.7	0.29875	29755.7	0.633902	29755.7	1.05333	29755.7	0.7977	29755.7	0.5518	29755.7	0.39383	29755.7	0.33989
29685.9	0.33324	29685.9	0.65224	29685.9	0.307408	29685.9	0.5935	29685.9	0.392714	29685.9	0.4019	29685.9	0.375061	29685.9	0.592334	29685.9	1.0625	29685.9	0.8471	29685.9	0.5822	29685.9	0.376613	29685.9	0.35087
29616.5	0.38686	29616.5	0.64084	29616.5	0.313998	29616.5	0.6343	29616.5	0.384076	29616.5	0.40078	29616.5	0.400268	29616.5	0.580431	29616.5	1.07121	29616.5	0.8454	29616.5	0.5959	29616.5	0.378995	29616.5	0.37576
29547.3	0.40767	29547.3	0.74774	29547.3	0.326487	29547.3	0.636	29547.3	0.426633	29547.3	0.41965	29547.3	0.39927	29547.3	0.627648	29547.3	1.07937	29547.3	0.7903	29547.3	0.5709	29547.3	0.511377	29547.3	0.38824
29479.4	0.41726	29479.4	0.71255	29479.4	0.410556	29479.4	0.6496	29479.4	0.400771	29479.4	0.406	29479.4	0.451254	29479.4	0.637484	29479.4	1.08687	29479.4	0.8311	29479.4	0.5814	29479.4	0.421558	29479.4	0.44572
29410.9	0.43346	29410.9	0.73765	29410.9	0.309445	29410.9	0.6599	29410.9	0.510918	29410.9	0.44096	29410.9	0.512547	29410.9	0.702569	29410.9	1.09397	29410.9	0.8568	29410.9	0.6546	29410.9	0.450041	29410.9	0.3792
29342.7	0.45886	29342.7	0.78265	29342.7	0.365534	29342.7	0.7109	29342.7	0.47826	29342.7	0.46581	29342.7	0.564035	29342.7	0.688912	29342.7	1.10072	29342.7	0.8904	29342.7	0.6444	29342.7	0.479723	29342.7	0.40567
29274.9	0.46966	29274.9	0.73195	29274.9	0.386623	29274.9	0.6786	29274.9	0.485097	29274.9	0.49295	29274.9	0.493119	29274.9	0.678127	29274.9	1.10707	29274.9	0.876	29274.9	0.6687	29274.9	0.465905	29274.9	0.43335
29207.3	0.45885	29207.3	0.77395	29207.3	0.391913	29207.3	0.7421	29207.3	0.51883	29207.3	0.56469	29207.3	0.550098	29207.3	0.803116	29207.3	1.11299	29207.3	0.8254	29207.3	0.6421	29207.3	0.493687	29207.3	0.46293
29140.1	0.44173	29140.1	0.82815	29140.1	0.404102	29140.1	0.7769	29140.1	0.544658	29140.1	0.52592	29140.1	0.586672	29140.1	0.664487	29140.1	1.11861	29140.1	0.8999	29140.1	0.6526	29140.1	0.48187	29140.1	0.51501
29074	0.5429	29074	0.84935	29074	0.369171	29074	0.7279	29074	0.567168	29074	0.58062	29074	0.54793	29074	0.714536	29074	1.12394	29074	0.919	29074	0.6641	29074	0.539151	29074	0.48198
29007.4	0.53598	29007.4	0.87165	29007.4	0.41696	29007.4	0.8094	29007.4	0.601086	29007.4	0.54704	29007.4	0.603396	29007.4	0.783789	29007.4	1.12912	29007.4	0.9262	29007.4	0.7079	29007.4	0.446733	29007.4	0.46226
28941	0.52695	28941	0.82765	28941	0.421349	28941	0.7546	28941	0.5666	28941	0.62055	28941	0.544757	28941	0.704643	28941	1.13405	28941	0.9104	28941	0.7524	28941	0.513615	28941	0.57223
28875	0.53342	28875	0.91305	28875	0.439538	28875	0.8066	28875	0.555309	28875	0.60425	28875	0.612214	28875	0.81769	28875	1.1387	28875	0.9002	28875	0.7105	28875	0.560298	28875	0.498
28809.3	0.55949	28809.3	0.81925	28809.3	0.429528	28809.3	0.7748	28809.3	0.603213	28809.3	0.63514	28809.3	0.656666	28809.3	0.763736	28809.3	1.14308	28809.3	0.935	28809.3	0.7112	28809.3	0.52768	28809.3	0.55118
28744.7	0.56654	28744.7	0.85745	28744.7	0.458897	28744.7	0.7905	28744.7	0.654	28744.7	0.56551	28744.7	0.619003	28744.7	0.801811	28744.7	1.14723	28744.7	0.9211	28744.7	0.6858	28744.7	0.573161	28744.7	0.50705
28679.6	0.54909	28679.6	0.88155	28679.6	0.434086	28679.6	0.8217	28679.6	0.648296	28679.6	0.6358	28679.6	0.721446	28679.6	0.828029	28679.6	1.15109	28679.6	0.9418	28679.6	0.7137	28679.6	0.516243	28679.6	0.51182
28614.8	0.60015	28614.8	0.86305	28614.8	0.488475	28614.8	0.7946	28614.8	0.666987	28614.8	0.60467	28614.8	0.655486	28614.8	0.833499	28614.8	1.15455	28614.8	0.9377	28614.8	0.7497	28614.8	0.557226	28614.8	0.53219
28550.2	0.582	28550.2	0.93715	28550.2	0.480664	28550.2	0.8553	28550.2	0.697273	28550.2	0.67654	28550.2	0.673322	28550.2	0.887151	28550.2	1.15768	28550.2	0.9614	28550.2	0.74	28550.2	0.572508	28550.2	0.55576
28486.8	0.56583	28486.8	0.87215	28486.8	0.478433	28486.8	0.8239	28486.8	0.667243	28486.8	0.56188	28486.8	0.673541	28486.8	0.868682	28486.8	1.16049	28486.8	0.9298	28486.8	0.76	28486.8	0.583189	28486.8	0.57672
28422.8	0.75027	28422.8	0.99586	28422.8	0.499422	28422.8	0.7839	28422.8	0.679221	28422.8	0.65684	28422.8	0.752168	28422.8	0.870995	28422.8	1.163	28422.8	0.9594	28422.8	0.7968	28422.8	0.704371	28422.8	0.55319
28359.1	0.63921	28359.1	0.91756	28359.1	0.485912	28359.1	0.8668	28359.1	0.699194	28359.1	0.65989	28359.1	0.778291	28359.1	0.907726	28359.1	1.16534	28359.1	0.9585	28359.1	0.8215	28359.1	0.595354	28359.1	0.58296
28295.7	0.63535	28295.7	0.98306	28295.7	0.523801	28295.7	0.8657	28295.7	0.733563	28295.7	0.68713	28295.7	0.70771	28295.7	0.907837	28295.7	1.16771	28295.7	0.9688	28295.7	0.8257	28295.7	0.594436	28295.7	0.60873
28233.4	0.64387	28233.4	0.95696	28233.4	0.52777	28233.4	0.8747	28233.4	0.748315	28233.4	0.74865	28233.4	0.705713	28233.4	0.94106	28233.4	1.17027	28233.4	0.9723	28233.4	0.8202	28233.4	0.623617	28233.4	0.60139
28170.6	0.67209	28170.6	0.94996	28170.6	0.520159	28170.6	0.9313	28170.6	0.744176	28170.6	0.65688	28170.6	0.758624	28170.6	0.868245	28170.6	1.17315	28170.6	1.0023	28170.6	0.8053	28170.6	0.606899	28170.6	0.58876
28108	0.69902	28108	0.99796	28108	0.539948	28108	0.9277	28108	0.788632	28108	0.7422	28108	0.75133	28108	0.902783	28108	1.17623	28108	1.0251	28108	0.7911	28108	0.645582	28108	0.62462
28045.8	0.69124	28045.8	0.97466	28045.8	0.540538	28045.8	0.8856	28045.8	0.778384	28045.8	0.71132	28045.8	0.758233	28045.8	0.876211	28045.8	1.17955	28045.8	1.0259	28045.8	0.839	28045.8	0.614664	28045.8	0.59488
27984.6	0.71564	27984.6	1.01526	27984.6	0.538807	27984.6	0.9216	27984.6	0.831019	27984.6	0.75651	27984.6	0.75972	27984.6	0.872013	27984.6	1.18305	27984.6	1.0315	27984.6	0.8241	27984.6	0.617645	27984.6	0.62824
27922.8	0.71956	27922.8	1.03726	27922.8	0.547196	27922.8	0.8812	27922.8	0.789463	27922.8	0.76701	27922.8	0.813215	27922.8	0.952529	27922.8	1.18676	27922.8	1.0448	27922.8	0.8462	27922.8	0.608627	27922.8	0.59851
27861.4	0.70247	27861.4	1.00796	27861.4	0.551985	27861.4	0.9191	27861.4	0.826402	27861.4	0.75121	27861.4	0.816906	27861.4	0.926389	27861.4	1.19052	27861.4	1.0375	27861.4	0.8319	27861.4	0.65641	27861.4	0.67067
27800.9	0.72656	27800.9	1.07816	27800.9	0.607954	27800.9	0.9274	27800.9	0.870226	27800.9	0.78638	27800.9	0.822981	27800.9	0.97196	27800.9	1.19426	27800.9	1.0703	27800.9	0.8492	27800.9	0.677291	27800.9	0.67983
27740	0.76006	27740	1.03296	27740	0.628743	27740	0.9396	27740	0.854457	27740	0.74427	27740	0.883264	27740	1.00606	27740	1.19811	27740	1.0702	27740	0.8382	27740	0.616073	27740	0.71349
27679.4	0.75886	27679.4	1.06896	27679.4	0.589832	27679.4	0.9561	27679.4	0.871884	27679.4	0.75585	27679.4	0.827544	27679.4	0.993363	27679.4	1.20205	27679.4	1.0609	27679.4	0.874	27679.4	0.683755	27679.4	0.68965
27619.7	0.74135	27619.7	1.08996	27619.7	0.644301	27619.7	0.949	27619.7	0.877796	27619.7	0.80661	27619.7	0.854008	27619.7	0.98557	27619.7	1.20602	27619.7	1.0734	27619.7	0.8832	27619.7	0.697637	27619.7	0.6825
27559.6	0.73904	27559.6	1.03206	27559.6	0.610091	27559.6	1.0051	27559.6	0.899015	27559.6	0.82188	27559.6	0.847279	27559.6	0.950278	27559.6	1.20998	27559.6	1.0771	27559.6	0.8888	27559.6	0.677719	27559.6	0.72636
27499.7	0.75253	27499.7	1.09186	27499.7	0.64118	27499.7	0.9619	27499.7	0.89313	27499.7	0.79744	27499.7	0.903947	27499.7	1.05925	27499.7	1.2137	27499.7	1.0828	27499.7	0.8997	27499.7	0.745201	27499.7	0.69532
27440.9	0.7703	27440.9	1.09367	27440.9	0.633349	27440.9	0.9951	27440.9	0.955929	27440.9	0.82638	27440.9	0.898	27440.9	0.990852	27440.9	1.21706	27440.9	1.0681	27440.9	0.9096	27440.9	0.714582	27440.9	0.72767
27381.5	0.81158	27381.5	1.12397	27381.5	0.661238	27381.5	0.9569	27381.5	0.928837	27381.5	0.82793	27381.5	0.905361	27381.5	1.03188	27381.5	1.22013	27381.5	1.0907	27381.5	0.9025	27381.5	0.716365	27381.5	0.71793
27322.4	0.79246	27322.4	1.13347	27322.4	0.659027	27322.4	1.0893	27322.4	0.93514	27322.4	0.87587	27322.4	0.895017	27322.4	1.04984	27322.4	1.22279	27322.4	1.1836	27322.4	0.8952	27322.4	0.840947	27322.4	0.71739
27264.3	0.78863	27264.3	1.15347	27264.3	0.663796	27264.3	0.9787	27264.3	0.990928	27264.3	0.87429	27264.3	0.910959	27264.3	0.98267	27264.3	1.225	27264.3	1.1019	27264.3	0.9129	27264.3	0.720728	27264.3	0.77174
27205.7	0.8229	27205.7	1.12907	27205.7	0.673686	27205.7	1.0084	27205.7	0.968024	27205.7	0.87923	27205.7	0.964509	27205.7	1.06676	27205.7	1.22685	27205.7	1.0988	27205.7	0.9271	27205.7	0.75271	27205.7	0.73109
27148.1	0.83456	27148.1	1.10647	27148.1	0.688155	27148.1	1.0273	27148.1	0.990104	27148.1	0.88474	27148.1	0.967444	27148.1	1.04736	27148.1	1.22835	27148.1	1.1366	27148.1	0.9527	27148.1	0.735691	27148.1	0.75694
27090	0.82972	27090	1.16187	27090	0.670044	27090	1.0267	27090	0.988992	27090	0.87766	27090	0.922286	27090	1.05305	27090	1.22963	27090	1.1208	27090	0.9651	27090	0.781774	27090	0.7777
27032.1	0.81298	27032.1	1.17157	27032.1	0.702033	27032.1	1.051	27032.1	1.01628	27032.1	0.90208	27032.1	0.947324	27032.1	1.10829	27032.1	1.23084	27032.1	1.156	27032.1	0.9755	27032.1	0.752156	27032.1	0.76595
26975.3	0.86773	26975.3	1.14897	26975.3	0.714102	26975.3	1.012	26975.3	1.00925	26975.3	0.90127	26975.3	0.951349	26975.3	1.06836	26975.3	1.23199	26975.3	1.1347	26975.3	0.9676	26975.3	0.781737	26975.3	0.7989
26917.9	0.85149	26917.9	1.14037	26917.9	0.690891	26917.9	1.0538	26917.9	1.05742	26917.9	0.93147	26917.9	0.97948	26917.9	1.12844	26917.9	1.23306	26917.9	1.1182	26917.9	0.9637	26917.9	0.785719	26917.9	0.68535
26861.5	0.86823	26861.5	1.17927	26861.5	0.73736	26861.5	1.0385	26861.5	1.06748	26861.5	0.93206	26861.5	1.0202	26861.5	1.12438	26861.5	1.23403	26861.5	1.1507	26861.5	0.9733	26861.5	0.796101	26861.5	0.8279
26804.6	0.83168	26804.6	1.21847	26804.6	0.70715	26804.6	1.0385	26804.6	1.06805	26804.6	0.90375	26804.6	0.986522	26804.6	1.13987	26804.6	1.23497	26804.6	1.1411	26804.6	0.994	26804.6	0.798383	26804.6	0.81945
26748	0.88702	26748	1.18187	26748	0.740139	26748	1.0747	26748	1.04752	26748	0.94144	26748	1.02834	26748	1.1511	26748	1.23598	26748	1.141	26748	1.0123	26748	0.811065	26748	0.80209
26692.3	0.88866	26692.3	1.23987	26692.3	0.750008	26692.3	1.0526	26692.3	1.08267	26692.3	0.93721	26692.3	0.99915	26692.3	1.13211	26692.3	1.23711	26692.3	1.1463	26692.3	1.0153	26692.3	0.818846	26692.3	0.83404
26636.1	0.9118	26636.1	1.25127	26636.1	0.759497	26636.1	1.0618	26636.1	1.07923	26636.1	0.98748	26636.1	1.03636	26636.1	1.09255	26636.1	1.23836	26636.1	1.1039	26636.1	1.001	26636.1	0.844729	26636.1	0.86969
26580.9	0.92062	26580.9	1.21177	26580.9	0.775066	26580.9	1.0703	26580.9	1.12607	26580.9	0.93834	26580.9	1.01736	26580.9	1.14536	26580.9	1.23972	26580.9	1.1588	26580.9	1.0009	26580.9	0.83191	26580.9	0.83733
26525.2	0.91386	26525.2	1.23198	26525.2	0.780155	26525.2	1.0732	26525.2	1.11073	26525.2	0.95731	26525.2	1.00557	26525.2	1.15933	26525.2	1.2412	26525.2	1.1636	26525.2	1.0215	26525.2	0.839892	26525.2	0.84288
26470.4	0.92718	26470.4	1.22468	26470.4	0.777424	26470.4	1.0881	26470.4	1.11436	26470.4	0.97365	26470.4	1.07237	26470.4	1.1435	26470.4	1.24271	26470.4	1.1867	26470.4	1.0097	26470.4	0.840573	26470.4	0.84582
26415.2	0.91861	26415.2	1.27088	26415.2	0.783614	26415.2	1.102	26415.2	1.12061	26415.2	0.98761	26415.2	1.02227	26415.2	1.14514	26415.2	1.24419	26415.2	1.1655	26415.2	1.0411	26415.2	0.859556	26415.2	0.87687
26360.9	0.90932	26360.9	1.25158	26360.9	0.763783	26360.9	1.0796	26360.9	1.15664	26360.9	1.00195	26360.9	1.05345	26360.9	1.17827	26360.9	1.24558	26360.9	1.1671	26360.9	1.0409	26360.9	0.872737	26360.9	0.87491
26306.1	0.95194	26306.1	1.27338	26306.1	0.808572	26306.1	1.0979	26306.1	1.21447	26306.1	0.99909	26306.1	1.06415	26306.1	1.19232	26306.1	1.24687	26306.1	1.1737	26306.1	1.0436	26306.1	0.879219	26306.1	0.88326
26252.2	0.94995	26252.2	1.29128	26252.2	0.787441	26252.2	1.0952	26252.2	1.1783	26252.2	1.00322	26252.2	1.07473	26252.2	1.19297	26252.2	1.24802	26252.2	1.1897	26252.2	1.0469	26252.2	0.8701	26252.2	0.8804
26197.9	0.94657	26197.9	1.29018	26197.9	0.80163	26197.9	1.1076	26197.9	1.10213	26197.9	1.01815	26197.9	1.10262	26197.9	1.19543	26197.9	1.24903	26197.9	1.1757	26197.9	1.0379	26197.9	0.931283	26197.9	0.79994
26144.5	0.94377	26144.5	1.28418	26144.5	0.830299	26144.5	1.1096	26144.5	1.22204	26144.5	1.03037	26144.5	1.07569	26144.5	1.16733	26144.5	1.24992	26144.5	1.1666	26144.5	1.0573	26144.5	0.883964	26144.5	0.90528
26090.6	0.94428	26090.6	1.30848	26090.6	0.811488	26090.6	1.092	26090.6	1.19517	26090.6	1.0011	26090.6	1.10457	26090.6	1.22531	26090.6	1.25068	26090.6	1.1886	26090.6	1.0516	26090.6	0.884646	26090.6	0.91032
26037.6	0.95018	26037.6	1.31168	26037.6	0.809357	26037.6	1.1393	26037.6	1.22958	26037.6	1.0195	26037.6	1.10424	26037.6	1.19907	26037.6	1.2513	26037.6	1.1805	26037.6	1.0604	26037.6	0.888327	26037.6	0.92556
25984.1	0.95828	25984.1	1.30558	25984.1	0.826447	25984.1	1.0998	25984.1	1.23479	25984.1	1.01262	25984.1	1.10631	25984.1	1.23502	25984.1	1.25181	25984.1	1.1924	25984.1	1.0607	25984.1	0.90221	25984.1	0.9351
25931.6	0.96287	25931.6	1.31468	25931.6	0.825916	25931.6	1.1335	25931.6	1.2149	25931.6	1.03371	25931.6	1.11138	25931.6	1.21099	25931.6	1.25223	25931.6	1.1972	25931.6	1.0802	25931.6	0.912491	25931.6	0.92534
25878.6	0.97917	25878.6	1.31838	25878.6	0.847405	25878.6	1.1322	25878.6	1.24151	25878.6	1.04642	25878.6	1.12054	25878.6	1.21855	25878.6	1.25261	25878.6	1.1993	25878.6	1.0686	25878.6	0.918073	25878.6	0.95388
25826.4	0.97546	25826.4	1.32128	25826.4	0.835474	25826.4	1.0719	25826.4	1.27621	25826.4	1.04271	25826.4	1.1136	25826.4	1.23866	25826.4	1.25296	25826.4	1.1986	25826.4	1.0757	25826.4	0.914954	25826.4	0.94052
25773.9	0.98355	25773.9	1.33038	25773.9	0.846863	25773.9	1.1256	25773.9	1.23931	25773.9	1.0455	25773.9	1.11966	25773.9	1.22316	25773.9	1.25328	25773.9	1.1933	25773.9	1.0889	25773.9	0.913036	25773.9	0.95286
25722.1	0.97333	25722.1	1.34178	25722.1	0.848432	25722.1	1.1387	25722.1	1.2858	25722.1	1.03488	25722.1	1.12211	25722.1	1.23377	25722.1	1.25359	25722.1	1.1929	25722.1	1.0991	25722.1	0.904718	25722.1	0.93759
25670	0.96692	25670	1.31589	25670	0.848721	25670	1.1357	25670	1.269	25670	1.06346	25670	1.14767	25670	1.24142	25670	1.25389	25670	1.205	25670	1.1072	25670	0.9214	25670	0.94513
25618.7	0.97139	25618.7	1.35689	25618.7	0.85199	25618.7	1.1427	25618.7	1.25888	25618.7	1.04413	25618.7	1.12861	25618.7	1.24533	25618.7	1.25418	25618.7	1.2056	25618.7	1.0986	25618.7	0.927181	25618.7	0.96426
25567.6	0.98317	25567.6	1.34159	25567.6	0.865059	25567.6	1.139	25567.6	1.27796	25567.6	1.06079	25567.6	1.13245	25567.6	1.25841	25567.6	1.25447	25567.6	1.2075	25567.6	1.1026	25567.6	0.928862	25567.6	0.97
25516.1	1.00074	25516.1	1.34799	25516.1	0.869249	25516.1	1.1392	25516.1	1.28125	25516.1	1.05307	25516.1	1.1428	25516.1	1.25834	25516.1	1.25473	25516.1	1.2186	25516.1	1.1035	25516.1	0.931345	25516.1	0.97653
25465.4	1.01481	25465.4	1.35879	25465.4	0.874618	25465.4	1.1525	25465.4	1.27692	25465.4	1.06882	25465.4	1.16343	25465.4	1.24706	25465.4	1.25491	25465.4	1.21	25465.4	1.1059	25465.4	0.937226	25465.4	0.97587
25414.3	0.99238	25414.3	1.35129	25414.3	0.880507	25414.3	1.1488	25414.3	1.29941	25414.3	1.08068	25414.3	1.16027	25414.3	1.25329	25414.3	1.25499	25414.3	1.2185	25414.3	1.1135	25414.3	0.942108	25414.3	0.9786
25364	1.00425	25364	1.35999	25364	0.882476	25364	1.1554	25364	1.30967	25364	1.07513	25364	1.1497	25364	1.25099	25364	1.255	25364	1.2189	25364	1.1115	25364	0.949989	25364	0.97673
25313.9	1.00801	25313.9	1.34699	25313.9	0.877145	25313.9	1.1525	25313.9	1.31654	25313.9	1.09027	25313.9	1.17313	25313.9	1.26402	25313.9	1.25498	25313.9	1.2071	25313.9	1.1176	25313.9	0.956371	25313.9	0.99006
25263.4	1.00877	25263.4	1.36999	25263.4	0.887834	25263.4	1.1563	25263.4	1.30791	25263.4	1.08602	25263.4	1.18426	25263.4	1.26751	25263.4	1.25498	25263.4	1.2173	25263.4	1.1174	25263.4	0.948753	25263.4	1.0001
25213.7	1.01052	25213.7	1.36449	25213.7	0.898503	25213.7	1.1576	25213.7	1.31427	25213.7	1.09455	25213.7	1.16888	25213.7	1.27551	25213.7	1.25499	25213.7	1.2153	25213.7	1.1208	25213.7	0.957134	25213.7	1.00263
25163.6	1.00918	25163.6	1.36859	25163.6	0.893393	25163.6	1.1484	25163.6	1.33174	25163.6	1.07769	25163.6	1.18751	25163.6	1.26899	25163.6	1.25497	25163.6	1.2069	25163.6	1.1298	25163.6	0.951516	25163.6	1.00226
25114.3	1.02493	25114.3	1.36769	25114.3	0.902062	25114.3	1.1607	25114.3	1.32549	25114.3	1.09461	25114.3	1.17212	25114.3	1.27612	25114.3	1.25492	25114.3	1.2188	25114.3	1.1247	25114.3	0.958197	25114.3	1.00069
25065.2	1.06878	25065.2	1.38099	25065.2	0.903431	25065.2	1.1736	25065.2	1.33844	25065.2	1.05562	25065.2	1.24373	25065.2	1.24688	25065.2	1.25484	25065.2	1.1874	25065.2	1.1241	25065.2	0.956679	25065.2	1.00482
25015.6	1.02713	25015.6	1.38739	25015.6	0.91382	25015.6	1.1585	25015.6	1.3304	25015.6	1.10345	25015.6	1.18195	25015.6	1.27146	25015.6	1.25472	25015.6	1.2122	25015.6	1.1374	25015.6	0.964961	25015.6	1.01655
24966.9	1.02797	24966.9	1.37759	24966.9	0.911889	24966.9	1.1571	24966.9	1.34464	24966.9	1.10126	24966.9	1.19286	24966.9	1.28093	24966.9	1.25458	24966.9	1.2234	24966.9	1.1276	24966.9	0.961242	24966.9	1.00938
24918.4	1.02811	24918.4	1.37789	24918.4	0.917558	24918.4	1.1672	24918.4	1.35148	24918.4	1.10536	24918.4	1.18826	24918.4	1.2803	24918.4	1.25447	24918.4	1.2214	24918.4	1.1369	24918.4	0.968423	24918.4	1.0219
24869.4	1.01676	24869.4	1.3829	24869.4	0.922847	24869.4	1.16	24869.4	1.34233	24869.4	1.09368	24869.4	1.18167	24869.4	1.29044	24869.4	1.25442	24869.4	1.2213	24869.4	1.1459	24869.4	0.969206	24869.4	1.01553
24821.3	1.04199	24821.3	1.3924	24821.3	0.905816	24821.3	1.1604	24821.3	1.39287	24821.3	1.09337	24821.3	1.19277	24821.3	1.28884	24821.3	1.25443	24821.3	1.209	24821.3	1.1396	24821.3	0.963587	24821.3	1.02656
24773.3	1.03002	24773.3	1.3875	24773.3	0.926085	24773.3	1.1775	24773.3	1.3621	24773.3	1.11106	24773.3	1.19036	24773.3	1.28824	24773.3	1.25448	24773.3	1.2285	24773.3	1.1443	24773.3	0.972068	24773.3	1.03589
24724.9	1.04016	24724.9	1.394	24724.9	0.924875	24724.9	1.1654	24724.9	1.36164	24724.9	1.11276	24724.9	1.18976	24724.9	1.29961	24724.9	1.25458	24724.9	1.232	24724.9	1.1474	24724.9	0.97405	24724.9	1.03361
24677.3	1.03429	24677.3	1.3931	24677.3	0.927944	24677.3	1.1769	24677.3	1.34877	24677.3	1.11605	24677.3	1.21505	24677.3	1.28281	24677.3	1.25471	24677.3	1.2284	24677.3	1.137	24677.3	0.973732	24677.3	1.03324
24629.9	1.03401	24629.9	1.3828	24629.9	0.925313	24629.9	1.1677	24629.9	1.36879	24629.9	1.11373	24629.9	1.19774	24629.9	1.29342	24629.9	1.2549	24629.9	1.2283	24629.9	1.1418	24629.9	0.967213	24629.9	1.02886
24582.1	1.03484	24582.1	1.3811	24582.1	0.926702	24582.1	1.1703	24582.1	1.38392	24582.1	1.13041	24582.1	1.19953	24582.1	1.28823	24582.1	1.25517	24582.1	1.2307	24582.1	1.1502	24582.1	0.976695	24582.1	1.02779
24535.1	1.04676	24535.1	1.3964	24535.1	0.933771	24535.1	1.1712	24535.1	1.38794	24535.1	1.11878	24535.1	1.20202	24535.1	1.28544	24535.1	1.25556	24535.1	1.2294	24535.1	1.141	24535.1	0.975076	24535.1	1.03731
24488.2	1.04858	24488.2	1.4055	24488.2	0.94414	24488.2	1.1714	24488.2	1.38566	24488.2	1.11545	24488.2	1.2251	24488.2	1.30341	24488.2	1.25607	24488.2	1.2369	24488.2	1.1385	24488.2	0.977157	24488.2	1.04883
24441.5	1.04459	24441.5	1.4011	24441.5	0.939709	24441.5	1.1737	24441.5	1.38547	24441.5	1.12981	24441.5	1.22087	24441.5	1.29996	24441.5	1.25668	24441.5	1.2299	24441.5	1.1526	24441.5	0.974139	24441.5	1.04286
24394.4	1.04871	24394.4	1.4066	24394.4	0.948298	24394.4	1.1676	24394.4	1.37749	24394.4	1.13308	24394.4	1.21215	24394.4	1.30405	24394.4	1.25736	24394.4	1.2327	24394.4	1.1542	24394.4	0.983221	24394.4	1.04058
24348.1	1.05282	24348.1	1.3913	24348.1	0.947667	24348.1	1.1837	24348.1	1.3828	24348.1	1.12474	24348.1	1.21063	24348.1	1.31462	24348.1	1.25806	24348.1	1.2388	24348.1	1.1473	24348.1	0.983402	24348.1	1.0567
24301.9	1.05553	24301.9	1.4124	24301.9	0.953236	24301.9	1.1795	24301.9	1.38151	24301.9	1.11909	24301.9	1.2172	24301.9	1.30279	24301.9	1.25874	24301.9	1.2331	24301.9	1.1645	24301.9	0.985283	24301.9	1.05352
24255.9	1.04543	24255.9	1.398	24255.9	0.955305	24255.9	1.1858	24255.9	1.39251	24255.9	1.14113	24255.9	1.22386	24255.9	1.31297	24255.9	1.25938	24255.9	1.2499	24255.9	1.1642	24255.9	0.978365	24255.9	1.05695
24209.6	1.05725	24209.6	1.4066	24209.6	0.957895	24209.6	1.1755	24209.6	1.40202	24209.6	1.13379	24209.6	1.23313	24209.6	1.29657	24209.6	1.25996	24209.6	1.2358	24209.6	1.154	24209.6	0.981547	24209.6	1.05997
24163.9	1.05685	24163.9	1.41591	24163.9	0.966864	24163.9	1.1915	24163.9	1.40502	24163.9	1.14533	24163.9	1.22	24163.9	1.31885	24163.9	1.26046	24163.9	1.244	24163.9	1.1615	24163.9	0.988228	24163.9	1.05589
24118.5	1.05734	24118.5	1.40651	24118.5	0.971433	24118.5	1.1813	24118.5	1.39331	24118.5	1.14856	24118.5	1.23015	24118.5	1.32568	24118.5	1.26087	24118.5	1.2393	24118.5	1.1628	24118.5	0.983609	24118.5	1.06471
24073.2	1.07984	24073.2	1.41211	24073.2	0.961202	24073.2	1.1938	24073.2	1.4149	24073.2	1.14949	24073.2	1.22921	24073.2	1.31044	24073.2	1.2612	24073.2	1.2396	24073.2	1.1575	24073.2	0.98579	24073.2	1.06733
24027.5	1.07004	24027.5	1.41071	24027.5	0.976691	24027.5	1.1911	24027.5	1.4128	24027.5	1.14633	24027.5	1.23547	24027.5	1.31623	24027.5	1.26144	24027.5	1.2437	24027.5	1.1651	24027.5	0.991773	24027.5	1.06235
23982.5	1.07533	23982.5	1.41841	23982.5	0.98386	23982.5	1.1927	23982.5	1.42329	23982.5	1.15655	23982.5	1.23672	23982.5	1.34258	23982.5	1.26159	23982.5	1.2403	23982.5	1.1603	23982.5	0.993054	23982.5	1.05376
23937.8	1.07602	23937.8	1.41441	23937.8	0.982329	23937.8	1.1984	23937.8	1.40827	23937.8	1.15517	23937.8	1.22677	23937.8	1.31848	23937.8	1.26165	23937.8	1.2427	23937.8	1.1733	23937.8	0.998235	23937.8	1.07308
23893.1	1.07591	23893.1	1.42251	23893.1	0.990698	23893.1	1.1916	23893.1	1.41876	23893.1	1.15179	23893.1	1.25052	23893.1	1.32918	23893.1	1.26159	23893.1	1.238	23893.1	1.1689	23893.1	0.994616	23893.1	1.0807
23848.7	1.075	23848.7	1.41701	23848.7	0.990167	23848.7	1.1976	23848.7	1.43173	23848.7	1.1577	23848.7	1.23766	23848.7	1.31876	23848.7	1.26144	23848.7	1.2419	23848.7	1.1745	23848.7	0.996798	23848.7	1.07522
23804.4	1.07858	23804.4	1.42061	23804.4	0.989036	23804.4	1.1929	23804.4	1.43641	23804.4	1.15461	23804.4	1.24221	23804.4	1.33508	23804.4	1.26122	23804.4	1.239	23804.4	1.1766	23804.4	0.994279	23804.4	1.08053
23759.7	1.08347	23759.7	1.43251	23759.7	0.988326	23759.7	1.2004	23759.7	1.44139	23759.7	1.16022	23759.7	1.25035	23759.7	1.31279	23759.7	1.26099	23759.7	1.2449	23759.7	1.1717	23759.7	1.00406	23759.7	1.08165
23715.8	1.08405	23715.8	1.41551	23715.8	0.994395	23715.8	1.2008	23715.8	1.44317	23715.8	1.16382	23715.8	1.24379	23715.8	1.33783	23715.8	1.26078	23715.8	1.2459	23715.8	1.1707	23715.8	1.00444	23715.8	1.08427
23672	1.08802	23672	1.41231	23672	0.999964	23672	1.2046	23672	1.44044	23672	1.16892	23672	1.24633	23672	1.32702	23672	1.26061	23672	1.2452	23672	1.1717	23672	0.998924	23672	1.09148
23628.4	1.0864	23628.4	1.41961	23628.4	0.998233	23628.4	1.1978	23628.4	1.4422	23628.4	1.17031	23628.4	1.25256	23628.4	1.33114	23628.4	1.26052	23628.4	1.2402	23628.4	1.1719	23628.4	0.999005	23628.4	1.09089
23584.9	1.08297	23584.9	1.41951	23584.9	1.0023	23584.9	1.2039	23584.9	1.44007	23584.9	1.1668	23584.9	1.25419	23584.9	1.33953	23584.9	1.26052	23584.9	1.2463	23584.9	1.1801	23584.9	0.997886	23584.9	1.09691
23541.6	1.08534	23541.6	1.41551	23541.6	1.00637	23541.6	1.2116	23541.6	1.45263	23541.6	1.17669	23541.6	1.26902	23541.6	1.33312	23541.6	1.26059	23541.6	1.2476	23541.6	1.1803	23541.6	0.999967	23541.6	1.10172
23497.9	1.08851	23497.9	1.41821	23497.9	1.00716	23497.9	1.198	23497.9	1.437	23497.9	1.17008	23497.9	1.26525	23497.9	1.3462	23497.9	1.26072	23497.9	1.2437	23497.9	1.1844	23497.9	0.998049	23497.9	1.09604
23454.9	1.09848	23454.9	1.43272	23454.9	1.01003	23454.9	1.209	23454.9	1.43325	23454.9	1.18126	23454.9	1.26557	23454.9	1.33295	23454.9	1.26088	23454.9	1.2454	23454.9	1.1726	23454.9	1.00113	23454.9	1.09635
23412.1	1.08954	23412.1	1.42722	23412.1	1.0127	23412.1	1.2083	23412.1	1.44201	23412.1	1.17163	23412.1	1.26649	23412.1	1.33247	23412.1	1.26103	23412.1	1.2387	23412.1	1.1799	23412.1	1.00461	23412.1	1.10966
23369.4	1.09541	23369.4	1.42282	23369.4	1.01487	23369.4	1.2091	23369.4	1.45046	23369.4	1.1868	23369.4	1.26621	23369.4	1.34832	23369.4	1.26118	23369.4	1.241	23369.4	1.1842	23369.4	1.00169	23369.4	1.10608
23326.9	1.09517	23326.9	1.42672	23326.9	1.01534	23326.9	1.2081	23326.9	1.45291	23326.9	1.18187	23326.9	1.26923	23326.9	1.33909	23326.9	1.26136	23326.9	1.2375	23326.9	1.1839	23326.9	1.00347	23326.9	1.11069
23284.5	1.10172	23284.5	1.42552	23284.5	1.01841	23284.5	1.2054	23284.5	1.46396	23284.5	1.18563	23284.5	1.26644	23284.5	1.33977	23284.5	1.26159	23284.5	1.2385	23284.5	1.1839	23284.5	1.00546	23284.5	1.1097
23242.3	1.10218	23242.3	1.43172	23242.3	1.01837	23242.3	1.2125	23242.3	1.4524	23242.3	1.18129	23242.3	1.27095	23242.3	1.34555	23242.3	1.26186	23242.3	1.2378	23242.3	1.1826	23242.3	1.00534	23242.3	1.11501
23200.2	1.10473	23200.2	1.43062	23200.2	1.02644	23200.2	1.2098	23200.2	1.47855	23200.2	1.19525	23200.2	1.26766	23200.2	1.34874	23200.2	1.26214	23200.2	1.2326	23200.2	1.1851	23200.2	1.00622	23200.2	1.11722
23158.3	1.10399	23158.3	1.42062	23158.3	1.02311	23158.3	1.217	23158.3	1.46839	23158.3	1.18931	23158.3	1.26847	23158.3	1.36036	23158.3	1.26242	23158.3	1.2319	23158.3	1.1899	23158.3	1.0078	23158.3	1.11603
23116.6	1.10534	23116.6	1.44022	23116.6	1.02818	23116.6	1.2136	23116.6	1.46612	23116.6	1.18906	23116.6	1.27818	23116.6	1.34579	23116.6	1.26267	23116.6	1.2289	23116.6	1.1896	23116.6	1.00978	23116.6	1.12354
23074.4	1.10349	23074.4	1.42582	23074.4	1.02767	23074.4	1.213	23074.4	1.45867	23074.4	1.19461	23074.4	1.27429	23074.4	1.35267	23074.4	1.26289	23074.4	1.2318	23074.4	1.1912	23074.4	1.00626	23074.4	1.11225
23033	1.10584	23033	1.43412	23033	1.02954	23033	1.2116	23033	1.4722	23033	1.19206	23033	1.28539	23033	1.34615	23033	1.26307	23033	1.2286	23033	1.1924	23033	1.00864	23033	1.12146
22991.7	1.11308	22991.7	1.42752	22991.7	1.03241	22991.7	1.2184	22991.7	1.46443	22991.7	1.202	22991.7	1.27599	22991.7	1.36228	22991.7	1.2632	22991.7	1.2259	22991.7	1.1913	22991.7	1.00973	22991.7	1.12087
22950.5	1.11272	22950.5	1.43452	22950.5	1.03388	22950.5	1.2171	22950.5	1.48586	22950.5	1.19613	22950.5	1.28278	22950.5	1.35339	22950.5	1.26328	22950.5	1.2283	22950.5	1.1981	22950.5	1.01851	22950.5	1.12058
22909.5	1.11026	22909.5	1.43192	22909.5	1.03325	22909.5	1.2235	22909.5	1.48789	22909.5	1.20807	22909.5	1.28298	22909.5	1.3549	22909.5	1.26333	22909.5	1.2208	22909.5	1.2001	22909.5	1.00759	22909.5	1.12498
22868.6	1.1144	22868.6	1.43392	22868.6	1.03812	22868.6	1.2206	22868.6	1.48621	22868.6	1.2041	22868.6	1.27957	22868.6	1.36009	22868.6	1.26337	22868.6	1.2141	22868.6	1.2035	22868.6	1.01377	22868.6	1.11919
22827.9	1.13594	22827.9	1.44112	22827.9	1.01779	22827.9	1.2378	22827.9	1.51794	22827.9	1.22792	22827.9	1.29056	22827.9	1.34931	22827.9	1.26339	22827.9	1.2111	22827.9	1.2048	22827.9	1.01425	22827.9	1.1613
22787.3	1.12257	22787.3	1.43563	22787.3	1.03965	22787.3	1.2411	22787.3	1.52276	22787.3	1.20185	22787.3	1.26055	22787.3	1.36482	22787.3	1.26338	22787.3	1.2178	22787.3	1.2027	22787.3	1.01483	22787.3	1.13541
22746.9	1.1177	22746.9	1.43333	22746.9	1.03422	22746.9	1.2216	22746.9	1.48967	22746.9	1.21537	22746.9	1.29323	22746.9	1.36243	22746.9	1.26335	22746.9	1.2039	22746.9	1.2011	22746.9	1.01571	22746.9	1.13691
22706.6	1.11313	22706.6	1.43113	22706.6	1.02829	22706.6	1.2285	22706.6	1.48559	22706.6	1.21368	22706.6	1.29142	22706.6	1.35373	22706.6	1.26328	22706.6	1.1924	22706.6	1.2087	22706.6	1.01449	22706.6	1.13952
22666.5	1.12226	22666.5	1.44513	22666.5	1.01926	22666.5	1.2251	22666.5	1.4871	22666.5	1.21369	22666.5	1.293	22666.5	1.3634	22666.5	1.26319	22666.5	1.1838	22666.5	1.2107	22666.5	1.01587	22666.5	1.14142
22626.5	1.12119	22626.5	1.44403	22626.5	1.01223	22626.5	1.2246	22626.5	1.49172	22626.5	1.2123	22626.5	1.30038	22626.5	1.36727	22626.5	1.26307	22626.5	1.1766	22626.5	1.208	22626.5	1.02226	22626.5	1.14423
22586.6	1.12121	22586.6	1.44563	22586.6	1.0009	22586.6	1.23	22586.6	1.48393	22586.6	1.21401	22586.6	1.29996	22586.6	1.36344	22586.6	1.26295	22586.6	1.1698	22586.6	1.2005	22586.6	1.01174	22586.6	1.14593
22546.9	1.13104	22546.9	1.43863	22546.9	0.990969	22546.9	1.2288	22546.9	1.49283	22546.9	1.22522	22546.9	1.29793	22546.9	1.37388	22546.9	1.26283	22546.9	1.1627	22546.9	1.209	22546.9	1.01802	22546.9	1.14214
22507.3	1.14066	22507.3	1.43793	22507.3	0.972538	22507.3	1.2411	22507.3	1.46834	22507.3	1.24322	22507.3	1.31511	22507.3	1.35092	22507.3	1.26274	22507.3	1.1522	22507.3	1.217	22507.3	1.0147	22507.3	1.11734
22467.9	1.13598	22467.9	1.44973	22467.9	0.956407	22467.9	1.2274	22467.9	1.50534	22467.9	1.23231	22467.9	1.30298	22467.9	1.37168	22467.9	1.26267	22467.9	1.1437	22467.9	1.212	22467.9	1.01828	22467.9	1.14425
22428.6	1.13119	22428.6	1.44543	22428.6	0.930076	22428.6	1.231	22428.6	1.49174	22428.6	1.22871	22428.6	1.31205	22428.6	1.36612	22428.6	1.26265	22428.6	1.1349	22428.6	1.2069	22428.6	1.01846	22428.6	1.14955
22389.4	1.13121	22389.4	1.44663	22389.4	0.905945	22389.4	1.2266	22389.4	1.49154	22389.4	1.2364	22389.4	1.29942	22389.4	1.37837	22389.4	1.26266	22389.4	1.1296	22389.4	1.2092	22389.4	1.02144	22389.4	1.15035
22350.4	1.13722	22350.4	1.44023	22350.4	0.877214	22350.4	1.2308	22350.4	1.49274	22350.4	1.22369	22350.4	1.30788	22350.4	1.37536	22350.4	1.26267	22350.4	1.1228	22350.4	1.2092	22350.4	1.01202	22350.4	1.15015
22312	1.13893	22312	1.43843	22312	0.846463	22312	1.23	22312	1.49022	22312	1.23416	22312	1.30474	22312	1.37355	22312	1.26265	22312	1.1169	22312	1.213	22312	1.0226	22312	1.13896
22273.2	1.14764	22273.2	1.44303	22273.2	0.813732	22273.2	1.2323	22273.2	1.50612	22273.2	1.23594	22273.2	1.3111	22273.2	1.37558	22273.2	1.26258	22273.2	1.113	22273.2	1.2203	22273.2	1.02419	22273.2	1.15156
22234.6	1.14675	22234.6	1.45083	22234.6	0.780501	22234.6	1.2414	22234.6	1.51441	22234.6	1.23912	22234.6	1.31606	22234.6	1.38048	22234.6	1.26246	22234.6	1.1097	22234.6	1.2253	22234.6	1.02687	22234.6	1.15696
22196.1	1.14665	22196.1	1.45593	22196.1	0.75177	22196.1	1.2371	22196.1	1.51059	22196.1	1.2458	22196.1	1.32022	22196.1	1.38531	22196.1	1.26228	22196.1	1.1032	22196.1	1.2249	22196.1	1.02645	22196.1	1.15956
22157.7	1.14876	22157.7	1.45374	22157.7	0.71684	22157.7	1.2435	22157.7	1.51268	22157.7	1.23807	22157.7	1.31467	22157.7	1.38851	22157.7	1.26204	22157.7	1.0979	22157.7	1.2193	22157.7	1.02533	22157.7	1.16036
22119.5	1.14736	22119.5	1.45764	22119.5	0.681709	22119.5	1.2336	22119.5	1.50656	22119.5	1.24104	22119.5	1.31333	22119.5	1.38265	22119.5	1.26176	22119.5	1.0928	22119.5	1.2192	22119.5	1.02831	22119.5	1.16386
22081.4	1.14526	22081.4	1.45314	22081.4	0.643878	22081.4	1.2397	22081.4	1.51315	22081.4	1.23711	22081.4	1.31828	22081.4	1.38432	22081.4	1.26146	22081.4	1.0857	22081.4	1.2239	22081.4	1.02809	22081.4	1.16426
22043.4	1.14446	22043.4	1.45074	22043.4	0.613747	22043.4	1.2329	22043.4	1.49763	22043.4	1.24177	22043.4	1.32053	22043.4	1.37892	22043.4	1.26117	22043.4	1.0773	22043.4	1.2191	22043.4	1.02447	22043.4	1.16356
22005.6	1.14466	22005.6	1.45304	22005.6	0.581516	22005.6	1.2318	22005.6	1.50361	22005.6	1.24353	22005.6	1.30828	22005.6	1.39137	22005.6	1.26088	22005.6	1.077	22005.6	1.2216	22005.6	1.02555	22005.6	1.16456
21967.9	1.14986	21967.9	1.45424	21967.9	0.556985	21967.9	1.2304	21967.9	1.50528	21967.9	1.24259	21967.9	1.31712	21967.9	1.38798	21967.9	1.26063	21967.9	1.0693	21967.9	1.2219	21967.9	1.02764	21967.9	1.16966
21930.8	1.14975	21930.8	1.45124	21930.8	0.538234	21930.8	1.2263	21930.8	1.50065	21930.8	1.24643	21930.8	1.32036	21930.8	1.38486	21930.8	1.26039	21930.8	1.0637	21930.8	1.2237	21930.8	1.02882	21930.8	1.17066
21893.3	1.14894	21893.3	1.45504	21893.3	0.522503	21893.3	1.2305	21893.3	1.50972	21893.3	1.24198	21893.3	1.3173	21893.3	1.37862	21893.3	1.26017	21893.3	1.0598	21893.3	1.2235	21893.3	1.025	21893.3	1.17336
21856	1.14183	21856	1.45284	21856	0.491472	21856	1.2282	21856	1.50299	21856	1.23873	21856	1.32515	21856	1.38459	21856	1.25996	21856	1.0504	21856	1.2299	21856	1.02898	21856	1.16965
21818.8	1.15322	21818.8	1.46264	21818.8	0.459141	21818.8	1.2225	21818.8	1.51356	21818.8	1.24898	21818.8	1.32518	21818.8	1.38339	21818.8	1.25976	21818.8	1.048	21818.8	1.228	21818.8	1.03066	21818.8	1.17675
21781.7	1.15551	21781.7	1.46254	21781.7	0.42621	21781.7	1.2162	21781.7	1.50193	21781.7	1.24652	21781.7	1.31452	21781.7	1.38223	21781.7	1.25956	21781.7	1.0404	21781.7	1.2301	21781.7	1.02884	21781.7	1.17635
21744.8	1.1512	21744.8	1.46074	21744.8	0.394179	21744.8	1.2064	21744.8	1.49899	21744.8	1.24306	21744.8	1.31726	21744.8	1.38267	21744.8	1.25937	21744.8	1.0304	21744.8	1.2277	21744.8	1.02922	21744.8	1.17885
21708	1.15268	21708	1.45634	21708	0.360948	21708	1.1908	21708	1.49615	21708	1.2436	21708	1.31889	21708	1.38762	21708	1.25917	21708	1.0215	21708	1.2347	21708	1.0299	21708	1.18524
21671.8	1.14286	21671.8	1.45674	21671.8	0.333897	21671.8	1.1825	21671.8	1.48851	21671.8	1.24193	21671.8	1.32082	21671.8	1.38391	21671.8	1.25897	21671.8	1.0086	21671.8	1.2296	21671.8	1.02828	21671.8	1.18684
21635.2	1.15224	21635.2	1.46064	21635.2	0.308766	21635.2	1.1672	21635.2	1.49617	21635.2	1.24176	21635.2	1.31765	21635.2	1.39488	21635.2	1.25873	21635.2	0.9997	21635.2	1.2282	21635.2	1.03186	21635.2	1.18143
21598.7	1.15082	21598.7	1.46594	21598.7	0.284035	21598.7	1.1506	21598.7	1.49112	21598.7	1.24029	21598.7	1.32227	21598.7	1.39572	21598.7	1.25845	21598.7	0.9874	21598.7	1.2289	21598.7	1.03245	21598.7	1.18773
21562.4	1.1476	21562.4	1.46395	21562.4	0.263204	21562.4	1.1329	21562.4	1.48868	21562.4	1.23421	21562.4	1.326	21562.4	1.39498	21562.4	1.25813	21562.4	0.9747	21562.4	1.2296	21562.4	1.03063	21562.4	1.18133
21526.2	1.14287	21526.2	1.46495	21526.2	0.243374	21526.2	1.1108	21526.2	1.47143	21526.2	1.22474	21526.2	1.31803	21526.2	1.39044	21526.2	1.25776	21526.2	0.9607	21526.2	1.2299	21526.2	1.03061	21526.2	1.18572
21490.6	1.12904	21490.6	1.46175	21490.6	0.225323	21490.6	1.0865	21490.6	1.45678	21490.6	1.21915	21490.6	1.31994	21490.6	1.393	21490.6	1.25734	21490.6	0.9455	21490.6	1.225	21490.6	1.03329	21490.6	1.18331
21454.6	1.12792	21454.6	1.45595	21454.6	0.210092	21454.6	1.0537	21454.6	1.44123	21454.6	1.21097	21454.6	1.31606	21454.6	1.39668	21454.6	1.25689	21454.6	0.9291	21454.6	1.2207	21454.6	1.03267	21454.6	1.19121
21418.8	1.11199	21418.8	1.46945	21418.8	0.195261	21418.8	1.0265	21418.8	1.42458	21418.8	1.20248	21418.8	1.31458	21418.8	1.39392	21418.8	1.25641	21418.8	0.9097	21418.8	1.2175	21418.8	1.03245	21418.8	1.1903
21383.1	1.10116	21383.1	1.46205	21383.1	0.18223	21383.1	0.9966	21383.1	1.41202	21383.1	1.19219	21383.1	1.3063	21383.1	1.40119	21383.1	1.25592	21383.1	0.8922	21383.1	1.2178	21383.1	1.03413	21383.1	1.1958
21347.9	1.07792	21347.9	1.46865	21347.9	0.167579	21347.9	0.9698	21347.9	1.37576	21347.9	1.17799	21347.9	1.30071	21347.9	1.39769	21347.9	1.25544	21347.9	0.8769	21347.9	1.2151	21347.9	1.03431	21347.9	1.19179
21312.4	1.04909	21312.4	1.46885	21312.4	0.153748	21312.4	0.9358	21312.4	1.3459	21312.4	1.1605	21312.4	1.28702	21312.4	1.39538	21312.4	1.25494	21312.4	0.8611	21312.4	1.2082	21312.4	1.03459	21312.4	1.19108
21277	1.01785	21277	1.46415	21277	0.141217	21277	0.9022	21277	1.29364	21277	1.1448	21277	1.26364	21277	1.39179	21277	1.25443	21277	0.8447	21277	1.2029	21277	1.02977	21277	1.19668
21241.8	0.97602	21241.8	1.47125	21241.8	0.129186	21241.8	0.8654	21241.8	1.23598	21241.8	1.12761	21241.8	1.23605	21241.8	1.38832	21241.8	1.25388	21241.8	0.8301	21241.8	1.1975	21241.8	1.02686	21241.8	1.20147
21207.1	0.93008	21207.1	1.46605	21207.1	0.117935	21207.1	0.8284	21207.1	1.17841	21207.1	1.1044	21207.1	1.21435	21207.1	1.37941	21207.1	1.25327	21207.1	0.8149	21207.1	1.1931	21207.1	1.02464	21207.1	1.20086
21172.1	0.88384	21172.1	1.47065	21172.1	0.107104	21172.1	0.7915	21172.1	1.11985	21172.1	1.08149	21172.1	1.17516	21172.1	1.3735	21172.1	1.25255	21172.1	0.802	21172.1	1.1837	21172.1	1.01842	21172.1	1.20355
21137.2	0.8386	21137.2	1.47425	21137.2	0.099673	21137.2	0.7588	21137.2	1.06138	21137.2	1.06719	21137.2	1.14276	21137.2	1.37402	21137.2	1.25174	21137.2	0.784	21137.2	1.167	21137.2	1.0121	21137.2	1.20024
21102.4	0.79845	21102.4	1.46235	21102.4	0.0918421	21102.4	0.7276	21102.4	1.00701	21102.4	1.03998	21102.4	1.10617	21102.4	1.36786	21102.4	1.25086	21102.4	0.7624	21102.4	1.1543	21102.4	1.00378	21102.4	1.18553
21068.2	0.7476	21068.2	1.46435	21068.2	0.084091	21068.2	0.6979	21068.2	0.946934	21068.2	1.02556	21068.2	1.05796	21068.2	1.35021	21068.2	1.24993	21068.2	0.7394	21068.2	1.133	21068.2	0.99246	21068.2	1.19812
21033.6	0.69636	21033.6	1.46665	21033.6	0.0769601	21033.6	0.6643	21033.6	0.881563	21033.6	1.00184	21033.6	1.01337	21033.6	1.32779	21033.6	1.24895	21033.6	0.7117	21033.6	1.1148	21033.6	0.975441	21033.6	1.19012
20999.1	0.65071	20999.1	1.46466	20999.1	0.0707292	20999.1	0.6329	20999.1	0.821989	20999.1	0.98143	20999.1	0.960965	20999.1	1.3051	20999.1	1.24794	20999.1	0.6883	20999.1	1.0989	20999.1	0.955722	20999.1	1.20251
20965.2	0.60616	20965.2	1.46116	20965.2	0.0646781	20965.2	0.6053	20965.2	0.763907	20965.2	0.9589	20965.2	0.912056	20965.2	1.28343	20965.2	1.24691	20965.2	0.6655	20965.2	1.0813	20965.2	0.934202	20965.2	1.20669
20931	0.56231	20931	1.45366	20931	0.0614472	20931	0.5774	20931	0.71183	20931	0.93868	20931	0.859353	20931	1.25259	20931	1.24584	20931	0.6431	20931	1.0528	20931	0.911284	20931	1.20628
20896.9	0.52236	20896.9	1.45996	20896.9	0.0591163	20896.9	0.5522	20896.9	0.658852	20896.9	0.91515	20896.9	0.810947	20896.9	1.2182	20896.9	1.24472	20896.9	0.6226	20896.9	1.0129	20896.9	0.883665	20896.9	1.20407
20863.3	0.4854	20863.3	1.45946	20863.3	0.0585652	20863.3	0.5267	20863.3	0.610165	20863.3	0.89672	20863.3	0.758734	20863.3	1.17702	20863.3	1.24353	20863.3	0.6049	20863.3	0.9637	20863.3	0.852445	20863.3	1.20296
20829.4	0.44825	20829.4	1.46296	20829.4	0.0603343	20829.4	0.5023	20829.4	0.563883	20829.4	0.87649	20829.4	0.713025	20829.4	1.13686	20829.4	1.24225	20829.4	0.5873	20829.4	0.9032	20829.4	0.825826	20829.4	1.19625
20795.6	0.41559	20795.6	1.46116	20795.6	0.0663034	20795.6	0.481	20795.6	0.5232	20795.6	0.85536	20795.6	0.666915	20795.6	1.09036	20795.6	1.24089	20795.6	0.5707	20795.6	0.843	20795.6	0.789507	20795.6	1.20084
20762.4	0.38693	20762.4	1.46066	20762.4	0.0739523	20762.4	0.4614	20762.4	0.485508	20762.4	0.83861	20762.4	0.623196	20762.4	1.04388	20762.4	1.23946	20762.4	0.5573	20762.4	0.7866	20762.4	0.759288	20762.4	1.19863
20728.8	0.35807	20728.8	1.46066	20728.8	0.0839214	20728.8	0.4406	20728.8	0.448221	20728.8	0.81948	20728.8	0.581183	20728.8	0.994453	20728.8	1.23795	20728.8	0.5414	20728.8	0.738	20728.8	0.726069	20728.8	1.19352
20695.4	0.33291	20695.4	1.45916	20695.4	0.0839905	20695.4	0.4208	20695.4	0.415132	20695.4	0.80214	20695.4	0.541168	20695.4	0.941641	20695.4	1.23637	20695.4	0.5282	20695.4	0.6955	20695.4	0.68945	20695.4	1.1961
20662.4	0.30935	20662.4	1.45706	20662.4	0.0771394	20662.4	0.4037	20662.4	0.384036	20662.4	0.78309	20662.4	0.502945	20662.4	0.890909	20662.4	1.23475	20662.4	0.5145	20662.4	0.6648	20662.4	0.65543	20662.4	1.20029
20629.2	0.28578	20629.2	1.45366	20629.2	0.0673085	20629.2	0.386	20629.2	0.354844	20629.2	0.76394	20629.2	0.467827	20629.2	0.838118	20629.2	1.23305	20629.2	0.5023	20629.2	0.6295	20629.2	0.620811	20629.2	1.20168
20596.5	0.26591	20596.5	1.45216	20596.5	0.0601575	20596.5	0.3684	20596.5	0.326744	20596.5	0.74839	20596.5	0.431801	20596.5	0.783166	20596.5	1.23132	20596.5	0.4887	20596.5	0.5967	20596.5	0.582892	20596.5	1.20166
20563.4	0.24745	20563.4	1.44916	20563.4	0.0525265	20563.4	0.3525	20563.4	0.300849	20563.4	0.73074	20563.4	0.40048	20563.4	0.732067	20563.4	1.2295	20563.4	0.4766	20563.4	0.5677	20563.4	0.551173	20563.4	1.20225
20530.5	0.22788	20530.5	1.43606	20530.5	0.0453956	20530.5	0.3381	20530.5	0.279052	20530.5	0.71449	20530.5	0.369257	20530.5	0.686045	20530.5	1.22765	20530.5	0.4649	20530.5	0.5399	20530.5	0.516454	20530.5	1.20554
20498.1	0.21211	20498.1	1.44016	20498.1	0.0391446	20498.1	0.3227	20498.1	0.257747	20498.1	0.70073	20498.1	0.341227	20498.1	0.638722	20498.1	1.22583	20498.1	0.4526	20498.1	0.5214	20498.1	0.483934	20498.1	1.21182
20465.4	0.19894	20465.4	1.43787	20465.4	0.0335136	20465.4	0.3104	20465.4	0.237947	20465.4	0.68387	20465.4	0.314401	20465.4	0.593299	20465.4	1.22401	20465.4	0.4424	20465.4	0.504	20465.4	0.452015	20465.4	1.21161
20433.2	0.18576	20433.2	1.42937	20433.2	0.0269626	20433.2	0.2994	20433.2	0.21924	20433.2	0.6702	20433.2	0.288768	20433.2	0.551305	20433.2	1.22224	20433.2	0.435	20433.2	0.4915	20433.2	0.424996	20433.2	1.21619
20400.7	0.17289	20400.7	1.43417	20400.7	0.0224317	20400.7	0.2885	20400.7	0.202437	20400.7	0.65474	20400.7	0.266839	20400.7	0.512979	20400.7	1.22047	20400.7	0.426	20400.7	0.4733	20400.7	0.400177	20400.7	1.21208
20368.3	0.16032	20368.3	1.42447	20368.3	0.0198007	20368.3	0.2785	20368.3	0.186832	20368.3	0.63988	20368.3	0.245109	20368.3	0.475663	20368.3	1.2187	20368.3	0.4181	20368.3	0.457	20368.3	0.373058	20368.3	1.21816
20336.4	0.15094	20336.4	1.42537	20336.4	0.0153497	20336.4	0.2678	20336.4	0.173119	20336.4	0.62921	20336.4	0.226771	20336.4	0.440845	20336.4	1.2169	20336.4	0.4111	20336.4	0.4378	20336.4	0.347438	20336.4	1.21955
20304.2	0.14116	20304.2	1.41727	20304.2	0.0129188	20304.2	0.2605	20304.2	0.161212	20304.2	0.61714	20304.2	0.208938	20304.2	0.409816	20304.2	1.215	20304.2	0.4036	20304.2	0.4209	20304.2	0.325819	20304.2	1.21963
20272.5	0.13318	20272.5	1.41547	20272.5	0.0118677	20272.5	0.253	20272.5	0.148996	20272.5	0.60306	20272.5	0.193997	20272.5	0.380782	20272.5	1.21303	20272.5	0.3974	20272.5	0.4015	20272.5	0.3034	20272.5	1.21592
20240.5	0.1252	20240.5	1.41127	20240.5	0.00983679	20240.5	0.2454	20240.5	0.137985	20240.5	0.59149	20240.5	0.177661	20240.5	0.352306	20240.5	1.21095	20240.5	0.3879	20240.5	0.3819	20240.5	0.282381	20240.5	1.2199
20209	0.11692	20209	1.40387	20209	0.00938575	20209	0.2396	20209	0.126567	20209	0.5797	20209	0.164618	20209	0.324899	20209	1.20881	20209	0.3768	20209	0.3649	20209	0.263561	20209	1.21708
20177.2	0.11024	20177.2	1.39447	20177.2	0.00905482	20177.2	0.2343	20177.2	0.117953	20177.2	0.57013	20177.2	0.151679	20177.2	0.300494	20177.2	1.20657	20177.2	0.367	20177.2	0.3478	20177.2	0.245242	20177.2	1.21747
20145.9	0.10375	20145.9	1.38787	20145.9	0.00860378	20145.9	0.2281	20145.9	0.108631	20145.9	0.55734	20145.9	0.138132	20145.9	0.277852	20145.9	1.20429	20145.9	0.3596	20145.9	0.3342	20145.9	0.228222	20145.9	1.21015
20114.2	0.09776	20114.2	1.37467	20114.2	0.0100728	20114.2	0.2213	20114.2	0.0998144	20114.2	0.54946	20114.2	0.127791	20114.2	0.25678	20114.2	1.2019	20114.2	0.3522	20114.2	0.3204	20114.2	0.212904	20114.2	1.21503
20083.1	0.09247	20083.1	1.37067	20083.1	0.0110218	20083.1	0.2162	20083.1	0.0927898	20083.1	0.53957	20083.1	0.117241	20083.1	0.237349	20083.1	1.19949	20083.1	0.3445	20083.1	0.3081	20083.1	0.201884	20083.1	1.21441
20051.7	0.08729	20051.7	1.36047	20051.7	0.0156909	20051.7	0.2101	20051.7	0.0857699	20051.7	0.52968	20051.7	0.108497	20051.7	0.218755	20051.7	1.19701	20051.7	0.3396	20051.7	0.2961	20051.7	0.189065	20051.7	1.2099
20020.8	0.08279	20020.8	1.35157	20020.8	0.0239398	20020.8	0.2068	20020.8	0.0813424	20020.8	0.52268	20020.8	0.0998446	20020.8	0.202687	20020.8	1.19453	20020.8	0.3308	20020.8	0.2854	20020.8	0.177245	20020.8	1.19198
19989.6	0.0781	19989.6	1.34287	19989.6	0.0320089	19989.6	0.2014	19989.6	0.0745195	19989.6	0.51189	19989.6	0.0920971	19989.6	0.187091	19989.6	1.19202	19989.6	0.3242	19989.6	0.2766	19989.6	0.165626	19989.6	1.21296
19958.9	0.07401	19958.9	1.33048	19958.9	0.0315579	19958.9	0.1979	19958.9	0.0693891	19958.9	0.50289	19958.9	0.0844423	19958.9	0.173098	19958.9	1.18955	19958.9	0.3187	19958.9	0.2684	19958.9	0.156507	19958.9	1.21564
19927.9	0.07032	19927.9	1.32228	19927.9	0.0231269	19927.9	0.1942	19927.9	0.0650633	19927.9	0.4948	19927.9	0.076992	19927.9	0.161311	19927.9	1.18709	19927.9	0.3117	19927.9	0.2615	19927.9	0.147888	19927.9	1.21852
19897.3	0.06612	19897.3	1.31538	19897.3	0.0143759	19897.3	0.1899	19897.3	0.0600299	19897.3	0.48819	19897.3	0.0719345	19897.3	0.149714	19897.3	1.18473	19897.3	0.3067	19897.3	0.2537	19897.3	0.140768	19897.3	1.2156
19866.5	0.06263	19866.5	1.30138	19866.5	0.00984496	19866.5	0.1865	19866.5	0.0576012	19866.5	0.4803	19866.5	0.0657814	19866.5	0.137519	19866.5	1.18243	19866.5	0.3001	19866.5	0.2471	19866.5	0.138849	19866.5	1.21588
19836.2	0.06003	19836.2	1.29298	19836.2	0.00719392	19836.2	0.184	19836.2	0.052365	19836.2	0.47499	19836.2	0.0602212	19836.2	0.12836	19836.2	1.18022	19836.2	0.2959	19836.2	0.2416	19836.2	0.138429	19836.2	1.21136
19805.9	0.05602	19805.9	1.27918	19805.9	0.00374287	19805.9	0.1812	19805.9	0.0481274	19805.9	0.46627	19805.9	0.0543596	19805.9	0.119672	19805.9	1.17806	19805.9	0.2923	19805.9	0.2367	19805.9	0.132809	19805.9	1.21544
19775.4	0.05403	19775.4	1.26928	19775.4	0.00171195	19775.4	0.1779	19775.4	0.0446943	19775.4	0.46077	19775.4	0.0507024	19775.4	0.111553	19775.4	1.17589	19775.4	0.2897	19775.4	0.2314	19775.4	0.120991	19775.4	1.21712
19745.3	0.05082	19745.3	1.25538	19745.3	-3.90978e-05	19745.3	0.175	19745.3	0.0419539	19745.3	0.45535	19745.3	0.0467382	19745.3	0.104095	19745.3	1.17373	19745.3	0.2878	19745.3	0.2289	19745.3	0.106471	19745.3	1.2165
19714.9	0.04892	19714.9	1.24698	19714.9	-0.000570025	19714.9	0.1713	19714.9	0.039918	19714.9	0.44854	19714.9	0.0423782	19714.9	0.0960184	19714.9	1.1715	19714.9	0.2866	19714.9	0.2257	19714.9	0.0984521	19714.9	1.20828
19685	0.04531	19685	1.23388	19685	-0.000921069	19685	0.17	19685	0.0376747	19685	0.44182	19685	0.0406114	19685	0.0895006	19685	1.16927	19685	0.2863	19685	0.2248	19685	0.0910323	19685	1.21146
19654.9	0.04341	19654.9	1.22188	19654.9	-0.000751997	19654.9	0.1681	19654.9	0.034836	19654.9	0.43681	19654.9	0.0363488	19654.9	0.0833586	19654.9	1.167	19654.9	0.2839	19654.9	0.2265	19654.9	0.0871135	19654.9	1.21644
19625.2	0.0414	19625.2	1.21068	19625.2	-0.00110304	19625.2	0.1669	19625.2	0.03289	19625.2	0.43139	19625.2	0.0338792	19625.2	0.0776391	19625.2	1.16479	19625.2	0.2808	19625.2	0.2299	19625.2	0.0821937	19625.2	1.20542
19595.5	0.03919	19595.5	1.19798	19595.5	-0.000654085	19595.5	0.1655	19595.5	0.0309426	19595.5	0.42476	19595.5	0.0308084	19595.5	0.0722324	19595.5	1.16265	19595.5	0.2762	19595.5	0.2372	19595.5	0.0813738	19595.5	1.2065
19565.6	0.03659	19565.6	1.18638	19565.6	-0.000885013	19565.6	0.1635	19565.6	0.0274997	19565.6	0.42134	19565.6	0.0283419	19565.6	0.067599	19565.6	1.16055	19565.6	0.2722	19565.6	0.2514	19565.6	0.083255	19565.6	1.20807
19536.2	0.03447	19536.2	1.17128	19536.2	-0.000936057	19536.2	0.1633	19536.2	0.0262495	19536.2	0.41541	19536.2	0.0250685	19536.2	0.0631447	19536.2	1.15854	19536.2	0.268	19536.2	0.2734	19536.2	0.0829352	19536.2	1.21895
19506.9	0.03386	19506.9	1.16198	19506.9	-0.0010871	19506.9	0.1643	19506.9	0.0247981	19506.9	0.40978	19506.9	0.0236938	19506.9	0.0589367	19506.9	1.15657	19506.9	0.267	19506.9	0.3065	19506.9	0.0795154	19506.9	1.20883
19477.2	0.03255	19477.2	1.14619	19477.2	-0.000918028	19477.2	0.1629	19477.2	0.023651	19477.2	0.40635	19477.2	0.0214233	19477.2	0.0557309	19477.2	1.1546	19477.2	0.2646	19477.2	0.3527	19477.2	0.0712966	19477.2	1.20461
19448.1	0.03153	19448.1	1.13749	19448.1	0.000130928	19448.1	0.1634	19448.1	0.0225968	19448.1	0.40251	19448.1	0.020246	19448.1	0.052712	19448.1	1.15268	19448.1	0.2626	19448.1	0.4182	19448.1	0.0627768	19448.1	1.19898
19418.6	0.03012	19418.6	1.12319	19418.6	0	19418.6	0.1632	19418.6	0.0207471	19418.6	0.39738	19418.6	0.018573	19418.6	0.050069	19418.6	1.15076	19418.6	0.2603	19418.6	0.4976	19418.6	0.055458	19418.6	1.18876
19389.6	0.0284	19389.6	1.11169	19389.6	-9.39949e-05	19389.6	0.1614	19389.6	0.0191902	19389.6	0.39314	19389.6	0.0161932	19389.6	0.0471469	19389.6	1.14889	19389.6	0.2582	19389.6	0.5988	19389.6	0.0487382	19389.6	1.17914
19360.7	0.02738	19360.7	1.09879	19360.7	-0.00088799	19360.7	0.1596	19360.7	0.018632	19360.7	0.3902	19360.7	0.0148121	19360.7	0.0451044	19360.7	1.14709	19360.7	0.2558	19360.7	0.718	19360.7	0.0447183	19360.7	1.16241
19331.5	0.02497	19331.5	1.08509	19331.5	-0.00117541	19331.5	0.1592	19331.5	0.0170782	19331.5	0.38797	19331.5	0.0127352	19331.5	0.042234	19331.5	1.14535	19331.5	0.2542	19331.5	0.8637	19331.5	0.0403996	19331.5	1.16829
19302.8	0.02425	19302.8	1.07119	19302.8	-0.00136941	19302.8	0.1604	19302.8	0.0154174	19302.8	0.38372	19302.8	0.0130517	19302.8	0.0397632	19302.8	1.14373	19302.8	0.2514	19302.8	1.03	19302.8	0.0374797	19302.8	1.14946
19274.1	0.02272	19274.1	1.05799	19274.1	-0.0012634	19274.1	0.16	19274.1	0.0148553	19274.1	0.38017	19274.1	0.0117669	19274.1	0.0380679	19274.1	1.14224	19274.1	0.2492	19274.1	1.1545	19274.1	0.0363599	19274.1	1.13324
19245.6	0.0228	19245.6	1.04639	19245.6	-0.0018574	19245.6	0.16	19245.6	0.0138918	19245.6	0.37702	19245.6	0.00968088	19245.6	0.035877	19245.6	1.14086	19245.6	0.2497	19245.6	1.2056	19245.6	0.0320401	19245.6	1.11862
19216.7	0.02078	19216.7	1.03469	19216.7	-0.00154482	19216.7	0.1618	19216.7	0.0136328	19216.7	0.37278	19216.7	0.00899898	19216.7	0.033865	19216.7	1.13954	19216.7	0.251	19216.7	1.2155	19216.7	0.0311213	19216.7	1.10749
19188.3	0.01975	19188.3	1.02249	19188.3	-0.00253882	19188.3	0.1635	19188.3	0.0123667	19188.3	0.36972	19188.3	0.0082105	19188.3	0.0316819	19188.3	1.1383	19188.3	0.2536	19188.3	1.2227	19188.3	0.0295015	19188.3	1.09167
19160	0.01943	19160	1.01119	19160	-0.00233281	19160	0.165	19160	0.0110994	19160	0.36667	19160	0.0077208	19160	0.0292383	19160	1.13708	19160	0.256	19160	1.2215	19160	0.0275817	19160	1.06614
19131.4	0.0177	19131.4	0.99759	19131.4	-0.00232023	19131.4	0.1656	19131.4	0.0107364	19131.4	0.36262	19131.4	0.0061352	19131.4	0.0285989	19131.4	1.13587	19131.4	0.2586	19131.4	1.2078	19131.4	0.0279629	19131.4	1.03762
19103.3	0.01667	19103.3	0.98649	19103.3	-0.00281423	19103.3	0.1629	19103.3	0.0105666	19103.3	0.36036	19103.3	0.00574308	19103.3	0.0278015	19103.3	1.13469	19103.3	0.2653	19103.3	1.1764	19103.3	0.026643	19103.3	1.01089
19075.2	0.01604	19075.2	0.97489	19075.2	-0.00310822	19075.2	0.1614	19075.2	0.00949543	19075.2	0.3576	19075.2	0.00594976	19075.2	0.027233	19075.2	1.13354	19075.2	0.2703	19075.2	1.1195	19075.2	0.0250232	19075.2	0.98586
19047.3	0.01431	19047.3	0.96349	19047.3	-0.00280222	19047.3	0.1608	19047.3	0.00912304	19047.3	0.35593	19047.3	0.00435524	19047.3	0.0260315	19047.3	1.13245	19047.3	0.2777	19047.3	1.0631	19047.3	0.0250034	19047.3	0.97184
19019	0.01438	19019	0.95169	19019	-0.00318964	19019	0.1625	19019	0.00915493	19019	0.35248	19019	0.00396478	19019	0.0243387	19019	1.1314	19019	0.2858	19019	1.0177	19019	0.0211846	19019	0.93211
18991.2	0.01365	18991.2	0.9389	18991.2	-0.00268364	18991.2	0.16	18991.2	0.00848003	18991.2	0.35011	18991.2	0.00346788	18991.2	0.0230002	18991.2	1.13045	18991.2	0.2948	18991.2	0.9785	18991.2	0.0198648	18991.2	0.89958
18963.5	0.01281	18963.5	0.9267	18963.5	-0.00337763	18963.5	0.1559	18963.5	0.00790388	18963.5	0.34924	18963.5	0.0010698	18963.5	0.0221243	18963.5	1.12957	18963.5	0.3056	18963.5	0.9427	18963.5	0.017345	18963.5	0.86706
18935.8	0.01178	18935.8	0.9171	18935.8	-0.00357163	18935.8	0.1509	18935.8	0.0069265	18935.8	0.34787	18935.8	0.00207055	18935.8	0.021479	18935.8	1.12872	18935.8	0.3163	18935.8	0.9067	18935.8	0.0166251	18935.8	0.84173
18907.9	0.01175	18907.9	0.9053	18907.9	-0.00275905	18907.9	0.1462	18907.9	0.00685335	18907.9	0.3452	18907.9	0.00297531	18907.9	0.0203782	18907.9	1.12787	18907.9	0.3276	18907.9	0.8687	18907.9	0.0173063	18907.9	0.8114
18880.4	0.01101	18880.4	0.8953	18880.4	-0.00235305	18880.4	0.1443	18880.4	0.0069735	18880.4	0.34403	18880.4	0.00137372	18880.4	0.018906	18880.4	1.12699	18880.4	0.3395	18880.4	0.8345	18880.4	0.0156865	18880.4	0.78798
18853	0.01097	18853	0.8848	18853	-0.00214704	18853	0.1453	18853	0.00619243	18853	0.34315	18853	0.00157097	18853	0.0190426	18853	1.12607	18853	0.349	18853	0.792	18853	0.0163667	18853	0.76335
18825.7	0.00983	18825.7	0.8737	18825.7	-0.00304104	18825.7	0.1485	18825.7	0.00601014	18825.7	0.34097	18825.7	0.00166707	18825.7	0.0176873	18825.7	1.12511	18825.7	0.3579	18825.7	0.7396	18825.7	0.0153469	18825.7	0.74232
18798.4	0.00909	18798.4	0.8629	18798.4	-0.00243503	18798.4	0.1604	18798.4	0.00542664	18798.4	0.33999	18798.4	0.00176202	18798.4	0.016123	18798.4	1.12411	18798.4	0.3648	18798.4	0.67	18798.4	0.013527	18798.4	0.72029
18770.9	0.00855	18770.9	0.8516	18770.9	-0.00174683	18770.9	0.1779	18770.9	0.00674733	18770.9	0.33772	18770.9	0.00146093	18770.9	0.0169066	18770.9	1.1231	18770.9	0.3693	18770.9	0.5913	18770.9	0.00950826	18770.9	0.69626
18743.8	0.00771	18743.8	0.8418	18743.8	-0.00268155	18743.8	0.1851	18743.8	0.00586141	18743.8	0.33754	18743.8	0.00175359	18743.8	0.01607	18743.8	1.12215	18743.8	0.3709	18743.8	0.511	18743.8	0.0101884	18743.8	0.67603
18716.8	0.00776	18716.8	0.8325	18716.8	-0.00211626	18716.8	0.1844	18716.8	0.0043743	18716.8	0.33515	18716.8	0.000645117	18716.8	0.0150518	18716.8	1.12124	18716.8	0.3677	18716.8	0.4415	18716.8	0.0102686	18716.8	0.65661
18689.8	0.00782	18689.8	0.8235	18689.8	-0.00275098	18689.8	0.1861	18689.8	0.004186	18689.8	0.33536	18689.8	0.00103552	18689.8	0.0144581	18689.8	1.1204	18689.8	0.3621	18689.8	0.3837	18689.8	0.00934879	18689.8	0.64108
18663	0.00747	18663	0.8133	18663	-0.0021857	18663	0.1891	18663	0.00399652	18663	0.33398	18663	0.000824793	18663	0.0142173	18663	1.11961	18663	0.3537	18663	0.3384	18663	0.00992896	18663	0.62355
18636.2	0.00662	18636.2	0.8051	18636.2	-0.00262042	18636.2	0.1967	18636.2	0.00420586	18636.2	0.33378	18636.2	-0.000187047	18636.2	0.0141892	18636.2	1.11888	18636.2	0.3473	18636.2	0.2992	18636.2	0.00610914	18636.2	0.60552
18609.5	0.00558	18609.5	0.7933	18609.5	-0.00295513	18609.5	0.1974	18609.5	0.00311403	18609.5	0.33399	18609.5	0	18609.5	0.0132897	18609.5	1.1182	18609.5	0.3422	18609.5	0.2666	18609.5	0.00768931	18609.5	0.59149
18582.5	0.00553	18582.5	0.7851	18582.5	-0.00268511	18582.5	0.1853	18582.5	0.00282631	18582.5	0.33171	18582.5	-2.45329e-05	18582.5	0.0127083	18582.5	1.1176	18582.5	0.3394	18582.5	0.2399	18582.5	0.00657053	18582.5	0.57746
18556	0.00558	18556	0.77481	18556	-0.00211982	18556	0.1695	18556	0.00193213	18556	0.33051	18556	-0.000453379	18556	0.0128004	18556	1.1171	18556	0.3399	18556	0.2159	18556	0.0059507	18556	0.56283
18529.5	0.00493	18529.5	0.76621	18529.5	-0.00195454	18529.5	0.1566	18529.5	0.0025368	18529.5	0.32851	18529.5	-8.29998e-05	18529.5	0.01145	18529.5	1.11671	18529.5	0.3425	18529.5	0.1964	18529.5	0.00583088	18529.5	0.551
18503.1	0.00498	18503.1	0.75861	18503.1	-0.00228926	18503.1	0.1465	18503.1	0.00144031	18503.1	0.32771	18503.1	-0.000613391	18503.1	0.0106665	18503.1	1.11642	18503.1	0.3474	18503.1	0.1792	18503.1	0.00491105	18503.1	0.53747
18476.8	0.00392	18476.8	0.74951	18476.8	-0.00142398	18476.8	0.1381	18476.8	0.00124267	18476.8	0.32681	18476.8	-0.000844549	18476.8	0.0114327	18476.8	1.11624	18476.8	0.3539	18476.8	0.1651	18476.8	0.00439122	18476.8	0.52264
18450.5	0.00387	18450.5	0.74131	18450.5	-0.00165869	18450.5	0.1343	18450.5	0.00134389	18450.5	0.32611	18450.5	-0.00157647	18450.5	0.0109674	18450.5	1.11613	18450.5	0.3652	18450.5	0.1522	18450.5	0.0045714	18450.5	0.5101
18424.3	0.00311	18424.3	0.73211	18424.3	-0.00129341	18424.3	0.1307	18424.3	0.00124397	18424.3	0.3246	18424.3	-0.00120915	18424.3	0.00960792	18424.3	1.11609	18424.3	0.3747	18424.3	0.1436	18424.3	0.00665157	18424.3	0.49967
18398.2	0.00326	18398.2	0.72291	18398.2	-0.00152813	18398.2	0.1295	18398.2	0.000942917	18398.2	0.3244	18398.2	-0.000342593	18398.2	0.00951134	18398.2	1.1161	18398.2	0.3899	18398.2	0.1354	18398.2	0.00533175	18398.2	0.49134
18372.2	0.0028	18372.2	0.71431	18372.2	-0.00286284	18372.2	0.1287	18372.2	0.00184074	18372.2	0.32349	18372.2	-0.000376787	18372.2	0.00903006	18372.2	1.11612	18372.2	0.4099	18372.2	0.1285	18372.2	0.00531192	18372.2	0.48301
18346.3	0.00294	18346.3	0.70781	18346.3	-0.00169756	18346.3	0.127	18346.3	-0.00016257	18346.3	0.32196	18346.3	-0.000911732	18346.3	0.00962517	18346.3	1.1161	18346.3	0.4331	18346.3	0.1235	18346.3	0.0054921	18346.3	0.47368
18320.1	0.00269	18320.1	0.69891	18320.1	-0.00252753	18320.1	0.1254	18320.1	0.00103814	18320.1	0.32196	18320.1	-0.002044	18320.1	0.00919207	18320.1	1.11601	18320.1	0.4608	18320.1	0.1185	18320.1	0.00487331	18320.1	0.46385
18294.2	0.00293	18294.2	0.69201	18294.2	-0.00166225	18294.2	0.1237	18294.2	0.00123258	18294.2	0.32005	18294.2	-0.00168044	18294.2	0.00762331	18294.2	1.11586	18294.2	0.4956	18294.2	0.1148	18294.2	0.00455349	18294.2	0.45242
18268.5	0.000964526	18268.5	0.68321	18268.5	-0.00179697	18268.5	0.1229	18268.5	0.00132592	18268.5	0.31884	18268.5	-0.00231763	18268.5	0.00726816	18268.5	1.11568	18268.5	0.5315	18268.5	0.1105	18268.5	0.00403366	18268.5	0.44128
18242.8	0.0015	18242.8	0.67411	18242.8	-0.00153169	18242.8	0.1224	18242.8	0.00121815	18242.8	0.31862	18242.8	-0.00185556	18242.8	0.00735452	18242.8	1.11549	18242.8	0.5722	18242.8	0.1083	18242.8	0.00571384	18242.8	0.43845
18217.3	0.00244	18217.3	0.66711	18217.3	-0.0015664	18217.3	0.1223	18217.3	0.00130928	18217.3	0.31771	18217.3	-0.00159422	18217.3	0.00625922	18217.3	1.11532	18217.3	0.6134	18217.3	0.1056	18217.3	0.00629401	18217.3	0.43172
18191.7	0.00218	18191.7	0.65991	18191.7	-0.00160112	18191.7	0.1221	18191.7	0.00109932	18191.7	0.3176	18191.7	-0.000933616	18191.7	0.00631833	18191.7	1.11519	18191.7	0.6527	18191.7	0.102	18191.7	0.00737419	18191.7	0.42149
18166.3	0.00161	18166.3	0.65131	18166.3	-0.00153584	18166.3	0.121	18166.3	0.000788262	18166.3	0.31639	18166.3	-0.00167374	18166.3	0.0059187	18166.3	1.11511	18166.3	0.6889	18166.3	0.1008	18166.3	0.00755436	18166.3	0.41305
18140.9	0.00164	18140.9	0.64312	18140.9	-0.00147055	18140.9	0.1208	18140.9	0.00067612	18140.9	0.31608	18140.9	-0.00171459	18140.9	0.0055299	18140.9	1.1151	18140.9	0.722	18140.9	0.0985	18140.9	0.00353454	18140.9	0.41212
18115.6	0.00178	18115.6	0.63812	18115.6	-0.000705272	18115.6	0.119	18115.6	0.000462896	18115.6	0.31586	18115.6	-0.00195616	18115.6	0.00562806	18115.6	1.11515	18115.6	0.7511	18115.6	0.0962	18115.6	0.000314711	18115.6	0.41039
18090.4	0.00161	18090.4	0.63252	18090.4	-0.00123999	18090.4	0.1192	18090.4	0.000448594	18090.4	0.31495	18090.4	-0.00229845	18090.4	0.00496116	18090.4	1.11526	18090.4	0.7727	18090.4	0.0937	18090.4	0.000594886	18090.4	0.40105
18065.2	0.000741093	18065.2	0.62282	18065.2	-0.000474707	18065.2	0.118	18065.2	0.00103322	18065.2	0.31373	18065.2	-0.00314146	18065.2	0.00463365	18065.2	1.11543	18065.2	0.7889	18065.2	0.0922	18065.2	0.00177506	18065.2	0.39352
18040.1	0.000371481	18040.1	0.61912	18040.1	-0.000609424	18040.1	0.1158	18040.1	-0.000283224	18040.1	0.31332	18040.1	-0.00228519	18040.1	0.00434783	18040.1	1.11564	18040.1	0.8012	18040.1	0.09	18040.1	0.000855235	18040.1	0.39098
18015.1	0.000400953	18015.1	0.61282	18015.1	-0.000244141	18015.1	0.1155	18015.1	0.000299269	18015.1	0.3127	18015.1	-0.00162962	18015.1	0.00413749	18015.1	1.11589	18015.1	0.8088	18015.1	0.0886	18015.1	-0.00056459	18015.1	0.38435
17990.1	0.000229511	17990.1	0.60672	17990.1	-0.000178858	17990.1	0.1143	17990.1	-0.000319299	17990.1	0.31209	17990.1	-0.00197476	17990.1	0.00338402	17990.1	1.11615	17990.1	0.8116	17990.1	0.0876	17990.1	-0.000784416	17990.1	0.37802
17965.3	-0.000242839	17965.3	0.59832	17965.3	0.000186425	17965.3	0.1145	17965.3	0.000361079	17965.3	0.31147	17965.3	-0.00122061	17965.3	0.00322166	17965.3	1.11641	17965.3	0.8083	17965.3	0.0857	17965.3	0.000795759	17965.3	0.37018
17940.4	-0.00102	17940.4	0.59332	17940.4	-0.000148293	17940.4	0.1132	17940.4	-0.000459594	17940.4	0.31165	17940.4	-0.00226716	17940.4	0.00391088	17940.4	1.11663	17940.4	0.803	17940.4	0.0847	17940.4	0.000675934	17940.4	0.36465
17915.7	-0.000290252	17915.7	0.58692	17915.7	-0.00088301	17915.7	0.1128	17915.7	-8.13143e-05	17915.7	0.31144	17915.7	-0.00291441	17915.7	0.00333136	17915.7	1.11676	17915.7	0.798	17915.7	0.0837	17915.7	0.000256108	17915.7	0.35881
17891	-0.000465306	17891	0.58122	17891	-0.00101773	17891	0.1122	17891	-0.000804076	17891	0.30992	17891	-0.00236235	17891	0.00332445	17891	1.11683	17891	0.7941	17891	0.0818	17891	0.00123628	17891	0.35318
17866.7	-0.000945458	17866.7	0.57652	17866.7	-0.000857188	17866.7	0.1121	17866.7	-0.00103276	17866.7	0.3102	17866.7	-0.00151425	17866.7	0.00234087	17866.7	1.11685	17866.7	0.7901	17866.7	0.0815	17866.7	0.00261542	17866.7	0.35094
17842.2	0.000277714	17842.2	0.57022	17842.2	-0.000791905	17842.2	0.1109	17842.2	-0.000357576	17842.2	0.30888	17842.2	-0.00156357	17842.2	0.00238531	17842.2	1.11684	17842.2	0.7866	17842.2	0.0796	17842.2	0.00139559	17842.2	0.3492
17817.7	0	17817.7	0.56482	17817.7	0.000373377	17817.7	0.1101	17817.7	-0.000683426	17817.7	0.30866	17817.7	-0.00271358	17817.7	0.00183811	17817.7	1.11683	17817.7	0.7846	17817.7	0.0799	17817.7	0.00367577	17817.7	0.34277
17793.3	-0.000278598	17793.3	0.55822	17793.3	-6.13399e-05	17793.3	0.11	17793.3	-0.0015103	17793.3	0.30844	17793.3	-0.00246428	17793.3	0.00182336	17793.3	1.11686	17793.3	0.7831	17793.3	0.078	17793.3	0.00355594	17793.3	0.34013
17768.9	0.000241925	17768.9	0.55362	17768.9	-0.000496057	17768.9	0.1098	17768.9	-0.000338197	17768.9	0.30852	17768.9	-0.00311565	17768.9	0.0013448	17768.9	1.11693	17768.9	0.7775	17768.9	0.0763	17768.9	0.00153612	17768.9	0.3397
17744.7	-0.000538428	17744.7	0.54613	17744.7	-0.000230774	17744.7	0.1093	17744.7	-0.00116711	17744.7	0.3074	17744.7	-0.00306771	17744.7	0.00187329	17744.7	1.11706	17744.7	0.7714	17744.7	0.0751	17744.7	-0.00038371	17744.7	0.33316
17720.4	-0.00102	17720.4	0.54203	17720.4	0.000134508	17720.4	0.1095	17720.4	-0.000697035	17720.4	0.30798	17720.4	-0.00262044	17720.4	0.00185918	17720.4	1.11724	17720.4	0.7657	17720.4	0.0733	17720.4	-0.00150354	17720.4	0.32712
17696.3	-0.000901747	17696.3	0.53673	17696.3	0.000599791	17696.3	0.1088	17696.3	-0.00112797	17696.3	0.30656	17696.3	-0.00157384	17696.3	0.00152264	17696.3	1.11744	17696.3	0.7575	17696.3	0.0723	17696.3	0.000876639	17696.3	0.31879
17672.2	-0.00118	17672.2	0.53023	17672.2	0.000465074	17672.2	0.1077	17672.2	-0.000859908	17672.2	0.30603	17672.2	-0.00172792	17672.2	0.00103946	17672.2	1.11763	17672.2	0.7455	17672.2	0.0698	17672.2	0.000156814	17672.2	0.31425
17648.2	-0.00107	17648.2	0.52653	17648.2	0.000430357	17648.2	0.1087	17648.2	0.000107153	17648.2	0.30641	17648.2	-0.00148266	17648.2	0.000389877	17648.2	1.11779	17648.2	0.7263	17648.2	0.0678	17648.2	0.00293699	17648.2	0.31121
17624.6	-0.000957295	17624.6	0.52003	17624.6	0.000590896	17624.6	0.1074	17624.6	-0.00063153	17624.6	0.30478	17624.6	-0.000441247	17624.6	0.000881292	17624.6	1.11793	17624.6	0.6969	17624.6	0.0675	17624.6	0.00391612	17624.6	0.31068
17600.7	-0.00154	17600.7	0.51443	17600.7	0.000753941	17600.7	0.1071	17600.7	-0.00116644	17600.7	0.30536	17600.7	-0.000297312	17600.7	0.00051069	17600.7	1.11805	17600.7	0.6558	17600.7	0.0668	17600.7	0.0018963	17600.7	0.30884
17576.9	-0.00123	17576.9	0.51073	17576.9	0.000977766	17576.9	0.1065	17576.9	-0.00150235	17576.9	0.30434	17576.9	-0.000954037	17576.9	0.000818775	17576.9	1.11817	17576.9	0.6008	17576.9	0.0647	17576.9	0.00497647	17576.9	0.3057
17553.1	-0.00132	17553.1	0.50613	17553.1	0.000501591	17553.1	0.1065	17553.1	-0.00163923	17553.1	0.30411	17553.1	-0.00161142	17553.1	0.000672416	17553.1	1.11829	17553.1	0.5424	17553.1	0.063	17553.1	0.00445665	17553.1	0.30156
17529.4	-0.0011	17529.4	0.50183	17529.4	0.000825416	17529.4	0.1061	17529.4	-0.0015771	17529.4	0.30319	17529.4	-0.000569458	17529.4	0.000820621	17529.4	1.11838	17529.4	0.4846	17529.4	0.0621	17529.4	0.00303682	17529.4	0.29683
17505.8	-0.00139	17505.8	0.49613	17505.8	0.00034924	17505.8	0.1062	17505.8	-0.00221594	17505.8	0.30386	17505.8	-0.00232815	17505.8	0.00118267	17505.8	1.1184	17505.8	0.4367	17505.8	0.0611	17505.8	0.002717	17505.8	0.29069
17482.5	-0.000687154	17482.5	0.49093	17482.5	0.000171457	17482.5	0.1063	17482.5	-0.000460432	17482.5	0.30403	17482.5	-9.06091e-05	17482.5	-0.000228773	17482.5	1.11835	17482.5	0.3942	17482.5	0.0593	17482.5	0.00389613	17482.5	0.28675
17459	-0.00108	17459	0.48653	17459	0.000295281	17459	0.106	17459	-0.0017012	17459	0.30361	17459	-0.000850588	17459	-0.000442276	17459	1.11824	17459	0.3606	17459	0.0577	17459	0.0013763	17459	0.28221
17435.6	-0.00117	17435.6	0.48093	17435.6	-8.08939e-05	17435.6	0.1057	17435.6	-0.00194294	17435.6	0.30298	17435.6	0.00038879	17435.6	-0.00095175	17435.6	1.1181	17435.6	0.3313	17435.6	0.0556	17435.6	0.000856478	17435.6	0.27967
17412.2	-0.000861347	17412.2	0.47613	17412.2	-0.000457069	17412.2	0.1059	17412.2	-0.00178564	17412.2	0.30305	17412.2	-0.000172475	17412.2	-0.000840815	17412.2	1.11798	17412.2	0.3042	17412.2	0.0539	17412.2	0.00183665	17412.2	0.27673
17388.9	-0.00195	17388.9	0.47183	17388.9	-3.32446e-05	17388.9	0.1068	17388.9	-0.00122929	17388.9	0.30302	17388.9	-0.000734379	17388.9	8.31605e-05	17388.9	1.11791	17388.9	0.2815	17388.9	0.0534	17388.9	-0.000783173	17388.9	0.2767
17365.9	-0.000852239	17365.9	0.46924	17365.9	-0.000111028	17365.9	0.1072	17365.9	-0.00187851	17365.9	0.30279	17365.9	0	17365.9	-0.000351015	17365.9	1.11792	17365.9	0.2601	17365.9	0.0508	17365.9	-0.000604039	17365.9	0.27096
17342.7	5.3083e-05	17342.7	0.46404	17342.7	-0.000587203	17342.7	0.1075	17342.7	-0.00172405	17342.7	0.30336	17342.7	-0.000837261	17342.7	-0.000857211	17342.7	1.11801	17342.7	0.2415	17342.7	0.0501	17342.7	0.00107614	17342.7	0.26642
17319.6	-0.00084241	17319.6	0.46044	17319.6	3.66213e-05	17319.6	0.1084	17319.6	-0.000270538	17319.6	0.30303	17319.6	-0.000474957	17319.6	-0.000754675	17319.6	1.11817	17319.6	0.2232	17319.6	0.0489	17319.6	0.00275631	17319.6	0.26208
17296.5	-0.000638713	17296.5	0.45734	17296.5	0.000360446	17296.5	0.1098	17296.5	-0.000317969	17296.5	0.3033	17296.5	-0.000313084	17296.5	-0.00113796	17296.5	1.11833	17296.5	0.2067	17296.5	0.0481	17296.5	0.00313648	17296.5	0.26114
17273.8	-0.000739753	17273.8	0.45254	17273.8	0.00118266	17273.8	0.1113	17273.8	-0.000170898	17273.8	0.30357	17273.8	-0.000953737	17273.8	-0.00109394	17273.8	1.11847	17273.8	0.1914	17273.8	0.046	17273.8	0.00501562	17273.8	0.2557
17250.9	-0.000637659	17250.9	0.44794	17250.9	0.00130649	17250.9	0.1142	17250.9	7.98114e-05	17250.9	0.30224	17250.9	-0.000492718	17250.9	-0.00233942	17250.9	1.11854	17250.9	0.1782	17250.9	0.0459	17250.9	0.00549579	17250.9	0.25196
17228	-0.00104	17228	0.44244	17228	-0.000169688	17228	0.1165	17228	0.00122959	17228	0.29851	17228	-0.000832127	17228	-0.00206994	17228	1.11853	17228	0.1666	17228	0.0441	17228	0.00367597	17228	0.25182
17205.2	-0.000735872	17205.2	0.43714	17205.2	0.000554137	17205.2	0.1203	17205.2	0.000178443	17205.2	0.29438	17205.2	-7.19615e-05	17205.2	-0.000881751	17205.2	1.11843	17205.2	0.156	17205.2	0.0432	17205.2	-4.38579e-05	17205.2	0.24878
17182.7	-0.000440059	17182.7	0.43424	17182.7	-0.000123647	17182.7	0.1276	17182.7	-0.000578141	17182.7	0.29434	17182.7	0.000285708	17182.7	-0.000827841	17182.7	1.11825	17182.7	0.1472	17182.7	0.0423	17182.7	-0.000664724	17182.7	0.24754
17160	-0.000641142	17160	0.42964	17160	1.77826e-07	17160	0.1402	17160	0.000268881	17160	0.29511	17160	-0.000654966	17160	-0.000581055	17160	1.118	17160	0.1407	17160	0.0422	17160	0.00139092	17160	0.2432
17137.4	-0.000743013	17137.4	0.42564	17137.4	0.001224	17137.4	0.1718	17137.4	0.000214987	17137.4	0.29528	17137.4	-0.000196062	17137.4	-0.00141593	17137.4	1.11771	17137.4	0.1353	17137.4	0.0412	17137.4	-0.000253553	17137.4	0.23846
17114.8	-0.00014567	17114.8	0.42104	17114.8	-5.21728e-05	17114.8	0.2259	17114.8	6.01804e-05	17114.8	0.29514	17114.8	-0.000537576	17114.8	-0.00110729	17114.8	1.11742	17114.8	0.1319	17114.8	0.0404	17114.8	0.000101971	17114.8	0.23662
17092.6	-5.29564e-05	17092.6	0.41874	17092.6	0.000770044	17092.6	0.2576	17092.6	0	17092.6	0.29571	17092.6	-0.000281557	17092.6	-0.000945589	17092.6	1.11714	17092.6	0.1297	17092.6	0.0399	17092.6	0.000956775	17092.6	0.23527
17070.1	-0.000357166	17070.1	0.41444	17070.1	9.38684e-05	17070.1	0.2459	17070.1	0.000554199	17070.1	0.29467	17070.1	0.000276101	17070.1	-0.000949122	17070.1	1.11686	17070.1	0.1298	17070.1	0.0395	17070.1	0.0011123	17070.1	0.23503
17047.7	-0.000762151	17047.7	0.40924	17047.7	0.000617693	17047.7	0.2407	17047.7	-0.00019227	17047.7	0.29484	17047.7	-0.000566654	17047.7	-0.000722698	17047.7	1.11662	17047.7	0.1313	17047.7	0.0385	17047.7	0.00336782	17047.7	0.23469
17025.6	-0.000471727	17025.6	0.40654	17025.6	0.00083991	17025.6	0.2456	17025.6	0.000557316	17025.6	0.2951	17025.6	-0.000511856	17025.6	-0.000118828	17025.6	1.11645	17025.6	0.1354	17025.6	0.0379	17025.6	0.00552263	17025.6	0.23235
17003.3	2.17533e-05	17003.3	0.40175	17003.3	6.37343e-05	17003.3	0.2373	17003.3	-9.04707e-05	17003.3	0.29377	17003.3	-0.000655429	17003.3	-0.00161486	17003.3	1.11637	17003.3	0.1404	17003.3	0.0375	17003.3	0.00457815	17003.3	0.22931
16981.1	-0.000285534	16981.1	0.39695	16981.1	-0.000512441	16981.1	0.2301	16981.1	0.000261083	16981.1	0.29473	16981.1	0.000100589	16981.1	-0.00148103	16981.1	1.11639	16981.1	0.1486	16981.1	0.0375	16981.1	0.00483368	16981.1	0.22677
16959.2	-0.000497372	16959.2	0.39405	16959.2	-0.000290224	16959.2	0.2377	16959.2	0.000108725	16959.2	0.29429	16959.2	-4.58186e-05	16959.2	-0.0014608	16959.2	1.11651	16959.2	0.1577	16959.2	0.0371	16959.2	0.00498848	16959.2	0.22382
16937.1	0.000493825	16937.1	0.39125	16937.1	-0.0005664	16937.1	0.252	16937.1	-0.000641025	16937.1	0.29295	16937.1	0.000509391	16937.1	-0.000470487	16937.1	1.11671	16937.1	0.1701	16937.1	0.0355	16937.1	0.00574401	16937.1	0.21798
16915	-0.000515737	16915	0.38545	16915	-0.00134258	16915	0.2721	16915	0.000508574	16915	0.29302	16915	-0.000835803	16915	-0.000890511	16915	1.11694	16915	0.1856	16915	0.0351	16915	0.00939953	16915	0.21364
16893.3	-0.000629812	16893.3	0.38075	16893.3	-0.000420359	16893.3	0.3146	16893.3	-4.5706e-05	16893.3	0.29318	16893.3	-0.000483403	16893.3	-0.00113034	16893.3	1.11716	16893.3	0.2019	16893.3	0.036	16893.3	0.0108543	16893.3	0.2115
16871.4	0.000859128	16871.4	0.37525	16871.4	-0.000296534	16871.4	0.4	16871.4	-9.73953e-05	16871.4	0.29364	16871.4	7.0604e-05	16871.4	-0.00109006	16871.4	1.11736	16871.4	0.2204	16871.4	0.0346	16871.4	0.0100099	16871.4	0.20906
16849.8	4.35797e-05	16849.8	0.37245	16849.8	-0.000374317	16849.8	0.4795	16849.8	0.000447059	16849.8	0.2928	16849.8	0.000122219	16849.8	-0.00154859	16849.8	1.11752	16849.8	0.2411	16849.8	0.0353	16849.8	0.0167647	16849.8	0.20781
16827.9	0.000231033	16827.9	0.37025	16827.9	0.000649507	16827.9	0.4536	16827.9	0.000494092	16827.9	0.29286	16827.9	0.000275433	16827.9	-0.000556002	16827.9	1.11763	16827.9	0.261	16827.9	0.0356	16827.9	0.0216202	16827.9	0.21197
16806.2	0.000317741	16806.2	0.36605	16806.2	0.000973332	16806.2	0.3968	16806.2	-5.95145e-05	16806.2	0.29222	16806.2	0.000628251	16806.2	-0.00033756	16806.2	1.11768	16806.2	0.2828	16806.2	0.0358	16806.2	0.0274757	16806.2	0.21243
16784.7	0	16784.7	0.36215	16784.7	0.000995549	16784.7	0.3863	16784.7	-0.000516945	16784.7	0.29218	16784.7	-0.000321303	16784.7	-0.000362782	16784.7	1.11766	16784.7	0.3035	16784.7	0.0336	16784.7	0.0312305	16784.7	0.21128
16763.1	-0.000387131	16763.1	0.35815	16763.1	0.00211937	16763.1	0.3737	16763.1	-0.000671815	16763.1	0.29074	16763.1	-0.000369269	16763.1	-0.00105889	16763.1	1.11757	16763.1	0.327	16763.1	0.0321	16763.1	0.038386	16763.1	0.20994
16741.7	-0.000177565	16741.7	0.35475	16741.7	0.00244159	16741.7	0.3513	16741.7	-0.00133049	16741.7	0.2909	16741.7	-1.9593e-05	16741.7	-0.00139351	16741.7	1.11742	16741.7	0.3534	16741.7	0.0319	16741.7	0.0435408	16741.7	0.2081
16720.2	3.42152e-05	16720.2	0.35225	16720.2	0.00286541	16720.2	0.3712	16720.2	-0.00118661	16720.2	0.29025	16720.2	-0.000868336	16720.2	-0.000723015	16720.2	1.11719	16720.2	0.3824	16720.2	0.0308	16720.2	0.0465964	16720.2	0.20595
16699	-0.000457289	16699	0.34905	16699	0.00458763	16699	0.4403	16699	-0.00124652	16699	0.29071	16699	-0.000419425	16699	-0.000260044	16699	1.11691	16699	0.4139	16699	0.0304	16699	0.0471512	16699	0.20341
16677.5	-0.000846589	16677.5	0.34575	16677.5	0.00641146	16677.5	0.4784	16677.5	-0.00120388	16677.5	0.28977	16677.5	-0.000268939	16677.5	-0.000676663	16677.5	1.11658	16677.5	0.4456	16677.5	0.0309	16677.5	0.0475067	16677.5	0.20647
16656.1	-0.000536429	16656.1	0.34395	16656.1	0.00773528	16656.1	0.4361	16656.1	-0.000661871	16656.1	0.28843	16656.1	-0.000218839	16656.1	-0.00113696	16656.1	1.11625	16656.1	0.4774	16656.1	0.0309	16656.1	0.0510622	16656.1	0.21092
16635.1	-0.000829526	16635.1	0.33856	16635.1	0.0108575	16635.1	0.3768	16635.1	-0.000423611	16635.1	0.28868	16635.1	-0.000871066	16635.1	-0.00184333	16635.1	1.11593	16635.1	0.5079	16635.1	0.0296	16635.1	0.055817	16635.1	0.21178
16613.8	-0.000220434	16613.8	0.33506	16613.8	0.0144813	16613.8	0.3306	16613.8	-0.00028283	16613.8	0.28904	16613.8	-0.000821729	16613.8	-0.000971075	16613.8	1.11565	16613.8	0.5363	16613.8	0.0294	16613.8	0.0578725	16613.8	0.20623
16592.8	-0.000514582	16592.8	0.33116	16592.8	0.0151035	16592.8	0.2767	16592.8	-0.00144578	16592.8	0.28719	16592.8	-0.000874706	16592.8	-0.00110518	16592.8	1.11541	16592.8	0.5585	16592.8	0.0295	16592.8	0.0499274	16592.8	0.20629
16571.7	-0.000306549	16571.7	0.32836	16571.7	0.0167274	16571.7	0.2272	16571.7	-0.000906217	16571.7	0.28705	16571.7	-0.00112613	16571.7	-0.00210665	16571.7	1.11518	16571.7	0.5752	16571.7	0.0292	16571.7	0.0418829	16571.7	0.20334
16550.8	-0.000801739	16550.8	0.32516	16550.8	0.0177496	16550.8	0.2032	16550.8	-0.000970366	16550.8	0.2869	16550.8	-7.98462e-05	16550.8	-0.00138651	16550.8	1.11498	16550.8	0.5848	16550.8	0.0292	16550.8	0.0372377	16550.8	0.2081
16529.7	-9.47577e-05	16529.7	0.32206	16529.7	0.0179734	16529.7	0.1983	16529.7	-0.000932016	16529.7	0.28696	16529.7	6.7983e-05	16529.7	-0.00094627	16529.7	1.11478	16529.7	0.5883	16529.7	0.0283	16529.7	0.0325932	16529.7	0.21315
16509	-0.000190981	16509	0.31786	16509	0.0149956	16509	0.2029	16509	-0.000797355	16509	0.28661	16509	1.35238e-05	16509	-0.000225502	16509	1.11459	16509	0.5887	16509	0.0268	16509	0.027848	16509	0.21731
16488	-8.50438e-05	16488	0.31576	16488	0.0125194	16488	0.1998	16488	-0.00216021	16488	0.28527	16488	0.000260608	16488	-0.000862087	16488	1.11438	16488	0.5872	16488	0.0264	16488	0.0254035	16488	0.22246
16467.4	0.000317707	16467.4	0.31206	16467.4	0.00984166	16467.4	0.1812	16467.4	-0.00142673	16467.4	0.28562	16467.4	-0.000694585	16467.4	-0.00118684	16467.4	1.11417	16467.4	0.5847	16467.4	0.0266	16467.4	0.0252583	16467.4	0.22902
16446.6	0.000122608	16446.6	0.30896	16446.6	0.00826549	16446.6	0.1565	16446.6	-0.00199077	16446.6	0.28427	16446.6	-0.00014824	16446.6	-0.00111871	16446.6	1.11394	16446.6	0.5819	16446.6	0.0265	16446.6	0.0267139	16446.6	0.23307
16426	0.00032434	16426	0.30536	16426	0.0079877	16426	0.1381	16426	-0.00165847	16426	0.28332	16426	-0.00030416	16426	-0.00151586	16426	1.11372	16426	0.5813	16426	0.027	16426	0.0261687	16426	0.23463
16405.3	0.000428214	16405.3	0.30276	16405.3	0.00581153	16405.3	0.1269	16405.3	-0.00172369	16405.3	0.28338	16405.3	-0.00045855	16405.3	-0.000597184	16405.3	1.11353	16405.3	0.5793	16405.3	0.0266	16405.3	0.0288242	16405.3	0.23668
16384.8	0.000528935	16384.8	0.29876	16384.8	0.00413374	16384.8	0.1187	16384.8	-0.00129255	16384.8	0.28353	16384.8	0.000684808	16384.8	-0.00146997	16384.8	1.11338	16384.8	0.5744	16384.8	0.026	16384.8	0.030079	16384.8	0.23943
16364.5	-0.000170843	16364.5	0.29646	16364.5	0.00375596	16364.5	0.114	16364.5	-0.00176198	16364.5	0.28318	16364.5	2.78103e-05	16364.5	-0.00101866	16364.5	1.11325	16364.5	0.5636	16364.5	0.026	16364.5	0.0327338	16364.5	0.24089
16343.9	-0.000368494	16343.9	0.29426	16343.9	0.00217979	16343.9	0.1119	16343.9	-0.00212897	16343.9	0.28253	16343.9	0.000872332	16343.9	-0.0012419	16343.9	1.11313	16343.9	0.5498	16343.9	0.0255	16343.9	0.0394893	16343.9	0.24444
16323.6	-0.000269271	16323.6	0.29156	16323.6	0.002702	16323.6	0.1117	16323.6	-0.00219955	16323.6	0.28258	16323.6	-0.00018538	16323.6	-0.000296769	16323.6	1.11301	16323.6	0.5299	16323.6	0.0255	16323.6	0.0485441	16323.6	0.2429
16303.1	-0.000267931	16303.1	0.28837	16303.1	0.00262583	16303.1	0.1108	16303.1	-0.0015677	16303.1	0.28143	16303.1	-0.00054158	16303.1	-0.00119466	16303.1	1.11285	16303.1	0.5094	16303.1	0.026	16303.1	0.0540997	16303.1	0.24125
16282.9	-0.0006697	16282.9	0.28587	16282.9	0.00184804	16282.9	0.1062	16282.9	-0.00223942	16282.9	0.28058	16282.9	0	16282.9	-0.000868805	16282.9	1.11267	16282.9	0.4917	16282.9	0.0262	16282.9	0.0577545	16282.9	0.2377
16262.5	-0.000869361	16262.5	0.28517	16262.5	0.000971868	16262.5	0.1019	16262.5	-0.00140872	16262.5	0.28083	16262.5	-8.35944e-05	16262.5	-0.00117324	16262.5	1.11246	16262.5	0.475	16262.5	0.0264	16262.5	0.05951	16262.5	0.24036
16242.5	-0.000572115	16242.5	0.28277	16242.5	0.000694085	16242.5	0.0995	16242.5	-0.000581581	16242.5	0.28018	16242.5	-0.00057053	16242.5	-0.000846012	16242.5	1.11221	16242.5	0.4594	16242.5	0.0258	16242.5	0.0624648	16242.5	0.24201
16222.4	-0.000875355	16222.4	0.27907	16222.4	0.000516301	16222.4	0.0983	16222.4	-0.000955002	16222.4	0.27923	16222.4	-0.00135799	16222.4	-0.00116324	16222.4	1.11192	16222.4	0.4447	16222.4	0.0261	16222.4	0.0633196	16222.4	0.25256
16202.2	-0.000676501	16202.2	0.27537	16202.2	0.00134013	16202.2	0.0964	16202.2	-0.000326009	16202.2	0.27957	16202.2	-0.00104319	16202.2	-0.00189238	16202.2	1.11157	16202.2	0.4326	16202.2	0.0252	16202.2	0.0644751	16202.2	0.26621
16182.3	-0.000480715	16182.3	0.27267	16182.3	0.000962342	16182.3	0.0954	16182.3	-0.000800551	16182.3	0.27872	16182.3	-0.000931702	16182.3	-0.00124554	16182.3	1.11115	16182.3	0.4201	16182.3	0.0249	16182.3	0.0644299	16182.3	0.27807
16162.1	-8.28437e-05	16162.1	0.27027	16162.1	0.000786167	16162.1	0.0948	16162.1	-0.00117269	16162.1	0.27737	16162.1	-0.00121796	16162.1	-0.000298184	16162.1	1.11067	16162.1	0.4079	16162.1	0.0255	16162.1	0.0604854	16162.1	0.28392
16142.3	-0.000788024	16142.3	0.27007	16142.3	0.000708384	16142.3	0.094	16142.3	-0.00124834	16142.3	0.27662	16142.3	0.000292481	16142.3	-0.000305921	16142.3	1.11016	16142.3	0.3952	16142.3	0.0248	16142.3	0.0535402	16142.3	0.27457
16122.5	-0.000393682	16122.5	0.26597	16122.5	3.06002e-05	16122.5	0.0933	16122.5	-0.00142455	16122.5	0.27716	16122.5	0.000602408	16122.5	-0.000495814	16122.5	1.10965	16122.5	0.3785	16122.5	0.0255	16122.5	0.045395	16122.5	0.26252
16102.5	-0.000597269	16102.5	0.26177	16102.5	0.00115442	16102.5	0.0927	16102.5	-0.00189837	16102.5	0.27711	16102.5	-0.000285426	16102.5	2.7154e-05	16102.5	1.10915	16102.5	0.3586	16102.5	0.0248	16102.5	0.0350506	16102.5	0.25048
16082.9	-0.000503882	16082.9	0.25837	16082.9	0.000976641	16082.9	0.0926	16082.9	-0.000775672	16082.9	0.27665	16082.9	0.000723469	16082.9	-8.84893e-05	16082.9	1.10868	16082.9	0.3372	16082.9	0.0253	16082.9	0.0231054	16082.9	0.23983
16063.2	-1.09685e-05	16063.2	0.25497	16063.2	0.000398858	16063.2	0.0919	16063.2	-0.00105352	16063.2	0.2769	16063.2	0.000731853	16063.2	0.000488006	16063.2	1.10824	16063.2	0.3156	16063.2	0.0246	16063.2	0.0173602	16063.2	0.23018
16043.4	-0.000815996	16043.4	0.25297	16043.4	0.00112268	16043.4	0.0917	16043.4	-0.001129	16043.4	0.27645	16043.4	-0.000257538	16043.4	-0.000209869	16043.4	1.10781	16043.4	0.2949	16043.4	0.0246	16043.4	0.0149157	16043.4	0.22063
16023.8	0.000275973	16023.8	0.25117	16023.8	-0.000655101	16023.8	0.0922	16023.8	-0.00110794	16023.8	0.27459	16023.8	0.000849826	16023.8	-0.00075816	16023.8	1.10741	16023.8	0.2764	16023.8	0.025	16023.8	0.0165705	16023.8	0.21488
16004.4	-0.000132526	16004.4	0.24907	16004.4	-0.000432884	16004.4	0.0919	16004.4	-0.000387411	16004.4	0.27503	16004.4	0.000756685	16004.4	-0.00063245	16004.4	1.10705	16004.4	0.2604	16004.4	0.0242	16004.4	0.0144253	16004.4	0.21093
15984.7	6.1021e-05	15984.7	0.24798	15984.7	-0.00080906	15984.7	0.0912	15984.7	-0.000164531	15984.7	0.27418	15984.7	0.000265754	15984.7	-0.000549186	15984.7	1.10673	15984.7	0.2459	15984.7	0.0243	15984.7	0.00858084	15984.7	0.20779
15965.3	0.000351588	15965.3	0.24608	15965.3	1.31571e-05	15965.3	0.091	15965.3	-0.000445082	15965.3	0.27292	15965.3	7.16029e-05	15965.3	-0.000923633	15965.3	1.10647	15965.3	0.2353	15965.3	0.0234	15965.3	0.00543564	15965.3	0.20524
15945.9	0.000441692	15945.9	0.24358	15945.9	-0.000864626	15945.9	0.0915	15945.9	-2.61659e-05	15945.9	0.27356	15945.9	7.69533e-05	15945.9	-0.00130678	15945.9	1.10623	15945.9	0.2256	15945.9	0.0232	15945.9	0.00529044	15945.9	0.20379
15926.6	-6.86632e-05	15926.6	0.24208	15926.6	-0.00104241	15926.6	0.0912	15926.6	-7.77937e-06	15926.6	0.27181	15926.6	-0.000518193	15926.6	-0.00162641	15926.6	1.10598	15926.6	0.2177	15926.6	0.0228	15926.6	0.00434525	15926.6	0.20354
15907.1	-7.69909e-05	15907.1	0.24038	15907.1	-0.000918585	15907.1	0.092	15907.1	-0.000387058	15907.1	0.27225	15907.1	-0.00051115	15907.1	-0.00167472	15907.1	1.10571	15907.1	0.2129	15907.1	0.0228	15907.1	0.00470077	15907.1	0.20659
15887.9	-0.000388268	15887.9	0.23868	15887.9	-0.000396369	15887.9	0.091	15887.9	-0.000169732	15887.9	0.27289	15887.9	-0.000507292	15887.9	-0.000216386	15887.9	1.10543	15887.9	0.2086	15887.9	0.0222	15887.9	0.00315557	15887.9	0.20434
15868.7	0	15868.7	0.23638	15868.7	-0.000674152	15868.7	0.0914	15868.7	4.70687e-05	15868.7	0.27313	15868.7	0.000296074	15868.7	-0.000329724	15868.7	1.10515	15868.7	0.2072	15868.7	0.022	15868.7	0.00251038	15868.7	0.20049
15849.6	-0.000294817	15849.6	0.23538	15849.6	-0.000451935	15849.6	0.0912	15849.6	0.000463348	15849.6	0.27307	15849.6	0.000298951	15849.6	-0.000235764	15849.6	1.10488	15849.6	0.2071	15849.6	0.0231	15849.6	0.00186518	15849.6	0.19834
15830.3	0.000111493	15830.3	0.23328	15830.3	-0.000928111	15830.3	0.091	15830.3	-0.000518058	15830.3	0.27252	15830.3	0.000603998	15830.3	-0.000612901	15830.3	1.1046	15830.3	0.2087	15830.3	0.0227	15830.3	0.000220706	15830.3	0.19819
15811.3	0.000216168	15811.3	0.23158	15811.3	-0.000605894	15811.3	0.0915	15811.3	-2.82529e-06	15811.3	0.27156	15811.3	0.000805894	15811.3	-0.000151108	15811.3	1.10429	15811.3	0.2125	15811.3	0.0226	15811.3	-0.00222449	15811.3	0.19664
15792.3	2.05912e-05	15792.3	0.22908	15792.3	-0.000483678	15792.3	0.092	15792.3	0.00111189	15792.3	0.271	15792.3	0.000907305	15792.3	-0.000423975	15792.3	1.10394	15792.3	0.2171	15792.3	0.0228	15792.3	-0.00256969	15792.3	0.19659
15773.4	-0.000375236	15773.4	0.22598	15773.4	-0.000461461	15773.4	0.0913	15773.4	0.000526093	15773.4	0.27114	15773.4	0.000208232	15773.4	0.000167815	15773.4	1.1035	15773.4	0.2252	15773.4	0.0226	15773.4	-0.00321488	15773.4	0.19574
15754.2	-0.000369946	15754.2	0.22478	15754.2	-0.000637636	15754.2	0.0904	15754.2	-5.74101e-05	15754.2	0.27058	15754.2	0.000111313	15754.2	-8.19137e-05	15754.2	1.10297	15754.2	0.2342	15754.2	0.0224	15754.2	0.00174064	15754.2	0.19109
15735.4	0.000133726	15735.4	0.22268	15735.4	-0.00081542	15735.4	0.0908	15735.4	-0.000344239	15735.4	0.27132	15735.4	1.12741e-05	15735.4	-0.0010113	15735.4	1.1024	15735.4	0.2445	15735.4	0.0217	15735.4	0.00207744	15735.4	0.18634
15716.6	0.00013715	15716.6	0.21928	15716.6	-0.0011932	15716.6	0.0906	15716.6	-3.15775e-05	15716.6	0.27116	15716.6	1.07573e-05	15716.6	-0.00107484	15716.6	1.10183	15716.6	0.2564	15716.6	0.0213	15716.6	0.00091409	15716.6	0.18549
15697.8	0.000540328	15697.8	0.21538	15697.8	-0.000870987	15697.8	0.091	15697.8	0.000480577	15697.8	0.27069	15697.8	0.000509765	15697.8	-0.000493579	15697.8	1.10125	15697.8	0.2688	15697.8	0.0202	15697.8	-0.00184926	15697.8	0.18244
15679.1	0.000243259	15679.1	0.21378	15679.1	-0.00064877	15679.1	0.0901	15679.1	0.000392225	15679.1	0.27033	15679.1	0.000308298	15679.1	-4.00548e-05	15679.1	1.10067	15679.1	0.2814	15679.1	0.0198	15679.1	-0.0037126	15679.1	0.18269
15660.2	-0.000352705	15660.2	0.21209	15660.2	-0.00102495	15660.2	0.0902	15660.2	0.000606145	15660.2	0.26987	15660.2	0.00100896	15660.2	0.000360959	15660.2	1.10004	15660.2	0.2946	15660.2	0.02	15660.2	-0.00257941	15660.2	0.18374
15641.6	4.97344e-05	15641.6	0.20979	15641.6	-0.000291128	15641.6	0.0895	15641.6	0.00131678	15641.6	0.27101	15641.6	0.000906544	15641.6	0.000450279	15641.6	1.09936	15641.6	0.3084	15641.6	0.0189	15641.6	-0.00184276	15641.6	0.18859
15623	5.19303e-05	15623	0.20799	15623	-0.000720839	15623	0.0897	15623	-7.30827e-05	15623	0.27055	15623	0.00140366	15623	0.000193638	15623	1.09864	15623	0.3223	15623	0.0186	15623	-0.00320611	15623	0.19284
15604.5	0.000253884	15604.5	0.20729	15604.5	-0.000950549	15604.5	0.0897	15604.5	0.00103655	15604.5	0.26938	15604.5	0.000900305	15604.5	-0.000683567	15604.5	1.09788	15604.5	0.3353	15604.5	0.0193	15604.5	0.000430547	15604.5	0.20329
15586	0.000755596	15586	0.20529	15586	-0.00078026	15586	0.0899	15586	0.0019457	15586	0.26862	15586	-0.000103515	15586	-0.000127088	15586	1.09713	15586	0.3477	15586	0.0185	15586	-0.0014328	15586	0.21213
15567.6	0.000457067	15567.6	0.20339	15567.6	-0.00130997	15567.6	0.088	15567.6	0.00125434	15567.6	0.26975	15567.6	0.000292202	15567.6	0	15567.6	1.09639	15567.6	0.3606	15567.6	0.0182	15567.6	-0.00339615	15567.6	0.22258
15549	0.000459629	15549	0.20259	15549	-0.000337442	15549	0.0883	15549	0.00136523	15549	0.26909	15549	-0.000309978	15549	-0.00010758	15549	1.09569	15549	0.3722	15549	0.018	15549	-0.00166296	15549	0.23543
15530.6	-0.000539381	15530.6	0.20029	15530.6	-0.000567153	15530.6	0.0885	15530.6	0.00117289	15530.6	0.26893	15530.6	-0.00101519	15530.6	-0.000777973	15530.6	1.09509	15530.6	0.3803	15530.6	0.0178	15530.6	-0.0012263	15530.6	0.25128
15512.3	-0.00083863	15512.3	0.19789	15512.3	-0.000896864	15512.3	0.0891	15512.3	0.000880051	15512.3	0.26866	15512.3	-0.000420864	15512.3	-0.00103788	15512.3	1.09459	15512.3	0.3882	15512.3	0.0174	15512.3	-0.000189649	15512.3	0.26273
15494	0.000261884	15494	0.19719	15494	-0.000326575	15494	0.0875	15494	0.000886729	15494	0.2689	15494	0.000473006	15494	-0.00107951	15494	1.0942	15494	0.3938	15494	0.018	15494	0.000447004	15494	0.26698
15475.8	-0.000237839	15475.8	0.19599	15475.8	-0.00105629	15475.8	0.088	15475.8	0.00149292	15475.8	0.26893	15475.8	0.00036642	15475.8	-0.000428261	15475.8	1.0939	15475.8	0.3991	15475.8	0.017	15475.8	-0.000316342	15475.8	0.27152
15457.6	0.000462203	15457.6	0.19469	15457.6	-8.59964e-05	15457.6	0.0875	15457.6	0.00139863	15457.6	0.26907	15457.6	0.00075938	15457.6	0.000412386	15457.6	1.09362	15457.6	0.406	15457.6	0.0175	15457.6	-0.00247969	15457.6	0.26557
15439.5	0.000262011	15439.5	0.19359	15439.5	-0.000815707	15439.5	0.0878	15439.5	0.00160385	15439.5	0.2694	15439.5	0.00105189	15439.5	-0.000126937	15439.5	1.09332	15439.5	0.4139	15439.5	0.0181	15439.5	-0.00454303	15439.5	0.25772
15421.4	0.000161584	15421.4	0.19179	15421.4	-0.000745418	15421.4	0.088	15421.4	0.00160859	15421.4	0.26933	15421.4	0.00154394	15421.4	-6.23925e-05	15421.4	1.09294	15421.4	0.4214	15421.4	0.0186	15421.4	-0.00300638	15421.4	0.24777
15403.3	0.000360924	15403.3	0.18939	15403.3	-0.00117513	15403.3	0.088	15403.3	0.00141286	15403.3	0.26957	15403.3	0.000635548	15403.3	4.32093e-05	15403.3	1.09249	15403.3	0.4301	15403.3	0.0181	15403.3	-0.00516973	15403.3	0.23681
15385.3	0.000260032	15385.3	0.18799	15385.3	-0.00060484	15385.3	0.0879	15385.3	0.00161664	15385.3	0.2691	15385.3	0.00112671	15385.3	0.000814809	15385.3	1.09199	15385.3	0.4403	15385.3	0.0175	15385.3	-0.00863307	15385.3	0.21976
15367.4	-4.10921e-05	15367.4	0.1866	15367.4	-0.000434551	15367.4	0.0869	15367.4	0.000919954	15367.4	0.26953	15367.4	0.000917416	15367.4	0.00116793	15367.4	1.0915	15367.4	0.4502	15367.4	0.0177	15367.4	-0.00819642	15367.4	0.20281
15349.2	-0.00014115	15349.2	0.1845	15349.2	-0.000462021	15349.2	0.0863	15349.2	0.00142546	15349.2	0.26887	15349.2	0.000410183	15349.2	0.000176675	15349.2	1.0911	15349.2	0.4577	15349.2	0.0169	15349.2	-0.00446323	15349.2	0.18746
15331.3	-0.000342737	15331.3	0.1818	15331.3	-0.000791732	15331.3	0.0862	15331.3	0.000427813	15331.3	0.2692	15331.3	0	15331.3	0.000192971	15331.3	1.09081	15331.3	0.4649	15331.3	0.0162	15331.3	-0.000626578	15331.3	0.1765
15313.5	-4.45538e-05	15313.5	0.1812	15313.5	-0.000921443	15313.5	0.0863	15313.5	0.0013297	15313.5	0.26943	15313.5	0.000669462	15313.5	0.000982871	15313.5	1.09065	15313.5	0.4742	15313.5	0.0162	15313.5	0.000210076	15313.5	0.16635
15295.7	-4.65985e-05	15295.7	0.1813	15295.7	-0.000551154	15295.7	0.0872	15295.7	0.00203111	15295.7	0.26966	15295.7	0.000638529	15295.7	0.00110188	15295.7	1.09057	15295.7	0.4833	15295.7	0.0153	15295.7	-5.32704e-05	15295.7	0.1554
15277.9	-0.000248871	15277.9	0.1787	15277.9	-0.000280865	15277.9	0.0869	15277.9	0.00173206	15277.9	0.26929	15277.9	0.0020072	15277.9	0.00121705	15277.9	1.09054	15277.9	0.4916	15277.9	0.0143	15277.9	-0.000616617	15277.9	0.14544
15260.2	-0.000451369	15260.2	0.1772	15260.2	-0.000510576	15260.2	0.0861	15260.2	0.000932546	15260.2	0.26902	15260.2	0.00117549	15260.2	0.00167045	15260.2	1.09051	15260.2	0.4998	15260.2	0.0144	15260.2	-0.00387996	15260.2	0.13929
15242.5	0.000145906	15242.5	0.175	15242.5	-0.000640287	15242.5	0.0866	15242.5	0.00133256	15242.5	0.26875	15242.5	0.00144338	15242.5	0.0023995	15242.5	1.09046	15242.5	0.5087	15242.5	0.0138	15242.5	-0.00224331	15242.5	0.13424
15224.9	-0.000657044	15224.9	0.1726	15224.9	-0.000269998	15224.9	0.0859	15224.9	0.00133212	15224.9	0.26988	15224.9	0.00111089	15224.9	0.00289352	15224.9	1.09041	15224.9	0.5184	15224.9	0.0133	15224.9	-0.00170666	15224.9	0.12968
15207.3	-0.000560218	15207.3	0.1697	15207.3	-0.000199709	15207.3	0.0866	15207.3	0.00113121	15207.3	0.27001	15207.3	0.000678005	15207.3	0.00217752	15207.3	1.09037	15207.3	0.527	15207.3	0.0137	15207.3	-0.00217	15207.3	0.12443
15189.7	-0.000163616	15189.7	0.1676	15189.7	-0.00102942	15189.7	0.0868	15189.7	0.000729848	15189.7	0.27034	15189.7	0.000944737	15189.7	0.00172903	15189.7	1.09036	15189.7	0.5334	15189.7	0.0137	15189.7	-0.00503335	15189.7	0.11788
15172.2	0.000132764	15172.2	0.1665	15172.2	-0.000759131	15172.2	0.0865	15172.2	-7.1976e-05	15172.2	0.27027	15172.2	0.000811085	15172.2	0.00170356	15172.2	1.09039	15172.2	0.5356	15172.2	0.0134	15172.2	-0.00389669	15172.2	0.11282
15154.7	-0.000371079	15154.7	0.1655	15154.7	-0.000388842	15154.7	0.0868	15154.7	0.000525744	15154.7	0.2713	15154.7	0.00157705	15154.7	0.000659278	15154.7	1.09042	15154.7	0.5342	15154.7	0.0127	15154.7	-0.00236004	15154.7	0.10747
15137.3	-0.000175143	15137.3	0.1649	15137.3	-1.85528e-05	15137.3	0.0878	15137.3	0.000623008	15137.3	0.27153	15137.3	0.00154263	15137.3	0.0007226	15137.3	1.09038	15137.3	0.5296	15137.3	0.0123	15137.3	-0.00242339	15137.3	0.09851
15120.1	-8.06848e-05	15120.1	0.1629	15120.1	-0.000450504	15120.1	0.0865	15120.1	0.000817233	15120.1	0.27175	15120.1	0.000805663	15120.1	0.00192236	15120.1	1.09025	15120.1	0.5198	15120.1	0.0127	15120.1	-0.00398327	15120.1	0.09136
15102.8	0.00101	15102.8	0.1621	15102.8	0.000619785	15102.8	0.0866	15102.8	0.000213599	15102.8	0.27178	15102.8	0.00127049	15102.8	0.000839684	15102.8	1.08996	15102.8	0.5062	15102.8	0.0125	15102.8	-0.00294661	15102.8	0.0882
15085.5	0.000610094	15085.5	0.16041	15085.5	0.000890074	15085.5	0.0863	15085.5	0.000509514	15085.5	0.27241	15085.5	0.00183494	15085.5	0.00129058	15085.5	1.08952	15085.5	0.4869	15085.5	0.0123	15085.5	-0.00100996	15085.5	0.08355
15068.2	0.000305156	15068.2	0.15881	15068.2	-0.000139637	15068.2	0.0868	15068.2	0.000404981	15068.2	0.27154	15068.2	0.00119901	15068.2	0.000358893	15068.2	1.08894	15068.2	0.4654	15068.2	0.0133	15068.2	-0.00247331	15068.2	0.0815
15050.9	0	15050.9	0.15951	15050.9	0.000130652	15050.9	0.0864	15050.9	0	15050.9	0.27151	15050.9	0.00266271	15050.9	0.00068874	15050.9	1.08832	15050.9	0.4425	15050.9	0.0121	15050.9	-0.00193665	15050.9	0.07994
15033.8	0.00038428	15033.8	0.15791	15033.8	0.000300941	15033.8	0.0862	15033.8	0.000231224	15033.8	0.27202	15033.8	0.00202604	15033.8	0.000318604	15033.8	1.08772	15033.8	0.4197	15033.8	0.0122	15033.8	0	15033.8	0.07519
15016.6	0.000168367	15016.6	0.15591	15016.6	-0.00052877	15016.6	0.086	15016.6	6.19193e-05	15016.6	0.27213	15016.6	0.00158899	15016.6	-0.00022259	15016.6	1.0872	15016.6	0.3966	15016.6	0.0124	15016.6	-0.000888058	15016.6	0.07313
14999.5	0.000252263	14999.5	0.15311	14999.5	-0.000558481	14999.5	0.0858	14999.5	0.000692089	14999.5	0.27204	14999.5	0.000951566	14999.5	0.000204029	14999.5	1.0868	14999.5	0.3732	14999.5	0.012	14999.5	-7.61157e-05	14999.5	0.07038
14982.4	-0.000164033	14982.4	0.15171	14982.4	1.1808e-05	14982.4	0.0855	14982.4	0.000821735	14982.4	0.27245	14982.4	0.000513775	14982.4	0.001257	14982.4	1.08651	14982.4	0.3489	14982.4	0.0129	14982.4	-6.41735e-05	14982.4	0.06652
14965.4	-8.05188e-05	14965.4	0.15061	14965.4	-0.000517903	14965.4	0.0853	14965.4	0.000250858	14965.4	0.27356	14965.4	0.00147562	14965.4	0.000500144	14965.4	1.08632	14965.4	0.3234	14965.4	0.0124	14965.4	0.000347769	14965.4	0.06807
14948.4	-0.000197194	14948.4	0.14931	14948.4	-0.000547614	14948.4	0.0848	14948.4	7.94606e-05	14948.4	0.27367	14948.4	0.000437088	14948.4	0.000928847	14948.4	1.08618	14948.4	0.3002	14948.4	0.0114	14948.4	-0.00364029	14948.4	0.06791
14931.6	-1.51518e-05	14931.6	0.14781	14931.6	-0.000979565	14931.6	0.0846	14931.6	-0.000895453	14931.6	0.27188	14931.6	0.00129608	14931.6	0.000283832	14931.6	1.08604	14931.6	0.2787	14931.6	0.0115	14931.6	-0.0047285	14931.6	0.06655
14914.7	-3.22025e-05	14914.7	0.14631	14914.7	-0.00160928	14914.7	0.0838	14914.7	-0.00036788	14914.7	0.27148	14914.7	0.00205682	14914.7	0.000366471	14914.7	1.08584	14914.7	0.2606	14914.7	0.0112	14914.7	-0.00461656	14914.7	0.0645
14897.8	0.000650559	14897.8	0.14451	14897.8	-0.00193899	14897.8	0.0843	14897.8	-0.000940822	14897.8	0.27169	14897.8	0.0019172	14897.8	0.00129849	14897.8	1.08556	14897.8	0.2439	14897.8	0.0107	14897.8	-0.00390462	14897.8	0.06234
14881	3.31331e-05	14881	0.14291	14881	-0.0015687	14881	0.0848	14881	-0.000514277	14881	0.2732	14881	0.000877223	14881	0.00176336	14881	1.08519	14881	0.2291	14881	0.0104	14881	-0.00399268	14881	0.06249
14864.1	-0.000184479	14864.1	0.14001	14864.1	-0.000998409	14864.1	0.0851	14864.1	-0.000488244	14864.1	0.27271	14864.1	0.00143688	14864.1	0.00161987	14864.1	1.08475	14864.1	0.2143	14864.1	0.0094	14864.1	-0.00308074	14864.1	0.06213
14847.4	-2.27744e-06	14847.4	0.13871	14847.4	-0.00142812	14847.4	0.0855	14847.4	-0.000362722	14847.4	0.27282	14847.4	0.000596177	14847.4	0.00200004	14847.4	1.08429	14847.4	0.1996	14847.4	0.0098	14847.4	-0.00476879	14847.4	0.06038
14830.6	-0.000120261	14830.6	0.13811	14830.6	-0.00125783	14830.6	0.0848	14830.6	-0.000637707	14830.6	0.27323	14830.6	0.00115512	14830.6	0.00163755	14830.6	1.08384	14830.6	0.1859	14830.6	0.0103	14830.6	-0.00375685	14830.6	0.06062
14814.2	-0.000339505	14814.2	0.13691	14814.2	-0.000989783	14814.2	0.0854	14814.2	0.00018385	14814.2	0.27364	14814.2	0.00111161	14814.2	0.00235638	14814.2	1.08343	14814.2	0.1726	14814.2	0.0097	14814.2	-0.00154507	14814.2	0.06286
14797.5	0.000142145	14797.5	0.13532	14797.5	-0.00101949	14797.5	0.0843	14797.5	-0.000192141	14797.5	0.27454	14797.5	0.00116984	14797.5	0.00263319	14797.5	1.08305	14797.5	0.1595	14797.5	0.0097	14797.5	-0.000533124	14797.5	0.06131
14780.9	0.000323612	14780.9	0.13432	14780.9	-0.000649205	14780.9	0.084	14780.9	-0.000668635	14780.9	0.27425	14780.9	0.00112771	14780.9	0.00205231	14780.9	1.08271	14780.9	0.1475	14780.9	0.0094	14780.9	-0.000421182	14780.9	0.05755
14764.3	-0.000295104	14764.3	0.13112	14764.3	-0.00127892	14764.3	0.0843	14764.3	-0.000345631	14764.3	0.27376	14764.3	0.00078523	14764.3	0.00194659	14764.3	1.0824	14764.3	0.1364	14764.3	0.0089	14764.3	-0.00120924	14764.3	0.05719
14747.7	0.000285998	14747.7	0.13052	14747.7	-0.00160863	14747.7	0.084	14747.7	-0.00112313	14747.7	0.27247	14747.7	0.000942395	14747.7	0.00125017	14747.7	1.08209	14747.7	0.1254	14747.7	0.009	14747.7	2.7027e-06	14747.7	0.05674
14731.4	0.000765854	14731.4	0.13032	14731.4	-0.00174058	14731.4	0.0836	14731.4	-0.000904038	14731.4	0.27378	14731.4	0.000697148	14731.4	0.00161737	14731.4	1.0818	14731.4	0.1148	14731.4	0.0085	14731.4	-0.000985512	14731.4	0.05628
14715	-0.000453405	14715	0.12902	14715	-0.000870289	14715	0.0843	14715	-0.000782522	14715	0.27219	14715	0.00105361	14715	0.000543622	14715	1.08153	14715	0.1054	14715	0.0081	14715	-0.00107357	14715	0.05722
14698.5	2.71565e-05	14698.5	0.12782	14698.5	0	14698.5	0.0846	14698.5	-0.0001615	14698.5	0.2729	14698.5	0.00160973	14698.5	0.000494471	14698.5	1.08128	14698.5	0.0965	14698.5	0.007	14698.5	-0.00266163	14698.5	0.05977
14682.1	0.000607538	14682.1	0.12572	14682.1	0.000236569	14682.1	0.0846	14682.1	-0.000140972	14682.1	0.2726	14682.1	0.0011655	14682.1	0.00100876	14682.1	1.08106	14682.1	0.089	14682.1	0.0072	14682.1	-0.00114969	14682.1	0.06021
14666	0.000186686	14666	0.12352	14666	-2.99755e-05	14666	0.0843	14666	-0.000523828	14666	0.27341	14666	0.000718881	14666	0.00104577	14666	1.08085	14666	0.0822	14666	0.0073	14666	-0.000737901	14666	0.06145
14649.7	0.000766711	14649.7	0.12172	14649.7	6.59314e-06	14649.7	0.0848	14649.7	-0.000904275	14649.7	0.27312	14649.7	0.000873961	14649.7	0.000702904	14649.7	1.08063	14649.7	0.0758	14649.7	0.0079	14649.7	-0.00302596	14649.7	0.065
14633.4	0.00105	14633.4	0.12102	14633.4	-0.00135684	14633.4	0.0864	14633.4	-0.00108521	14633.4	0.27273	14633.4	0.0011287	14633.4	-9.3026e-05	14633.4	1.08038	14633.4	0.071	14633.4	0.0086	14633.4	-0.00261402	14633.4	0.06914
14617.1	0.00032623	14617.1	0.12032	14617.1	-0.00132027	14617.1	0.0869	14617.1	-0.00126663	14617.1	0.27214	14617.1	0.000583088	14617.1	0.000852746	14617.1	1.08006	14617.1	0.0665	14617.1	0.0087	14617.1	-0.00150207	14617.1	0.07518
14601.1	0.000304679	14601.1	0.11892	14601.1	-0.000286814	14601.1	0.0863	14601.1	-0.00185141	14601.1	0.27185	14601.1	0.000635112	14601.1	0.00207911	14601.1	1.07967	14601.1	0.063	14601.1	0.0094	14601.1	-0.000690289	14601.1	0.07802
14584.9	8.39982e-05	14584.9	0.11752	14584.9	-0.00115025	14584.9	0.0855	14584.9	-0.00223379	14584.9	0.27125	14584.9	0.000488824	14584.9	0.00169907	14584.9	1.07919	14584.9	0.0598	14584.9	0.0092	14584.9	-0.00127835	14584.9	0.07997
14568.8	0.000463142	14568.8	0.11632	14568.8	-0.000513676	14568.8	0.0865	14568.8	-0.00131666	14568.8	0.27166	14568.8	0.0011422	14568.8	0.00232385	14568.8	1.07862	14568.8	0.057	14568.8	0.0086	14568.8	-0.0013664	14568.8	0.08631
14552.9	-5.89267e-05	14552.9	0.11462	14552.9	-0.00108022	14552.9	0.0867	14552.9	-0.00130285	14552.9	0.27117	14552.9	0.00109322	14552.9	0.0021355	14552.9	1.07803	14552.9	0.054	14552.9	0.0094	14552.9	-0.00265462	14552.9	0.08825
14536.8	0.00021987	14536.8	0.11443	14536.8	-0.00154365	14536.8	0.0869	14536.8	-0.00158667	14536.8	0.27098	14536.8	-5.40845e-05	14536.8	4.30205e-05	14536.8	1.0774	14536.8	0.0523	14536.8	0.0082	14536.8	-0.00234268	14536.8	0.08769
14520.7	9.84929e-05	14520.7	0.11323	14520.7	-0.00170708	14520.7	0.0856	14520.7	-0.00177097	14520.7	0.27149	14520.7	9.82772e-05	14520.7	0.000333615	14520.7	1.07676	14520.7	0.05	14520.7	0.0088	14520.7	-0.00163074	14520.7	0.08633
14504.9	0.000475911	14504.9	0.11193	14504.9	-0.00207363	14504.9	0.0855	14504.9	-0.00115857	14504.9	0.2708	14504.9	0.000248305	14504.9	0.00126029	14504.9	1.07616	14504.9	0.0486	14504.9	0.0096	14504.9	-0.00041895	14504.9	0.08878
14489	-0.00034581	14489	0.11093	14489	-0.00203706	14489	0.085	14489	-0.00134381	14489	0.2703	14489	0	14489	0.000656073	14489	1.07561	14489	0.0475	14489	0.0094	14489	-0.00190701	14489	0.09122
14473	0.000132297	14473	0.10883	14473	-0.00230049	14473	0.0853	14473	-0.00162952	14473	0.27001	14473	-0.000111134	14473	0.0014158	14473	1.07516	14473	0.0461	14473	0.0095	14473	-0.00189507	14473	0.09036
14457.3	0.000709208	14457.3	0.10953	14457.3	-0.00216703	14457.3	0.0856	14457.3	-0.00101851	14457.3	0.26982	14457.3	-0.00042516	14457.3	0.0016367	14457.3	1.0748	14457.3	0.0449	14457.3	0.0091	14457.3	-0.00218328	14457.3	0.0965
14441.5	0.000386974	14441.5	0.10793	14441.5	-0.00213047	14441.5	0.0846	14441.5	-0.000705156	14441.5	0.26903	14441.5	-0.000437117	14441.5	0.00146632	14441.5	1.0745	14441.5	0.0438	14441.5	0.0084	14441.5	-0.00277134	14441.5	0.09854
14425.6	-3.54298e-05	14425.6	0.10643	14425.6	-0.0019939	14425.6	0.0841	14425.6	-0.00209227	14425.6	0.26784	14425.6	-0.000749486	14425.6	0.00156101	14425.6	1.07424	14425.6	0.043	14425.6	0.0074	14425.6	-0.0050594	14425.6	0.10408
14410.1	-0.000359022	14410.1	0.10433	14410.1	-0.00216044	14410.1	0.0837	14410.1	-0.00138264	14410.1	0.26614	14410.1	-0.000864727	14410.1	0.00223598	14410.1	1.07401	14410.1	0.0423	14410.1	0.0067	14410.1	-0.000947612	14410.1	0.11293
14394.3	1.82372e-05	14394.3	0.10543	14394.3	-0.00142387	14394.3	0.0833	14394.3	-0.00237068	14394.3	0.26615	14394.3	-0.00127791	14394.3	0.00233018	14394.3	1.07378	14394.3	0.0416	14394.3	0.0061	14394.3	0.00196433	14394.3	0.11327
14378.6	9.5327e-05	14378.6	0.10473	14378.6	-0.0023873	14378.6	0.0835	14378.6	-0.00205918	14378.6	0.26566	14378.6	-0.000591505	14378.6	0.00192007	14378.6	1.07351	14378.6	0.0414	14378.6	0.0052	14378.6	0.00277627	14378.6	0.10531
14363.1	0.000471238	14363.1	0.10333	14363.1	-0.00135385	14363.1	0.0823	14363.1	-0.00175092	14363.1	0.26447	14363.1	0.000592051	14363.1	0.00187039	14363.1	1.07317	14363.1	0.041	14363.1	0.005	14363.1	0.00248806	14363.1	0.08665
14347.4	0.000347994	14347.4	0.10333	14347.4	-0.00211728	14347.4	0.0826	14347.4	-0.00184034	14347.4	0.26478	14347.4	0.00017765	14347.4	0.00193416	14347.4	1.07277	14347.4	0.0404	14347.4	0.0052	14347.4	0	14347.4	0.06959
14332	2.35757e-05	14332	0.10293	14332	-0.00148382	14332	0.0827	14332	-0.00233298	14332	0.26419	14332	0.000360412	14332	0.0011291	14332	1.07232	14332	0.0398	14332	0.0048	14332	0.000253312	14332	0.05663
14316.4	0	14316.4	0.10093	14316.4	-0.00134725	14316.4	0.0814	14316.4	-0.0022233	14316.4	0.26259	14316.4	-0.00055479	14316.4	0.00228816	14316.4	1.07184	14316.4	0.0396	14316.4	0.0045	14316.4	0.000104669	14316.4	0.04817
14301	-0.000262955	14301	0.09923	14301	-0.000913799	14301	0.0807	14301	-0.00191684	14301	0.2617	14301	0.000227182	14301	0.00210834	14301	1.07134	14301	0.039	14301	0.0042	14301	-0.00124202	14301	0.04061
14285.5	-0.000325497	14285.5	0.09703	14285.5	-0.00097723	14285.5	0.0804	14285.5	-0.00200807	14285.5	0.26061	14285.5	0.000411183	14285.5	0.000265965	14285.5	1.07084	14285.5	0.0389	14285.5	0.0037	14285.5	-0.00449066	14285.5	0.03415
14270	0.00031188	14270	0.09574	14270	-0.00124066	14270	0.0809	14270	-0.00169975	14270	0.26012	14270	0.00119478	14270	0.000918644	14270	1.07037	14270	0.0384	14270	0.0035	14270	-0.00333931	14270	0.03309
14254.8	-0.000451314	14254.8	0.09464	14254.8	-0.000807206	14254.8	0.0805	14254.8	-0.00199462	14254.8	0.25893	14254.8	0.000175581	14254.8	0.00237738	14254.8	1.06997	14254.8	0.0382	14254.8	0.004	14254.8	0.00101401	14254.8	0.03123
14239.3	0.000585902	14239.3	0.09544	14239.3	0.000429363	14239.3	0.0795	14239.3	-0.0026872	14239.3	0.25873	14239.3	0.000358394	14239.3	0.00241365	14239.3	1.06961	14239.3	0.0381	14239.3	0.0035	14239.3	0.00316536	14239.3	0.02847
14224.1	0.000922549	14224.1	0.09494	14224.1	-0.000737181	14224.1	0.0794	14224.1	-0.00168295	14224.1	0.25794	14224.1	-6.15865e-05	14224.1	0.000951161	14224.1	1.06927	14224.1	0.0383	14224.1	0.0027	14224.1	0.000318675	14224.1	0.02251
14208.8	0.000759606	14208.8	0.09334	14208.8	-0.00100061	14208.8	0.0789	14208.8	-0.00167642	14208.8	0.25685	14208.8	0.00132044	14208.8	0.00110096	14208.8	1.06895	14208.8	0.038	14208.8	0.003	14208.8	0.00347003	14208.8	0.01795
14193.7	0.000996097	14193.7	0.09174	14193.7	-0.000967157	14193.7	0.0794	14193.7	-0.00127304	14193.7	0.25696	14193.7	0.00199969	14193.7	0.000853318	14193.7	1.06866	14193.7	0.0385	14193.7	0.0026	14193.7	0.00672334	14193.7	0.01699
14178.4	0.000832995	14178.4	0.09134	14178.4	-0.000830588	14178.4	0.0794	14178.4	-0.0013674	14178.4	0.25576	14178.4	0.00138094	14178.4	0.000329041	14178.4	1.06841	14178.4	0.0387	14178.4	0.0021	14178.4	0.0048747	14178.4	0.01643
14163.3	0.000469329	14163.3	0.09064	14163.3	-0.000597132	14163.3	0.0789	14163.3	-0.000564892	14163.3	0.25457	14163.3	0.00125942	14163.3	-0.000139909	14163.3	1.06819	14163.3	0.0384	14163.3	0.0016	14163.3	0.00392801	14163.3	0.01537
14148.1	-0.00029393	14148.1	0.08964	14148.1	0.000139436	14148.1	0.0788	14148.1	-0.000960123	14148.1	0.25388	14148.1	0.000839898	14148.1	-0.00016221	14148.1	1.06804	14148.1	0.0387	14148.1	0	14148.1	0.00267937	14148.1	0.01511
14133.1	-5.77507e-05	14133.1	0.08874	14133.1	0.000572892	14133.1	0.0783	14133.1	-0.00111257	14133.1	0.25369	14133.1	0.000917619	14133.1	0.00155078	14133.1	1.06794	14133.1	0.0389	14133.1	0.0013	14133.1	0.00613268	14133.1	0.01615
14117.9	-0.000221167	14117.9	0.08804	14117.9	0.000609461	14117.9	0.0782	14117.9	-0.00166401	14117.9	0.2526	14117.9	0.000197326	14117.9	0.00112622	14117.9	1.06783	14117.9	0.04	14117.9	0.0013	14117.9	0.00748404	14117.9	0.01389
14103	1.48588e-05	14103	0.08644	14103	-5.70833e-05	14103	0.077	14103	-0.00191618	14103	0.2519	14103	0.00097429	14103	0.00162854	14103	1.06765	14103	0.0393	14103	0.002	14103	0.00603735	14103	0.01493
14087.9	5.12871e-05	14087.9	0.08664	14087.9	0.000279485	14087.9	0.078	14087.9	-0.00176782	14087.9	0.25091	14087.9	0.000553233	14087.9	0.00095028	14087.9	1.06732	14087.9	0.0393	14087.9	0.0026	14087.9	0.00518871	14087.9	0.01447
14073	-1.28404e-05	14073	0.08564	14073	0.000212941	14073	0.078	14073	-0.0012202	14073	0.25042	14073	-0.000370554	14073	0.000335346	14073	1.06684	14073	0.0399	14073	0.0035	14073	0.00534202	14073	0.01081
14058	-0.000876567	14058	0.08364	14058	4.95098e-05	14058	0.0767	14058	-0.000972045	14058	0.24943	14058	-0.000392371	14058	0.00084959	14058	1.06619	14058	0.0398	14058	0.0045	14058	0.00519338	14058	0.01065
14043.2	0.000259154	14043.2	0.08334	14043.2	-0.000217034	14043.2	0.0761	14043.2	-0.00142462	14043.2	0.24843	14043.2	-0.000116906	14043.2	0.00137871	14043.2	1.06543	14043.2	0.0402	14043.2	0.0051	14043.2	0.00304669	14043.2	0.00929
14028.4	-5.20076e-06	14028.4	0.08365	14028.4	-0.000783578	14028.4	0.0754	14028.4	-0.0015773	14028.4	0.24734	14028.4	0.000258191	14028.4	0.00148214	14028.4	1.06461	14028.4	0.041	14028.4	0.0059	14028.4	0	14028.4	0.00813
14013.5	-6.91566e-05	14013.5	0.08125	14013.5	-0.00164701	14013.5	0.0756	14013.5	-0.00192945	14013.5	0.24615	14013.5	0.000135247	14013.5	0.00114505	14013.5	1.06381	14013.5	0.0417	14013.5	0.0075	14013.5	0.00124512	14013.5	0.00897
13998.7	0.000166338	13998.7	0.07925	13998.7	-0.00171355	13998.7	0.0759	13998.7	-0.00178233	13998.7	0.24446	13998.7	9.60344e-06	13998.7	0.000852879	13998.7	1.06314	13998.7	0.0424	13998.7	0.0076	13998.7	0.00180544	13998.7	0.00881
13983.9	0.00030223	13983.9	0.07995	13983.9	-0.00117699	13983.9	0.0748	13983.9	-0.00223468	13983.9	0.24367	13983.9	8.59118e-05	13983.9	0.00157337	13983.9	1.06264	13983.9	0.0431	13983.9	0.0071	13983.9	0.00195056	13983.9	0.00735
13969.2	-0.000462425	13969.2	0.08045	13969.2	-0.000943529	13969.2	0.0748	13969.2	-0.00198776	13969.2	0.24147	13969.2	0.000559533	13969.2	0.00159676	13969.2	1.06231	13969.2	0.0433	13969.2	0.0071	13969.2	-0.000889117	13969.2	0.00758
13954.6	-0.000527154	13954.6	0.07895	13954.6	0.000289926	13954.6	0.0745	13954.6	-0.00254094	13954.6	0.23988	13954.6	0.000832791	13954.6	0.000854241	13954.6	1.06212	13954.6	0.0442	13954.6	0.0064	13954.6	-0.0014288	13954.6	0.00692
13939.8	-9.14874e-05	13939.8	0.07945	13939.8	-7.35049e-05	13939.8	0.0737	13939.8	-0.00279359	13939.8	0.23849	13939.8	0.00100799	13939.8	-0.000385956	13939.8	1.06204	13939.8	0.045	13939.8	0.0052	13939.8	1.63238e-05	13939.8	0.00386
13925.2	-0.000456365	13925.2	0.07875	13925.2	-4.0049e-05	13925.2	0.0743	13925.2	-0.00274696	13925.2	0.2372	13925.2	0.00098052	13925.2	-0.000574142	13925.2	1.06203	13925.2	0.0461	13925.2	0.0042	13925.2	0.000576642	13925.2	-0.0015
13910.5	0.000479152	13910.5	0.07775	13910.5	0.00069652	13910.5	0.074	13910.5	-0.000899812	13910.5	0.2365	13910.5	0.00145498	13910.5	0.000518829	13910.5	1.06207	13910.5	0.047	13910.5	0.0032	13910.5	0.00232177	13910.5	0.000238417
13896	0.000114127	13896	0.07735	13896	0.00112998	13896	0.0742	13896	-0.00085338	13896	0.23571	13896	0.00102679	13896	0.000828929	13896	1.06213	13896	0.0472	13896	0.003	13896	8.20836e-05	13896	0.00268
13881.6	-0.00015097	13881.6	0.07555	13881.6	6.34314e-05	13881.6	0.0745	13881.6	-0.00130705	13881.6	0.23302	13881.6	0.000798238	13881.6	0.000474305	13881.6	1.0622	13881.6	0.0481	13881.6	0.0028	13881.6	0.000442402	13881.6	0.00241
13866.9	0.000184324	13866.9	0.07565	13866.9	0	13866.9	0.0731	13866.9	-0.00226019	13866.9	0.23223	13866.9	0.000971608	13866.9	0.000764219	13866.9	1.06225	13866.9	0.0497	13866.9	0.0018	13866.9	0.000387525	13866.9	0.000553006
13852.5	0.000719081	13852.5	0.07705	13852.5	0.000942347	13852.5	0.0741	13852.5	-0.00031405	13852.5	0.23113	13852.5	0.00154234	13852.5	0.000225996	13852.5	1.06227	13852.5	0.0504	13852.5	0.0026	13852.5	-0.000552157	13852.5	0.000190875
13838.1	0.00105	13838.1	0.07655	13838.1	0.000384693	13838.1	0.074	13838.1	-0.001268	13838.1	0.22824	13838.1	0.00191272	13838.1	0.000689008	13838.1	1.06223	13838.1	0.0513	13838.1	0.0026	13838.1	0.00350816	13838.1	0.00123
13823.6	-1.11609e-05	13823.6	0.07535	13823.6	0.000328938	13823.6	0.0743	13823.6	-0.00292144	13823.6	0.22685	13823.6	0.00128501	13823.6	0.000897203	13823.6	1.06202	13823.6	0.0527	13823.6	0.0026	13823.6	0.00345328	13823.6	0.00537
13809.3	0.000423379	13809.3	0.07615	13809.3	0.000871284	13809.3	0.0736	13809.3	-0.00187559	13809.3	0.22546	13809.3	0.00155467	13809.3	0.00182978	13809.3	1.06162	13809.3	0.0533	13809.3	0.0024	13809.3	0.0035136	13809.3	0.0051
13795	-4.21523e-05	13795	0.07455	13795	0.000213631	13795	0.073	13795	-0.00102983	13795	0.22406	13795	0.000923989	13795	0.00146867	13795	1.06103	13795	0.0559	13795	0.0013	13795	7.39217e-05	13795	0.00574
13780.6	0.000192703	13780.6	0.07426	13780.6	0.00135788	13780.6	0.0733	13780.6	-0.00128356	13780.6	0.22237	13780.6	0.00129521	13780.6	0.00120312	13780.6	1.06026	13780.6	0.0579	13780.6	0.0005	13780.6	0.000119044	13780.6	0.00308
13766.3	2.70286e-05	13766.3	0.07706	13766.3	0.000700222	13766.3	0.0736	13766.3	-0.00253799	13766.3	0.22078	13766.3	0.000863818	13766.3	0.000597132	13766.3	1.05937	13766.3	0.0603	13766.3	0.0012	13766.3	-0.00122064	13766.3	0.00342
13752.1	0.000361283	13752.1	0.07646	13752.1	0.00134257	13752.1	0.0732	13752.1	-0.00129251	13752.1	0.21938	13752.1	0.000232082	13752.1	0.000197251	13752.1	1.05841	13752.1	0.0623	13752.1	0.002	13752.1	-0.000160319	13752.1	0.00195
13738	0.000295467	13738	0.07366	13738	0.000184915	13738	0.0736	13738	-0.00194713	13738	0.21779	13738	0	13738	0.000747007	13738	1.05742	13738	0.0651	13738	0.0026	13738	0	13738	-7.99212e-06
13723.6	-0.000669965	13723.6	0.07296	13723.6	0.000329159	13723.6	0.0732	13723.6	-0.00250124	13723.6	0.217	13723.6	0.00049458	13723.6	0.00071114	13723.6	1.05642	13723.6	0.0678	13723.6	0.0031	13723.6	-0.00476091	13723.6	0.000729671
13709.5	0.000464077	13709.5	0.07126	13709.5	7.1506e-05	13709.5	0.0725	13709.5	-0.00155605	13709.5	0.21571	13709.5	0.000987722	13709.5	0	13709.5	1.05548	13709.5	0.0709	13709.5	0.0044	13709.5	-0.00731838	13709.5	0.00307
13695.4	0.00019805	13695.4	0.07116	13695.4	0.000213853	13695.4	0.0721	13695.4	-0.00071095	13695.4	0.21441	13695.4	0.000980673	13695.4	-0.00124114	13695.4	1.05464	13695.4	0.0735	13695.4	0.0042	13695.4	-0.00517586	13695.4	0.0039
13681.4	3.19529e-05	13681.4	0.07046	13681.4	0.000856199	13681.4	0.072	13681.4	-0.00166594	13681.4	0.21152	13681.4	0.000973432	13681.4	0.000764767	13681.4	1.05392	13681.4	0.0759	13681.4	0.0042	13681.4	-0.00293333	13681.4	0.00584
13667.2	0.000166237	13667.2	0.06906	13667.2	0.000300444	13667.2	0.0714	13667.2	-0.00152043	13667.2	0.21083	13667.2	-3.27647e-05	13667.2	0.00106584	13667.2	1.05334	13667.2	0.0775	13667.2	0.0054	13667.2	-0.00239424	13667.2	0.00548
13653.2	0	13653.2	0.06666	13653.2	0.00014279	13653.2	0.0718	13653.2	-0.000675607	13653.2	0.20764	13653.2	-0.000140387	13653.2	0.000811199	13653.2	1.0529	13653.2	0.0802	13653.2	0.0062	13653.2	-0.00145172	13653.2	0.00581
13639.2	-0.000390716	13639.2	0.06606	13639.2	0.000185137	13639.2	0.0725	13639.2	-0.00113088	13639.2	0.20714	13639.2	-0.000748198	13639.2	0.000328581	13639.2	1.05259	13639.2	0.0835	13639.2	0.0065	13639.2	-0.00200919	13639.2	0.00425
13625.3	-8.14515e-05	13625.3	0.06536	13625.3	0.000227483	13625.3	0.0723	13625.3	-0.00108624	13625.3	0.20445	13625.3	-0.000756198	13625.3	0.000950487	13625.3	1.0524	13625.3	0.0875	13625.3	0.0065	13625.3	-0.00466667	13625.3	0.00441
13611.2	0.000227917	13611.2	0.06716	13611.2	0.000671728	13611.2	0.0722	13611.2	-0.0012411	13611.2	0.20226	13611.2	-0.000263163	13611.2	0.000650672	13611.2	1.05231	13611.2	0.092	13611.2	0.006	13611.2	-0.00462757	13611.2	0.00569
13597.3	0.000737144	13597.3	0.06786	13597.3	0.000914074	13597.3	0.0727	13597.3	-0.00129664	13597.3	0.20076	13597.3	-0.00067154	13597.3	0.000903136	13597.3	1.05232	13597.3	0.097	13597.3	0.0047	13597.3	-0.00408505	13597.3	0.00809
13583.4	0.000246352	13583.4	0.06916	13583.4	0.00125642	13583.4	0.0734	13583.4	-0.00105228	13583.4	0.19877	13583.4	0.000419896	13583.4	0.000935811	13583.4	1.05238	13583.4	0.1038	13583.4	0.0038	13583.4	-0.00184252	13583.4	0.01029
13569.6	0.000455541	13569.6	0.06906	13569.6	0.00159877	13569.6	0.0734	13569.6	-0.001008	13569.6	0.19688	13569.6	0.000311146	13569.6	0.000817781	13569.6	1.05248	13569.6	0.1097	13569.6	0.0038	13569.6	0	13569.6	0.01258
13555.8	0.000464712	13555.8	0.06727	13555.8	0.000841114	13555.8	0.0738	13555.8	-0.000463815	13555.8	0.19519	13555.8	0.00070221	13555.8	0.00103779	13555.8	1.05255	13555.8	0.1171	13555.8	0.0039	13555.8	-0.0010153	13555.8	0.01199
13542.1	-0.000226136	13542.1	0.06707	13542.1	0.000983461	13542.1	0.0736	13542.1	-0.00061972	13542.1	0.19349	13542.1	0.00029309	13542.1	0.00106484	13542.1	1.05257	13542.1	0.1245	13542.1	0.0039	13542.1	-0.0027306	13542.1	0.01499
13528.1	0.000383119	13528.1	0.06607	13528.1	0.00182771	13528.1	0.0739	13528.1	-0.000675128	13528.1	0.1915	13528.1	0.000284993	13528.1	0.000628723	13528.1	1.05254	13528.1	0.1325	13528.1	0.0038	13528.1	-0.0026541	13528.1	0.01698
13514.4	0.000192233	13514.4	0.06467	13514.4	0.000570052	13514.4	0.0738	13514.4	6.87868e-05	13514.4	0.19041	13514.4	-2.44988e-05	13514.4	0.0010029	13514.4	1.05243	13514.4	0.1418	13514.4	0.0039	13514.4	-0.0027694	13514.4	0.01938
13500.7	0.0011	13500.7	0.06307	13500.7	0.0012124	13500.7	0.0748	13500.7	-0.000787387	13500.7	0.18851	13500.7	-0.000634173	13500.7	0.00122306	13500.7	1.05221	13500.7	0.15	13500.7	0.0046	13500.7	-0.0031847	13500.7	0.02349
13487.1	0.000910407	13487.1	0.06267	13487.1	0.000654745	13487.1	0.0744	13487.1	-0.000443649	13487.1	0.18702	13487.1	-0.000944031	13487.1	0.0013313	13487.1	1.05186	13487.1	0.1596	13487.1	0.0055	13487.1	-0.0045	13487.1	0.0285
13473.5	0.000219466	13473.5	0.06337	13473.5	0.00109709	13473.5	0.0742	13473.5	0	13473.5	0.18493	13473.5	-0.00165407	13473.5	0.000632884	13473.5	1.05139	13473.5	0.1706	13473.5	0.0065	13473.5	-0.0038153	13473.5	0.0313
13459.9	0.000628507	13459.9	0.06277	13459.9	0.00103944	13459.9	0.0756	13459.9	-4.01896e-05	13459.9	0.18294	13459.9	-0.00106429	13459.9	8.60782e-05	13459.9	1.05082	13459.9	0.181	13459.9	0.0057	13459.9	-0.000830599	13459.9	0.03761
13446.3	0.00023753	13446.3	0.06287	13446.3	-0.000118215	13446.3	0.076	13446.3	-8.02981e-05	13446.3	0.18054	13446.3	-0.000474694	13446.3	0.000306612	13446.3	1.05018	13446.3	0.1937	13446.3	0.0063	13446.3	-0.0014459	13446.3	0.04392
13432.6	0.000146654	13432.6	0.06227	13432.6	-0.00107397	13432.6	0.078	13432.6	-0.000220859	13432.6	0.17815	13432.6	-0.000384086	13432.6	0.000974126	13432.6	1.04946	13432.6	0.206	13432.6	0.0062	13432.6	-0.0026694	13432.6	0.05182
13419	-4.43593e-05	13419	0.06177	13419	-0.00103162	13419	0.0814	13419	0.000339195	13419	0.17636	13419	-0.000494851	13419	0.00014175	13419	1.0487	13419	0.2199	13419	0.0052	13419	-0.0023847	13419	0.05754
13405.5	6.46089e-05	13405.5	0.06277	13405.5	0.000410722	13405.5	0.0899	13405.5	0.000599329	13405.5	0.17546	13405.5	-0.0010058	13405.5	0.000206593	13405.5	1.04789	13405.5	0.2329	13405.5	0.0046	13405.5	0	13405.5	0.06215
13392.1	-2.64409e-05	13392.1	0.06167	13392.1	0.00155307	13392.1	0.1031	13392.1	0.00105954	13392.1	0.17297	13392.1	-0.000616919	13392.1	0.00015268	13392.1	1.047	13392.1	0.248	13392.1	0.0039	13392.1	-0.000133333	13392.1	0.06956
13378.6	0.000282491	13378.6	0.06057	13378.6	0.00189542	13378.6	0.1077	13378.6	0.000319838	13378.6	0.17108	13378.6	7.17792e-05	13378.6	0.000875264	13378.6	1.046	13378.6	0.2614	13378.6	0.0045	13378.6	-0.00276667	13378.6	0.07868
13365.2	0.000891406	13365.2	0.05947	13365.2	0.000937762	13365.2	0.1025	13365.2	0.000880211	13365.2	0.16938	13365.2	6.02996e-05	13365.2	0.000930685	13365.2	1.0449	13365.2	0.275	13365.2	0.0038	13365.2	-0.0052	13365.2	0.0882
13351.8	-0.000199698	13351.8	0.05747	13351.8	0.000680108	13351.8	0.0999	13351.8	0.000640665	13351.8	0.16669	13351.8	-0.000151357	13351.8	-0.000169831	13351.8	1.04371	13351.8	0.2893	13351.8	0.0043	13351.8	-0.00623333	13351.8	0.09991
13338.5	0.000709181	13338.5	0.05787	13338.5	0.000122455	13338.5	0.1047	13338.5	0.0017012	13338.5	0.1653	13338.5	3.68089e-05	13338.5	0.000555853	13338.5	1.04248	13338.5	0.3034	13338.5	0.0057	13338.5	-0.00416667	13338.5	0.11353
13325.2	0.00112	13325.2	0.05818	13325.2	0.000264802	13325.2	0.1148	13325.2	0.00116181	13325.2	0.16251	13325.2	-0.000375201	13325.2	0.00161391	13325.2	1.04124	13325.2	0.3177	13325.2	0.0054	13325.2	0	13325.2	0.12575
13311.9	0.000426885	13311.9	0.05788	13311.9	7.14814e-06	13311.9	0.1207	13311.9	0.0012225	13311.9	0.16201	13311.9	0.00121261	13311.9	0.00177133	13311.9	1.04005	13311.9	0.3303	13311.9	0.005	13311.9	-0.000678571	13311.9	0.13548
13298.6	0.00033571	13298.6	0.05758	13298.6	0.00154949	13298.6	0.1191	13298.6	0.000783266	13298.6	0.15922	13298.6	0.000100252	13298.6	0.000761511	13298.6	1.03895	13298.6	0.3413	13298.6	0.005	13298.6	-0.00195714	13298.6	0.1418
13285.3	0.000744518	13285.3	0.05818	13285.3	0.00129184	13285.3	0.1124	13285.3	0.000844112	13285.3	0.15773	13285.3	0.000387717	13285.3	-6.59628e-06	13285.3	1.03794	13285.3	0.3529	13285.3	0.0042	13285.3	-0.00123571	13285.3	0.14142
13272.1	0.000453309	13272.1	0.05948	13272.1	0.000434188	13272.1	0.1111	13272.1	0.00140504	13272.1	0.15533	13272.1	-0.000624993	13272.1	-0.000689881	13272.1	1.03701	13272.1	0.3624	13272.1	0.0048	13272.1	-0.00231429	13272.1	0.14355
13258.9	-0.000637918	13258.9	0.05848	13258.9	0.000276534	13258.9	0.1179	13258.9	0.00186604	13258.9	0.15334	13258.9	-0.00103788	13258.9	-0.00091063	13258.9	1.03612	13258.9	0.3714	13258.9	0.0055	13258.9	-0.00169286	13258.9	0.14307
13245.7	0.000670837	13245.7	0.05588	13245.7	-0.000481119	13245.7	0.1272	13245.7	0.00182712	13245.7	0.15185	13245.7	-0.000150932	13245.7	-0.00100162	13245.7	1.03525	13245.7	0.3816	13245.7	0.0061	13245.7	-0.00197143	13245.7	0.1406
13232.6	0.00108	13232.6	0.05658	13232.6	-3.87725e-05	13232.6	0.1305	13232.6	0.00268827	13232.6	0.14965	13232.6	0.000235839	13232.6	-0.000364354	13232.6	1.0344	13232.6	0.3897	13232.6	0.0062	13232.6	-0.00045	13232.6	0.14563
13219.5	0.00149	13219.5	0.05678	13219.5	-9.64259e-05	13219.5	0.126	13219.5	0.00284951	13219.5	0.14756	13219.5	2.24381e-05	13219.5	5.74787e-05	13219.5	1.0336	13219.5	0.3976	13219.5	0.0069	13219.5	-2.85714e-05	13219.5	0.15206
13206.4	0.000697	13206.4	0.05598	13206.4	4.59206e-05	13206.4	0.1245	13206.4	0.00231082	13206.4	0.14497	13206.4	8.86564e-06	13206.4	0.000100596	13206.4	1.03284	13206.4	0.4054	13206.4	0.007	13206.4	-0.00170714	13206.4	0.15749
13193.3	0.000705686	13193.3	0.05568	13193.3	-0.000311733	13193.3	0.131	13193.3	0.000972207	13193.3	0.14357	13193.3	0.000395122	13193.3	0.00203654	13193.3	1.03212	13193.3	0.4125	13193.3	0.0075	13193.3	-0.00198571	13193.3	0.16372
13180.3	-0.000185645	13180.3	0.05478	13180.3	-0.000969386	13180.3	0.1372	13180.3	0.00083367	13180.3	0.14158	13180.3	0.000281208	13180.3	0.00270935	13180.3	1.03144	13180.3	0.4195	13180.3	0.007	13180.3	0.00203571	13180.3	0.15885
13167.3	0.000623007	13167.3	0.05318	13167.3	-0.00032704	13167.3	0.1321	13167.3	0.00129521	13167.3	0.13989	13167.3	0.00116712	13167.3	0.00266816	13167.3	1.03079	13167.3	0.4279	13167.3	0.0072	13167.3	-0.000742857	13167.3	0.15339
13154.3	0.000531642	13154.3	0.05178	13154.3	0.000115307	13154.3	0.1196	13154.3	0.00105683	13154.3	0.13809	13154.3	0.00145287	13154.3	0.00257471	13154.3	1.03017	13154.3	0.4359	13154.3	0.0076	13154.3	-0.000921429	13154.3	0.14632
13141.3	0.00064026	13141.3	0.05198	13141.3	0.000457653	13141.3	0.1063	13141.3	0.00231852	13141.3	0.1362	13141.3	0.00103845	13141.3	0.00345908	13141.3	1.02953	13141.3	0.446	13141.3	0.0074	13141.3	0	13141.3	0.13836
13128.4	0.000448861	13128.4	0.05298	13128.4	0	13128.4	0.0987	13128.4	0.00238028	13128.4	0.13381	13128.4	0.000823857	13128.4	0.00434259	13128.4	1.02881	13128.4	0.4556	13128.4	0.0078	13128.4	0.000542283	13128.4	0.1259
13115.4	0.000557445	13115.4	0.05399	13115.4	0.000785523	13115.4	0.0964	13115.4	0.00184212	13115.4	0.13221	13115.4	0.000709098	13115.4	0.00528855	13115.4	1.02798	13115.4	0.4673	13115.4	0.0083	13115.4	0.000384565	13115.4	0.12113
13102.6	0.000466012	13102.6	0.05339	13102.6	0.00117105	13102.6	0.0942	13102.6	0.00310404	13102.6	0.13032	13102.6	0.000394171	13102.6	0.0044857	13102.6	1.02707	13102.6	0.4798	13102.6	0.0104	13102.6	0.000226848	13102.6	0.11897
13089.9	0.000374449	13089.9	0.05219	13089.9	5.54289e-05	13089.9	0.0901	13089.9	0.00266654	13089.9	0.12913	13089.9	-0.000822054	13089.9	0.00282034	13089.9	1.02611	13089.9	0.491	13089.9	0.0138	13089.9	-0.00282077	13089.9	0.12012
13077	0.000382983	13077	0.05089	13077	-0.000359048	13077	0.0862	13077	0.0022286	13077	0.12783	13077	-0.00163731	13077	0.00206047	13077	1.02511	13077	0.5025	13077	0.0149	13077	-0.00497848	13077	0.12276
13064.2	0.0004915	13064.2	0.05079	13064.2	-0.00127353	13064.2	0.0836	13064.2	0.00239074	13064.2	0.12644	13064.2	-0.00115274	13064.2	0.000652095	13064.2	1.02407	13064.2	0.5111	13064.2	0.0138	13064.2	0.000763798	13064.2	0.12471
13051.4	0	13051.4	0.05159	13051.4	-0.001688	13051.4	0.0812	13051.4	0.00165296	13051.4	0.12345	13051.4	-0.000268326	13051.4	0.000933275	13051.4	1.02297	13051.4	0.5177	13051.4	0.0107	13051.4	0.00170608	13051.4	0.12515
13038.7	0.000246477	13038.7	0.05129	13038.7	-0.00100248	13038.7	0.08	13038.7	0.00181525	13038.7	0.12105	13038.7	0.000315919	13038.7	0.00239401	13038.7	1.02179	13038.7	0.524	13038.7	0.009	13038.7	0.00244836	13038.7	0.12559
13025.9	0.000293059	13025.9	0.04829	13025.9	-0.00151696	13025.9	0.0801	13025.9	0.00167761	13025.9	0.11916	13025.9	0	13025.9	0.00211469	13025.9	1.0205	13025.9	0.5311	13025.9	0.0075	13025.9	0.00389065	13025.9	0.12424
13013.2	-6.02555e-05	13013.2	0.04789	13013.2	-0.00143143	13013.2	0.0797	13013.2	0.00194004	13013.2	0.11797	13013.2	-0.00033999	13013.2	0.00207739	13013.2	1.01906	13013.2	0.5359	13013.2	0.0077	13013.2	0.00463293	13013.2	0.12289
13000.5	0.000486534	13000.5	0.04949	13000.5	-0.00114591	13000.5	0.079	13000.5	0.00220255	13000.5	0.11507	13000.5	0.0013201	13000.5	0.0020944	13000.5	1.01748	13000.5	0.5387	13000.5	0.0092	13000.5	0.00407521	13000.5	0.11974
12988	0.000434135	12988	0.05019	12988	-0.000561527	12988	0.0762	12988	0.00186563	12988	0.11338	12988	0.000780794	12988	0.00227419	12988	1.01579	12988	0.5387	12988	0.0094	12988	0.0062276	12988	0.11969
12975.4	-0.000518869	12975.4	0.05029	12975.4	-0.000276004	12975.4	0.074	12975.4	0.00132828	12975.4	0.11169	12975.4	0.00114104	12975.4	0.00179694	12975.4	1.01395	12975.4	0.5446	12975.4	0.0095	12975.4	0.00446988	12975.4	0.12184
12962.8	0.000428229	12962.8	0.04979	12962.8	-0.00139048	12962.8	0.0726	12962.8	0.00179101	12962.8	0.10949	12962.8	0.000601355	12962.8	0.00142394	12962.8	1.01204	12962.8	0.5481	12962.8	0.0095	12962.8	0.00531216	12962.8	0.12439
12950.2	0.00067543	12950.2	0.04989	12950.2	-0.00110496	12950.2	0.0715	12950.2	0.0030538	12950.2	0.1084	12950.2	0.00116175	12950.2	0.000628562	12950.2	1.01009	12950.2	0.551	12950.2	0.0102	12950.2	0.00565444	12950.2	0.12535
12937.6	0.000522734	12937.6	0.05029	12937.6	-0.000519435	12937.6	0.0712	12937.6	0.00271667	12937.6	0.10661	12937.6	0.00122222	12937.6	0.000580373	12937.6	1.00813	12937.6	0.5539	12937.6	0.0095	12937.6	0.00319673	12937.6	0.1276
12925.2	7.08408e-05	12925.2	0.04899	12925.2	-0.000935052	12925.2	0.0701	12925.2	0.00228011	12925.2	0.10521	12925.2	-0.0004167	12925.2	0.000162048	12925.2	1.00619	12925.2	0.5547	12925.2	0.0099	12925.2	0.00344911	12925.2	0.13066
12912.7	-0.000181653	12912.7	0.04819	12912.7	0.000150471	12912.7	0.07	12912.7	0.00294312	12912.7	0.10302	12912.7	-0.000156074	12912.7	-0.000553365	12912.7	1.0042	12912.7	0.5569	12912.7	0.0098	12912.7	0.00479139	12912.7	0.13662
12900.2	6.59552e-05	12900.2	0.0476	12900.2	-0.000764006	12900.2	0.0693	12900.2	0.00320621	12900.2	0.10093	12900.2	0.000204627	12900.2	-0.000446215	12900.2	1.00216	12900.2	0.561	12900.2	0.0097	12900.2	0.00563368	12900.2	0.14277
12887.8	-8.63355e-05	12887.8	0.0487	12887.8	-0.000178483	12887.8	0.0706	12887.8	0.00286936	12887.8	0.09963	12887.8	0.000965405	12887.8	0.00108027	12887.8	1.00007	12887.8	0.5661	12887.8	0.0109	12887.8	0.00607596	12887.8	0.14733
12875.3	0.000361475	12875.3	0.0487	12875.3	-0.00119296	12875.3	0.0689	12875.3	0.00293259	12875.3	0.09674	12875.3	0.000626258	12875.3	0.00043122	12875.3	0.997931	12875.3	0.5712	12875.3	0.0111	12875.3	0.00841824	12875.3	0.15449
12863.1	0.00041008	12863.1	0.0464	12863.1	0.000391423	12863.1	0.0683	12863.1	0.00289638	12863.1	0.09664	12863.1	0.000987707	12863.1	-1.78668e-05	12863.1	0.995791	12863.1	0.5772	12863.1	0.0119	12863.1	0.00817063	12863.1	0.15236
12850.7	5.80897e-05	12850.7	0.0449	12850.7	7.6946e-05	12850.7	0.0685	12850.7	0.00235975	12850.7	0.09495	12850.7	0.00094871	12850.7	0.000604638	12850.7	0.9936	12850.7	0.585	12850.7	0.0124	12850.7	0.00721291	12850.7	0.14732
12838.3	0.0003062	12838.3	0.0461	12838.3	0.000762469	12838.3	0.0681	12838.3	0.00242318	12838.3	0.09316	12838.3	0.000309788	12838.3	-0.000286771	12838.3	0.991423	12838.3	0.5933	12838.3	0.0132	12838.3	0.00335519	12838.3	0.14288
12826.1	0.00116	12826.1	0.0475	12826.1	0.00104685	12826.1	0.0685	12826.1	0.00128718	12826.1	0.09046	12826.1	0.000171459	12826.1	2.92153e-05	12826.1	0.989317	12826.1	0.5994	12826.1	0.0143	12826.1	0.00220758	12826.1	0.13675
12813.8	0.000403408	12813.8	0.0485	12813.8	0.000332375	12813.8	0.0681	12813.8	0.000450756	12813.8	0.08947	12813.8	0.000132686	12813.8	-0.000242684	12813.8	0.987221	12813.8	0.6071	12813.8	0.0154	12813.8	0.00224986	12813.8	0.13312
12801.5	0.000351815	12801.5	0.0474	12801.5	0.000517898	12801.5	0.0681	12801.5	0.000914403	12801.5	0.08798	12801.5	0.000793987	12801.5	-0.000553794	12801.5	0.985139	12801.5	0.6158	12801.5	0.0181	12801.5	0.00329214	12801.5	0.12898
12789.2	0.000400322	12789.2	0.0466	12789.2	-0.000496579	12789.2	0.0681	12789.2	0.00107812	12789.2	0.08708	12789.2	0.000155362	12789.2	-3.98104e-05	12789.2	0.983048	12789.2	0.6199	12789.2	0.02	12789.2	0.00193442	12789.2	0.12665
12777.1	0.000649612	12777.1	0.0467	12777.1	-1.21963e-05	12777.1	0.069	12777.1	0.00134239	12777.1	0.08559	12777.1	0.00111733	12777.1	-0.000256784	12777.1	0.980967	12777.1	0.6281	12777.1	0.0201	12777.1	0.00448681	12777.1	0.12882
12764.9	0.000398314	12764.9	0.0467	12764.9	-0.000726673	12764.9	0.0683	12764.9	0.000706246	12764.9	0.08369	12764.9	0.000678848	12764.9	-0.000689982	12764.9	0.978838	12764.9	0.6359	12764.9	0.0234	12764.9	0.00542909	12764.9	0.13379
12752.7	0.000447114	12752.7	0.0457	12752.7	-0.00084115	12752.7	0.0686	12752.7	0.00037017	12752.7	0.0818	12752.7	0.000540443	12752.7	-0.000387382	12752.7	0.976684	12752.7	0.6414	12752.7	0.0254	12752.7	0.000171375	12752.7	0.14026
12740.6	-0.000503307	12740.6	0.0455	12740.6	-0.000156767	12740.6	0.0678	12740.6	0.000834644	12740.6	0.08041	12740.6	0.00220262	12740.6	0.00116538	12740.6	0.974516	12740.6	0.6461	12740.6	0.0278	12740.6	0.000723761	12740.6	0.14873
12728.5	0.000245688	12728.5	0.0451	12728.5	-0.000171244	12728.5	0.0678	12728.5	0.000798705	12728.5	0.07901	12728.5	0.000864365	12728.5	0.000918231	12728.5	0.972252	12728.5	0.6486	12728.5	0.03	12728.5	0.00126604	12728.5	0.15851
12716.3	0.000894779	12716.3	0.0448	12716.3	-0.000285721	12716.3	0.0678	12716.3	0.00146283	12716.3	0.07692	12716.3	2.61793e-05	12716.3	0.000277266	12716.3	0.969902	12716.3	0.6497	12716.3	0.034	12716.3	0.00180833	12716.3	0.16468
12704.4	0.00104	12704.4	0.0443	12704.4	-1.33862e-06	12704.4	0.0685	12704.4	0.00182751	12704.4	0.07623	12704.4	0.000788574	12704.4	0.000593163	12704.4	0.967499	12704.4	0.6475	12704.4	0.0398	12704.4	0.00206071	12704.4	0.16416
12692.3	0.000493929	12692.3	0.04451	12692.3	-0.000315816	12692.3	0.0682	12692.3	0.000891775	12692.3	0.07483	12692.3	0.000350533	12692.3	-0.000489411	12692.3	0.964979	12692.3	0.6401	12692.3	0.0454	12692.3	0.00290299	12692.3	0.15633
12680.2	0.00064331	12680.2	0.04351	12680.2	0.000169707	12680.2	0.0676	12680.2	0.000756109	12680.2	0.07394	12680.2	-0.000687436	12680.2	-0.000630653	12680.2	0.962366	12680.2	0.6322	12680.2	0.0544	12680.2	0.00274528	12680.2	0.14541
12668.3	0.00019346	12668.3	0.04251	12668.3	-0.00104591	12668.3	0.0672	12668.3	0.000320984	12668.3	0.07214	12668.3	-0.000824828	12668.3	-0.000472055	12668.3	0.959679	12668.3	0.6204	12668.3	0.0633	12668.3	0.00229766	12668.3	0.13239
12656.3	0.000243031	12656.3	0.04081	12656.3	-0.00116039	12656.3	0.0679	12656.3	8.54522e-05	12656.3	0.07055	12656.3	-0.000762653	12656.3	-9.92789e-05	12656.3	0.956828	12656.3	0.6088	12656.3	0.0719	12656.3	0.00183994	12656.3	0.11167
12644.5	9.33691e-05	12644.5	0.04121	12644.5	-0.000276004	12644.5	0.0681	12644.5	0.00025046	12644.5	0.06936	12644.5	0.000200096	12644.5	0.000730004	12644.5	0.953899	12644.5	0.594	12644.5	0.0811	12644.5	0.00279233	12644.5	0.08955
12632.5	-0.00015687	12632.5	0.04241	12632.5	0.000209519	12632.5	0.0698	12632.5	1.50616e-05	12632.5	0.06756	12632.5	-3.75877e-05	12632.5	8.91962e-05	12632.5	0.950857	12632.5	0.5767	12632.5	0.092	12632.5	0.00363461	12632.5	0.07083
12620.5	-0.000107013	12620.5	0.04341	12620.5	9.50421e-05	12620.5	0.0716	12620.5	0.00027973	12620.5	0.06507	12620.5	0.0005248	12620.5	0.0013483	12620.5	0.947803	12620.5	0.5573	12620.5	0.105	12620.5	0.00847689	12620.5	0.05691
12608.8	0.000643605	12608.8	0.04141	12608.8	0.000479425	12608.8	0.0703	12608.8	4.49354e-05	12608.8	0.06438	12608.8	0.00138776	12608.8	0.00129645	12608.8	0.944837	12608.8	0.5384	12608.8	0.1219	12608.8	0.00622928	12608.8	0.0487
12596.8	-0.000106351	12596.8	0.04211	12596.8	0.000564948	12596.8	0.0715	12596.8	0.000309737	12596.8	0.06288	12596.8	0.000850289	12596.8	0.000770846	12596.8	0.941921	12596.8	0.5215	12596.8	0.1426	12596.8	0.00447156	12596.8	0.04208
12585.1	-0.000455548	12585.1	0.04441	12585.1	0.000749331	12585.1	0.0712	12585.1	-0.000524928	12585.1	0.06189	12585.1	0.00111339	12585.1	0.00143302	12585.1	0.939152	12585.1	0.5069	12585.1	0.1681	12585.1	0.00382395	12585.1	0.03327
12573.2	-0.000105316	12573.2	0.04281	12573.2	0.000934854	12573.2	0.0717	12573.2	0.000240005	12573.2	0.06019	12573.2	0.00127606	12573.2	0.00192551	12573.2	0.936453	12573.2	0.4932	12573.2	0.2	12573.2	0.00426623	12573.2	0.02765
12561.4	0.000445009	12561.4	0.03981	12561.4	0.000520377	12561.4	0.0729	12561.4	0.000305004	12561.4	0.0592	12561.4	0.000138796	12561.4	0.00182712	12561.4	0.933852	12561.4	0.4837	12561.4	0.2345	12561.4	0.00340851	12561.4	0.02234
12549.7	0.000396088	12549.7	0.03871	12549.7	-9.52405e-05	12549.7	0.0723	12549.7	-2.94653e-05	12549.7	0.05851	12549.7	0.000302101	12549.7	0.00108799	12549.7	0.931388	12549.7	0.477	12549.7	0.2668	12549.7	0.000160898	12549.7	0.01693
12537.9	0.000246599	12537.9	0.03841	12537.9	9.02826e-05	12537.9	0.0729	12537.9	0.000535665	12537.9	0.05771	12537.9	-0.00023502	12537.9	0.00165946	12537.9	0.929019	12537.9	0.4691	12537.9	0.2922	12537.9	0.00180318	12537.9	0.01362
12526.3	-0.000102139	12526.3	0.03801	12526.3	-0.000125335	12526.3	0.0732	12526.3	-9.86765e-05	12526.3	0.05692	12526.3	0.000428422	12526.3	0.000713567	12526.3	0.92683	12526.3	0.4658	12526.3	0.3138	12526.3	0.00265557	12526.3	0.01101
12514.5	0.000648557	12514.5	0.03631	12514.5	-0.000939812	12514.5	0.0743	12514.5	0.000166583	12514.5	0.05492	12514.5	9.14396e-05	12514.5	0.00128891	12514.5	0.924758	12514.5	0.4628	12514.5	0.3324	12514.5	0.000397848	12514.5	0.0098
12503	0	12503	0.03662	12503	-0.00105543	12503	0.0763	12503	0.00053237	12503	0.05333	12503	0.000355018	12503	0.00125862	12503	0.922816	12503	0.4611	12503	0.3491	12503	0.00275023	12503	0.0082
12491.3	-0.000172346	12491.3	0.03792	12491.3	-0.000369906	12491.3	0.0814	12491.3	0.000697759	12491.3	0.05234	12491.3	-0.000581827	12491.3	-3.64201e-06	12491.3	0.920879	12491.3	0.4622	12491.3	0.3617	12491.3	0.00569252	12491.3	0.00869
12479.7	-0.000343594	12479.7	0.03882	12479.7	-8.55231e-05	12479.7	0.0842	12479.7	6.36732e-05	12479.7	0.05034	12479.7	-0.000718113	12479.7	0.000529323	12479.7	0.918934	12479.7	0.4622	12479.7	0.3693	12479.7	0.0061449	12479.7	0.00749
12468.1	0.000184329	12468.1	0.03772	12468.1	0	12468.1	0.0851	12468.1	0.000529191	12468.1	0.04985	12468.1	-5.48216e-05	12468.1	0.0011403	12468.1	0.916902	12468.1	0.4642	12468.1	0.3736	12468.1	0.00118718	12468.1	0.00648
12456.6	-0.000286656	12456.6	0.03742	12456.6	0.000396309	12456.6	0.0834	12456.6	9.52313e-05	12456.6	0.04865	12456.6	-0.000990973	12456.6	0.000163756	12456.6	0.914847	12456.6	0.4662	12456.6	0.3768	12456.6	0.00333957	12456.6	0.00508
12444.9	-0.000158466	12444.9	0.03652	12444.9	0.000292569	12444.9	0.085	12444.9	0.000160877	12444.9	0.04696	12444.9	-0.000127545	12444.9	0.000228443	12444.9	0.912718	12444.9	0.4674	12444.9	0.3821	12444.9	0.00488185	12444.9	0.00568
12433.5	-0.000629187	12433.5	0.03662	12433.5	8.88778e-05	12433.5	0.0883	12433.5	-0.000572957	12433.5	0.04587	12433.5	0.000336437	12433.5	0.000272255	12433.5	0.910573	12433.5	0.4688	12433.5	0.3933	12433.5	0.00713424	12433.5	0.00718
12421.9	0.000399269	12421.9	0.03632	12421.9	-0.000714863	12421.9	0.0919	12421.9	-0.000607185	12421.9	0.04527	12421.9	0	12421.9	0.000354051	12421.9	0.908339	12421.9	0.4706	12421.9	0.41	12421.9	0.00527652	12421.9	0.00257
12410.5	-0.000871191	12410.5	0.03682	12410.5	-0.000618554	12410.5	0.0941	12410.5	0.00185911	12410.5	0.04318	12410.5	-0.00022588	12410.5	0.000954851	12410.5	0.906052	12410.5	0.4703	12410.5	0.4308	12410.5	0.00572891	12410.5	0.00158
12399.1	-0.000241521	12399.1	0.03702	12399.1	-0.000222244	12399.1	0.0921	12399.1	-0.00057454	12399.1	0.04318	12399.1	-5.17125e-05	12399.1	0.00110336	12399.1	0.903666	12399.1	0.4688	12399.1	0.4521	12399.1	0.00148129	12399.1	0.00478
12387.6	0.000187329	12387.6	0.03702	12387.6	-0.000625985	12387.6	0.0925	12387.6	-0.000208579	12387.6	0.04269	12387.6	-0.00127785	12387.6	0.00285287	12387.6	0.901159	12387.6	0.4674	12387.6	0.468	12387.6	0.00342357	12387.6	0.00608
12376.2	-0.000282742	12376.2	0.03692	12376.2	-0.000529676	12376.2	0.0952	12376.2	-0.000742101	12376.2	0.0406	12376.2	-0.000303583	12376.2	0.00204286	12376.2	0.898616	12376.2	0.4639	12376.2	0.4783	12376.2	0.00497596	12376.2	0.00559
12364.8	-0.000453629	12364.8	0.03562	12364.8	-0.00133342	12364.8	0.1019	12364.8	-0.00137601	12364.8	0.0402	12364.8	0.00037038	12364.8	0.00419428	12364.8	0.895986	12364.8	0.4639	12364.8	0.486	12364.8	0.00641824	12364.8	0.00399
12353.5	-0.000823443	12353.5	0.03472	12353.5	-0.000837107	12353.5	0.1094	12353.5	-0.000909414	12353.5	0.03941	12353.5	0.000144737	12353.5	0.00482819	12353.5	0.89337	12353.5	0.4635	12353.5	0.4953	12353.5	0.00927063	12353.5	0.0027
12342	-0.000794069	12342	0.03612	12342	-0.000840848	12342	0.1148	12342	-0.0010432	12342	0.03871	12342	-0.000781204	12342	0.00697085	12342	0.890743	12342	0.4635	12342	0.5068	12342	0.00911291	12342	0
12330.8	-0.000363626	12330.8	0.03612	12330.8	-0.00224454	12330.8	0.1231	12330.8	-0.000976479	12330.8	0.03752	12330.8	-0.00140675	12330.8	0.0103845	12330.8	0.888252	12330.8	0.4651	12330.8	0.5185	12330.8	0.0104653	12330.8	-0.00111
12319.5	-0.000133057	12319.5	0.03582	12319.5	-0.00144823	12319.5	0.1323	12319.5	-0.000709695	12319.5	0.03613	12319.5	-0.000932254	12319.5	0.0147022	12319.5	0.885905	12319.5	0.4667	12319.5	0.5305	12319.5	0.00871768	12319.5	0.00077323
12308.1	-0.000103296	12308.1	0.03583	12308.1	-0.00075197	12308.1	0.1402	12308.1	0.000356702	12308.1	0.03513	12308.1	-0.000258053	12308.1	0.0181581	12308.1	0.883653	12308.1	0.4671	12308.1	0.5414	12308.1	0.00535996	12308.1	0.000660774
12296.9	-0.000772472	12296.9	0.03613	12296.9	-0.000955661	12296.9	0.1467	12296.9	2.36071e-05	12296.9	0.03434	12296.9	-0.00118346	12296.9	0.0187678	12296.9	0.88154	12296.9	0.4649	12296.9	0.5519	12296.9	0.00481235	12296.9	-0.000553007
12285.8	-0.000741522	12285.8	0.03473	12285.8	-0.000859352	12285.8	0.1499	12285.8	0.000690573	12285.8	0.03354	12285.8	-0.000108824	12285.8	0.0164848	12285.8	0.879526	12285.8	0.4597	12285.8	0.5611	12285.8	0.00606473	12285.8	-0.00227
12274.5	-0.000311377	12274.5	0.03283	12274.5	3.69077e-05	12274.5	0.139	12274.5	-4.28465e-05	12274.5	0.03215	12274.5	-0.000734482	12274.5	0.014052	12274.5	0.877581	12274.5	0.4514	12274.5	0.5719	12274.5	0.00710702	12274.5	-0.00168
12263.3	-0.000180175	12263.3	0.03163	12263.3	-0.00126678	12263.3	0.1221	12263.3	-7.57601e-05	12263.3	0.03065	12263.3	-0.000759751	12263.3	0.0109158	12263.3	0.875754	12263.3	0.4423	12263.3	0.5826	12263.3	0.0060594	12263.3	0.000205869
12252.2	-0.000448848	12252.2	0.03063	12252.2	-0.00197047	12252.2	0.1115	12252.2	0.000191386	12252.2	0.02986	12252.2	-0.000784975	12252.2	0.009192	12252.2	0.874017	12252.2	0.4316	12252.2	0.5915	12252.2	0.00401179	12252.2	0.00129
12241	-0.000518322	12241	0.03033	12241	-0.00217421	12241	0.109	12241	0.000758149	12241	0.02907	12241	0.000189507	12241	0.00856181	12241	0.872351	12241	0.4222	12241	0.5944	12241	0.00295407	12241	0.000278052
12229.9	-0.000286745	12229.9	0.03023	12229.9	-0.00127791	12229.9	0.1082	12229.9	0.00102541	12229.9	0.02897	12229.9	0.000264375	12229.9	0.00902487	12229.9	0.870798	12229.9	0.4129	12229.9	0.5928	12229.9	0.000706455	12229.9	-3.66675e-05
12218.8	-5.50445e-05	12218.8	0.03053	12218.8	-0.0011816	12218.8	0.108	12218.8	0.00099274	12218.8	0.02798	12218.8	-0.000160711	12218.8	0.00856257	12218.8	0.869343	12218.8	0.4056	12218.8	0.5878	12218.8	0.00075884	12218.8	0.000648459
12207.6	-2.41407e-05	12207.6	0.03123	12207.6	-0.000985337	12207.6	0.1033	12207.6	0.000459683	12207.6	0.02718	12207.6	-0.000786091	12207.6	0.00796932	12207.6	0.867927	12207.6	0.3999	12207.6	0.5842	12207.6	0.00470112	12207.6	0.00193
12196.6	0.000107808	12196.6	0.03103	12196.6	0.000110973	12196.6	0.0993	12196.6	-0.000272873	12196.6	0.02709	12196.6	-0.000611086	12196.6	0.00868121	12196.6	0.866478	12196.6	0.3935	12196.6	0.5847	12196.6	0.00365351	12196.6	0.00402
12185.6	-0.00036012	12185.6	0.03063	12185.6	0.000407282	12185.6	0.096	12185.6	-5.37054e-06	12185.6	0.02599	12185.6	-0.00133604	12185.6	0.00637403	12185.6	0.865081	12185.6	0.3905	12185.6	0.5927	12185.6	0.00220589	12185.6	0.0059
12174.5	-0.000428842	12174.5	0.03043	12174.5	-0.00109646	12174.5	0.0932	12174.5	0.000161752	12174.5	0.026	12174.5	-0.00166128	12174.5	0.00524692	11948	0.856638	12174.5	0.3878	12174.5	0.6139	12174.5	0.000248176	12174.5	0.00749
12163.5	-0.0012	12163.5	0.02573	12163.5	-0.00360015	12163.5	0.0906	12163.5	-7.06274e-05	12163.5	0.02671	12163.5	-0.00278614	12163.5	0.0034929	11937.3	0.854939	12163.5	0.387	12163.5	0.6472	12163.5	-0.00369944	12163.5	0.01127
12152.6	-0.00216	12152.6	0.02183	12152.6	-0.00640384	12152.6	0.0885	12152.6	0.000397051	12152.6	0.02791	12152.6	-0.00451095	12152.6	0.000713257	11926.8	0.853205	12152.6	0.3863	12152.6	0.6792	12152.6	-0.00824705	12152.6	0.01226
12141.7	-0.00213	12141.7	0.02063	12141.7	-0.00770753	12141.7	0.0887	12141.7	0.000764787	12141.7	0.02792	12141.7	-0.00503572	12141.7	0.00079669	11916.3	0.851224	12141.7	0.3838	12141.7	0.7033	12141.7	-0.00719467	12141.7	0.01434
12130.6	-0.0018	12130.6	0.02463	12130.6	-0.00611127	12130.6	0.0896	12130.6	0.000232147	12130.6	0.02672	12130.6	-0.00516078	12130.6	0.000907453	11905.8	0.849005	12130.6	0.3849	12130.6	0.7239	12130.6	-0.00305239	12130.6	0.01453
12119.7	-0.00147	12119.7	0.02764	12119.7	-0.00491496	12119.7	0.0887	12119.7	0	12119.7	0.02503	12119.7	-0.00378546	12119.7	0.00109802	11895.3	0.846697	12119.7	0.389	12119.7	0.7392	12119.7	0	12119.7	0.01471
12108.9	-0.00103	12108.9	0.02844	12108.9	-0.00391865	12108.9	0.0854	12108.9	0.000840912	12108.9	0.02353	12108.9	-0.0023101	12108.9	0.00182241	11884.8	0.844321	12108.9	0.3917	12108.9	0.7438	12108.9	0.00209523	12108.9	0.01989
12098	-0.000400976	12098	0.02744	12098	-0.00372234	12098	0.0809	12098	0.00168193	12098	0.02254	12098	-0.00213469	12098	0.000903154	11874.4	0.841876	12098	0.3955	12098	0.734	12098	0.00429046	12098	0.02278
12087.2	-0.000667812	12087.2	0.02664	12087.2	-0.00292603	12087.2	0.0771	12087.2	0.000523054	12087.2	0.02205	12087.2	-0.00285924	12087.2	-0.000355638	11863.9	0.839363	12087.2	0.4008	12087.2	0.7045	12087.2	0.000885695	12087.2	0.02696
12076.3	-0.000835428	12076.3	0.02654	12076.3	-0.00222978	12076.3	0.0749	12076.3	0.00016349	12076.3	0.02155	12076.3	-0.00348408	12076.3	-0.000418757	11853.5	0.836781	12076.3	0.4037	12076.3	0.6654	12076.3	0.000761943	12076.3	0.02945
12065.5	-0.000902023	12065.5	0.02474	12065.5	-0.00193347	12065.5	0.0746	12065.5	4.82521e-06	12065.5	0.02086	12065.5	-0.00320854	12065.5	-0.000362899	11843.1	0.834125	12065.5	0.406	12065.5	0.626	12065.5	0.000957175	12065.5	0.03323
12054.7	-0.0004685	12054.7	0.02534	12054.7	-0.00163716	12054.7	0.0752	12054.7	4.62652e-05	12054.7	0.01976	12054.7	-0.00223296	12054.7	0.00038811	11832.8	0.831391	12054.7	0.4074	12054.7	0.5874	12054.7	-0.00114759	12054.7	0.03741
12044	-0.000634858	12044	0.02634	12044	-0.00154085	12044	0.0746	12044	-0.00031219	12044	0.01857	12044	-0.00125733	12044	0.000170522	11822.4	0.828575	12044	0.4092	12044	0.5628	12044	-0.00205236	12044	0.04289
12033.3	-0.000701097	12033.3	0.02594	12033.3	-0.00104454	12033.3	0.0741	12033.3	-7.05419e-05	12033.3	0.01717	12033.3	-0.00148166	12033.3	0.000573373	11812.1	0.82567	12033.3	0.4091	12033.3	0.555	12033.3	0.00034287	12033.3	0.05008
12022.4	-0.000268112	12022.4	0.02514	12022.4	-0.00104828	12022.4	0.0741	12022.4	0.000170424	12022.4	0.01678	12022.4	-0.00170627	12022.4	-0.000402914	11801.8	0.822676	12022.4	0.4103	12022.4	0.562	12022.4	0.00141912	12022.4	0.05916
12011.7	-0.000234115	12011.7	0.02534	12011.7	-0.00055197	12011.7	0.0741	12011.7	0.000412281	12011.7	0.01628	12011.7	-0.00133052	12011.7	-0.000663879	11791.5	0.819634	12011.7	0.4091	12011.7	0.5602	12011.7	-0.00158565	12011.7	0.06694
12001.1	0	12001.1	0.02444	12001.1	-0.000755661	12001.1	0.0737	12001.1	0.000254242	12001.1	0.01669	12001.1	-0.00225472	12001.1	-0.000588162	11781.2	0.816505	12001.1	0.4098	12001.1	0.5366	12001.1	-0.00729042	12001.1	0.07942
11990.4	-0.000360068	11990.4	0.02234	11990.4	-0.00105935	11990.4	0.0727	11990.4	9.63053e-05	11990.4	0.0166	11990.4	-0.00237887	11990.4	-0.000842284	11770.9	0.813396	11990.4	0.4102	11990.4	0.4954	11990.4	-0.0118952	11990.4	0.08981
11979.8	-0.00012003	11979.8	0.02114	11979.8	-0.00126304	11979.8	0.0735	11979.8	0.00143847	11979.8	0.0165	11979.8	-0.00370299	11979.8	-0.0015706	11760.7	0.810345	11979.8	0.4106	11979.8	0.4447	11979.8	-0.0104	11979.8	0.09549
11969.2	-0.000379885	11969.2	0.02254	11969.2	-0.00106673	11969.2	0.075	11969.2	0.00148074	11969.2	0.01631	11969.2	-0.00372706	11969.2	-0.00160383	11750.5	0.80734	11969.2	0.412	11969.2	0.3883	11969.2	-0.00410472	11969.2	0.10307
11958.6	-0.000639635	11958.6	0.02284	11958.6	-0.00117042	11958.6	0.0764	11958.6	0.000623111	11958.6	0.01481	11958.6	-0.00285109	11958.6	-0.00112504	11740.3	0.80434	11958.6	0.4133	11958.6	0.3254	11958.6	-0.00230949	11958.6	0.11075
11948	-0.000199279	11948	0.02454	11948	-0.00167411	11948	0.0775	11948	0.000865584	11948	0.01302	11948	-0.00197507	11948	-0.000617856	11730.1	0.8013	11948	0.4155	11948	0.2663	11948	-0.00151426	11948	0.11643
11937.3	-0.00106	11937.3	0.02385	11937.3	-0.00167786	11937.3	0.0767	11937.3	0.000107383	11937.3	0.01212	11937.3	-0.00129934	11937.3	-0.000513396	11719.9	0.798198	11937.3	0.4195	11937.3	0.2152	11937.3	0.000461988	11937.3	0.12072
11926.8	-0.000919053	11926.8	0.02525	11926.8	-0.00138155	11926.8	0.0751	11926.8	-4.99399e-05	11926.8	0.01233	11926.8	-0.000523241	11926.8	0	11709.7	0.79505	11926.8	0.4233	11926.8	0.1754	11926.8	5.722e-05	11926.8	0.1237
11916.3	-0.00067838	11916.3	0.02455	11916.3	-0.000985237	11916.3	0.0739	11916.3	0.000692838	11916.3	0.01073	11916.3	-0.0008471	11916.3	-0.00102793	11699.6	0.791879	11916.3	0.4301	11916.3	0.1449	11916.3	0.000552452	11916.3	0.12518
11905.8	-0.000637603	11905.8	0.02435	11905.8	-0.00128893	11905.8	0.0712	11905.8	0.000535717	11905.8	0.01224	11905.8	-0.00107092	11905.8	-0.000826638	11689.6	0.78876	11905.8	0.4381	11905.8	0.1225	11905.8	-0.000152317	11905.8	0.12266
11895.3	-0.000596721	11895.3	0.02345	11895.3	-0.000492618	11895.3	0.0696	11895.3	0.000478697	11895.3	0.01214	11895.3	-0.00259469	11895.3	-0.00122874	11679.5	0.785644	11895.3	0.4464	11895.3	0.1082	11895.3	-0.00625709	11895.3	0.12164
11884.8	-0.000955735	11884.8	0.02405	11884.8	-0.00109631	11884.8	0.0689	11884.8	2.1777e-05	11884.8	0.01185	11884.8	-0.00271843	11884.8	-0.000706638	11669.4	0.782607	11884.8	0.4528	11884.8	0.0979	11884.8	-0.00966185	11884.8	0.11672
11874.4	-0.000814646	11874.4	0.02535	11874.4	0	11874.4	0.0695	11874.4	0.000764957	11874.4	0.01046	11874.4	-0.00214212	11874.4	-0.000350433	11659.4	0.779665	11874.4	0.4566	11874.4	0.0863	11874.4	-0.00626662	11874.4	0.1102
11863.9	-0.000573453	11863.9	0.02445	11863.9	0.000703512	11863.9	0.0701	11863.9	0.000408237	11863.9	0.01006	11863.9	-0.00156577	11863.9	0.000101094	11649.3	0.776807	11863.9	0.463	11863.9	0.0751	11863.9	-0.00387139	11863.9	0.10198
11853.5	6.78428e-05	11853.5	0.02315	11853.5	0.000707023	11853.5	0.07	11853.5	0.000151616	11853.5	0.00987	11853.5	-0.00128937	11853.5	0.000440763	11639.3	0.773999	11853.5	0.4678	11853.5	0.0662	11853.5	-0.00427616	11853.5	0.09516
11843.1	9.24164e-06	11843.1	0.02325	11843.1	-0.000289465	11843.1	0.07	11843.1	0.000695094	11843.1	0.00937	11843.1	-0.00111294	11843.1	0.000205034	11629.3	0.7712	11843.1	0.4713	11843.1	0.0587	11843.1	-0.00498093	11843.1	0.09044
11832.8	-0.000349257	11832.8	0.02415	11832.8	1.40461e-05	11832.8	0.0693	11832.8	0.000638672	11832.8	0.00938	11832.8	-0.00103647	11832.8	0.000486924	11619.4	0.768407	11832.8	0.4763	11832.8	0.0509	11832.8	-0.0061857	11832.8	0.08262
11822.4	-0.000307653	11822.4	0.02415	11822.4	-0.000882442	11822.4	0.0685	11822.4	0.00158235	11822.4	0.00798	11822.4	-0.000859952	11822.4	0.000227466	11609.4	0.76552	11822.4	0.4809	11822.4	0.0462	11822.4	-0.00639046	11822.4	0.0773
11812.1	-0.000165947	11812.1	0.02235	11812.1	-0.00127893	11812.1	0.0683	11812.1	0.000626123	11812.1	0.00819	11812.1	-0.000783395	11812.1	-0.000426096	11599.4	0.762581	11812.1	0.4868	11812.1	0.0414	11812.1	-0.00149523	11812.1	0.07558
11801.8	-0.00102	11801.8	0.02195	11801.8	-0.00137542	11801.8	0.0685	11801.8	6.99956e-05	11801.8	0.00749	11801.8	-0.000906797	11801.8	7.64533e-05	11589.5	0.759615	11801.8	0.4899	11801.8	0.0372	11801.8	0	11801.8	0.07806
11791.5	-8.22301e-05	11791.5	0.02225	11791.5	-0.000571908	11791.5	0.0688	11791.5	0.000313966	11791.5	0.0066	11791.5	-0.00163016	11791.5	0.000763954	11579.6	0.756657	11791.5	0.4926	11791.5	0.0338	11791.5	-0.00273784	11791.5	0.07974
11781.2	-0.000940219	11781.2	0.02105	11781.2	-0.0012684	11781.2	0.0686	11781.2	-0.00124197	11781.2	0.0066	11781.2	-0.00075348	11781.2	0.000643965	11569.7	0.753743	11781.2	0.4927	11781.2	0.0319	11781.2	-0.000775689	11781.2	0.08292
11770.9	-0.000898108	11770.9	0.01996	11770.9	-0.00206488	11770.9	0.069	11770.9	-0.000397799	11770.9	0.00601	11770.9	-0.00017676	11770.9	-0.000272123	11559.9	0.750943	11770.9	0.4901	11770.9	0.0301	11770.9	0.000686466	11770.9	0.0876
11760.7	-0.000655896	11760.7	0.02036	11760.7	-0.00106137	11760.7	0.0686	11760.7	0.00104646	11760.7	0.00631	11760.7	0	11760.7	0.000430448	11550	0.748184	11760.7	0.4916	11760.7	0.0282	11760.7	0.000948622	11760.7	0.09378
11750.5	-0.00161	11750.5	0.02066	11750.5	-0.000457862	11750.5	0.0681	11750.5	0.000290824	11750.5	0.00632	11750.5	-0.000325675	11750.5	0.000486185	11540.1	0.745464	11750.5	0.4902	11750.5	0.0274	11750.5	-0.000189223	11750.5	0.09865
11740.3	-0.00087117	11740.3	0.01866	11740.3	-5.43501e-05	11740.3	0.0682	11740.3	0.000135281	11740.3	0.00542	11740.3	-0.000551306	11740.3	0.00137892	11530.3	0.742734	11740.3	0.4897	11740.3	0.0249	11740.3	-0.00182707	11740.3	0.10143
11730.1	-0.00133	11730.1	0.02016	11730.1	-0.000250839	11730.1	0.0682	11730.1	0.000279834	11730.1	0.00423	11730.1	-0.000576892	11730.1	0.000883075	11520.6	0.740027	11730.1	0.487	11730.1	0.0242	11730.1	0.00193509	11730.1	0.10161
11719.9	-0.000386044	11719.9	0.02126	11719.9	-0.000447327	11719.9	0.0684	11719.9	-7.55167e-05	11719.9	0.00393	11719.9	-0.000202434	11719.9	0.00108679	11510.8	0.737239	11719.9	0.4818	11719.9	0.0233	11719.9	0.00659724	11719.9	0.10239
11709.7	-0.00134	11709.7	0.02086	11709.7	-0.000243816	11709.7	0.068	11709.7	6.92285e-05	11709.7	0.00434	11709.7	-0.000427932	11709.7	0.00048109	11501	0.734378	11709.7	0.4755	11709.7	0.0207	11709.7	0.0027594	11709.7	0.09857
11699.6	-0.0013	11699.6	0.02226	11699.6	-0.000540304	11699.6	0.0672	11699.6	-0.000285931	11699.6	0.00475	11699.6	-0.00265339	11699.6	0.00123812	11491.2	0.731455	11699.6	0.4665	11699.6	0.0209	11699.6	0.000221554	11699.6	0.09565
11689.6	-0.000956839	11689.6	0.02136	11689.6	-0.00013684	11689.6	0.0681	11689.6	0.000159749	11689.6	0.00435	11689.6	-0.00187845	11689.6	0.000109028	11481.6	0.72852	11689.6	0.4595	11689.6	0.0211	11689.6	0.00389098	11689.6	0.09252
11679.5	-0.00121	11679.5	0.01896	11679.5	-0.00103333	11679.5	0.0684	11679.5	0.00040478	11679.5	0.00396	11679.5	-0.00110382	11679.5	-0.00019832	11471.8	0.725498	11679.5	0.4499	11679.5	0.0211	11679.5	-0.000146867	11679.5	0.0883
11669.4	-0.00167	11669.4	0.02046	11669.4	-0.00142982	11669.4	0.0671	11669.4	0.000249905	11669.4	0.00306	11669.4	-0.00102914	11669.4	0.00057806	11462.1	0.722434	11669.4	0.4391	11669.4	0.021	11669.4	0.000515288	11669.4	0.08458
11659.4	-0.000927521	11659.4	0.01946	11659.4	-0.00112631	11659.4	0.0677	11659.4	0.00159512	11659.4	0.00407	11659.4	-0.00125442	11659.4	0.00133815	11452.5	0.719371	11659.4	0.432	11659.4	0.0202	11659.4	-0.00152256	11659.4	0.07946
11649.3	-0.000484218	11649.3	0.01796	11649.3	-0.00102279	11649.3	0.0666	11649.3	-0.000259561	11649.3	0.00447	11649.3	-0.00197965	11649.3	0.00127454	11442.8	0.716226	11649.3	0.4223	11649.3	0.0206	11649.3	-0.0014604	11649.3	0.07593
11639.3	-0.00124	11639.3	0.01596	11639.3	-0.000619282	11639.3	0.0673	11639.3	0.00158585	11639.3	0.00458	11639.3	-0.00200484	11639.3	0.000679276	11433.1	0.713042	11639.3	0.4112	11639.3	0.0203	11639.3	0.00670175	11639.3	0.07411
11629.3	-0.000297321	11629.3	0.01726	11629.3	-0.000815771	11629.3	0.0673	11629.3	0.00213135	11629.3	0.00318	11629.3	-0.00232999	11629.3	0.000206239	11423.5	0.709857	11629.3	0.4002	11629.3	0.0206	11629.3	0.00826391	11629.3	0.07279
11619.4	-0.00115	11619.4	0.01676	11619.4	-0.000512307	11619.4	0.0672	11619.4	0.00147768	11619.4	0.00369	11619.4	-0.00225476	11619.4	-0.000107116	11414	0.707313	11619.4	0.3918	11619.4	0.0205	11619.4	0.00353333	11619.4	0.07236
11609.4	-0.000109275	11609.4	0.01466	11609.4	-8.79518e-06	11609.4	0.0669	11609.4	0.00172337	11609.4	0.00319	11609.4	-0.00307982	11609.4	-0.000929273	11404.3	0.70517	11609.4	0.3805	11609.4	0.0187	11609.4	0.00669549	11609.4	0.07254
11599.4	-0.000165488	11599.4	0.01447	11599.4	0.000294716	11599.4	0.0668	11599.4	0.00156915	11599.4	0.0034	11599.4	-0.00230484	11599.4	-0.000621857	11394.8	0.70307	11599.4	0.3691	11599.4	0.018	11599.4	0.00465764	11599.4	0.07122
11589.5	-0.000421605	11589.5	0.01517	11589.5	-0.000201772	11589.5	0.0666	11589.5	0.00191503	11589.5	0.0037	11589.5	-0.00222982	11589.5	-0.00116275	11385.2	0.70072	11589.5	0.3597	11589.5	0.0184	11589.5	0.0039198	11589.5	0.07149
11579.6	-0.000377626	11579.6	0.01427	11579.6	0.000301739	11579.6	0.0659	11579.6	0.00136099	11579.6	0.00301	11579.6	-0.00235475	11579.6	0.000222936	11197.7	0.680837	11579.6	0.3541	11579.6	0.0184	11579.6	0.00138195	11579.6	0.07027
11569.7	-0.00013355	11569.7	0.01317	11569.7	0.00110525	11569.7	0.0674	11569.7	0.00120705	11569.7	0.00271	11569.7	-0.00197964	11569.7	0.000623142	11124.5	0.676701	11569.7	0.3471	11569.7	0.0197	11569.7	0.00314411	11569.7	0.07005
11559.9	-0.00109	11559.9	0.01357	11559.9	0.000708715	11559.9	0.0679	11559.9	0.000953932	11559.9	0.00312	11559.9	-0.00210415	11559.9	0.000965418	11106.4	0.675413	11559.9	0.3395	11559.9	0.0203	11559.9	-0.00108647	11559.9	0.07092
11550	-0.00024436	11550	0.01457	11550	0.000812227	11550	0.0672	11550	0.00140018	11550	0.00262	11550	-0.00252896	11550	0.000302677	11097.3	0.674645	11550	0.3319	11550	0.0212	11550	7.56892e-05	11550	0.0732
11540.1	0	11540.1	0.01427	11540.1	0.000615738	11540.1	0.0673	11540.1	0.00114651	11540.1	0.00273	11540.1	-0.00235372	11540.1	0.000150114	11088.3	0.673843	11540.1	0.3251	11540.1	0.0207	11540.1	0.00423784	11540.1	0.07357
11530.3	-0.000188187	11530.3	0.01357	11530.3	0.00071925	11530.3	0.0679	11530.3	-0.000307064	11530.3	0.00233	11530.3	-0.00187845	11530.3	-0.000713921	11079.2	0.67302	11530.3	0.3195	11530.3	0.0213	11530.3	0	11530.3	0.07605
11520.6	0.000224965	11520.6	0.01347	11520.6	0.000422714	11520.6	0.0669	11520.6	0.000740176	11520.6	0.00154	11520.6	-0.00210279	11520.6	0.000732068	10998.9	0.6645	11520.6	0.3132	11520.6	0.0204	11520.6	0.00110425	11520.6	0.07912
11510.8	0.000437076	11510.8	0.01287	11510.8	0.000226225	11510.8	0.0684	11510.8	0.00158678	11510.8	0.00184	11510.8	-0.00232743	11510.8	0.000489762	10990	0.663212	11510.8	0.3053	11510.8	0.0215	11510.8	0.00359897	11510.8	0.0859
11501	0.000249337	11501	0.01217	11501	0.00112974	11501	0.0669	11501	0.00193348	11501	0.00195	11501	-0.00225203	11501	-0.000533558	10981.2	0.66188	11501	0.2993	11501	0.0211	11501	0.00649369	11501	0.09117
11491.2	0.000861748	11491.2	0.01287	11491.2	0.000933248	11491.2	0.0676	11491.2	0.00138027	11491.2	0.00185	11491.2	-0.00297658	11491.2	-0.000553071	10972.4	0.660486	11491.2	0.2919	11491.2	0.0216	11491.2	0.00458841	11491.2	0.09635
11481.6	0.00108	11481.6	0.01157	11481.6	0.00143671	11481.6	0.0676	11481.6	0.00192787	11481.6	0.00176	11481.6	-0.00280076	11481.6	-0.000210274	10963.6	0.659033	11481.6	0.2849	11481.6	0.0222	11481.6	0.00319266	11481.6	0.10202
11471.8	-0.000111807	11471.8	0.01317	11471.8	0.00174022	11471.8	0.0674	11471.8	0.00157484	11471.8	0.00156	11471.8	-0.00282523	11471.8	-0.000149551	10954.7	0.657505	11471.8	0.2765	11471.8	0.0227	11471.8	0.00138738	11471.8	0.1089
11462.1	0.000301046	11462.1	0.01167	11462.1	0.000743735	11462.1	0.0681	11462.1	0.000521896	11462.1	0.000968115	11462.1	-0.00254966	11462.1	-0.00036471	10841.8	0.632947	11462.1	0.2688	11462.1	0.0237	11462.1	-0.000317902	11462.1	0.11247
11452.5	-0.000384778	11452.5	0.01237	11452.5	0.000447199	11452.5	0.0682	11452.5	0.00126976	11452.5	0.00157	11452.5	-0.00277372	11452.5	0.000165625	10833.2	0.630559	11452.5	0.2629	11452.5	0.0225	11452.5	0.00208635	11452.5	0.11535
11442.8	-7.16312e-05	11442.8	0.01447	11442.8	0.00145071	11442.8	0.0682	11442.8	0.00191699	11442.8	0.00128	11442.8	-0.00269807	11442.8	-0.000403676	10824.6	0.6281	11442.8	0.2575	11442.8	0.0246	11442.8	0.00478107	11442.8	0.11362
11433.1	-0.000358338	11433.1	0.01348	11433.1	0.00125422	11433.1	0.0686	11433.1	0.00186432	11433.1	0.00088308	11433.1	-0.00182238	11433.1	0.000435981	10816.1	0.625566	11433.1	0.2496	11433.1	0.0257	11433.1	0.00407579	11433.1	0.1138
11423.5	0.000155103	11423.5	0.01378	11423.5	0.00175773	11423.5	0.0684	11423.5	0.00221173	11423.5	0.000688074	11423.5	-0.00184664	11423.5	0.000817251	10807.5	0.62287	11423.5	0.2434	11423.5	0.0277	11423.5	0.00287051	11423.5	0.11407
11414	-0.000130144	11414	0.01298	11414	0.0025612	11414	0.0682	11414	0.00175995	11414	0.000492992	11414	-0.00197054	11414	0.000888556	10798.9	0.620015	11414	0.2378	11414	0.0288	11414	0.00317476	11414	0.11804
11404.3	-0.000116414	11404.3	0.01238	11404.3	0.00236471	11404.3	0.0694	11404.3	0.00110754	11404.3	0.000797969	11404.3	-0.00179473	11404.3	0.00147198	10790.4	0.617035	11404.3	0.2326	11404.3	0.0303	11404.3	0.00276948	11404.3	0.12122
11394.8	-1.37542e-06	11394.8	0.01208	11394.8	0.00296817	11394.8	0.0698	11394.8	0.00145592	11394.8	0.000302871	11394.8	-0.00131854	11394.8	0.00183335	10781.9	0.61397	11394.8	0.228	11394.8	0.032	11394.8	0.00667373	11394.8	0.12529
11385.2	-8.73565e-05	11385.2	0.01098	11385.2	0.00317169	11385.2	0.07	11385.2	0.00230369	11385.2	0.000807831	11385.2	-0.00184265	11385.2	0.00180116	10773.4	0.610912	11385.2	0.2243	11385.2	0.033	11385.2	0.00416845	11385.2	0.13247
11375.7	0.000326807	11375.7	0.01108	11375.7	0.0027752	11375.7	0.0703	11375.7	0.00325155	11375.7	0.00101	11375.7	-0.00216671	11375.7	0.000770084	10765	0.607848	11375.7	0.2207	11375.7	0.0354	11375.7	0.00226316	11375.7	0.13564
11366.2	-0.000457728	11366.2	0.01028	11366.2	0.00257866	11366.2	0.0695	11366.2	0.00320019	11366.2	0.00172	11366.2	-0.00229041	11366.2	-1.34732e-06	10756.5	0.604807	11366.2	0.2175	11366.2	0.04	11366.2	0.00356741	11366.2	0.14021
11356.7	-0.00114	11356.7	0.00658	11356.7	-0.000617828	11356.7	0.0677	11356.7	0.00264822	11356.7	0.00232	11356.7	-0.00461439	11356.7	-0.000868163	10748.1	0.60175	11356.7	0.215	11356.7	0.0504	11356.7	0.00476213	11356.7	0.14499
11347.1	-0.00203	11347.1	0.00208	11347.1	-0.00471432	11347.1	0.0639	11347.1	0.00209633	11347.1	0.00373	11347.1	-0.00613833	11347.1	-0.000779642	10739.6	0.598675	11347.1	0.2131	11347.1	0.0628	11347.1	0.00135685	11347.1	0.14586
11337.7	-0.00311	11337.7	0.000281115	11337.7	-0.00781085	11337.7	0.0623	11337.7	0.00114524	11337.7	0.00423	11337.7	-0.00806191	11337.7	-0.0012088	10731.2	0.595578	11337.7	0.2116	11337.7	0.0722	11337.7	-0.0061389	11337.7	0.14513
11328.2	-0.003	11328.2	-0.000418291	11328.2	-0.00730734	11328.2	0.0646	11328.2	0.000893525	11328.2	0.00394	11328.2	-0.00768577	11328.2	-0.00137833	10722.8	0.592462	11328.2	0.211	11328.2	0.0745	11328.2	-0.00764418	11328.2	0.1436
11318.9	-0.00258	11318.9	0.00218	11318.9	-0.00490388	11318.9	0.0687	11318.9	0.000842597	11318.9	0.00294	11318.9	-0.00560928	11318.9	-0.00185092	10714.4	0.589362	11318.9	0.2118	11318.9	0.0705	11318.9	-0.00743993	11318.9	0.13888
11309.4	-0.00267	11309.4	0.00428	11309.4	-0.00210036	11309.4	0.0747	11309.4	0.00119106	11309.4	0.00175	11309.4	-0.00463306	11309.4	-0.00171235	10706.1	0.586291	11309.4	0.2133	11309.4	0.0641	11309.4	-0.00614521	11309.4	0.13345
11299.9	-0.00245	11299.9	0.00578	11299.9	-0.00109685	11299.9	0.0809	11299.9	0.0010396	11299.9	0.00125	11299.9	-0.0036568	11299.9	-0.000908892	10697.7	0.583248	11299.9	0.2146	11299.9	0.0577	11299.9	-0.00255049	11299.9	0.12702
11290.6	-0.00123	11290.6	0.00668	11290.6	0.000606611	11290.6	0.0855	11290.6	0.00168893	11290.6	0.000556718	11290.6	-0.00218019	11290.6	9.83518e-05	10689.4	0.580236	11290.6	0.2155	11290.6	0.0525	11290.6	0.00115376	11290.6	0.11519
11281.2	-0.000819115	11281.2	0.00638	11281.2	0.00111012	11281.2	0.0884	11281.2	0.00193765	11281.2	6.1588e-05	11281.2	-0.00130385	11281.2	0.000486398	10681	0.577258	11281.2	0.2165	11281.2	0.0486	11281.2	0.000448482	11281.2	0.10297
11271.9	-0.0011	11271.9	0.00639	11271.9	0.00186846	11271.9	0.0882	11271.9	0.00178714	11271.9	-0.000433615	11271.9	-0.00102716	11271.9	-1.90623e-05	10672.7	0.574314	11271.9	0.2177	11271.9	0.0469	11271.9	-0.00114727	11271.9	0.09264
11262.5	-0.00088639	11262.5	0.00699	11262.5	0.00168843	11262.5	0.0859	11262.5	0.00103603	11262.5	-0.000828761	11262.5	-0.000550743	11262.5	-0.000225002	10664.4	0.57141	11262.5	0.2183	11262.5	0.0456	11262.5	0.00504745	11262.5	0.08431
11253.3	-6.92522e-05	11253.3	0.00859	11253.3	0.00271084	11253.3	0.0842	11253.3	0.00138569	11253.3	-0.000423981	11253.3	-0.000873973	11253.3	0.000982081	10656.1	0.568547	11253.3	0.2179	11253.3	0.0463	11253.3	0.0065517	11253.3	0.07768
11243.9	-0.000353111	11243.9	0.00889	11243.9	0.00353082	11243.9	0.0847	11243.9	0.00193474	11243.9	-0.000519143	11243.9	-0.00109748	11243.9	0.00139115	10647.8	0.56573	11243.9	0.2186	11243.9	0.0469	11243.9	0.00524642	11243.9	0.07115
11234.7	-0.0002357	11234.7	0.00839	11234.7	0.00325322	11234.7	0.0854	11234.7	0.00198457	11234.7	-0.000514378	11234.7	-0.00162063	11234.7	0.000690281	10639.5	0.562917	11234.7	0.2186	11234.7	0.05	11234.7	0.00545067	11234.7	0.06632
11225.4	0.000280718	11225.4	0.00769	11225.4	0.0034732	11225.4	0.0863	11225.4	0.0011338	11225.4	-0.000409555	11225.4	-0.00164406	11225.4	0.000776909	10631.3	0.560087	11225.4	0.2178	11225.4	0.0538	11225.4	0.00514539	11225.4	0.0649
11216.2	0.000198401	11216.2	0.00569	11216.2	0.0027956	11216.2	0.0853	11216.2	0.00178379	11216.2	-0.000304806	11216.2	-0.00136714	11216.2	0.000788136	10623.2	0.557259	11216.2	0.2176	11216.2	0.0587	11216.2	-0.00245036	11216.2	0.06237
11206.9	0.000515094	11206.9	0.00549	11206.9	0.00301558	11206.9	0.0824	11206.9	0.00223318	11206.9	0	11206.9	-0.00219049	11206.9	6.86029e-05	10614.9	0.554384	11206.9	0.2168	11206.9	0.0653	11206.9	-0.00345564	11206.9	0.06064
11197.7	3.30482e-05	11197.7	0.00529	11197.7	0.00263798	11197.7	0.0781	11197.7	0.00158334	11197.7	0.000476373	11197.7	-0.00231349	11197.7	-0.000147782	10606.7	0.551477	11197.7	0.215	11197.7	0.0737	11197.7	-0.00665139	11197.7	0.06051
11188.4	-0.000549985	11188.4	0.00339	11188.4	0.00145796	11188.4	0.075	11188.4	0.00143289	11188.4	0.000752461	11188.4	-0.00313677	11188.4	-0.000760028	10598.5	0.548526	11188.4	0.2135	11188.4	0.0834	11188.4	-0.00715667	11188.4	0.06108
11179.3	-0.00113	11179.3	0.00189	11179.3	0.000480363	11179.3	0.0733	11179.3	0.00188321	11179.3	0.00113	11179.3	-0.0044597	11179.3	-0.000588297	10590.3	0.545587	11179.3	0.2117	11179.3	0.0909	11179.3	-0.00975242	11179.3	0.06115
11170.1	-0.000814522	11170.1	0.00099175	11170.1	0.000400337	11170.1	0.0736	11170.1	0.00163294	11170.1	0.000705079	11170.1	-0.0047829	11170.1	-0.000733203	10582.1	0.542596	11170.1	0.2107	11170.1	0.0946	11170.1	-0.0128577	11170.1	0.06132
11161	-0.00049603	11161	0.00149	11161	0.00172274	11161	0.0744	11161	0.00178342	11161	0.00108	11161	-0.00480575	11161	-0.00102619	10574	0.539617	11161	0.2107	11161	0.0915	11161	-0.0132534	11161	0.06029
11151.9	-0.000577405	11151.9	0.00439	11151.9	0.00284515	11151.9	0.076	11151.9	0.00273399	11151.9	0.000558172	11151.9	-0.00352856	11151.9	-0.000760286	10565.8	0.53663	11151.9	0.211	11151.9	0.0865	11151.9	-0.0089492	11151.9	0.05856
11142.7	4.02399e-05	11142.7	0.00479	11142.7	0.00246512	11142.7	0.0762	11142.7	0.00308396	11142.7	0.000134456	11142.7	-0.00265165	11142.7	-0.00030542	10557.8	0.533669	11142.7	0.2106	11142.7	0.0818	11142.7	-0.00525448	11142.7	0.05633
11133.6	0.000659131	11133.6	0.00449	11133.6	0.00238753	11133.6	0.0766	11133.6	0.00293468	11133.6	0.000211099	11133.6	-0.00197438	11133.6	-3.7562e-05	10549.6	0.530669	11133.6	0.2102	11133.6	0.0774	11133.6	-0.00795023	11133.6	0.0547
11124.5	-0.000122955	11124.5	0.00489	11124.5	0.0018075	11124.5	0.0765	11124.5	0.00278481	11124.5	-0.00031254	11124.5	-0.00179739	11124.5	0.00102834	10541.5	0.527672	11124.5	0.2098	11124.5	0.0741	11124.5	-0.00665551	11124.5	0.05347
11106.4	-0.000584512	11106.4	0.0037	11106.4	0.00225232	11106.4	0.0755	11106.4	0.00248667	11106.4	-0.000559065	11106.4	-0.00274268	11106.4	0.00106526	10533.4	0.524672	11106.4	0.2093	11106.4	0.0682	11106.4	-0.00154701	11106.4	0.05041
11097.3	0.000233802	11097.3	0.0038	11097.3	0.00207229	11097.3	0.0748	11097.3	0.00233704	11097.3	-0.000582588	11097.3	-0.00126558	11097.3	0.00155571	10521.2	0.520155	11097.3	0.2089	11097.3	0.0662	11097.3	0.000247709	11097.3	0.04918
11088.3	0.000253352	11088.3	0.0038	11088.3	0.0014947	11088.3	0.0745	11088.3	0.00248817	11088.3	-0.000305756	11088.3	-0.00118814	11088.3	0.00137595	10503	0.513374	11088.3	0.2078	11088.3	0.0653	11088.3	0.00035196	11088.3	0.04975
11079.2	0.000271933	11079.2	0.0037	11079.2	0.00121467	11079.2	0.0725	11079.2	0.00223871	11079.2	-0.000329202	11079.2	-0.00171096	11079.2	0.0021434	10484.8	0.506477	11079.2	0.2068	11079.2	0.0663	11079.2	-0.00225332	11079.2	0.05042
11070.3	0.000691745	11070.3	0.0011	11070.3	0.000337079	11070.3	0.07	11070.3	0.00288999	11070.3	0.000847705	11070.3	-0.00313344	11070.3	0.00210715	10466.8	0.49945	11070.3	0.2058	11070.3	0.0726	11070.3	-0.00624907	11070.3	0.05079
11061.3	0.000311686	11061.3	-0.0033	11061.3	-0.00124051	11061.3	0.0675	11061.3	0.00224136	11061.3	0.00162	11061.3	-0.00455588	11061.3	0.00128007	10448.8	0.492275	11061.3	0.2051	11061.3	0.0809	11061.3	-0.0107448	11061.3	0.05216
11052.3	-0.000169338	11052.3	-0.0031	11052.3	-0.00142054	11052.3	0.0662	11052.3	0.00239214	11052.3	0.0018	11052.3	-0.0050786	11052.3	0.000972539	10430.8	0.485025	11052.3	0.2045	11052.3	0.0839	11052.3	-0.0125501	11052.3	0.05363
11043.4	-0.000149137	11043.4	0	11043.4	-0.00119813	11043.4	0.0661	11043.4	0.00224366	11043.4	0.00108	11043.4	-0.00410097	11043.4	0.00122085	10412.9	0.477829	11043.4	0.2052	11043.4	0.08	11043.4	-0.0120459	11043.4	0.0522
11034.5	-2.88074e-05	11034.5	0.00272	11034.5	-0.000375727	11034.5	0.0676	11034.5	0.00279526	11034.5	0.000755394	11034.5	-0.0030233	11034.5	0.00294233	10395	0.470829	11034.5	0.2062	11034.5	0.072	11034.5	-0.0089416	11034.5	0.04877
11025.6	0.00019165	11025.6	0.00344	11025.6	4.66796e-05	11025.6	0.0677	11025.6	0.00344694	11025.6	-0.000367512	11025.6	-0.0019456	11025.6	0.00502568	10377.2	0.463846	11025.6	0.2077	11025.6	0.0641	11025.6	-0.00543735	11025.6	0.04453
11016.6	0.000611149	11016.6	0.00406	11016.6	0.000166653	11016.6	0.0684	11016.6	0.00309803	11016.6	-0.000890695	11016.6	-0.00166817	11016.6	0.00706976	10359.6	0.456678	11016.6	0.2095	11016.6	0.0576	11016.6	-0.00644263	11016.6	0.0407
11007.8	0.000731864	11007.8	0.00338	11007.8	0.00068906	11007.8	0.0686	11007.8	0.00164987	11007.8	-0.000613527	11007.8	-0.000990394	11007.8	0.00902319	10341.9	0.449683	11007.8	0.2113	11007.8	0.0521	11007.8	-0.00383838	11007.8	0.03637
10998.9	0.000752707	10998.9	0.0027	10998.9	0.00131147	10998.9	0.0689	10998.9	0.00200178	10998.9	-0.000836322	10998.9	-0.00121258	10998.9	0.011632	10324.3	0.443229	10998.9	0.2132	10998.9	0.0486	10998.9	-0.00133413	10998.9	0.03194
10990	0.00117	10990	0.00212	10990	0.00133144	10990	0.0683	10990	0.00175311	10990	-0.00116	10990	-0.00103504	10990	0.0133369	10306.7	0.437128	10990	0.2153	10990	0.0466	10990	-0.00143941	10990	0.02961
10981.2	0.00139	10981.2	0.00164	10981.2	0.00145385	10981.2	0.0685	10981.2	0.00200518	10981.2	-0.000682114	10981.2	-0.00115716	10981.2	0.0156152	10289.3	0.431159	10981.2	0.2171	10981.2	0.0452	10981.2	0.00196484	10981.2	0.02708
10972.4	0.00131	10972.4	0.00166	10972.4	0.00147625	10972.4	0.0687	10972.4	0.00135732	10972.4	-0.0008048	10972.4	-0.000879245	10972.4	0.0161905	10271.9	0.425248	10972.4	0.2192	10972.4	0.0446	10972.4	0.00426909	10972.4	0.02554
10963.6	0.00114	10963.6	0.00118	10963.6	0.00119866	10963.6	0.0684	10963.6	0.00100954	10963.6	-0.000727449	10963.6	-0.000901293	10963.6	0.0161793	10254.5	0.419725	10963.6	0.2207	10963.6	0.0447	10963.6	0.00387334	10963.6	0.02451
10954.7	0.000656668	10954.7	0.001	10954.7	0.000818634	10954.7	0.0685	10954.7	0.000761186	10954.7	-0.000750371	10954.7	-0.00122361	10954.7	0.0160527	10237.3	0.414595	10954.7	0.2218	10954.7	0.0453	10954.7	0.00636806	10954.7	0.02368
10945.9	7.82715e-05	10945.9	0.0002239	10945.9	0.000341041	10945.9	0.0681	10945.9	0.00091356	10945.9	-0.000572948	10945.9	-0.00174558	10945.9	0.0159626	10151.7	0.394457	10945.9	0.2225	10945.9	0.0475	10945.9	0.00387231	10945.9	0.02195
10937.2	0	10937.2	-0.00146	10937.2	-0.000736552	10937.2	0.0675	10937.2	0.00056601	10937.2	-0.000195488	10937.2	-0.00246753	10937.2	0.0153756	10134.8	0.39138	10937.2	0.2226	10937.2	0.0512	10937.2	-0.00192344	10937.2	0.02091
10928.5	-0.000710233	10928.5	-0.00244	10928.5	-0.00221415	10928.5	0.0666	10928.5	0.000218536	10928.5	0.000282008	10928.5	-0.00368943	10928.5	0.0140399	10001.3	0.397426	10928.5	0.222	10928.5	0.0563	10928.5	-0.00391919	10928.5	0.02078
10919.7	-0.00122	10919.7	-0.00321	10919.7	-0.00349417	10919.7	0.0664	10919.7	-0.000429511	10919.7	0.000159232	10919.7	-0.00431161	10919.7	0.0139469	9984.92	0.402112	10919.7	0.2219	10919.7	0.06	10919.7	-0.00492447	10919.7	0.02095
10911	-0.00113	10911	-0.00339	10911	-0.00337177	10911	0.0666	10911	-0.000676833	10911	-6.32005e-05	10911	-0.00473344	10911	0.0140665	9968.5	0.407531	10911	0.2224	10911	0.0604	10911	-0.00352022	10911	0.01882
10902.3	-0.000941789	10902.3	-0.00237	10902.3	-0.00294936	10902.3	0.0674	10902.3	7.59203e-05	10902.3	1.44031e-05	10902.3	-0.00425524	10902.3	0.0140302	9952.23	0.4136	10902.3	0.2237	10902.3	0.0582	10902.3	-0.00521597	10902.3	0.01788
10893.6	-0.00135	10893.6	-0.00196	10893.6	-0.00192695	10893.6	0.0672	10893.6	-0.000271251	10893.6	-0.000407958	10893.6	-0.00387701	10893.6	0.0143852	9935.91	0.42037	10893.6	0.2251	10893.6	0.0545	10893.6	-0.00541172	10893.6	0.01755
10884.9	-0.00116	10884.9	-0.00144	10884.9	-0.00140455	10884.9	0.067	10884.9	-0.000218347	10884.9	-0.000530283	10884.9	-0.00289874	10884.9	0.0148878	9919.75	0.427749	10884.9	0.2264	10884.9	0.0515	10884.9	-0.00440747	10884.9	0.01622
10876.3	-0.000867472	10876.3	-0.00102	10876.3	-0.00108214	10876.3	0.0665	10876.3	3.46309e-05	10876.3	-0.000652573	10876.3	-0.00262044	10876.3	0.014512	9903.64	0.435741	10876.3	0.2267	10876.3	0.0489	10876.3	-0.00440322	10876.3	0.01498
10867.6	-0.000578217	10867.6	-0.000393656	10867.6	-0.00146216	10867.6	0.0663	10867.6	0.000287041	10867.6	-0.000475132	10867.6	-0.0027424	10867.6	0.0139838	9887.48	0.444419	10867.6	0.2269	10867.6	0.0471	10867.6	-0.0041085	10867.6	0.01285
10858.9	-0.000185782	10858.9	2.62508e-05	10858.9	-0.00113976	10858.9	0.0664	10858.9	4.01698e-05	10858.9	-0.000197351	10858.9	-0.00256403	10858.9	0.0139402	9871.47	0.453525	10858.9	0.2272	10858.9	0.0461	10858.9	-0.00220425	10858.9	0.01142
10850.3	-0.000193019	10850.3	-5.38427e-05	10850.3	-0.000717352	10850.3	0.0662	10850.3	0.000393373	10850.3	-0.000719534	10850.3	-0.00218563	10850.3	0.0132952	9855.52	0.464175	10850.3	0.2273	10850.3	0.0453	10850.3	0	10850.3	0.00998
10841.8	-9.99268e-05	10841.8	0.000566064	10841.8	-0.000694945	10841.8	0.0666	10841.8	4.66493e-05	10841.8	-0.000641682	10841.8	-0.00190719	10841.8	0.0129878	9839.52	0.474448	10841.8	0.2272	10841.8	0.0449	10841.8	0.000737687	10841.8	0.00965
10833.2	9.34922e-05	10833.2	0.00098597	10833.2	-0.000172538	10833.2	0.0666	10833.2	0	10833.2	-0.000863796	10833.2	-0.00142871	10833.2	0.0128715	9823.67	0.484038	10833.2	0.2266	10833.2	0.0444	10833.2	0.00127537	10833.2	0.00872
10824.6	0.000287238	10824.6	0.00131	10824.6	4.98683e-05	10824.6	0.0669	10824.6	-0.000309055	10824.6	-0.000985874	10824.6	-0.000950207	10824.6	0.0123737	9807.86	0.492535	10824.6	0.2263	10824.6	0.044	10824.6	0.00231306	10824.6	0.00758
10816.1	0.000481309	10816.1	0.00133	10816.1	7.2275e-05	10816.1	0.067	10816.1	8.17469e-05	10816.1	-0.000907918	10816.1	-0.000771666	10816.1	0.0118228	9792.02	0.50104	10816.1	0.2258	10816.1	0.0434	10816.1	0.00265075	10816.1	0.00675
10807.5	0.000675705	10807.5	0.00094569	10807.5	0.000294682	10807.5	0.0668	10807.5	0.000272405	10807.5	-0.000929927	10807.5	-0.000493091	10807.5	0.0115991	9776.32	0.509592	10807.5	0.2254	10807.5	0.0424	10807.5	0.00328843	10807.5	0.00681
10798.9	0.000867615	10798.9	0.000967239	10798.9	0.000514655	10798.9	0.0669	10798.9	0.00046416	10798.9	-0.00115	10798.9	-0.000514774	10798.9	0.0109576	9760.67	0.518148	10798.9	0.2252	10798.9	0.0406	10798.9	0.00281157	10798.9	0.00558
10790.4	0.000662663	10790.4	0.00109	10790.4	0.000637062	10790.4	0.0672	10790.4	0.000254531	10790.4	-0.00117	10790.4	-0.000236131	10790.4	0.0105548	9744.97	0.526188	10790.4	0.2244	10790.4	0.0383	10790.4	0.00304925	10790.4	0.00444
10781.9	0.000958034	10781.9	0.00211	10781.9	0.000459469	10781.9	0.0676	10781.9	-0.000155241	10781.9	-0.0014	10781.9	-0.000157454	10781.9	0.0105722	9729.42	0.533322	10781.9	0.2238	10781.9	0.0353	10781.9	0.00238694	10781.9	0.00301
10773.4	0.00115	10773.4	0.00223	10773.4	0.000681875	10773.4	0.0675	10773.4	-0.000165154	10773.4	-0.00122	10773.4	2.12562e-05	10773.4	0.0105756	9713.92	0.539409	10773.4	0.2233	10773.4	0.0333	10773.4	0.00122463	10773.4	0.00228
10765	0.00125	10765	0.00235	10765	0.000504282	10765	0.0676	10765	0.000124791	10765	-0.00124	10765	0	10765	0.0101489	9698.47	0.544273	10765	0.2228	10765	0.0317	10765	0.000562313	10765	0.00194
10756.5	0.00115	10756.5	0.00217	10756.5	0.000926689	10756.5	0.0674	10756.5	1.45948e-05	10756.5	-0.00106	10756.5	0.000124809	10756.5	0.00991663	9683.07	0.547775	10756.5	0.2224	10756.5	0.0301	10756.5	0	10756.5	0.00161
10748.1	0.00134	10748.1	0.00169	10748.1	0.000649095	10748.1	0.0672	10748.1	-0.000295742	10748.1	-0.000883319	10748.1	-5.04207e-05	10748.1	0.00957139	9667.63	0.54987	10748.1	0.2221	10748.1	0.029	10748.1	0.000611465	10748.1	0.00157
10739.6	0.00104	10739.6	0.00191	10739.6	0.000571502	10739.6	0.0671	10739.6	-0.00030622	10739.6	-0.000805052	10739.6	7.43107e-05	10739.6	0.00915066	9652.32	0.550567	10739.6	0.2217	10739.6	0.0276	10739.6	0.00152293	10739.6	0.00114
10731.2	0.00124	10731.2	0.00213	10731.2	0.000493909	10731.2	0.0669	10731.2	0.000183162	10731.2	-0.000726751	10731.2	-0.000200997	10731.2	0.00893259	9637.07	0.549964	10731.2	0.2215	10731.2	0.0266	10731.2	0.00173439	10731.2	0
10722.8	0.00133	10722.8	0.00185	10722.8	0.000716315	10722.8	0.0667	10722.8	0.000272404	10722.8	-0.000648416	10722.8	-0.000176343	10722.8	0.00863514	9621.86	0.548199	10722.8	0.221	10722.8	0.0258	10722.8	0.00174586	10722.8	-0.000492695
10714.4	0.00123	10714.4	0.00137	10714.4	0.000538722	10714.4	0.0669	10714.4	0.000561507	10714.4	-0.000870047	10714.4	-0.000251727	10714.4	0.00769924	9606.7	0.545423	10714.4	0.2204	10714.4	0.0255	10714.4	0.00225732	10714.4	-0.000985872
10706.1	0.00123	10706.1	0.00129	10706.1	0.000505112	10706.1	0.0669	10706.1	0.00065047	10706.1	-0.000791644	10706.1	-0.00012715	10706.1	0.00712201	9591.59	0.541786	10706.1	0.22	10706.1	0.0253	10706.1	0.00246879	10706.1	-0.00158
10697.7	0.00103	10697.7	0.00141	10697.7	0.000840868	10697.7	0.0671	10697.7	0.000439295	10697.7	-0.000613207	10697.7	-2.6119e-06	10697.7	0.00634339	9576.53	0.537426	10697.7	0.2195	10697.7	0.0252	10697.7	0.00198025	10697.7	-0.00177
10689.4	0.000928189	10689.4	0.000926025	10689.4	0.000876623	10689.4	0.0671	10689.4	0.00022798	10689.4	-0.000734737	10689.4	2.18883e-05	10689.4	0.0055633	9561.42	0.532441	10689.4	0.219	10689.4	0.0251	10689.4	0.00169172	10689.4	-0.00177
10681	0.000627373	10681	0.000245931	10681	0.000912379	10681	0.067	10681	1.65277e-05	10681	-0.000456234	10681	-0.00035365	10681	0.00489473	9546.45	0.527009	10681	0.2182	10681	0.0254	10681	0.00180318	10681	-0.00196
10672.7	0.000426869	10672.7	-0.000134162	10672.7	0.000748135	10672.7	0.0669	10672.7	-9.50629e-05	10672.7	-0.000377696	10672.7	-0.000629226	10672.7	0.00448969	9531.53	0.521206	10672.7	0.2174	10672.7	0.0259	10672.7	0.00121465	10672.7	-0.00226
10664.4	0.000326678	10664.4	-0.000214256	10664.4	0.00078389	10664.4	0.0667	10664.4	-0.000206791	10664.4	-0.000199126	10664.4	-0.00100484	10664.4	0.00404398	9516.65	0.515122	10664.4	0.2164	10664.4	0.0265	10664.4	0.000226111	10664.4	-0.00225
10656.1	0.000426798	10656.1	-0.000294349	10656.1	0.000819646	10656.1	0.0666	10656.1	-0.000118657	10656.1	-0.000120522	10656.1	-0.00128049	10656.1	0.00351823	9501.82	0.508843	10656.1	0.2154	10656.1	0.0268	10656.1	3.75754e-05	10656.1	-0.00205
10647.8	0.000427229	10647.8	-0.000474442	10647.8	0.000855401	10647.8	0.0664	10647.8	6.93408e-05	10647.8	-4.18845e-05	10647.8	-0.00145618	10647.8	0.00305192	9487.04	0.50243	10647.8	0.2142	10647.8	0.0265	10647.8	0.00014904	10647.8	-0.00165
10639.5	0.00022797	10639.5	-0.000454536	10639.5	0.00109116	10639.5	0.0666	10639.5	0.000257202	10639.5	-6.32141e-05	10639.5	-0.00133191	10639.5	0.00276597	9472.3	0.49591	10639.5	0.2127	10639.5	0.0258	10639.5	0.000160505	10639.5	-0.00125
10631.3	0.00022902	10631.3	-0.000334629	10631.3	0.00112691	10631.3	0.0666	10631.3	0.000344926	10631.3	1.54894e-05	10631.3	-0.00130767	10631.3	0.00247586	9457.61	0.489267	10631.3	0.2112	10631.3	0.025	10631.3	0.000171969	10631.3	-0.000943826
10623.2	0.000633098	10623.2	-0.000616365	10623.2	0.00116218	10623.2	0.0666	10623.2	0.000331315	10623.2	-0.000105483	10623.2	-0.00118381	10623.2	0.00228924	9442.96	0.482465	10623.2	0.2097	10623.2	0.0247	10623.2	-0.000109874	10623.2	-0.000546345
10614.9	0.00083476	10614.9	-0.000796459	10614.9	0.00119793	10614.9	0.0665	10614.9	0.00041877	10614.9	7.32861e-05	10614.9	-0.00105965	10614.9	0.00209407	9428.36	0.475466	10614.9	0.2083	10614.9	0.0245	10614.9	-9.84092e-05	10614.9	-0.000145197
10606.7	0.000736729	10606.7	-0.00108	10606.7	0.00113369	10606.7	0.0664	10606.7	0.000406089	10606.7	5.2088e-05	10606.7	-0.00103553	10606.7	0.00166519	9413.8	0.468237	10606.7	0.2066	10606.7	0.0241	10606.7	-0.000186945	10606.7	-4.45143e-05
10598.5	0.000439005	10598.5	-0.00146	10598.5	0.00106945	10598.5	0.0664	10598.5	0.000393273	10598.5	-6.90773e-05	10598.5	-0.00131144	10598.5	0.00127852	9399.29	0.460776	10598.5	0.2049	10598.5	0.0237	10598.5	0.00042452	10598.5	-0.000244297
10590.3	0.000241587	10590.3	-0.00144	10590.3	0.0012052	10590.3	0.0664	10590.3	0.000380322	10590.3	-0.00019021	10590.3	-0.00138739	10590.3	0.000946691	9384.91	0.453164	10590.3	0.2031	10590.3	0.0235	10590.3	0.000835985	10590.3	-0.000244545
10582.1	0.000144474	10582.1	-0.00122	10582.1	0.00144096	10582.1	0.0663	10582.1	0.000467236	10582.1	-0.00021131	10582.1	-0.00146338	10582.1	0.000746012	9370.49	0.445384	10582.1	0.2013	10582.1	0.0235	10582.1	0.00104745	10582.1	-0.000145255
10574	4.76645e-05	10574	-0.000996926	10574	0.00147671	10574	0.0662	10574	0.000554017	10574	-0.000232377	10574	-0.00153941	10574	0.000521012	9356.11	0.43759	10574	0.1995	10574	0.0234	10574	0.00105891	10574	-4.64275e-05
10565.8	-0.000148841	10565.8	-0.000677019	10565.8	0.00131247	10565.8	0.0661	10565.8	0.000440663	10565.8	-0.000253412	10565.8	-0.00181547	10565.8	0.000408366	9341.78	0.429882	10565.8	0.1973	10565.8	0.0231	10565.8	0.000870378	10565.8	-0.000248061
10557.8	-0.000242358	10557.8	-0.000358755	10557.8	0.00124773	10557.8	0.066	10557.8	0.000325992	10557.8	-0.000174127	10557.8	-0.0020919	10557.8	0.000322412	9327.49	0.422329	10557.8	0.1951	10557.8	0.0227	10557.8	0.000488535	10557.8	-0.000454232
10549.6	-3.82624e-05	10549.6	-0.000438849	10549.6	0.00108349	10549.6	0.0661	10549.6	0.000712374	10549.6	-0.000395097	10549.6	-0.00196803	10549.6	0	9313.24	0.414973	10549.6	0.1939	10549.6	0.0228	10549.6	0	10549.6	-0.000556778
10541.5	0.000166135	10541.5	-0.000518942	10541.5	0.00101925	10541.5	0.0663	10541.5	0.00109862	10541.5	-0.000416035	10541.5	-0.00184421	10541.5	-0.000335536	9299.04	0.40781	10541.5	0.1927	10541.5	0.023	10541.5	-0.000319074	10541.5	-0.000659782
10533.4	0.000270832	10533.4	-0.000999036	10533.4	0.000855001	10533.4	0.0663	10533.4	0.00118474	10533.4	-0.000536941	10533.4	-0.00182042	10533.4	-0.000392337	9284.96	0.400859	10533.4	0.1915	10533.4	0.023	10533.4	-0.000338148	10533.4	-0.000863242
10521.2	0.000277108	10521.2	-0.00202	10521.2	0.000508879	10521.2	0.0661	10521.2	0.00121425	10521.2	-0.000468383	10521.2	-0.00188464	10521.2	-0.000370565	9270.85	0.394014	10521.2	0.1897	10521.2	0.0228	10521.2	-0.00046963	10521.2	-0.00122
10503	0.000337794	10503	-0.00175	10503	0.000489697	10503	0.0659	10503	0.00190796	10503	-0.000515409	10503	-0.00133112	10503	-0.000379132	9256.77	0.387308	10503	0.1892	10503	0.0223	10503	-0.000716852	10503	-0.000350224
10484.8	0	10484.8	-0.00198	10484.8	0.000470514	10484.8	0.0655	10484.8	0.002001	10484.8	-0.000662273	10484.8	-0.00117779	10484.8	-0.000380948	9242.74	0.380731	10484.8	0.189	10484.8	0.0221	10484.8	-0.000764074	10484.8	0.000914506
10466.8	-0.000288428	10466.8	-0.000906932	10466.8	0.000950842	10466.8	0.066	10466.8	0.00289221	10466.8	-0.000508692	10466.8	-0.000724972	10466.8	-0.000427042	9228.84	0.374315	10466.8	0.1909	10466.8	0.0207	10466.8	-0.000805556	10466.8	-0.00133
10448.8	-0.000978144	10448.8	0.00086409	10448.8	0.00123166	10448.8	0.0661	10448.8	0.00398392	10448.8	-0.000755233	10448.8	0.000327991	10448.8	1.81359e-05	9214.89	0.367968	10448.8	0.1931	10448.8	0.019	10448.8	-0.000452778	10448.8	-0.00147
10430.8	-0.00107	10430.8	0.000835112	10430.8	0.00191248	10430.8	0.0664	10430.8	0.00397498	10430.8	-0.000733408	10430.8	0.00108077	10430.8	-6.45498e-05	9200.99	0.361694	10430.8	0.1997	10430.8	0.0178	10430.8	0	10430.8	-0.00121
10412.9	-0.000452529	10412.9	0.00121	10412.9	0.00259329	10412.9	0.0667	10412.9	0.00496537	10412.9	-0.00101	10412.9	0.00143337	10412.9	-4.82982e-05	9187.12	0.355429	10412.9	0.2069	10412.9	0.0159	10412.9	0.000218811	10412.9	-0.000953382
10395	0.000362785	10395	0.00128	10395	0.00317411	10395	0.0667	10395	0.00575512	10395	-0.000881197	10395	0.00148579	10395	0.000284056	9173.39	0.349153	10395	0.2185	10395	0.0152	10395	0.000637621	10395	0
10377.2	0.00057976	10377.2	0.000348177	10377.2	0.00325493	10377.2	0.0665	10377.2	0.00524421	10377.2	-0.00135	10377.2	0.00143803	10377.2	7.08366e-05	9159.61	0.342749	10377.2	0.2322	10377.2	0.0146	10377.2	0.00125643	10377.2	0.000901249
10359.6	-9.87024e-05	10359.6	-0.000282444	10359.6	0.00343526	10359.6	0.0666	10359.6	0.00543152	10359.6	-0.00103	10359.6	0.000889773	10359.6	0.000271268	9145.87	0.336237	10359.6	0.2508	10359.6	0.0158	10359.6	0.000881189	10359.6	0.000500597
10341.9	0.000221556	10341.9	0.000188577	10341.9	0.00311607	10341.9	0.0664	10341.9	0.00481933	10341.9	-0.000997389	10341.9	0.000241657	10341.9	-2.5098e-06	9132.25	0.329665	10341.9	0.2699	10341.9	0.0171	10341.9	0	10341.9	0.000300478
10324.3	0.000843449	10324.3	-0.000740401	10324.3	0.00319689	10324.3	0.0664	10324.3	0.0045065	10324.3	-0.000568629	10324.3	-0.000606636	10324.3	-0.000209344	9118.6	0.322988	10324.3	0.2908	10324.3	0.0191	10324.3	-3.34008e-05	10324.3	0.000499678
10306.7	0.000466968	10306.7	-0.000669379	10306.7	0.00277771	10306.7	0.0658	10306.7	0.00369303	10306.7	-0.000539286	10306.7	-0.000255105	10306.7	-0.000647339	9105.06	0.316353	10306.7	0.3116	10306.7	0.0195	10306.7	0.000633198	10306.7	-0.0002018
10289.3	-0.000505022	10289.3	0	10289.3	0.00225804	10289.3	0.0653	10289.3	0.0027778	10289.3	-0.000508334	10289.3	0.000295941	10289.3	-0.000234597	9091.49	0.309758	10289.3	0.3344	10289.3	0.0221	10289.3	0.0007	10289.3	0.00159
10271.9	-0.00138	10271.9	0.00074473	10271.9	0.00133885	10271.9	0.0649	10271.9	0.00216308	10271.9	-0.000677839	10271.9	-0.000352876	10271.9	-0.000839331	9077.95	0.303318	10271.9	0.3577	10271.9	0.0265	10271.9	0.000766599	10271.9	0.00199
10254.5	-0.00265	10254.5	-0.00041054	10254.5	0.000319672	10254.5	0.0638	10254.5	0.00154772	10254.5	-0.00044677	10254.5	-0.000601866	10254.5	-0.0014048	9064.54	0.297123	10254.5	0.3735	10254.5	0.0312	10254.5	0.000433198	10254.5	0.00269
10237.3	-0.00342	10237.3	-0.00247	10237.3	0	10237.3	0.0637	10237.3	0.00133063	10237.3	-0.000814111	10237.3	-0.000851336	10237.3	-0.00135564	9051.08	0.291129	10237.3	0.3843	10237.3	0.0333	10237.3	0	10237.3	0.00318
10220	-0.00239	10220	-0.00282	10220	-0.000555794	10220	0.0638	10220	0.00101403	10220	-0.000581907	10220	-0.000300669	10220	-0.00120509	9037.75	0.285414	10220	0.3912	10220	0.0339	10220	-1.21457e-05	10220	0.00388
10202.8	-0.00215	10202.8	-0.00138	10202.8	-0.000311587	10202.8	0.0632	10202.8	0.00199682	10202.8	-0.000749138	10202.8	-0.000650172	10202.8	-0.00125584	9024.37	0.279891	10202.8	0.3997	10202.8	0.0342	10202.8	-2.42915e-05	10202.8	0.00437
10185.8	-0.00252	10185.8	-0.00193	10185.8	-0.000167042	10185.8	0.0637	10185.8	0.00127789	10185.8	-0.000814798	10185.8	-0.00060015	10185.8	-0.00116701	9011.12	0.274605	10185.8	0.4078	10185.8	0.0335	10185.8	6.66667e-05	10185.8	0.00397
10168.7	-0.00348	10168.7	-0.00209	10168.7	-0.000622836	10168.7	0.0632	10168.7	0.000959457	10168.7	-0.00118	10168.7	5.0009e-05	10168.7	-0.00155966	8997.82	0.269484	10168.7	0.4174	10168.7	0.0324	10168.7	-4.54791e-05	10168.7	0.00306
10151.7	-0.00254	10151.7	-0.00124	10151.7	-0.000578629	10151.7	0.0638	10151.7	0.00124041	10151.7	-0.000946468	10151.7	0	10151.7	-0.00130288	8984.65	0.264584	10151.7	0.4329	10151.7	0.0316	10151.7	-0.000357625	10151.7	0.00295
10134.8	-0.0013	10134.8	-0.0014	10134.8	-0.000234085	10134.8	0.0639	10134.8	0.00151967	10134.8	-0.000810472	10134.8	-0.000220317	10134.8	-0.00157532	8971.43	0.259846	10134.8	0.4502	10134.8	0.0316	10134.8	-0.000566667	10134.8	0.00324
10117.9	-0.00126	10117.9	-0.00176	10117.9	-0.000489878	10117.9	0.0638	10117.9	0.00169943	10117.9	-0.000574927	10117.9	0.000358761	10117.9	-0.00124032	8958.33	0.255318	10117.9	0.4616	10117.9	0.033	10117.9	-0.000778812	10117.9	0.00213
10101	-0.00262	10101	-0.00131	10101	-0.000645672	10101	0.063	10101	0.000978582	10101	-0.000638834	10101	-6.14251e-05	10101	-0.0018954	8945.18	0.250934	10101	0.467	10101	0.0335	10101	-0.000490958	10101	0.00272
10084.3	-0.00287	10084.3	-0.00127	10084.3	-0.000201127	10084.3	0.0631	10084.3	0.000556059	10084.3	-0.000401207	10084.3	-0.00027955	10084.3	-0.00161545	8932.16	0.246721	10084.3	0.4679	10084.3	0.0333	10084.3	0	10084.3	0.00411
10067.6	-0.00192	10067.6	-0.00172	10067.6	-5.69206e-05	10067.6	0.0629	10067.6	0.00133403	10067.6	-0.000764029	10067.6	-0.000198279	10067.6	-0.00154155	8919.17	0.242615	10067.6	0.4691	10067.6	0.0332	10067.6	-0.000368085	10067.6	0.0026
10051	-0.00157	10051	-0.00138	10051	0.000287624	10051	0.0639	10051	0.00171033	10051	-0.000825329	10051	-0.000114963	10051	-0.00104183	8906.15	0.238562	10051	0.4711	10051	0.0324	10051	-0.000633333	10051	0.00149
10034.3	-0.00233	10034.3	-0.000133439	10034.3	0.00023183	10034.3	0.0633	10034.3	0.000887126	10034.3	-0.00119	10034.3	-0.000432249	10034.3	-0.0015392	8893.24	0.23459	10034.3	0.4702	10034.3	0.0308	10034.3	-0.00110142	10034.3	0.00128
10017.8	-0.00127	10017.8	0.000810414	10017.8	0.000176375	10017.8	0.0634	10017.8	0.00096227	10017.8	-0.000947315	10017.8	0.000452495	10017.8	-0.00150061	8880.36	0.230659	10017.8	0.4616	10017.8	0.0274	10017.8	-0.000966667	10017.8	0.00146
10001.3	-0.000621794	10001.3	-0.000344857	10001.3	0.000420582	10001.3	0.0637	10001.3	0.0013379	10001.3	-0.000907999	10001.3	0.00133664	10001.3	-0.00103237	8867.45	0.226747	10001.3	0.4512	10001.3	0.0223	10001.3	-0.000734752	10001.3	-0.000948347
9984.92	-0.000466247	9984.92	0.000298996	9984.92	0.00106513	9984.92	0.0642	9984.92	0.00113851	9984.92	-0.000767185	9984.92	0.00162279	9984.92	-0.000379434	8854.65	0.222917	9984.92	0.4364	9984.92	0.0189	9984.92	0	9984.92	-0.00166
9968.5	-0.00121	9968.5	-0.000456274	9968.5	0.00100933	9968.5	0.0647	9968.5	0.00119901	9968.5	-0.00103	9968.5	0.00140835	9968.5	-0.000402581	8841.89	0.219165	9968.5	0.4238	9968.5	0.0183	9968.5	0.000280851	9968.5	-0.000777473
9952.23	-0.00105	9952.23	-0.000812422	9952.23	0.000853877	9952.23	0.0645	9952.23	0.00085988	9952.23	-0.00088496	9952.23	0.000895907	9952.23	-0.000242964	8829.09	0.215484	9952.23	0.4132	9952.23	0.0199	9952.23	0.000566667	9952.23	-9.35064e-05
9935.91	-0.000396273	9935.91	-0.00127	9935.91	0.00159808	9935.91	0.0642	9935.91	0.000720641	9935.91	-0.000943549	9935.91	0.000682866	9935.91	-0.000909096	8816.4	0.211926	9935.91	0.4038	9935.91	0.021	9935.91	0.000747518	9935.91	-9.02328e-06
9919.75	-0.00133	9919.75	-0.00252	9919.75	0.00184263	9919.75	0.0639	9919.75	8.17676e-05	9919.75	-0.000500662	9919.75	0.00107181	9919.75	-0.000782531	8803.75	0.208466	9919.75	0.3946	9919.75	0.0233	9919.75	0.000633333	9919.75	0.000873743
9903.64	-0.000972179	9903.64	-0.000979987	9903.64	0.00178717	9903.64	0.0635	9903.64	-0.00025698	9903.64	-0.000357264	9903.64	0.000561434	9903.64	-0.00109465	8791.05	0.205067	9903.64	0.3882	9903.64	0.0251	9903.64	1.91489e-05	9903.64	5.59163e-05
9887.48	-0.00111	9887.48	-0.00174	9887.48	0.00203138	9887.48	0.0633	9887.48	-0.000995837	9887.48	-0.000514309	9887.48	0.000650466	9887.48	-0.00117564	8778.48	0.20175	9887.48	0.381	9887.48	0.0262	9887.48	0	9887.48	0.000638604
9871.47	-0.00115	9871.47	-0.00189	9871.47	0.00197592	9871.47	0.0628	9871.47	-0.000834333	9871.47	-0.000269895	9871.47	0.000241458	9871.47	-0.00115444	8765.93	0.198474	9871.47	0.375	9871.47	0.0266	9871.47	0.000675342	9871.47	0.000819594
9855.52	-0.00128	9855.52	-0.00165	9855.52	0.00212047	9855.52	0.063	9855.52	-0.000772705	9855.52	-0.000124978	9855.52	0.000633125	9855.52	-0.00145827	8753.42	0.195219	9855.52	0.3663	9855.52	0.0282	9855.52	0.000850685	9855.52	0
9839.52	-0.00171	9839.52	-0.0016	9839.52	0.00206468	9839.52	0.0635	9839.52	-0.000311185	9839.52	-0.000480502	9839.52	0.000624201	9839.52	-0.00118188	8740.95	0.191977	9839.52	0.3562	9839.52	0.0291	9839.52	0.000424658	9839.52	0.000396902
9823.67	-0.00134	9823.67	-0.00156	9823.67	0.00210922	9823.67	0.0637	9823.67	-0.000949309	9823.67	-0.000134583	9823.67	0.00111721	9823.67	-0.00144842	8728.52	0.188746	9823.67	0.3395	9823.67	0.0306	9823.67	0	9823.67	0.000191051
9807.86	-0.000771302	9807.86	-0.000815117	9807.86	0.00135376	9807.86	0.0633	9807.86	-0.00068731	9807.86	-0.000188169	9807.86	0.00121089	9807.86	-0.00145754	8716.04	0.185514	9807.86	0.3222	9807.86	0.0333	9807.86	-0.000299543	9807.86	-0.000915746
9792.02	-0.000101344	9792.02	0.000229613	9792.02	0.00139797	9792.02	0.0627	9792.02	-0.00102542	9792.02	-0.000142194	9792.02	0.00250398	9792.02	-0.00130185	8703.67	0.182332	9792.02	0.3025	9792.02	0.0388	9792.02	-0.000700913	9792.02	-0.00272
9776.32	-0.000327405	9776.32	-2.65342e-05	9776.32	0.00134252	9776.32	0.0621	9776.32	-0.00166318	9776.32	-0.000894792	9776.32	0.00259899	9776.32	-0.000511528	8691.34	0.179187	9776.32	0.28	9776.32	0.0481	9776.32	-0.000600457	9776.32	-0.00103
9760.67	0.000347898	9760.67	0.00102	9760.67	0.00118706	9760.67	0.0627	9760.67	-0.00120081	9760.67	-0.000946902	9760.67	0.00299465	9760.67	-0.000157328	8679.05	0.176077	9760.67	0.2588	9760.67	0.0623	9760.67	0	9760.67	-0.00174
9744.97	0.000621981	9744.97	0.00216	9744.97	0.00143127	9744.97	0.0618	9744.97	-0.00103856	9744.97	-0.000699449	9744.97	0.00278972	9744.97	-0.000155914	8666.79	0.173001	9744.97	0.2386	9744.97	0.0818	9744.97	0.000274886	9744.97	-0.00215
9729.42	0	9729.42	0.00201	9729.42	0.00147581	9729.42	0.0621	9729.42	-0.00157595	9729.42	-0.000650586	9729.42	0.00238669	9729.42	-0.000477112	8654.56	0.169955	9729.42	0.2216	9729.42	0.104	9729.42	-0.000450076	9729.42	-0.00306
9713.92	0.00108	9713.92	0.000949753	9713.92	0.00172036	9713.92	0.0613	9713.92	-0.000613229	9713.92	-0.000101242	9713.92	0.00338431	9713.92	0.000395236	8642.37	0.166932	9713.92	0.2068	9713.92	0.1248	9713.92	-0.000675038	9713.92	-0.00207
9698.47	0.00116	9698.47	0.00149	9698.47	0.0018649	9698.47	0.0612	9698.47	-0.00145039	9698.47	-0.000251418	9698.47	0.00248257	9698.47	0.000288581	8630.21	0.16394	9698.47	0.1937	9698.47	0.1412	9698.47	-0.0001	9698.47	-0.000185954
9683.07	0.00144	9683.07	0.000837459	9683.07	0.00100945	9683.07	0.0607	9683.07	-0.000787426	9683.07	-0.000101118	9683.07	0.00148147	9683.07	0.000520997	8618.09	0.161007	9683.07	0.1817	9683.07	0.1521	9683.07	0.000375038	9683.07	0.000299829
9667.63	-0.000677938	9667.63	0.000682189	9667.63	0.00185365	9667.63	0.0605	9667.63	-0.000924573	9667.63	0.000348749	9667.63	0.00217978	9667.63	0.000828636	8606	0.158166	9667.63	0.1721	9667.63	0.1583	9667.63	0.000349924	9667.63	-0.000213559
9652.32	-0.000592521	9652.32	0.00203	9652.32	0.0015982	9652.32	0.0611	9652.32	-0.00116138	9652.32	0	9652.32	0.00217996	9652.32	0.000926836	8593.94	0.155453	9652.32	0.1626	9652.32	0.1571	9652.32	0.000224962	9652.32	0.00057041
9637.07	0.000494522	9637.07	0.00161	9637.07	0.00204274	9637.07	0.0611	9637.07	-0.000798065	9637.07	-0.000597516	9637.07	0.00268077	9637.07	0.00074342	8581.92	0.152887	9637.07	0.155	9637.07	0.1487	9637.07	0	9637.07	0.000753482
9621.86	0.000683184	9621.86	0.0012	9621.86	0.00208729	9621.86	0.0612	9621.86	-0.00133464	9621.86	-0.000294408	9621.86	0.00278221	9621.86	0.000979718	8569.93	0.150476	9621.86	0.1479	9621.86	0.1385	9621.86	0.000866396	9621.86	0.00114
9606.7	0.000773458	9606.7	0.000594237	9606.7	0.00253183	9606.7	0.0602	9606.7	-0.000171095	9606.7	-9.06801e-05	9606.7	0.00218427	9606.7	0.00155605	8557.98	0.148219	9606.7	0.1424	9606.7	0.1263	9606.7	0.00143279	9606.7	0.00152
9591.59	0.000765335	9591.59	-0.000211894	9591.59	0.00267638	9591.59	0.0597	9591.59	-0.000507437	9591.59	0.000313665	9591.59	0.00208695	9591.59	0.00105253	8546.06	0.1461	9591.59	0.1363	9591.59	0.1157	9591.59	0.00159919	9591.59	0.000997354
9576.53	0.00126	9576.53	0.000481976	9576.53	0.00262092	9576.53	0.0606	9576.53	5.63345e-05	9576.53	0.000718625	9576.53	0.00199026	9576.53	0.00110011	8534.17	0.144092	9576.53	0.1315	9576.53	0.1049	9576.53	0.00106558	9576.53	0.000176878
9561.42	0.00235	9561.42	7.51978e-05	9561.42	0.00256513	9561.42	0.0613	9561.42	-0.00018	9561.42	0.00112	9561.42	0.000492985	9561.42	0.000585427	8522.32	0.142176	9561.42	0.1268	9561.42	0.0954	9561.42	0.000133604	9561.42	-0.000342779
9546.45	0.00235	9546.45	0.000169067	9546.45	0.00300967	9546.45	0.0608	9546.45	0.000483999	9546.45	0.000629198	9546.45	9.75242e-05	9546.45	0.000716165	8510.49	0.14034	9546.45	0.1234	9546.45	0.0883	9546.45	0	9546.45	-0.00026501
9531.53	0.000645673	9531.53	-0.000937063	9531.53	0.00265422	9531.53	0.0605	9531.53	-0.000451889	9531.53	0.000735988	9531.53	-0.000797325	9531.53	0.000449585	8498.7	0.138583	9531.53	0.1202	9531.53	0.0816	9531.53	0.0004	9531.53	-0.000388109
9516.65	0.00105	9516.65	-0.00144	9516.65	0.00209876	9516.65	0.0596	9516.65	-0.000587666	9516.65	0.000943381	9516.65	-0.000591567	9516.65	0.00056983	8486.95	0.136914	9516.65	0.1168	9516.65	0.0781	9516.65	0.0011	9516.65	-0.000512073
9501.82	0.00125	9501.82	-0.00135	9501.82	0.0018433	9501.82	0.0599	9501.82	-0.00022333	9501.82	0.000951375	9501.82	-0.0010852	9501.82	0.00101829	8475.29	0.135349	9501.82	0.113	9501.82	0.0754	9501.82	0.0014	9501.82	-0.000436897
9487.04	-5.02804e-05	9487.04	-0.000955455	9487.04	0.00108785	9487.04	0.0598	9487.04	-0.000158884	9487.04	0.000959966	9487.04	-0.00107824	9487.04	0.000607757	8463.6	0.133865	9487.04	0.1102	9487.04	0.0763	9487.04	0.0007	9487.04	-6.2577e-05
9472.3	0.000454167	9472.3	-0.000961586	9472.3	0.000632394	9472.3	0.0596	9472.3	5.67245e-06	9472.3	0.00107	9472.3	-0.00147067	9472.3	0.000545817	8451.94	0.132446	9472.3	0.1067	9472.3	0.0787	9472.3	0.0002	9472.3	0.000410891
9457.61	0.00106	9457.61	-0.00117	9457.61	0.000676939	9457.61	0.0595	9457.61	-2.9661e-05	9457.61	0.00128	9457.61	-0.000462507	9457.61	0.000681974	8440.31	0.131058	9457.61	0.1028	9457.61	0.0809	9457.61	0	9457.61	0.00018351
9442.96	0.00187	9442.96	-7.38467e-05	9442.96	-0.000478517	9442.96	0.0595	9442.96	-0.000264885	9442.96	0.00109	9442.96	-0.00045375	9442.96	0.000919763	8428.72	0.129667	9442.96	0.099	9442.96	0.084	9442.96	0.000393437	9442.96	-0.000944715
9428.36	0.00378	9428.36	2.00227e-05	9428.36	0.000166028	9428.36	0.059	9428.36	0	9428.36	0.0014	9428.36	0.000555599	9428.36	0.00206526	8417.23	0.128261	9428.36	0.0958	9428.36	0.0871	9428.36	0.00108687	9428.36	-7.3781e-05
9413.8	0.00399	9413.8	-0.000386108	9413.8	-8.94274e-05	9413.8	0.0592	9413.8	0.00122692	9413.8	0.00141	9413.8	0.000265536	9413.8	0.00165217	8405.69	0.126813	9413.8	0.0923	9413.8	0.0908	9413.8	0.00118031	9413.8	0.0016
9399.29	0.0047	9399.29	-0.000292238	9399.29	0.000555117	9399.29	0.0591	9399.29	5.37491e-05	9399.29	0.00152	9399.29	0.00037606	9399.29	0.00202713	8394.19	0.125335	9399.29	0.0893	9399.29	0.0924	9399.29	0.000673747	9399.29	0.00117
9384.91	0.00342	9384.91	-0.000597722	9384.91	0	9384.91	0.0589	9384.91	0.000680337	9384.91	0.00164	9384.91	0.000488316	9384.91	0.0026614	8382.79	0.123855	9384.91	0.0869	9384.91	0.0937	9384.91	-0.000141313	9384.91	0.000732384
9370.49	0.00233	9370.49	-0.000303852	9370.49	0.000103715	9370.49	0.0593	9370.49	0.00100701	9370.49	0.00095101	9370.49	0	9370.49	0.00316375	8371.35	0.122369	9370.49	0.0852	9370.49	0.0948	9370.49	-0.000247876	9370.49	0
9356.11	0.00135	9356.11	-0.000609983	9356.11	0.00010743	9356.11	0.0586	9356.11	0.00113359	9356.11	0.00126	9356.11	9.35593e-05	9356.11	0.00347717	8359.95	0.120881	9356.11	0.0837	9356.11	0.0965	9356.11	-0.000454439	9356.11	-0.00137
9341.78	0.000265455	9341.78	-0.000816114	9341.78	0.000511145	9341.78	0.0595	9341.78	0.0020601	9341.78	0.00128	9341.78	0.000187445	9341.78	0.00296433	8348.57	0.119385	9341.78	0.0821	9341.78	0.1007	9341.78	-0.000861002	9341.78	-0.000734925
9327.49	0.00098495	9327.49	-0.00152	9327.49	0.00051486	9327.49	0.0597	9327.49	0.00148652	9327.49	0.00149	9327.49	-0.000218345	9327.49	0.00353215	8337.29	0.117892	9327.49	0.0824	9327.49	0.1073	9327.49	-0.000967566	9327.49	-0.000203455
9313.24	0.00131	9313.24	-0.00163	9313.24	-0.000381425	9313.24	0.0589	9313.24	0.00221287	9313.24	0.00191	9313.24	-0.000123812	9313.24	0.00418279	8325.98	0.116387	9313.24	0.081	9313.24	0.1145	9313.24	-0.00137413	9313.24	0.00163
9299.04	-0.000671664	9299.04	-0.000834505	9299.04	0.00072229	9299.04	0.0597	9299.04	0.00183913	9299.04	0.00183	9299.04	-0.000628957	9299.04	0.00440522	8314.76	0.114903	9299.04	0.0801	9299.04	0.1243	9299.04	-0.00148069	9299.04	0.000957367
9284.96	0.000255113	9284.96	-0.000139989	9284.96	0.000225983	9284.96	0.0605	9284.96	0.00316515	9284.96	0.00194	9284.96	-0.00133314	9284.96	0.0045915	8303.51	0.113442	9284.96	0.0781	9284.96	0.1327	9284.96	-0.00169575	9284.96	0.00139
9270.85	8.04295e-05	9270.85	-0.00235	9270.85	0.000829698	9270.85	0.0607	9270.85	0.00269126	9270.85	0.00166	9270.85	-0.00223765	9270.85	0.00457986	8292.29	0.112033	9270.85	0.076	9270.85	0.1424	9270.85	-0.00200231	9270.85	0.000613995
9256.77	0.000107188	9256.77	-0.00155	9256.77	0.000133413	9256.77	0.0603	9256.77	0.00251728	9256.77	0.00148	9256.77	-0.00284184	9256.77	0.00439156	8281.16	0.110705	9256.77	0.0752	9256.77	0.1523	9256.77	-0.00200888	9256.77	-0.000358034
9242.74	0.00154	9242.74	-0.00236	9242.74	-6.28724e-05	9242.74	0.0602	9242.74	0.00354323	9242.74	0.0017	9242.74	-0.00304572	9242.74	0.00533155	8270	0.109453	9242.74	0.0744	9242.74	0.1591	9242.74	-0.00221544	9242.74	0.000469246
9228.84	0.000667866	9228.84	-0.00256	9228.84	-0.00015918	9228.84	0.0601	9228.84	0.00356894	9228.84	0.00132	9228.84	-0.00344865	9228.84	0.00558204	8258.93	0.108291	9228.84	0.0732	9228.84	0.1661	9228.84	-0.0024305	9228.84	0.00139
9214.89	0.0009989	9214.89	-0.00177	9214.89	-0.000655465	9214.89	0.0603	9214.89	0.00419473	9214.89	0.00194	9214.89	-0.0044519	9214.89	0.00634131	8247.83	0.107197	9214.89	0.0721	9214.89	0.1692	9214.89	-0.00173706	9214.89	0.00142
9200.99	0.000931349	9200.99	-0.00158	9200.99	0.00024825	9200.99	0.0604	9200.99	0.00522044	9200.99	0.00176	9200.99	-0.00385483	9200.99	0.00749299	8236.83	0.106177	9200.99	0.0716	9200.99	0.1717	9200.99	-0.00164363	9200.99	-0.000754401
9187.12	0.00247	9187.12	-0.000282255	9187.12	-0.000448035	9187.12	0.0602	9187.12	0.00644607	9187.12	0.00158	9187.12	-0.00375746	9187.12	0.00796688	8225.78	0.105203	9187.12	0.0718	9187.12	0.1665	9187.12	-0.00115019	9187.12	-0.00072985
9173.39	0.0016	9173.39	-0.000687739	9173.39	-0.00104434	9173.39	0.0604	9173.39	0.00797148	9173.39	0.0015	9173.39	-0.00225916	9173.39	0.00860216	8214.83	0.104268	9173.39	0.0725	9173.39	0.1566	9173.39	-0.000865251	9173.39	-0.00171
9159.61	0.00214	9159.61	-0.000193869	9159.61	-0.00144063	9159.61	0.0609	9159.61	0.010797	9159.61	0.00142	9159.61	-0.00116117	9159.61	0.00947018	8203.85	0.103349	9159.61	0.0726	9159.61	0.1409	9159.61	-0.000471814	9159.61	-0.00238
9145.87	0.00208	9145.87	0	9145.87	-0.00143691	9145.87	0.0608	9145.87	0.0134224	9145.87	0.00184	9145.87	-0.00136288	9145.87	0.00948528	8192.96	0.10246	9145.87	0.0724	9145.87	0.1234	9145.87	0.000121623	9145.87	-0.00246
9132.25	0.00352	9132.25	-5.12886e-05	9132.25	-0.00173322	9132.25	0.0605	9132.25	0.0166475	9132.25	0.00193	9132.25	-0.00136366	9132.25	0.0102938	8182.03	0.101599	9132.25	0.0732	9132.25	0.1003	9132.25	0.000106563	9132.25	-0.00404
9118.6	0.00376	9118.6	0.0012	9118.6	-0.00192951	9118.6	0.0606	9118.6	0.0210728	9118.6	0.00242	9118.6	3.52357e-05	9118.6	0.0104296	8171.2	0.100788	9118.6	0.0735	9118.6	0.0811	9118.6	0	9118.6	-0.00352
9105.06	0.00181	9105.06	0.00155	9105.06	-0.00132581	9105.06	0.0606	9105.06	0.0243978	9105.06	0.00141	9105.06	0.00103505	9105.06	0.0120115	8160.4	0.10003	9105.06	0.0744	9105.06	0.0623	9105.06	0.000593578	9105.06	-0.0035
9091.49	0.00275	9091.49	0.00159	9091.49	-0.0013221	9091.49	0.0613	9091.49	0.0268229	9091.49	0.0018	9091.49	0.00053455	9091.49	0.0138974	8149.56	0.0993238	9091.49	0.0757	9091.49	0.049	9091.49	0.0005	9091.49	-0.00328
9077.95	0.00329	9077.95	-0.000259228	9077.95	-0.00191838	9077.95	0.0609	9077.95	0.0273479	9077.95	0.000886015	9077.95	0.000234349	9077.95	0.0160025	8138.82	0.0986783	9077.95	0.0767	9077.95	0.0402	9077.95	0.000206422	9077.95	-0.00386
9064.54	0.00254	9064.54	0.000389484	9064.54	-0.00111469	9064.54	0.0615	9064.54	0.0279727	9064.54	0.000877995	9064.54	-0.000364946	9064.54	0.0183365	8128.1	0.0980931	9064.54	0.0784	9064.54	0.0356	9064.54	0	9064.54	-0.00404
9051.08	0.000490919	9051.08	-0.000262733	9051.08	-0.000710975	9051.08	0.0616	9051.08	0.0282976	9051.08	0.000569318	9051.08	-0.00126455	9051.08	0.0196134	8117.34	0.0975783	9051.08	0.0803	9051.08	0.0326	9051.08	-0.000720183	9051.08	-0.00413
9037.75	0.000942578	9037.75	-0.00151	9037.75	-0.000307283	9037.75	0.0623	9037.75	0.0284223	9037.75	0.00146	9037.75	-0.00256326	9037.75	0.0206463	8106.68	0.0971559	9037.75	0.0817	9037.75	0.0317	9037.75	-0.00195	9037.75	-0.00471
9024.37	0.00219	9024.37	-0.00107	9024.37	-0.000103568	9024.37	0.0618	9024.37	0.027947	9024.37	0.00116	9024.37	-0.00326228	9024.37	0.0228981	8096.05	0.0968371	9024.37	0.0829	9024.37	0.0301	9024.37	-0.00157018	9024.37	-0.00439
9011.12	0.000547116	9011.12	-0.00202	9011.12	-0.000199875	9011.12	0.0631	9011.12	0.0277715	9011.12	0.00175	9011.12	-0.00296041	9011.12	0.0239777	8085.38	0.0966305	9011.12	0.0841	9011.12	0.0295	9011.12	0	9011.12	-0.00388
8997.82	0	8997.82	-0.00157	8997.82	-9.61604e-05	8997.82	0.0627	8997.82	0.0275961	8997.82	0.00154	8997.82	-0.00335885	8997.82	0.0257903	8074.8	0.0965439	8997.82	0.0858	8997.82	0.0303	8997.82	0.000534517	8997.82	-0.00326
8984.65	-0.000422651	8984.65	-0.00212	8984.65	-0.000592468	8984.65	0.0634	8984.65	0.0282205	8984.65	0.00144	8984.65	-0.0040564	8984.65	0.0257687	8064.26	0.096571	8984.65	0.0877	8984.65	0.0302	8984.65	0.000761506	8984.65	-0.00185
8971.43	0.00025399	8971.43	-0.00317	8971.43	-0.000888753	8971.43	0.0625	8971.43	0.0271449	8971.43	0.00113	8971.43	-0.00405426	8971.43	0.0258248	8053.73	0.096698	8971.43	0.0894	8971.43	0.0295	8971.43	0.000596022	8971.43	-0.00124
8958.33	-0.000667357	8958.33	-0.00212	8958.33	-0.00188506	8958.33	0.0628	8958.33	0.0265691	8958.33	0.00133	8958.33	-0.00305124	8958.33	0.0261238	8043.18	0.0969091	8958.33	0.0917	8958.33	0.0289	8958.33	0.000623011	8958.33	-0.00132
8945.18	-0.00119	8945.18	-0.00178	8945.18	-0.00188135	8945.18	0.0628	8945.18	0.0238934	8945.18	0.000826908	8945.18	-0.00204853	8945.18	0.0255705	8032.71	0.0971834	8945.18	0.0934	8945.18	0.0288	8945.18	0.000657528	8945.18	8.90448e-05
8932.16	0.000290534	8932.16	-0.00143	8932.16	-0.00207765	8932.16	0.0632	8932.16	0.0212175	8932.16	0.000724924	8932.16	-0.00134495	8932.16	0.0256193	8022.27	0.0974989	8932.16	0.0959	8932.16	0.0285	8932.16	0.00118452	8932.16	0
8919.17	-0.000128881	8919.17	-0.00188	8919.17	-0.00247396	8919.17	0.0632	8919.17	0.0173415	8919.17	0.000423527	8919.17	-0.00034108	8919.17	0.0243949	8011.86	0.0978323	8919.17	0.0988	8919.17	0.0303	8919.17	0.00261151	8919.17	-0.000684072
8906.15	5.1001e-05	8906.15	-0.00223	8906.15	-0.00257025	8906.15	0.0637	8906.15	0.0134656	8906.15	-7.85156e-05	8906.15	-0.000437522	8906.15	0.0239523	8001.47	0.0981653	8906.15	0.1021	8906.15	0.0314	8906.15	0.00234602	8906.15	-0.00277
8893.24	0.000232861	8893.24	-0.00218	8893.24	-0.00246655	8893.24	0.0643	8893.24	0.0104895	8893.24	0.000221258	8893.24	0.000366904	8893.24	0.0235327	7991.11	0.0984897	8893.24	0.1043	8893.24	0.0342	8893.24	0.000873011	8893.24	-0.00125
8880.36	1.53526e-05	8880.36	-0.00103	8880.36	-0.00256286	8880.36	0.0636	8880.36	0.00781331	8880.36	-0.000878389	8880.36	0.000471605	8880.36	0.0226748	7980.72	0.0987985	8880.36	0.1064	8880.36	0.0353	8880.36	0	8880.36	-0.00134
8867.45	0.000597144	8867.45	0.000913657	8867.45	-0.00315915	8867.45	0.0637	8867.45	0.00553719	8867.45	-0.000578678	8867.45	0.000776001	8867.45	0.0220231	7970.41	0.0990827	8867.45	0.1095	8867.45	0.0386	8867.45	-2.57143e-05	8867.45	-0.000422309
8854.65	0.000180895	8854.65	0.00116	8854.65	-0.00205545	8854.65	0.0644	8854.65	0.00426086	8854.65	-0.000477169	8854.65	0.000881254	8854.65	0.021256	7960.14	0.0993464	8854.65	0.1122	8854.65	0.0387	8854.65	0.000137143	8854.65	9.19461e-05
8841.89	0.000165268	8841.89	0.00031108	8841.89	-0.00315176	8841.89	0.0646	8841.89	0.00248445	8841.89	-0.00108	8841.89	0.00108678	8841.89	0.0206002	7949.88	0.0996078	8841.89	0.1146	8841.89	0.0399	8841.89	0.0005	8841.89	0.000105872
8829.09	-0.000951055	8829.09	-0.000341137	8829.09	-0.00344805	8829.09	0.0643	8829.09	0.00240813	8829.09	-0.00117	8829.09	9.20017e-05	8829.09	0.0195538	7939.66	0.0998937	8829.09	0.1166	8829.09	0.0397	8829.09	0.000474286	8829.09	0.00122
8816.4	0.00103	8816.4	0.000107574	8816.4	-0.00344435	8816.4	0.0649	8816.4	0.00233159	8816.4	-0.00127	8816.4	0.000298073	8816.4	0.0182943	7929.46	0.100222	8816.4	0.119	8816.4	0.0388	8816.4	-0.000162857	8816.4	3.34353e-05
8803.75	0.00182	8803.75	0.000556286	8803.75	-0.00264066	8803.75	0.0651	8803.75	0.00225498	8803.75	-0.00016664	8803.75	0.00110441	8803.75	0.0180164	7919.29	0.100609	8803.75	0.1199	8803.75	0.0354	8803.75	-0.0007	8803.75	-5.36204e-05
8791.05	0.00171	8791.05	0.000704069	8791.05	-0.00223695	8791.05	0.0654	8791.05	0.00227845	8791.05	-0.00126	8791.05	0.00111045	8791.05	0.0173521	7909.14	0.101071	8791.05	0.121	8791.05	0.0326	8791.05	-0.000425714	8791.05	0.00166
8778.48	0.00149	8778.48	0.00105	8778.48	-0.00173325	8778.48	0.0656	8778.48	0.00190171	8778.48	-0.000858579	8778.48	0.00101733	8778.48	0.0164103	7899.02	0.101619	8778.48	0.1227	8778.48	0.029	8778.48	-0.000462857	8778.48	0.00227
8765.93	-0.000618147	8765.93	0.000801492	8765.93	-0.000529562	8765.93	0.0664	8765.93	0.00182491	8765.93	-0.00215	8765.93	0.000824471	8765.93	0.0151559	7888.92	0.102249	8765.93	0.1248	8765.93	0.0259	8765.93	0	8765.93	0.00328
8753.42	-0.000529477	8753.42	-0.000449797	8753.42	-0.00132587	8753.42	0.0672	8753.42	0.00164804	8753.42	-0.00141	8753.42	0.00073188	8753.42	0.0141905	7878.85	0.102951	8753.42	0.1254	8753.42	0.0231	8753.42	-0.000233992	8753.42	0.004
8740.95	0.000259795	8740.95	-0.000201086	8740.95	-0.00132218	8740.95	0.0671	8740.95	0.0014711	8740.95	-0.000712324	8740.95	0.00103955	8740.95	0.013434	7868.81	0.103694	8740.95	0.1269	8740.95	0.0203	8740.95	0.000132016	8740.95	0.00431
8728.52	-0.000250333	8728.52	-0.00135	8728.52	-0.000618485	8728.52	0.0669	8728.52	0.00229409	8728.52	-0.00112	8728.52	0.00134749	8728.52	0.0121173	7858.79	0.104443	8728.52	0.1279	8728.52	0.0176	8728.52	0.000198025	8728.52	0.00562
8716.04	-0.000361148	8716.04	-0.0012	8716.04	-0.00141477	8716.04	0.0669	8716.04	0.00171716	8716.04	-2.56676e-05	8716.04	0.000155122	8716.04	0.0113719	7848.8	0.105168	8716.04	0.1296	8716.04	0.0168	8716.04	0.000569959	8716.04	0.00663
8703.67	0.00123	8703.67	-0.00035588	8703.67	-0.00101108	8703.67	0.0676	8703.67	0.00204003	8703.67	-0.000232291	8703.67	0.00106358	8703.67	0.0087063	7838.9	0.105852	8703.67	0.1302	8703.67	0.014	8703.67	0.00133597	8703.67	0.00964
8691.34	2.15775e-05	8691.34	0.000392832	8691.34	-0.000407385	8691.34	0.0674	8691.34	0.00196283	8691.34	-0.000338895	8691.34	0.0005723	8691.34	0.00829865	7828.95	0.106492	8691.34	0.1307	8691.34	0.0134	8691.34	0.00160198	8691.34	0.01055
8679.05	0.000413826	8679.05	0.000341543	8679.05	-0.00100369	8679.05	0.068	8679.05	0.00171527	8679.05	-0.00034548	8679.05	0.00118128	8679.05	0.00756317	7819.04	0.107074	8679.05	0.1306	8679.05	0.012	8679.05	0.000967984	8679.05	0.01156
8666.79	-0.000393339	8666.79	-0.000609746	8666.79	0	8666.79	0.0684	8666.79	0.00253208	8666.79	-0.000852047	8666.79	0.00049051	8666.79	0.00722953	7809.14	0.107581	8666.79	0.1315	8666.79	0.0114	8666.79	0.000833992	8666.79	0.01217
8654.56	-0.000799919	8654.56	-0.000961034	8654.56	-0.00133947	8654.56	0.0696	8654.56	0.00154912	8654.56	-0.000658596	8654.56	0	8654.56	0.00627925	7799.28	0.108	8654.56	0.1321	8654.56	0.0115	8654.56	0	8654.56	0.01488
8642.37	-0.00131	8642.37	0.000187677	8642.37	-0.00167895	8642.37	0.0701	8642.37	0.0021664	8642.37	-0.00107	8642.37	0.000218148	8642.37	0.00585369	7789.44	0.108313	8642.37	0.133	8642.37	0.0109	8642.37	2.85714e-05	8642.37	0.01689
8630.21	-0.00121	8630.21	-6.36115e-05	8630.21	-0.00191842	8630.21	0.0713	8630.21	0.00128391	8630.21	-0.000671637	8630.21	3.56832e-05	8630.21	0.00601906	7779.68	0.108503	8630.21	0.1327	8630.21	0.0104	8630.21	0.000257143	8630.21	0.0204
8618.09	-0.00282	8618.09	-0.0005149	8618.09	-0.0016579	8618.09	0.0715	8618.09	0.00200165	8618.09	-0.00108	8618.09	0.000752607	8618.09	0.00605111	7769.89	0.10856	8618.09	0.1334	8618.09	0.0108	8618.09	0.000685714	8618.09	0.0243
8606	-0.000516948	8606	0.000433811	8606	-0.000897372	8606	0.0729	8606	0.00201962	8606	-0.000284606	8606	0.000268922	8606	0.00512136	7760.12	0.108484	8606	0.1338	8606	0.0104	8606	-8.57143e-05	8606	0.02791
8593.94	-1.60959e-05	8593.94	0.000282523	8593.94	-0.00203685	8593.94	0.0737	8593.94	0.00233782	8593.94	0.000408937	8593.94	-1.53693e-05	8593.94	0.00500849	7750.38	0.108283	8593.94	0.1339	8593.94	0.0099	8593.94	-0.00105714	8593.94	0.03022
8581.92	0.000185593	8581.92	3.12339e-05	8581.92	-0.00177632	8581.92	0.0748	8581.92	0.00215625	8581.92	0.000902499	8581.92	-0.000100264	8581.92	0.00445628	7740.72	0.107968	8581.92	0.1342	8581.92	0.0094	8581.92	-0.00122857	8581.92	0.03473
8569.93	-0.00251	8569.93	7.99453e-05	8569.93	-0.00201579	8569.93	0.0753	8569.93	0.00147491	8569.93	0.000796078	8569.93	-0.00168576	8569.93	0.00397503	7731.02	0.107549	8569.93	0.1337	8569.93	0.0095	8569.93	0	8569.93	0.03743
8557.98	-0.000508531	8557.98	-0.000171343	8557.98	-0.00135527	8557.98	0.0769	8557.98	0.0018938	8557.98	0.000589675	8557.98	-0.00187185	8557.98	0.00348595	7721.35	0.107043	8557.98	0.1333	8557.98	0.0099	8557.98	0.000613028	8557.98	0.04144
8546.06	-0.0021	8546.06	-0.00112	8546.06	-0.00189474	8546.06	0.0779	8546.06	0.00241291	8546.06	0.00068329	8546.06	-0.00265854	8546.06	0.00258516	7711.77	0.106465	8546.06	0.133	8546.06	0.012	8546.06	0.000726056	8546.06	0.04675
8534.17	-0.00039935	8534.17	-0.00127	8534.17	-0.00123422	8534.17	0.0779	8534.17	0.00203224	8534.17	0.00148	8534.17	-0.00504583	8534.17	0.0024017	7702.14	0.105804	8534.17	0.1336	8534.17	0.0137	8534.17	0.000339083	8534.17	0.05365
8522.32	-0.00119	8522.32	-0.00213	8522.32	-0.00147369	8522.32	0.0778	8522.32	0.0015518	8522.32	0.00157	8522.32	-0.0053337	8522.32	0.00150128	7692.54	0.105058	8522.32	0.1331	8522.32	0.0154	8522.32	-0.000147889	8522.32	0.06016
8510.49	-0.00369	8510.49	-0.00308	8510.49	-0.00251317	8510.49	0.0784	8510.49	0.00147159	8510.49	0.00086424	8510.49	-0.00512216	8510.49	0.000944181	7683.03	0.104242	8510.49	0.1328	8510.49	0.0164	8510.49	-0.000534861	8510.49	0.06606
8498.7	-0.00248	8498.7	-0.00303	8498.7	-0.00231974	8498.7	0.0786	8498.7	0.00139159	8498.7	0.000857926	8498.7	-0.00581121	8498.7	0.000628428	7673.48	0.103365	8498.7	0.1334	8498.7	0.0163	8498.7	-0.000721833	8498.7	0.07237
8486.95	-0.00317	8486.95	-0.00318	8486.95	-0.00231974	8486.95	0.0799	8486.95	0.00161182	8486.95	0.000951629	8486.95	-0.00590085	8486.95	2.61635e-05	7663.95	0.10245	8486.95	0.1333	8486.95	0.0161	8486.95	-0.000808805	8486.95	0.07837
8475.29	-0.00316	8475.29	-0.00273	8475.29	-0.00191974	8475.29	0.0804	8475.29	0.00183276	8475.29	0.00105	8475.29	-0.00659234	8475.29	1.15331e-05	7654.51	0.101525	8475.29	0.1326	8475.29	0.0163	8475.29	-0.00100199	8475.29	0.08778
8463.6	-0.00425	8463.6	-0.00348	8463.6	-0.00211974	8463.6	0.0807	8463.6	0.00195342	8463.6	0.000639125	8463.6	-0.00658313	8463.6	-0.000488066	7645.03	0.100604	8463.6	0.1325	8463.6	0.0156	8463.6	-0.00158896	8463.6	0.09688
8451.94	-0.00424	8451.94	-0.00363	8451.94	-0.00171974	8451.94	0.0815	8451.94	0.00177431	8451.94	0.00063288	8451.94	-0.0056745	8451.94	-0.000928162	7635.63	0.0997266	8451.94	0.1324	8451.94	0.0147	8451.94	-0.00187594	8451.94	0.10539
8440.31	-0.00403	8440.31	-0.00238	8440.31	-0.00151974	8440.31	0.0815	8440.31	0.00179541	8440.31	0.00123	8440.31	-0.00546644	8440.31	-0.00120909	7626.19	0.0989111	8440.31	0.1324	8440.31	0.0132	8440.31	-0.00176291	8440.31	0.11589
8428.72	-0.00442	8428.72	-0.00193	8428.72	-0.0013874	8428.72	0.0813	8428.72	0.00151673	8428.72	0.00142	8428.72	-0.00405895	8428.72	-0.00152761	7616.84	0.0981897	8428.72	0.1324	8428.72	0.0117	8428.72	-0.00144988	8428.72	0.12729
8417.23	-0.0049	8417.23	-0.00178	8417.23	-0.00178987	8417.23	0.081	8417.23	0.00103874	8417.23	0.00151	8417.23	-0.0033533	8417.23	-0.00170287	7607.46	0.0975629	8417.23	0.1316	8417.23	0.0113	8417.23	-0.000843068	8417.23	0.1361
8405.69	-0.00469	8405.69	-0.00224	8405.69	-0.00229297	8405.69	0.0818	8405.69	0.000260493	8405.69	0.00171	8405.69	-0.00304694	8405.69	-0.0013838	7598.15	0.0970357	8405.69	0.133	8405.69	0.0106	8405.69	-0.00083004	8405.69	0.1436
8394.19	-0.00417	8394.19	-0.00159	8394.19	-0.00189607	8394.19	0.0815	8394.19	0.000382456	8394.19	0.0016	8394.19	-0.00274115	8394.19	-0.000880322	7588.81	0.0966017	8394.19	0.1332	8394.19	0.0105	8394.19	-0.000217012	8394.19	0.1491
8382.79	-0.00339	8382.79	-0.00134	8382.79	-0.00149854	8382.79	0.0821	8382.79	0.000405109	8382.79	0.002	8382.79	-0.00293718	8382.79	-0.00176816	7579.55	0.0962754	8382.79	0.1329	8382.79	0.0098	8382.79	-1.01996e-05	8382.79	0.1527
8371.35	-0.00246	8371.35	0.000210823	8371.35	-0.00250164	8371.35	0.0828	8371.35	2.74957e-05	8371.35	0.00199	8371.35	-0.00183251	8371.35	-0.00208733	7570.31	0.096071	8371.35	0.1336	8371.35	0.0098	8371.35	-0.000197172	8371.35	0.15391
8359.95	-0.00262	8359.95	0.00176	8359.95	-0.00140474	8359.95	0.0841	8359.95	0.00115009	8359.95	0.00128	8359.95	-0.00152839	8359.95	-0.00232718	7561.04	0.095992	8359.95	0.1343	8359.95	0.0094	8359.95	-0.000484144	8359.95	0.15591
8348.57	-0.00158	8348.57	0.00191	8348.57	-0.00170784	8348.57	0.0847	8348.57	-2.70964e-05	8348.57	0.000977513	8348.57	-0.00172483	8348.57	-0.00214823	7551.84	0.0960224	8348.57	0.1344	8348.57	0.009	8348.57	-0.00137112	8348.57	0.15401
8337.29	-0.000336501	8337.29	0.000857885	8337.29	-0.00201031	8337.29	0.0848	8337.29	0.000896394	8337.29	0.00107	8337.29	-0.00212307	8337.29	-0.00154635	7542.62	0.0961365	8337.29	0.1336	8337.29	0.0084	8337.29	-0.0025643	8337.29	0.15261
8325.98	0.000204515	8325.98	0.000106597	8325.98	-0.00231341	8325.98	0.0851	8325.98	0.000519621	8325.98	0.000965413	8325.98	-0.00162062	8325.98	-0.00221719	7533.47	0.0963104	8325.98	0.1326	8325.98	0.008	8325.98	-0.00285128	8325.98	0.15061
8314.76	-0.00145	8314.76	0.00166	8314.76	-0.00241588	8314.76	0.0862	8314.76	0.000973484	8314.76	0.000359406	8314.76	-0.00191994	8314.76	-0.00297907	7524.34	0.0965281	8314.76	0.1318	8314.76	0.0079	8314.76	-0.00373466	8314.76	0.14931
8303.51	-0.00241	8303.51	0.001	8303.51	-0.00171898	8303.51	0.0861	8303.51	0.000973484	8303.51	0.000653379	8303.51	-0.00121858	8303.51	-0.00301432	7515.18	0.0967859	8303.51	0.1327	8303.51	0.0091	8303.51	-0.0039093	8303.51	0.14811
8292.29	-6.44321e-05	8292.29	0.00155	8292.29	-0.00222209	8292.29	0.086	8292.29	0.00177348	8292.29	0.00125	8292.29	-0.00151776	8292.29	-0.00387262	7506.1	0.0970925	8292.29	0.1324	8292.29	0.0079	8292.29	-0.00368394	8292.29	0.14801
8281.16	-0.000917377	8281.16	0.0022	8281.16	-0.00182455	8281.16	0.0869	8281.16	0.000973484	8281.16	0.000441409	8281.16	-0.000918704	8281.16	-0.00381964	7497.04	0.0974686	8281.16	0.1327	8281.16	0.0083	8281.16	-0.00256733	8281.16	0.14831
8270	-0.000371547	8270	0.00135	8270	-0.00182766	8270	0.087	8270	0.000873484	8270	0.00124	8270	-0.00111896	8270	-0.00359096	7488	0.0979321	8270	0.1304	8270	0.0085	8270	-0.00154197	8270	0.14771
8258.93	-0.00102	8258.93	0.0016	8258.93	-0.00223013	8258.93	0.0864	8258.93	0.00107348	8258.93	0.000629504	8258.93	-0.000220976	8258.93	-0.00327585	7478.93	0.0984901	8258.93	0.1295	8258.93	0.0089	8258.93	-0.000725358	8258.93	0.14701
8247.83	-0.000774871	8247.83	0.00155	8247.83	-0.00233323	8247.83	0.088	8247.83	0.00197348	8247.83	0.000723557	8247.83	-0.000222304	8247.83	-0.00347174	7469.93	0.0991313	8247.83	0.1276	8247.83	0.0084	8247.83	0	8247.83	0.14471
8236.83	-0.00222	8236.83	0	8236.83	-0.0029357	8236.83	0.0879	8236.83	0.00167348	8236.83	0.000917662	8236.83	0.000174621	8236.83	-0.00353995	7460.96	0.0998577	8236.83	0.126	8236.83	0.0077	8236.83	-0.00090154	8236.83	0.14171
8225.78	-0.00217	8225.78	-0.000164649	8225.78	-0.0012751	8225.78	0.0897	8225.78	0.00207348	8225.78	0.000511747	8225.78	7.22326e-05	8225.78	-0.00361411	7452.01	0.100682	8225.78	0.1246	8225.78	0.0087	8225.78	-0.00169877	8225.78	0.13791
8214.83	-0.00362	8214.83	-0.000525835	8214.83	-0.00218347	8214.83	0.0916	8214.83	0.00167348	8214.83	0.000505884	8214.83	-0.000231893	8214.83	-0.00363664	7443.02	0.101637	8214.83	0.1244	8214.83	0.0088	8214.83	-0.00110031	8214.83	0.1326
8203.85	-0.00467	8203.85	0.000409516	8203.85	-0.00109004	8203.85	0.094	8203.85	0.00217348	8203.85	0	8203.85	-0.000135335	8203.85	-0.00330867	7434.12	0.10275	8203.85	0.1239	8203.85	0.0093	8203.85	-0.000797536	8203.85	0.1278
8192.96	-0.00562	8192.96	0.00125	8192.96	-0.00119841	8192.96	0.095	8192.96	0.00307348	8192.96	0.000620921	8192.96	-0.000140503	8192.96	-0.00390733	7425.23	0.104071	8192.96	0.1226	8192.96	0.0095	8192.96	-0.000699076	8192.96	0.1227
8182.03	-0.00676	8182.03	0.000783681	8182.03	-0.00130498	8182.03	0.0947	8182.03	0.00267348	8182.03	0.000642264	8182.03	-0.00034499	8182.03	-0.00307773	7416.36	0.105634	8182.03	0.1202	8182.03	0.0094	8182.03	-0.000996304	8182.03	0.1176
8171.2	-0.00441	8171.2	0.00172	8171.2	0.000186656	8171.2	0.0964	8171.2	0.00407348	8171.2	0.00106	8171.2	-0.00125119	8171.2	-0.00233863	7407.52	0.107437	8171.2	0.119	8171.2	0.0092	8171.2	-0.00149784	8171.2	0.11329
8160.4	-0.00615	8160.4	0.00186	8160.4	-0.000521713	8160.4	0.098	8160.4	0.00377348	8160.4	0.000282503	8160.4	-0.00135791	8160.4	-0.00291625	7398.69	0.109462	8160.4	0.1175	8160.4	0.0093	8160.4	-0.00139938	8160.4	0.10889
8149.56	-0.00649	8149.56	0.0015	8149.56	-0.000128281	8149.56	0.0993	8149.56	0.00457348	8149.56	0.0017	8149.56	-0.00226394	8149.56	-0.0036018	7389.89	0.111675	8149.56	0.1162	8149.56	0.0096	8149.56	-0.00129661	8149.56	0.10749
8138.82	-0.00383	8138.82	0.00314	8138.82	-0.00063665	8138.82	0.0996	8138.82	0.00497348	8138.82	0.00122	8138.82	-0.00247168	8138.82	-0.00385809	7381.11	0.11403	8138.82	0.1141	8138.82	0.0095	8138.82	-0.000298152	8138.82	0.10668
8128.1	-0.00607	8128.1	0.00177	8128.1	-0.000345019	8128.1	0.0999	8128.1	0.00547348	8128.1	0.00194	8128.1	-0.00167992	8128.1	-0.00316722	7372.35	0.116482	8128.1	0.1124	8128.1	0.0088	8128.1	0.000500308	8128.1	0.10698
8117.34	-0.00491	8117.34	-9.03589e-05	8117.34	-0.00105159	8117.34	0.1025	8117.34	0.00557348	8117.34	0.00146	8117.34	-0.00108749	8117.34	-0.00239073	7363.61	0.118979	8117.34	0.1108	8117.34	0.0086	8117.34	0.00080308	8117.34	0.10917
8106.68	-0.00465	8106.68	-0.000151544	8106.68	-0.000459956	8106.68	0.1029	8106.68	0.00607348	8106.68	0.00188	8106.68	-9.67426e-05	8106.68	-0.00286046	7354.89	0.121474	8106.68	0.1094	8106.68	0.0077	8106.68	0.00050154	8106.68	0.10867
8096.05	-0.00479	8096.05	0.00078727	8096.05	-0.000868325	8096.05	0.1032	8096.05	0.00687348	8096.05	0.0021	8096.05	-0.000506495	8096.05	-0.00330324	7346.19	0.123922	8096.05	0.1077	8096.05	0.0079	8096.05	0	8096.05	0.10826
8085.38	-0.00153	8085.38	0.00232	8085.38	-0.000774894	8085.38	0.1054	8085.38	0.00807348	8085.38	0.00192	8085.38	-0.000315577	8085.38	-0.00323916	7337.51	0.126291	8085.38	0.1065	8085.38	0.0072	8085.38	-0.00070857	8085.38	0.10876
8074.8	-0.00136	8074.8	0.00316	8074.8	-0.000683262	8074.8	0.1068	8074.8	0.00887348	8074.8	0.00233	8074.8	7.36723e-05	8074.8	-0.00295065	7328.85	0.128572	8074.8	0.1046	8074.8	0.0068	8074.8	-0.000718927	8074.8	0.10685
8064.26	-0.0014	8064.26	0.00020025	8064.26	-0.000491631	8064.26	0.1079	8064.26	0.00887348	8064.26	0.00165	8064.26	0.000462427	8064.26	-0.00313151	7320.22	0.130778	8064.26	0.1031	8064.26	0.0065	8064.26	-0.000929285	8064.26	0.10485
8053.73	-0.000332933	8053.73	-0.000460935	8053.73	0	8053.73	0.1103	8053.73	0.0106735	8053.73	0.00187	8053.73	0.00105069	8053.73	-0.0016204	7311.6	0.132951	8053.73	0.1023	8053.73	0.0064	8053.73	-0.000739642	8053.73	0.09924
8043.18	0.000632071	8043.18	-0.000825584	8043.18	0.000648411	8043.18	0.1106	8043.18	0.0123735	8043.18	0.00188	8043.18	0.000839619	8043.18	-0.00186575	7303	0.135137	8043.18	0.1015	8043.18	0.0061	8043.18	0.000351788	8043.18	0.09494
8032.71	0	8032.71	-0.00078677	8032.71	-0.000601021	8032.71	0.1112	8032.71	0.0144735	8032.71	0.0017	8032.71	0.000426899	8032.71	-0.00190834	7294.42	0.137382	8032.71	0.1006	8032.71	0.0062	8032.71	0.00084143	8032.71	0.08963
8022.27	-1.68966e-05	8022.27	-0.000147955	8022.27	-0.000550453	8022.27	0.113	8022.27	0.0166735	8022.27	0.00202	8022.27	-0.000386308	8022.27	-0.000836543	7285.87	0.139728	8022.27	0.1003	8022.27	0.0071	8022.27	0.000731073	8022.27	0.08712
8011.86	0.000367029	8011.86	-0.00050914	8011.86	-0.00109989	8011.86	0.1138	8011.86	0.0200735	8011.86	0.00203	8011.86	0	8011.86	-0.00138107	7277.33	0.142204	8011.86	0.0988	8011.86	0.0068	8011.86	0.00132072	8011.86	0.08372
8001.47	-0.000548225	8001.47	0.00113	8001.47	-0.00114932	8001.47	0.1171	8001.47	0.0254735	8001.47	0.00165	8001.47	-0.000241921	8001.47	-0.0018621	7268.82	0.144838	8001.47	0.0982	8001.47	0.0071	8001.47	0.00151036	8001.47	0.08081
7991.11	0.00134	7991.11	-0.000431511	7991.11	-0.00169875	7991.11	0.1193	7991.11	0.0297735	7991.11	0.00206	7991.11	0.000115748	7991.11	-0.000383504	7260.37	0.147638	7991.11	0.0978	7991.11	0.0065	7991.11	0	7991.11	0.0778
7980.72	0.000921778	7980.72	0.00010384	7980.72	-0.00125034	7980.72	0.1197	7980.72	0.0343735	7980.72	0.00258	7980.72	-0.000326021	7980.72	-0.000120222	7251.89	0.15067	7980.72	0.0969	7980.72	0.0066	7980.72	5.15167e-05	7980.72	0.07569
7970.41	0.00301	7970.41	-0.000457346	7970.41	-0.00149977	7970.41	0.1216	7970.41	0.0395735	7970.41	0.00229	7970.41	-0.00126917	7970.41	0.00034452	7243.44	0.153956	7970.41	0.0961	7970.41	0.006	7970.41	0.000592288	7970.41	0.07489
7960.14	0.0031	7960.14	-0.00152	7960.14	-0.000849203	7960.14	0.122	7960.14	0.0445735	7960.14	0.00201	7960.14	-0.00271272	7960.14	0.00164638	7235	0.157548	7960.14	0.0958	7960.14	0.0083	7960.14	0.000233059	7960.14	0.07348
7949.88	0.000585764	7949.88	-0.00118	7949.88	-0.00189864	7949.88	0.1238	7949.88	0.0481735	7949.88	0.00182	7949.88	-0.00405667	7949.88	0.00146731	7226.58	0.161496	7949.88	0.0949	7949.88	0.0103	7949.88	-0.00132617	7949.88	0.07017
7939.66	0.00298	7939.66	-0.00144	7939.66	-0.00134807	7939.66	0.1259	7939.66	0.0519735	7939.66	0.00143	7939.66	-0.00540103	7939.66	0.0021626	7218.24	0.16581	7939.66	0.0932	7939.66	0.0123	7939.66	-0.0027854	7939.66	0.07026
7929.46	0.00317	7929.46	-0.0022	7929.46	-0.0013975	7929.46	0.1302	7929.46	0.0539735	7929.46	0.00165	7929.46	-0.00624579	7929.46	0.002406	7209.86	0.170595	7929.46	0.092	7929.46	0.0129	7929.46	-0.00354463	7929.46	0.06915
7919.29	0.00136	7919.29	-0.00226	7919.29	-0.00234693	7919.29	0.1309	7919.29	0.0549735	7919.29	0.00176	7919.29	-0.00629094	7919.29	0.0032571	7201.5	0.175862	7919.29	0.0918	7919.29	0.0127	7919.29	-0.00410386	7919.29	0.06764
7909.14	0.00105	7909.14	-0.00252	7909.14	-0.00172187	7909.14	0.1302	7909.14	0.0553735	7909.14	0.00197	7909.14	-0.00683649	7909.14	0.00438426	7193.21	0.181591	7909.14	0.0915	7909.14	0.0132	7909.14	-0.00416308	7909.14	0.06793
7899.02	0.000941711	7899.02	-0.00369	7899.02	-0.00101911	7899.02	0.1312	7899.02	0.0555735	7899.02	0.00239	7899.02	-0.00728244	7899.02	0.00518413	7184.89	0.18784	7899.02	0.092	7899.02	0.0124	7899.02	-0.00332231	7899.02	0.06752
7888.92	0.00274	7888.92	-0.00385	7888.92	-0.000916353	7888.92	0.1326	7888.92	0.0544735	7888.92	0.0024	7888.92	-0.00672878	7888.92	0.00702849	7176.59	0.194508	7888.92	0.091	7888.92	0.0109	7888.92	-0.00258154	7888.92	0.06811
7878.85	0.00273	7878.85	-0.00361	7878.85	-0.000313595	7878.85	0.1336	7878.85	0.0537735	7878.85	0.00201	7878.85	-0.00587551	7878.85	0.00852383	7168.36	0.201437	7878.85	0.0912	7878.85	0.009	7878.85	-0.00174077	7878.85	0.0697
7868.81	0.00362	7868.81	-0.00217	7868.81	-1.08362e-05	7868.81	0.1362	7868.81	0.0527735	7868.81	0.00272	7868.81	-0.00552263	7868.81	0.0103702	7160.09	0.2086	7868.81	0.0917	7868.81	0.0072	7868.81	0	7868.81	0.07159
7858.79	0.00392	7858.79	-0.00293	7858.79	-0.000208078	7858.79	0.1372	7858.79	0.0511735	7858.79	0.00213	7858.79	-0.00397015	7858.79	0.0129053	7151.85	0.215841	7858.79	0.0918	7858.79	0.0053	7858.79	-0.0010512	7858.79	0.07348
7848.8	0.00382	7848.8	-0.00189	7848.8	-0.000505319	7848.8	0.138	7848.8	0.0481735	7848.8	0.00194	7848.8	-0.00331805	7848.8	0.0155385	7143.67	0.222994	7848.8	0.0918	7848.8	0.0042	7848.8	-0.00180239	7848.8	0.07477
7838.9	0.00262	7838.9	-0.00014929	7838.9	-0.000706282	7838.9	0.1392	7838.9	0.0458735	7838.9	0.00135	7838.9	-0.00246727	7838.9	0.0178098	7135.47	0.230014	7838.9	0.093	7838.9	0.0044	7838.9	-0.00204402	7838.9	0.07766
7828.95	0.00311	7828.95	0.00119	7828.95	-0.000303523	7828.95	0.1407	7828.95	0.0440735	7828.95	0.00126	7828.95	-0.00241594	7828.95	0.0204697	7127.33	0.236641	7828.95	0.0936	7828.95	0.003	7828.95	-0.00139521	7828.95	0.08065
7819.04	0.00281	7819.04	-0.000471661	7819.04	-0.000100765	7819.04	0.1404	7819.04	0.0422735	7819.04	0.000973426	7819.04	-0.00176499	7819.04	0.0223713	7119.16	0.242761	7819.04	0.0946	7819.04	0.0038	7819.04	-0.000946409	7819.04	0.08204
7809.14	0.00431	7809.14	-0.00163	7809.14	0.000601994	7809.14	0.1396	7809.14	0.0413735	7809.14	7.6002e-05	7809.14	-0.00171442	7809.14	0.0263829	7111.06	0.248105	7809.14	0.0953	7809.14	0.0041	7809.14	-0.000397606	7809.14	0.08073
7799.28	0.00371	7799.28	-0.00199	7799.28	0.00150475	7799.28	0.1417	7799.28	0.0381735	7799.28	-0.00018678	7799.28	-0.00176424	7799.28	0.0282736	7102.93	0.252567	7799.28	0.0962	7799.28	0.0054	7799.28	0.000451197	7799.28	0.08071
7789.44	0.00172	7789.44	-0.00156	7789.44	0.00120751	7789.44	0.1428	7789.44	0.0360735	7789.44	0.000349586	7789.44	-0.00261443	7789.44	0.0305101	7094.87	0.255981	7789.44	0.0973	7789.44	0.0047	7789.44	0	7789.44	0.0776
7779.68	0.00282	7779.68	0.00129	7779.68	0.00171911	7779.68	0.143	7779.68	0.0327735	7779.68	-1.69639e-05	7779.68	-0.00216592	7779.68	0.0327628	7086.77	0.258326	7779.68	0.0994	7779.68	0.0052	7779.68	-0.000231002	7779.68	0.07629
7769.89	0.00252	7769.89	0.00123	7769.89	0.000955537	7769.89	0.1441	7769.89	0.0282735	7769.89	-0.000482285	7769.89	-0.00271687	7769.89	0.0353137	7078.74	0.259551	7769.89	0.1013	7769.89	0.0058	7769.89	3.96658e-05	7769.89	0.07098
7760.12	0.00203	7760.12	0.000264691	7760.12	0.00109197	7760.12	0.147	7760.12	0.0244735	7760.12	-4.84471e-05	7760.12	-0.00216819	7760.12	0.038576	7070.69	0.259666	7760.12	0.104	7760.12	0.0056	7760.12	0.000610334	7760.12	0.06546
7750.38	0.000729516	7750.38	-0.000896494	7750.38	0.0010284	7750.38	0.1467	7750.38	0.0194735	7750.38	-0.000915448	7750.38	-0.00171988	7750.38	0.0420765	7062.7	0.258717	7750.38	0.1069	7750.38	0.0048	7750.38	0.000481002	7750.38	0.06205
7740.72	0.00414	7740.72	-0.000754215	7740.72	0.0016646	7740.72	0.1499	7740.72	0.0160735	7740.72	-0.000185331	7740.72	-0.00147286	7740.72	0.046635	7054.72	0.256785	7740.72	0.1097	7740.72	0.0057	7740.72	-0.00085	7740.72	0.05664
7731.02	0.00304	7731.02	-0.000715401	7731.02	0.00240103	7731.02	0.1497	7731.02	0.0122735	7731.02	-0.00135	7731.02	-0.00172529	7731.02	0.0512037	7046.72	0.253939	7731.02	0.1136	7731.02	0.0046	7731.02	-0.00167933	7731.02	0.05252
7721.35	0.00225	7721.35	0.00182	7721.35	0.00143746	7721.35	0.1507	7721.35	0.00967348	7721.35	7.65145e-05	7721.35	-0.00167809	7721.35	0.0579181	7038.78	0.250318	7721.35	0.1181	7721.35	0.006	7721.35	-0.00170866	7721.35	0.04931
7711.77	0.00126	7711.77	0.000665693	7711.77	0.00187366	7711.77	0.1521	7711.77	0.00727348	7711.77	-0.000395835	7711.77	-0.00333217	7711.77	0.0607918	7030.87	0.245995	7711.77	0.1222	7711.77	0.0052	7711.77	-0.00203967	7711.77	0.04499
7702.14	0.00147	7702.14	-0.0011	7702.14	0.00181009	7702.14	0.1529	7702.14	0.00507348	7702.14	-0.00046697	7702.14	-0.0020857	7702.14	0.0676063	7022.92	0.241029	7702.14	0.1278	7702.14	0.0059	7702.14	-0.001869	7702.14	0.04268
7692.54	0.00227	7692.54	-0.000456678	7692.54	0.00204652	7692.54	0.1534	7692.54	0.00447348	7692.54	-0.000338925	7692.54	-0.0014396	7692.54	0.0700919	7015.03	0.235606	7692.54	0.1336	7692.54	0.0057	7692.54	-0.00139833	7692.54	0.04057
7683.03	0.00209	7683.03	0.00109	7683.03	0.00208273	7683.03	0.1517	7683.03	0.00447348	7683.03	-0.000413714	7683.03	-0.00159477	7683.03	0.0741311	7007.17	0.229817	7683.03	0.1397	7683.03	0.0065	7683.03	-0.00122933	7683.03	0.03725
7673.48	0.003	7673.48	0.00152	7673.48	0.00171916	7673.48	0.1554	7673.48	0.00387348	7673.48	-0.000487294	7673.48	-0.00174939	7673.48	0.0765879	6999.27	0.223716	7673.48	0.1478	7673.48	0.0067	7673.48	-0.000658663	7673.48	0.03444
7663.95	0.00121	7663.95	0.00146	7663.95	0.00105558	7663.95	0.1572	7663.95	0.00327348	7663.95	-0.000461684	7663.95	-0.000304374	7663.95	0.0773255	6991.44	0.21745	7663.95	0.1549	7663.95	0.0068	7663.95	-0.000287995	7663.95	0.03232
7654.51	0.00202	7654.51	0.00171	7654.51	0.00169179	7654.51	0.1585	7654.51	0.00187348	7654.51	-0.000638884	7654.51	-0.00116061	7654.51	0.078486	6983.63	0.211075	7654.51	0.1654	7654.51	0.0067	7654.51	0.000481002	7654.51	0.03061
7645.03	0.00154	7645.03	-0.000155676	7645.03	0.000928218	7645.03	0.1597	7645.03	0.00157348	7645.03	-0.000514882	7645.03	-0.00071631	7645.03	0.0758072	6975.84	0.20471	7645.03	0.175	7645.03	0.0069	7645.03	0.000851671	7645.03	0.03009
7635.63	0.000706744	7635.63	0.000186603	7635.63	0.00116442	7635.63	0.1588	7635.63	0.00237348	7635.63	-0.000393673	7635.63	-0.00207325	7635.63	0.0740627	6968.06	0.198466	7635.63	0.1847	7635.63	0.0064	7635.63	0.000220668	7635.63	0.02817
7626.19	0.00107	7626.19	-0.000174583	7626.19	0.000400852	7626.19	0.1603	7626.19	0.000773484	7626.19	-0.00117	7626.19	-0.00182967	7626.19	0.0705842	6960.25	0.192389	7626.19	0.1978	7626.19	0.007	7626.19	-0.00120866	7626.19	0.02696
7616.84	-0.00117	7616.84	-0.00193	7616.84	3.70563e-05	7616.84	0.1604	7616.84	0.00117348	7616.84	-0.000451637	7616.84	-0.00188731	7616.84	0.0689734	6952.51	0.186579	7616.84	0.2124	7616.84	0.0078	7616.84	-0.000639666	7616.84	0.02664
7607.46	0.000195518	7607.46	-0.00329	7607.46	0.000473486	7607.46	0.1635	7607.46	0.000173484	7607.46	-0.000530813	7607.46	-0.00134443	7607.46	0.0656204	6944.78	0.181014	7607.46	0.2263	7607.46	0.0079	7607.46	-0.000268998	7607.46	0.02563
7598.15	0.00146	7598.15	-0.00255	7598.15	0.00040969	7598.15	0.1632	7598.15	0.000473484	7598.15	-0.000412752	7598.15	-0.00140278	7598.15	0.0623484	6937.07	0.175688	7598.15	0.2411	7598.15	0.0075	7598.15	0	7598.15	0.02411
7588.81	0.000623329	7588.81	-0.00111	7588.81	0.000346119	7588.81	0.1624	7588.81	7.34839e-05	7588.81	-0.0001935	7588.81	-0.00116059	7588.81	0.0606218	6929.38	0.17058	7588.81	0.2578	7588.81	0.0073	7588.81	0.000166942	7588.81	0.02179
7579.55	-1.18466e-05	7579.55	-0.00207	7579.55	0.000582324	7579.55	0.1638	7579.55	-0.000126516	7579.55	-0.000876996	7579.55	-0.000919631	7579.55	0.0581886	6921.71	0.165658	7579.55	0.2751	7579.55	0.0068	7579.55	0.00113347	7579.55	0.02188
7570.31	0.000553307	7570.31	-0.000927838	7570.31	0.000418528	7570.31	0.1674	7570.31	0.000173484	7570.31	0.000138737	7570.31	-0.00127901	7570.31	0.0559451	6914.05	0.160904	7570.31	0.2911	7570.31	0.0073	7570.31	0.0018	7570.31	0.02016
7561.04	0.000517955	7561.04	-0.00109	7561.04	5.49574e-05	7561.04	0.1706	7561.04	-0.000226516	7561.04	-0.000544345	7561.04	-0.000837869	7561.04	0.0526497	6906.41	0.15632	7561.04	0.3107	7561.04	0.008	7561.04	0.00186694	7561.04	0.01984
7551.84	-0.000116233	7551.84	-0.00205	7551.84	9.11619e-05	7551.84	0.1715	7551.84	-0.000126516	7551.84	-0.000430151	7551.84	-0.000597937	7551.84	0.0534008	6898.79	0.151912	7551.84	0.3299	7551.84	0.0091	7551.84	0.00283347	7551.84	0.01972
7542.62	0.00125	7542.62	-0.00141	7542.62	0.000527591	7542.62	0.1718	7542.62	0.000773484	7542.62	-0.000114776	7542.62	-0.00025748	7542.62	0.0513078	6891.18	0.147677	7542.62	0.3518	7542.62	0.008	7542.62	0.00420041	7542.62	0.0188
7533.47	-0.000984462	7533.47	-0.00187	7533.47	-0.000336204	7533.47	0.1705	7533.47	-0.000226516	7533.47	-0.00060211	7533.47	-0.000218229	7533.47	0.0512321	6883.59	0.143619	7533.47	0.3734	7533.47	0.0087	7533.47	0.00346694	7533.47	0.01789
7524.34	-1.76744e-05	7524.34	-0.00142	7524.34	0	7524.34	0.1715	7524.34	-0.000426516	7524.34	-0.00119	7524.34	-0.000779316	7524.34	0.0501427	6876.02	0.139747	7524.34	0.392	7524.34	0.0088	7524.34	0.00303347	7524.34	0.01527
7515.18	0.000848611	7515.18	-0.00148	7515.18	-0.000769	7515.18	0.173	7515.18	7.34839e-05	7515.18	-0.000977119	7515.18	-0.000639879	7515.18	0.048096	6868.46	0.13606	7515.18	0.4114	7515.18	0.0106	7515.18	0.00320041	7515.18	0.01455
7506.1	0.00172	7506.1	5.77212e-05	7506.1	-0.000437573	7506.1	0.1719	7506.1	0.000373484	7506.1	-0.00127	7506.1	-0.00120164	7506.1	0.0468299	6860.92	0.132554	7506.1	0.4314	7506.1	0.0111	7506.1	0.00186694	7506.1	0.01383
7497.04	0.00128	7497.04	0	7497.04	-0.00150615	7497.04	0.1724	7497.04	-0.000326516	7497.04	-0.00146	7497.04	-0.000163732	7497.04	0.0433828	6853.4	0.129227	7497.04	0.4523	7497.04	0.0133	7497.04	0.000333471	7497.04	0.01401
7488	-0.00084813	7488	-0.0012	7488	-0.00107472	7488	0.1727	7488	0.000473484	7488	-0.00155	7488	-0.000226158	7488	0.0406714	6845.89	0.126079	7488	0.4768	7488	0.0138	7488	0	7488	0.01369
7478.93	0.000819443	7478.93	-0.000499863	7478.93	-0.000643721	7478.93	0.1744	7478.93	-0.000726516	7478.93	-0.00114	7478.93	0.000311936	7478.93	0.0378587	6838.4	0.123122	7478.93	0.4989	7478.93	0.016	7478.93	0.000132047	7478.93	0.01287
7469.93	-0.000611848	7469.93	0.000301753	7469.93	-0.00111229	7469.93	0.175	7469.93	-2.65161e-05	7469.93	-0.00123	7469.93	0.000548846	7469.93	0.0372799	6830.93	0.120384	7469.93	0.5226	7469.93	0.0178	7469.93	-0.000334252	7469.93	0.01055
7460.96	0.000257175	7460.96	0.0023	7460.96	-0.000880868	7460.96	0.176	7460.96	-0.000426516	7460.96	-0.00122	7460.96	0.000585428	7460.96	0.035735	6823.47	0.11789	7460.96	0.5472	7460.96	0.0182	7460.96	-0.000700551	7460.96	0.01143
7452.01	0.000526513	7452.01	0.0033	7452.01	-0.00124944	7452.01	0.1769	7452.01	-2.65161e-05	7452.01	-0.00102	7452.01	0.000221682	7452.01	0.0330863	6816.08	0.115662	7452.01	0.5725	7452.01	0.018	7452.01	-0.00056685	7452.01	0.01101
7443.02	0.0043	7443.02	0.0023	7443.02	-0.000918441	7443.02	0.1784	7443.02	0.000173484	7443.02	-0.00121	7443.02	0.000758452	7443.02	0.0309518	6808.65	0.11367	7443.02	0.5966	7443.02	0.0169	7443.02	-0.000234804	7443.02	0.00829
7434.12	0.00317	7434.12	0.00201	7434.12	-0.00108702	7434.12	0.1793	7434.12	0.000273484	7434.12	-0.000306522	7434.12	9.40521e-05	7434.12	0.0287532	6801.24	0.11191	7434.12	0.6219	7434.12	0.0157	7434.12	9.88973e-05	7434.12	0.00817
7425.23	0.00344	7425.23	0.00391	7425.23	-0.00125559	7425.23	0.182	7425.23	0.000773484	7425.23	-0.000302782	7425.23	0.000429328	7425.23	0.0259705	6793.85	0.110321	7425.23	0.6445	7425.23	0.0138	7425.23	0.000832598	7425.23	0.00585
7416.36	0.00161	7416.36	0.00381	7416.36	-0.00132416	7416.36	0.1808	7416.36	0.000931744	7416.36	-0.000499767	7416.36	0.00066428	7416.36	0.0241848	6786.47	0.108801	7416.36	0.6711	7416.36	0.0136	7416.36	0.000866299	7416.36	0.00773
7407.52	0.000177078	7407.52	0.00321	7407.52	-0.000792736	7407.52	0.1803	7407.52	0.00126243	7407.52	-0.000297475	7407.52	-0.000301089	7407.52	0.0230545	6779.16	0.107273	7407.52	0.7009	7407.52	0.0116	7407.52	0	7407.52	0.00811
7398.69	0.00034828	7398.69	0.00381	7398.69	-0.00126131	7398.69	0.1826	7398.69	0.000993992	7398.69	-0.000402602	7398.69	0.000333221	7398.69	0.0200436	6771.81	0.105693	7398.69	0.7185	7398.69	0.0114	7398.69	-0.0002	7398.69	0.00769
7389.89	0.000619788	7389.89	0.00201	7389.89	-0.000129884	7389.89	0.1826	7389.89	0.000926433	7389.89	-0.000730685	7389.89	6.72116e-05	7389.89	0.0199108	6764.48	0.104093	7389.89	0.7413	7389.89	0.0093	7389.89	0.0001	7389.89	0.00737
7381.11	0.000291602	7381.11	0.00101	7381.11	-0.000798457	7381.11	0.1832	7381.11	0.000159747	7381.11	-0.000659177	7381.11	0.000100884	7381.11	0.017915	6757.21	0.10251	7381.11	0.7558	7381.11	0.0111	7381.11	0.0002	7381.11	0.00855
7372.35	-0.000836279	7372.35	0.00152	7372.35	-6.70312e-05	7372.35	0.1827	7372.35	0.00119393	7372.35	-0.000188076	7372.35	0.000234238	7372.35	0.0152003	6749.92	0.100933	7372.35	0.7654	7372.35	0.0104	7372.35	-0.0003	7372.35	0.00742
7363.61	-0.000163858	7363.61	0.00122	7363.61	6.43951e-05	7363.61	0.1832	7363.61	0.000828983	7363.61	-0.000817381	7363.61	-0.000832723	7363.61	0.0129282	6742.63	0.0993706	7363.61	0.7708	7363.61	0.0102	7363.61	-0.0002	7363.61	0.0063
7354.89	8.86581e-06	7354.89	0.00232	7354.89	0.000895821	7354.89	0.182	7354.89	0.000964899	7354.89	-0.00084709	7354.89	0	7354.89	0.0104858	6735.41	0.0978286	7354.89	0.7738	7354.89	0.0104	7354.89	0.0001	7354.89	0.00538
7346.19	0.00158	7346.19	0.00102	7346.19	0.00132725	7346.19	0.1834	7346.19	0.00110168	7346.19	-0.00158	7346.19	-0.00133685	7346.19	0.00829554	6728.16	0.0962661	7346.19	0.7755	7346.19	0.0099	7346.19	0	7346.19	0.00656
7337.51	0.000655215	7337.51	0.00202	7337.51	0.00105867	7337.51	0.1854	7337.51	0.00183931	7337.51	-0.00131	7337.51	-0.00177362	7337.51	0.005129	6720.93	0.0946868	7337.51	0.7703	7337.51	0.0111	7337.51	-0.00139106	7337.51	0.00624
7328.85	2.88389e-05	7328.85	0.000524519	7328.85	0.0014901	7328.85	0.1873	7328.85	0.0020778	7328.85	-0.00234	7328.85	-0.0025103	7328.85	0.00351364	6713.75	0.0931178	7328.85	0.7642	7328.85	0.0122	7328.85	-0.00228213	7328.85	0.00621
7320.22	0.00080276	7320.22	0.000226135	7320.22	0.00142153	7320.22	0.1903	7320.22	0.00251715	7320.22	-0.00167	7320.22	-0.00294689	7320.22	0.003482	6706.55	0.0915605	7320.22	0.7605	7320.22	0.0118	7320.22	-0.00257319	7320.22	0.00549
7311.6	0.00198	7311.6	-0.000172248	7311.6	0.00215295	7311.6	0.19	7311.6	0.00215734	7311.6	-0.0018	7311.6	-0.0027834	7311.6	0.00122748	6699.4	0.0900199	7311.6	0.7551	7311.6	0.0112	7311.6	-0.00316426	7311.6	0.00497
7303	-0.00125	7303	-0.000670632	7303	0.00138438	7303	0.1884	7303	0.00199838	7303	-0.000633753	7303	-0.00311982	7303	1.39058e-05	6692.23	0.0884465	7303	0.7493	7303	0.0109	7303	-0.00355532	7303	0.00474
7294.42	-0.00147	7294.42	-0.00277	7294.42	0.00231581	7294.42	0.1883	7294.42	0.00154026	7294.42	-0.000366252	7294.42	-0.00335616	7294.42	-0.00044597	6685.12	0.0868469	7294.42	0.7393	7294.42	0.0097	7294.42	-0.00444639	7294.42	0.00402
7285.87	-0.000598595	7285.87	-0.00227	7285.87	0.00214723	7285.87	0.1871	7285.87	0.00148298	7285.87	-0.000699144	7285.87	-0.00269241	7285.87	-5.69241e-05	6677.97	0.0852187	7285.87	0.7305	7285.87	0.0086	7285.87	-0.00623745	7285.87	0.0052
7277.33	-0.00132	7277.33	-0.00137	7277.33	0.00167866	7277.33	0.1863	7277.33	0.00102654	7277.33	-3.24273e-05	7277.33	-0.00312857	7277.33	-4.52975e-05	6670.89	0.0836149	7277.33	0.7233	7277.33	0.0077	7277.33	-0.00583121	7277.33	0.00587
7268.82	-0.000647513	7268.82	-0.00136	7268.82	0.00211008	7268.82	0.189	7268.82	7.09303e-05	7268.82	-6.6101e-05	7268.82	-0.00186465	7268.82	0.000785359	6663.78	0.0820508	7268.82	0.7112	7268.82	0.0061	7268.82	-0.00462497	7268.82	0.00751
7260.37	0.000635968	7260.37	-0.000559455	7260.37	0.00264194	7260.37	0.1882	7260.37	-0.000381644	7260.37	-0.000201193	7260.37	-0.00240043	7260.37	0.000821156	6656.73	0.0805657	7260.37	0.6999	7260.37	0.005	7260.37	-0.00332809	7260.37	0.00744
7251.89	0.00109	7251.89	-0.00166	7251.89	0.00237336	7251.89	0.189	7251.89	-0.0012356	7251.89	0.000664359	7251.89	-0.00183634	7251.89	0.00133575	6649.64	0.07912	7251.89	0.6876	7251.89	0.0039	7251.89	-0.00272185	7251.89	0.00676
7243.44	0.00114	7243.44	0.000743778	7243.44	0.00230479	7243.44	0.1874	7243.44	-0.00158872	7243.44	0.000529526	7243.44	-0.00167217	7243.44	0.00115678	6642.62	0.0776846	7243.44	0.673	7243.44	0.0051	7243.44	-0.00261561	7243.44	0.00939
7235	-0.00161	7235	0.00135	7235	0.00143622	7235	0.1871	7235	-0.00184103	7235	-5.69295e-06	7235	-0.00150791	7235	0.00183468	6635.61	0.0762046	7235	0.6507	7235	0.0039	7235	-0.00310937	7235	0.00932
7226.58	0.000736335	7226.58	0.000447011	7226.58	0.00266764	7226.58	0.1863	7226.58	-0.00369251	7226.58	-0.000141295	7226.58	-0.000343575	7226.58	0.00194135	6628.57	0.0746347	7226.58	0.6373	7226.58	0.0035	7226.58	-0.00370313	7226.58	0.01255
7218.24	-0.00171	7218.24	-0.000648278	7218.24	0.00129949	7218.24	0.1844	7218.24	-0.002941	7218.24	-0.000878297	7218.24	-7.89343e-05	7218.24	0.00263518	6621.6	0.0729528	7218.24	0.6205	7218.24	0.0052	7218.24	-0.00200624	7218.24	0.01457
7209.86	-0.00266	7209.86	0.000853339	7209.86	0.00233092	7209.86	0.1839	7209.86	-0.000190863	7209.86	0.000385341	7209.86	-0.000214432	7209.86	0.00284685	6614.63	0.0711274	7209.86	0.6089	7209.86	0.004	7209.86	0	7209.86	0.0153
7201.5	-0.00411	7201.5	0.000554955	7201.5	0.00136235	7201.5	0.1833	7201.5	-0.00203991	7201.5	-0.000551401	7201.5	-0.000349847	7201.5	-9.68677e-05	6607.64	0.0691435	7201.5	0.5974	7201.5	0.0065	7201.5	-0.000266805	7201.5	0.01543
7193.21	-0.00316	7193.21	0.000459667	7193.21	0.0023942	7193.21	0.1845	7193.21	-0.000385988	7193.21	-0.000889532	7193.21	-0.00138496	7193.21	-0.0013975	6600.7	0.0670394	7193.21	0.5939	7193.21	0.0044	7193.21	0.000366805	7193.21	0.01825
7184.89	-0.00291	7184.89	0.00156	7184.89	0.00112562	7184.89	0.1868	7184.89	-0.000833426	7184.89	0.00177	7184.89	-0.000820213	7184.89	-0.00114762	6593.78	0.0648102	7184.89	0.5867	7184.89	0.0052	7184.89	0.0012	7184.89	0.02068
7176.59	-0.00326	7176.59	-3.71004e-05	7176.59	0.00125705	7176.59	0.1845	7176.59	-0.000980062	7176.59	-0.000664896	7176.59	-0.000655383	7176.59	0.000713549	6586.83	0.0624571	7176.59	0.5835	7176.59	0.0037	7176.59	0.0012332	7176.59	0.02051
7168.36	-0.000507677	7168.36	0.00147	7168.36	0.0018889	7168.36	0.1867	7168.36	-0.000923751	7168.36	0.000295856	7168.36	-0.000190255	7168.36	-0.00046906	6579.94	0.0600483	7168.36	0.5796	7168.36	0.0043	7168.36	0.000366805	7168.36	0.02434
7160.09	-0.00266	7160.09	0.000269228	7160.09	-0.000479671	7160.09	0.1843	7160.09	0.000131206	7160.09	-4.27591e-05	7160.09	0.000474737	7160.09	0.00072075	6573.07	0.0576085	7160.09	0.5809	7160.09	0.0044	7160.09	0	7160.09	0.02716
7151.85	-0.00231	7151.85	-0.00143	7151.85	-0.00114824	7151.85	0.1844	7151.85	-0.000413042	7151.85	-0.000281746	7151.85	-0.000360192	7151.85	-0.000129941	6566.2	0.05515	7151.85	0.5751	7151.85	0.0052	7151.85	0.000492461	7151.85	0.03139
7143.67	-0.00365	7143.67	-0.00272	7143.67	-0.000816392	7143.67	0.1839	7143.67	0.00234563	7143.67	7.79006e-05	7143.67	-0.000994823	7143.67	0.00152611	6559.36	0.0526662	7143.67	0.5724	7143.67	0.0052	7143.67	-0.00012	7143.67	0.03672
7135.47	-0.0037	7135.47	-0.00101	7135.47	-0.00148497	7135.47	0.1848	7135.47	0.00170296	7135.47	0.000638177	7135.47	-2.95916e-05	7135.47	-0.000131977	6552.48	0.0501305	7135.47	0.5708	7135.47	0.005	7135.47	0.000172461	7135.47	0.04124
7127.33	-0.00365	7127.33	-0.000795165	7127.33	-0.00125311	7127.33	0.1846	7127.33	0.0042632	7127.33	0.0012	7127.33	-0.000564065	7127.33	-0.000642519	6545.66	0.0475842	7127.33	0.5691	7127.33	0.0045	7127.33	0.00026	7127.33	0.04657
7119.16	-0.0045	7119.16	-0.00128	7119.16	-0.00162169	7119.16	0.1859	7119.16	0.00612209	7119.16	0.000856637	7119.16	-0.000198674	7119.16	0.000166289	6538.85	0.04506	7119.16	0.5613	7119.16	0.0041	7119.16	-0.000547539	7119.16	0.04829
7111.06	-0.00465	7111.06	-0.000663171	7111.06	-0.00238984	7111.06	0.1849	7111.06	0.00868388	7111.06	0.000614828	7111.06	-0.00063299	7111.06	0.00101959	6532.06	0.0426342	7111.06	0.5527	7111.06	0.004	7111.06	-0.00086	7111.06	0.05122
7102.93	-0.00369	7102.93	0.000552876	7102.93	-0.00155841	7102.93	0.1848	7102.93	0.0142443	7102.93	0.000973645	7102.93	0.000632558	7102.93	0.000440239	6525.29	0.0403924	7102.93	0.5437	7102.93	0.0052	7102.93	0.000532461	7102.93	0.05275
7094.87	-0.00244	7094.87	-3.11767e-05	7094.87	-0.00182656	7094.87	0.186	7094.87	0.0182076	7094.87	0.000631116	7094.87	0.000298398	7094.87	0.000604458	6518.52	0.0383889	7094.87	0.5372	7094.87	0.0049	7094.87	0.00112	7094.87	0.05347
7086.77	0.000110299	7086.77	8.48703e-05	7086.77	-0.000495131	7086.77	0.1877	7086.77	0.0235696	7086.77	0.000489211	7086.77	-0.000435897	7086.77	0.00224798	6511.77	0.0366125	7086.77	0.5274	7086.77	0.0058	7086.77	0.00101246	7086.77	0.0521
7078.74	0.000262877	7078.74	-0.000599182	7078.74	-0.000763278	7078.74	0.1868	7078.74	0.0284345	7078.74	0.000245967	7078.74	-0.000169902	7078.74	0.000995256	6505.04	0.0350168	7078.74	0.5159	7078.74	0.0059	7078.74	0	7078.74	0.04953
7070.69	-0.00118	7070.69	-0.00278	7070.69	-0.000931852	7070.69	0.1873	7070.69	0.032698	7070.69	0.000403345	7070.69	-0.000404041	7070.69	-0.000203717	6498.32	0.0335524	7070.69	0.5061	7070.69	0.0076	7070.69	0.000122371	7070.69	0.04905
7062.7	0.00177	7062.7	-0.00147	7062.7	0	7062.7	0.1872	7062.7	0.0357644	7062.7	0.00065939	7062.7	-0.000637892	7062.7	-0.00158543	6491.61	0.0321686	7062.7	0.4954	7062.7	0.007	7062.7	-0.000366578	7062.7	0.04318
7054.72	0.00172	7054.72	-5.12406e-05	7054.72	-0.000398974	7054.72	0.1882	7054.72	0.0380315	7054.72	0.000415083	7054.72	-0.000371666	7054.72	-0.00160676	6484.92	0.0308252	7054.72	0.4878	7054.72	0.0071	7054.72	-0.000855526	7054.72	0.0412
7046.72	0.000873672	7046.72	0.00186	7046.72	-0.000697316	7046.72	0.1882	7046.72	0.0382973	7046.72	0.000871395	7046.72	-0.000605574	7046.72	-0.0021282	6478.24	0.0295064	7046.72	0.4801	7046.72	0.007	7046.72	-0.000733155	7046.72	0.03683
7038.78	0.00113	7038.78	0.00298	7038.78	-0.00149629	7038.78	0.1878	7038.78	0.039166	7038.78	0.000726385	7038.78	6.08042e-05	7038.78	-0.00219654	6471.57	0.0282247	7038.78	0.4696	7038.78	0.0069	7038.78	-0.0010221	7038.78	0.03156
7030.87	0.000480002	7030.87	0.0041	7030.87	-0.00209526	7030.87	0.1877	7030.87	0.0393353	7030.87	0.00138	7030.87	0.000227258	7030.87	-0.000558071	6464.92	0.0270062	7030.87	0.4579	7030.87	0.0062	7030.87	-0.00211105	7030.87	0.02758
7022.92	0.000233034	7022.92	0.00231	7022.92	-0.00199361	7022.92	0.1878	7022.92	0.0373034	7022.92	0.00184	7022.92	-6.42122e-06	7022.92	-0.000628607	6458.28	0.0258702	7022.92	0.4471	7022.92	0.0067	7022.92	-0.00288868	7022.92	0.02531
7015.03	-0.00311	7015.03	0.00103	7015.03	-0.00239258	7015.03	0.1851	7015.03	0.0348743	7015.03	0.00179	7015.03	-0.000339816	7015.03	-0.000946265	6451.65	0.0248154	7015.03	0.4388	7015.03	0.0081	7015.03	-0.00317763	7015.03	0.02243
7007.17	-0.00146	7007.17	0.00344	7007.17	-0.00209155	7007.17	0.188	7007.17	0.0345459	7007.17	0.00194	7007.17	-0.000273136	7007.17	-0.00111894	6445.04	0.0238189	7007.17	0.4301	7007.17	0.0084	7007.17	-0.00276658	7007.17	0.02046
6999.27	-0.00221	6999.27	0.00426	6999.27	-0.0027899	6999.27	0.1865	6999.27	0.0327161	6999.27	0.0018	6999.27	-0.000406589	6999.27	-0.00207825	6438.49	0.022845	6999.27	0.4174	6999.27	0.0074	6999.27	-0.00234421	6999.27	0.01728
6991.44	0.000147083	6991.44	0.00398	6991.44	-0.00238887	6991.44	0.1859	6991.44	0.0328892	6991.44	0.00185	6991.44	-0.00083976	6991.44	-0.00122706	6431.9	0.0218334	6991.44	0.4035	6991.44	0.0068	6991.44	-0.00183316	6991.44	0.01581
6983.63	-0.0015	6983.63	0.00229	6983.63	-0.00288784	6983.63	0.1845	6983.63	0.032363	6983.63	0.00155	6983.63	0.000127144	6983.63	-0.000259134	6425.33	0.0207622	6983.63	0.3863	6983.63	0.0065	6983.63	-0.0013221	6983.63	0.01524
6975.84	0.000254875	6975.84	0.00281	6975.84	-0.00178682	6975.84	0.1862	6975.84	0.0323376	6975.84	0.00213	6975.84	-5.87886e-06	6975.84	0.000380182	6418.77	0.0196314	6975.84	0.3712	6975.84	0.0061	6975.84	-0.000911052	6975.84	0.01446
6968.06	-0.00219	6968.06	0.00132	6968.06	-0.00238579	6968.06	0.1865	6968.06	0.0314128	6968.06	0.0013	6968.06	0.000361172	6968.06	-0.000684831	6412.23	0.0184629	6968.06	0.3577	6968.06	0.008	6968.06	0	6968.06	0.01429
6960.25	-0.000837208	6960.25	0.000340526	6960.25	-0.00168413	6960.25	0.1838	6960.25	0.0307868	6960.25	0.00168	6960.25	0.000528091	6960.25	-0.0014408	6405.74	0.0172986	6960.25	0.3432	6960.25	0.0067	6960.25	-0.000374883	6960.25	0.01661
6952.51	-0.00178	6952.51	0.000656474	6952.51	-0.000783106	6952.51	0.1852	6952.51	0.0309635	6952.51	0.00185	6952.51	0.000895289	6952.51	-0.00165213	6399.22	0.0161563	6952.51	0.3297	6952.51	0.0071	6952.51	-0.000149922	6952.51	0.01534
6944.78	-0.00303	6944.78	-0.000227579	6944.78	-0.00038208	6944.78	0.1848	6944.78	0.0296409	6944.78	0.00123	6944.78	0.00016256	6944.78	-0.00202955	6392.72	0.0150629	6944.78	0.3181	6944.78	0.0083	6944.78	0.000375039	6944.78	0.01676
6937.07	-0.002	6937.07	-0.000111632	6937.07	0.000918946	6937.07	0.1852	6937.07	0.0286191	6937.07	0.00151	6937.07	0.000329904	6937.07	-0.00387618	6386.27	0.0140166	6937.07	0.3049	6937.07	0.0068	6937.07	0	6937.07	0.02009
6929.38	-0.00185	6929.38	-0.000195684	6929.38	0.00101997	6929.38	0.1846	6929.38	0.0250979	6929.38	0.00118	6929.38	0.00079732	6929.38	-0.0032572	6379.79	0.0129938	6929.38	0.2935	6929.38	0.0068	6929.38	0.000333333	6929.38	0.01891
6921.71	0.000398655	6921.71	0.000820263	6921.71	0.001121	6921.71	0.1871	6921.71	0.0228775	6921.71	0.000860541	6921.71	0.000864808	6921.71	-0.0018609	6373.32	0.0120012	6921.71	0.2826	6921.71	0.0057	6921.71	0.000866667	6921.71	0.01854
6914.05	-0.00095504	6914.05	-0.00106	6914.05	0.00122203	6914.05	0.1848	6914.05	0.0196578	6914.05	0.00104	6914.05	0.000632368	6914.05	-0.00217799	6366.91	0.0110489	6914.05	0.2722	6914.05	0.0053	6914.05	0.0019	6914.05	0.02356
6906.41	9.07214e-05	6906.41	-0.00195	6906.41	0.00152305	6906.41	0.1855	6906.41	0.0161387	6906.41	0.000916105	6906.41	0	6906.41	-0.00491302	6360.47	0.0101395	6906.41	0.2624	6906.41	0.0052	6906.41	0.00213333	6906.41	0.02659
6898.79	0.00063594	6898.79	-0.000931895	6898.79	0.00232408	6898.79	0.1854	6898.79	0.0137204	6898.79	0.00109	6898.79	0.000849704	6898.79	-0.00500684	6354.05	0.00930732	6898.79	0.2539	6898.79	0.0053	6898.79	0.00136667	6898.79	0.02991
6891.18	0.000780618	6891.18	-0.000615947	6891.18	0.0019251	6891.18	0.1853	6891.18	0.00950281	6891.18	0.000972747	6891.18	0.0010993	6891.18	-0.00466177	6347.67	0.00859014	6891.18	0.2457	6891.18	0.0055	6891.18	0	6891.18	0.03444
6883.59	0.00122	6883.59	0	6883.59	0.00282613	6883.59	0.1847	6883.59	0.0074859	6883.59	0.00135	6883.59	-5.12177e-05	6883.59	-0.00422904	6341.27	0.00800647	6883.59	0.2375	6883.59	0.0045	6883.59	-0.001	6883.59	0.03646
6876.02	0.000468359	6876.02	-0.00195	6876.02	0.00282716	6876.02	0.1848	6876.02	0.00486969	6876.02	0.00113	6876.02	0.000298158	6876.02	-0.00292266	6334.93	0.00755441	6876.02	0.229	6876.02	0.005	6876.02	-0.0022	6876.02	0.03919
6868.46	0.000111425	6868.46	-0.0019	6868.46	0.00342818	6868.46	0.1839	6868.46	0.00355417	6868.46	0.000809716	6868.46	0.00114743	6868.46	-0.00445161	6328.55	0.00719714	6868.46	0.2221	6868.46	0.0053	6868.46	-0.0026	6868.46	0.04211
6860.92	0.00175	6860.92	-0.00264	6860.92	0.00432921	6860.92	0.1836	6860.92	0.00313934	6860.92	0.000589237	6860.92	0.00119658	6860.92	-0.00307746	6322.23	0.00691155	6860.92	0.2139	6860.92	0.0041	6860.92	-0.0029	6860.92	0.04483
6853.4	0.0021	6853.4	-0.00289	6853.4	0.00434686	6853.4	0.1834	6853.4	0.00182521	6853.4	0.00157	6853.4	0.00154564	6853.4	-0.00254941	6315.88	0.00667387	6853.4	0.2063	6853.4	0.0044	6853.4	-0.003	6853.4	0.04776
6845.89	0.000837429	6845.89	-0.00264	6845.89	0.00548742	6845.89	0.1836	6845.89	0.00111176	6845.89	0.000549071	6845.89	0.00189458	6845.89	-0.00190734	6309.59	0.0064665	6845.89	0.1977	6845.89	0.0047	6845.89	-0.0033	6845.89	0.04748
6838.4	7.83715e-05	6838.4	-0.000285014	6838.4	0.00502798	6838.4	0.185	6838.4	0.000498999	6838.4	0.00103	6838.4	0.00154342	6838.4	-4.36533e-05	6303.26	0.0062636	6838.4	0.1908	6838.4	0.005	6838.4	-0.0024	6838.4	0.04891
6830.93	-0.000281213	6830.93	-0.000532516	6830.93	0.00466854	6830.93	0.1853	6830.93	0.000986922	6830.93	0.000709955	6830.93	0.000792147	6830.93	-0.0004257	6296.99	0.00604251	6830.93	0.1851	6830.93	0.0053	6830.93	-0.0012	6830.93	0.05063
6823.47	0.000358678	6823.47	0.000619982	6823.47	0.0061091	6823.47	0.1856	6823.47	0.00225522	6823.47	0.00119	6823.47	0.00074077	6823.47	0.000480624	6290.69	0.00578185	6823.47	0.1783	6823.47	0.006	6823.47	0	6823.47	0.05156
6816.08	-0.000203449	6816.08	0.000368402	6816.08	0.00754879	6816.08	0.1852	6816.08	0.00392001	6816.08	0.000772625	6816.08	0.00118899	6816.08	-0.00177135	6284.45	0.00547664	6816.08	0.171	6816.08	0.0077	6816.08	-0.000451044	6816.08	0.05358
6808.65	-0.0002646	6808.65	0.000220899	6808.65	0.00918935	6808.65	0.188	6808.65	0.0058826	6808.65	0.000553976	6808.65	0.0010374	6808.65	-0.00139704	6278.21	0.00511975	6808.65	0.1632	6808.65	0.0112	6808.65	-0.00110052	6808.65	0.0534
6801.24	0.000873729	6801.24	-0.000426603	6801.24	0.0103299	6801.24	0.189	6801.24	0.00834636	6801.24	3.55848e-05	6801.24	0.000985705	6801.24	-0.00182616	6271.95	0.00469518	6801.24	0.1585	6801.24	0.0132	6801.24	-0.00045	6801.24	0.05483
6793.85	0.00021154	6793.85	-0.00217	6793.85	0.0119705	6793.85	0.1897	6793.85	0.00831128	6793.85	-0.000182549	6793.85	0.000433907	6793.85	-0.00182723	6265.74	0.00420223	6793.85	0.1531	6793.85	0.0151	6793.85	5.21921e-07	6793.85	0.05365
6786.47	-0.00225	6786.47	-0.00132	6786.47	0.012611	6786.47	0.1897	6786.47	0.00727737	6786.47	-0.000300426	6786.47	-0.000117996	6786.47	-0.00156333	6259.55	0.00364308	6786.47	0.1473	6786.47	0.0159	6786.47	-4.89562e-05	6786.47	0.05458
6779.16	-0.00102	6779.16	-0.00167	6779.16	0.0134507	6779.16	0.1902	6779.16	0.00834794	6779.16	-0.000317312	6779.16	-0.000770302	6779.16	-0.000180817	6253.32	0.00303317	6779.16	0.1452	6779.16	0.0156	6779.16	0	6779.16	0.0549
6771.81	0.000320407	6771.81	-0.00222	6771.81	0.0139913	6771.81	0.1918	6771.81	0.00841633	6771.81	-0.00023468	6771.81	-0.000322412	6771.81	-2.00466e-05	6247.15	0.00240771	6771.81	0.1437	6771.81	0.0154	6771.81	9.11162e-05	6771.81	0.05372
6764.48	0.000256165	6764.48	-0.00347	6764.48	0.0148318	6764.48	0.1925	6764.48	0.00808588	6764.48	-5.17942e-05	6764.48	-0.000574626	6764.48	-0.00040349	6240.99	0.00178556	6764.48	0.1412	6764.48	0.0154	6764.48	8.22323e-05	6764.48	0.05245
6757.21	-0.00111	6757.21	-0.00262	6757.21	0.0151715	6757.21	0.1931	6757.21	0.00725987	6757.21	3.20747e-05	6757.21	-0.000427241	6757.21	-0.00129387	6234.84	0.00119024	6757.21	0.138	6757.21	0.014	6757.21	0.000572779	6757.21	0.05247
6749.92	-0.000475311	6749.92	-0.00147	6749.92	0.0155121	6749.92	0.1934	6749.92	0.0069317	6749.92	0.000515465	6749.92	-0.000379661	6749.92	-0.00198709	6228.67	0.000642811	6749.92	0.135	6749.92	0.0122	6749.92	0.0011639	6749.92	0.0513
6742.63	-0.000841073	6742.63	-0.00141	6742.63	0.0152526	6742.63	0.1919	6742.63	0.00660466	6742.63	0.000399107	6742.63	6.7817e-05	6742.63	-0.00174803	6222.54	0.000167382	6742.63	0.1308	6742.63	0.0104	6742.63	0.00175501	6742.63	0.05082
6735.41	0.0001912	6735.41	-0.00137	6735.41	0.0155923	6735.41	0.1915	6735.41	0.00538205	6735.41	0.000483724	6735.41	-0.000485103	6735.41	-0.00249862	6216.43	-0.000223531	6735.41	0.1274	6735.41	0.0083	6735.41	0.00154556	6735.41	0.05024
6728.16	0.00192	6728.16	-0.00021386	6728.16	0.0162329	6728.16	0.1905	6728.16	0.00515727	6728.16	0.000161998	6728.16	6.21708e-05	6728.16	-0.000975022	6210.33	-0.000509411	6728.16	0.1245	6728.16	0.0071	6728.16	0.00113667	6728.16	0.04777
6720.93	0.00266	6720.93	-0.000561362	6720.93	0.0163734	6720.93	0.19	6720.93	0.00483363	6720.93	0.000418021	6720.93	-0.000290657	6720.93	-0.000963409	6204.24	-0.000654278	6720.93	0.1207	6720.93	0.0057	6720.93	0.00072779	6720.93	0.04679
6713.75	0.00209	6713.75	0.000687058	6713.75	0.0166131	6713.75	0.1897	6713.75	0.00491437	6713.75	0.000373575	6713.75	-4.38796e-05	6713.75	0.00101172	6198.17	-0.000642205	6713.75	0.1173	6713.75	0.0049	6713.75	0.000318337	6713.75	0.04591
6706.55	0.00392	6706.55	0.00284	6706.55	0.0178537	6706.55	0.1888	6706.55	0.00569297	6706.55	0.000429358	6706.55	-0.000996909	6706.55	0.000739709	6192.1	-0.000486139	6706.55	0.1139	6706.55	0.0042	6706.55	0.000209453	6706.55	0.04284
6699.4	0.00285	6699.4	0.00259	6699.4	0.0173934	6699.4	0.1879	6699.4	0.00627593	6699.4	0.000184675	6699.4	-0.00125033	6699.4	-0.0026345	6186.01	-0.000226257	6699.4	0.111	6699.4	0.0044	6699.4	0	6699.4	0.04186
6692.23	0.00308	6692.23	0.00174	6692.23	0.0164339	6692.23	0.188	6692.23	0.00585675	6692.23	0.00024022	6692.23	-0.00130356	6692.23	-0.0041894	6179.97	6.86076e-05	6692.23	0.1081	6692.23	0.005	6692.23	0.000222306	6692.23	0.04318
6685.12	0.00101	6685.12	0.00129	6685.12	0.0150736	6685.12	0.1869	6685.12	0.00524191	6685.12	-0.0002047	6685.12	-0.000857183	6685.12	-0.0018846	6173.94	0.000302067	6685.12	0.1056	6685.12	0.0063	6685.12	-0.000161153	6685.12	0.04501
6677.97	0.00154	6677.97	0.00194	6677.97	0.0133142	6677.97	0.1855	6677.97	0.00662494	6677.97	-0.000249391	6677.97	-0.00171061	6677.97	-0.00103662	6167.93	0.000367349	6677.97	0.104	6677.97	0.0066	6677.97	-0.000238847	6677.97	0.04633
6670.89	0.00157	6670.89	0.00249	6670.89	0.0124539	6670.89	0.1842	6670.89	0.0068123	6670.89	-0.000594545	6670.89	-0.00126443	6670.89	-0.00123427	6161.92	0.000218675	6670.89	0.1013	6670.89	0.0062	6670.89	-0.000322306	6670.89	0.04795
6663.78	0.000495431	6663.78	0.00214	6663.78	0.00859442	6663.78	0.1851	6663.78	0.00829753	6663.78	0.000260529	6663.78	-0.00191806	6663.78	-0.00129362	6155.93	-7.07646e-05	6663.78	0.0988	6663.78	0.0067	6663.78	0	6663.78	0.05028
6656.73	0.00112	6656.73	0.00169	6656.73	0.0072341	6656.73	0.1834	6656.73	0.00798706	6656.73	0.000115142	6656.73	-0.000872071	6656.73	-0.0014375	6149.95	-0.000278717	6656.73	0.097	6656.73	0.0067	6656.73	0.00141902	6656.73	0.0533
6649.64	0.00135	6649.64	0.00134	6649.64	0.00497466	6649.64	0.1834	6649.64	0.00837447	6649.64	-0.000130018	6649.64	-0.00112589	6649.64	3.38719e-05	6143.98	-0.00177719	6649.64	0.0947	6649.64	0.0073	6649.64	0.00204131	6649.64	0.05592
6642.62	0.00108	6642.62	0.00139	6642.62	0.00321434	6642.62	0.1823	6642.62	0.00856616	6642.62	2.43644e-05	6642.62	-0.0018801	6642.62	0.00088841	6138.02	-0.00307752	6642.62	0.0936	6642.62	0.0076	6642.62	0.00146033	6642.62	0.05854
6635.61	-0.000898525	6635.61	0.00234	6635.61	0.00145403	6635.61	0.1834	6635.61	0.00835893	6635.61	7.86317e-05	6635.61	-0.00253441	6635.61	-0.00195814	6132.11	-0.00330499	6635.61	0.0917	6635.61	0.0079	6635.61	0.00137935	6635.61	0.06097
6628.57	0.000527851	6628.57	0.00249	6628.57	0.000594586	6628.57	0.1832	6628.57	0.00944958	6628.57	0.000133125	6628.57	-0.00258853	6628.57	-0.000845125	6126.17	-0.00218242	6628.57	0.091	6628.57	0.0074	6628.57	0.00150163	6628.57	0.06439
6621.6	-0.000347664	6621.6	0.00514	6621.6	3.42686e-05	6621.6	0.1835	6621.6	0.0103445	6621.6	-0.000312837	6621.6	-0.00294302	6621.6	0.00231586	6120.25	0.000400648	6621.6	0.0907	6621.6	0.0069	6621.6	0.00242065	6621.6	0.06521
6614.63	0.000176349	6614.63	0.00579	6614.63	-0.000326049	6614.63	0.1837	6614.63	0.0120405	6614.63	0.000141087	6614.63	-0.00199762	6614.63	0.0046084	6114.34	-0.000491255	6614.63	0.09	6614.63	0.0074	6614.63	0.00293967	6614.63	0.06553
6607.64	0.000101296	6607.64	0.00514	6607.64	-0.000585488	6607.64	0.1827	6607.64	0.0123343	6607.64	-0.0013	6607.64	-0.00285202	6607.64	0.00496912	6108.44	-0.0011018	6607.64	0.0895	6607.64	0.0077	6607.64	0.00316196	6607.64	0.06686
6600.7	0.000224367	6600.7	0.00499	6600.7	-0.00124581	6600.7	0.1829	6600.7	0.0132324	6600.7	-0.000751066	6600.7	-0.00320681	6600.7	0.00105391	6102.55	-0.000825187	6600.7	0.0889	6600.7	0.0074	6600.7	0.00228098	6600.7	0.06818
6593.78	-0.000253031	6593.78	0.00464	6593.78	-0.00180612	6593.78	0.183	6593.78	0.0139316	6593.78	-0.0013	6593.78	-0.00266169	6593.78	0.00247346	6096.67	-7.23894e-05	6593.78	0.0884	6593.78	0.0087	6593.78	0	6593.78	0.0715
6586.83	0.000770501	6586.83	0.00439	6586.83	-0.000965562	6586.83	0.1839	6586.83	0.0156286	6586.83	-0.000743673	6586.83	-0.00201638	6586.83	0.00169816	6090.84	0.00068105	6586.83	0.0877	6586.83	0.0071	6586.83	-0.00115432	6586.83	0.07303
6579.94	0.00029217	6579.94	0.00254	6579.94	-0.00182588	6579.94	0.1833	6579.94	0.0180299	6579.94	-0.00109	6579.94	-0.00227145	6579.94	0.00239217	6084.98	0.00108267	6579.94	0.088	6579.94	0.0072	6579.94	-0.00171954	6579.94	0.07575
6573.07	0.000513375	6573.07	0.00249	6573.07	-0.0010862	6573.07	0.183	6573.07	0.0213322	6573.07	-0.000537064	6573.07	-0.00212662	6573.07	0.00230142	6079.14	0.0005966	6573.07	0.0876	6573.07	0.0081	6573.07	-0.00188477	6573.07	0.07787
6566.2	0.000534119	6566.2	0.00144	6566.2	-0.00104651	6566.2	0.1821	6566.2	0.0220355	6566.2	-0.000383927	6566.2	-0.00188187	6566.2	0.00120206	6073.3	-0.00121057	6566.2	0.0874	6566.2	0.0069	6566.2	-0.00245	6566.2	0.08269
6559.36	-0.00115	6559.36	-0.000915086	6559.36	-0.000772997	6559.36	0.1801	6559.36	0.0253398	6559.36	-0.0005309	6559.36	-0.00173722	6559.36	0.00218321	6067.52	0.00059835	6559.36	0.0867	6559.36	0.0082	6559.36	-0.00281523	6559.36	0.08601
6552.48	-0.00102	6552.48	0.000537412	6552.48	-0.00062741	6552.48	0.1791	6552.48	0.0276421	6552.48	-0.000177652	6552.48	-0.000492388	6552.48	0.0029381	6061.71	0.0050901	6552.48	0.0853	6552.48	0.0078	6552.48	-0.00256954	6552.48	0.08814
6545.66	-0.00060503	6545.66	0.00369	6545.66	-8.21074e-05	6545.66	0.1798	6545.66	0.0306486	6545.66	-0.000924847	6545.66	-0.00274792	6545.66	0.00158639	6055.91	0.00763816	6545.66	0.0843	6545.66	0.0076	6545.66	-0.00183477	6545.66	0.09166
6538.85	0.000313878	6538.85	0.00423	6538.85	0.0010632	6538.85	0.1767	6538.85	0.032756	6538.85	-0.000972151	6538.85	-0.00170355	6538.85	0.00125236	6050.16	0.00838852	6538.85	0.0841	6538.85	0.007	6538.85	0	6538.85	0.09438
6532.06	-0.000467669	6532.06	0.00128	6532.06	0.000108497	6532.06	0.1775	6532.06	0.0323645	6532.06	-0.00152	6532.06	-0.00285928	6532.06	-0.000730231	6044.38	0.0075769	6532.06	0.0827	6532.06	0.0082	6532.06	-0.000171429	6532.06	0.1012
6525.29	-0.00024967	6525.29	0.00123	6525.29	0.0009538	6525.29	0.1772	6525.29	0.032774	6525.29	-0.000567089	6525.29	-0.00161509	6525.29	-0.000340121	6038.65	0.0056352	6525.29	0.0812	6525.29	0.008	6525.29	0.00165714	6525.29	0.10463
6518.52	-0.00085325	6518.52	-0.00042049	6518.52	9.91023e-05	6518.52	0.1774	6518.52	0.0318845	6518.52	-0.00121	6518.52	-0.00187099	6518.52	0.000254275	6032.89	0.00293504	6518.52	0.0803	6518.52	0.0092	6518.52	0.00208571	6518.52	0.10805
6511.77	-0.000255517	6511.77	0.00135	6511.77	0.000944405	6511.77	0.178	6511.77	0.0313961	6511.77	-0.00146	6511.77	-0.00192699	6511.77	0.000101371	6027.15	0.00156794	6511.77	0.0805	6511.77	0.0096	6511.77	0.00181429	6511.77	0.11147
6505.04	-0.0009584	6505.04	0.000461616	6505.04	0.00108971	6505.04	0.1781	6505.04	0.0313086	6505.04	-0.00181	6505.04	-0.00198308	6505.04	-0.000883856	6021.45	0.00077469	6505.04	0.0806	6505.04	0.0118	6505.04	0.00214286	6505.04	0.11359
6498.32	-0.000461897	6498.32	0.000670397	6498.32	0.00203501	6498.32	0.1796	6498.32	0.0298221	6498.32	-0.00196	6498.32	-0.00173926	6498.32	0.000440999	6015.73	0.000369339	6498.32	0.0806	6498.32	0.0135	6498.32	0.00167143	6498.32	0.11941
6491.61	-0.00277	6491.61	-0.00162	6491.61	0.00188031	6491.61	0.1794	6491.61	0.0261367	6491.61	-0.00241	6491.61	-0.00159553	6491.61	0.000357691	6010.05	0.000572007	6491.61	0.0786	6491.61	0.015	6491.61	0	6491.61	0.12063
6484.92	-0.00147	6484.92	-1.20396e-05	6484.92	0.00212561	6484.92	0.1809	6484.92	0.0245523	6484.92	-0.00305	6484.92	-0.000951884	6484.92	0.0012077	6004.35	0.00144038	6484.92	0.077	6484.92	0.0158	6484.92	7.5059e-05	6484.92	0.12376
6478.24	-0.00238	6478.24	-0.0028	6478.24	0.00167092	6478.24	0.181	6478.24	0.0218688	6478.24	-0.0027	6478.24	-0.00140833	6478.24	-0.000952739	5998.69	0.000329339	6478.24	0.0755	6478.24	0.0158	6478.24	0.000350118	6478.24	0.12748
6471.57	-0.00118	6471.57	-0.00199	6471.57	0.00241622	6471.57	0.181	6471.57	0.0221864	6471.57	-0.00345	6471.57	-0.00146487	6471.57	-0.000512433	5993.01	-0.00145609	6471.57	0.0747	6471.57	0.0153	6471.57	0.000425177	6471.57	0.1294
6464.92	-0.000688524	6464.92	-0.000985695	6464.92	0.00226152	6464.92	0.1818	6464.92	0.0215049	6464.92	-0.0031	6464.92	-0.0013215	6464.92	0.000524323	5987.38	-0.0024646	6464.92	0.0749	6464.92	0.0146	6464.92	-0.000399764	6464.92	0.12772
6458.28	-0.000895665	6458.28	0.00132	6458.28	0.00230682	6458.28	0.1819	6458.28	0.0203244	6458.28	-0.00285	6458.28	-0.00227822	6458.28	-0.000215747	5981.76	-0.00280171	6458.28	0.0748	6458.28	0.0139	6458.28	-0.000324705	6458.28	0.12774
6451.65	-0.000403407	6451.65	0.00143	6451.65	0.00155213	6451.65	0.1826	6451.65	0.0195449	6451.65	-0.0019	6451.65	-0.00193502	6451.65	0.00152238	5976.11	-0.00260636	6451.65	0.0748	6451.65	0.0121	6451.65	-0.000349646	6451.65	0.12596
6445.04	-0.00191	6445.04	0.00084065	6445.04	0.00149743	6445.04	0.1812	6445.04	0.0186664	6445.04	-0.00215	6445.04	-0.00299192	6445.04	0.00139668	5970.51	-0.00205502	6445.04	0.0755	6445.04	0.0111	6445.04	-0.000374587	6445.04	0.12749
6438.49	-0.00182	6438.49	0.00194	6438.49	0.00264245	6438.49	0.18	6438.49	0.0184919	6438.49	-0.00219	6438.49	-0.00314917	6438.49	0.000314975	5964.91	-0.00127486	6438.49	0.0756	6438.49	0.0104	6438.49	0	6438.49	0.12691
6431.9	-3.20445e-05	6431.9	0.00515	6431.9	0.00338775	6431.9	0.1787	6431.9	0.0190154	6431.9	-0.00254	6431.9	-0.00240624	6431.9	0.000299446	5959.3	-0.00234752	6431.9	0.0774	6431.9	0.009	6431.9	0.00114932	6431.9	0.12443
6425.33	-0.00134	6425.33	0.00506	6425.33	0.00433305	6425.33	0.1775	6425.33	0.0198398	6425.33	-0.00299	6425.33	-0.0030634	6425.33	0.000554665	5953.73	-0.00400134	6425.33	0.0787	6425.33	0.0089	6425.33	0.00209864	6425.33	0.12295
6418.77	-0.00155	6418.77	0.00577	6418.77	0.00617835	6418.77	0.1762	6418.77	0.0200652	6418.77	-0.00324	6418.77	-0.00332064	6418.77	0.000932252	5948.17	-0.00539446	6418.77	0.0793	6418.77	0.009	6418.77	0.00244795	6418.77	0.12167
6412.23	-0.00206	6412.23	0.00478	6412.23	0.00762366	6412.23	0.1757	6412.23	0.0184915	6412.23	-0.00289	6412.23	-0.00397797	6412.23	-0.00241328	5942.58	-0.00647868	6412.23	0.0798	6412.23	0.0092	6412.23	0.00229727	6412.23	0.12029
6405.74	-0.00178	6405.74	0.00338	6405.74	0.00996867	6405.74	0.1743	6405.74	0.0169218	6405.74	-0.00314	6405.74	-0.00353566	6405.74	-0.00221757	5937.04	-0.00726013	6405.74	0.0793	6405.74	0.0086	6405.74	0.00185068	6405.74	0.11631
6399.22	-0.00179	6399.22	0.00519	6399.22	0.012014	6399.22	0.1749	6399.22	0.0146501	6399.22	-0.00279	6399.22	-0.00439316	6399.22	-0.00218688	5931.51	-0.00771984	6399.22	0.0796	6399.22	0.0089	6399.22	0	6399.22	0.11334
6392.72	-0.0021	6392.72	0.0076	6392.72	0.0157593	6392.72	0.1731	6392.72	0.0115793	6392.72	-0.00284	6392.72	-0.00395076	6392.72	-0.0010335	5926	-0.00785777	6392.72	0.0807	6392.72	0.0087	6392.72	0.000236345	6392.72	0.10946
6386.27	-0.00182	6386.27	0.0062	6386.27	0.0200043	6386.27	0.172	6386.27	0.0108125	6386.27	-0.00329	6386.27	-0.0037087	6386.27	3.8611e-05	5920.45	-0.00765762	6386.27	0.0821	6386.27	0.0091	6386.27	-0.000236345	6386.27	0.10278
6379.79	-0.00263	6379.79	0.00691	6379.79	0.0249496	6379.79	0.1708	6379.79	0.00814363	6379.79	-0.00334	6379.79	-0.00276646	6379.79	-0.00174241	5914.95	-0.00716586	6379.79	0.0817	6379.79	0.0102	6379.79	-0.0009	6379.79	0.0969
6373.32	-0.00195	6373.32	0.00302	6373.32	0.0311949	6373.32	0.1699	6373.32	0.00647572	6373.32	-0.00379	6373.32	-0.00292431	6373.32	-0.00182666	5909.47	-0.00636924	6373.32	0.0828	6373.32	0.0096	6373.32	-0.00236366	6373.32	0.09052
6366.91	-0.00317	6366.91	0.00243	6366.91	0.0344399	6366.91	0.169	6366.91	0.0045117	6366.91	-0.00334	6366.91	-0.00208251	6366.91	-0.000815734	5903.99	-0.00527286	6366.91	0.0832	6366.91	0.0106	6366.91	-0.00363634	6366.91	0.08474
6360.47	-0.00308	6360.47	0.00163	6360.47	0.0389852	6360.47	0.1685	6360.47	0.00264567	6360.47	-0.00269	6360.47	-0.00244053	6360.47	-0.000324191	5898.52	-0.00388092	6360.47	0.0829	6360.47	0.0101	6360.47	-0.0041	6360.47	0.07856
6354.05	-0.0037	6354.05	0.00204	6354.05	0.0424305	6354.05	0.169	6354.05	0.000880593	6354.05	-0.00314	6354.05	-0.00249863	6354.05	-0.00119463	5893.06	0.00220514	6354.05	0.082	6354.05	0.0107	6354.05	-0.00366366	6354.05	0.07208
6347.67	-0.00422	6347.67	0.00125	6347.67	0.0466755	6347.67	0.1673	6347.67	1.93682e-05	6347.67	-0.00229	6347.67	-0.00245708	6347.67	-0.0030625			6347.67	0.0832	6347.67	0.011	6347.67	-0.00213634	6347.67	0.0671
6341.27	-0.00413	6341.27	0.00216	6341.27	0.0494208	6341.27	0.1676	6341.27	0.000156157	6341.27	-0.00234	6341.27	-0.00181535	6341.27	-0.00241619			6341.27	0.0825	6341.27	0.0115	6341.27	0	6341.27	0.06022
6334.93	-0.00475	6334.93	0.00376	6334.93	0.0531659	6334.93	0.1674	6334.93	0.00109287	6334.93	-0.00169	6334.93	-0.00317397	6334.93	-0.000308968			6334.93	0.0836	6334.93	0.0121	6334.93	6.77895e-05	6334.93	0.05684
6328.55	-0.00397	6328.55	0.00467	6328.55	0.0567112	6328.55	0.1667	6328.55	0.00315423	6328.55	-0.00224	6328.55	-0.00303241	6328.55	0.000874386			6328.55	0.0838	6328.55	0.012	6328.55	3.22105e-05	6328.55	0.05386
6322.23	-0.00329	6322.23	0.00417	6322.23	0.0605562	6322.23	0.1673	6322.23	0.00661176	6322.23	-0.00199	6322.23	-0.00329119	6322.23	0.00274286			6322.23	0.0855	6322.23	0.0125	6322.23	0	6322.23	0.04939
6315.88	-0.00261	6315.88	0.00498	6315.88	0.0634015	6315.88	0.1665	6315.88	0.00917127	6315.88	-0.00305	6315.88	-0.0025498	6315.88	0.00175292			6315.88	0.0856	6315.88	0.0113	6315.88	0.000140101	6315.88	0.04751
6309.59	-0.00274	6309.59	0.00428	6309.59	0.0637465	6309.59	0.1668	6309.59	0.011827	6309.59	-0.0033	6309.59	-0.00270875	6309.59	0.000319309			6309.59	0.0848	6309.59	0.011	6309.59	0.00097995	6309.59	0.04313
6303.26	-0.00216	6303.26	0.00395	6303.26	0.0630918	6303.26	0.1663	6303.26	0.0150846	6303.26	-0.00315	6303.26	-0.00306752	6303.26	-0.000274055			6303.26	0.0855	6303.26	0.0114	6303.26	0.00122005	6303.26	0.03905
6296.99	-0.00308	6296.99	0.0034	6296.99	0.0602368	6296.99	0.1654	6296.99	0.0173385	6296.99	-0.0021	6296.99	-0.00362663	6296.99	-0.000982731			6296.99	0.0856	6296.99	0.0125	6296.99	0.000759899	6296.99	0.03507
6290.69	-0.004	6290.69	0.00495	6290.69	0.0553821	6290.69	0.1649	6290.69	0.0183944	6290.69	-0.00205	6290.69	-0.00408556	6290.69	-0.000546697			6290.69	0.0863	6290.69	0.0131	6290.69	0	6290.69	0.03459
6284.45	-0.00373	6284.45	0.00501	6284.45	0.0494271	6284.45	0.1655	6284.45	0.0182465	6284.45	-0.0014	6284.45	-0.00264484	6284.45	-0.000333114			6284.45	0.0863	6284.45	0.0129	6284.45	-0.000432421	6284.45	0.03271
6278.21	-0.00395	6278.21	0.00486	6278.21	0.0446722	6278.21	0.1658	6278.21	0.0199976	6278.21	-0.00255	6278.21	-0.00300419	6278.21	0.000692442			6278.21	0.0869	6278.21	0.014	6278.21	-0.000464842	6278.21	0.03223
6271.95	-0.00338	6271.95	0.00452	6271.95	0.0388175	6271.95	0.1651	6271.95	0.0186508	6271.95	-0.00251	6271.95	-0.00196337	6271.95	0.000446895			6271.95	0.0876	6271.95	0.0135	6271.95	-0.0001	6271.95	0.03215
6265.74	-0.0032	6265.74	0.00457	6265.74	0.0360625	6265.74	0.1654	6265.74	0.0175002	6265.74	-0.00216	6265.74	-0.00262289	6265.74	0.000943596			6265.74	0.0872	6265.74	0.0138	6265.74	6.75789e-05	6265.74	0.03167
6259.55	-0.00223	6259.55	0.00632	6259.55	0.0338075	6259.55	0.1642	6259.55	0.0168487	6259.55	-0.00221	6259.55	-0.00258249	6259.55	-8.50328e-05			6259.55	0.0875	6259.55	0.0142	6259.55	-0.000164842	6259.55	0.03149
6253.32	-0.00235	6253.32	0.00538	6253.32	0.0318528	6253.32	0.1645	6253.32	0.0141991	6253.32	-0.00196	6253.32	-0.00174191	6253.32	0.000165295			6253.32	0.0881	6253.32	0.0144	6253.32	0	6253.32	0.03321
6247.15	-0.00128	6247.15	0.00603	6247.15	0.0303978	6247.15	0.1662	6247.15	0.0146458	6247.15	-0.00211	6247.15	-0.00260167	6247.15	0.00243138			6247.15	0.0872	6247.15	0.0158	6247.15	0.000521574	6247.15	0.03453
6240.99	-0.00131	6240.99	0.00548	6240.99	0.0284428	6240.99	0.1655	6240.99	0.0144917	6240.99	-0.00277	6240.99	-0.0016615	6240.99	0.00189422			6240.99	0.0873	6240.99	0.0162	6240.99	0.000443148	6240.99	0.03635
6234.84	-0.00184	6234.84	0.00413	6234.84	0.0261878	6234.84	0.1651	6234.84	0.0149366	6234.84	-0.00252	6234.84	-0.00132142	6234.84	0.000350078			6234.84	0.0876	6234.84	0.0165	6234.84	-0.000235278	6234.84	0.03427
6228.67	-0.00117	6228.67	0.00359	6228.67	0.0239332	6228.67	0.1654	6228.67	0.0156835	6228.67	-0.00227	6228.67	-0.00198116	6228.67	0.00128682			6228.67	0.0877	6228.67	0.0179	6228.67	-0.00110787	6228.67	0.03479
6222.54	-0.000496264	6222.54	0.00474	6222.54	0.0225782	6222.54	0.1662	6222.54	0.0184267	6222.54	-0.00222	6222.54	-0.000841232	6222.54	0.00147545			6222.54	0.0866	6222.54	0.0174	6222.54	-0.0017863	6222.54	0.03331
6216.43	-0.00193	6216.43	0.00569	6216.43	0.0200232	6216.43	0.1648	6216.43	0.0211691	6216.43	-0.00188	6216.43	-0.00200138	6216.43	0.00084849			6216.43	0.0867	6216.43	0.0172	6216.43	-0.00216472	6216.43	0.02963
6210.33	-0.00186	6210.33	0.00325	6210.33	0.0176682	6210.33	0.1651	6210.33	0.0231106	6210.33	-0.00143	6210.33	-0.00106161	6210.33	0.000868783			6210.33	0.0874	6210.33	0.0169	6210.33	-0.00174315	6210.33	0.02885
6204.24	-0.00219	6204.24	0.0033	6204.24	0.0156132	6204.24	0.1641	6204.24	0.0251512	6204.24	-0.00178	6204.24	-0.00262192	6204.24	-0.000629013			6204.24	0.0881	6204.24	0.0168	6204.24	-0.000621574	6204.24	0.02807
6198.17	-0.00282	6198.17	0.00315	6198.17	0.0134582	6198.17	0.164	6198.17	0.0275909	6198.17	-0.00123	6198.17	-0.00338231	6198.17	-0.00142913			6198.17	0.089	6198.17	0.0181	6198.17	0	6198.17	0.02579
6192.1	-0.00285	6192.1	0.0035	6192.1	0.0117033	6192.1	0.1626	6192.1	0.0290298	6192.1	-0.00109	6192.1	-0.00314277	6192.1	-0.00191553			6192.1	0.0902	6192.1	0.0178	6192.1	-0.000932666	6192.1	0.02491
6186.01	-0.00328	6186.01	0.00126	6186.01	0.0103486	6186.01	0.1613	6186.01	0.0289706	6186.01	-0.000540039	6186.01	-0.00330306	6186.01	-0.00196579			6186.01	0.0917	6186.01	0.0175	6186.01	-0.00186934	6186.01	0.02173
6179.97	-0.00311	6179.97	-0.000489868	6179.97	0.00939358	6179.97	0.1614	6179.97	0.0288078	6179.97	-0.000193268	6179.97	-0.00316368	6179.97	-0.00161755			6179.97	0.0929	6179.97	0.0186	6179.97	-0.002102	6179.97	0.02095
6173.94	-0.0034	6173.94	0.000461876	6173.94	0.00863859	6173.94	0.1574	6173.94	0.0263441	6173.94	0.000153411	6173.94	-0.00322437	6173.94	-9.37972e-05			6173.94	0.0944	6173.94	0.0189	6173.94	-0.00163467	6173.94	0.01677
6167.93	-0.00308	6167.93	0.00081362	6167.93	0.00868361	6167.93	0.159	6167.93	0.0243795	6167.93	0	6167.93	-0.00328515	6167.93	0.000701775			6167.93	0.0943	6167.93	0.0205	6167.93	-0.000567334	6167.93	0.01529
6161.92	-0.00368	6161.92	-0.000934636	6161.92	0.00762863	6161.92	0.158	6161.92	0.0203141	6161.92	0.000138268	6161.92	-0.00334599	6161.92	0.00120311			6161.92	0.0945	6161.92	0.0208	6161.92	0	6161.92	0.01251
6155.93	-0.00227	6155.93	-0.00228	6155.93	0.00927365	6155.93	0.1573	6155.93	0.0176479	6155.93	-0.000922566	6155.93	-0.00400692	6155.93	0.00304528			6155.93	0.0956	6155.93	0.023	6155.93	-0.000386606	6155.93	0.01073
6149.95	-0.00156	6149.95	-3.11481e-05	6149.95	0.00971866	6149.95	0.1567	6149.95	0.0156808	6149.95	-0.000782504	6149.95	-0.00446792	6149.95	0.00250202			6149.95	0.0965	6149.95	0.0238	6149.95	-0.00107321	6149.95	0.01055
6143.98	-0.000954613	6143.98	0.000120596	6143.98	0.0102637	6143.98	0.1566	6143.98	0.0133129	6143.98	-0.00104	6143.98	-0.00472899	6143.98	0.00262474			6143.98	0.0977	6143.98	0.0246	6143.98	-0.00195982	6143.98	0.00916
6138.02	-0.00135	6138.02	-0.000771133	6138.02	0.0120087	6138.02	0.1553	6138.02	0.0117442	6138.02	-0.000699705	6138.02	-0.00449015	6138.02	0.00184138			6138.02	0.0982	6138.02	0.0265	6138.02	-0.00204643	6138.02	0.00858
6132.11	-0.00135	6132.11	0.00026336	6132.11	0.0128534	6132.11	0.1552	6132.11	0.0106719	6132.11	-0.00155	6132.11	-0.00505162	6132.11	0.00258653			6132.11	0.0992	6132.11	0.0279	6132.11	-0.00112679	6132.11	0.0056
6126.17	-0.000750907	6126.17	0.000293615	6126.17	0.0135984	6126.17	0.1545	6126.17	0.00800144	6126.17	-0.00211	6126.17	-0.00381292	6126.17	0.00705005			6126.17	0.1003	6126.17	0.0303	6126.17	-0.000213394	6126.17	0.00422
6120.25	0.000149096	6120.25	0.00142	6120.25	0.0140435	6120.25	0.1556	6120.25	0.0090302	6120.25	-0.00257	6120.25	-0.00487429	6120.25	0.0059251			6120.25	0.1025	6120.25	0.0327	6120.25	0	6120.25	0.00434
6114.34	0.000347748	6114.34	0.00185	6114.34	0.0151885	6114.34	0.154	6114.34	0.00795812	6114.34	-0.00322	6114.34	-0.00363574	6114.34	0.00783181			6114.34	0.1037	6114.34	0.035	6114.34	-0.000344525	6114.34	0.00566
6108.44	-0.000254949	6108.44	-0.000815623	6108.44	0.0147335	6108.44	0.1528	6108.44	0.00778522	6108.44	-0.0023	6108.44	-0.00469727	6108.44	0.00919727			6108.44	0.1061	6108.44	0.0409	6108.44	-0.00058905	6108.44	0.00448
6102.55	-0.00206	6102.55	-0.00109	6102.55	0.0135785	6102.55	0.1497	6102.55	0.00531149	6102.55	-0.00185	6102.55	-0.00405887	6102.55	0.00908877			6102.55	0.1119	6102.55	0.0514	6102.55	-0.000233575	6102.55	0.0054
6096.67	-0.00476	6096.67	0.00164	6096.67	0.0111235	6096.67	0.1473	6096.67	0.00223695	6096.67	9.39167e-05	6096.67	-0.00452054	6096.67	0.0068502			6096.67	0.1217	6096.67	0.0719	6096.67	-0.0003781	6096.67	0.00952
6090.84	-0.00848	6090.84	0.000779379	6090.84	0.00906827	6090.84	0.144	6090.84	5.8895e-05	6090.84	0.00194	6090.84	-0.00498253	6090.84	0.00341669			6090.84	0.1362	6090.84	0.0951	6090.84	-0.00021095	6090.84	0.01504
6084.98	-0.01138	6084.98	-0.00119	6084.98	0.00741329	6084.98	0.1414	6084.98	-0.00171728	6084.98	0.00369	6084.98	-0.00304435	6084.98	0.00250831			6084.98	0.151	6084.98	0.123	6084.98	-0.000355475	6084.98	0.01826
6079.14	-0.01439	6079.14	-0.00126	6079.14	0.0055583	6079.14	0.1397	6079.14	-0.00289427	6079.14	0.00533	6079.14	-0.00370624	6079.14	-0.000207795			6079.14	0.1618	6079.14	0.1419	6079.14	0	6079.14	0.02368
6073.3	-0.0135	6073.3	-0.000829858	6073.3	0.00500332	6073.3	0.1382	6073.3	-0.00247208	6073.3	0.00558	6073.3	-0.00246821	6073.3	-0.000235723			6073.3	0.1697	6073.3	0.1537	6073.3	0.000730444	6073.3	0.02469
6067.52	-0.01262	6067.52	-0.0014	6067.52	0.00424805	6067.52	0.1366	6067.52	-0.000953354	6067.52	0.00523	6067.52	-0.00243049	6067.52	-0.00133882			6067.52	0.177	6067.52	0.1659	6067.52	0.00166956	6067.52	0.02821
6061.71	-0.01103	6061.71	-0.0016	6061.71	0.00459307	6061.71	0.1357	6061.71	-0.00132514	6061.71	0.00587	6061.71	-0.0026926	6061.71	0.000225142			6061.71	0.1793	6061.71	0.1731	6061.71	0.0017	6061.71	0.02923
6055.91	-0.00925	6055.91	-0.000213108	6055.91	0.00363809	6055.91	0.1368	6055.91	-0.00184492	6055.91	0.00532	6055.91	-0.00225479	6055.91	0.000688352			6055.91	0.179	6055.91	0.1749	6055.91	0.00133044	6055.91	0.03105
6050.16	-0.00677	6050.16	0.000662925	6050.16	0.00438282	6050.16	0.1373	6050.16	-0.00116125	6050.16	0.00426	6050.16	-0.00281728	6050.16	0.000211513			6050.16	0.1773	6050.16	0.1692	6050.16	0.000669556	6050.16	0.03367
6044.38	-0.00449	6044.38	0.000753455	6044.38	0.00372784	6044.38	0.1392	6044.38	-0.000679431	6044.38	0.00311	6044.38	-0.00177961	6044.38	0.0015524			6044.38	0.1741	6044.38	0.1621	6044.38	0	6044.38	0.03539
6038.65	-0.00331	6038.65	0.000329489	6038.65	0.00407257	6038.65	0.1399	6038.65	-0.000194176	6038.65	0.00295	6038.65	-0.00184225	6038.65	0.00248084			6038.65	0.173	6038.65	0.1586	6038.65	0.000276984	6038.65	0.03461
6032.89	-0.00103	6032.89	0.00172	6032.89	0.00265209	6032.89	0.1404	6032.89	0.00108923	6032.89	0.0016	6032.89	-0.00270472	6032.89	0.00340424			6032.89	0.1731	6032.89	0.1581	6032.89	0.00105	6032.89	0.03543
6027.15	5.06759e-05	6027.15	0.00101	6027.15	0.00392716	6027.15	0.1412	6027.15	0.00177343	6027.15	0.00184	6027.15	-0.00146726	6027.15	0.00495404			6027.15	0.1719	6027.15	0.154	6027.15	0.00162302	6027.15	0.03824
6021.45	0.00192	6021.45	0.00149	6021.45	0.00250303	6021.45	0.1413	6021.45	0.00266104	6021.45	0.00128	6021.45	-0.00283011	6021.45	0.00648573			6021.45	0.172	6021.45	0.1492	6021.45	0.0024	6021.45	0.04146
6015.73	0.00336	6015.73	0.00198	6015.73	0.00297811	6015.73	0.1433	6015.73	0.00314682	6015.73	0.00143	6015.73	-0.00199279	6015.73	0.00794587			6015.73	0.1722	6015.73	0.1453	6015.73	0.00237302	6015.73	0.04418
6010.05	0.00364	6010.05	0.00325	6010.05	0.00195397	6010.05	0.1441	6010.05	0.00283599	6010.05	0.00177	6010.05	-0.00295579	6010.05	0.00442323			6010.05	0.1775	6010.05	0.1441	6010.05	0.00185	6010.05	0.0508
6004.35	0.00422	6004.35	0.00534	6004.35	0.000829049	6004.35	0.1445	6004.35	0.00202333	6004.35	0.00181	6004.35	-0.00211861	6004.35	0.00405902			6004.35	0.1815	6004.35	0.1447	6004.35	0.000923016	6004.35	0.05692
5998.69	0.0045	5998.69	0.00732	5998.69	0.000804916	5998.69	0.1439	5998.69	0.00231406	5998.69	0.00205	5998.69	-0.00218174	5998.69	0.00361825			5998.69	0.1903	5998.69	0.1436	5998.69	0	5998.69	0.06474
5993.01	0.00607	5993.01	0.00871	5993.01	0.000179993	5993.01	0.1454	5993.01	0.00280296	5993.01	0.0025	5993.01	-0.00144471	5993.01	0.00540878			5993.01	0.1923	5993.01	0.1394	5993.01	-0.000190343	5993.01	0.06936
5987.38	0.00774	5987.38	0.00919	5987.38	0.00055586	5987.38	0.1462	5987.38	0.00299523	5987.38	0.00234	5987.38	-0.00270798	5987.38	0.00225914			5987.38	0.1961	5987.38	0.1351	5987.38	-0.000880114	5987.38	0.07357
5981.76	0.00941	5981.76	0.00686	5981.76	-0.000268273	5981.76	0.1486	5981.76	0.00428827	5981.76	0.00228	5981.76	-0.00147132	5981.76	0.00437959			5981.76	0.1966	5981.76	0.1256	5981.76	-0.00136989	5981.76	0.07489
5976.11	0.01019	5976.11	0.00605	5976.11	0.0011068	5976.11	0.1478	5976.11	0.00457948	5976.11	0.00172	5976.11	-0.00243449	5976.11	0.00765081			5976.11	0.1953	5976.11	0.1129	5976.11	-0.00216023	5976.11	0.07801
5970.51	0.01095	5970.51	0.00663	5970.51	0.00038267	5970.51	0.1495	5970.51	0.00637405	5970.51	0.00216	5970.51	-0.000397968	5970.51	0.00704401			5970.51	0.1914	5970.51	0.0924	5970.51	-0.00255	5970.51	0.07963
5964.91	0.01242	5964.91	0.0072	5964.91	0.00185854	5964.91	0.1505	5964.91	0.00546937	5964.91	0.002	5964.91	0.000438487	5964.91	0.010559			5964.91	0.1909	5964.91	0.0782	5964.91	-0.00323977	5964.91	0.08595
5959.3	0.01209	5959.3	0.00377	5959.3	0.00123361	5959.3	0.1503	5959.3	0.00606288	5959.3	0.00204	5959.3	-0.000724894	5959.3	0.00672313			5959.3	0.1959	5959.3	0.065	5959.3	-0.00293011	5959.3	0.08257
5953.73	0.01105	5953.73	0.00268	5953.73	0.00180948	5953.73	0.1486	5953.73	0.00495973	5953.73	0.00238	5953.73	0.000911424	5953.73	0.00755349			5953.73	0.2041	5953.73	0.0589	5953.73	-0.00211989	5953.73	0.08288
5948.17	0.01051	5948.17	0.0039	5948.17	0.00191781	5948.17	0.1467	5948.17	0.00335732	5948.17	0.00312	5948.17	-0.00215233	5948.17	0.00813796			5948.17	0.2144	5948.17	0.0573	5948.17	-0.00130966	5948.17	0.0828
5942.58	0.00978	5942.58	0.00351	5942.58	0.00101201	5942.58	0.1443	5942.58	0.00185311	5942.58	0.00246	5942.58	0.000584088	5942.58	0.00785107			5942.58	0.2213	5942.58	0.0555	5942.58	0	5942.58	0.08602
5937.04	0.00943	5937.04	0.00392	5937.04	0.00151132	5937.04	0.1428	5937.04	-0.000847786	5937.04	0.0033	5937.04	-0.0011798	5937.04	0.00754667			5937.04	0.228	5937.04	0.0515	5937.04	-0.00102852	5937.04	0.08244
5931.51	0.00809	5931.51	0.00263	5931.51	0.00211063	5931.51	0.1412	5931.51	-0.00224794	5931.51	0.00434	5931.51	0.00065625	5931.51	0.00652619			5931.51	0.2319	5931.51	0.0459	5931.51	-0.00115703	5931.51	0.08326
5926	0.00795	5926	0.00294	5926	0.00220994	5926	0.1406	5926	-0.00445631	5926	0.00248	5926	-0.00160777	5926	0.00723229			5926	0.2324	5926	0.04	5926	-0.00238555	5926	0.07547
5920.45	0.00591	5920.45	0.000452115	5920.45	0.00100415	5920.45	0.1368	5920.45	-0.00450316	5920.45	0.00252	5920.45	-0.00107163	5920.45	0.00462911			5920.45	0.2319	5920.45	0.0355	5920.45	-0.0025289	5920.45	0.07339
5914.95	0.00386	5914.95	6.40866e-05	5914.95	0.00390346	5914.95	0.1357	5914.95	-0.00365861	5914.95	0.00146	5914.95	-0.00303578	5914.95	0.00654548			5914.95	0.2312	5914.95	0.0349	5914.95	-0.00375742	5914.95	0.07261
5909.47	0.00411	5909.47	-0.000323942	5909.47	0.00200277	5909.47	0.1346	5909.47	-0.00591601	5909.47	0.00309	5909.47	0	5909.47	0.00772448			5909.47	0.2327	5909.47	0.0252	5909.47	-0.00438593	5909.47	0.07223
5903.99	0.00136	5903.99	0.000188029	5903.99	0.00200207	5903.99	0.1309	5903.99	-0.00567534	5903.99	0.000432064	5903.99	-0.00216429	5903.99	0.00376517			5903.99	0.2401	5903.99	0.0256	5903.99	-0.00351445	5903.99	0.07684
5898.52	0.00211	5898.52	0	5898.52	0.00330138	5898.52	0.1297	5898.52	-0.00503659	5898.52	0.00297	5898.52	-0.00222864	5898.52	0.00192817			5898.52	0.248	5898.52	0.0247	5898.52	-0.00254297	5898.52	0.08246
5893.06	0.000154333	5893.06	-0.00139	5893.06	0.00100069	5893.06	0.125	5893.06	-0.00339977	5893.06	0.00121	5893.06	-9.30569e-05	5893.06	0.00607364			5893.06	0.254	5893.06	0.0265	5893.06	-0.00167148	5893.06	0.08368
5887.62	0	5887.62	-0.00128	5887.62	0	5887.62	0.1267	5887.62	-0.00426487	5887.62	0.00264	5887.62	-0.00375754	5887.62	-0.000128753			5887.62	0.2645	5887.62	0.0235	5887.62	0	5887.62	0.0922

## Sheet: Solution State UV-Vis-NIR
cm^-1	Ce	cm^-1	Eu	cm^-1	Am1	cm^-1	Am2
5882.35	-0.00127906	5882.35	-0.00146314	5882.35	0.00746	5882.35	0.0073462
5883.39	-0.00117529	5883.39	-0.001678	5882.7	0.00759	5882.7	0.00737961
5884.43	-0.00124483	5884.43	-0.00163086	5883.04	0.00756	5883.04	0.00745581
5885.47	-0.00118231	5885.47	-0.00159258	5883.39	0.00749	5883.39	0.00735602
5886.51	-0.00117751	5886.51	-0.00167825	5883.74	0.00737	5883.74	0.00722066
5887.55	-0.00100089	5887.55	-0.00169929	5884.08	0.00753	5884.08	0.00726806
5888.59	-0.00084172	5888.59	-0.00159305	5884.43	0.00742	5884.43	0.00729686
5889.63	-0.000833969	5889.63	-0.00150705	5884.78	0.00744	5884.78	0.0072841
5890.67	-0.000764619	5890.67	-0.00163632	5885.12	0.00728	5885.12	0.00717042
5891.71	-0.000681147	5891.71	-0.0015328	5885.47	0.00728	5885.47	0.00718855
5892.75	-0.000703735	5892.75	-0.00159341	5885.82	0.00718	5885.82	0.00710921
5893.79	-0.000638655	5893.79	-0.00149524	5886.16	0.0072	5886.16	0.00708219
5894.84	-0.000626661	5894.84	-0.00154327	5886.51	0.00716	5886.51	0.00712589
5895.88	-0.000571807	5895.88	-0.00149617	5886.85	0.00707	5886.85	0.00697758
5896.92	-0.000441597	5896.92	-0.00144622	5887.2	0.00704	5887.2	0.00694678
5897.97	-0.000498278	5897.97	-0.00151458	5887.55	0.00707	5887.55	0.00696464
5899.01	-0.000370943	5899.01	-0.00143734	5887.89	0.007	5887.89	0.00694741
5900.05	-0.000408599	5900.05	-0.00149658	5888.24	0.00706	5888.24	0.00693587
5901.1	-0.000310055	5901.1	-0.0013894	5888.59	0.00707	5888.59	0.00700521
5902.14	-0.000230117	5902.14	-0.00141258	5888.93	0.00697	5888.93	0.006881
5903.19	-0.000249624	5903.19	-0.0013188	5889.28	0.00693	5889.28	0.00678589
5904.23	-0.00017573	5904.23	-0.00140628	5889.63	0.00697	5889.63	0.00696264
5905.28	-0.00020383	5905.28	-0.00133103	5889.98	0.00685	5889.98	0.00694925
5906.33	-8.92974e-05	5906.33	-0.00128143	5890.32	0.0069	5890.32	0.00685962
5907.37	-4.3538e-05	5907.37	-0.00130388	5890.67	0.007	5890.67	0.00692058
5908.42	-4.93876e-05	5908.42	-0.00116377	5891.02	0.0069	5891.02	0.00688934
5909.47	6.61696e-05	5909.47	-0.00112882	5891.36	0.00686	5891.36	0.00678476
5910.51	-2.17437e-05	5910.51	-0.00115004	5891.71	0.00685	5891.71	0.006844
5911.56	0.000122587	5911.56	-0.0011078	5892.06	0.00688	5892.06	0.00689089
5912.61	0.000201621	5912.61	-0.00112231	5892.4	0.00684	5892.4	0.00687998
5913.66	0.000207655	5913.66	-0.000978835	5892.75	0.00693	5892.75	0.00695065
5914.71	0.000241221	5914.71	-0.000964165	5893.1	0.00692	5893.1	0.00694986
5915.76	0.00026347	5915.76	-0.000910748	5893.45	0.00678	5893.45	0.00681129
5916.81	0.00034828	5916.81	-0.000880059	5893.79	0.00685	5893.79	0.00686817
5917.86	0.000342011	5917.86	-0.000852106	5894.14	0.00682	5894.14	0.00686906
5918.91	0.000407921	5918.91	-0.000736607	5894.49	0.00678	5894.49	0.00684779
5919.96	0.000391417	5919.96	-0.000710351	5894.84	0.00681	5894.84	0.00683275
5921.01	0.000406989	5921.01	-0.000690192	5895.18	0.00676	5895.18	0.0067968
5922.07	0.000472495	5922.07	-0.000530855	5895.53	0.0068	5895.53	0.00678773
5923.12	0.000483742	5923.12	-0.000516946	5895.88	0.00685	5895.88	0.00684397
5924.17	0.000672987	5924.17	-0.000401099	5896.23	0.00679	5896.23	0.00678844
5925.22	0.000681983	5925.22	-0.000189133	5896.57	0.00669	5896.57	0.00677224
5926.28	0.000752639	5926.28	-0.000297431	5896.92	0.00682	5896.92	0.00679346
5927.33	0.00084224	5927.33	-5.22865e-05	5897.27	0.00681	5897.27	0.00681152
5928.38	0.000919069	5928.38	0.000134731	5897.62	0.00684	5897.62	0.00685765
5929.44	0.00101763	5929.44	0.00015234	5897.97	0.00673	5897.97	0.0067353
5930.49	0.000880834	5930.49	0.000244691	5898.31	0.00671	5898.31	0.00666414
5931.55	0.000833032	5931.55	0.000334342	5898.66	0.00679	5898.66	0.00676101
5932.61	0.00123696	5932.61	0.000655176	5899.01	0.00678	5899.01	0.00673659
5933.66	0.00117754	5933.66	0.000662876	5899.36	0.0068	5899.36	0.00678168
5934.72	0.00124171	5934.72	0.000838972	5899.71	0.00675	5899.71	0.00678055
5935.78	0.00158197	5935.78	0.000994668	5900.05	0.00682	5900.05	0.00675597
5936.83	0.00157405	5936.83	0.00142256	5900.4	0.0068	5900.4	0.0066822
5937.89	0.001354	5937.89	0.00186403	5900.75	0.00685	5900.75	0.00676354
5938.95	0.00178501	5938.95	0.00200558	5901.1	0.00686	5901.1	0.00683051
5940.01	0.00206491	5940.01	0.00245803	5901.45	0.00686	5901.45	0.00675852
5941.06	0.00185249	5941.06	0.00294093	5901.79	0.00684	5901.79	0.00677524
5942.12	0.00208499	5942.12	0.00295521	5902.14	0.00689	5902.14	0.00682191
5943.18	0.00252989	5943.18	0.0042882	5902.49	0.00685	5902.49	0.0067363
5944.24	0.00244692	5944.24	0.00465995	5902.84	0.00693	5902.84	0.00677908
5945.3	0.00250547	5945.3	0.00431915	5903.19	0.00695	5903.19	0.00677689
5946.36	0.00296498	5946.36	0.00582799	5903.54	0.00695	5903.54	0.00679709
5947.42	0.00267783	5947.42	0.00556078	5903.88	0.00695	5903.88	0.00678957
5948.49	0.00291922	5948.49	0.00649907	5904.23	0.00695	5904.23	0.00680508
5949.55	0.00309034	5949.55	0.00641854	5904.58	0.00695	5904.58	0.0067678
5950.61	0.00420533	5950.61	0.00836743	5904.93	0.00696	5904.93	0.00672936
5951.67	0.00403124	5951.67	0.00791335	5905.28	0.00702	5905.28	0.00680805
5952.74	0.00424334	5952.74	0.00749626	5905.63	0.00701	5905.63	0.00681494
5953.8	0.00319435	5953.8	0.00727133	5905.98	0.00704	5905.98	0.0067572
5954.86	0.00138436	5954.86	0.00383089	5906.33	0.00706	5906.33	0.00680695
5955.93	-0.00060898	5955.93	0.00176881	5906.67	0.00703	5906.67	0.00680929
5956.99	-0.0013091	5956.99	-0.00179613	5907.02	0.00705	5907.02	0.00673877
5958.06	-0.0033689	5958.06	-0.0040571	5907.37	0.0071	5907.37	0.00678499
5959.12	-0.00432875	5959.12	-0.00271722	5907.72	0.00712	5907.72	0.00683485
5960.19	-0.00379806	5960.19	-0.00455899	5908.07	0.00718	5908.07	0.00681418
5961.25	-0.00531395	5961.25	-0.00404007	5908.42	0.00718	5908.42	0.00680445
5962.32	-0.00461186	5962.32	-0.00381284	5908.77	0.00719	5908.77	0.00684634
5963.38	-0.0049104	5963.38	-0.00327879	5909.12	0.00717	5909.12	0.006813
5964.45	-0.00527891	5964.45	-0.00336787	5909.47	0.00722	5909.47	0.00681179
5965.52	-0.00444642	5965.52	-0.00317642	5909.82	0.00731	5909.82	0.00691561
5966.59	-0.00470698	5966.59	-0.00298144	5910.17	0.00727	5910.17	0.00686099
5967.66	-0.00444268	5967.66	-0.00281347	5910.51	0.00731	5910.51	0.00681087
5968.72	-0.00470237	5968.72	-0.00253058	5910.86	0.00731	5910.86	0.00688205
5969.79	-0.00448106	5969.79	-0.00214051	5911.21	0.00742	5911.21	0.00687264
5970.86	-0.00372728	5970.86	-0.00217992	5911.56	0.00738	5911.56	0.00689155
5971.93	-0.0038465	5971.93	-0.00181047	5911.91	0.0074	5911.91	0.00692177
5973	-0.00363344	5973	-0.00152201	5912.26	0.00744	5912.26	0.00697085
5974.07	-0.00338087	5974.07	-0.00147367	5912.61	0.00747	5912.61	0.00692684
5975.14	-0.00321054	5975.14	-0.0012327	5912.96	0.00748	5912.96	0.00695988
5976.21	-0.00273585	5976.21	-0.00121133	5913.31	0.0075	5913.31	0.00698377
5977.29	-0.00283574	5977.29	-0.000865489	5913.66	0.0076	5913.66	0.00700113
5978.36	-0.00254041	5978.36	-0.00072534	5914.01	0.00765	5914.01	0.00709547
5979.43	-0.00239864	5979.43	-0.000628936	5914.36	0.00763	5914.36	0.00707545
5980.5	-0.00242232	5980.5	-0.000434512	5914.71	0.00767	5914.71	0.00707653
5981.58	-0.00217672	5981.58	-0.000210919	5915.06	0.00771	5915.06	0.00711918
5982.65	-0.00216992	5982.65	-0.000170762	5915.41	0.00776	5915.41	0.0071755
5983.72	-0.00216431	5983.72	-1.48583e-05	5915.76	0.0078	5915.76	0.00716573
5984.8	-0.00205993	5984.8	0.000164536	5916.11	0.00782	5916.11	0.00722095
5985.87	-0.00218646	5985.87	0.000243707	5916.46	0.00779	5916.46	0.00717818
5986.95	-0.00216518	5986.95	0.000294993	5916.81	0.00791	5916.81	0.00721461
5988.02	-0.00222849	5988.02	0.000450675	5917.16	0.00796	5917.16	0.00726564
5989.1	-0.00232243	5989.1	0.000509839	5917.51	0.008	5917.51	0.00732556
5990.18	-0.00239024	5990.18	0.000471795	5917.86	0.00796	5917.86	0.00734041
5991.25	-0.00249624	5991.25	0.000441736	5918.21	0.00809	5918.21	0.00737795
5992.33	-0.00264647	5992.33	0.00053109	5918.56	0.0082	5918.56	0.0075221
5993.41	-0.00271249	5993.41	0.000425852	5918.91	0.00824	5918.91	0.00749892
5994.49	-0.00286655	5994.49	0.000442435	5919.26	0.00822	5919.26	0.00747119
5995.56	-0.00282011	5995.56	0.000351933	5919.61	0.0083	5919.61	0.00757802
5996.64	-0.00303928	5996.64	0.000310872	5919.96	0.00844	5919.96	0.00764883
5997.72	-0.00308159	5997.72	0.000183881	5920.31	0.00846	5920.31	0.00769895
5998.8	-0.00301666	5998.8	0.000102029	5920.66	0.00848	5920.66	0.00767681
5999.88	-0.0032052	5999.88	8.82542e-05	5921.01	0.00855	5921.01	0.00773238
6000.96	-0.00300077	6000.96	-4.66958e-05	5921.36	0.00855	5921.36	0.00770933
6002.04	-0.00305876	6002.04	-8.69164e-05	5921.72	0.00861	5921.72	0.0077703
6003.12	-0.00301013	6003.12	-0.000113521	5922.07	0.00871	5922.07	0.00782823
6004.2	-0.00294369	6004.2	-0.000165276	5922.42	0.0087	5922.42	0.007813
6005.28	-0.00294729	6005.28	-0.000289464	5922.77	0.00885	5922.77	0.00788635
6006.37	-0.00272617	6006.37	-0.000215163	5923.12	0.00907	5923.12	0.00814872
6007.45	-0.00279465	6007.45	-0.000383202	5923.47	0.00911	5923.47	0.00811214
6008.53	-0.00258431	6008.53	-0.000199328	5923.82	0.009	5923.82	0.0080856
6009.62	-0.00249022	6009.62	-0.000445683	5924.17	0.00917	5924.17	0.00822398
6010.7	-0.00260603	6010.7	-0.000235291	5924.52	0.0092	5924.52	0.00831115
6011.78	-0.0022632	6011.78	-0.000352527	5924.87	0.00933	5924.87	0.00834054
6012.87	-0.00222411	6012.87	-0.000334991	5925.22	0.00948	5925.22	0.00841206
6013.95	-0.0020997	6013.95	-0.000370167	5925.57	0.00953	5925.57	0.00837047
6015.04	-0.00196763	6015.04	-0.00029738	5925.93	0.0097	5925.93	0.00847799
6016.12	-0.00199294	6016.12	-0.000355683	5926.28	0.00961	5926.28	0.00842665
6017.21	-0.00185661	6017.21	-0.000335508	5926.63	0.00985	5926.63	0.0086945
6018.3	-0.00175009	6018.3	-0.000322626	5926.98	0.00999	5926.98	0.00877761
6019.38	-0.00173885	6019.38	-0.000350303	5927.33	0.01023	5927.33	0.00892043
6020.47	-0.00155359	6020.47	-0.000315642	5927.68	0.01032	5927.68	0.0091047
6021.56	-0.00165866	6021.56	-0.000384547	5928.03	0.01036	5928.03	0.00904639
6022.65	-0.00149539	6022.65	-0.000406323	5928.38	0.01038	5928.38	0.00893293
6023.73	-0.00146082	6023.73	-0.000369081	5928.74	0.01058	5928.74	0.00916352
6024.82	-0.00148311	6024.82	-0.000276219	5929.09	0.01074	5929.09	0.00932913
6025.91	-0.00128804	6025.91	-0.000369753	5929.44	0.01081	5929.44	0.00939972
6027	-0.00135323	6027	-0.000334835	5929.79	0.01095	5929.79	0.00940967
6028.09	-0.00131158	6028.09	-0.000291947	5930.14	0.01107	5930.14	0.00957239
6029.18	-0.00128582	6029.18	-0.000296086	5930.49	0.01129	5930.49	0.00972849
6030.27	-0.00131555	6030.27	-0.000366339	5930.85	0.01134	5930.85	0.00974104
6031.36	-0.00115551	6031.36	-0.000286463	5931.2	0.01164	5931.2	0.010109
6032.45	-0.00127389	6032.45	-0.000292361	5931.55	0.01184	5931.55	0.0100538
6033.55	-0.00116383	6033.55	-0.000315539	5931.9	0.01183	5931.9	0.0102057
6034.64	-0.00111642	6034.64	-0.000314297	5932.25	0.01219	5932.25	0.0105151
6035.73	-0.00119295	6035.73	-0.000249831	5932.61	0.01232	5932.61	0.0104225
6036.82	-0.00108255	6036.82	-0.000315073	5932.96	0.01245	5932.96	0.0106022
6037.92	-0.00108363	6037.92	-0.000247141	5933.31	0.01267	5933.31	0.0107251
6039.01	-0.00106396	6039.01	-0.000243053	5933.66	0.0128	5933.66	0.0108393
6040.11	-0.00111033	6040.11	-0.000273632	5934.01	0.01294	5934.01	0.0109051
6041.2	-0.000999187	6041.2	-0.000308348	5934.37	0.01323	5934.37	0.0112922
6042.3	-0.00101195	6042.3	-0.000240828	5934.72	0.01338	5934.72	0.0112995
6043.39	-0.00101076	6043.39	-0.000269907	5935.07	0.01366	5935.07	0.0113785
6044.49	-0.000961427	6044.49	-0.000254022	5935.42	0.01389	5935.42	0.0114533
6045.58	-0.00100099	6045.58	-0.000261577	5935.78	0.01422	5935.78	0.0116783
6046.68	-0.000964733	6046.68	-0.000171228	5936.13	0.01451	5936.13	0.0116987
6047.78	-0.00097243	6047.78	-0.000289154	5936.48	0.01453	5936.48	0.0117863
6048.88	-0.000938387	6048.88	-0.000211644	5936.83	0.01456	5936.83	0.0118373
6049.97	-0.000937767	6049.97	-0.000218992	5937.18	0.01485	5937.18	0.0120381
6051.07	-0.000964475	6051.07	-0.000242173	5937.54	0.01504	5937.54	0.0120435
6052.17	-0.000977647	6052.17	-0.000241552	5937.89	0.01524	5937.89	0.0120645
6053.27	-0.000960756	6053.27	-0.00022308	5938.24	0.01529	5938.24	0.0122505
6054.37	-0.00094376	6054.37	-0.000230634	5938.59	0.01559	5938.59	0.012397
6055.47	-0.000949701	6055.47	-0.000238137	5938.95	0.01578	5938.95	0.0126788
6056.57	-0.000930845	6056.57	-0.000216094	5939.3	0.01646	5939.3	0.0131733
6057.67	-0.000927952	6057.67	-0.000251901	5939.65	0.01674	5939.65	0.0131614
6058.77	-0.000997844	6058.77	-0.000253091	5940.01	0.01691	5940.01	0.013355
6059.87	-0.000939059	6059.87	-0.000239638	5940.36	0.0174	5940.36	0.0137354
6060.97	-0.000940867	6060.97	-0.000214645	5940.71	0.0177	5940.71	0.0137804
6062.08	-0.000954453	6062.08	-0.00023348	5941.06	0.01802	5941.06	0.0139752
6063.18	-0.000935443	6063.18	-0.000266026	5941.42	0.018	5941.42	0.0140687
6064.28	-0.000978164	6064.28	-0.000243053	5941.77	0.01794	5941.77	0.0141348
6065.39	-0.000967729	6065.39	-0.000242122	5942.12	0.01862	5942.12	0.0143022
6066.49	-0.000971397	6066.49	-0.000247917	5942.48	0.01851	5942.48	0.0140678
6067.59	-0.000958173	6067.59	-0.000232187	5942.83	0.01909	5942.83	0.0144317
6068.7	-0.000929347	6068.7	-0.000221941	5943.18	0.01971	5943.18	0.0148342
6069.8	-0.000939265	6069.8	-0.000266233	5943.54	0.02005	5943.54	0.015361
6070.91	-0.000963545	6070.91	-0.000242432	5943.89	0.02085	5943.89	0.0155632
6072.01	-0.000952439	6072.01	-0.000257541	5944.24	0.02073	5944.24	0.0155959
6073.12	-0.000990096	6073.12	-0.000223494	5944.6	0.02121	5944.6	0.0156386
6074.23	-0.000959774	6074.23	-0.00024238	5944.95	0.02127	5944.95	0.015709
6075.33	-0.000975943	6075.33	-0.000249573	5945.3	0.02191	5945.3	0.0162597
6076.44	-0.00100673	6076.44	-0.000228927	5945.66	0.02178	5945.66	0.016268
6077.55	-0.00101711	6077.55	-0.000249883	5946.01	0.02238	5946.01	0.0165602
6078.66	-0.00103359	6078.66	-0.00021687	5946.36	0.02306	5946.36	0.0172428
6079.77	-0.000976924	6079.77	-0.00022903	5946.72	0.02397	5946.72	0.0178482
6080.88	-0.00105368	6080.88	-0.000247503	5947.07	0.02424	5947.07	0.0177706
6081.99	-0.00097212	6081.99	-0.000228461	5947.42	0.02466	5947.42	0.0176719
6083.09	-0.000998309	6083.09	-0.000242173	5947.78	0.02555	5947.78	0.0183302
6084.21	-0.0010278	6084.21	-0.000260904	5948.13	0.02619	5948.13	0.0189366
6085.32	-0.00100425	6085.32	-0.000260852	5948.49	0.02641	5948.49	0.0188617
6086.43	-0.00102031	6086.43	-0.000228513	5948.84	0.02639	5948.84	0.018892
6087.54	-0.000984104	6087.54	-0.000268665	5949.19	0.02653	5949.19	0.0196526
6088.65	-0.00104536	6088.65	-0.000210143	5949.55	0.02739	5949.55	0.0196245
6089.76	-0.00104929	6089.76	-0.000251125	5949.9	0.02683	5949.9	0.0199463
6090.88	-0.00105817	6090.88	-0.000222511	5950.26	0.02867	5950.26	0.0203969
6091.99	-0.00104123	6091.99	-0.000252574	5950.61	0.02844	5950.61	0.0206154
6093.1	-0.00105368	6093.1	-0.000225874	5950.96	0.02996	5950.96	0.022073
6094.22	-0.00105295	6094.22	-0.000251591	5951.32	0.02938	5951.32	0.021983
6095.33	-0.00107712	6095.33	-0.000219665	5951.67	0.02914	5951.67	0.0218163
6096.45	-0.00106142	6096.45	-0.000253298	5952.03	0.02972	5952.03	0.0227329
6097.56	-0.00106566	6097.56	-0.000224115	5952.38	0.02993	5952.38	0.0232772
6098.68	-0.00104805	6098.68	-0.000227219	5952.74	0.02952	5952.74	0.0224376
6099.79	-0.00106101	6099.79	-0.000189444	5953.09	0.02717	5953.09	0.0220575
6100.91	-0.00108797	6100.91	-0.000200777	5953.44	0.028	5953.44	0.0226837
6102.03	-0.00111002	6102.03	-0.000203882	5953.8	0.02714	5953.8	0.0228285
6103.14	-0.00108069	6103.14	-0.000184166	5954.15	0.02642	5954.15	0.0227298
6104.26	-0.00111147	6104.26	-0.000229444	5954.51	0.02531	5954.51	0.022391
6105.38	-0.00109711	6105.38	-0.000166363	5954.86	0.02467	5954.86	0.0219416
6106.5	-0.0011268	6106.5	-0.000218888	5955.22	0.022	5955.22	0.0207615
6107.62	-0.00111544	6107.62	-0.000168795	5955.57	0.02029	5955.57	0.0202991
6108.74	-0.00115644	6108.74	-0.000233584	5955.93	0.02078	5955.93	0.0208169
6109.86	-0.00118696	6109.86	-0.00018608	5956.28	0.01905	5956.28	0.0198871
6110.98	-0.00113605	6110.98	-0.0002133	5956.64	0.01811	5956.64	0.0193428
6112.1	-0.00122191	6112.1	-0.000241915	5956.99	0.01625	5956.99	0.0182692
6113.22	-0.00117653	6113.22	-0.000204296	5957.35	0.01505	5957.35	0.0169092
6114.34	-0.00121267	6114.34	-0.000243208	5957.7	0.01472	5957.7	0.0181289
6115.46	-0.00114988	6115.46	-0.00023286	5958.06	0.01327	5958.06	0.0166691
6116.58	-0.00118293	6116.58	-0.000250349	5958.41	0.01359	5958.41	0.0177835
6117.7	-0.00110098	6117.7	-0.000247192	5958.77	0.01197	5958.77	0.0153261
6118.83	-0.00113744	6118.83	-0.000227685	5959.12	0.01328	5959.12	0.0163264
6119.95	-0.00114668	6119.95	-0.000217543	5959.48	0.01098	5959.48	0.0147394
6121.08	-0.00112174	6121.08	-0.000219458	5959.83	0.01065	5959.83	0.014993
6122.2	-0.00115102	6122.2	-0.000189961	5960.19	0.00951	5960.19	0.0144683
6123.32	-0.00107248	6123.32	-0.00020885	5960.54	0.01028	5960.54	0.0143531
6124.45	-0.00110775	6124.45	-0.000195913	5960.9	0.00958	5960.9	0.0140492
6125.57	-0.00112164	6125.57	-0.000180439	5961.25	0.01099	5961.25	0.0147466
6126.7	-0.00110656	6126.7	-0.000204244	5961.61	0.01037	5961.61	0.0142061
6127.83	-0.00113708	6127.83	-0.000225098	5961.96	0.00986	5961.96	0.0138924
6128.95	-0.00110713	6128.95	-0.000159687	5962.32	0.00916	5962.32	0.0134082
6130.08	-0.00108678	6130.08	-0.000180905	5962.67	0.0093	5962.67	0.0130326
6131.21	-0.00114353	6131.21	-0.000188668	5963.03	0.0094	5963.03	0.0130915
6132.34	-0.0010968	6132.34	-0.000184786	5963.38	0.0089	5963.38	0.012209
6133.46	-0.00111854	6133.46	-0.000168899	5963.74	0.00908	5963.74	0.012518
6134.59	-0.00114653	6134.59	-0.000167864	5964.1	0.00839	5964.1	0.0119864
6135.72	-0.00107583	6135.72	-0.000142142	5964.45	0.00855	5964.45	0.0119568
6136.85	-0.00114632	6136.85	-0.000158859	5964.81	0.008	5964.81	0.0117811
6137.98	-0.00111379	6137.98	-0.000150889	5965.16	0.00832	5965.16	0.0115952
6139.11	-0.00110124	6139.11	-0.000167864	5965.52	0.00838	5965.52	0.0115303
6140.24	-0.00109742	6140.24	-0.000162275	5965.88	0.00878	5965.88	0.0114474
6141.37	-0.00108916	6141.37	-0.000150837	5966.23	0.00865	5966.23	0.0111923
6142.51	-0.00109241	6142.51	-0.000158911	5966.59	0.00829	5966.59	0.010742
6143.64	-0.0010811	6143.64	-0.000152907	5966.94	0.00813	5966.94	0.0103967
6144.77	-0.00109231	6144.77	-0.000125581	5967.3	0.00816	5967.3	0.0104297
6145.9	-0.00108446	6145.9	-0.000150527	5967.66	0.00803	5967.66	0.0103636
6147.04	-0.00109303	6147.04	-0.000135363	5968.01	0.008	5968.01	0.0101467
6148.17	-0.00111157	6148.17	-0.000113159	5968.37	0.00819	5968.37	0.00985462
6149.31	-0.00109659	6149.31	-0.000105912	5968.72	0.00838	5968.72	0.0100859
6150.44	-0.00111079	6150.44	-0.000134638	5969.08	0.00837	5969.08	0.00994202
6151.57	-0.00109861	6151.57	-0.000114401	5969.44	0.00847	5969.44	0.0099569
6152.71	-0.00112598	6152.71	-0.000102807	5969.79	0.0084	5969.79	0.00997094
6153.85	-0.00109071	6153.85	-0.00011554	5970.15	0.00806	5970.15	0.00960856
6154.98	-0.00105812	6154.98	-0.000122734	5970.51	0.0083	5970.51	0.00968556
6156.12	-0.00112035	6156.12	-9.70615e-05	5970.86	0.00817	5970.86	0.00956778
6157.26	-0.00109659	6157.26	-0.000121233	5971.22	0.00822	5971.22	0.00936394
6158.39	-0.00111162	6158.39	-9.92355e-05	5971.58	0.00827	5971.58	0.00915302
6159.53	-0.00113723	6159.53	-0.000100478	5971.93	0.00819	5971.93	0.00931199
6160.67	-0.00110289	6160.67	-0.000124028	5972.29	0.00822	5972.29	0.00927034
6161.81	-0.00111477	6161.81	-0.000104101	5972.65	0.0082	5972.65	0.00918998
6162.95	-0.00117963	6162.95	-0.000101823	5973	0.00827	5973	0.0086534
6164.09	-0.00114844	6164.09	-0.000118127	5973.36	0.00816	5973.36	0.00903663
6165.23	-0.001133	6165.23	-0.000106378	5973.72	0.00841	5973.72	0.00895264
6166.37	-0.00115004	6166.37	-9.8045e-05	5974.07	0.00827	5974.07	0.00876734
6167.51	-0.00117054	6167.51	-0.000121647	5974.43	0.00823	5974.43	0.0087143
6168.65	-0.00114436	6168.65	-0.000125995	5974.79	0.00807	5974.79	0.00861538
6169.79	-0.0011708	6169.79	-0.000132412	5975.14	0.00824	5975.14	0.00863949
6170.93	-0.00117224	6170.93	-0.000141728	5975.5	0.0081	5975.5	0.00842937
6172.08	-0.00114457	6172.08	-0.00013412	5975.86	0.00818	5975.86	0.00844268
6173.22	-0.00116315	6173.22	-0.000132878	5976.21	0.00848	5976.21	0.00838749
6174.36	-0.00116728	6174.36	-0.000149957	5976.57	0.00834	5976.57	0.00838965
6175.51	-0.0011614	6175.51	-0.000148508	5976.93	0.00843	5976.93	0.00844679
6176.65	-0.00113878	6176.65	-0.000138727	5977.29	0.00841	5977.29	0.00830154
6177.8	-0.00114214	6177.8	-0.000129721	5977.64	0.00852	5977.64	0.00819369
6178.94	-0.00113419	6178.94	-0.000134224	5978	0.00834	5978	0.00812556
6180.09	-0.00109391	6180.09	-0.00013205	5978.36	0.00875	5978.36	0.00829848
6181.23	-0.00110635	6181.23	-0.000150423	5978.72	0.00845	5978.72	0.00797322
6182.38	-0.00113124	6182.38	-0.000156427	5979.07	0.00864	5979.07	0.00805058
6183.53	-0.00110444	6183.53	-0.000138209	5979.43	0.00854	5979.43	0.00791432
6184.67	-0.00113894	6184.67	-0.000129825	5979.79	0.00862	5979.79	0.00794182
6185.82	-0.00111136	6185.82	-0.000149078	5980.15	0.00867	5980.15	0.00786632
6186.97	-0.00110744	6186.97	-0.000142764	5980.5	0.00866	5980.5	0.00776712
6188.12	-0.00111637	6188.12	-0.00013795	5980.86	0.00872	5980.86	0.00771099
6189.27	-0.00112055	6189.27	-0.000119784	5981.22	0.00866	5981.22	0.00769165
6190.42	-0.00109726	6190.42	-0.000132516	5981.58	0.00885	5981.58	0.00774996
6191.57	-0.00108435	6191.57	-0.000135311	5981.93	0.00872	5981.93	0.00763413
6192.72	-0.00109985	6192.72	-0.00013469	5982.29	0.00884	5982.29	0.00767937
6193.87	-0.00109551	6193.87	-0.000139244	5982.65	0.00863	5982.65	0.00746959
6195.02	-0.00109644	6195.02	-0.000131998	5983.01	0.00882	5983.01	0.00753214
6196.17	-0.00110945	6196.17	-0.000128738	5983.37	0.00872	5983.37	0.00743885
6197.32	-0.00111157	6197.32	-0.000143436	5983.72	0.00882	5983.72	0.00737748
6198.47	-0.00111312	6198.47	-0.000132412	5984.08	0.00877	5984.08	0.007379
6199.63	-0.0011014	6199.63	-0.000109794	5984.44	0.00887	5984.44	0.00739593
6200.78	-0.00110888	6200.78	-0.000139451	5984.8	0.00878	5984.8	0.00724124
6201.93	-0.00113863	6201.93	-0.000138675	5985.16	0.00885	5985.16	0.00728557
6203.09	-0.00108534	6203.09	-0.000105033	5985.52	0.00884	5985.52	0.00724337
6204.24	-0.00109618	6204.24	-0.000116368	5985.87	0.00882	5985.87	0.00713442
6205.4	-0.00110641	6205.4	-0.000133396	5986.23	0.00887	5986.23	0.00713613
6206.55	-0.0011047	6206.55	-0.0001188	5986.59	0.00884	5986.59	0.00710584
6207.71	-0.00111338	6207.71	-0.000109432	5986.95	0.00881	5986.95	0.00703441
6208.87	-0.00108198	6208.87	-0.000127806	5987.31	0.00879	5987.31	0.00696583
6210.02	-0.00109959	6210.02	-0.000103635	5987.67	0.00881	5987.67	0.00698745
6211.18	-0.00116357	6211.18	-0.000117248	5988.02	0.00883	5988.02	0.00693823
6212.34	-0.00107268	6212.34	-0.000103376	5988.38	0.00882	5988.38	0.00680077
6213.5	-0.00110496	6213.5	-0.000107155	5988.74	0.00873	5988.74	0.00681933
6214.65	-0.00108027	6214.65	-9.93907e-05	5989.1	0.00873	5989.1	0.00677179
6215.81	-0.00107459	6215.81	-0.000116471	5989.46	0.00868	5989.46	0.00670778
6216.97	-0.00109654	6216.97	-7.30441e-05	5989.82	0.00869	5989.82	0.00665893
6218.13	-0.00108957	6218.13	-9.437e-05	5990.18	0.00865	5990.18	0.00664301
6219.29	-0.00111498	6219.29	-0.000126978	5990.53	0.00853	5990.53	0.00653654
6220.45	-0.00112231	6220.45	-0.000101927	5990.89	0.00855	5990.89	0.00648099
6221.61	-0.00103927	6221.61	-7.58393e-05	5991.25	0.00845	5991.25	0.0064369
6222.78	-0.0012153	6222.78	-0.00011466	5991.61	0.00846	5991.61	0.00639697
6223.94	-0.00106313	6223.94	-0.000134069	5991.97	0.00844	5991.97	0.0063677
6225.1	-0.0011063	6225.1	-0.000100633	5992.33	0.00833	5992.33	0.00629839
6226.26	-0.00116073	6226.26	-0.000122475	5992.69	0.00831	5992.69	0.0061961
6227.43	-0.00109778	6227.43	-0.000155754	5993.05	0.00828	5993.05	0.0062184
6228.59	-0.00108926	6228.59	-0.000129307	5993.41	0.00828	5993.41	0.00622168
6229.75	-0.00110697	6229.75	-0.0001468	5993.77	0.0082	5993.77	0.00618786
6230.92	-0.00112288	6230.92	-0.000160101	5994.13	0.00816	5994.13	0.00610384
6232.08	-0.00108967	6232.08	-0.000140849	5994.49	0.00802	5994.49	0.0059858
6233.25	-0.00111477	6233.25	-0.000142401	5994.84	0.00803	5994.84	0.0060815
6234.41	-0.00111456	6234.41	-0.000166881	5995.2	0.0079	5995.2	0.00595092
6235.58	-0.00109081	6235.58	-0.000136863	5995.56	0.00782	5995.56	0.00586092
6236.75	-0.00106256	6236.75	-0.000153063	5995.92	0.00778	5995.92	0.00586832
6237.91	-0.00107898	6237.91	-0.000179146	5996.28	0.00776	5996.28	0.00582935
6239.08	-0.00104996	6239.08	-0.000165069	5996.64	0.00774	5996.64	0.00591022
6240.25	-0.00106292	6240.25	-0.000126874	5997	0.00755	5997	0.0056695
6241.42	-0.00103746	6241.42	-0.000188202	5997.36	0.00768	5997.36	0.00584426
6242.59	-0.00102295	6242.59	-0.000169831	5997.72	0.00739	5997.72	0.00566213
6243.76	-0.00102073	6243.76	-0.00016419	5998.08	0.00739	5998.08	0.00572642
6244.93	-0.00104495	6244.93	-0.000163465	5998.44	0.00709	5998.44	0.00544454
6246.1	-0.00102584	6246.1	-0.000167295	5998.8	0.00723	5998.8	0.00558097
6247.27	-0.00100683	6247.27	-0.000149388	5999.16	0.00727	5999.16	0.00562099
6248.44	-0.00102228	6248.44	-0.000158807	5999.52	0.00715	5999.52	0.00549555
6249.61	-0.000982709	6249.61	-0.000166674	5999.88	0.00706	5999.88	0.00548224
6250.78	-0.000960291	6250.78	-0.000132516	6000.24	0.00693	6000.24	0.00542273
6251.95	-0.000995261	6251.95	-0.000159273	6000.6	0.00683	6000.6	0.00538261
6253.13	-0.000941487	6253.13	-0.000140797	6000.96	0.00678	6000.96	0.00534442
6254.3	-0.000970674	6254.3	-0.000155909	6001.32	0.00685	6001.32	0.00544234
6255.47	-0.000960704	6255.47	-0.000131688	6001.68	0.0067	6001.68	0.00523825
6256.65	-0.000936011	6256.65	-0.000154667	6002.04	0.00665	6002.04	0.00532705
6257.82	-0.000935443	6257.82	-0.000144109	6002.4	0.00641	6002.4	0.0050002
6259	-0.000963545	6259	-0.000123251	6002.76	0.00651	6002.76	0.00519992
6260.17	-0.000960549	6260.17	-0.000146024	6003.12	0.00644	6003.12	0.00509763
6261.35	-0.000902637	6261.35	-0.000109898	6003.48	0.00645	6003.48	0.00523589
6262.52	-0.000924439	6262.52	-0.000127289	6003.84	0.00638	6003.84	0.00516984
6263.7	-0.000931671	6263.7	-0.000125218	6004.2	0.00626	6004.2	0.00513055
6264.88	-0.000891116	6264.88	-0.000129359	6004.56	0.00614	6004.56	0.00508228
6266.06	-0.000929192	6266.06	-7.30958e-05	6004.92	0.00608	6004.92	0.00494014
6267.23	-0.000920926	6267.23	-0.000102082	6005.28	0.00599	6005.28	0.00492516
6268.41	-0.000920667	6268.41	-7.11288e-05	6005.65	0.00602	6005.65	0.00485723
6269.59	-0.000994487	6269.59	-6.8903e-05	6006.01	0.00605	6006.01	0.00508031
6270.77	-0.000991956	6270.77	-6.18113e-05	6006.37	0.00562	6006.37	0.00464101
6271.95	-0.000989528	6271.95	-7.59428e-05	6006.73	0.00575	6006.73	0.00472121
6273.13	-0.00109711	6273.13	-2.48498e-05	6007.09	0.0056	6007.09	0.004615
6274.31	-0.00109045	6274.31	-6.26436e-06	6007.45	0.0056	6007.45	0.00460603
6275.49	-0.00106044	6275.49	-6.93689e-05	6007.81	0.00546	6007.81	0.00454188
6276.68	-0.00113837	6276.68	-2.09154e-05	6008.17	0.00548	6008.17	0.00464681
6277.86	-0.00121664	6277.86	-5.31665e-05	6008.53	0.00559	6008.53	0.00471328
6279.04	-0.00122841	6279.04	-0.000130808	6008.89	0.00554	6008.89	0.0047238
6280.22	-0.0013061	6280.22	-9.87696e-05	6009.25	0.0055	6009.25	0.00462083
6281.41	-0.00133377	6281.41	-0.00014944	6009.62	0.00531	6009.62	0.00444665
6282.59	-0.00135668	6282.59	-0.000188719	6009.98	0.00521	6009.98	0.00439166
6283.78	-0.00136148	6283.78	-0.000199897	6010.34	0.00517	6010.34	0.00441467
6284.96	-0.00137016	6284.96	-0.000202899	6010.7	0.00511	6010.7	0.00435215
6286.15	-0.00135183	6286.15	-0.000258472	6011.06	0.00506	6011.06	0.00438771
6287.33	-0.00131539	6287.33	-0.000231721	6011.42	0.00506	6011.42	0.00435288
6288.52	-0.00130166	6288.52	-0.000191514	6011.78	0.00498	6011.78	0.00422729
6289.7	-0.00126641	6289.7	-0.000205382	6012.14	0.00495	6012.14	0.00418181
6290.89	-0.00123012	6290.89	-0.000232963	6012.51	0.00489	6012.51	0.004169
6292.08	-0.00120771	6292.08	-0.000182354	6012.87	0.00487	6012.87	0.00419409
6293.27	-0.00120105	6293.27	-0.00020057	6013.23	0.00473	6013.23	0.00415285
6294.45	-0.00118365	6294.45	-0.000183545	6013.59	0.00475	6013.59	0.00413712
6295.64	-0.00116336	6295.64	-0.0001468	6013.95	0.00464	6013.95	0.00402773
6296.83	-0.00116439	6296.83	-0.000132154	6014.31	0.00466	6014.31	0.00405621
6298.02	-0.00110341	6298.02	-0.00014768	6014.68	0.00457	6014.68	0.00390456
6299.21	-0.00112014	6299.21	-0.00014825	6015.04	0.00462	6015.04	0.00394792
6300.4	-0.00111281	6300.4	-0.000129825	6015.4	0.00443	6015.4	0.00392188
6301.59	-0.00104479	6301.59	-0.000134638	6015.76	0.00454	6015.76	0.00396963
6302.79	-0.00105781	6302.79	-0.000114349	6016.12	0.00445	6016.12	0.00389584
6303.98	-0.00112267	6303.98	-0.000154253	6016.49	0.00451	6016.49	0.00393515
6305.17	-0.00107986	6305.17	-0.000159946	6016.85	0.00439	6016.85	0.00381177
6306.36	-0.00109411	6306.36	-0.000137433	6017.21	0.00435	6017.21	0.00383008
6307.56	-0.00110666	6307.56	-0.00013971	6017.57	0.0044	6017.57	0.00383869
6308.75	-0.00107542	6308.75	-0.000157048	6017.93	0.00427	6017.93	0.00380281
6309.94	-0.00108957	6309.94	-0.000132412	6018.3	0.00434	6018.3	0.00380937
6311.14	-0.00109732	6311.14	-0.000135259	6018.66	0.00418	6018.66	0.00372281
6312.33	-0.00104769	6312.33	-0.000171849	6019.02	0.00425	6019.02	0.00371409
6313.53	-0.0010747	6313.53	-0.00012822	6019.38	0.0042	6019.38	0.00364203
6314.73	-0.00104882	6314.73	-0.000161861	6019.74	0.00429	6019.74	0.00369137
6315.92	-0.00103219	6315.92	-0.000149647	6020.11	0.00405	6020.11	0.00356702
6317.12	-0.00103322	6317.12	-0.000139089	6020.47	0.00405	6020.47	0.00356008
6318.32	-0.00103271	6318.32	-0.000148767	6020.83	0.00402	6020.83	0.00356255
6319.51	-0.00103911	6319.51	-0.000159428	6021.19	0.00397	6021.19	0.00355167
6320.71	-0.00103245	6320.71	-0.000103428	6021.56	0.00406	6021.56	0.00352821
6321.91	-0.00100198	6321.91	-0.000111865	6021.92	0.00407	6021.92	0.00364183
6323.11	-0.00101231	6323.11	-0.000138364	6022.28	0.00399	6022.28	0.00353964
6324.31	-0.00102212	6324.31	-9.5871e-05	6022.65	0.00393	6022.65	0.00353025
6325.51	-0.00098865	6325.51	-0.00011497	6023.01	0.004	6023.01	0.00354014
6326.71	-0.000995985	6326.71	-0.00010172	6023.37	0.00384	6023.37	0.00347046
6327.91	-0.000984517	6327.91	-8.74858e-05	6023.73	0.00387	6023.73	0.00348784
6329.11	-0.00100094	6329.11	-8.44836e-05	6024.1	0.00385	6024.1	0.00343787
6330.32	-0.000989373	6330.32	-0.000101979	6024.46	0.00386	6024.46	0.00341439
6331.52	-0.00101597	6331.52	-8.37589e-05	6024.82	0.00392	6024.82	0.00350642
6332.72	-0.00107397	6332.72	-9.85108e-05	6025.19	0.00389	6025.19	0.00341108
6333.92	-0.00102057	6333.92	-0.000139503	6025.55	0.00389	6025.55	0.00348463
6335.13	-0.00104015	6335.13	-9.79415e-05	6025.91	0.00379	6025.91	0.00341186
6336.33	-0.00105957	6336.33	-0.000103066	6026.27	0.0038	6026.27	0.00337116
6337.54	-0.0010654	6337.54	-0.00013588	6026.64	0.00379	6026.64	0.00339665
6338.74	-0.00105363	6338.74	-0.000109794	6027	0.0038	6027	0.00338292
6339.95	-0.00107496	6339.95	-0.000106378	6027.36	0.00379	6027.36	0.00331236
6341.15	-0.00107082	6341.15	-0.000132826	6027.73	0.00375	6027.73	0.00331617
6342.36	-0.00108033	6342.36	-0.000129669	6028.09	0.00376	6028.09	0.00337669
6343.57	-0.00109907	6343.57	-0.00013293	6028.45	0.00373	6028.45	0.00332945
6344.78	-0.00109246	6344.78	-0.000156892	6028.82	0.00376	6028.82	0.00332585
6345.98	-0.00107816	6345.98	-0.00010436	6029.18	0.00373	6029.18	0.00331972
6347.19	-0.00110387	6347.19	-0.00011202	6029.54	0.00378	6029.54	0.0033049
6348.4	-0.00105946	6348.4	-0.000126926	6029.91	0.00373	6029.91	0.00325754
6349.61	-0.00103183	6349.61	-0.000118179	6030.27	0.00373	6030.27	0.00329807
6350.82	-0.00104288	6350.82	-0.000100478	6030.64	0.00364	6030.64	0.00322854
6352.03	-0.00103064	6352.03	-0.000122941	6031	0.00364	6031	0.00322105
6353.24	-0.00103534	6353.24	-8.9815e-05	6031.36	0.00365	6031.36	0.00321904
6354.45	-0.00105032	6354.45	-0.000118231	6031.73	0.00368	6031.73	0.00320141
6355.66	-0.00103736	6355.66	-0.000113314	6032.09	0.00365	6032.09	0.00318214
6356.88	-0.00103441	6356.88	-0.000103273	6032.45	0.0036	6032.45	0.00314446
6358.09	-0.00105409	6358.09	-6.6936e-05	6032.82	0.00357	6032.82	0.00316989
6359.3	-0.00105332	6359.3	-0.00011378	6033.18	0.00359	6033.18	0.00314034
6360.51	-0.00103131	6360.51	-0.000112434	6033.55	0.00358	6033.55	0.0031331
6361.73	-0.00104924	6361.73	-9.46288e-05	6033.91	0.00364	6033.91	0.00318611
6362.94	-0.00104154	6362.94	-0.000126253	6034.27	0.00354	6034.27	0.00306317
6364.16	-0.00101174	6364.16	-0.000111088	6034.64	0.00351	6034.64	0.00302725
6365.37	-0.00106406	6365.37	-0.000113055	6035	0.00353	6035	0.00303476
6366.59	-0.00105042	6366.59	-0.000137743	6035.37	0.00349	6035.37	0.00305895
6367.8	-0.00101556	6367.8	-0.000132205	6035.73	0.00344	6035.73	0.00301896
6369.02	-0.00105058	6369.02	-8.82104e-05	6036.1	0.00345	6036.1	0.00301602
6370.24	-0.00104412	6370.24	-0.000133758	6036.46	0.00347	6036.46	0.00302715
6371.46	-0.00104856	6371.46	-9.8045e-05	6036.82	0.00351	6036.82	0.00301716
6372.67	-0.00106747	6372.67	-0.000107569	6037.19	0.00346	6037.19	0.00297413
6373.89	-0.00106189	6373.89	-0.000117869	6037.55	0.00343	6037.55	0.00299352
6375.11	-0.00105285	6375.11	-0.000116212	6037.92	0.00339	6037.92	0.00294624
6376.33	-0.0010262	6376.33	-7.20088e-05	6038.28	0.0034	6038.28	0.00298552
6377.55	-0.0010765	6377.55	-0.000109846	6038.65	0.00342	6038.65	0.00294963
6378.77	-0.00105373	6378.77	-0.000100944	6039.01	0.0034	6039.01	0.00293769
6379.99	-0.00106463	6379.99	-8.73822e-05	6039.38	0.00338	6039.38	0.00290626
6381.21	-0.00108766	6381.21	-0.000118645	6039.74	0.00334	6039.74	0.00291354
6382.44	-0.00101881	6382.44	-0.000105705	6040.11	0.00338	6040.11	0.00292331
6383.66	-0.0010513	6383.66	-9.71651e-05	6040.47	0.00337	6040.47	0.00292537
6384.88	-0.00108828	6384.88	-0.000120819	6040.84	0.00332	6040.84	0.00290296
6386.1	-0.00103477	6386.1	-8.57259e-05	6041.2	0.00332	6041.2	0.00285709
6387.33	-0.00106494	6387.33	-9.83555e-05	6041.57	0.00337	6041.57	0.00288591
6388.55	-0.00104872	6388.55	-7.68228e-05	6041.93	0.00335	6041.93	0.00285899
6389.78	-0.00104645	6389.78	-9.81485e-05	6042.3	0.0033	6042.3	0.0028209
6391	-0.00106922	6391	-7.90486e-05	6042.66	0.00327	6042.66	0.00285691
6392.23	-0.00109055	6392.23	-7.42864e-05	6043.03	0.00325	6043.03	0.00281566
6393.45	-0.00106194	6393.45	-6.7143e-05	6043.39	0.0033	6043.39	0.00287627
6394.68	-0.0010857	6394.68	-5.87054e-05	6043.76	0.00331	6043.76	0.00277906
6395.91	-0.00110181	6395.91	-8.2879e-05	6044.12	0.00327	6044.12	0.00281384
6397.13	-0.00106504	6397.13	-9.02291e-05	6044.49	0.00328	6044.49	0.00283466
6398.36	-0.00107268	6398.36	-4.56604e-05	6044.85	0.00329	6044.85	0.00279688
6399.59	-0.00110119	6399.59	-8.43283e-05	6045.22	0.00323	6045.22	0.0027373
6400.82	-0.00105977	6400.82	-9.27654e-05	6045.58	0.00321	6045.58	0.00280363
6402.05	-0.00105337	6402.05	-8.1792e-05	6045.95	0.00321	6045.95	0.00281311
6403.28	-0.00106494	6403.28	-0.000104981	6046.31	0.00321	6046.31	0.00278414
6404.51	-0.0010545	6404.51	-0.00010291	6046.68	0.00323	6046.68	0.00279063
6405.74	-0.00108136	6405.74	-7.40276e-05	6047.05	0.00322	6047.05	0.00272722
6406.97	-0.00108833	6406.97	-0.000106534	6047.41	0.00322	6047.41	0.00276033
6408.2	-0.00106354	6408.2	-0.000127444	6047.78	0.00318	6047.78	0.00274931
6409.43	-0.00108043	6409.43	-7.57875e-05	6048.14	0.00319	6048.14	0.00277161
6410.67	-0.00108528	6410.67	-8.35001e-05	6048.51	0.00325	6048.51	0.00272922
6411.9	-0.00105626	6411.9	-0.000101409	6048.88	0.00313	6048.88	0.00273438
6413.13	-0.00109076	6413.13	-8.17402e-05	6049.24	0.00319	6049.24	0.0027608
6414.37	-0.00112722	6414.37	-0.000106741	6049.61	0.00316	6049.61	0.00272415
6415.6	-0.00108921	6415.6	-9.38524e-05	6049.97	0.00315	6049.97	0.00272058
6416.84	-0.0010796	6416.84	-7.23194e-05	6050.34	0.00315	6050.34	0.00271841
6418.07	-0.00109386	6418.07	-0.000108863	6050.71	0.00315	6050.71	0.00272289
6419.31	-0.00108404	6419.31	-0.000106896	6051.07	0.00313	6051.07	0.00273162
6420.55	-0.00108916	6420.55	-8.43801e-05	6051.44	0.00313	6051.44	0.00269945
6421.78	-0.00109871	6421.78	-0.000104567	6051.8	0.00312	6051.8	0.00271107
6423.02	-0.00105951	6423.02	-0.000107155	6052.17	0.00311	6052.17	0.00266911
6424.26	-0.00106111	6424.26	-5.37359e-05	6052.54	0.00312	6052.54	0.00272396
6425.5	-0.00109422	6425.5	-0.000117196	6052.9	0.00313	6052.9	0.00272649
6426.74	-0.00105858	6426.74	-0.000116057	6053.27	0.00307	6053.27	0.00264908
6427.97	-0.00106483	6427.97	-7.74957e-05	6053.64	0.00308	6053.64	0.00265765
6429.21	-0.00109303	6429.21	-0.000103376	6054	0.00315	6054	0.00269
6430.45	-0.00106127	6430.45	-0.000123821	6054.37	0.00306	6054.37	0.00263887
6431.7	-0.00110656	6431.7	-7.57357e-05	6054.73	0.00306	6054.73	0.00262423
6432.94	-0.00109835	6432.94	-0.000110778	6055.1	0.00301	6055.1	0.00259103
6434.18	-0.00107335	6434.18	-0.000124338	6055.47	0.00306	6055.47	0.00264799
6435.42	-0.00109881	6435.42	-0.000103221	6055.83	0.00306	6055.83	0.00266767
6436.66	-0.00108637	6436.66	-0.000128686	6056.2	0.00306	6056.2	0.00261749
6437.91	-0.00104133	6437.91	-0.000118231	6056.57	0.00304	6056.57	0.00266827
6439.15	-0.00106628	6439.15	-9.10573e-05	6056.94	0.003	6056.94	0.00253489
6440.39	-0.00106659	6440.39	-0.000129307	6057.3	0.00303	6057.3	0.00263957
6441.64	-0.00103911	6441.64	-0.000112279	6057.67	0.00303	6057.67	0.00261126
6442.88	-0.00107113	6442.88	-9.16267e-05	6058.04	0.00297	6058.04	0.00256366
6444.13	-0.00108621	6444.13	-0.00012056	6058.4	0.00301	6058.4	0.00264395
6445.38	-0.00107511	6445.38	-0.000126771	6058.77	0.00299	6058.77	0.00260988
6446.62	-0.00111456	6446.62	-7.85309e-05	6059.14	0.00296	6059.14	0.00256119
6447.87	-0.00110165	6447.87	-0.000101151	6059.5	0.00299	6059.5	0.0025904
6449.12	-0.0010623	6449.12	-0.000129204	6059.87	0.00299	6059.87	0.00256244
6450.36	-0.00107971	6450.36	-9.28689e-05	6060.24	0.00297	6060.24	0.0025477
6451.61	-0.00108182	6451.61	-0.000149026	6060.61	0.00295	6060.61	0.00258837
6452.86	-0.00104309	6452.86	-0.000111399	6060.97	0.00296	6060.97	0.00256905
6454.11	-0.00108435	6454.11	-0.000103635	6061.34	0.00293	6061.34	0.00254387
6455.36	-0.00109535	6455.36	-0.000135104	6061.71	0.00291	6061.71	0.00253874
6456.61	-0.0010498	6456.61	-0.000128324	6062.08	0.00296	6062.08	0.00253984
6457.86	-0.00105394	6457.86	-9.47323e-05	6062.44	0.00291	6062.44	0.00253606
6459.11	-0.00108244	6459.11	-0.00014944	6062.81	0.00288	6062.81	0.00250943
6460.37	-0.00106457	6460.37	-0.000103635	6063.18	0.00295	6063.18	0.00257804
6461.62	-0.00109566	6461.62	-7.40793e-05	6063.55	0.00292	6063.55	0.00254877
6462.87	-0.00105053	6462.87	-0.000113625	6063.91	0.0029	6063.91	0.00253479
6464.12	-0.00102419	6464.12	-0.000107413	6064.28	0.00289	6064.28	0.00248808
6465.38	-0.00108451	6465.38	-8.04979e-05	6064.65	0.00289	6064.65	0.00249253
6466.63	-0.00106891	6466.63	-0.000109846	6065.02	0.00287	6065.02	0.0024887
6467.89	-0.00106793	6467.89	-9.47841e-05	6065.39	0.00291	6065.39	0.00248927
6469.14	-0.00105724	6469.14	-9.11091e-05	6065.75	0.00284	6065.75	0.00246441
6470.4	-0.00104862	6470.4	-0.000124028	6066.12	0.00292	6066.12	0.00250966
6471.65	-0.00104789	6471.65	-9.73721e-05	6066.49	0.00285	6066.49	0.0024528
6472.91	-0.00107594	6472.91	-8.26719e-05	6066.86	0.00286	6066.86	0.00246863
6474.17	-0.00106148	6474.17	-0.000138571	6067.23	0.00283	6067.23	0.00246923
6475.43	-0.00103612	6475.43	-7.36135e-05	6067.59	0.00285	6067.59	0.00246077
6476.68	-0.00107341	6476.68	-7.77027e-05	6067.96	0.00288	6067.96	0.0024489
6477.94	-0.00101448	6477.94	-0.000106689	6068.33	0.00283	6068.33	0.00247855
6479.2	-0.00103224	6479.2	-8.76928e-05	6068.7	0.00283	6068.7	0.00254398
6480.46	-0.00108497	6480.46	-5.95336e-05	6069.07	0.00285	6069.07	0.00242068
6481.72	-0.00104572	6481.72	-0.000117972	6069.43	0.00281	6069.43	0.00240745
6482.98	-0.00106891	6482.98	-6.78677e-05	6069.8	0.00282	6069.8	0.00246858
6484.24	-0.00108167	6484.24	-9.00738e-05	6070.17	0.0028	6070.17	0.00241253
6485.5	-0.0010465	6485.5	-0.000105084	6070.54	0.0028	6070.54	0.0023966
6486.77	-0.00106334	6486.77	-7.15947e-05	6070.91	0.00279	6070.91	0.00245725
6488.03	-0.00107733	6488.03	-8.25166e-05	6071.28	0.0028	6071.28	0.0024275
6489.29	-0.00105543	6489.29	-0.000102238	6071.65	0.00276	6071.65	0.00240358
6490.56	-0.00104366	6490.56	-7.53734e-05	6072.01	0.00277	6072.01	0.0024199
6491.82	-0.0010561	6491.82	-9.33865e-05	6072.38	0.0028	6072.38	0.00240829
6493.08	-0.00103214	6493.08	-0.000103376	6072.75	0.00276	6072.75	0.00241024
6494.35	-0.00105734	6494.35	-7.01453e-05	6073.12	0.00278	6073.12	0.00239306
6495.62	-0.00111224	6495.62	-9.05914e-05	6073.49	0.00277	6073.49	0.00240069
6496.88	-0.00106953	6496.88	-0.00010907	6073.86	0.00277	6073.86	0.00242903
6498.15	-0.00108596	6498.15	-6.31572e-05	6074.23	0.00273	6074.23	0.00236016
6499.42	-0.0010998	6499.42	-8.86245e-05	6074.6	0.00269	6074.6	0.0023161
6500.68	-0.00105197	6500.68	-0.000108086	6074.97	0.00273	6074.97	0.00232581
6501.95	-0.00108554	6501.95	-8.6347e-05	6075.33	0.00276	6075.33	0.002375
6503.22	-0.0010938	6503.22	-0.000123355	6075.7	0.0027	6075.7	0.00235503
6504.49	-0.00103147	6504.49	-0.00011554	6076.07	0.00269	6076.07	0.00229861
6505.76	-0.00105657	6505.76	-8.86245e-05	6076.44	0.00276	6076.44	0.0023617
6507.03	-0.00106049	6507.03	-0.000129618	6076.81	0.00268	6076.81	0.00231977
6508.3	-0.00103669	6508.3	-0.00011378	6077.18	0.00266	6077.18	0.00224782
6509.57	-0.00108745	6509.57	-8.9815e-05	6077.55	0.00272	6077.55	0.0023148
6510.84	-0.00108002	6510.84	-0.000125891	6077.92	0.00273	6077.92	0.00238249
6512.11	-0.00103911	6512.11	-0.000112538	6078.29	0.00266	6078.29	0.00232271
6513.38	-0.00107888	6513.38	-8.68646e-05	6078.66	0.00262	6078.66	0.00224358
6514.66	-0.00104758	6514.66	-0.000125995	6079.03	0.00266	6079.03	0.00229369
6515.93	-0.001048	6515.93	-0.000115126	6079.4	0.00269	6079.4	0.00229918
6517.21	-0.00108678	6517.21	-0.0001129	6079.77	0.00268	6079.77	0.00227329
6518.48	-0.00104319	6518.48	-0.000147732	6080.14	0.00262	6080.14	0.00222104
6519.75	-0.0010277	6519.75	-8.58812e-05	6080.51	0.00256	6080.51	0.00219133
6521.03	-0.00105171	6521.03	-0.000120664	6080.88	0.00264	6080.88	0.00225875
6522.31	-0.00102119	6522.31	-0.000115384	6081.25	0.00263	6081.25	0.00222156
6523.58	-0.00104676	6523.58	-0.000136812	6081.62	0.00259	6081.62	0.00221048
6524.86	-0.00107206	6524.86	-8.03944e-05	6081.99	0.00258	6081.99	0.00218891
6526.14	-0.00105342	6526.14	-0.000146179	6082.36	0.00257	6082.36	0.00215634
6527.42	-0.00104805	6527.42	-9.72168e-05	6082.73	0.00263	6082.73	0.00223233
6528.69	-0.0010686	6528.69	-0.000123821	6083.09	0.00256	6083.09	0.00217382
6529.97	-0.00101277	6529.97	-0.000134948	6083.46	0.00254	6083.46	0.00216654
6531.25	-0.00104898	6531.25	-0.000112124	6083.84	0.00251	6083.84	0.00215631
6532.53	-0.00107299	6532.53	-0.000122941	6084.21	0.00251	6084.21	0.00213724
6533.81	-0.00100812	6533.81	-0.000128013	6084.58	0.00252	6084.58	0.002111
6535.09	-0.00104087	6535.09	-9.30242e-05	6084.95	0.0025	6084.95	0.00211724
6536.37	-0.00105507	6536.37	-0.000141159	6085.32	0.00252	6085.32	0.00210265
6537.66	-0.00104288	6537.66	-0.000128945	6085.69	0.0025	6085.69	0.00212788
6538.94	-0.00108089	6538.94	-9.43182e-05	6086.06	0.00246	6086.06	0.00210715
6540.22	-0.00105063	6540.22	-0.00013588	6086.43	0.00249	6086.43	0.00210923
6541.51	-0.00101623	6541.51	-0.000130808	6086.8	0.00249	6086.8	0.00208616
6542.79	-0.0010387	6542.79	-9.89249e-05	6087.17	0.00251	6087.17	0.00210369
6544.07	-0.00104046	6544.07	-0.000136035	6087.54	0.00243	6087.54	0.00206038
6545.36	-0.000998567	6545.36	-0.000109536	6087.91	0.00243	6087.91	0.00209019
6546.64	-0.00105652	6546.64	-9.2196e-05	6088.28	0.00241	6088.28	0.00205143
6547.93	-0.000998361	6547.93	-0.00013117	6088.65	0.00242	6088.65	0.00204618
6549.22	-0.000999187	6549.22	-8.8521e-05	6089.02	0.00239	6089.02	0.0020143
6550.5	-0.00104841	6550.5	-0.000103117	6089.39	0.0024	6089.39	0.00198917
6551.79	-0.00104221	6551.79	-0.000113832	6089.76	0.00236	6089.76	0.00198109
6553.08	-0.00104536	6553.08	-0.000100581	6090.13	0.00241	6090.13	0.00202735
6554.37	-0.00105192	6554.37	-9.48358e-05	6090.5	0.00239	6090.5	0.00199898
6555.66	-0.000998257	6555.66	-0.000105447	6090.88	0.00233	6090.88	0.00195329
6556.95	-0.0010137	6556.95	-9.41112e-05	6091.25	0.00238	6091.25	0.00196985
6558.24	-0.00104547	6558.24	-0.000119111	6091.62	0.00236	6091.62	0.0019672
6559.53	-0.0009949	6559.53	-0.000119628	6091.99	0.00235	6091.99	0.00195935
6560.82	-0.00101448	6560.82	-6.95241e-05	6092.36	0.00231	6092.36	0.00191717
6562.11	-0.00105647	6562.11	-0.000134379	6092.73	0.00231	6092.73	0.00191111
6563.4	-0.00100678	6563.4	-0.000111865	6093.1	0.0023	6093.1	0.00193959
6564.69	-0.00103746	6564.69	-7.65639e-05	6093.47	0.0023	6093.47	0.00191322
6565.99	-0.00106168	6565.99	-0.000126564	6093.85	0.00226	6093.85	0.00186658
6567.28	-0.00103787	6567.28	-0.000102393	6094.22	0.00226	6094.22	0.00184175
6568.58	-0.00106638	6568.58	-8.46389e-05	6094.59	0.00225	6094.59	0.00183037
6569.87	-0.00103106	6569.87	-0.000116782	6094.96	0.00223	6094.96	0.00183484
6571.17	-0.0010091	6571.17	-0.000112124	6095.33	0.00226	6095.33	0.00186338
6572.46	-0.00106049	6572.46	-8.75893e-05	6095.7	0.00222	6095.7	0.00182239
6573.76	-0.00102806	6573.76	-0.000124752	6096.07	0.0022	6096.07	0.00178207
6575.05	-0.00102222	6575.05	-9.8045e-05	6096.45	0.0022	6096.45	0.00178106
6576.35	-0.00104815	6576.35	-0.000123666	6096.82	0.00223	6096.82	0.00179712
6577.65	-0.00101649	6577.65	-0.000130653	6097.19	0.00224	6097.19	0.00178745
6578.95	-0.00105022	6578.95	-9.52499e-05	6097.56	0.00219	6097.56	0.00177027
6580.25	-0.00108151	6580.25	-9.98048e-05	6097.93	0.00222	6097.93	0.00177113
6581.55	-0.00100616	6581.55	-0.000139503	6098.3	0.00223	6098.3	0.0017691
6582.85	-0.0010417	6582.85	-8.55706e-05	6098.68	0.00219	6098.68	0.00170953
6584.15	-0.00103684	6584.15	-0.000115074	6099.05	0.00215	6099.05	0.00169838
6585.45	-0.00100972	6585.45	-0.000121078	6099.42	0.00214	6099.42	0.00165714
6586.75	-0.00104056	6586.75	-8.57259e-05	6099.79	0.00219	6099.79	0.00171761
6588.05	-0.00106685	6588.05	-9.79932e-05	6100.16	0.00216	6100.16	0.00167211
6589.35	-0.00102088	6589.35	-0.000104722	6100.54	0.00214	6100.54	0.00167024
6590.65	-0.00103751	6590.65	-6.41407e-05	6100.91	0.00214	6100.91	0.00165584
6591.96	-0.00103483	6591.96	-0.000118127	6101.28	0.00215	6101.28	0.00166086
6593.26	-0.00102667	6593.26	-9.47841e-05	6101.65	0.00219	6101.65	0.00168126
6594.57	-0.00105357	6594.57	-8.04461e-05	6102.03	0.00215	6102.03	0.00162503
6595.87	-0.00105084	6595.87	-0.000131429	6102.4	0.0021	6102.4	0.00161731
6597.18	-0.000996759	6597.18	-8.57259e-05	6102.77	0.00208	6102.77	0.0015939
6598.48	-0.00103565	6598.48	-9.33348e-05	6103.14	0.00211	6103.14	0.00161632
6599.79	-0.00100693	6599.79	-0.000113055	6103.52	0.00208	6103.52	0.00156594
6601.1	-0.0010215	6601.1	-8.26202e-05	6103.89	0.00211	6103.89	0.00157899
6602.4	-0.00105858	6602.4	-0.000110726	6104.26	0.00208	6104.26	0.00153293
6603.71	-0.00103033	6603.71	-0.000130756	6104.63	0.00208	6104.63	0.00153048
6605.02	-0.00105518	6605.02	-7.13359e-05	6105.01	0.00209	6105.01	0.00155316
6606.33	-0.00104846	6606.33	-0.000103842	6105.38	0.00209	6105.38	0.00156457
6607.64	-0.00101484	6607.64	-9.89767e-05	6105.75	0.00203	6105.75	0.00152848
6608.95	-0.00106912	6608.95	-6.13972e-05	6106.12	0.00204	6106.12	0.00151536
6610.26	-0.0010262	6610.26	-0.000114918	6106.5	0.00201	6106.5	0.0015056
6611.57	-0.00101463	6611.57	-7.99285e-05	6106.87	0.00202	6106.87	0.00150599
6612.88	-0.00103658	6612.88	-6.02584e-05	6107.24	0.00204	6107.24	0.00154526
6614.19	-0.000998877	6614.19	-0.000103583	6107.62	0.00202	6107.62	0.00147056
6615.51	-0.00101577	6615.51	-9.46806e-05	6107.99	0.00199	6107.99	0.00144747
6616.82	-0.00107904	6616.82	-6.50207e-05	6108.36	0.00195	6108.36	0.00143788
6618.13	-0.00102997	6618.13	-0.000104826	6108.74	0.002	6108.74	0.0014671
6619.45	-0.00103142	6619.45	-6.70912e-05	6109.11	0.002	6109.11	0.00147199
6620.76	-0.00104206	6620.76	-9.78897e-05	6109.48	0.00197	6109.48	0.00145975
6622.08	-0.00101107	6622.08	-0.000105188	6109.86	0.00194	6109.86	0.0014203
6623.39	-0.00103452	6623.39	-7.85309e-05	6110.23	0.0019	6110.23	0.00140114
6624.71	-0.00104774	6624.71	-0.000104308	6110.6	0.00189	6110.6	0.00139623
6626.03	-0.0010028	6626.03	-0.000103066	6110.98	0.00189	6110.98	0.00138774
6627.34	-0.00100461	6627.34	-8.05497e-05	6111.35	0.00188	6111.35	0.00136717
6628.66	-0.00100688	6628.66	-0.000108759	6111.72	0.00187	6111.72	0.00135387
6629.98	-0.00100838	6629.98	-0.0001026	6112.1	0.00188	6112.1	0.00139482
6631.3	-0.00105982	6631.3	-7.03006e-05	6112.47	0.00188	6112.47	0.00135468
6632.62	-0.00104738	6632.62	-0.000139762	6112.84	0.00182	6112.84	0.00129854
6633.94	-0.00100864	6633.94	-9.45253e-05	6113.22	0.00182	6113.22	0.00130018
6635.26	-0.00105409	6635.26	-8.07567e-05	6113.59	0.00183	6113.59	0.0013249
6636.58	-0.00100559	6636.58	-0.000113573	6113.96	0.00185	6113.96	0.00132256
6637.9	-0.00101427	6637.9	-8.82622e-05	6114.34	0.00179	6114.34	0.00126466
6639.22	-0.00105884	6639.22	-8.54671e-05	6114.71	0.00179	6114.71	0.00127668
6640.55	-0.0010042	6640.55	-0.00010172	6115.09	0.00179	6115.09	0.00127575
6641.87	-0.00100755	6641.87	-6.5383e-05	6115.46	0.00179	6115.46	0.00126243
6643.19	-0.00104903	6643.19	-7.90486e-05	6115.83	0.00175	6115.83	0.00123699
6644.52	-0.00101226	6644.52	-0.000100271	6116.21	0.00175	6116.21	0.00122507
6645.84	-0.00107439	6645.84	-7.29405e-05	6116.58	0.00176	6116.58	0.00123784
6647.17	-0.00107165	6647.17	-8.81587e-05	6116.96	0.00178	6116.96	0.00123551
6648.49	-0.00101164	6648.49	-8.82622e-05	6117.33	0.00174	6117.33	0.00119792
6649.82	-0.00106215	6649.82	-9.14714e-05	6117.7	0.00172	6117.7	0.00119888
6651.15	-0.00102388	6651.15	-0.000136242	6118.08	0.00175	6118.08	0.00118061
6652.47	-0.00102646	6652.47	-5.52371e-05	6118.45	0.00176	6118.45	0.00118162
6653.8	-0.00106365	6653.8	-3.87237e-05	6118.83	0.00171	6118.83	0.00116854
6655.13	-0.00100637	6655.13	-0.000117817	6119.2	0.00167	6119.2	0.0011688
6656.46	-0.00101959	6656.46	-5.60136e-05	6119.58	0.0017	6119.58	0.0011438
6657.79	-0.00102723	6657.79	-6.65218e-05	6119.95	0.00169	6119.95	0.00113293
6659.12	-0.00100218	6659.12	-0.000107724	6120.33	0.0017	6120.33	0.00114707
6660.45	-0.00107041	6660.45	-7.43899e-05	6120.7	0.00171	6120.7	0.00113033
6661.78	-0.00103901	6661.78	-8.91939e-05	6121.08	0.00171	6121.08	0.00111634
6663.11	-0.000980282	6663.11	-7.34582e-05	6121.45	0.00168	6121.45	0.00112984
6664.45	-0.0010261	6664.45	-6.88512e-05	6121.82	0.00166	6121.82	0.00110376
6665.78	-0.00100797	6665.78	-0.000100529	6122.2	0.00164	6122.2	0.00107264
6667.11	-0.000993402	6667.11	-6.47619e-05	6122.57	0.00163	6122.57	0.00106838
6668.45	-0.00105125	6668.45	-4.49357e-05	6122.95	0.00164	6122.95	0.00107339
6669.78	-0.000978887	6669.78	-8.59329e-05	6123.32	0.00162	6123.32	0.00102414
6671.11	-0.000977544	6671.11	-5.44089e-05	6123.7	0.00161	6123.7	0.00101376
6672.45	-0.0010559	6672.45	-6.49172e-05	6124.07	0.00163	6124.07	0.00103304
6673.79	-0.000987255	6673.79	-9.12126e-05	6124.45	0.00161	6124.45	0.00103099
6675.12	-0.00105745	6675.12	-3.13209e-05	6124.82	0.00157	6124.82	0.000983018
6676.46	-0.00104397	6676.46	-8.21025e-05	6125.2	0.00158	6125.2	0.000964598
6677.8	-0.000985189	6677.8	-8.27754e-05	6125.57	0.00158	6125.57	0.00097552
6679.13	-0.00101809	6679.13	-5.02676e-05	6125.95	0.00159	6125.95	0.000973445
6680.47	-0.00100007	6680.47	-8.95045e-05	6126.32	0.00156	6126.32	0.000947709
6681.81	-0.000989321	6681.81	-8.22061e-05	6126.7	0.00154	6126.7	0.000936294
6683.15	-0.00102233	6683.15	-4.11567e-05	6127.08	0.00152	6127.08	0.000931729
6684.49	-0.000991387	6684.49	-7.7651e-05	6127.45	0.00153	6127.45	0.000923116
6685.83	-0.000990974	6685.83	-3.0182e-05	6127.83	0.00149	6127.83	0.000879615
6687.17	-0.00102336	6687.17	-6.37783e-05	6128.2	0.0015	6128.2	0.000890094
6688.52	-0.00100518	6688.52	-0.000122786	6128.58	0.00153	6128.58	0.00090558
6689.86	-0.00104598	6689.86	-3.29775e-05	6128.95	0.00154	6128.95	0.000901119
6691.2	-0.00104376	6691.2	-6.3623e-05	6129.33	0.00148	6129.33	0.000873183
6692.54	-0.00100373	6692.54	-7.00418e-05	6129.7	0.00151	6129.7	0.000894193
6693.89	-0.00102532	6693.89	-8.96597e-05	6130.08	0.00153	6130.08	0.000860317
6695.23	-0.00100941	6695.23	-8.62952e-05	6130.46	0.00151	6130.46	0.00086924
6696.58	-0.00101303	6696.58	-7.59428e-05	6130.83	0.00149	6130.83	0.00087492
6697.92	-0.00106638	6697.92	-5.95336e-05	6131.21	0.00148	6131.21	0.000844885
6699.27	-0.00102326	6699.27	-0.000112331	6131.58	0.00147	6131.58	0.000861044
6700.62	-0.00100167	6700.62	-5.4616e-05	6131.96	0.0015	6131.96	0.000846104
6701.96	-0.00104417	6701.96	-6.44513e-05	6132.34	0.0015	6132.34	0.000836067
6703.31	-0.00102708	6703.31	-9.41112e-05	6132.71	0.0015	6132.71	0.000816615
6704.66	-0.00101303	6704.66	-5.01123e-05	6133.09	0.00148	6133.09	0.000835133
6706.01	-0.0010702	6706.01	-6.93689e-05	6133.46	0.00148	6133.46	0.000825978
6707.36	-0.000986222	6707.36	-5.22865e-05	6133.84	0.00147	6133.84	0.000832228
6708.71	-0.00101809	6708.71	-2.53675e-05	6134.22	0.00148	6134.22	0.000824059
6710.06	-0.00104536	6710.06	-6.93689e-05	6134.59	0.00148	6134.59	0.000822528
6711.41	-0.000999755	6711.41	-6.18631e-05	6134.97	0.00147	6134.97	0.000805075
6712.76	-0.00106581	6712.76	-4.76793e-05	6135.35	0.00148	6135.35	0.000794883
6714.11	-0.00100249	6714.11	-9.80967e-05	6135.72	0.00147	6135.72	0.00079675
6715.47	-0.000997534	6715.47	-4.02767e-05	6136.1	0.00148	6136.1	0.000791511
6716.82	-0.00103379	6716.82	-6.85406e-05	6136.48	0.00146	6136.48	0.000767835
6718.17	-0.000978629	6718.17	-7.51146e-05	6136.85	0.00148	6136.85	0.00079426
6719.53	-0.00107377	6719.53	-4.3331e-05	6137.23	0.00144	6137.23	0.000764049
6720.88	-0.00106674	6720.88	-6.85406e-05	6137.6	0.00146	6137.6	0.000757851
6722.24	-0.000989889	6722.24	-6.49689e-05	6137.98	0.00146	6137.98	0.000760548
6723.59	-0.00107883	6723.59	-3.89307e-05	6138.36	0.00146	6138.36	0.000744575
6724.95	-0.00103999	6724.95	-8.95045e-05	6138.74	0.00143	6138.74	0.000735629
6726.31	-0.0010684	6726.31	-5.48748e-05	6139.11	0.00144	6139.11	0.000736536
6727.66	-0.00110119	6727.66	-7.02488e-05	6139.49	0.00145	6139.49	0.000743486
6729.02	-0.00102222	6729.02	-7.64087e-05	6139.87	0.00143	6139.87	0.00070314
6730.38	-0.00106556	6730.38	-4.86111e-05	6140.24	0.00141	6140.24	0.000709078
6731.74	-0.0010685	6731.74	-7.80651e-05	6140.62	0.00144	6140.62	0.000716493
6733.1	-0.00102636	6733.1	-0.000112589	6141	0.00146	6141	0.000715689
6734.46	-0.00110062	6734.46	-4.5764e-05	6141.37	0.00141	6141.37	0.000718723
6735.82	-0.00104366	6735.82	-9.90284e-05	6141.75	0.00141	6141.75	0.000706977
6737.18	-0.00103901	6737.18	-4.83523e-05	6142.13	0.00143	6142.13	0.000700314
6738.54	-0.00105786	6738.54	-5.45642e-05	6142.51	0.0014	6142.51	0.000701636
6739.91	-0.00099929	6739.91	-8.32413e-05	6142.88	0.00142	6142.88	0.00068971
6741.27	-0.00105585	6741.27	-4.90253e-05	6143.26	0.00145	6143.26	0.000689787
6742.63	-0.00106876	6742.63	-4.96464e-05	6143.64	0.00142	6143.64	0.000702544
6744	-0.00103591	6744	-0.000101616	6144.02	0.00142	6144.02	0.000660128
6745.36	-0.00106473	6745.36	-2.79042e-05	6144.39	0.0014	6144.39	0.000648591
6746.73	-0.00107728	6746.73	-9.19372e-05	6144.77	0.00135	6144.77	0.000603459
6748.09	-0.00100249	6748.09	-1.61525e-05	6145.15	0.00131	6145.15	0.00056564
6749.46	-0.00114415	6749.46	-0.000112796	6145.53	0.00154	6145.53	0.00078355
6750.83	-0.00101014	6750.83	-7.57357e-05	6145.9	0.00133	6145.9	0.000575697
6752.19	-0.00102305	6752.19	-5.71007e-05	6146.28	0.00141	6146.28	0.000656031
6753.56	-0.001048	6753.56	-4.85594e-05	6146.66	0.00147	6146.66	0.000702051
6754.93	-0.00101572	6754.93	-0.000114608	6147.04	0.00138	6147.04	0.000610121
6756.3	-0.00103514	6756.3	-5.19241e-05	6147.42	0.00144	6147.42	0.000649602
6757.67	-0.00104593	6757.67	-8.26202e-05	6147.79	0.00142	6147.79	0.000643484
6759.04	-0.000897677	6759.04	-5.7463e-05	6148.17	0.00141	6148.17	0.000620645
6760.41	-0.00118329	6760.41	-7.83239e-05	6148.55	0.0014	6148.55	0.000655772
6761.78	-0.000949597	6761.78	-9.47323e-05	6148.93	0.00141	6148.93	0.000635499
6763.15	-0.0010622	6763.15	-4.21921e-05	6149.31	0.00141	6149.31	0.00062093
6764.53	-0.00109138	6764.53	-7.75474e-05	6149.68	0.00142	6149.68	0.000642058
6765.9	-0.00103157	6765.9	-0.000135155	6150.06	0.0014	6150.06	0.000585599
6767.27	-0.00103426	6767.27	-4.36416e-05	6150.44	0.0014	6150.44	0.000607865
6768.65	-0.00105574	6768.65	-0.000100064	6150.82	0.0014	6150.82	0.000620153
6770.02	-0.000983329	6770.02	-7.89968e-05	6151.2	0.0014	6151.2	0.000587906
6771.4	-0.00112835	6771.4	-3.84131e-05	6151.57	0.0014	6151.57	0.000587258
6772.77	-0.00103818	6772.77	-9.07985e-05	6151.95	0.00139	6151.95	0.000592157
6774.15	-0.00102858	6774.15	-4.43145e-05	6152.33	0.00139	6152.33	0.000595812
6775.53	-0.00106788	6775.53	-4.86629e-05	6152.71	0.0014	6152.71	0.000577045
6776.9	-0.000992111	6776.9	-0.000117662	6153.09	0.00139	6153.09	0.00054335
6778.28	-0.00105982	6778.28	-5.19241e-05	6153.47	0.00138	6153.47	0.000557579
6779.66	-0.000985602	6779.66	-6.21736e-05	6153.85	0.00137	6153.85	0.000566236
6781.04	-0.00104975	6781.04	-9.31795e-05	6154.22	0.00138	6154.22	0.000578082
6782.42	-0.00102749	6782.42	-6.26395e-05	6154.6	0.00139	6154.6	0.000567765
6783.8	-0.00101427	6783.8	-0.000109277	6154.98	0.00138	6154.98	0.000559316
6785.18	-0.00104071	6785.18	-7.31476e-05	6155.36	0.00141	6155.36	0.000569735
6786.56	-0.00101597	6786.56	-7.86345e-05	6155.74	0.0014	6155.74	0.000565148
6787.94	-0.000993763	6787.94	-5.68936e-05	6156.12	0.0014	6156.12	0.000545242
6789.33	-0.00110857	6789.33	-0.000172056	6156.5	0.00136	6156.5	0.000523082
6790.71	-0.000958999	6790.71	4.11589e-06	6156.88	0.00138	6156.88	0.000535445
6792.09	-0.00106452	6792.09	-0.000137485	6157.26	0.00138	6157.26	0.000545942
6793.48	-0.00100802	6793.48	-5.50301e-05	6157.64	0.00135	6157.64	0.000530157
6794.86	-0.0009949	6794.86	-0.000106999	6158.01	0.00135	6158.01	0.000540887
6796.25	-0.00101411	6796.25	-5.93266e-05	6158.39	0.00136	6158.39	0.000526322
6797.63	-0.00101355	6797.63	-9.8045e-05	6158.77	0.00136	6158.77	0.000532127
6799.02	-0.000993454	6799.02	-0.000139141	6159.15	0.00138	6159.15	0.000535082
6800.41	-0.000997741	6800.41	-5.74113e-05	6159.53	0.00138	6159.53	0.000557398
6801.8	-0.000992007	6801.8	-7.83239e-05	6159.91	0.00138	6159.91	0.000525492
6803.18	-0.00096401	6803.18	-8.55188e-05	6160.29	0.0014	6160.29	0.000525078
6804.57	-0.00103472	6804.57	-0.000112434	6160.67	0.00136	6160.67	0.000537829
6805.96	-0.000986945	6805.96	-9.94943e-05	6161.05	0.00137	6161.05	0.000527384
6807.35	-0.000928778	6807.35	-6.10866e-05	6161.43	0.00138	6161.43	0.000523134
6808.74	-0.000990561	6808.74	-7.69263e-05	6161.81	0.0014	6161.81	0.000539047
6810.13	-0.00102837	6810.13	-9.65957e-05	6162.19	0.00137	6162.19	0.000511756
6811.53	-0.000978732	6811.53	-7.82203e-05	6162.57	0.00139	6162.57	0.000517976
6812.92	-0.00103297	6812.92	-8.02909e-05	6162.95	0.00136	6162.95	0.000529665
6814.31	-0.000993763	6814.31	-9.73721e-05	6163.33	0.00137	6163.33	0.000487707
6815.7	-0.00100358	6815.7	-9.9401e-06	6163.71	0.00138	6163.71	0.000512223
6817.1	-0.00100384	6817.1	-0.000148767	6164.09	0.00138	6164.09	0.000525648
6818.49	-0.000973102	6818.49	-4.23991e-05	6164.47	0.00136	6164.47	0.000528421
6819.89	-0.00100559	6819.89	-5.33218e-05	6164.85	0.00136	6164.85	0.000517017
6821.28	-0.000968039	6821.28	-8.95562e-05	6165.23	0.00137	6165.23	0.000511653
6822.68	-0.00100249	6822.68	-6.67853e-06	6165.61	0.00136	6165.61	0.000497632
6824.08	-0.00103596	6824.08	-0.000135466	6165.99	0.00141	6165.99	0.000534875
6825.47	-0.000978835	6825.47	-9.437e-05	6166.37	0.00133	6166.37	0.000485918
6826.87	-0.00102326	6826.87	-5.9016e-05	6166.75	0.00135	6166.75	0.000493019
6828.27	-0.000967213	6828.27	-0.000109794	6167.13	0.00137	6167.13	0.000494263
6829.67	-0.00102837	6829.67	-1.57902e-05	6167.51	0.00136	6167.51	0.00050253
6831.07	-0.000998206	6831.07	-7.47522e-05	6167.89	0.00134	6167.89	0.000483923
6832.47	-0.00100156	6832.47	-0.000121388	6168.27	0.00135	6168.27	0.000499109
6833.87	-0.00107439	6833.87	3.8829e-07	6168.65	0.00134	6168.65	0.000503696
6835.27	-0.00105631	6835.27	-0.000144006	6169.03	0.00135	6169.03	0.000488121
6836.67	-0.000961892	6836.67	-7.13876e-05	6169.41	0.00133	6169.41	0.000483379
6838.07	-0.000958483	6838.07	3.43261e-05	6169.79	0.00133	6169.79	0.000474723
6839.48	-0.000988237	6839.48	-0.000158497	6170.17	0.00134	6170.17	0.000499032
6840.88	-0.000989734	6840.88	-3.02855e-05	6170.55	0.00132	6170.55	0.000499083
6842.29	-0.00102532	6842.29	-7.24747e-05	6170.93	0.00133	6170.93	0.000492034
6843.69	-0.000965146	6843.69	-8.63988e-05	6171.32	0.0013	6171.32	0.000482109
6845.1	-0.000997947	6845.1	-4.43663e-05	6171.7	0.00131	6171.7	0.00045902
6846.5	-0.000966438	6846.5	-0.000142142	6172.08	0.00133	6172.08	0.000476745
6847.91	-0.0010137	6847.91	-2.26237e-05	6172.46	0.00133	6172.46	0.000456791
6849.32	-0.000988133	6849.32	-8.05497e-05	6172.84	0.00131	6172.84	0.000466042
6850.72	-0.000979868	6850.72	-7.14394e-05	6173.22	0.00129	6173.22	0.000454588
6852.13	-0.00099335	6852.13	-4.00179e-05	6173.6	0.00132	6173.6	0.000484493
6853.54	-0.00102527	6853.54	-6.83853e-05	6173.98	0.00132	6173.98	0.000466897
6854.95	-0.00101794	6854.95	-0.000107155	6174.36	0.00128	6174.36	0.0004762
6856.36	-0.00110888	6856.36	-1.51171e-05	6174.75	0.00128	6174.75	0.000490946
6857.77	-0.00109468	6857.77	-0.000135104	6175.13	0.00128	6175.13	0.000471406
6859.18	-0.00110072	6859.18	-8.06532e-05	6175.51	0.00128	6175.51	0.000458786
6860.59	-0.0011741	6860.59	-0.000126667	6175.89	0.00129	6175.89	0.000434662
6862	-0.00112567	6862	-0.000139503	6176.27	0.00127	6176.27	0.000426137
6863.42	-0.00119801	6863.42	-9.5457e-05	6176.65	0.00129	6176.65	0.00044342
6864.83	-0.00122103	6864.83	-0.000153632	6177.03	0.0013	6177.03	0.000463062
6866.25	-0.00123445	6866.25	-0.000141314	6177.42	0.00125	6177.42	0.000438548
6867.66	-0.00124075	6867.66	-0.000112486	6177.8	0.00125	6177.8	0.000464358
6869.08	-0.00122573	6869.08	-0.000193636	6178.18	0.00126	6178.18	0.000457802
6870.49	-0.00124266	6870.49	-0.000131947	6178.56	0.00125	6178.56	0.000443161
6871.91	-0.00124695	6871.91	-0.000144575	6178.94	0.00127	6178.94	0.000435102
6873.32	-0.00119506	6873.32	-0.000140745	6179.32	0.00124	6179.32	0.000428495
6874.74	-0.00117787	6874.74	-8.58294e-05	6179.71	0.00125	6179.71	0.000433314
6876.16	-0.00106638	6876.16	-0.000113366	6180.09	0.00125	6180.09	0.00042225
6877.58	-0.00112592	6877.58	-8.71234e-05	6180.47	0.00126	6180.47	0.000444016
6879	-0.00123322	6879	-9.70098e-05	6180.85	0.00124	6180.85	0.000439326
6880.42	-0.00117415	6880.42	-0.000148146	6181.23	0.00123	6181.23	0.000434973
6881.84	-0.0011914	6881.84	-6.41407e-05	6181.62	0.00122	6181.62	0.000397583
6883.26	-0.00121484	6883.26	-0.000134483	6182	0.00122	6182	0.000433081
6884.68	-0.0010749	6884.68	1.84053e-05	6182.38	0.00121	6182.38	0.000415047
6886.1	-0.00126961	6886.1	-0.000179974	6182.76	0.00125	6182.76	0.000434221
6887.53	-0.00113496	6887.53	-0.000106534	6183.14	0.00125	6183.14	0.000454744
6888.95	-0.00116698	6888.95	-7.29923e-05	6183.53	0.00122	6183.53	0.000403879
6890.37	-0.001141	6890.37	-7.99803e-05	6183.91	0.00124	6183.91	0.000427173
6891.8	-0.00106225	6891.8	-0.000217129	6184.29	0.00124	6184.29	0.000452515
6893.22	-0.00119749	6893.22	-7.35099e-05	6184.67	0.00123	6184.67	0.000418545
6894.65	-0.00111436	6894.65	-0.000158859	6185.06	0.0012	6185.06	0.000430438
6896.08	-0.00110072	6896.08	-7.65122e-05	6185.44	0.00121	6185.44	0.00042624
6897.5	-0.00112546	6897.5	-1.79645e-05	6185.82	0.00125	6185.82	0.000436372
6898.93	-0.00108105	6898.93	-6.51242e-05	6186.2	0.00122	6186.2	0.000414917
6900.36	-0.00114307	6900.36	2.89924e-06	6186.59	0.00121	6186.59	0.000395018
6901.79	-0.00111446	6901.79	-9.18337e-05	6186.97	0.00122	6186.97	0.000410953
6903.22	-0.00107397	6903.22	-5.28042e-05	6187.35	0.00122	6187.35	0.000419503
6904.65	-0.00114462	6904.65	-4.91288e-05	6187.74	0.00123	6187.74	0.000431423
6906.08	-0.0010765	6906.08	-8.526e-05	6188.12	0.00121	6188.12	0.000432381
6907.51	-0.00108905	6907.51	-2.25202e-05	6188.5	0.00121	6188.5	0.000424919
6908.94	-0.00109251	6908.94	-4.00179e-05	6188.88	0.00121	6188.88	0.000415772
6910.37	-0.00108162	6910.37	-5.59619e-05	6189.27	0.00126	6189.27	0.000423753
6911.81	-0.00114787	6911.81	-1.49101e-05	6189.65	0.00123	6189.65	0.000450572
6913.24	-0.00109902	6913.24	-6.18631e-05	6190.03	0.00121	6190.03	0.000397972
6914.67	-0.00121633	6914.67	9.57782e-07	6190.42	0.00125	6190.42	0.000418907
6916.11	-0.00111704	6916.11	-9.13161e-05	6190.8	0.00123	6190.8	0.000424582
6917.54	-0.00108311	6917.54	-0.000107103	6191.18	0.00122	6191.18	0.000413933
6918.98	-0.00106602	6918.98	-1.86379e-06	6191.57	0.00123	6191.57	0.00041357
6920.42	-0.00100947	6920.42	1.37196e-06	6191.95	0.00121	6191.95	0.000381468
6921.85	-0.00098741	6921.85	3.88566e-05	6192.33	0.00122	6192.33	0.00039805
6923.29	-0.00110656	6923.29	2.75953e-05	6192.72	0.00124	6192.72	0.000425256
6924.73	-0.0010325	6924.73	-4.39004e-05	6193.1	0.00119	6193.1	0.000407895
6926.17	-0.00110821	6926.17	1.17006e-05	6193.48	0.00123	6193.48	0.000414788
6927.61	-0.00110036	6927.61	-5.5703e-05	6193.87	0.00122	6193.87	0.000395977
6929.05	-0.00111157	6929.05	-3.02855e-05	6194.25	0.00122	6194.25	0.000393386
6930.49	-0.00108973	6930.49	-6.43477e-05	6194.64	0.00124	6194.64	0.000414529
6931.93	-0.00102052	6931.93	1.13898e-06	6195.02	0.00122	6195.02	0.000403802
6933.37	-0.00105538	6933.37	2.744e-05	6195.4	0.00122	6195.4	0.000394941
6934.81	-0.0010528	6934.81	4.24532e-06	6195.79	0.00118	6195.79	0.000381286
6936.26	-0.0010639	6936.26	-8.23613e-05	6196.17	0.0012	6196.17	0.000398723
6937.7	-0.00106323	6937.7	5.11019e-05	6196.55	0.00122	6196.55	0.000413466
6939.14	-0.00102672	6939.14	4.11089e-05	6196.94	0.00122	6196.94	0.000383022
6940.59	-0.00103901	6940.59	2.95628e-05	6197.32	0.00121	6197.32	0.000373281
6942.03	-0.00102305	6942.03	5.54254e-05	6197.71	0.00119	6197.71	0.000391132
6943.48	-0.00107289	6943.48	-7.29978e-06	6198.09	0.00125	6198.09	0.000405745
6944.93	-0.00110429	6944.93	-1.18038e-05	6198.47	0.00118	6198.47	0.000395174
6946.37	-0.00109401	6946.37	-6.01031e-05	6198.86	0.00117	6198.86	0.000383981
6947.82	-0.00102914	6947.82	1.55316e-06	6199.24	0.00121	6199.24	0.000361259
6949.27	-0.00100719	6949.27	9.70735e-06	6199.63	0.00122	6199.63	0.000392013
6950.72	-0.00101339	6950.72	3.89084e-05	6200.01	0.00121	6200.01	0.000400718
6952.17	-0.00109721	6952.17	3.14526e-05	6200.4	0.00121	6200.4	0.000389085
6953.62	-0.00116501	6953.62	-9.65439e-05	6200.78	0.00119	6200.78	0.000372788
6955.07	-0.0010263	6955.07	-5.42536e-05	6201.17	0.0012	6201.17	0.000405771
6956.52	-0.00106416	6956.52	-2.32973e-06	6201.55	0.00119	6201.55	0.000393256
6957.97	-0.000983588	6957.97	0.000154463	6201.93	0.00121	6201.93	0.000374861
6959.43	-0.00105605	6959.43	0.000131521	6202.32	0.0012	6202.32	0.000382504
6960.88	-0.00095156	6960.88	4.83577e-05	6202.7	0.00121	6202.7	0.000383152
6962.33	-0.00102486	6962.33	3.80525e-06	6203.09	0.00119	6203.09	0.000379525
6963.79	-0.00104505	6963.79	2.89674e-05	6203.47	0.00116	6203.47	0.000354316
6965.24	-0.000991181	6965.24	1.68521e-05	6203.86	0.0012	6203.86	0.000379317
6966.7	-0.00102475	6966.7	5.54772e-05	6204.24	0.0012	6204.24	0.000384706
6968.16	-0.00111586	6968.16	-6.41967e-06	6204.63	0.00117	6204.63	0.000371959
6969.61	-0.00103266	6969.61	2.01911e-06	6205.01	0.00119	6205.01	0.000365819
6971.07	-0.0011157	6971.07	-6.08795e-05	6205.4	0.00119	6205.4	0.000371882
6972.53	-0.00107816	6972.53	-5.03194e-05	6205.78	0.00117	6205.78	0.000361907
6973.99	-0.00103689	6973.99	5.43639e-05	6206.17	0.0012	6206.17	0.000373721
6975.45	-0.000942933	6975.45	1.90525e-05	6206.55	0.00116	6206.55	0.000357788
6976.91	-0.00103261	6976.91	1.00698e-05	6206.94	0.00114	6206.94	0.00035043
6978.37	-0.00110449	6978.37	2.2262e-06	6207.32	0.00114	6207.32	0.000340482
6979.83	-0.00108683	6979.83	-3.70671e-05	6207.71	0.00117	6207.71	0.00034429
6981.29	-0.00107258	6981.29	-5.17171e-05	6208.1	0.00114	6208.1	0.000337322
6982.75	-0.00109257	6982.75	-5.47713e-05	6208.48	0.00115	6208.48	0.000330223
6984.22	-0.00105889	6984.22	-3.41681e-05	6208.87	0.00114	6208.87	0.000337348
6985.68	-0.00108652	6985.68	1.3435e-05	6209.25	0.00114	6209.25	0.000340586
6987.14	-0.00103214	6987.14	-3.9552e-05	6209.64	0.00115	6209.64	0.000347062
6988.61	-0.00100198	6988.61	1.10017e-05	6210.02	0.00115	6210.02	0.00034657
6990.07	-0.00102124	6990.07	1.71368e-05	6210.41	0.00113	6210.41	0.00034543
6991.54	-0.00101856	6991.54	-9.03844e-05	6210.79	0.00113	6210.79	0.000330249
6993.01	-0.00107578	6993.01	-4.91831e-06	6211.18	0.00113	6211.18	0.000356208
6994.47	-0.00104846	6994.47	-9.28689e-05	6211.57	0.0011	6211.57	0.000287274
6995.94	-0.00101794	6995.94	0.00010366	6211.95	0.00112	6211.95	0.000317944
6997.41	-0.000970209	6997.41	-4.71122e-06	6212.34	0.00113	6212.34	0.000337348
6998.88	-0.00101195	6998.88	4.56911e-05	6212.72	0.00113	6212.72	0.00033657
7000.35	-0.00102734	7000.35	8.52509e-05	6213.11	0.0011	6213.11	0.000311028
7001.82	-0.00104572	7001.82	-0.000103221	6213.5	0.00111	6213.5	0.000355301
7003.29	-0.00101504	7003.29	-3.62403e-07	6213.88	0.00112	6213.88	0.000336778
7004.76	-0.00100471	7004.76	-5.47195e-05	6214.27	0.00108	6214.27	0.000312971
7006.24	-0.000951095	7006.24	-9.6958e-05	6214.65	0.0011	6214.65	0.000312712
7007.71	-0.0010059	7007.71	0.000137839	6215.04	0.00112	6215.04	0.000326104
7009.18	-0.000993505	7009.18	6.18679e-06	6215.43	0.00114	6215.43	0.000324369
7010.66	-0.000978164	7010.66	2.59385e-05	6215.81	0.00113	6215.81	0.000329964
7012.13	-0.00102584	7012.13	1.13898e-06	6216.2	0.0011	6216.2	0.000318825
7013.61	-0.000978732	7013.61	-8.526e-05	6216.59	0.00112	6216.59	0.00030551
7015.08	-0.000993092	7015.08	-1.03544e-06	6216.97	0.00111	6216.97	0.00033385
7016.56	-0.000962925	7016.56	3.9685e-05	6217.36	0.00112	6217.36	0.000330793
7018.04	-0.00100885	7018.04	4.71927e-05	6217.75	0.0011	6217.75	0.00032999
7019.51	-0.000987565	7019.51	-2.10189e-05	6218.13	0.00111	6218.13	0.000307194
7020.99	-0.000987513	7020.99	-1.06131e-05	6218.52	0.00111	6218.52	0.000331389
7022.47	-0.00104423	7022.47	-7.58393e-05	6218.91	0.00111	6218.91	0.000310173
7023.95	-0.00106292	7023.95	-7.74439e-05	6219.29	0.0011	6219.29	0.000295459
7025.43	-0.00103111	7025.43	-2.53157e-05	6219.68	0.00112	6219.68	0.000336855
7026.91	-0.00102408	7026.91	-1.20627e-05	6220.07	0.00109	6220.07	0.0003217
7028.39	-0.000965301	7028.39	-1.59455e-05	6220.45	0.00111	6220.45	0.000310613
7029.88	-0.00107289	7029.88	-2.18472e-05	6220.84	0.00108	6220.84	0.000313048
7031.36	-0.00107268	7031.36	-0.000137485	6221.23	0.00109	6221.23	0.000308929
7032.84	-0.00112541	7032.84	-3.50482e-05	6221.61	0.0011	6221.61	0.000301417
7034.33	-0.00117885	7034.33	-5.93784e-05	6222	0.0011	6222	0.00030007
7035.81	-0.00117111	7035.81	-2.48505e-06	6222.39	0.0011	6222.39	0.00033284
7037.3	-0.00114648	7037.3	-0.000103842	6222.78	0.00109	6222.78	0.000319706
7038.78	-0.00115262	7038.78	-2.48498e-05	6223.16	0.00109	6223.16	0.000297713
7040.27	-0.00112133	7040.27	-6.30019e-05	6223.55	0.00112	6223.55	0.000337762
7041.76	-0.00119795	7041.76	-8.08602e-05	6223.94	0.00109	6223.94	0.000287378
7043.25	-0.00117663	7043.25	-0.000134897	6224.32	0.00107	6224.32	0.000289787
7044.73	-0.00115494	7044.73	-0.000153994	6224.71	0.0011	6224.71	0.000329576
7046.22	-0.00117312	7046.22	-0.000198862	6225.1	0.00111	6225.1	0.000306287
7047.71	-0.00112355	7047.71	-0.00011409	6225.49	0.00108	6225.49	0.000287067
7049.2	-0.00107991	7049.2	-6.15525e-05	6225.87	0.00109	6225.87	0.000297117
7050.69	-0.00107542	7050.69	1.7111e-05	6226.26	0.0011	6226.26	0.000285176
7052.19	-0.00113615	7052.19	4.16766e-06	6226.65	0.00109	6226.65	0.000295718
7053.68	-0.00106483	7053.68	-0.000138106	6227.04	0.00109	6227.04	0.000299008
7055.17	-0.00109892	7055.17	1.81202e-06	6227.43	0.00108	6227.43	0.000282534
7056.67	-0.00101649	7056.67	-6.22254e-05	6227.81	0.00108	6227.81	0.00029147
7058.16	-0.000994383	7058.16	-2.91466e-05	6228.2	0.00106	6228.2	0.000291315
7059.65	-0.00111162	7059.65	3.1116e-05	6228.59	0.0011	6228.59	0.000320483
7061.15	-0.00102935	7061.15	-5.19759e-05	6228.98	0.0011	6228.98	0.000284295
7062.65	-0.00109484	7062.65	-5.03712e-05	6229.37	0.00108	6229.37	0.00029419
7064.14	-0.00112195	7064.14	-4.32274e-05	6229.75	0.00108	6229.75	0.000292973
7065.64	-0.00118246	7065.64	-0.00020678	6230.14	0.00103	6230.14	0.000291911
7067.14	-0.00108704	7067.14	-7.86345e-05	6230.53	0.00103	6230.53	0.000294656
7068.64	-0.00126579	7068.64	-0.000303485	6230.92	0.00107	6230.92	0.000304914
7070.14	-0.00106334	7070.14	-7.11806e-05	6231.31	0.00108	6231.31	0.000304189
7071.64	-0.000999755	7071.64	-8.73305e-05	6231.69	0.00106	6231.69	0.000304992
7073.14	-0.000797539	7073.14	-3.09067e-05	6232.08	0.00104	6232.08	0.000304034
7074.64	-0.00105161	7074.64	0.00013121	6232.47	0.00107	6232.47	0.000298853
7076.14	-0.000861045	7076.14	-4.91831e-06	6232.86	0.00106	6232.86	0.000302324
7077.64	-0.00104557	7077.64	5.44675e-05	6233.25	0.00105	6233.25	0.000287144
7079.14	-0.0010339	7079.14	-7.59428e-05	6233.64	0.00106	6233.64	0.000307816
7080.65	-0.00109706	7080.65	-3.14762e-05	6234.03	0.00107	6234.03	0.000288569
7082.15	-0.00108699	7082.15	-0.000124752	6234.41	0.00108	6234.41	0.000333902
7083.66	-0.000969847	7083.66	-5.73595e-05	6234.8	0.00107	6234.8	0.000278933
7085.16	-0.00100755	7085.16	2.0994e-05	6235.19	0.00109	6235.19	0.000294268
7086.67	-0.000986532	7086.67	-5.54442e-05	6235.58	0.00106	6235.58	0.000310484
7088.18	-0.00101251	7088.18	-3.31328e-05	6235.97	0.00107	6235.97	0.000309059
7089.68	-0.00106075	7089.68	-9.09538e-05	6236.36	0.00108	6236.36	0.000302479
7091.19	-0.00108838	7091.19	-0.000229134	6236.75	0.00106	6236.75	0.000288543
7092.7	-0.00126791	7092.7	-0.000129825	6237.14	0.00109	6237.14	0.000323151
7094.21	-0.00102852	7094.21	-0.000246934	6237.53	0.00109	6237.53	0.00030077
7095.72	-0.0011377	7095.72	-8.67093e-05	6237.91	0.00106	6237.91	0.00030108
7097.23	-0.000992059	7097.23	-2.55228e-05	6238.3	0.00105	6238.3	0.000290123
7098.74	-0.00086647	7098.74	0.000113421	6238.69	0.00105	6238.69	0.000311986
7100.26	-0.000854845	7100.26	8.45518e-05	6239.08	0.00105	6239.08	0.00027914
7101.77	-0.000998567	7101.77	-6.90583e-05	6239.47	0.00105	6239.47	0.000301573
7103.28	-0.00120043	7103.28	-5.32183e-05	6239.86	0.00108	6239.86	0.000325431
7104.8	-0.00118623	7104.8	-0.000243622	6240.25	0.00109	6240.25	0.0003274
7106.31	-0.00104071	7106.31	-0.000147214	6240.64	0.00107	6240.64	0.000326027
7107.83	-0.000982503	7107.83	3.45074e-05	6241.03	0.00104	6241.03	0.000294812
7109.34	-0.000946446	7109.34	9.07398e-05	6241.42	0.00104	6241.42	0.000295097
7110.86	-0.000834228	7110.86	6.77748e-05	6241.81	0.00106	6241.81	0.000303075
7112.38	-0.000934409	7112.38	2.30909e-05	6242.2	0.00107	6242.2	0.000313463
7113.89	-0.00107067	7113.89	-3.47376e-05	6242.59	0.00107	6242.59	0.000325897
7115.41	-0.00131942	7115.41	-0.000333283	6242.98	0.00109	6242.98	0.000338047
7116.93	-0.00100833	7116.93	-0.000102703	6243.37	0.00108	6243.37	0.000326338
7118.45	-0.00107067	7118.45	-0.000267889	6243.76	0.00108	6243.76	0.00034727
7119.97	-0.000852933	7119.97	-0.000175523	6244.15	0.00108	6244.15	0.000331078
7121.49	-0.000849574	7121.49	0.000176397	6244.54	0.00107	6244.54	0.000323592
7123.01	-0.000810354	7123.01	-2.7439e-06	6244.93	0.0011	6244.93	0.000326338
7124.54	-0.000903464	7124.54	7.53606e-05	6245.32	0.00111	6245.32	0.000343099
7126.06	-0.00097398	7126.06	-4.59193e-05	6245.71	0.00111	6245.71	0.000330897
7127.58	-0.000928727	7127.58	-0.000125995	6246.1	0.00114	6246.1	0.000350767
7129.11	-0.000995468	7129.11	-1.9414e-05	6246.49	0.00111	6246.49	0.000355353
7130.63	-0.000965146	7130.63	-9.8252e-05	6246.88	0.00112	6246.88	0.000359394
7132.16	-0.00103452	7132.16	-8.65023e-05	6247.27	0.00113	6247.27	0.000357062
7133.69	-0.00110351	7133.69	-0.000174126	6247.66	0.00112	6247.66	0.000364135
7135.21	-0.001103	7135.21	-0.00034094	6248.05	0.00115	6248.05	0.000378385
7136.74	-0.00109701	7136.74	-6.33642e-05	6248.44	0.00117	6248.44	0.000391909
7138.27	-0.00109856	7138.27	-0.000313832	6248.83	0.00117	6248.83	0.000404683
7139.8	-0.00101148	7139.8	-9.0695e-05	6249.22	0.00118	6249.22	0.000410953
7141.33	-0.00093973	7141.33	-7.93074e-05	6249.61	0.00118	6249.61	0.000401703
7142.86	-0.000860218	7142.86	-7.27335e-05	6250	0.00119	6250	0.000406626
7144.39	-0.000885742	7144.39	7.44803e-05	6250.39	0.00121	6250.39	0.000419788
7145.92	-0.000785808	7145.92	-0.000153166	6250.78	0.00118	6250.78	0.000414321
7147.45	-0.000826632	7147.45	0.000233451	6251.17	0.00122	6251.17	0.000426603
7148.98	-0.000861097	7148.98	-0.000107413	6251.56	0.00122	6251.56	0.000435931
7150.52	-0.000911575	7150.52	6.60142e-05	6251.95	0.00118	6251.95	0.000428987
7152.05	-0.00095373	7152.05	4.95227e-05	6252.34	0.00123	6252.34	0.000446555
7153.59	-0.000893647	7153.59	-8.99703e-05	6252.74	0.00123	6252.74	0.000455625
7155.12	-0.000890341	7155.12	-5.25971e-05	6253.13	0.00124	6253.13	0.000488199
7156.66	-0.000953575	7156.66	-0.000135104	6253.52	0.00124	6253.52	0.000477056
7158.2	-0.0011237	7158.2	-0.000251953	6253.91	0.00125	6253.91	0.0004528
7159.73	-0.00110227	7159.73	-0.000353821	6254.3	0.00125	6254.3	0.000476071
7161.27	-0.00098741	7161.27	-0.000170917	6254.69	0.00124	6254.69	0.000453059
7162.81	-0.000846939	7162.81	-7.25782e-05	6255.08	0.00128	6255.08	0.000490013
7164.35	-0.000873807	7164.35	-0.000133913	6255.47	0.00129	6255.47	0.000506832
7165.89	-0.000856601	7165.89	-0.000105498	6255.86	0.0013	6255.86	0.00051427
7167.43	-0.000769271	7167.43	-0.000106378	6256.26	0.00132	6256.26	0.000510305
7168.97	-0.000694379	7168.97	-1.73433e-05	6256.65	0.00133	6256.65	0.000520127
7170.51	-0.00067515	7170.51	8.34903e-05	6257.04	0.00133	6257.04	0.000526037
7172.06	-0.000548643	7172.06	0.000218999	6257.43	0.00132	6257.43	0.000520983
7173.6	-0.000692105	7173.6	8.02472e-06	6257.82	0.00135	6257.82	0.000554365
7175.15	-0.00076064	7175.15	-7.55864e-06	6258.21	0.00138	6258.21	0.0005624
7176.69	-0.000777281	7176.69	3.35236e-05	6258.61	0.00135	6258.61	0.000545682
7178.24	-0.00094531	7178.24	-0.000189237	6259	0.00136	6259	0.000532775
7179.78	-0.00113367	7179.78	-0.000169365	6259.39	0.00135	6259.39	0.000536352
7181.33	-0.00086368	7181.33	-0.000338353	6259.78	0.00138	6259.78	0.000548274
7182.88	-0.000583078	7182.88	-0.000158186	6260.17	0.00137	6260.17	0.000544127
7184.42	-0.000417288	7184.42	0.000279166	6260.56	0.0014	6260.56	0.000585028
7185.97	-0.000567515	7185.97	0.000168369	6260.96	0.00143	6260.96	0.000585443
7187.52	-0.00056705	7187.52	0.000108165	6261.35	0.00143	6261.35	0.000591172
7189.07	-0.00064279	7189.07	3.22551e-05	6261.74	0.00143	6261.74	0.000602577
7190.62	-0.000650596	7190.62	-2.10707e-05	6262.13	0.00143	6262.13	0.000603821
7192.17	-0.000744877	7192.17	-4.85594e-05	6262.52	0.00143	6262.52	0.000615772
7193.73	-0.00059559	7193.73	-4.24509e-05	6262.92	0.00146	6262.92	0.000622719
7195.28	-0.00074467	7195.28	-0.00013412	6263.31	0.00151	6263.31	0.000649991
7196.83	-0.000643566	7196.83	-0.000136553	6263.7	0.00149	6263.7	0.000644314
7198.39	-0.000671325	7198.39	-2.43839e-05	6264.09	0.00153	6264.09	0.000674491
7199.94	-0.00105461	7199.94	-0.000117817	6264.49	0.00155	6264.49	0.000688543
7201.5	-0.00100368	7201.5	-0.000587835	6264.88	0.00153	6264.88	0.000679287
7203.05	-0.00116233	7203.05	-0.000215163	6265.27	0.00152	6265.27	0.000663135
7204.61	-0.000899434	7204.61	-0.000343009	6265.66	0.00158	6265.66	0.000690798
7206.17	-0.00089685	7206.17	-0.000162533	6266.06	0.00156	6266.06	0.000705292
7207.73	-0.000636794	7207.73	-5.26489e-05	6266.45	0.00158	6266.45	0.000720097
7209.29	-0.00111658	7209.29	-0.000153373	6266.84	0.00156	6266.84	0.000702699
7210.85	-0.0011804	7210.85	-0.000145403	6267.23	0.00157	6267.23	0.000699147
7212.41	-0.00129031	7212.41	-0.000322989	6267.63	0.0016	6267.63	0.000730469
7213.97	-0.00122883	7213.97	-0.000231255	6268.02	0.0016	6268.02	0.000736096
7215.53	-0.00144658	7215.53	-0.00032842	6268.41	0.00163	6268.41	0.00071963
7217.09	-0.00131385	7217.09	-0.000323661	6268.81	0.00163	6268.81	0.000704307
7218.65	-0.00132613	7218.65	-0.000333594	6269.2	0.00163	6269.2	0.000731791
7220.22	-0.00126228	7220.22	-0.000355062	6269.59	0.00163	6269.59	0.000738326
7221.78	-0.00129041	7221.78	-0.000214024	6269.99	0.00162	6269.99	0.000705577
7223.35	-0.00116496	7223.35	-0.000252211	6270.38	0.00165	6270.38	0.000745871
7224.91	-0.0012789	7224.91	-0.00020145	6270.77	0.00171	6270.77	0.000778234
7226.48	-0.00135018	7226.48	-0.000310624	6271.17	0.00171	6271.17	0.000786662
7228.04	-0.00158222	7228.04	-0.000295621	6271.56	0.0017	6271.56	0.000772321
7229.61	-0.00122945	7229.61	-0.000641808	6271.95	0.00171	6271.95	0.000768561
7231.18	-0.00170528	7231.18	-0.000440666	6272.35	0.00172	6272.35	0.000779427
7232.75	-0.00133671	7232.75	-0.00037115	6272.74	0.00172	6272.74	0.000776885
7234.32	-0.00116073	7234.32	-0.000317298	6273.13	0.0017	6273.13	0.000754195
7235.89	-0.000867865	7235.89	-0.000188512	6273.53	0.00169	6273.53	0.00073747
7237.46	-0.00141402	7237.46	-0.000139089	6273.92	0.00171	6273.92	0.000759848
7239.03	-0.0013924	7239.03	-0.000275391	6274.31	0.00172	6274.31	0.000780127
7240.61	-0.0014423	7240.61	-0.000490728	6274.71	0.00174	6274.71	0.000769209
7242.18	-0.00134358	7242.18	-0.000278392	6275.1	0.0017	6275.1	0.000750513
7243.75	-0.00127142	7243.75	-0.000342129	6275.49	0.00169	6275.49	0.000762156
7245.33	-0.00128112	7245.33	-0.000462129	6275.89	0.00169	6275.89	0.000720175
7246.9	-0.000779296	7246.9	0.000149388	6276.28	0.00168	6276.28	0.000723053
7248.48	-0.00117436	7248.48	-0.000280772	6276.68	0.00167	6276.68	0.000746001
7250.05	-0.00123136	7250.05	-0.000312849	6277.07	0.00167	6277.07	0.000737859
7251.63	-0.00147496	7251.63	-0.000342388	6277.46	0.00163	6277.46	0.000724064
7253.21	-0.00117617	7253.21	-0.000310779	6277.86	0.00163	6277.86	0.000689684
7254.79	-0.00105538	7254.79	-0.000305968	6278.25	0.00158	6278.25	0.000693702
7256.37	-0.00104386	7256.37	-0.000115177	6278.65	0.00156	6278.65	0.000691421
7257.95	-0.00111513	7257.95	-0.00010203	6279.04	0.00155	6279.04	0.000674283
7259.53	-0.00121003	7259.53	-0.000215939	6279.43	0.00154	6279.43	0.000649058
7261.11	-0.00116016	7261.11	-0.000311348	6279.83	0.00151	6279.83	0.000639543
7262.69	-0.00128179	7262.69	-0.000200156	6280.22	0.00149	6280.22	0.000635655
7264.27	-0.00107811	7264.27	-0.000260076	6280.62	0.00145	6280.62	0.000606751
7265.86	-0.00114854	7265.86	-0.000194567	6281.01	0.00142	6281.01	0.000595371
7267.44	-0.00110233	7267.44	-0.000189444	6281.41	0.00139	6281.41	0.000565148
7269.03	-0.00118376	7269.03	-0.000217232	6281.8	0.00141	6281.8	0.000606751
7270.61	-0.00121009	7270.61	-0.000256558	6282.2	0.00137	6282.2	0.000591975
7272.2	-0.00123399	7272.2	-0.000176662	6282.59	0.00136	6282.59	0.000568362
7273.79	-0.00123544	7273.79	-0.000236378	6282.99	0.00132	6282.99	0.000549207
7275.37	-0.00113135	7275.37	-0.000268872	6283.38	0.00134	6283.38	0.000554598
7276.96	-0.00115897	7276.96	-0.00019643	6283.78	0.00133	6283.78	0.000508569
7278.55	-0.0011378	7278.55	-0.000224736	6284.17	0.00129	6284.17	0.000512948
7280.14	-0.00124808	7280.14	-0.000237413	6284.57	0.00127	6284.57	0.000518987
7281.73	-0.00127235	7281.73	-0.000318902	6284.96	0.00127	6284.96	0.000515488
7283.32	-0.00125676	7283.32	-0.000197155	6285.36	0.00126	6285.36	0.000540265
7284.91	-0.00130084	7284.91	-0.000359407	6285.75	0.00125	6285.75	0.000521968
7286.51	-0.00127844	7286.51	-0.000227168	6286.15	0.00124	6286.15	0.000517303
7288.1	-0.00129475	7288.1	-0.00035889	6286.54	0.00123	6286.54	0.00048965
7289.69	-0.00121928	7289.69	-0.000246623	6286.94	0.00127	6286.94	0.000491076
7291.29	-0.0012437	7291.29	-0.000352165	6287.33	0.00125	6287.33	0.000501623
7292.88	-0.00118768	7292.88	-0.000242277	6287.73	0.00122	6287.73	0.000458864
7294.48	-0.0011724	7294.48	-0.000195913	6288.12	0.00126	6288.12	0.000503334
7296.07	-0.0011583	7296.07	-4.06908e-05	6288.52	0.00123	6288.52	0.000495559
7297.67	-0.0010655	7297.67	-9.01256e-05	6288.91	0.00119	6288.91	0.000477211
7299.27	-0.00118546	7299.27	-0.000120043	6289.31	0.00121	6289.31	0.000461455
7300.87	-0.00108967	7300.87	-0.000169882	6289.7	0.00118	6289.7	0.000461015
7302.47	-0.00108688	7302.47	-0.000117713	6290.1	0.00124	6290.1	0.000491516
7304.07	-0.00110413	7304.07	-0.000146593	6290.5	0.00121	6290.5	0.00046498
7305.67	-0.0011805	7305.67	-0.000256092	6290.89	0.00122	6290.89	0.000462129
7307.27	-0.00106938	7307.27	-0.000117765	6291.29	0.00119	6291.29	0.000436087
7308.87	-0.00108234	7308.87	-0.000326817	6291.68	0.00116	6291.68	0.000434947
7310.48	-0.00115624	7310.48	-0.00021687	6292.08	0.00118	6292.08	0.000411031
7312.08	-0.00117792	7312.08	-0.000261163	6292.47	0.00116	6292.47	0.000408077
7313.68	-0.00107661	7313.68	-0.000366598	6292.87	0.0012	6292.87	0.000445856
7315.29	-0.00137083	7315.29	-0.000191617	6293.27	0.00116	6293.27	0.000433029
7316.89	-0.00151071	7316.89	-0.000351751	6293.66	0.00116	6293.66	0.000406704
7318.5	-0.00148734	7318.5	-0.000301105	6294.06	0.0012	6294.06	0.000388878
7320.11	-0.00155694	7320.11	-0.000374771	6294.45	0.00119	6294.45	0.000407792
7321.72	-0.00167619	7321.72	-0.00037565	6294.85	0.00115	6294.85	0.000402998
7323.32	-0.00155199	7323.32	-0.000601794	6295.25	0.00119	6295.25	0.000414684
7324.93	-0.00154487	7324.93	-0.000288843	6295.64	0.00118	6295.64	0.000387453
7326.54	-0.00159093	7326.54	-0.000440666	6296.04	0.00115	6296.04	0.000375276
7328.15	-0.00138631	7328.15	-0.000265923	6296.44	0.00119	6296.44	0.000391287
7329.77	-0.00100156	7329.77	-3.69118e-05	6296.83	0.00117	6296.83	0.00038297
7331.38	-0.0011993	7331.38	-0.000330852	6297.23	0.00113	6297.23	0.000383489
7332.99	-0.00128726	7332.99	9.22933e-05	6297.63	0.00117	6297.63	0.000373203
7334.6	-0.00107697	7334.6	-0.000188461	6298.02	0.00116	6298.02	0.000381053
7336.22	-0.00119723	7336.22	-0.000193273	6298.42	0.00114	6298.42	0.000381571
7337.83	-0.00141412	7337.83	-0.000289464	6298.82	0.00118	6298.82	0.000349161
7339.45	-0.00132092	7339.45	-0.000427995	6299.21	0.00117	6299.21	0.000393801
7341.07	-0.000947789	7341.07	-0.00032661	6299.61	0.00114	6299.61	0.000370742
7342.68	-0.00115866	7342.68	-0.000228358	6300.01	0.00116	6300.01	0.000367529
7344.3	-0.00106788	7344.3	-0.000158756	6300.4	0.00116	6300.4	0.000380639
7345.92	-0.000845027	7345.92	-5.89642e-05	6300.8	0.00117	6300.8	0.000390277
7347.54	-0.000936166	7347.54	-3.46858e-05	6301.2	0.00117	6301.2	0.000389318
7349.16	-0.000988546	7349.16	-3.19939e-05	6301.59	0.00116	6301.59	0.000398283
7350.78	-0.000878096	7350.78	3.21257e-05	6301.99	0.00113	6301.99	0.000331311
7352.4	-0.00103199	7352.4	-0.000139348	6302.39	0.00114	6302.39	0.000329109
7354.02	-0.0010513	7354.02	-0.000106585	6302.79	0.00115	6302.79	0.000348979
7355.65	-0.00109355	7355.65	-0.000217595	6303.18	0.00115	6303.18	0.000344549
7357.27	-0.000991646	7357.27	-6.19666e-05	6303.58	0.00115	6303.58	0.00033999
7358.89	-0.000878199	7358.89	1.87418e-05	6303.98	0.00113	6303.98	0.000354472
7360.52	-0.000991801	7360.52	-7.66157e-05	6304.38	0.00114	6304.38	0.000346674
7362.14	-0.00102346	7362.14	-7.55805e-05	6304.77	0.00114	6304.77	0.000367995
7363.77	-0.000947531	7363.77	-8.73305e-05	6305.17	0.00114	6305.17	0.000374188
7365.4	-0.00104232	7365.4	-0.000160619	6305.57	0.00115	6305.57	0.000345741
7367.03	-0.000990716	7367.03	-0.000124235	6305.97	0.00114	6305.97	0.000353358
7368.65	-0.00100043	7368.65	-5.84983e-05	6306.36	0.0011	6306.36	0.000327037
7370.28	-0.000926505	7370.28	-2.04494e-05	6306.76	0.00109	6306.76	0.000337399
7371.91	-0.00100621	7371.91	-7.58393e-05	6307.16	0.00109	6307.16	0.00029906
7373.54	-0.00112407	7373.54	-0.000147318	6307.56	0.00111	6307.56	0.000353435
7375.18	-0.00107284	7375.18	-0.000126978	6307.95	0.00112	6307.95	0.000356752
7376.81	-0.00120281	7376.81	-0.000284549	6308.35	0.00111	6308.35	0.000333228
7378.44	-0.00112784	7378.44	-0.000208798	6308.75	0.0011	6308.75	0.000335586
7380.07	-0.00118887	7380.07	-0.000265457	6309.15	0.00111	6309.15	0.00033771
7381.71	-0.00113811	7381.71	-0.000258679	6309.55	0.00113	6309.55	0.000332322
7383.34	-0.00119573	7383.34	-0.00013676	6309.94	0.00108	6309.94	0.000307919
7384.98	-0.00109721	7384.98	-0.000212782	6310.34	0.00107	6310.34	0.000298879
7386.62	-0.0011236	7386.62	-0.000113055	6310.74	0.00108	6310.74	0.000287429
7388.25	-0.00126785	7388.25	-0.000192652	6311.14	0.00109	6311.14	0.000307557
7389.89	-0.00119444	7389.89	-0.000206624	6311.54	0.00107	6311.54	0.000294656
7391.53	-0.00121907	7391.53	-0.000189651	6311.94	0.00108	6311.94	0.000331804
7393.17	-0.00111911	7393.17	-0.000197672	6312.33	0.00108	6312.33	0.000285046
7394.81	-0.00120059	7394.81	-0.000161602	6312.73	0.00107	6312.73	0.000300511
7396.45	-0.00113899	7396.45	-0.000211903	6313.13	0.00106	6313.13	0.000288621
7398.09	-0.00109422	7398.09	-0.000130911	6313.53	0.00106	6313.53	0.000294527
7399.73	-0.00108131	7399.73	-0.000167916	6313.93	0.0011	6313.93	0.000324161
7401.38	-0.00103844	7401.38	-6.41925e-05	6314.33	0.00107	6314.33	0.000298723
7403.02	-0.00110274	7403.02	-0.000115695	6314.73	0.00104	6314.73	0.000294009
7404.66	-0.00101701	7404.66	-0.000165639	6315.12	0.00107	6315.12	0.000296444
7406.31	-0.00104077	7406.31	-7.28888e-05	6315.52	0.00108	6315.52	0.000312349
7407.96	-0.00100115	7407.96	-0.000118852	6315.92	0.00108	6315.92	0.000324291
7409.6	-0.00098023	7409.6	-4.58675e-05	6316.32	0.00109	6316.32	0.000301573
7411.25	-0.00100771	7411.25	-7.18017e-05	6316.72	0.00106	6316.72	0.000303697
7412.9	-0.00101096	7412.9	-0.000107621	6317.12	0.00106	6317.12	0.00030165
7414.55	-0.00108373	7414.55	-0.000136294	6317.52	0.00108	6317.52	0.000273261
7416.2	-0.00107805	7416.2	-0.000236844	6317.92	0.00105	6317.92	0.000299345
7417.85	-0.00106292	7417.85	-0.000108293	6318.32	0.00108	6318.32	0.000288621
7419.5	-0.00102052	7419.5	-0.000161912	6318.72	0.00108	6318.72	0.000294579
7421.15	-0.00108038	7421.15	-0.000106016	6319.12	0.0011	6319.12	0.000303904
7422.8	-0.00104221	7422.8	-8.42248e-05	6319.51	0.00106	6319.51	0.000295252
7424.46	-0.00112185	7424.46	-0.000172832	6319.91	0.00108	6319.91	0.000272509
7426.11	-0.00114085	7426.11	-0.000203623	6320.31	0.00109	6320.31	0.00031411
7427.77	-0.00118665	7427.77	-0.000129721	6320.71	0.00108	6320.71	0.000301858
7429.42	-0.00117518	7429.42	-0.000199742	6321.11	0.00109	6321.11	0.000285098
7431.08	-0.00121422	7431.08	-0.000185097	6321.51	0.00109	6321.51	0.000298024
7432.73	-0.00121411	7432.73	-0.000145558	6321.91	0.00106	6321.91	0.000267251
7434.39	-0.00119997	7434.39	-0.000230531	6322.31	0.0011	6322.31	0.000291885
7436.05	-0.00120358	7436.05	-0.000169261	6322.71	0.00107	6322.71	0.000310717
7437.71	-0.00115856	7437.71	-0.000197362	6323.11	0.00109	6323.11	0.000299086
7439.37	-0.001182	7439.37	-0.000153528	6323.51	0.00112	6323.51	0.000305666
7441.03	-0.00109856	7441.03	-0.00018313	6323.91	0.0011	6323.91	0.000325716
7442.69	-0.00114761	7442.69	-0.00012527	6324.31	0.00109	6324.31	0.000308748
7444.35	-0.00118272	7444.35	-0.000246365	6324.71	0.0011	6324.71	0.000314654
7446.02	-0.00110191	7446.02	-0.000120974	6325.11	0.00109	6325.11	0.00031082
7447.68	-0.00112494	7447.68	-0.000154408	6325.51	0.00109	6325.51	0.000293853
7449.34	-0.0011267	7449.34	-0.000151458	6325.91	0.00108	6325.91	0.000317167
7451.01	-0.00112128	7451.01	-0.000135155	6326.31	0.00112	6326.31	0.000326674
7452.68	-0.00106556	7452.68	-0.000139244	6326.71	0.0011	6326.71	0.000325923
7454.34	-0.00106902	7454.34	-0.000105705	6327.11	0.0011	6327.11	0.000326752
7456.01	-0.00102899	7456.01	-0.000157876	6327.51	0.00112	6327.51	0.000331001
7457.68	-0.00105146	7457.68	-0.000113728	6327.91	0.00112	6327.91	0.000335845
7459.35	-0.00106086	7459.35	-0.000124959	6328.31	0.00111	6328.31	0.000333332
7461.02	-0.00108874	7461.02	-0.00011026	6328.71	0.00109	6328.71	0.000326234
7462.69	-0.00103431	7462.69	-0.000125581	6329.11	0.00109	6329.11	0.000298671
7464.36	-0.0010229	7464.36	-0.000103687	6329.51	0.00109	6329.51	0.000307323
7466.03	-0.00105125	7466.03	-9.63886e-05	6329.91	0.00111	6329.91	0.000317504
7467.7	-0.00107201	7467.7	-0.000133189	6330.32	0.00113	6330.32	0.000317556
7469.38	-0.00106767	7469.38	-9.48876e-05	6330.72	0.00111	6330.72	0.000305018
7471.05	-0.00100771	7471.05	-0.000100995	6331.12	0.00109	6331.12	0.00030007
7472.72	-0.00104324	7472.72	-8.42248e-05	6331.52	0.00111	6331.52	0.000303593
7474.4	-0.000976149	7474.4	-0.000123976	6331.92	0.00107	6331.92	0.000303127
7476.08	-0.00103746	7476.08	-9.77862e-05	6332.32	0.00105	6332.32	0.00028844
7477.75	-0.00101458	7477.75	-0.000113625	6332.72	0.00105	6332.72	0.000274245
7479.43	-0.00102584	7479.43	-8.37072e-05	6333.12	0.00107	6333.12	0.000299526
7481.11	-0.00104578	7481.11	-9.76827e-05	6333.52	0.00106	6333.52	0.000281627
7482.79	-0.00102067	7482.79	-8.66058e-05	6333.92	0.00103	6333.92	0.000269349
7484.47	-0.0010608	7484.47	-9.20407e-05	6334.33	0.00104	6334.33	0.000274167
7486.15	-0.00101938	7486.15	-9.66475e-05	6334.73	0.00106	6334.73	0.000265076
7487.83	-0.00104077	7487.83	-8.04979e-05	6335.13	0.00106	6335.13	0.000297091
7489.51	-0.000996501	7489.51	-0.000108863	6335.53	0.00102	6335.53	0.000287429
7491.2	-0.00100074	7491.2	-6.84371e-05	6335.93	0.000984186	6335.93	0.000262537
7492.88	-0.000948926	7492.88	-0.00012646	6336.33	0.000997755	6336.33	0.000244614
7494.57	-0.0010277	7494.57	-5.50818e-05	6336.73	0.000993111	6336.73	0.000253964
7496.25	-0.00099304	7496.25	-0.000111606	6337.14	0.000972874	6337.14	0.000222495
7497.94	-0.00103245	7497.94	-7.59428e-05	6337.54	0.000987403	6337.54	0.000253627
7499.62	-0.00102042	7499.62	-0.000102703	6337.94	0.000979594	6337.94	0.000240236
7501.31	-0.001023	7501.31	-9.18855e-05	6338.34	0.000994382	6338.34	0.000232803
7503	-0.0010152	7503	-9.56122e-05	6338.74	0.000988674	6338.74	0.000211618
7504.69	-0.00103978	7504.69	-0.000107672	6339.14	0.00094802	6339.14	0.000197218
7506.38	-0.00101272	7506.38	-7.49075e-05	6339.55	0.000940186	6339.55	0.000184114
7508.07	-0.000979352	7508.07	-0.000106223	6339.95	0.000945867	6339.95	0.000181032
7509.76	-0.00102016	7509.76	-6.05689e-05	6340.35	0.000932559	6340.35	0.000173626
7511.46	-0.000971449	7511.46	-0.000123148	6340.75	0.000944855	6340.75	0.000193334
7513.15	-0.000998154	7513.15	-6.75054e-05	6341.15	0.000935698	6341.15	0.000181369
7514.84	-0.000983588	7514.84	-0.000114608	6341.56	0.000935542	6341.56	0.000183234
7516.54	-0.00103421	7516.54	-7.7651e-05	6341.96	0.000962237	6341.96	0.000189397
7518.23	-0.000991697	7518.23	-0.000111451	6342.36	0.000953909	6342.36	0.000169068
7519.93	-0.00100223	7519.93	-7.07147e-05	6342.76	0.000934141	6342.76	0.000177925
7521.62	-0.00101184	7521.62	-0.000115126	6343.17	0.000924439	6343.17	0.000148197
7523.32	-0.00100409	7523.32	-9.40594e-05	6343.57	0.000890743	6343.57	0.000131495
7525.02	-0.00102393	7525.02	-6.6936e-05	6343.97	0.000913233	6343.97	0.000131572
7526.72	-0.000976511	7526.72	-9.74756e-05	6344.37	0.000904776	6344.37	0.000109201
7528.42	-0.00097274	7528.42	-4.91806e-05	6344.78	0.000918084	6344.78	0.000140868
7530.12	-0.00098023	7530.12	-9.5457e-05	6345.18	0.000883999	6345.18	0.000111376
7531.82	-0.00100663	7531.82	-4.41075e-05	6345.58	0.000891858	6345.58	0.000124762
7533.52	-0.00100316	7533.52	-0.000129514	6345.98	0.000906826	6345.98	0.000127015
7535.23	-0.00105321	7535.23	-4.8197e-05	6346.39	0.000920937	6346.39	0.000134006
7536.93	-0.000994022	7536.93	-8.1792e-05	6346.79	0.000912922	6346.79	0.000131495
7538.64	-0.00101608	7538.64	-7.37687e-05	6347.19	0.000882235	6347.19	0.000110884
7540.34	-0.000962512	7540.34	-9.89767e-05	6347.59	0.000909471	6347.59	0.000113602
7542.05	-0.000997069	7542.05	-7.84274e-05	6348	0.000906696	6348	8.97559e-05
7543.75	-0.00100136	7543.75	-0.000111088	6348.4	0.000883506	6348.4	9.92323e-05
7545.46	-0.000969486	7545.46	-9.12643e-05	6348.8	0.000894323	6348.8	0.000103945
7547.17	-0.000992524	7547.17	-7.92556e-05	6349.21	0.000884284	6349.21	9.8585e-05
7548.88	-0.000975891	7548.88	-0.00010348	6349.61	0.000885918	6349.61	9.56074e-05
7550.59	-0.00100668	7550.59	-7.97215e-05	6350.01	0.000866957	6350.01	0.000109926
7552.3	-0.000993712	7552.3	-7.99285e-05	6350.42	0.000872301	6350.42	6.35029e-05
7554.01	-0.00100802	7554.01	-4.69028e-05	6350.82	0.000865168	6350.82	9.77046e-05
7555.72	-0.000987565	7555.72	-0.00010555	6351.22	0.00088501	6351.22	8.01762e-05
7557.44	-0.000986945	7557.44	-0.000108914	6351.63	0.000878707	6351.63	9.15942e-05
7559.15	-0.000970622	7559.15	-0.000114867	6352.03	0.000882676	6352.03	9.35102e-05
7560.87	-0.000991232	7560.87	-6.9783e-05	6352.43	0.000885322	6352.43	0.000110961
7562.58	-0.000961324	7562.58	-0.00010995	6352.84	0.000891521	6352.84	9.17755e-05
7564.3	-0.000954092	7564.3	-4.41592e-05	6353.24	0.000905658	6353.24	9.35102e-05
7566.01	-0.00100513	7566.01	-0.000117196	6353.64	0.000867606	6353.64	9.85332e-05
7567.73	-0.00094345	7567.73	-0.000109639	6354.05	0.000867865	6354.05	9.0688e-05
7569.45	-0.000996449	7569.45	-0.000105343	6354.45	0.000892533	6354.45	0.000102779
7571.17	-0.000985499	7571.17	-0.000104826	6354.86	0.000864156	6354.86	8.14449e-05
7572.89	-0.00101458	7572.89	-0.000114711	6355.26	0.000867035	6355.26	6.37618e-05
7574.61	-0.00101422	7574.61	-0.000112331	6355.66	0.000888227	6355.66	9.65395e-05
7576.33	-0.000974496	7576.33	-9.04362e-05	6356.07	0.000861459	6356.07	6.70239e-05
7578.05	-0.00097367	7578.05	-0.000114246	6356.47	0.000872404	6356.47	6.8655e-05
7579.78	-0.00100373	7579.78	-0.000103169	6356.88	0.000887786	6356.88	7.07262e-05
7581.5	-0.00100879	7581.5	-0.000113055	6357.28	0.000878656	6357.28	7.59561e-05
7583.23	-0.0010168	7583.23	-9.59228e-05	6357.68	0.000863689	6357.68	7.06744e-05
7584.95	-0.000944328	7584.95	-0.000149854	6358.09	0.00087269	6358.09	8.19368e-05
7586.68	-0.00101195	7586.68	-0.000144316	6358.49	0.000881846	6358.49	6.84738e-05
7588.41	-0.00099304	7588.41	-0.000116834	6358.9	0.000883221	6358.9	8.20922e-05
7590.13	-0.000992214	7590.13	-8.36554e-05	6359.3	0.000885607	6359.3	6.53411e-05
7591.86	-0.000996449	7591.86	-0.000132464	6359.7	0.000886722	6359.7	6.52375e-05
7593.59	-0.000978267	7593.59	-0.000120043	6360.11	0.000876295	6360.11	7.31858e-05
7595.32	-0.000969744	7595.32	-0.000114039	6360.51	0.000860732	6360.51	6.41243e-05
7597.05	-0.000960756	7597.05	-0.000133292	6360.92	0.000877981	6360.92	6.67909e-05
7598.78	-0.000991232	7598.78	-8.44836e-05	6361.32	0.000866828	6361.32	7.12699e-05
7600.52	-0.00098679	7600.52	-0.000142142	6361.73	0.000878137	6361.73	6.04221e-05
7602.25	-0.000969434	7602.25	-0.000139658	6362.13	0.000885244	6362.13	8.70891e-05
7603.98	-0.000967729	7603.98	-0.000144161	6362.54	0.000897617	6362.54	7.50758e-05
7605.72	-0.000962719	7605.72	-0.000299449	6362.94	0.000867995	6362.94	5.29659e-05
7607.46	-0.000969021	7607.46	-4.08979e-05	6363.35	0.000871989	6363.35	4.64937e-05
7609.19	-0.000998516	7609.19	4.56911e-05	6363.75	0.000870252	6363.75	6.90693e-05
7610.93	-0.000972068	7610.93	-6.83853e-05	6364.16	0.000853626	6364.16	4.20408e-05
7612.67	-0.000987823	7612.67	-9.73721e-05	6364.56	0.000883169	6364.56	6.59883e-05
7614.41	-0.000954867	7614.41	-0.000228151	6364.97	0.000853392	6364.97	2.17706e-05
7616.15	-0.000970725	7616.15	-0.000187788	6365.37	0.000867087	6365.37	6.68168e-05
7617.89	-0.000967264	7617.89	-0.000111037	6365.78	0.000880912	6365.78	7.90371e-05
7619.63	-0.000988391	7619.63	-0.000113469	6366.18	0.000844211	6366.18	2.33239e-05
7621.37	-0.000985809	7621.37	-0.000131688	6366.59	0.000850228	6366.59	3.31871e-05
7623.11	-0.000982555	7623.11	-0.000128582	6366.99	0.000877514	6366.99	4.05393e-05
7624.86	-0.000962099	7624.86	-0.000204658	6367.4	0.00086107	6367.4	5.20598e-05
7626.6	-0.000975168	7626.6	-8.13261e-05	6367.8	0.000862859	6367.8	4.09276e-05
7628.35	-0.000958431	7628.35	-0.000121595	6368.21	0.000865272	6368.21	3.82611e-05
7630.09	-0.000969486	7630.09	-0.000111088	6368.62	0.000848127	6368.62	3.52322e-05
7631.84	-0.000984982	7631.84	-0.000118127	6369.02	0.000859047	6369.02	3.80282e-05
7633.59	-0.000931775	7633.59	-0.000144989	6369.43	0.000862211	6369.43	4.33094e-05
7635.34	-0.000967523	7635.34	-0.0001129	6369.83	0.000855882	6369.83	3.5517e-05
7637.09	-0.000934254	7637.09	-0.000136398	6370.24	0.000842914	6370.24	1.46776e-05
7638.84	-0.00101448	7638.84	-9.40077e-05	6370.64	0.000844418	6370.64	9.16373e-06
7640.59	-0.000966128	7640.59	-0.000121233	6371.05	0.000848905	6371.05	1.73439e-05
7642.34	-0.000969279	7642.34	-0.000112331	6371.46	0.000853522	6371.46	2.8812e-05
7644.09	-0.000958483	7644.09	-0.000132775	6371.86	0.000859695	6371.86	3.70444e-05
7645.84	-0.000981883	7645.84	-0.000120405	6372.27	0.000855545	6372.27	1.7784e-05
7647.6	-0.000943088	7647.6	-0.000121647	6372.67	0.000859825	6372.67	2.70776e-05
7649.35	-0.000977492	7649.35	-0.000108966	6373.08	0.000837441	6373.08	1.01474e-05
7651.11	-0.000936734	7651.11	-0.000121543	6373.49	0.000841098	6373.49	1.42116e-05
7652.87	-0.000978525	7652.87	-0.000110105	6373.89	0.000852822	6373.89	3.5051e-05
7654.62	-0.000948409	7654.62	-0.000124959	6374.3	0.000861199	6374.3	3.87012e-05
7656.38	-0.00097057	7656.38	-9.74239e-05	6374.71	0.000857516	6374.71	3.55429e-05
7658.14	-0.000953472	7658.14	-0.000150682	6375.11	0.000873649	6375.11	2.58867e-05
7659.9	-0.000964268	7659.9	-0.000105964	6375.52	0.000850565	6375.52	2.08128e-05
7661.66	-0.00097212	7661.66	-7.80651e-05	6375.92	0.000869863	6375.92	2.13823e-05
7663.42	-0.000940815	7663.42	-0.000111554	6376.33	0.000844055	6376.33	2.15118e-05
7665.18	-0.000960549	7665.18	-0.000140849	6376.74	0.000824811	6376.74	2.50325e-05
7666.95	-0.000957656	7666.95	-0.000118593	6377.14	0.000835133	6377.14	-3.98642e-06
7668.71	-0.000978525	7668.71	-0.000105395	6377.55	0.000843951	6377.55	5.30666e-06
7670.48	-0.000966903	7670.48	-8.89868e-05	6377.96	0.000854637	6377.96	4.29709e-06
7672.24	-0.00097243	7672.24	-0.000129514	6378.36	0.00085941	6378.36	1.24254e-05
7674.01	-0.000929657	7674.01	-0.000142557	6378.77	0.000860447	6378.77	3.97886e-05
7675.78	-0.000988133	7675.78	-9.25584e-05	6379.18	0.000859254	6379.18	1.38233e-05
7677.54	-0.000970932	7677.54	-0.000110157	6379.59	0.000860966	6379.59	1.38751e-05
7679.31	-0.000984207	7679.31	-9.62334e-05	6379.99	0.00084032	6379.99	2.62233e-05
7681.08	-0.00094066	7681.08	-7.97215e-05	6380.4	0.000858683	6380.4	3.99439e-05
7682.85	-0.00095373	7682.85	-0.000132102	6380.81	0.000830724	6380.81	2.44112e-05
7684.62	-0.000933738	7684.62	-0.000142298	6381.21	0.000841565	6381.21	1.13898e-06
7686.4	-0.000971707	7686.4	-9.41112e-05	6381.62	0.000848594	6381.62	5.35843e-06
7688.17	-0.000955848	7688.17	-0.000129359	6382.03	0.000833603	6382.03	1.47553e-05
7689.94	-0.00100239	7689.94	-0.000108604	6382.44	0.000865349	6382.44	2.78024e-05
7691.72	-0.000939162	7691.72	-0.000141004	6382.84	0.000861666	6382.84	3.11937e-05
7693.49	-0.000966335	7693.49	-8.93492e-05	6383.25	0.000834303	6383.25	2.07352e-05
7695.27	-0.000937147	7695.27	-0.000145507	6383.66	0.000847479	6383.66	1.91819e-05
7697.04	-0.000970622	7697.04	-9.5871e-05	6384.07	0.000845118	6384.07	-6.83384e-06
7698.82	-0.000970002	7698.82	-0.000120405	6384.47	0.000832462	6384.47	6.9375e-06
7700.6	-0.000959361	7700.6	-0.000133137	6384.88	0.000836093	6384.88	1.88968e-06
7702.38	-0.000949907	7702.38	-0.000154408	6385.29	0.000861744	6385.29	-9.31885e-06
7704.16	-0.000955848	7704.16	-0.000106068	6385.7	0.000887475	6385.7	3.69926e-05
7705.94	-0.000974393	7705.94	-0.000100581	6386.1	0.000853678	6386.1	6.23856e-06
7707.72	-0.000986377	7707.72	-0.000138106	6386.51	0.000858683	6386.51	-7.76578e-07
7709.51	-0.000959981	7709.51	-0.000123562	6386.92	0.000873909	6386.92	3.36272e-05
7711.29	-0.000955125	7711.29	-0.000134638	6387.33	0.000826263	6387.33	3.77937e-06
7713.07	-0.000946859	7713.07	-0.000125684	6387.74	0.000851629	6387.74	-6.16082e-06
7714.86	-0.000946859	7714.86	-0.000144316	6388.14	0.000844859	6388.14	8.0765e-06
7716.64	-0.000957811	7716.64	-0.000114763	6388.55	0.000821828	6388.55	1.13898e-06
7718.43	-0.000937664	7718.43	-0.000135673	6388.96	0.0008633	6388.96	4.99602e-06
7720.22	-0.000972998	7720.22	-0.000118179	6389.37	0.00084932	6389.37	5.02191e-06
7722.01	-0.000961427	7722.01	-0.000150527	6389.78	0.0008349	6389.78	-2.5886e-07
7723.8	-0.000977182	7723.8	-0.000125632	6390.18	0.000846415	6390.18	1.13123e-05
7725.59	-0.000936321	7725.59	-0.000131326	6390.59	0.000847271	6390.59	2.20554e-05
7727.38	-0.000973876	7727.38	-0.000107621	6391	0.000845093	6391	1.24513e-05
7729.17	-0.000923716	7729.17	-0.000118645	6391.41	0.000830024	6391.41	-1.19074e-05
7730.96	-0.000954298	7730.96	-0.000110053	6391.82	0.000817497	6391.82	-2.12264e-06
7732.76	-0.000916173	7732.76	-0.000130601	6392.23	0.000831839	6392.23	-1.03543e-05
7734.55	-0.000929243	7734.55	-0.00014768	6392.64	0.000857516	6392.64	7.40345e-06
7736.35	-0.000945671	7736.35	-0.000136398	6393.04	0.000830724	6393.04	-5.38425e-06
7738.14	-0.000937509	7738.14	-8.30342e-05	6393.45	0.000819157	6393.45	1.08981e-05
7739.94	-0.000930638	7739.94	-0.000153063	6393.86	0.000835782	6393.86	1.47553e-05
7741.74	-0.000961169	7741.74	-0.000125581	6394.27	0.000852433	6394.27	-1.13898e-06
7743.53	-0.000930586	7743.53	-0.000162792	6394.68	0.000827975	6394.68	-1.59455e-05
7745.33	-0.000966696	7745.33	-0.000110778	6395.09	0.000821517	6395.09	-1.88446e-05
7747.13	-0.000934719	7747.13	-0.000136139	6395.5	0.000820765	6395.5	-1.20627e-05
7748.93	-0.000959154	7748.93	-0.000105654	6395.91	0.000822062	6395.91	5.02191e-06
7750.74	-0.000921959	7750.74	-0.000137485	6396.32	0.000819987	6396.32	-2.0087e-05
7752.54	-0.000926867	7752.54	-0.000107931	6396.72	0.000833551	6396.72	-1.55316e-07
7754.34	-0.000908733	7754.34	-0.000141263	6397.13	0.000821932	6397.13	-1.83786e-05
7756.15	-0.000937251	7756.15	-0.000112279	6397.54	0.000815345	6397.54	-1.52207e-05
7757.95	-0.000944018	7757.95	-0.000141159	6397.95	0.000839776	6397.95	-2.27796e-06
7759.76	-0.000949701	7759.76	-0.000134638	6398.36	0.000830698	6398.36	-1.06649e-05
7761.56	-0.000928468	7761.56	-0.000121026	6398.77	0.000804919	6398.77	-6.52322e-06
7763.37	-0.000930535	7763.37	-0.000118076	6399.18	0.000797995	6399.18	-3.60318e-05
7765.18	-0.000933841	7765.18	-0.000128065	6399.59	0.000801418	6399.59	-2.13813e-05
7766.99	-0.000943243	7766.99	-0.000149802	6400	0.000793353	6400	-2.22096e-05
7768.8	-0.000929502	7768.8	-0.000124131	6400.41	0.000791356	6400.41	-2.82148e-05
7770.61	-0.000912866	7770.61	-0.000136967	6400.82	0.000819676	6400.82	-9.62947e-06
7772.42	-0.000911368	7772.42	-0.000126202	6401.23	0.000800173	6401.23	-5.85019e-06
7774.24	-0.000920409	7774.24	-0.000126667	6401.64	0.000790604	6401.64	-3.40128e-05
7776.05	-0.000928985	7776.05	-0.000123976	6402.05	0.0008023	6402.05	-2.076e-05
7777.86	-0.00095652	7777.86	-0.00014354	6402.46	0.000785573	6402.46	-3.31328e-05
7779.68	-0.000949132	7779.68	-0.000131429	6402.87	0.000784743	6402.87	-7.35155e-06
7781.5	-0.000926247	7781.5	-0.000141521	6403.28	0.000799239	6403.28	-2.41251e-05
7783.31	-0.000934668	7783.31	-0.000133913	6403.69	0.000811714	6403.69	-2.32967e-05
7785.13	-0.000903722	7785.13	-0.000144885	6404.1	0.000810028	6404.1	-3.15808e-06
7786.95	-0.000926557	7786.95	-0.00014266	6404.51	0.000800692	6404.51	-2.51087e-05
7788.77	-0.00092635	7788.77	-0.000128634	6404.92	0.00079745	6404.92	-1.93105e-05
7790.59	-0.000929553	7790.59	-0.000137226	6405.33	0.000816667	6405.33	-3.36516e-06
7792.41	-0.000932911	7792.41	-0.000133241	6405.74	0.00081633	6405.74	-2.38662e-05
7794.23	-0.000932136	7794.23	-0.000112589	6406.15	0.000791589	6406.15	-3.28222e-05
7796.06	-0.000948513	7796.06	-0.000129462	6406.56	0.000787336	6406.56	-3.38058e-05
7797.88	-0.000946756	7797.88	-9.51464e-05	6406.97	0.000801911	6406.97	-9.9401e-06
7799.7	-0.000935133	7799.7	-0.000146749	6407.38	0.000793975	6407.38	-2.85254e-05
7801.53	-0.000919944	7801.53	-0.000124235	6407.79	0.000781164	6407.79	-4.86111e-05
7803.36	-0.000924387	7803.36	-0.000156685	6408.2	0.00081008	6408.2	-3.44787e-05
7805.18	-0.000928417	7805.18	-0.0001188	6408.61	0.000790759	6408.61	-4.49875e-05
7807.01	-0.000914261	7807.01	-0.000130808	6409.02	0.000802844	6409.02	-1.3357e-05
7808.84	-0.000920409	7808.84	-0.000130135	6409.43	0.0008023	6409.43	-8.90468e-06
7810.67	-0.000903825	7810.67	-0.000148042	6409.85	0.000788892	6409.85	-4.18815e-05
7812.5	-0.000912815	7812.5	-0.000122216	6410.26	0.000783654	6410.26	-3.70671e-05
7814.33	-0.000903722	7814.33	-0.000154874	6410.67	0.000790681	6410.67	-3.28222e-05
7816.16	-0.000926867	7816.16	-0.0001232	6411.08	0.000780542	6411.08	-5.73078e-05
7818	-0.000918239	7818	-0.000149906	6411.49	0.000777819	6411.49	-4.34345e-05
7819.83	-0.000929037	7819.83	-0.000117351	6411.9	0.000800381	6411.9	-4.40557e-05
7821.67	-0.000919944	7821.67	-0.000147887	6412.31	0.000805412	6412.31	-2.92502e-05
7823.5	-0.000899589	7823.5	-0.000129566	6412.72	0.000791174	6412.72	-3.09585e-05
7825.34	-0.000901242	7825.34	-0.000139555	6413.13	0.000772373	6413.13	-4.1985e-05
7827.18	-0.000921649	7827.18	-0.000140021	6413.55	0.000779038	6413.55	-4.68511e-05
7829.01	-0.000905168	7829.01	-0.000145144	6413.96	0.000792912	6413.96	-5.96889e-05
7830.85	-0.000921856	7830.85	-0.000139399	6414.37	0.000819053	6414.37	-3.19421e-05
7832.69	-0.000888171	7832.69	-0.000138157	6414.78	0.000780645	6414.78	-2.74383e-05
7834.53	-0.000920771	7834.53	-0.000138468	6415.19	0.000801418	6415.19	-2.65582e-05
7836.38	-0.000921597	7836.38	-0.000148819	6415.6	0.000798176	6415.6	-1.64114e-05
7838.22	-0.000919221	7838.22	-0.000145972	6416.01	0.000798487	6416.01	-3.23563e-05
7840.06	-0.000918653	7840.06	-0.000132671	6416.43	0.00075308	6416.43	-5.82913e-05
7841.91	-0.000923561	7841.91	-0.000145403	6416.84	0.000765371	6416.84	-6.2536e-05
7843.75	-0.000873704	7843.75	-0.000153994	6417.25	0.000802326	6417.25	-5.38912e-05
7845.6	-0.000912298	7845.6	-0.000139917	6417.66	0.000792186	6417.66	-3.14244e-05
7847.45	-0.000896747	7847.45	-0.000152079	6418.07	0.000807071	6418.07	-1.78092e-05
7849.29	-0.000936011	7849.29	-0.00012703	6418.49	0.000786013	6418.49	-4.78864e-05
7851.14	-0.000915501	7851.14	-0.000147318	6418.9	0.000798021	6418.9	-3.14244e-05
7852.99	-0.000926247	7852.99	-0.000141314	6419.31	0.000808628	6419.31	-2.91984e-05
7854.84	-0.000922321	7854.84	-0.000152131	6419.72	0.00080204	6419.72	-1.64114e-05
7856.69	-0.000931051	7856.69	-0.000153011	6420.13	0.000785469	6420.13	-5.17688e-05
7858.55	-0.000931981	7858.55	-0.000152235	6420.55	0.000811428	6420.55	-3.01302e-05
7860.4	-0.000928572	7860.4	-0.000128272	6420.96	0.000807097	6420.96	-1.75503e-05
7862.25	-0.000910593	7862.25	-0.000147421	6421.37	0.000798747	6421.37	-5.29077e-05
7864.11	-0.000912711	7864.11	-0.000146852	6421.78	0.000773125	6421.78	-6.50207e-05
7865.96	-0.000897419	7865.96	-0.000144109	6422.2	0.000806864	6422.2	-3.58765e-05
7867.82	-0.000929398	7867.82	-0.000142815	6422.61	0.000824733	6422.61	-2.02941e-05
7869.68	-0.000908888	7869.68	-0.000132361	6423.02	0.000825407	6423.02	-5.02676e-05
7871.54	-0.000909043	7871.54	-0.000165949	6423.43	0.000836767	6423.43	-2.35038e-05
7873.4	-0.000916638	7873.4	-0.00013971	6423.85	0.000793716	6423.85	-4.94394e-05
7875.26	-0.000930948	7875.26	-0.000152907	6424.26	0.000787777	6424.26	-2.91984e-05
7877.12	-0.000918239	7877.12	-0.000158134	6424.67	0.000803389	6424.67	-5.75148e-05
7878.98	-0.00096556	7878.98	-0.000148353	6425.08	0.000795842	6425.08	-3.78954e-05
7880.84	-0.000927125	7880.84	-0.000158911	6425.5	0.000812051	6425.5	-3.64459e-05
7882.71	-0.000936011	7882.71	-0.000151872	6425.91	0.000821361	6425.91	-1.95176e-05
7884.57	-0.000909198	7884.57	-0.000159998	6426.32	0.000808809	6426.32	-1.17521e-05
7886.44	-0.000915398	7886.44	-0.000152804	6426.74	0.000829635	6426.74	-3.44787e-05
7888.3	-0.000925782	7888.3	-0.000141056	6427.15	0.000818068	6427.15	-3.32881e-05
7890.17	-0.000915966	7890.17	-0.000142557	6427.56	0.000806734	6427.56	-1.7395e-05
[truncated: 13,558 more rows]

## Sheet: Photoluminescence
nm	Cm_PL
400.53	-130.84
[truncated: 397 more rows]
